# Supplementary material
Source: PubMed Central journal article supplement (PMC5852674)
Supplement: NIHMS946949-supplement.pdf [file NIHMS946949-supplement.pdf]

# Supplementary Online Content

Micha R, Peñalvo JL, Cudhea F, Imamura F, Rehm CD, Mozaffarian D. Association between dietary factors and mortality from heart disease, stroke, and type 2 diabetes in the United States. *JAMA*. doi:10.1001/jama.2017.0947

## Table of Contents

|                                                                                                                                                                                                                                                                                                         |    |
|---------------------------------------------------------------------------------------------------------------------------------------------------------------------------------------------------------------------------------------------------------------------------------------------------------|----|
| <b>eAppendix</b> .....                                                                                                                                                                                                                                                                                  | 3  |
| <b>eAppendix 1.</b> Comparative Risk Assessment. ....                                                                                                                                                                                                                                                   | 3  |
| Population Attributable Fraction .....                                                                                                                                                                                                                                                                  | 3  |
| Computation .....                                                                                                                                                                                                                                                                                       | 4  |
| Joint PAF.....                                                                                                                                                                                                                                                                                          | 4  |
| Monte Carlo Simulations.....                                                                                                                                                                                                                                                                            | 5  |
| Population Attributable Fraction via Mediated Effects .....                                                                                                                                                                                                                                             | 6  |
| <b>eAppendix 2.</b> Etiologic Relationships of Dietary Factors with Cardiometabolic Disease Risk .....                                                                                                                                                                                                  | 7  |
| <b>TABLES</b> .....                                                                                                                                                                                                                                                                                     | 9  |
| <b>eTable 1.</b> Grading of evidence for etiologic relationships of specific dietary factors with cardiometabolic outcomes... 10                                                                                                                                                                        |    |
| <b>eTable 2.</b> Estimates of etiologic effect sizes of dietary factors with risk of cardiometabolic diseases..... 13                                                                                                                                                                                   |    |
| <b>eTable 3.</b> Data sources and identified optimal intake levels of specific dietary factors associated with cardiometabolic diseases. .... 17                                                                                                                                                        |    |
| <b>eTable 4.</b> Validity analyses comparing the observed relative risks for CHD based on evidence from prospective observational studies and randomized trials of dietary patterns versus the estimated relative risks for CHD based on the present analysis of individual dietary components. .... 20 |    |
| <b>eTable 5.</b> Dietary factors having probable or convincing evidence for causal relationships with cardiometabolic outcomes and standardized magnitudes of effect sizes. .... 22                                                                                                                     |    |
| <b>eTable 6.</b> Participant sociodemographics by combined 2-year NHANES Cycles, 1999-2002 and 2009-2012. .... 26                                                                                                                                                                                       |    |
| <b>eTable 7.</b> US consumption levels for key dietary factors in 2009-2012 by population subgroups. .... 27                                                                                                                                                                                            |    |
| <b>eTable 8.</b> US consumption levels for key dietary factors in 1999-2002 by population subgroups. .... 31                                                                                                                                                                                            |    |
| <b>eTable 9.</b> US consumption levels (median and inter-quartile range) for key dietary factors in 2009-2012 by population subgroups..... 35                                                                                                                                                           |    |
| <b>eTable 10.</b> US consumption levels (median and inter-quartile range) for key dietary factors in 1999-2002 by population subgroups..... 39                                                                                                                                                          |    |
| <b>eTable 11.</b> Cardiometabolic deaths in the US in 2012 by population subgroups..... 43                                                                                                                                                                                                              |    |
| <b>eTable 12.</b> Cardiometabolic deaths in the US in 2002 by population subgroups..... 49                                                                                                                                                                                                              |    |
| <b>eTable 13.</b> Cardiometabolic death rates associated with suboptimal dietary habits in the US and change between 2002 and 2012..... 55                                                                                                                                                              |    |
| <b>eTable 14.</b> Absolute and proportional cardiometabolic disease mortality associated with suboptimal dietary habits in the US in 2012 by population subgroups. .... 58                                                                                                                              |    |
| <b>FIGURES</b> .....                                                                                                                                                                                                                                                                                    | 79 |
| <b>eFigure 1.</b> Absolute and proportional cardiometabolic disease mortality associated with suboptimal dietary habits among US adults in 2012. .... 80                                                                                                                                                |    |

## Supplement

### Association between Dietary Factors and Mortality from Heart Disease, Stroke, and Diabetes in the United States

Micha R, Peñalvo JP, Cudhea F, Imamura F, Rehm CD, Mozaffarian D

#### Table of Contents

|                                                                                                                                                                                                                                      |     |
|--------------------------------------------------------------------------------------------------------------------------------------------------------------------------------------------------------------------------------------|-----|
| <b>eFigure 2.</b> Proportional cardiometabolic disease mortality associated with suboptimal dietary habits in the US in 2012 by age.....                                                                                             | 81  |
| <b>eFigure 3.</b> Absolute cardiometabolic disease mortality associated with suboptimal dietary habits in the US in 2012 by race. ....                                                                                               | 82  |
| <b>eFigure 4.</b> Absolute cardiometabolic disease mortality associated with suboptimal dietary habits in the US in 2012 by education. ....                                                                                          | 83  |
| <b>eFigure 5.</b> Proportional cardiometabolic disease mortality associated with suboptimal dietary habits in the US in 2012 by population subgroups. ....                                                                           | 84  |
| <b>eFigure 6.</b> Proportional cardiometabolic disease mortality associated with suboptimal dietary habits in the US in 2012 by age, sex, and race.....                                                                              | 87  |
| <b>eFigure 7.</b> Proportional cardiometabolic disease mortality associated with suboptimal dietary habits in the US in 2012 by age, sex, and education.....                                                                         | 88  |
| <b>eFigure 8.</b> Cardiometabolic deaths per 1 million adults associated with dietary habits in the US in 2002 and 2012 and change in proportional cardiometabolic disease mortality and dietary intakes between 2002 and 2012. .... | 89  |
| <b>eFigure 9.</b> Absolute and proportional cardiometabolic disease mortality associated with suboptimal dietary habits in the US in 2002 overall, and by gender. ....                                                               | 90  |
| <b>eFigure 10.</b> Absolute and proportional cardiometabolic disease mortality associated with overall suboptimal diet in the US in 2002 by population subgroups. ....                                                               | 92  |
| <b>eFigure 11.</b> Proportional cardiometabolic disease mortality associated with suboptimal dietary habits in the US in 2002 by age. ....                                                                                           | 93  |
| <b>eFigure 12.</b> Absolute cardiometabolic disease mortality associated with suboptimal dietary habits in the US in 2002 by race. ....                                                                                              | 94  |
| <b>eFigure 13.</b> Absolute cardiometabolic disease mortality associated with suboptimal dietary habits in the US in 2002 by education. ....                                                                                         | 95  |
| <b>eFigure 14.</b> Proportional cardiometabolic disease mortality associated with suboptimal dietary habits in the US in 2002 by population subgroups. ....                                                                          | 96  |
| <b>eFigure 15.</b> Proportional cardiometabolic disease mortality associated with suboptimal dietary habits in the US in 2002 by age, sex, and race.....                                                                             | 99  |
| <b>eFigure 16.</b> Proportional cardiometabolic disease mortality associated with suboptimal dietary habits in the US in 2002 by age, sex, and education.....                                                                        | 100 |
| <b>eFigure 17.</b> Proportional cardiometabolic disease mortality associated with sugar-sweetened beverages, nuts/seeds and sodium by age in 2002 and 2012.....                                                                      | 101 |
| <b>eFigure 18.</b> Proportional diabetes and cardiometabolic disease mortality associated with sugar-sweetened beverages and overall suboptimal diet in 2012 for direct and BMI-mediated vs. total diabetes effects. ....            | 102 |
| <b>eReferences</b> .....                                                                                                                                                                                                             | 103 |

This supplementary material has been provided by the authors to give readers additional information about their work.

## eAppendix

### eAppendix 1. Comparative Risk Assessment.

#### Population Attributable Fraction

The standard description of the population attributable fraction (PAF) used to communicate that a comparative risk assessment framework has been used to estimate attributable mortality, gives only a vague insight as to how the PAF is calculated and what assumptions are being made. Because of this, we go into more detail here.

The standard PAF formula used is as follows:

$$\frac{\int_{x=0}^m RR(x)P(x)dx - 1}{\int_{x=0}^m RR(x)P(x)dx}$$

where  $P(x)$  is the distribution of current dietary consumption,  $RR(x)$  is the relative risk of mortality at exposure level  $x$ , and  $m$  is the maximum exposure level. As described by Vander Hoorn et al,<sup>1,2</sup> this is a special case of the more commonly used (for descriptive purposes) formula:

$$\frac{\int_{x=0}^m RR(x)P(x)dx - \int_{x=0}^m RR(x)P'(x)dx}{\int_{x=0}^m RR(x)P(x)dx}$$

where the alternative distribution ( $P'(x)$ ) is the same as the theoretical minimum risk (optimal for diet) exposure distribution.

#### $P(x)$

We assumed current dietary intake follows a gamma distribution for all foods and nutrients of interest. Previous research using comparative risk assessment in the field of nutrition has assumed intake follows a normal distribution or some variation thereof. However, National Health and Nutrition Examination Survey (NHANES) data<sup>3</sup> showed that intake is right skewed for most foods/nutrients of interest (in some cases, as with nuts/seeds, extremely so). Because distributions of many dietary factors are non-normal, we utilized a gamma distribution for each factor after confirming, using individual-level NHANES data, that this estimation is similar to the normal distribution for normally distributed dietary factors and closer to observed data for skewed dietary factors than normal or log-normal distributions; and that the gamma distribution also performs optimally for estimating population attributable fractions. Specifically, based on a visual inspection of histograms, we concluded that, overall, the gamma distribution fit the NHANES data better than an alternative right-skewed distribution (the log-normal), particularly for foods where the intake is highly skewed, such as nuts/seeds, sugar-sweetened beverages (SSBs), and processed meats. Simulations done to compare estimated attributable mortality estimates assuming gamma, normal, and log-normal distributions to mortality estimates based on a non-parametric approach showed that estimates assuming the gamma distribution gave closer estimates to the non-parametric approach than the others. Because the mean and variance of the gamma distribution is a function of the parameters of the gamma distribution ( $E[X] = \frac{\alpha}{\beta}$ ,  $Var[X] = \frac{\alpha}{\beta^2}$  where  $X$  is a gamma random variable,  $\alpha$  is the shape parameter and  $\beta$  is the scale parameter), estimates for the gamma parameter can be obtained from mean and variance estimates that account for survey design characteristics.

## **RR(x)**

$RR(x)$  is defined to be

$$\begin{cases} \exp(\beta(x - y(x))) & : x - y(x) \geq 0 \\ 1 & : x - y(x) < 0 \end{cases}$$

where  $\beta$  is the the change in log relative risk per unit of exposure,  $x$  is the current exposure level, and  $y(x)$  is the optimal (theoretical minimum risk, TMRED) exposure level.  $y(x)$  is defined to be  $F_{TMRED}(F_X^{-1}(x))$ , where  $F_{TMRED}$  is the cumulative distribution function of the TMRED and  $F_X^{-1}$  is the inverse cumulative distribution function of the current exposure distribution. Implicit in how we characterize the relative risk function are some of the fundamental assumptions we make about relative risk. Namely, that relative risk increases exponentially as distance from theoretical minimum risk exposure level ( $y$ ) increases, that there is no risk associated with exposure beyond the theoretical minimum risk exposure level, and that both  $x$  and the theoretical minimum risk exposure level for an individual at exposure level  $x$  are the  $q$ -th quantile of their respective distributions (the observed exposure distribution, and the TMRED, respectively).

## **m**

In our analyses,  $m$  is defined to be  $\infty$ . Since the density of a gamma distribution approaches 0 as exposure,  $x$ , approaches infinity, and because implausibly high values of exposure should exceed the corresponding theoretical maximum exposure level, implausibly high values of exposure will make little to no contributions to the PAF.

## **Computation**

In practice, we use simple numerical integration (using Riemann sums) to compute the integrals in the PAF formula. Thus, we used the categorical equivalent of the PAF formula

$$PAF = \frac{\sum_{i=1}^n P_i (RR_i - 1)}{\sum_{i=1}^n P_i (RR_i - 1) + 1}$$

where the  $n$  categories are determined by dividing up the exposure range (chosen here to be  $[0, F_X^{-1}(\Phi(6))]$ ) into 121 intervals, each of length 0.1 when converted to the standard normal scale (except for the first one). More precisely, the range of exposure group  $i$  can be described as follows:

$$\begin{aligned} [0, F_X^{-1}(\Phi(-6))] & & : i = 1 \\ (F_X^{-1}(\Phi(-6 + 0.1(i - 2))), F_X^{-1}(\Phi(-6 + 0.1(i - 1)))) & & : i > 1 \end{aligned}$$

## **Joint PAF**

Because summing would overestimate joint relationships,<sup>4</sup> for each stratum and disease, the joint PAF of overall suboptimal diet was estimated by proportional multiplication:

$$PAF_{joint} = 1 - \prod_{r=1}^R (1 - PAF_r)$$

where  $r$  denotes each individual dietary factor, and  $R$  is the number of dietary factors. The analyses supported independent etiologic relationships of each dietary factor, and joint distributions were further

determined within each strata; maximizing validity of our joint PAFs. Joint distributions of exposure may be partly correlated among individuals, leading to overestimation of joint attributable fractions. Yet, separate validity analyses (eAppendix 2) of dietary pattern studies, including from interventional studies, suggested that the estimated etiologic relationships of individual components and their joint associations were each reasonable.

### **Monte Carlo Simulations**

Monte Carlo simulations were used to quantify uncertainty in the PAFs, incorporating stratum-specific uncertainty in dietary exposure distributions, etiologic RR estimates, and, for sodium, prevalence of hypertension and proportion of non-Hispanic Blacks, and, for SSBs, prevalence of overweight. Specifically, for each diet disease pair and stratum, we drew randomly 1,000 times from the normal distribution of the estimate of disease-specific change in the  $\log(\text{RR})$  corresponding to a one unit increase in intake, the normal distribution of the estimate of the exposure mean, and where appropriate, the normal distribution of the estimate of the prevalence of hypertension and the normal distribution of the estimate of the proportion of non-Hispanic Blacks. Draws of proportions that were less than 0 or greater than 1 were changed to 0 or 1, respectively. Likewise, draws of mean intake that were zero or less were changed to 0.00001. Each set of random draws was used to calculate the PAFs and associated mortality.

## Population Attributable Fraction via Mediated Effects

### Sugar-sweetened Beverages

Consistent with the Global Burden of Disease Study (GBD) and evidence for harms of high body mass index (BMI) on specific cardiometabolic disease outcomes the relationships of high intake of sugar-sweetened beverages (SSBs) with coronary heart disease (CHD), hypertensive heart disease, ischemic stroke, hemorrhagic stroke (only when  $\text{BMI} \geq 25 \text{ kg/m}^2$ ), and diabetes were estimated through their measured relationships BMI (associations mediated by BMI).<sup>5,6</sup> Direct relationships of SSBs with BMI,<sup>5,6</sup> which are continuous changes in BMI rather than RRs, were also included. The association of change in BMI with change in SSB consumption was assessed using multivariate linear regression accounting for within-person repeated measures, as described in earlier work;<sup>6,7</sup> separate linear relationships were estimated for  $\text{BMI} < 25$  and  $\text{BMI} \geq 25$  since the rate of associated increase in BMI due to SSB intake varies based on an individual's baseline BMI. Independently of this, additional direct relationships with CHD and diabetes (after adjustment for BMI) were included; total associations with diabetes (direct plus mediated; after excluding associations with diabetes mediated by BMI) were investigated in sensitivity analyses (eTable 5, eFigure 18). Use of the BMI-unadjusted RR to capture the total sugar-sweetened beverage diabetes associations (vs. use of separate direct and mediated RRs) resulted in substantially larger associated diabetes mortality (eFigure 18); differences in total cardiometabolic SSB-associated mortality was less profound, whereas related cardiometabolic mortality was relatively similar when overall suboptimal diet was assessed. We estimated  $\log(\text{RR})$  per unit associated increase in exposure for SSBs by taking the  $\log(\text{RR})$  per unit associated increase in exposure for BMI and multiplying it by an estimate of the associated increase in BMI per one unit associated increase in SSBs. For each stratum, the latter effect was weighted by the proportion of overweight ( $\text{BMI} \geq 25 \text{ kg/m}^2$ ) vs. non-overweight ( $\text{BMI} < 25 \text{ kg/m}^2$ ) individuals in that stratum, given the larger associations of SSBs with long-term weight gain in overweight adults (eTable 2).<sup>7</sup>

### Sodium

Consistent with GBD and evidence for harms of high blood pressure on specific cardiometabolic disease outcomes the relationships of high intake of dietary sodium with CHD, ischemic stroke, hemorrhagic stroke, hypertensive heart disease, rheumatic heart disease, cardiomyopathy and myocarditis, atrial fibrillation and flutter, aortic aneurysm, peripheral vascular disease, endocarditis, and other other cardiovascular and circulatory diseases were estimated through their measured relationships with systolic blood pressure (eTable 5).<sup>5,8</sup> Direct effects of sodium intake on SBP are continuous changes in SBP, rather than RRs. For every year above or below age 50, there was 0.105 mm Hg (95%CI: 0.047, 0.164) larger or smaller BP reduction, respectively. No further interactions with SBP reduction were assumed below age 25 or above age 70, due to limited trial evidence outside this age range. Based on the evidence, we assumed a log-linear dose-response relationship between SBP and CVD until a BP level of 115 mm Hg, below which we assumed no further lowering of risk.<sup>8</sup> We estimated  $\log(\text{RR})$  per unit increase in exposure for sodium by taking the  $\log(\text{RR})$  per unit increase in exposure for SBP and multiplying it by an estimate of the increase in SBP per unit increase in sodium. Our estimate of the increase in SBP per unit increase in sodium is a function of hypertension, age, and race, as described in earlier work.<sup>5,8</sup>

## **eAppendix 2. Etiologic Relationships of Dietary Factors with Cardiometabolic Disease Risk**

Our methods for systematically reviewing and synthesizing the evidence to quantify the magnitude of relative risks between each dietary factor and disease-specific endpoints have been described.<sup>9,10</sup> Our analysis incorporated direct associations of dietary factors with CHD, ischemic and hemorrhagic stroke, type 2 diabetes, and other cardiovascular diseases by age; additional BMI-mediated associations of SSBs by age; and SBP-mediated associations of dietary sodium by age, race, and hypertensive status (eTables 1-5). We quantified the best unbiased estimates of these relationships from recent or de novo systematic reviews and meta-analyses of prospective studies and/or clinical trials of clinical endpoints.

Our primary determinations were based on Bradford-Hill criteria,<sup>11</sup> including evidence on strength/consistency, temporality, coherence, specificity, analogy, plausibility, biological gradient, and supportive experimental data. For each potential diet-disease relationship, this evidence was reviewed and graded independently and in duplicate, with any differences resolved by consensus (eTable 1). We also qualitatively considered concordance of our conclusions with other criteria for causality of diet-chronic disease relationships, such as from the World Health Organization and WCRF/AICR.<sup>12-14</sup> We included factors which were considered, based on independent review, as having at least probable or convincing evidence for causal relationships. For each identified diet-disease relationship, we performed multiple systematic searches of PubMed to identify meta-analyses of randomized controlled trials or prospective cohort studies evaluating these specific dietary factors and cardiometabolic disease (eTable 2). For a few dietary factors for which evidence for causal relationships CVD or diabetes was identified, recently published meta-analyses were unavailable. For these diet-disease relationships, we performed de novo meta-analyses according to the PRISMA guidelines.<sup>15</sup> Published meta-analyses were eligible if including randomized trials or prospective cohorts of the identified diet-disease relationships of interest. Whenever possible, we prioritized meta-analyses that characterized dose-responses using all available data (as opposed to comparisons of extreme categories, e.g., top vs. bottom quartile). Meta-analyses including only retrospective case-control studies were excluded due to greater potential for selection bias, recall bias, and reverse causation. When more than one meta-analysis was identified for any diet-disease relationship, we included the dose-response analysis with the greatest number of studies and clinical events. For new meta-analyses, we included all randomized controlled trials, prospective cohorts, and case-control studies that assessed the diet-disease relationship of the interest.

### **Heterogeneity in Etiologic Effects**

Most meta-analyses did not stratify by sex, and those that did found no significant differences in proportional diet-disease relationships between men and women; in addition, the proportional relationships of most metabolic risk factors with chronic diseases appear similar by sex.<sup>16-24</sup> Thus, we incorporated similar proportional associations of dietary factors with cardiometabolic endpoints by sex. Conversely, we and others have shown that the proportional relationships (RRs) of major cardiometabolic risk factors decline with age, with an inverse log-linear age association.<sup>4,5</sup> To quantify and incorporate this effect size modification by age, we evaluated the proportional differences in RR of CVD for major diet-related cardiometabolic risk factors, including BP, BMI, fasting plasma glucose and total cholesterol, across 6 age groups from 25-34 to 75+ years.<sup>5</sup> Because the proportional differences between adjacent age groups were quite similar across these four risk factors, we applied the mean proportional differences in RR by age across all risk factors to the dietary RRs, anchored at the mean age at event of each diet-disease pair. In applying these to diet, we used Monte Carlo simulations to estimate the uncertainty in the age-distributed log RRs, sampling from the distribution of log RRs at the age at event. Based on 1,000 simulations, we utilized the 2.5<sup>th</sup> and 97.5<sup>th</sup> percentiles to derive the 95% uncertainty interval, hereafter described as the 95% CI. We therefore derived and utilized age-group specific RRs for diet-cardiometabolic disease

relationships based on the age patterns of RRs for metabolic risk factors and incident cardiometabolic disease events, based on established GBD methods (eTable 5).<sup>4,6</sup> Except as indicated (SSBs, sodium), we did not identify sufficient evidence for effect size modification by other factors beyond age, e.g. race, obesity, or overall diet quality.

Stroke-specific RRs were identified for ischemic and haemorrhagic stroke (eTable 5). We also accounted for deaths related to non-classifiable (other) strokes. Age-specific RRs for other stroke were estimated using the weighted average of the ischemic and haemorrhagic stroke RRs where the weights were defined as the proportion of ischaemic and haemorrhagic stroke deaths out of all observed classified stroke deaths in a given stratum. Uncertainty estimates for other stroke RRs were obtained via Monte Carlo simulations (10,000 iterations assuming independence between ischemic and hemorrhagic RR estimates). This approach renders more accurate estimations and avoids the redistribution of unclassified stroke deaths obtaining also an effect for this disease category.

### **Assessment of Validity and Bias in Etiologic Effects**

We recognized that healthful dietary factors such as fruits, vegetables, and whole grains tend to positively cluster in diets and are also often inversely correlated with less healthful dietary factors such as SSBs or processed meats. Consequently, although nearly all identified observational studies evaluating etiologic relationships utilized multivariable adjustment for major demographic factors and, in many cases, other dietary factors, we recognized that our final calculated etiologic effect sizes (RRs) from observational studies focused on one individual dietary factor might overestimate the magnitude of the etiologic effect size of any individual dietary factor, as compared with the true association when that dietary factor is consumed as part of an overall diet pattern.

To address this potential for bias from dietary pattern effects, we performed three separate sensitivity analyses, based on: (a) prospective observational studies evaluating overall dietary patterns and clinical cardiovascular events; (b) randomized controlled feeding trials evaluating overall dietary patterns and cardiovascular risk factors; and (c) a large randomized clinical trial evaluating overall dietary patterns and clinical cardiovascular events (eTable 4). For each, we compared the observed effect size of the overall dietary pattern to the estimated effect size calculated based upon our estimated RR for each individual dietary factor in that pattern. In these analyses, the identified relationships of individual dietary components were very similar to quantified effect sizes of dietary patterns in long-term observational studies, randomized feeding trials, and randomized clinical trials, suggesting that any bias, if present, is unlikely to be large.



## **TABLES**

eTable 1. Grading of evidence for etiologic relationships of specific dietary factors with cardiometabolic outcomes.<sup>1</sup>

| Dietary Factor                           | Cardiometabolic Outcome | Strength         | Consistency | Temporality | Coherence | Specificity | Analogy               | Plausibility | Biological Gradient | Experiment        |
|------------------------------------------|-------------------------|------------------|-------------|-------------|-----------|-------------|-----------------------|--------------|---------------------|-------------------|
| <b>Foods</b>                             |                         |                  |             |             |           |             |                       |              |                     |                   |
| Fruits                                   | CHD                     | +                | ++          | +++         | +++       | ++          | +++ <sup>5</sup>      | +++          | +++                 | ++ <sup>23</sup>  |
|                                          | Ischemic stroke         | ++               | +++         | +++         | +++       | ++          | +++ <sup>5</sup>      | +++          | +++                 | ++ <sup>23</sup>  |
|                                          | Hemorrhagic stroke      | +++              | +++         | +++         | +++       | ++          | +++ <sup>5</sup>      | +++          | +++                 | ++ <sup>23</sup>  |
| Vegetables                               | CHD                     | +                | ++          | +++         | +++       | ++          | +++ <sup>5</sup>      | +++          | +++                 | ++ <sup>23</sup>  |
|                                          | Ischemic stroke         | ++               | ++          | +++         | +++       | ++          | +++ <sup>5</sup>      | +++          | +++                 | ++ <sup>23</sup>  |
|                                          | Hemorrhagic stroke      | ++               | ++          | +++         | +++       | ++          | +++ <sup>5</sup>      | +++          | +++                 | ++ <sup>23</sup>  |
| Beans/legumes                            | CHD                     | +++              | +++         | +++         | +++       | +++         | +++ <sup>5</sup>      | +++          | +++                 | ++                |
| Nuts/seeds                               | CHD (fatal)             | +++              | +++         | +++         | +++       | ++          | +++ <sup>5</sup>      | +++          | +++                 | +++               |
|                                          | CHD (non-fatal)         | +++              | +++         | ++          | +++       | ++          | +++ <sup>5</sup>      | +++          | +++                 | +++               |
|                                          | Diabetes                | ++               | +++         | +++         | +++       | ++          | +++ <sup>5</sup>      | +++          | +++                 | ++                |
| Whole grains                             | CVD                     | +                | +++         | +++         | +++       | ++          | +++ <sup>6</sup>      | +++          | +++                 | +++ <sup>24</sup> |
|                                          | CHD                     | +                | +++         | +++         | +++       | ++          | +++ <sup>6</sup>      | +++          | +++                 | +++ <sup>24</sup> |
|                                          | Diabetes                | ++               | +++         | +++         | +++       | ++          | +++ <sup>6</sup>      | +++          | +++                 | +++ <sup>24</sup> |
| Red meats, unprocessed                   | Diabetes                | ++               | +++         | +++         | +++       | +++         | +++ <sup>7</sup>      | ++           | +++                 | ++                |
| Processed meats                          | CHD                     | +++              | +++         | +++         | +++       | ++          | +++ <sup>8</sup>      | +++          | +++                 | +++               |
|                                          | Diabetes                | +++              | +++         | +++         | +++       | ++          | +++ <sup>7</sup>      | ++           | +++                 | ++                |
| Yogurt                                   | Diabetes                | ++               | ++          | +++         | +++       | +++         | ++ <sup>9</sup>       | ++           | +++                 | ++ <sup>25</sup>  |
|                                          | Diabetes                | ++               | ++          | +++         | +++       | +++         | ++ <sup>9</sup>       | ++           | +++                 | ++ <sup>25</sup>  |
| Sugar-sweetened beverages                | Body mass index         | +++ <sup>4</sup> | +++         | +++         | +++       | +++         | +++ <sup>10, 11</sup> | +++          | +++                 | +++               |
|                                          | CHD                     | ++               | +++         | ++          | +++       | ++          | ++ <sup>10</sup>      | ++           | +++                 | ++                |
|                                          | Diabetes                | +++              | +++         | +++         | +++       | +++         | +++ <sup>11</sup>     | +++          | +++                 | +++               |
| <b>Nutrients</b>                         |                         |                  |             |             |           |             |                       |              |                     |                   |
| PUFAs                                    | CHD                     | +                | ++          | +++         | +++       | +++         | ++ <sup>12</sup>      | +++          | +++                 | +++               |
| Seafood ω-3s (fish/seafood) <sup>2</sup> | CHD (fatal)             | ++               | +++         | +++         | +++       | +++         | +++ <sup>13</sup>     | +++          | +++ <sup>22</sup>   | +++               |
| Trans-fats                               | CHD                     | +++              | +++         | +++         | +++       | +++         | ++ <sup>14</sup>      | +++          | +++                 | +++               |

**eTable 1. Grading of evidence for etiologic relationships of specific dietary factors on cardiometabolic outcomes (continued)**

| Dietary Factor | Cardiometabolic Outcome | Strength         | Consistency      | Temporality | Coherence | Specificity | Analogy           | Plausibility     | Biological Gradient | Experiment |
|----------------|-------------------------|------------------|------------------|-------------|-----------|-------------|-------------------|------------------|---------------------|------------|
| Dietary fiber  | CVD                     | +++              | +++              | +++         | +++       | ++          | +++ <sup>15</sup> | +++              | +++                 | +++        |
|                | CHD                     | +++              | +++              | +++         | +++       | ++          | +++ <sup>15</sup> | +++              | +++                 | +++        |
|                | Stroke                  | ++               | +++              | +++         | +++       | ++          | +++ <sup>15</sup> | +++              | +++                 | ++         |
|                | Diabetes                | ++               | +++              | +++         | +++       | ++          | +++ <sup>16</sup> | +++              | +++                 | +++        |
| Glycemic load  | CHD                     | +++ <sup>3</sup> | +++ <sup>3</sup> | +++         | +++       | ++          | ++ <sup>10</sup>  | ++               | ++ <sup>21</sup>    | ++         |
|                | Stroke                  | ++               | +++              | +++         | +++       | ++          | + <sup>17</sup>   | ++ <sup>20</sup> | ++ <sup>21</sup>    | ++         |
|                | Diabetes                | +                | ++               | +++         | +++       | ++          | +++ <sup>11</sup> | +++              | ++ <sup>21</sup>    | +++        |
| Sodium         | Systolic BP             | ++ <sup>4</sup>  | +++              | +++         | +++       | +++         | + <sup>19</sup>   | +++              | +++                 | +++        |
|                | CVD (fatal)             | ++               | ++               | +++         | +++       | ++          | +++ <sup>18</sup> | +++              | +                   | +++        |
| Potassium      | Stroke                  | ++               | +++              | +++         | +++       | +++         | +++ <sup>18</sup> | +++              | +++                 | +++        |

<sup>1</sup> To score each Bradford-Hill criterion, the following general principles were utilized, focusing on evidence from meta-analyses of prospective cohort studies and/or randomized controlled trials: +++ Consistent evidence from several well-designed studies with relatively few limitations; ++ Consistent evidence from several studies but with some important limitations; + Emerging evidence from a few studies or conflicting results from several studies; - criterion not met. Definitions for each of the nine criteria and adaptations to the general scoring system were as follows: **Strength**: magnitude of association, including RRs for protective factors of >0.9 (+), 0.8-0.89 (++) or <0.8 (+++); and for harmful factors, of <1.11 (+), 1.25 (++) and >1.25 (+++). Since magnitude is directly dependent on both the selected serving size and frequency of consumption, we utilized serving sizes most similar to standard dietary guidelines and frequencies of consumption representing modest, standardized differences in intake (e.g., 1 serving/d of fruit) that are easily communicated and could be feasibly achieved by an intervention. **Consistency**: association is repeatedly observed in different populations and circumstances, including ≥80% of included study-specific estimates being in the expected direction (+++); ≥60 - <80% (++); ≥40 - <60% (+); and <40% (not meeting criteria). **Temporality**: exposure precedes outcome. Because all evidence was based on longitudinal studies, this was a necessary criterion (+++); when relatively few overall studies were available (<5), we graded this criterion conservatively as ++. **Coherence**: interpretation of association does not conflict with known natural history and biology of the disease, for example based on pathways of disease occurrence and laboratory findings on the dietary factor. **Specificity**: exposure linked to a specific outcome. Because many nutritional factors can plausibly have diverse effects and influence multiple outcomes, scoring was based on three principles: 1) dietary factor influences a mechanism/pathways known to cause the outcome; 2) dietary factor not associated with multiple other, unrelated non-communicable diseases (e.g., multiple cancers, chronic obstructive pulmonary disease (COPD)); 3) dietary association has additional specificity within the set of cardiometabolic outcomes (coronary heart disease (CHD), stroke, diabetes mellitus). **Analogy**: based on the effects of similar factors on the disease outcome; see detailed footnotes below. **Plausibility**: association supported by one or more credible biological mechanisms. **Biological gradient**: exposure and outcome are related by a monotonic dose-response curve. **Experiment**: association is also supported by evidence from randomized controlled trials on intermediate risk factors (or, less commonly, disease outcomes) plus supportive laboratory studies.

<sup>2</sup> Given their common sources, these factors were evaluated together based on studies of fish/seafood, dietary long-chain omega-3 fats, and fish oil supplements.

<sup>3</sup> In secondary stratified analyses, +++ for women, and – for men (main effect: null).

<sup>4</sup> Effect size does not correspond to relative risk, but comparison with effect sizes on body mass index or blood pressure (BP) for other lifestyle-based interventions. For BP, the overall scored strength reflects the average of +++ for older adults, blacks, and hypertensives; and + for healthy, white, younger adults.

<sup>5</sup> Based on analogies with other minimally processed, higher fiber, phytochemical rich foods.

<sup>6</sup> Based on analogies with other less-processed foods, dietary fiber, and glycemic load.

<sup>7</sup> Based on analogies to processed meats (or unprocessed red meats), blood ferritin levels, and hemochromatosis.

<sup>8</sup> Based on analogies to sodium.

<sup>9</sup> Based on analogies to probiotics in relation to weight gain.

**eTable 1. Grading of evidence for etiologic relationships of specific dietary factors on cardiometabolic outcomes (continued)**

<sup>10</sup> Based on analogies to other poor-quality carbohydrates in relation to both CHD and weight gain.

<sup>11</sup> Based on analogies to other poor-quality carbohydrates in relation to both diabetes mellitus and weight gain.

<sup>12</sup> Based on analogies to vegetable oils in relation to CHD and cardiovascular risk factors.

<sup>13</sup> Based on analogies to fish.

<sup>14</sup> Based on analogies to other dietary fats.

<sup>15</sup> Based on analogies to other higher-quality carbohydrates and other fiber-rich foods such as nuts, fruits, and vegetables.

<sup>16</sup> Based on analogies to other higher-quality carbohydrates in relation to both diabetes mellitus and weight gain.

<sup>17</sup> Based on analogies to other poor-quality carbohydrates in relation to diabetes mellitus, and diabetes as a risk factor for stroke.

<sup>18</sup> Based on analogies to other lifestyle-related and nonlifestyle-related blood pressure interventions and to foods high in sodium (e.g., processed meats).

<sup>19</sup> Based on analogies to potassium.

<sup>20</sup> Based on insulin resistance/diabetes mellitus pathways.

<sup>21</sup> Several individual studies show dose response; no published dose-response meta-analyses.

<sup>22</sup> Between 0 and 250 mg/d; meta-analyses suggest no major additional benefits for fatal CHD above 250 mg/d.

<sup>23</sup> Because while strong and consistent evidence from trials of dietary patterns rich in fruits and vegetables, few trials separately evaluated only fruits or vegetables.

<sup>24</sup> Based on overall effects of carbohydrate quality, including studies of dietary fiber and glycemic load; much less evidence for benefits of whole grains independent of dietary fiber and glycemic load.

<sup>25</sup> Based on findings for yogurt and weight gain (animal studies, human cohorts) and for probiotics and weight gain (animal and human experiments).

**eTable 2. Estimates of etiologic effect sizes of dietary factors with risk of cardiometabolic diseases.<sup>1</sup>**

| Dietary Factor          | Outcome              | Studies in Each Meta-analysis <sup>2</sup> | Source                                                | No. of Subjects | No. of Events | Unit of RR <sup>3</sup>     | RR (95% CI) <sup>3</sup> | Statistical Heterogeneity         |
|-------------------------|----------------------|--------------------------------------------|-------------------------------------------------------|-----------------|---------------|-----------------------------|--------------------------|-----------------------------------|
| <b>Foods</b>            |                      |                                            |                                                       |                 |               |                             |                          |                                   |
| Fruits <sup>4</sup>     | ↓ CHD                | 16 cohorts (22 estimates)                  | Gan, 2015 <sup>25</sup>                               | 817,977         | 13,786        | per 1 serving/d (100 g/d)   | 0.94 (0.91, 0.98)        | I <sup>2</sup> =31.7%<br>p=0.08   |
|                         | ↓ Ischemic stroke    | 9 cohorts (10 estimates)                   | <i>De novo</i> meta-analysis <sup>5 26-33</sup>       | 329,204         | 5,517         | per 1 serving/d (100 g/d)   | 0.88 (0.83, 0.93)        | I <sup>2</sup> =77.1%<br>p<0.001  |
|                         | ↓ Hemorrhagic stroke | 5 cohorts (7 estimates)                    | <i>De novo</i> meta-analysis <sup>5 28-31</sup>       | 175,035         | 1,535         | per 1 serving/d (100 g/d)   | 0.73 (0.62, 0.87)        | I <sup>2</sup> = 81.4%<br>p<0.001 |
| Vegetables <sup>6</sup> | ↓ CHD                | 9 cohorts                                  | Gan, 2015 <sup>25</sup>                               | 761,612         | 13,135        | per 1 serving/d (100 g/d)   | 0.95 (0.92, 0.98)        | I <sup>2</sup> =35.6%<br>p=0.07   |
|                         | ↓ Ischemic stroke    | 9 cohorts (10 estimates)                   | <i>De novo</i> meta-analysis <sup>5 26-29,31-33</sup> | 329,204         | 5,515         | per 1 serving/d (100 g/d)   | 0.83 (0.75, 0.93)        | I <sup>2</sup> =89.9%<br>p<0.001  |
|                         | ↓ Hemorrhagic stroke | 5 cohorts (7 estimates)                    | <i>De novo</i> meta-analysis <sup>5 28-31,33</sup>    | 175,035         | 1,535         | per 1 serving/d (100 g/d)   | 0.83 (0.72, 0.96)        | I <sup>2</sup> =30%<br>p=0.20     |
| Beans/legumes           | ↓ CHD                | 5 cohorts                                  | Afshin, 2014 <sup>34</sup>                            | 198,904         | 6,514         | per 1 serving/d (100 g/d)   | 0.77 (0.65, 0.90)        | I <sup>2</sup> =0.2%<br>p=0.41    |
| Nuts/seeds              | ↓ CHD (fatal)        | 1 RCT and 5 cohorts                        | Afshin, 2014 <sup>34</sup>                            | 206,114         | 6,749         | per 4 servings/wk (4 oz/wk) | 0.76 (0.69, 0.84)        | I <sup>2</sup> =27.2%<br>p=0.23   |
|                         | ↓ CHD (non-fatal)    | 1 RCT and 3 cohorts                        | Afshin, 2014 <sup>34</sup>                            | 141,390         | 2,101         | per 4 servings/wk (4 oz/wk) | 0.78 (0.67, 0.92)        | I <sup>2</sup> =0.0%<br>p=0.46    |
|                         | ↓ Diabetes           | 1 RCT and 5 cohorts                        | Afshin, 2014 <sup>34</sup>                            | 230,216         | 13,308        | per 4 servings/wk (4 oz/wk) | 0.87 (0.81, 0.94)        | I <sup>2</sup> =21.6%<br>p=0.27   |
| Whole grains            | ↓ CVD                | 7 cohorts (9 estimates) <sup>7</sup>       | New GLST <sup>8</sup> of Mellen 2008 <sup>35</sup>    | 285,217         | 7,005         | per 1 serving/d (50 g/d)    | 0.91 (0.86, 0.97)        | I <sup>2</sup> =84.0%<br>P<0.001  |
|                         | ↓ CHD                | 6 cohorts                                  | New GLST <sup>8</sup> of Mellen 2008 <sup>35</sup>    | 281,633         | 4,593         | per 1 serving/d (50 g/d)    | 0.97 (0.94, 0.99)        | I <sup>2</sup> =75.5%<br>p=0.001  |
|                         | ↓ Diabetes           | 10 cohorts                                 | Aune 2013 <sup>36</sup>                               | 385,868         | 19,791        | per 1 serving/d (50 g/d)    | 0.88 (0.83, 0.93)        | I <sup>2</sup> =82%<br>p=<0.0001  |
| Red meats, unprocessed  | ↑ Diabetes           | 9 cohorts (10 estimates)                   | Pan, 2011 <sup>37</sup>                               | 442,101         | 28,228        | per 1 serving/d (100 g/d)   | 1.19 (1.04, 1.37)        | I <sup>2</sup> =93%<br>p<0.001    |

**eTable 2. Estimates of etiologic effect sizes of dietary factors with risk of cardiometabolic diseases (continued)**

| Dietary Factor                     | Outcome                                                        | Studies in Each Meta-analysis <sup>2</sup> | Source                          | No. of Subjects | No. of Events | Unit of RR <sup>3</sup>                | RR (95% CI) <sup>3</sup>            | Statistical Heterogeneity        |
|------------------------------------|----------------------------------------------------------------|--------------------------------------------|---------------------------------|-----------------|---------------|----------------------------------------|-------------------------------------|----------------------------------|
| Processed meats                    | ↑ CHD                                                          | 5 cohorts (6 estimates)                    | Micha, 2010 <sup>38</sup>       | 614,062         | 21,308        | per 1 serving/d (50 g/d)               | 1.37 (1.11, 1.68)                   | I <sup>2</sup> =76.2%<br>p=0.001 |
|                                    | ↑ Diabetes                                                     | 8 cohorts (9 estimates)                    | Pan, 2011 <sup>37</sup>         | 371,492         | 26,256        | per 1 serving/d (50 g/d)               | 1.51 (1.25, 1.83)                   | I <sup>2</sup> =94.3%<br>p<0.001 |
| Fish/Seafood <sup>9</sup>          | ↓ CHD (fatal)                                                  | 16 cohorts (17 estimates)                  | Zheng, 2012 <sup>39</sup>       | 315,812         | 4,472         | per 15 g/d (~1-100 g-serving/wk)       | 0.94 (0.90-0.98)                    | I <sup>2</sup> =63.1<br>p<0.005  |
| Yoghurt                            | ↓ Diabetes                                                     | 9 cohorts                                  | Chen, 2014 <sup>40</sup>        | 408,096         | 32,995        | per 1 serving/d (8 oz/d, 244 g/d)      | 0.82 (0.70, 0.96)                   | I <sup>2</sup> =65.3<br>p=0.003  |
| Sugar-sweetened beverages          | ↑ BMI (when baseline BMI <25 kg/m <sup>2</sup> ) <sup>10</sup> | 3 cohorts                                  | Mozaffarian, 2011 <sup>7</sup>  | 120,877         | n/a           | per 1 serving/d (8 oz/d) <sup>11</sup> | 0.10 kg/m <sup>2</sup> (0.05, 0.15) | not reported                     |
|                                    | ↑ BMI (when baseline BMI ≥25 kg/m <sup>2</sup> ) <sup>10</sup> | 3 cohorts                                  | Mozaffarian, 2011 <sup>7</sup>  | 120,877         | n/a           | per 1 serving/d (8 oz/d) <sup>11</sup> | 0.23 kg/m <sup>2</sup> (0.14, 0.32) | not reported                     |
|                                    | ↑ Diabetes (BMI-adjusted) <sup>10</sup>                        | 17 cohorts                                 | Imamura, 2015 <sup>41</sup>     | 464,937         | 38,253        | per 1 serving/d (8 oz/d) <sup>11</sup> | 1.27 (1.10, 1.46)                   | I <sup>2</sup> =73%              |
|                                    | ↑ CHD (BMI-adjusted) <sup>9</sup>                              | 4 cohort                                   | Xi, 2015 <sup>42</sup>          | 173,753         | 7,396         | per 1 serving/d (8 oz/d) <sup>11</sup> | 1.17 (1.10, 1.24)                   | I <sup>2</sup> =0%<br>p=0.79     |
| <b>Nutrients</b>                   |                                                                |                                            |                                 |                 |               |                                        |                                     |                                  |
| PUFA replacing Carbs <sup>12</sup> | ↓ CHD                                                          | 9 cohorts (12 estimates)                   | Farvid, 2014 <sup>43</sup>      | 262,612         | 12,198        | per 5 %E/d                             | 0.90 (0.85, 0.94)                   | I <sup>2</sup> =47.3% p=0.04     |
| PUFA replacing SFA <sup>12</sup>   | ↓ CHD                                                          | 8 cohorts (11 estimates)                   | Farvid, 2014 <sup>43</sup>      | 262,612         | 12,198        | per 5 %E/d                             | 0.91 (0.87, 0.96)                   | I <sup>2</sup> =55.9%<br>p=0.01  |
| Seafood omega-3 fats <sup>13</sup> | ↓ CHD (fatal)                                                  | 4 RCTs and 15 cohorts                      | Mozaffarian 2006 <sup>44</sup>  | 363,003         | 5,951         | per 100 mg/d                           | 0.85 (0.79, 0.92)                   | not reported                     |
| Trans-fats <sup>14</sup>           | ↑ CHD                                                          | 4 cohorts                                  | Mozaffarian, 2006 <sup>45</sup> | 139,836         | 4,965         | per 2% %E/d                            | 1.23 (1.11, 1.37)                   | not reported                     |
| Dietary fiber <sup>15</sup>        | ↓ CVD                                                          | 10 cohorts                                 | Threapleton, 2013 <sup>46</sup> | 1,279,690       | 19,869        | per 20 g/d                             | 0.76 (0.70, 0.84)                   | I <sup>2</sup> =45%              |

**eTable 2. Estimates of etiologic effect sizes of dietary factors with risk of cardiometabolic diseases (continued)**

| Dietary Factor              | Outcome                                                          | Studies in Each Meta-analysis <sup>2</sup> | Source                           | No. of Subjects | No. of Events | Unit of RR <sup>3</sup>         | RR (95% CI) <sup>3</sup>      | Statistical Heterogeneity        |
|-----------------------------|------------------------------------------------------------------|--------------------------------------------|----------------------------------|-----------------|---------------|---------------------------------|-------------------------------|----------------------------------|
| Glycemic load <sup>16</sup> | ↓ CHD                                                            | 12 cohorts                                 | Threapleton, 2013 <sup>46</sup>  | 1,039,572       | 11,282        | per 20 g/d                      | 0.76 (0.68, 0.85)             | I <sup>2</sup> =33%              |
|                             | ↓ Stroke                                                         | 7 cohorts                                  | Threapleton, 2013 <sup>47</sup>  | 324,640         | 9,257         | per 20 g/d                      | 0.81 (0.70, 0.95)             | I <sup>2</sup> =59%              |
|                             | ↓ Diabetes                                                       | 5 cohorts                                  | Yao, 2014 <sup>48</sup>          | 157,336         | 3,029         | per 30 g/d                      | 0.76 (0.65, 0.88)             | not reported                     |
|                             | ↑ CHD                                                            | 9 cohorts<br>(13 estimates)                | Mirrahimi, 2014 <sup>49</sup>    | 262,891         | 11,319        | high vs. low                    | 1.23 (1.06, 1.42)             | I <sup>2</sup> =52%<br>p=0.02    |
|                             | ↑ Stroke                                                         | 6 cohorts<br>(9 estimates)                 | Cai, 2015 <sup>50</sup>          | 222,308         | 2,951         | high vs. low                    | 1.19 (1.05, 1.36)             | I <sup>2</sup> = 5.0%<br>p= 0.39 |
| Sodium <sup>17, 18</sup>    | ↑ Diabetes                                                       | 17 cohorts<br>(30 estimates)               | Bhupathiraju, 2014 <sup>51</sup> | 698,589         | 46,115        | high vs. low                    | 1.13 (1.08, 1.17)             | I <sup>2</sup> =26.4%<br>p= 0.09 |
|                             | ↑ CVD (fatal)                                                    | 11 cohorts<br>(16 estimates)               | Poggio, 2015 <sup>52</sup>       | 220,249         | 9,628         | high vs. low                    | 1.12 (1.06, 1.19)             | I <sup>2</sup> =57.6%<br>p=0.002 |
|                             | ↑ SBP, main effect, white, age 50, normotensives <sup>18</sup>   | 103 RCTs<br>(107 estimates)                | Mozaffarian, 2014 <sup>8</sup>   | 6,970           | NA            | per 2,300 mg/d<br>(100 mmol/d)  | 3.74 mm Hg<br>(5.18, 2.29)    | not reported                     |
|                             | ↑ SBP, additional effect per year of age < or > 50 <sup>18</sup> |                                            |                                  |                 |               |                                 | 0.105 mm Hg<br>(0.164, 0.047) |                                  |
|                             | ↑ SBP, additional effect among Blacks <sup>18</sup>              |                                            |                                  |                 |               |                                 | 2.49 mm Hg<br>(4.85, 0.13)    |                                  |
| Potassium <sup>17</sup>     | ↑ SBP, additional effect among hypertensives <sup>18</sup>       |                                            |                                  |                 |               |                                 | 1.87 mm Hg<br>(3.63, 0.12)    |                                  |
|                             | ↓ Stroke                                                         | 9 cohorts<br>(11 estimates)                | D'Elia, 2011 <sup>53</sup>       | 233,606         | 7,066         | per 1,000 mg/d<br>(25.7 mmol/d) | 0.87 (0.79, 0.94)             | I <sup>2</sup> =55%<br>p=0.01    |

<sup>1</sup> Dietary factors with probable or convincing evidence, based on the Bradford-Hill criteria for assessing causality,<sup>11</sup> for etiologic relationships with cardiometabolic outcomes including coronary heart disease (CHD), stroke, cardiovascular disease (CVD), type 2 diabetes, body mass index (BMI), or systolic blood pressure (SBP).

<sup>2</sup> Number of estimates can be higher than the number of studies if more than one arm in a randomized controlled trial or if estimates were separately reported by sex or age in prospective cohort studies.

<sup>3</sup> Based on published or *de novo* dose-response meta-analyses of prospective cohorts or randomized trials. Meta-analyses were evaluated based on design, number of studies and events, definition of dietary exposure and disease outcomes, statistical methods, evidence of bias, and control for confounders. Relative risks (RRs) were standardized across individual studies per uniform servings of intake. When necessary, original data were extracted from individual studies to perform *de novo* dose-response meta-analyses using all available data by means of generalized least squares (GLST in STATA) for trend estimation. Effect sizes are relative risks (RRs) (95% confidence intervals (CIs)) except for sugar-sweetened beverage (SSB) effects on BMI (absolute in kg/m<sup>2</sup>) and sodium effects on SBP (absolute in mm Hg). Effect sizes correspond to the relationship between increased consumption of each dietary target per unit of RR and respective change in cardiometabolic risk (directionality in risk: ↑ increased, ↓ decreased). Proportional relationships of major risk factors with cardiometabolic outcomes vary by age, with an inverse log-linear age association.<sup>14,24</sup> We derived age specific RRs for diet-cardiometabolic disease relationships based on the age patterns of RRs for metabolic risk factors and incident cardiometabolic disease events (see Figure S2).<sup>5</sup> Except as indicated (SSBs, sodium), we did not identify sufficient evidence for effect size modification by other factors beyond age, e.g. race, obesity, or overall diet quality.

**eTable 2. Estimates of etiologic effect sizes of dietary factors with risk of cardiometabolic diseases (continued)**

<sup>4</sup> Excluding 100% juices.

<sup>5</sup> All four of these *de novo* meta-analyses were performed for consumption of fruits and vegetables and stroke subtypes due to absence of recent published meta-analyses.

<sup>6</sup> Excluding vegetable juices, starchy vegetables such as potatoes or corn, and salted or pickled vegetables. Because certain beans/legumes (e.g., black beans, lentils) were commonly included as vegetables in many of the identified studies, the etiologic relationships identified for vegetables should be considered as representing the relationships of vegetables including beans/legumes. We also evaluated etiologic relationships of beans/legumes separately.

<sup>7</sup> When a trial did not report an effect for total CVD separately (n=3 cohorts), CHD and stroke estimates from each trial were first pooled using fixed effects (n=2 cohorts), or the CHD estimate was used in place of CVD when that was the only reported outcome (n=1 cohort).

<sup>8</sup> Data were re-extracted from all original investigations identified in the meta-analysis to assess dose-response using two-step generalized least squares for trend estimation.<sup>54,55</sup>

<sup>9</sup> Etiologic relationships are limited to fatal CHD only due to absence of probable or convincing evidence for benefits on nonfatal CHD events. Benefits for were identified up to 3.5 servings/week of fish/seafood and 250 mg/d of eicosapentaenoic acid (EPA) + docosahexaenoic acid (DHA), with little evidence for additional benefits at higher intakes.

<sup>10</sup> Available evidence suggests that SSBs are associated with increased cardiometabolic risk through relationships with BMI, plus additional BMI-independent relationships of SSBs with CHD and type 2 diabetes.<sup>5,6</sup>

<sup>11</sup> Depending on study-specific assumptions, use of UK or US conversion factors, and study weighting, the serving size is in this analysis could also be 8.7-9.1 oz.

<sup>12</sup> Estimated RRs are nearly identical for polyunsaturated fats (PUFA) replacing carbohydrates (Carbs) or saturated fats (SFA).

<sup>13</sup> Linear reduction in risk observed until 250 mg/day, with little evidence for additional benefits at higher intakes.

<sup>14</sup> The overall causal effect size was based on 4 cohorts; the final RR (95% CI) used herein was very similar but based on the isocaloric replacement of trans-fats with an equal distribution of SFA, monounsaturated fats (MUFA), and PUFA based on a meta-analysis of 2 cohorts.

<sup>15</sup> Possible evidence for larger relationships at intakes above 20 g/d.

<sup>16</sup> Glycemic load is calculated as the glycemic index of a food multiplied by its carbohydrate content. Higher values reflect both higher glycemic index and higher quantities of refined grains, starches, and sugars. We also identified evidence for causal relationships of dietary fiber. Glycemic load and dietary fiber each overlap with foods in this Table including fruits, vegetables, beans/legumes, nuts/seeds, and whole grains.

<sup>17</sup> Assessed by 24h dietary recall, food frequency questionnaire, or 24h urine excretion.

<sup>18</sup> Available evidence suggests that sodium is associated with increased mortality from CHD, stroke, and other BP-related cardiovascular diseases through effects on SBP.<sup>11,55</sup> Effects of sodium on SBP, including variation by age, hypertension status, and race, were determined from randomized controlled trials. For every year above or below age 50, there was 0.105 mm Hg (95% CI: 0.047, 0.164) larger or smaller BP reduction, respectively; we assumed no further increase in effect after age 70 due to limited trial evidence outside this age range. We assumed a log-linear dose-response between SBP and CVD until 115 mm Hg, below which we assumed no further lowering of risk. Relationships CVD vs. SBP were separately identified and are not independent (i.e., relationships with CVD are at least partly mediated by SBP effects).



**eTable 3. Data sources and identified optimal intake levels of specific dietary factors associated with cardiometabolic diseases.<sup>1</sup>**

| <b>Dietary Factor</b><br>(standardized serving size)                       | <b>Observed intake levels associated with lowest disease risk in meta-analyses (health outcome)</b> | <b>Observed mean national intakes in 2010<sup>2</sup></b>                                                                                    | <b>Recommended intakes by major dietary guidelines<sup>3</sup></b>                                   | <b>Optimal mean population intake<sup>4</sup></b> |
|----------------------------------------------------------------------------|-----------------------------------------------------------------------------------------------------|----------------------------------------------------------------------------------------------------------------------------------------------|------------------------------------------------------------------------------------------------------|---------------------------------------------------|
| <b>FOODS</b>                                                               |                                                                                                     |                                                                                                                                              |                                                                                                      |                                                   |
| <b>Fruits<sup>5</sup></b><br>(100 g/serving)                               | 2.4 servings/d (CHD)<br>3.4 servings/d (ischemic stroke)<br>2.1 servings/d (hemorrhagic stroke)     | Top 3 countries:<br>Barbados: 410 g/d (4.1 servings/d)<br>Jamaica: 315 g/d (3.2 servings/d)<br>Malaysia: 299 g/d (3.0 servings/d)            | DGA 2015: 2 cups/d<br>AHA 2020: ≥4.5 cups/d (fruits and vegetables)                                  | 3 (100 g) servings/d                              |
| <b>Vegetables (including beans/legumes)<sup>6</sup></b><br>(100 g/serving) | 3.7 servings/d (CHD)<br>3.4 servings/d (ischemic stroke)<br>1.5 servings/d (hemorrhagic stroke)     | Top 3 countries:<br>Vegetables:<br>Lao PDR: 364 g/d (3.6 servings/d)<br>Bhutan: 302 g/d (3.0 servings/d)<br>Taiwan: 293 g/d (2.9 servings/d) | DGA 2015: 1.8 cups/d (excluding starchy vegetables)<br>AHA 2020: ≥4.5 cups/d (fruits and vegetables) | 4 (100 g) servings/d                              |
| <b>Beans/legumes</b><br>(100 g/serving)                                    | 4.2 servings/wk (CHD)<br>(0.6 servings/d)                                                           | Legumes:<br>Brazil: 194 g/d (1.9 servings/d)<br>Colombia: 137 g/d (1.4 servings/d)<br>Mexico: 103 g/d (1.0 serving/d)                        | DGA 2015: 1 ½ cups/wk (0.2 servings/d)                                                               | 1 (100 g) serving/d                               |
| <b>Nuts/seeds</b><br>(1 oz [28.35 g]/serving)                              | 5.0 servings/wk (fatal CHD)<br>5.2 servings/wk (non-fatal CHD)<br>4.9 servings/wk (diabetes)        | Top 3 countries:<br>Malaysia: 74 g/d (18.3 servings/wk)<br>Lebanon: 24 g/d (6.0 servings/wk)<br>UK: 15 g/d (3.7 servings/wk)                 | DGA 2015: 5 oz/wk (including soy products)<br>AHA 2020: ≥4 servings/wk <sup>7</sup>                  | 5 (1 oz) servings/wk                              |
| <b>Whole grains</b><br>(50 g/serving)                                      | 2.5 servings/d (CVD)<br>2.5 servings/d (CHD)<br>3.0 servings/d (diabetes)                           | Top 3 countries:<br>Germany: 128 g/d (2.6 servings/d)<br>Barbados: 118 g/d (2.4 servings/d)<br>Australia: 93 g/d (1.9 servings/d)            | DGA 2015: ≥3 (1 oz) servings/d (≥1.7 servings/d)<br>AHA 2020: ≥3 (1 oz) servings/d (≥1.7 servings/d) | 2.5 (50 g) servings/d                             |
| <b>Red meats, unprocessed</b><br>(100 g/serving)                           | 0.19 servings/d (diabetes)<br>(1.3 servings/wk)                                                     | Bottom 3 countries:<br>Indonesia: 12 g/d (0.8 servings/wk)<br>Armenia: 15 g/d (1.0 servings/wk)<br>Georgia: 15 g/d (1.0 servings/wk)         | DGA 2015: 26 oz/wk (lean meat, poultry and eggs) (7.4 servings/wk)                                   | 1 (100 g) serving/wk                              |
| <b>Processed meats</b><br>(50 g/serving)                                   | 0.07 serving/d (CHD)<br>(0.5 servings/wk)<br>0.11 serving/d (diabetes)<br>(0.8 servings/wk)         | Bottom 3 countries:<br>Iran: 2.5 g/d (0.4 servings/wk)<br>Korea: 3.1 g/d (0.4 servings/wk)<br>China: 3.3 g/d (0.5 servings/wk)               | DGA 2015: Choose fresh lean meat, rather than processed meat                                         | 0                                                 |

**eTable 3. Data sources and identified optimal intake levels of specific dietary factors associated with cardiometabolic diseases (continued)**

| <b>Dietary Factor</b><br>(standardized serving size)                          | <b>Observed intake levels associated with lowest disease risk in meta-analyses (health outcome)</b> | <b>Observed mean national intakes in 2010<sup>2</sup></b>                                                                                                                | <b>Recommended intakes by major dietary guidelines<sup>3</sup></b>                                                              | <b>Optimal mean population intake<sup>4</sup></b> |
|-------------------------------------------------------------------------------|-----------------------------------------------------------------------------------------------------|--------------------------------------------------------------------------------------------------------------------------------------------------------------------------|---------------------------------------------------------------------------------------------------------------------------------|---------------------------------------------------|
|                                                                               |                                                                                                     |                                                                                                                                                                          | AHA 2020: none or $\leq 2$ servings/wk                                                                                          |                                                   |
| <b>Fish/Seafood</b><br>(100 g/serving)                                        | 3 servings/wk (fatal CHD)<br>6.5 servings/wk (total stroke)                                         | Top 3 countries:<br>Japan: 105 g/d (7.4 servings/wk)<br>Korea: 73 g/d (5.1 servings/wk)<br>Iceland: 66 g/d (4.6 servings/wk)                                             | DGA 2015: 8 oz/wk (2 servings/wk)<br>AHA 2020: $\geq 2$ (3.5 oz) servings/wk (preferably oily fish) ( $\geq 2$ servings/wk)     | 3.5 (100 g) servings/wk                           |
| <b>Yoghurt</b><br>(8 oz (244 g)/serving)                                      | 2.6 servings/wk (diabetes)                                                                          | Not available                                                                                                                                                            | DGA 2015: 3 cups/d of dairy products (21 cups/wk)                                                                               | 2.5 (8 oz) servings/wk                            |
| <b>Sugar-sweetened beverages</b><br>(8 oz (236.5 g)/serving)                  | 0 servings/d (body mass index)<br>0.017 serving/d (diabetes)                                        | Bottom 3 countries:<br>China: 14 g/d (0.06 servings/d)<br>Iran: 24 g/d (0.1 servings/d)<br>Poland: 24 g/d (0.1 servings/d)                                               | DGA 2015: $<10$ %E from added sugars<br>AHA 2020: $\leq 450$ kcal (36 oz)/wk ( $\leq 0.6$ servings/d)                           | 0                                                 |
| <b><u>NUTRIENTS</u></b>                                                       |                                                                                                     |                                                                                                                                                                          |                                                                                                                                 |                                                   |
| <b>Polyunsaturated fats replacing carbohydrates or saturated fats</b><br>(%E) | 5.1 %E (CHD, cohorts)<br>14.9 %E (CHD, randomized trials)                                           | Top 3 countries, PUFA:<br>Bulgaria: 11.3 %E<br>Lebanon: 9.3 %E<br>Hungary: 8.9 %E<br><br>Bottom 3 countries, SFA:<br>Japan: 7.0 %E<br>Mexico: 7.4 %E<br>Barbados: 7.6 %E | DGA 2015: $<10$ %E from saturated fat replaced with unsaturated especially polyunsaturated fats.<br>FAO 2010: 6-11 %E from PUFA | 11 %E <sup>9</sup>                                |
| <b>Seafood omega-3 fats</b><br>(mg/d)                                         | 250 mg/d (fatal CHD)                                                                                | Top 3 countries:<br>Barbados: 1,191 mg/d<br>Iceland: 1,120 mg/d<br>Japan: 993 mg/d                                                                                       | DGA 2015: 250 mg/d <sup>8</sup>                                                                                                 | 250 mg/d                                          |
| <b>Trans-fats</b><br>(%E)                                                     | 0 %E (CHD)                                                                                          | Bottom 3 countries:<br>Barbados: 0.2 %E<br>Finland: 0.4 %E<br>Italy: 0.5 %E                                                                                              | DGA 2015: As low as possible<br>WHO: $<1$ %E <sup>56</sup>                                                                      | 0.5 %E <sup>10</sup>                              |

**eTable 3. Data sources and identified optimal intake levels of specific dietary factors associated with cardiometabolic diseases (continued)**

| <b>Dietary Factor</b><br>(standardized serving size) | <b>Observed intake levels associated with lowest disease risk in meta-analyses (health outcome)</b>                                                                                                                   | <b>Observed mean national intakes in 2010<sup>2</sup></b>                                         | <b>Recommended intakes by major dietary guidelines<sup>3</sup></b>                                                                                                       | <b>Optimal mean population intake<sup>4</sup></b> |
|------------------------------------------------------|-----------------------------------------------------------------------------------------------------------------------------------------------------------------------------------------------------------------------|---------------------------------------------------------------------------------------------------|--------------------------------------------------------------------------------------------------------------------------------------------------------------------------|---------------------------------------------------|
| <b>Dietary fiber</b><br>(g/d)                        | 23.8 g/d (CVD)<br>22.8 g/d (CHD)<br>19.4 g/d (stroke)<br>30.0 g/d (diabetes)                                                                                                                                          | Top 3 countries:<br>Barbados: 28 g/d<br>Mexico: 26 g/d<br>Bulgaria: 25 g/d                        | DGA 2015: 22.4-33.6 g/d<br>(depending on gender & age group)                                                                                                             | 30 g/d                                            |
| <b>Sodium</b><br>(mg/d)                              | 614 mg/d (lower SBP) <sup>11 57</sup><br>1,500 mg/d (reduced BP in randomized trials) <sup>58</sup><br>1,787 mg/d (CHD mortality) <sup>59</sup><br>2,245 mg/d (stroke mortality) <sup>59</sup><br>2,391 mg/d (stroke) | 5 nations with mean intakes at or below 2,000 mg/d: Jamaica, Colombia, South Africa, Mexico, Iran | UK NICE: <1,200 mg/d <sup>60</sup><br>AHA 2020: <1,500 mg/d <sup>61</sup><br>WHO: 2,000 mg/d <sup>62</sup><br>DGA 2015: <2,300 mg/d<br>UK FSA: <2,400 mg/d <sup>63</sup> | 2,000 mg/d <sup>12</sup>                          |
| <b>Potassium</b><br>(mg/d)                           | 4,136 mg/d (stroke)                                                                                                                                                                                                   | Not available                                                                                     | DGA 2015: 4,700 mg/d<br>WHO: ≥3,500 mg/d <sup>64</sup>                                                                                                                   | 4,500 mg/d                                        |

<sup>1</sup> Building up on our work in the 2010 Nutrition and Chronic Diseases Expert Group (NutriCoDE) in which we evaluated optimal intake levels for cardiometabolic outcomes including coronary heart disease (CHD), stroke, type 2 diabetes, body mass index (BMI), and systolic blood pressure (SBP).<sup>9</sup>

<sup>2</sup> Based on nationally representative, individual-level dietary surveys using optimal dietary metrics among both adult men and women in our 2010 NutriCoDE Global Dietary Database<sup>65-69</sup> and other sources;<sup>70</sup> adjusted to 2,000 kcal/d.

<sup>3</sup> For an average intake of 2,000 kcal/d.

<sup>4</sup> For an average energy intake of 2,000 kcal/d. The optimal mean levels for the population were determined based on risk (observed levels at which lowest disease risk occurs), feasibility (observed national consumption levels globally), and consistency (with other assessments in major dietary guidelines).<sup>23,24</sup> The plausible population distribution of consumption (SD) around the optimal population mean was determined to be ±10% of the mean, based on the average SD for diet-related metabolic risk factors.<sup>3,25-28</sup> We could not comparably identify optimal intake levels of glycemic load due to absence of global data on mean intakes in most nations and of recommended levels in major dietary guidelines.

<sup>5</sup> Excluding 100% juices.

<sup>6</sup> Excluding vegetable juices, starchy vegetables such as potatoes or corn, and salted or pickled vegetables.

<sup>7</sup> Including beans/legumes.

<sup>8</sup> Based on eicosapentaenoic acid (EPA) + docosahexaenoic acid (DHA) in common fish varieties, the DGA 2015 calculates that 1,750 mg/wk (250 mg/d) would be in concordance with the recommended fish intake of 8 oz/wk.

<sup>9</sup> 12 %E in earlier analyses.<sup>4,67,71</sup> Lowered to 11% based on the present updated review of available evidence on optimal levels and considering observed national intakes and major dietary guidelines.

<sup>10</sup> Non-zero value to account for natural ruminant sources, for which probable or convincing evidence of causal effects on cardiometabolic outcomes was not identified.

<sup>11</sup> Based on ecologic evidence; these values are the mean 24-hour urine sodium excretion across the 4 populations with lowest levels (Brazil, Yanomano and Xingu, Papua New Guinea, Kenya) in the Intersalt Study.<sup>57</sup>

<sup>12</sup> As previously described in detail, we did not incorporate a potential U-shaped relationship with risk due to the linear dose-response effect of dietary sodium on BP, the log-linear effect of BP on cardiovascular disease (CVD), the absence of plausible biologic rationale for increased risk with sodium reduction, at least to 2,000 mg/d, and the plausible source of bias that could explain the U-shaped relationships observed in some, but not all, prior observational studies.<sup>8</sup>

AHA 2020, American Heart Association 2020 Strategic Impact Goals;<sup>72</sup> DGA, Dietary Guidelines for Americans;<sup>73</sup> FAO, United Nations Food and Agricultural Organization;<sup>74</sup> PUFA, Polyunsaturated fats; SFA, Saturated fats; UK FSA, Food Standards Agency; UK NICE, UK National Institute for Health and Clinical Excellence; WHO, World Health Organization.

**eTable 4. Validity analyses comparing the observed relative risks for CHD based on evidence from prospective observational studies and randomized trials of dietary patterns versus the estimated relative risks for CHD based on the present analysis of individual dietary components.**

|                                                                                                                           | Observed Relative Risk<br>for CHD <sup>1</sup> | Estimated Relative Risk<br>for CHD <sup>2</sup> |
|---------------------------------------------------------------------------------------------------------------------------|------------------------------------------------|-------------------------------------------------|
| <b>Prospective cohort studies evaluating associations of overall dietary patterns with incident CHD <sup>3</sup></b>      |                                                |                                                 |
| Health Professionals Study – Prudent diet (average of all quintiles, with lowest quintile as the reference) <sup>75</sup> | 0.82                                           | 0.78                                            |
| Health Professionals Study – Western diet (average of all quintiles, with lowest quintile as the reference) <sup>75</sup> | 1.29                                           | 1.17                                            |
| Nurse’s Health Study – Prudent diet (average of all quintiles, with lowest quintile as the reference) <sup>76</sup>       | 0.82                                           | 0.80                                            |
| Nurse’s Health Study – Western diet (average of all quintiles, with lowest quintile as the reference) <sup>76</sup>       | 1.20                                           | 1.10                                            |
| Nurse’s Health Study – Mediterranean diet (average of all quintiles, with lowest quintile as the reference) <sup>77</sup> | 0.84                                           | 0.81                                            |
| EPIC-Greek (per 2 units diet score increase) <sup>78</sup>                                                                | 0.78                                           | 0.90                                            |
| SUN-Spain (per 2 units diet score increase) <sup>79</sup>                                                                 | 0.74                                           | 0.75                                            |
| <b>Randomized controlled feeding trials evaluating effects of overall dietary patterns on BP and LDL-C <sup>4</sup></b>   |                                                |                                                 |
| Fruits, serving/d (100 g/d)                                                                                               | 0.93                                           | 0.94                                            |
| Vegetables, serving/d (100 g/d)                                                                                           | 0.93                                           | 0.95                                            |
| Nuts and seeds, serving/wk (1 oz [28.35 g]/wk)                                                                            | 0.93                                           | 0.93                                            |
| Whole grains, serving/d (50 g/d)                                                                                          | 0.88                                           | 0.97                                            |
| Fish, serving/d (100 g/d)                                                                                                 | 0.87                                           | 0.66                                            |
| Red meat, serving/d (100 g/d)                                                                                             | 1.17                                           | 1.17                                            |
| Dietary fiber, 20 g/d                                                                                                     | 0.77                                           | 0.76                                            |
| <b>Randomized clinical trial evaluating effects of an overall dietary pattern on incident CHD <sup>5</sup></b>            |                                                |                                                 |
| Mediterranean diet + extra-virgin olive oil vs. placebo                                                                   | 0.80                                           | 0.77                                            |
| Mediterranean diet + mixed nuts vs. placebo                                                                               | 0.74                                           | 0.62                                            |
| Combined groups                                                                                                           | 0.77                                           | 0.69                                            |

<sup>1</sup> Values are the observed relative risks (RRs) in these long-term prospective observational studies or randomized trials of dietary patterns.

<sup>2</sup> Values are the estimated RRs based on the reported differences in intakes of individual dietary factors across each category of the diet pattern study and our estimated quantitative effect sizes for these individual dietary factors (Table 1), assuming a multiplicative relation of proportional effects of individual components. Not all dietary factors in Table 1 were included due to insufficient reporting of differences in these components across studies of dietary patterns. We focused on foods and excluded overlapping nutrients (e.g., we included whole grains, fruits, and vegetables; and excluded fiber, glycemic load). We also assumed no benefits from differences in other dietary factors (e.g., coffee) in the dietary pattern for which we had not determined a causal etiologic relationship.

<sup>3</sup> Because the observed relative risks in most of these cohorts were based on serial dietary measures with time-varying updating, the predicted relative risks for each dietary factor were adjusted for comparability for regression dilution bias due to the observed changes over time of each dietary factor in these cohorts.

<sup>4</sup> For randomized controlled feeding trials of dietary patterns and cardiovascular risk factors, we performed inverse-variance-weighted meta-regression across all of the treatment arms of three large, well-established dietary pattern trials<sup>58,80,81</sup> to estimate the independent effects of five different dietary components, when consumed as part of an overall dietary pattern, on systolic blood pressure (SBP) and LDL-cholesterol (LDL-C). We evaluated achieved dietary changes in fruits, vegetables, nuts, whole grains, and fish simultaneously as independent variables in the meta-regression, with changes in SBP or LDL-C as

**eTable 4. Validity analyses comparing the observed relative risks for CHD based on evidence from prospective observational studies and randomized trials of dietary patterns versus the estimated relative risks for CHD based on the present analysis of individual dietary components (continued)**

the dependent variable. For each dietary factor, we then calculated how the identified change in SBP and LDL-C from the meta-regression would alter cardiovascular risk, based on the established relationship between SBP and LDL-C and clinical events,<sup>17,21,24,82,83</sup> assuming independent, multiplicative effects of SBP and LDL-C on risk. These observed effects, calculated based only on how each dietary factor altered SBP and LDL-C in randomized controlled feeding trials of diet patterns, were then compared to our estimated etiologic relationship with coronary heart disease (CHD) events for that dietary factor (Table 1).

<sup>5</sup> We compared the observed vs. predicted risk in a large randomized clinical trial evaluating the effects of two overall dietary patterns on incidence of cardiovascular events.<sup>84</sup> A similar analysis was previously reported using 2010 NutriCode RR's;<sup>85</sup> the values here are based on the updated RR's in the current investigation (Table 1). The predicted risk reductions were calculated by combining the observed differences in individual dietary components achieved in the trial with our estimated quantitative effects, assuming multiplicative effects of each individual component. Because we had not identified sufficient studies to quantify etiologic relationships of extra-virgin olive oil, to enable comparison we imputed potential relationships of extra-virgin olive oil from our estimated relative risk for polyunsaturated vegetable fats.

**eTable 5. Dietary factors having probable or convincing evidence for causal relationships with cardiometabolic outcomes and standardized magnitudes of effect sizes.**

| Dietary Targets <sup>a</sup>    | Cardiometabolic Outcome               | No. of Studies in Each Meta-analysis                                     | Unit of RR <sup>b</sup> | Relative Risk by Age (RR, 95% CIs) <sup>c</sup> |                                     |                                     |                                     |                                     |                                     |
|---------------------------------|---------------------------------------|--------------------------------------------------------------------------|-------------------------|-------------------------------------------------|-------------------------------------|-------------------------------------|-------------------------------------|-------------------------------------|-------------------------------------|
|                                 |                                       |                                                                          |                         | 25-34 y                                         | 35-44 y                             | 45-54 y                             | 55-64 y                             | 65-74 y                             | 75+ y                               |
| <b>Fruits (g/d)</b>             | ↓ CHD                                 | 16 cohorts (22 estimates)                                                | per 1 serving (100 g)/d | 0.92 (0.87, 0.97)                               | 0.92 (0.87, 0.97)                   | 0.93 (0.89, 0.97)                   | 0.94 (0.91, 0.98)                   | 0.95 (0.92, 0.98)                   | 0.97 (0.96, 0.99)                   |
|                                 | ↓ Ischemic stroke                     | 9 cohorts (10 estimates)                                                 |                         | 0.83 (0.76, 0.90)                               | 0.83 (0.77, 0.90)                   | 0.86 (0.80, 0.92)                   | 0.88 (0.83, 0.93)                   | 0.90 (0.86, 0.94)                   | 0.94 (0.92, 0.96)                   |
|                                 | ↓ Hemorrhagic stroke                  | 5 cohorts (7 estimates)                                                  |                         | 0.63 (0.49, 0.81)                               | 0.64 (0.5, 0.82)                    | 0.69 (0.56, 0.84)                   | 0.73 (0.61, 0.87)                   | 0.77 (0.67, 0.89)                   | 0.86 (0.8, 0.92)                    |
| <b>Vegetables (g/d)</b>         | ↓ CHD                                 | 9 cohorts (9 estimates)                                                  | per 1 serving (100 g)/d | 0.93 (0.89, 0.97)                               | 0.93 (0.9, 0.97)                    | 0.94 (0.91, 0.97)                   | 0.95 (0.93, 0.98)                   | 0.96 (0.94, 0.98)                   | 0.98 (0.97, 0.99)                   |
|                                 | ↓ Ischemic stroke                     | 9 cohorts (10 estimates)                                                 |                         | 0.76 (0.64, 0.9)                                | 0.77 (0.66, 0.9)                    | 0.8 (0.7, 0.92)                     | 0.83 (0.74, 0.93)                   | 0.86 (0.78, 0.94)                   | 0.92 (0.87, 0.96)                   |
|                                 | ↓ Hemorrhagic stroke                  | 5 cohorts (7 estimates)                                                  |                         | 0.76 (0.61, 0.95)                               | 0.77 (0.62, 0.95)                   | 0.80 (0.67, 0.96)                   | 0.83 (0.72, 0.96)                   | 0.86 (0.76, 0.97)                   | 0.92 (0.86, 0.97)                   |
| <b>Nuts/seeds (g/d)</b>         | ↓ CHD (fatal)                         | 5 cohorts, 1 RCT (6 estimates)                                           | per 1 serving (oz)/ wk  | 0.89 (0.85, 0.93)                               | 0.89 (0.85, 0.93)                   | 0.91 (0.87, 0.94)                   | 0.92 (0.89, 0.95)                   | 0.93 (0.91, 0.96)                   | 0.96 (0.95, 0.97)                   |
|                                 | ↓ Diabetes                            | 5 cohorts, 1 RCT (6 estimates)                                           |                         | 0.95 (0.92, 0.98)                               | 0.95 (0.93, 0.98)                   | 0.96 (0.94, 0.98)                   | 0.97 (0.95, 0.98)                   | 0.97 (0.96, 0.99)                   | 0.98 (0.98, 0.99)                   |
| <b>Whole grains (g/d)</b>       | ↓ CHD                                 | 6 cohorts (6 estimates)                                                  | per 1 serving (50 g)/d  | 0.95 (0.91, 0.99)                               | 0.95 (0.92, 0.99)                   | 0.96 (0.93, 0.99)                   | 0.97 (0.94, 0.99)                   | 0.97 (0.95, 0.99)                   | 0.98 (0.97, 0.99)                   |
|                                 | ↓ Ischemic stroke <sup>d</sup>        | 7 cohorts (9 estimates)                                                  |                         | 0.88 (0.80, 0.96)                               | 0.88 (0.81, 0.96)                   | 0.90 (0.83, 0.97)                   | 0.91 (0.86, 0.97)                   | 0.93 (0.88, 0.98)                   | 0.96 (0.93, 0.98)                   |
|                                 | ↓ Hemorrhagic stroke <sup>d</sup>     | 7 cohorts (9 estimates)                                                  |                         | 0.88 (0.80, 0.96)                               | 0.88 (0.81, 0.96)                   | 0.90 (0.83, 0.97)                   | 0.91 (0.86, 0.97)                   | 0.93 (0.88, 0.98)                   | 0.96 (0.93, 0.98)                   |
|                                 | ↓ Diabetes                            | 10 cohorts (10 estimates)                                                |                         | 0.83 (0.76, 0.90)                               | 0.83 (0.77, 0.90)                   | 0.86 (0.80, 0.92)                   | 0.88 (0.83, 0.93)                   | 0.90 (0.86, 0.94)                   | 0.94 (0.92, 0.96)                   |
| <b>Red meats (g/d)</b>          | ↑ Diabetes                            | 9 cohorts (10 estimates)                                                 | per 1 serving (100 g)/d | 1.3 (1.05, 1.60)                                | 1.29 (1.05, 1.57)                   | 1.24 (1.04, 1.47)                   | 1.19 (1.03, 1.37)                   | 1.16 (1.03, 1.30)                   | 1.09 (1.02, 1.15)                   |
| <b>Processed meats (g/d)</b>    | ↑ CHD                                 | 5 cohorts (6 estimates)                                                  | per 1 serving (50 g)/d  | 1.62 (1.17, 2.18)                               | 1.58 (1.16, 2.11)                   | 1.47 (1.14, 1.88)                   | 1.38 (1.11, 1.69)                   | 1.30 (1.09, 1.54)                   | 1.16 (1.07, 1.27)                   |
|                                 | ↑ Diabetes                            | 8 cohorts (9 estimates)                                                  |                         | 1.86 (1.38, 2.46)                               | 1.81 (1.36, 2.37)                   | 1.65 (1.30, 2.08)                   | 1.52 (1.24, 1.83)                   | 1.41 (1.20, 1.65)                   | 1.22 (1.12, 1.32)                   |
| <b>SSBs (servings (8 oz)/d)</b> | ↑ BMI (baseline BMI <25) <sup>e</sup> | Original meta-analysis of 3 US prospective cohorts (NHS I, NHS II, HPFS) | per 1 serving (8 oz)/d  | 0.10 kg/m <sup>2</sup> (0.05, 0.15)             | 0.10 kg/m <sup>2</sup> (0.05, 0.15) | 0.10 kg/m <sup>2</sup> (0.05, 0.15) | 0.10 kg/m <sup>2</sup> (0.05, 0.15) | 0.10 kg/m <sup>2</sup> (0.05, 0.15) | 0.10 kg/m <sup>2</sup> (0.05, 0.15) |
|                                 | ↑ BMI (baseline BMI ≥25) <sup>e</sup> |                                                                          |                         | 0.23 kg/m <sup>2</sup> (0.14, 0.32)             | 0.23 kg/m <sup>2</sup> (0.14, 0.32) | 0.23 kg/m <sup>2</sup> (0.14, 0.32) | 0.23 kg/m <sup>2</sup> (0.14, 0.32) | 0.23 kg/m <sup>2</sup> (0.14, 0.32) | 0.23 kg/m <sup>2</sup> (0.14, 0.32) |

**eTable 5. Dietary factors having probable or convincing evidence for causal relationships with cardiometabolic outcomes and standardized magnitudes of effect sizes (continued)**

| Dietary Targets <sup>a</sup>                  | Cardiometabolic Outcome                                   | No. of Studies in Each Meta-analysis                                   | Unit of RR <sup>b</sup>                 | Relative Risk by Age (RR, 95% CIs) <sup>c</sup> |                            |                            |                            |                            |                            |
|-----------------------------------------------|-----------------------------------------------------------|------------------------------------------------------------------------|-----------------------------------------|-------------------------------------------------|----------------------------|----------------------------|----------------------------|----------------------------|----------------------------|
|                                               |                                                           |                                                                        |                                         | 25-34 y                                         | 35-44 y                    | 45-54 y                    | 55-64 y                    | 65-74 y                    | 75+ y                      |
|                                               | CHD-BMI mediated <sup>e</sup>                             | pooled analysis of APCSC, PSC, and ERFC international pooling projects | per 5 kg/m <sup>2</sup> increase in BMI | 1.79<br>(1.56, 2.06)                            | 1.66<br>(1.51, 1.84)       | 1.55<br>(1.46, 1.64)       | 1.44<br>(1.4, 1.48)        | 1.35<br>(1.32, 1.38)       | 1.19<br>(1.13, 1.25)       |
|                                               | HHD-BMI mediated <sup>e</sup>                             |                                                                        | 2.30<br>(0.66, 7.95)                    | 2.15<br>(0.80, 5.78)                            | 2.02<br>(0.97, 4.21)       | 1.90<br>(1.17, 3.07)       | 1.81<br>(1.45, 2.26)       | 1.54<br>(1.20, 1.97)       |                            |
|                                               | Ischemic stroke-BMI mediated <sup>e</sup>                 |                                                                        | 2.09<br>(1.81, 2.40)                    | 1.86<br>(1.67, 2.08)                            | 1.67<br>(1.53, 1.81)       | 1.50<br>(1.40, 1.6)        | 1.35<br>(1.28, 1.41)       | 1.11<br>(1.06, 1.15)       |                            |
|                                               | Hemorrhagic stroke-BMI mediated <sup>e</sup>              |                                                                        | 3.04<br>(2.24, 4.11)                    | 2.54<br>(1.96, 3.28)                            | 2.10<br>(1.66, 2.66)       | 1.75<br>(1.44, 2.13)       | 1.48<br>(1.29, 1.71)       | 1.13<br>(1.03, 1.23)       |                            |
|                                               | Diabetes-BMI mediated <sup>e</sup>                        |                                                                        | 3.55<br>(2.41, 5.23)                    | 3.07<br>(2.28, 4.15)                            | 2.66<br>(2.15, 3.30)       | 2.32<br>(2.04, 2.63)       | 2.03<br>(1.95, 2.11)       | 1.52<br>(1.40, 1.65)       |                            |
|                                               | ↑ CHD-BMI adjusted <sup>e</sup>                           |                                                                        | 4 cohorts (4 estimates)                 | per 1 serving (8 oz)/d                          | 1.33<br>(1.19, 1.47)       | 1.31<br>(1.18, 1.45)       | 1.26<br>(1.15, 1.37)       | 1.21<br>(1.13, 1.3)        | 1.17<br>(1.10, 1.24)       |
|                                               | ↑ Diabetes-BMI adjusted <sup>e</sup>                      | 17 cohorts (17 estimates)                                              |                                         | 1.35<br>(1.14, 1.59)                            | 1.33<br>(1.13, 1.56)       | 1.27<br>(1.11, 1.46)       | 1.22<br>(1.09, 1.36)       | 1.18<br>(1.07, 1.29)       | 1.10<br>(1.05, 1.15)       |
|                                               | ↑ Diabetes-BMI unadjusted <sup>e</sup>                    | 13 cohorts (13 estimates)                                              |                                         | 1.55<br>(1.25, 1.89)                            | 1.52<br>(1.24, 1.85)       | 1.43<br>(1.20, 1.68)       | 1.34<br>(1.17, 1.54)       | 1.28<br>(1.14, 1.43)       | 1.15<br>(1.09, 1.22)       |
| <b>PUFA replacing Carbs (% E)<sup>g</sup></b> | ↓ CHD                                                     | 9 cohorts (12 estimates)                                               | per 5 %E/d                              | 0.86<br>(0.79, 0.92)                            | 0.86<br>(0.8, 0.93)        | 0.88<br>(0.83, 0.94)       | 0.90<br>(0.86, 0.95)       | 0.92<br>(0.88, 0.96)       | 0.95<br>(0.93, 0.97)       |
| <b>PUFA replacing SFA (% E)<sup>g</sup></b>   | ↓ CHD                                                     | 8 cohorts (11 estimates)                                               | per 5 %E/d                              | 0.87<br>(0.81, 0.93)                            | 0.87<br>(0.82, 0.94)       | 0.89<br>(0.84, 0.95)       | 0.91<br>(0.87, 0.95)       | 0.92<br>(0.89, 0.96)       | 0.96<br>(0.94, 0.98)       |
| <b>SFA replacing PUFA (% E)<sup>g</sup></b>   | ↑ CHD                                                     | 8 cohorts (11 estimates)                                               | per 5 %E/d                              | 1.15<br>(1.07, 1.24)                            | 1.14<br>(1.06, 1.23)       | 1.12<br>(1.05, 1.19)       | 1.10<br>(1.05, 1.15)       | 1.08<br>(1.04, 1.13)       | 1.05<br>(1.02, 1.07)       |
| <b>Seafood ω-3 fats (mg/d)</b>                | ↓ CHD                                                     | 4 RCTs and 15 cohorts (19 estimates)                                   | per 100 mg/d                            | 0.79<br>(0.70, 0.88)                            | 0.80<br>(0.71, 0.89)       | 0.82<br>(0.75, 0.90)       | 0.85<br>(0.79, 0.92)       | 0.87<br>(0.82, 0.93)       | 0.93<br>(0.90, 0.96)       |
| <b>Sodium (mg/d)</b>                          | ↑ SBP, main effect, white, normotensive <sup>g</sup>      | 103 RCTs (107 estimates)                                               | per 2300 mg/d                           | 1.64 mm Hg<br>(-0.19, 3.46)                     | 2.69 mm Hg<br>(1.15, 4.23) | 3.74 mm Hg<br>(2.30, 5.17) | 4.79 mm Hg<br>(3.25, 6.33) | 5.84 mm Hg<br>(4.01, 7.66) | 5.84 mm Hg<br>(4.01, 7.66) |
|                                               | ↑ SBP, additional effect among Blacks <sup>g</sup>        |                                                                        |                                         | 2.49 mm Hg (0.13, 4.85)                         | 2.49 mm Hg (0.13, 4.85)    | 2.49 mm Hg (0.13, 4.85)    | 2.49 mm Hg (0.13, 4.85)    | 2.49 mm Hg (0.13, 4.85)    | 2.49 mm Hg (0.13, 4.85)    |
|                                               | ↑ SBP, additional effect among hypertensives <sup>g</sup> |                                                                        |                                         | 1.87 mm Hg (0.12, 3.63)                         | 1.87 mm Hg (0.12, 3.63)    | 1.87 mm Hg (0.12, 3.63)    | 1.87 mm Hg (0.12, 3.63)    | 1.87 mm Hg (0.12, 3.63)    | 1.87 mm Hg (0.12, 3.63)    |
|                                               | CHD-SBP mediated <sup>g</sup>                             | pooled analysis of APCSC and PSC                                       | per 10 mmHg increase in SBP             | 1.81<br>(1.29, 2.56)                            | 1.68<br>(1.29, 2.20)       | 1.56<br>(1.29, 1.89)       | 1.45<br>(1.29, 1.62)       | 1.33<br>(1.29, 1.38)       | 1.18<br>(1.09, 1.28)       |

**eTable 5. Dietary factors having probable or convincing evidence for causal relationships with cardiometabolic outcomes and standardized magnitudes of effect sizes (continued)**

| Dietary Targets <sup>a</sup> | Cardiometabolic Outcome                                        | No. of Studies in Each Meta-analysis | Unit of RR <sup>b</sup> | Relative Risk by Age (RR, 95% CIs) <sup>c</sup> |                      |                      |                      |                      |                      |  |
|------------------------------|----------------------------------------------------------------|--------------------------------------|-------------------------|-------------------------------------------------|----------------------|----------------------|----------------------|----------------------|----------------------|--|
|                              |                                                                |                                      |                         | 25-34 y                                         | 35-44 y              | 45-54 y              | 55-64 y              | 65-74 y              | 75+ y                |  |
|                              |                                                                | international pooling projects       |                         |                                                 |                      |                      |                      |                      |                      |  |
|                              | HHD-SBP mediated <sup>g</sup>                                  |                                      |                         | 3.29<br>(3.00, 3.60)                            | 2.86<br>(2.67, 3.06) | 2.49<br>(2.37, 2.61) | 2.16<br>(2.09, 2.24) | 1.88<br>(1.82, 1.94) | 1.47<br>(1.42, 1.53) |  |
|                              | RHD-SBP mediated <sup>g</sup>                                  |                                      |                         | 1.28<br>(1.11, 1.47)                            | 1.24<br>(1.11, 1.38) | 1.20<br>(1.11, 1.30) | 1.17<br>(1.11, 1.23) | 1.13<br>(1.09, 1.18) | 1.08<br>(1.03, 1.12) |  |
|                              | CMM-SBP mediated <sup>g</sup>                                  |                                      |                         | 1.51<br>(1.39, 1.64)                            | 1.44<br>(1.35, 1.54) | 1.37<br>(1.31, 1.43) | 1.30<br>(1.26, 1.34) | 1.24<br>(1.21, 1.28) | 1.14<br>(1.11, 1.17) |  |
|                              | AF-SBP mediated <sup>g</sup>                                   |                                      |                         | 1.51<br>(1.39, 1.64)                            | 1.44<br>(1.35, 1.54) | 1.37<br>(1.31, 1.43) | 1.30<br>(1.26, 1.34) | 1.24<br>(1.21, 1.28) | 1.14<br>(1.11, 1.17) |  |
|                              | AA-SBP mediated <sup>g</sup>                                   |                                      |                         | 1.62<br>(1.45, 1.80)                            | 1.53<br>(1.40, 1.66) | 1.44<br>(1.36, 1.53) | 1.36<br>(1.31, 1.42) | 1.29<br>(1.25, 1.32) | 1.16<br>(1.12, 1.20) |  |
|                              | PVD-SBP mediated <sup>g</sup>                                  |                                      |                         | 1.51<br>(1.39, 1.64)                            | 1.44<br>(1.35, 1.54) | 1.37<br>(1.31, 1.43) | 1.30<br>(1.26, 1.34) | 1.24<br>(1.21, 1.28) | 1.14<br>(1.11, 1.17) |  |
|                              | Endocarditis-SBP mediated <sup>g</sup>                         |                                      |                         | 1.45<br>(1.26, 1.67)                            | 1.39<br>(1.24, 1.55) | 1.33<br>(1.22, 1.44) | 1.27<br>(1.20, 1.34) | 1.21<br>(1.17, 1.26) | 1.12<br>(1.07, 1.17) |  |
|                              | Other cardiovascular and circulatory-SBP mediated <sup>g</sup> |                                      |                         | 1.51<br>(1.39, 1.64)                            | 1.44<br>(1.35, 1.54) | 1.37<br>(1.31, 1.43) | 1.30<br>(1.26, 1.34) | 1.24<br>(1.21, 1.28) | 1.14<br>(1.11, 1.17) |  |
|                              | Ischemic stroke-SBP mediated <sup>g</sup>                      |                                      |                         | 2.30<br>(2.07, 2.56)                            | 2.05<br>(1.89, 2.22) | 1.83<br>(1.72, 1.93) | 1.63<br>(1.57, 1.69) | 1.44<br>(1.39, 1.50) | 1.17<br>(1.13, 1.22) |  |
|                              | Hemorrhagic stroke-SBP mediated <sup>g</sup>                   |                                      |                         | 2.25<br>(1.67, 3.04)                            | 2.11<br>(1.50, 2.98) | 1.89<br>(1.43, 2.51) | 1.66<br>(1.39, 1.98) | 1.46<br>(1.36, 1.57) | 1.19<br>(1.08, 1.3)  |  |

<sup>a</sup> Dietary factors with probable or convincing evidence, based on criteria for assessing causality,<sup>11,13,14,86</sup> for etiologic relationships with cardiometabolic outcomes including coronary heart disease (CHD), stroke, type 2 diabetes, body mass index (BMI), or systolic blood pressure (SBP).<sup>9,10</sup> Trans fats were not assessed due to limited national data on intakes as well as rapidly declining levels due to policy interventions. Dietary fiber was not included in the present analysis due to its overlap with its major food sources including fruits, vegetables, legumes, and whole grains.

<sup>b</sup> Associations with cardiometabolic outcomes were based on published or de novo meta-analyses of prospective cohorts or randomized clinical trials. Meta-analyses were evaluated based on design, number of studies and events, definition of dietary exposure and disease outcomes, statistical methods, evidence of bias, and control for confounders.<sup>10</sup> Relative risks (RRs) were standardized across individual studies per uniform servings of intake. No differential associations with incidence versus case-specific mortality were assumed; thus, for a given diet-disease relationship incidence estimates were used as a proxy, if mortality estimates were unavailable. We focused on dose-response meta-analyses. When necessary, original data were extracted from individual studies within each meta-analysis to perform de novo dose-response meta-analyses using all available data by means of generalized least squares (GLST) for trend estimation.

<sup>c</sup> Effect sizes are relative risks (RRs) (95% confidence intervals (CIs)) except for sugar-sweetened beverage (SSB) effects on BMI (absolute in kg/m<sup>2</sup>) and sodium effects on SBP (absolute in mm Hg). Effect sizes correspond to the relationship between increased consumption of each dietary target per unit of RR and respective change in cardiometabolic risk (directionality in risk: ↑ increased, ↓ decreased). Most meta-analyses did not stratify by sex, and those that did found no significant differences in proportional relationships of dietary factors between men and women; in addition, the proportional relationships of most metabolic risk factors with chronic diseases appear similar by sex.<sup>16-24</sup> Thus, we incorporated similar proportional effect sizes (RRs) of dietary factors by sex. Conversely, our own and others' work has demonstrated that proportional relationships of major risk factors with cardiometabolic diseases vary by age, with an inverse log-linear age association.<sup>4,5</sup> We therefore derived and utilized age-group specific RRs for diet-CMD relationships based on the age patterns of RRs for metabolic risk factors and incident cardiometabolic



**eTable 5. Dietary factors having probable or convincing evidence for causal relationships with cardiometabolic outcomes and standardized magnitudes of effect sizes (continued)**

events, based on established Global Burden of Disease (GBD) methods.<sup>4,5</sup> Except as indicated (SSBs, sodium), we did not identify sufficient evidence for effect size modification by other factors beyond age, e.g. race, obesity, or overall diet quality.

<sup>d</sup> The RR on CVD from a de novo dose-response meta-analysis was used for ischemic and hemorrhagic stroke (similar to the RR on total stroke, which was based on a limited number of cohorts and events).<sup>10</sup>

<sup>e</sup> Consistent with GBD and available evidence for harms of high BMI on specific cardiometabolic outcomes the relationships of high intake of SSBs with CHD, hypertensive heart disease (HHD), ischemic stroke, hemorrhagic stroke (only when BMI  $\geq 25$  kg/m<sup>2</sup>), and diabetes were estimated through their measured relationships with BMI (i.e., as mediated by BMI relationships).<sup>5,6</sup> Direct relationships with BMI (risk estimates are continuous changes in BMI, rather than RRs)<sup>5,6</sup> were included. The association of change in BMI with change in SSB consumption was assessed using multivariate linear regression accounting for within-person repeated measures, as described in earlier work;<sup>6,7</sup> separate linear relationships were estimated for BMI <25 and BMI  $\geq 25$  since the rate of increase in BMI due to SSB intake varies based on an individual's baseline BMI. Independently of this, additional direct relationships with type 2 diabetes (after adjustment for BMI) and CHD were included; total relationships with diabetes (direct plus mediated; after excluding BMI-mediated relationships with diabetes) were investigated in sensitivity analyses (see eFigure 18).<sup>10</sup>

<sup>f</sup> Estimated RRs are nearly identical for polyunsaturated fats (PUFA) replacing carbohydrates (Carbs) or saturated fats (SFA). For comparison, in sensitivity analyses we also evaluated the estimated mortality associated with excess SFA in place of PUFA. PUFA in place of carbs is the same as PUFA in place of carbs or SFA.

<sup>g</sup> Consistent with GBD and available evidence for harms of high BP on specific CVD outcomes the relationships of high intake of dietary sodium with CHD, ischemic stroke, hemorrhagic stroke, HHD, rheumatic heart disease (RHD), cardiomyopathy and myocarditis (CMM), atrial fibrillation and flutter (AF), aortic aneurysm (AA), peripheral vascular disease (PVD), endocarditis, and other cardiovascular and circulatory diseases were estimated through their measured effects on SBP (i.e., as mediated by SBP effects).<sup>5,8</sup> Direct effects on SBP are continuous changes in SBP, rather than RRs. For every year above or below age 50, there was 0.105 mm Hg (95%CI: 0.047, 0.164) larger or smaller BP reduction, respectively. No further interactions with SBP reduction were assumed below age 25 or above age 70, due to limited trial evidence outside this age range. Based on the evidence, we assumed a log-linear dose-response between SBP and CVD until a BP level of 115 mm Hg, below which we assumed no further contribution to risk.<sup>8</sup>

**eTable 6. Participant sociodemographics by combined 2-year NHANES Cycles, 1999-2002 and 2009-2012.**

|                          | 1999-2002 (n=8,104) <sup>a</sup> |                   | 2009-2012 (n=8,516) <sup>b</sup> |                   |
|--------------------------|----------------------------------|-------------------|----------------------------------|-------------------|
|                          | N                                | % (95% CI)        | N                                | % (95% CI)        |
| <b>Age group (years)</b> |                                  |                   |                                  |                   |
| 25-34                    | 1579                             | 22.2 (19.9, 24.6) | 1,522                            | 19.9 (18.1, 21.9) |
| 35-44                    | 1575                             | 24.7 (23.0, 26.6) | 1,596                            | 20.2 (18.3, 22.3) |
| 45-54                    | 1405                             | 21.3 (19.7, 23.0) | 1,656                            | 21.7 (19.9, 23.6) |
| 55-64                    | 1253                             | 13.7 (12.2, 15.4) | 1,579                            | 19.2 (17.9, 20.6) |
| 65-74                    | 1217                             | 10.7 (9.8, 11.6)  | 1,184                            | 11.2 (10.2, 12.2) |
| ≥75                      | 1075                             | 7.4 (6.5, 8.4)    | 979                              | 7.8 (7.0, 8.7)    |
| <b>Sex</b>               |                                  |                   |                                  |                   |
| Male                     | 3,870                            | 48.2 (46.8, 49.6) | 4,085                            | 47.7 (46.4, 48.9) |
| Female                   | 4,234                            | 51.8 (50.4, 53.2) | 4,431                            | 52.4 (51.1, 53.6) |
| <b>Race/ethnicity</b>    |                                  |                   |                                  |                   |
| Non-Hispanic White       | 4,045                            | 72.7 (69.1, 76.0) | 3,911                            | 69.1 (63.7, 73.9) |
| Non-Hispanic Black       | 1,527                            | 10.7 (8.6, 13.2)  | 1,802                            | 11.0 (8.9, 13.6)  |
| Hispanic                 | 2,280                            | 12.4 (9.1, 16.7)  | 2,017                            | 13.3 (10.0, 17.6) |
| Other/mixed race         | 252                              | 4.2 (3.1, 5.7)    | 786                              | 6.7 (5.4, 8.3)    |
| <b>Education</b>         |                                  |                   |                                  |                   |
| <High School             | 2,769                            | 21.6 (20.0, 23.3) | 2,172                            | 17.3 (15.1, 19.8) |
| High school              | 3,727                            | 52.2 (49.2, 55.0) | 4,216                            | 50.3 (47.6, 53.5) |
| College graduate         | 1,590                            | 26.3 (23.2, 29.7) | 2,115                            | 32.2 (28.7, 35.8) |

<sup>a</sup> Combines data from 1999-2000 (n=3,847) and 2001-2002 (n=4,257) National Health and Nutrition Examination Survey cycles (NHANES). All data are weighted to account for NHANES complex survey and sampling methods.

<sup>b</sup> Combines data from 2009-2010 (n=4,614) and 2011-2012 (n=3,902) NHANES. All data are weighted to account for NHANES complex survey and sampling methods.

**eTable 7. US consumption levels for key dietary factors in 2009-2012 by population subgroups.**

| Dietary Factor <sup>a</sup>   | Population Strata <sup>b</sup> | Age                |                      |                    |                      |                    |                      |                    |                      |                    |                      |                    |                      |                                      |  |
|-------------------------------|--------------------------------|--------------------|----------------------|--------------------|----------------------|--------------------|----------------------|--------------------|----------------------|--------------------|----------------------|--------------------|----------------------|--------------------------------------|--|
|                               |                                | 25-34 y            |                      | 35-44 y            |                      | 45-54 y            |                      | 55-64 y            |                      | 65-74 y            |                      | 75+ y              |                      | 25+ y                                |  |
|                               |                                | Males<br>mean ± SD | Females<br>mean ± SD | Both genders<br>mean ± SD            |  |
| <b>Fruits (g/d)</b>           | <b>Overall by age</b>          | 95.7 ± 96.3        |                      | 91.7 ± 95.9        |                      | 120.5 ± 123.3      |                      | 130.6 ± 110.7      |                      | 138.8 ± 104.5      |                      | 136.8 ± 90         |                      | F: 121.8 ± 106.2<br>M: 107.5 ± 108.3 |  |
|                               | <b>Education</b>               |                    |                      |                    |                      |                    |                      |                    |                      |                    |                      |                    |                      |                                      |  |
|                               | <High-school                   | 100.7 ± 126.3      | 76.3 ± 125           | 65 ± 79.4          | 92.2 ± 90.9          | 80.6 ± 105.9       | 85.6 ± 68.4          | 98.9 ± 50.1        | 109.5 ± 71.3         | 88.1 ± 90.2        | 114 ± 96.4           | 86.3 ± 74          | 106.4 ± 68.7         | 90.9 ± 88.3                          |  |
|                               | High-school                    | 81.5 ± 57.8        | 88.3 ± 83.8          | 61.7 ± 54.9        | 81.2 ± 93.2          | 108.1 ± 72.5       | 115 ± 101            | 99.4 ± 84.4        | 120.4 ± 101.3        | 104.2 ± 96.7       | 150.1 ± 99.7         | 133.7 ± 74.8       | 151.3 ± 56.6         | 103.5 ± 105.9                        |  |
|                               | College                        | 92.7 ± 80.1        | 132.9 ± 81.9         | 114.7 ± 66.8       | 133 ± 69.9           | 172 ± 150.9        | 140.4 ± 112.4        | 169.8 ± 130.4      | 180.2 ± 130.9        | 166.5 ± 90.7       | 200.4 ± 132.5        | 174.6 ± 133.1      | 160.9 ± 139.5        | 146 ± 112.4                          |  |
|                               | <b>Race</b>                    |                    |                      |                    |                      |                    |                      |                    |                      |                    |                      |                    |                      |                                      |  |
|                               | White                          | 88 ± 90.4          | 103.3 ± 90.2         | 77.8 ± 72.7        | 100.9 ± 53.8         | 126.9 ± 112.8      | 117.7 ± 107.5        | 123.3 ± 108.9      | 140.1 ± 115.7        | 127.1 ± 91.4       | 159.5 ± 112.1        | 141.7 ± 101.4      | 138.4 ± 77.1         | 118.1 ± 109.9                        |  |
|                               | Black                          | 63.4 ± 115.4       | 79.9 ± 80.2          | 58.1 ± 78.1        | 71.6 ± 88.8          | 95.6 ± 112.5       | 112.3 ± 78.9         | 110.2 ± 110.4      | 120.4 ± 99.6         | 103.2 ± 122.6      | 100.6 ± 65.7         | 74.3 ± 74.4        | 125.2 ± 13.9         | 91.3 ± 99.1                          |  |
|                               | Hispanic                       | 107.4 ± 22.6       | 106 ± 141.9          | 84.4 ± 74.5        | 112.2 ± 82.8         | 123.6 ± 120.3      | 106.5 ± 81.4         | 109.4 ± 79         | 127 ± 77.1           | 97.5 ± 84.2        | 154.7 ± 104.4        | 112.4 ± 79.5       | 111.2 ± 76.2         | 109 ± 95.6                           |  |
|                               | Other                          | 73.8 ± 71.1        | 126.7 ± 72.2         | 113.5 ± 118.6      | 152.3 ± 169.8        | 128.6 ± 134.8      | 153.5 ± 110.9        | 137.2 ± 117.1      | 185.8 ± 136.9        | 140.3 ± 113.3      | 137 ± 130.4          | 116.1 ± 164.8      | 237.1 ± 131.9        | 133.8 ± 110.7                        |  |
|                               | <b>Total</b>                   | 88 ± 48.6          | 103.2 ± 100.6        | 80.3 ± 78          | 102.6 ± 109.3        | 123.2 ± 30.3       | 118.2 ± 101.9        | 121.7 ± 107.6      | 139 ± 112.9          | 123.4 ± 95.6       | 152.4 ± 110          | 134 ± 101.4        | 138.8 ± 81.1         | 115 ± 107.5                          |  |
| <b>Vegetables (g/d)</b>       | <b>Overall by age</b>          | 166.1 ± 85.6       |                      | 174.8 ± 85.4       |                      | 195.9 ± 45.5       |                      | 190.1 ± 105        |                      | 197 ± 102.5        |                      | 168.5 ± 80.4       |                      | F: 191.2 ± 106.6<br>M: 173 ± 104.9   |  |
|                               | <b>Education</b>               |                    |                      |                    |                      |                    |                      |                    |                      |                    |                      |                    |                      |                                      |  |
|                               | <High-school                   | 135.9 ± 60.9       | 164.1 ± 101.4        | 176.9 ± 70.5       | 151.7 ± 59.5         | 152.1 ± 19.3       | 172.7 ± 92.4         | 142.9 ± 76.6       | 188.6 ± 117.9        | 144.9 ± 74.3       | 182.9 ± 56.7         | 178.9 ± 104        | 153.3 ± 66.3         | 162 ± 79.6                           |  |
|                               | High-school                    | 147.9 ± 69.4       | 158.3 ± 96.9         | 141.9 ± 58.5       | 166 ± 80.2           | 155.6 ± 90.4       | 185 ± 50.3           | 160.3 ± 93.3       | 191.9 ± 94           | 182.9 ± 54.8       | 202.5 ± 112.6        | 157.3 ± 58.7       | 175 ± 91.8           | 167.9 ± 92.1                         |  |
|                               | College                        | 190.7 ± 63.2       | 190.6 ± 95.6         | 223.1 ± 110.9      | 194.2 ± 85.5         | 233.4 ± 45.3       | 273 ± 64.6           | 202.2 ± 95.3       | 241.7 ± 125.5        | 217.2 ± 52.6       | 236.5 ± 91.4         | 171.5 ± 70         | 181.4 ± 83.4         | 216.9 ± 129                          |  |
|                               | <b>Race</b>                    |                    |                      |                    |                      |                    |                      |                    |                      |                    |                      |                    |                      |                                      |  |
|                               | White                          | 161.3 ± 69.5       | 165.3 ± 85.9         | 162.9 ± 80.1       | 174.1 ± 72.7         | 177.8 ± 172        | 223.8 ± 151.1        | 170 ± 89.7         | 210.2 ± 118.8        | 190.8 ± 106.3      | 203.9 ± 102.4        | 163.3 ± 66.7       | 164.6 ± 76.4         | 182.6 ± 111.3                        |  |
|                               | Black                          | 102.5 ± 26.3       | 131.5 ± 72.9         | 141.4 ± 96.2       | 123.6 ± 64.9         | 143.6 ± 79.2       | 153.5 ± 124          | 137.3 ± 92.1       | 173.1 ± 74.1         | 141.9 ± 81.4       | 196 ± 70.2           | 159 ± 70.3         | 149 ± 67.7           | 142.3 ± 73.4                         |  |
|                               | Hispanic                       | 184 ± 62.4         | 183.9 ± 96.7         | 196.2 ± 30.1       | 191.1 ± 81.7         | 183 ± 69           | 190.9 ± 59.3         | 202.5 ± 85.1       | 202.5 ± 42.5         | 194.1 ± 89.1       | 220.5 ± 110.1        | 196.7 ± 78.7       | 218 ± 112.9          | 192 ± 80.1                           |  |
|                               | Other                          | 181.3 ± 82.6       | 230.3 ± 79.8         | 260 ± 154.4        | 228 ± 110.7          | 241.7 ± 102.1      | 235.4 ± 96           | 196.2 ± 143.8      | 265.9 ± 79.4         | 204.9 ± 117.6      | 220 ± 100.6          | 214.2 ± 92.9       | 269.9 ± 121.1        | 229.2 ± 118.6                        |  |
|                               | <b>Total</b>                   | 160.7 ± 69.7       | 171.2 ± 98.3         | 175.5 ± 89.9       | 174 ± 80.7           | 178.6 ± 49.3       | 211.2 ± 48.4         | 170.9 ± 94.2       | 208.2 ± 111.2        | 187.9 ± 104        | 205.1 ± 100.4        | 167.2 ± 76.9       | 169.4 ± 82.8         | 182.5 ± 106.2                        |  |
| <b>Nuts &amp; seeds (g/d)</b> | <b>Overall by age</b>          | 9.7 ± 23.8         |                      | 10.4 ± 21.8        |                      | 11.9 ± 19.1        |                      | 14 ± 15.4          |                      | 14.2 ± 34.7        |                      | 10.1 ± 21.9        |                      | F: 11.9 ± 20.7<br>M: 11.5 ± 21.6     |  |
|                               | <b>Education</b>               |                    |                      |                    |                      |                    |                      |                    |                      |                    |                      |                    |                      |                                      |  |
|                               | <High-school                   | 2.9 ± 6.2          | 1.8 ± 2.9            | 4.1 ± 4.9          | 5.4 ± 5.6            | 3.9 ± 10.4         | 6.8 ± 13.9           | 10.4 ± 22.9        | 8.7 ± 14.9           | 5 ± 14.7           | 7.7 ± 17.9           | 5.2 ± 6.3          | 8.1 ± 43.1           | 5.8 ± 14.2                           |  |
|                               | High-school                    | 6.7 ± 9.6          | 6 ± 11.7             | 8.5 ± 9.1          | 9.4 ± 31.4           | 10.1 ± 17.6        | 11.9 ± 7.8           | 10.7 ± 12.7        | 13.2 ± 13            | 9.4 ± 13.5         | 13.3 ± 9.5           | 9.2 ± 8.2          | 9.4 ± 11.4           | 9.9 ± 13.1                           |  |
|                               | College                        | 22.6 ± 17.5        | 12.8 ± 18.2          | 14.6 ± 20.7        | 15.4 ± 17.5          | 14 ± 23.1          | 19.4 ± 23.7          | 21.2 ± 25.5        | 17.2 ± 15.2          | 22.5 ± 26.7        | 27.9 ± 57.1          | 15.3 ± 21.1        | 17.3 ± 16.8          | 17.7 ± 30.9                          |  |
|                               | <b>Race</b>                    |                    |                      |                    |                      |                    |                      |                    |                      |                    |                      |                    |                      |                                      |  |
|                               | White                          | 14.2 ± 13.8        | 9.4 ± 12.7           | 11.6 ± 15.4        | 12.4 ± 22.5          | 11.4 ± 15.1        | 15.1 ± 16.1          | 15.5 ± 17.5        | 15 ± 14.1            | 14 ± 21.3          | 15.3 ± 40.7          | 10.6 ± 13.9        | 10 ± 12.2            | 13.1 ± 10.8                          |  |
|                               | Black                          | 4.7 ± 8.4          | 5.4 ± 10.7           | 4.2 ± 6.5          | 9.9 ± 14.5           | 7.4 ± 12.3         | 9.5 ± 13.3           | 11.4 ± 11.7        | 12.4 ± 21.3          | 9.6 ± 35.2         | 10.9 ± 50.8          | 8.8 ± 14.5         | 17.3 ± 33.7          | 8.7 ± 22.6                           |  |
|                               | Hispanic                       | 9.3 ± 31.6         | 4.8 ± 4.8            | 5.9 ± 4            | 7 ± 18.3             | 4.5 ± 8.8          | 8.4 ± 34.8           | 6.1 ± 11.3         | 9 ± 34.2             | 7.7 ± 26.9         | 6.3 ± 18.4           | 2.3 ± 4.4          | 4.5 ± 7.5            | 6.7 ± 17.4                           |  |
|                               | Other                          | 7.3 ± 13.7         | 8.7 ± 16.6           | 10.4 ± 12          | 10.1 ± 28            | 14.7 ± 77.7        | 13.8 ± 19.2          | 8 ± 6.7            | 10.1 ± 20.9          | 16.4 ± 43.1        | 35.9 ± 99.5          | 10.5 ± 5.2         | 5 ± 8.3              | 11.4 ± 32.4                          |  |
|                               | <b>Total</b>                   | 11.6 ± 6.2         | 7.9 ± 13.9           | 9.7 ± 14.3         | 11 ± 25              | 10.3 ± 18.9        | 13.4 ± 20.5          | 14 ± 4.9           | 13.9 ± 14.3          | 13.3 ± 19.6        | 15 ± 43.9            | 10 ± 13.8          | 10.2 ± 26.1          | 11.7 ± 21.1                          |  |
| <b>Whole grains (g/d)</b>     | <b>Overall by age</b>          | 18.7 ± 17.1        |                      | 19.8 ± 19          |                      | 19.4 ± 16.8        |                      | 23.1 ± 19.3        |                      | 23.7 ± 19.7        |                      | 27.7 ± 20.5        |                      | F: 21.2 ± 16.3<br>M: 21.2 ± 20.9     |  |
|                               | <b>Education</b>               |                    |                      |                    |                      |                    |                      |                    |                      |                    |                      |                    |                      |                                      |  |

eTable 7. US consumption levels for key dietary factors in 2009-2012 by population subgroups (continued)

| Dietary Factor <sup>a</sup>         | Population Strata <sup>b</sup> | Age                |                      |                    |                      |                    |                      |                    |                      |                    |                      |                    |                      |                                  |
|-------------------------------------|--------------------------------|--------------------|----------------------|--------------------|----------------------|--------------------|----------------------|--------------------|----------------------|--------------------|----------------------|--------------------|----------------------|----------------------------------|
|                                     |                                | 25-34 y            |                      | 35-44 y            |                      | 45-54 y            |                      | 55-64 y            |                      | 65-74 y            |                      | 75+ y              |                      | 25+ y                            |
|                                     |                                | Males<br>mean ± SD | Females<br>mean ± SD | Both genders<br>mean ± SD        |
|                                     | <High-school                   | 13.3 ± 21.8        | 13.5 ± 8.4           | 8.7 ± 13.6         | 13.5 ± 14.1          | 13.8 ± 15.8        | 13.9 ± 10.7          | 10.7 ± 11.2        | 22.4 ± 17.4          | 13.9 ± 12.6        | 20.1 ± 17.5          | 21.4 ± 22.8        | 27.1 ± 21.8          | 15.5 ± 16.1                      |
|                                     | High-school                    | 16.1 ± 19.9        | 14.7 ± 11.6          | 15.8 ± 13.9        | 17.8 ± 11.5          | 18.6 ± 16.2        | 15.9 ± 9.6           | 24.6 ± 25.4        | 21.6 ± 18.1          | 26.7 ± 23.6        | 23.8 ± 20.5          | 30 ± 20.4          | 28.1 ± 17.7          | 19.7 ± 17.9                      |
|                                     | College                        | 24.3 ± 19.6        | 26.7 ± 14.7          | 28.2 ± 31.2        | 27.7 ± 16            | 29 ± 24.1          | 23.6 ± 18            | 27.6 ± 12.5        | 24.7 ± 16.7          | 25.8 ± 16.1        | 26.4 ± 6.7           | 25.8 ± 20.4        | 34.6 ± 22.5          | 26.5 ± 19.7                      |
|                                     | <b>Race</b>                    |                    |                      |                    |                      |                    |                      |                    |                      |                    |                      |                    |                      |                                  |
|                                     | White                          | 20 ± 15.9          | 21.9 ± 5.5           | 20.5 ± 19          | 22.3 ± 14            | 21.1 ± 17          | 18.6 ± 13.2          | 24.1 ± 21.9        | 22.9 ± 18.1          | 25.1 ± 20          | 24.8 ± 20.2          | 27.8 ± 21          | 28.9 ± 19.5          | 22.5 ± 17.7                      |
|                                     | Black                          | 17.1 ± 16.8        | 16.1 ± 16.6          | 14.1 ± 26.6        | 13.9 ± 13.8          | 22.2 ± 21.9        | 16.5 ± 15.6          | 17.2 ± 14.5        | 18.2 ± 16            | 18.8 ± 19.6        | 17.4 ± 26.4          | 19.7 ± 22.2        | 26.7 ± 17.8          | 17.3 ± 19.9                      |
|                                     | Hispanic                       | 14.3 ± 17.8        | 10.6 ± 10.6          | 10.8 ± 2.8         | 16.3 ± 21.2          | 17.1 ± 9.4         | 13.2 ± 12.4          | 20.7 ± 17.7        | 20.1 ± 4.3           | 20.7 ± 34          | 18.4 ± 10.9          | 17.2 ± 17.3        | 23.6 ± 16.7          | 15 ± 14.9                        |
|                                     | Other                          | 19.8 ± 13          | 22.6 ± 20.3          | 28.1 ± 45          | 30.1 ± 22.2          | 26.2 ± 38.5        | 24 ± 13              | 27 ± 29.6          | 35.6 ± 5.7           | 19.3 ± 24.9        | 25.1 ± 17.1          | 23.1 ± 12.8        | 36.1 ± 32.5          | 25.9 ± 27.1                      |
|                                     | <b>Total</b>                   | 18.5 ± 20          | 19 ± 13.8            | 18.7 ± 22.5        | 20.8 ± 14.9          | 21 ± 19.7          | 18 ± 13.6            | 23.4 ± 21          | 22.8 ± 17.7          | 23.9 ± 19.9        | 23.5 ± 19.5          | 26.4 ± 21.4        | 28.7 ± 19.8          | 21.2 ± 18.7                      |
| <b>Red meats, unprocessed (g/d)</b> | <b>Overall by age</b>          | 47.4 ± 31.6        |                      | 49.6 ± 18.3        |                      | 50.5 ± 22.6        |                      | 43.9 ± 16.2        |                      | 46.3 ± 26.9        |                      | 42.9 ± 23.2        |                      | F: 39.4 ± 17.9<br>M: 56.1 ± 25.9 |
|                                     | <b>Education</b>               |                    |                      |                    |                      |                    |                      |                    |                      |                    |                      |                    |                      |                                  |
|                                     | <High-school                   | 50.2 ± 24.8        | 39 ± 21.3            | 80.1 ± 19.3        | 52.3 ± 26.6          | 72 ± 23.6          | 45.9 ± 18.1          | 58.4 ± 28.3        | 43.6 ± 16.9          | 55.1 ± 46          | 36.2 ± 33.7          | 46.5 ± 17.7        | 37.2 ± 26.3          | 52.3 ± 28.6                      |
|                                     | High-school                    | 59.7 ± 35          | 44.2 ± 11.5          | 59.9 ± 24.8        | 41.9 ± 17.3          | 62 ± 24.6          | 46.9 ± 19.5          | 58.8 ± 25.6        | 37.8 ± 7.1           | 53.7 ± 33          | 39.2 ± 29.1          | 55.5 ± 32.4        | 40.9 ± 20.4          | 50.3 ± 19.7                      |
|                                     | College                        | 51.6 ± 44          | 33.9 ± 5.1           | 49.8 ± 17.1        | 30 ± 14.7            | 46.7 ± 26.7        | 35 ± 28.7            | 39.5 ± 27          | 29.2 ± 15.3          | 55.2 ± 6           | 41.5 ± 25.6          | 40.2 ± 33.5        | 32.3 ± 22.4          | 40 ± 24.7                        |
|                                     | <b>Race</b>                    |                    |                      |                    |                      |                    |                      |                    |                      |                    |                      |                    |                      |                                  |
|                                     | White                          | 54.9 ± 36.1        | 41.4 ± 16.5          | 58.3 ± 20          | 37.7 ± 16.2          | 60.4 ± 20.4        | 43.8 ± 11.8          | 51 ± 19            | 34.1 ± 13.4          | 56.8 ± 16          | 39.6 ± 30.8          | 48.6 ± 27.6        | 38.8 ± 19.3          | 47.1 ± 20.7                      |
|                                     | Black                          | 52.4 ± 21.6        | 44.7 ± 24.5          | 62.3 ± 17.9        | 42.9 ± 35.4          | 38 ± 23.6          | 39.8 ± 17.9          | 47.2 ± 38.9        | 39.6 ± 32.9          | 44.2 ± 7.3         | 37.8 ± 18.4          | 41.2 ± 34.1        | 42.1 ± 37            | 44.5 ± 26.1                      |
|                                     | Hispanic                       | 59.1 ± 21.8        | 37.8 ± 14.4          | 67.9 ± 33.2        | 45.5 ± 3.6           | 64 ± 30.5          | 44.2 ± 22.7          | 70.2 ± 30.3        | 43.7 ± 30.3          | 48 ± 30.3          | 40.1 ± 5.2           | 46.4 ± 39.6        | 37 ± 36.9            | 52.2 ± 29.1                      |
|                                     | Other                          | 57.3 ± 53          | 25.9 ± 30.2          | 55.5 ± 31.1        | 32.7 ± 20.9          | 68.8 ± 53.9        | 38.4 ± 11.9          | 59.1 ± 31.7        | 35.5 ± 28.8          | 46.9 ± 48.7        | 29.7 ± 23.5          | 57.7 ± 37.5        | 39.8 ± 21.7          | 44.6 ± 32.5                      |
|                                     | <b>Total</b>                   | 55.6 ± 37.4        | 39.6 ± 12.4          | 60.3 ± 18.7        | 39.3 ± 10.3          | 58.9 ± 26.6        | 42.9 ± 14.6          | 52.6 ± 17.6        | 35.7 ± 8.7           | 54.5 ± 20.7        | 39 ± 29.6            | 48.4 ± 24.6        | 39 ± 21.3            | 47.4 ± 23.6                      |
| <b>Processed meats (g/d)</b>        | <b>Overall by age</b>          | 31 ± 18            |                      | 32 ± 17.1          |                      | 32 ± 20.5          |                      | 29.1 ± 17.8        |                      | 32.3 ± 22          |                      | 25.8 ± 18.8        |                      | F: 24.9 ± 17.1<br>M: 37.3 ± 18.9 |
|                                     | <b>Education</b>               |                    |                      |                    |                      |                    |                      |                    |                      |                    |                      |                    |                      |                                  |
|                                     | <High-school                   | 35.7 ± 26.9        | 25.2 ± 16.4          | 29.4 ± 6           | 25.1 ± 16.1          | 36.9 ± 28.9        | 18.6 ± 16.1          | 36.3 ± 18          | 27.2 ± 21.4          | 42.3 ± 16.1        | 23.7 ± 20.8          | 39.4 ± 32.1        | 24.7 ± 15.4          | 29.4 ± 14.1                      |
|                                     | High-school                    | 39.8 ± 21.9        | 27.5 ± 12.3          | 43.4 ± 24.5        | 29.6 ± 19.3          | 42.7 ± 17.4        | 29.7 ± 28.2          | 39.7 ± 13.9        | 24.4 ± 16.6          | 42.2 ± 33          | 28.6 ± 15.6          | 27.4 ± 17.5        | 21.8 ± 19.8          | 33.7 ± 21.3                      |
|                                     | College                        | 30.6 ± 24.9        | 25 ± 0.7             | 38.9 ± 18.2        | 20 ± 15.4            | 34.1 ± 16          | 22.9 ± 15.8          | 29.7 ± 17.7        | 18.1 ± 10.3          | 32.1 ± 7.4         | 24.6 ± 19.1          | 30.7 ± 22.7        | 15.4 ± 18.9          | 27.2 ± 16.5                      |
|                                     | <b>Race</b>                    |                    |                      |                    |                      |                    |                      |                    |                      |                    |                      |                    |                      |                                  |
|                                     | White                          | 37 ± 25.7          | 27.8 ± 12.2          | 43.2 ± 16.6        | 26.1 ± 13.9          | 41.9 ± 12.2        | 27.2 ± 24.4          | 37.2 ± 14.1        | 23.7 ± 16.8          | 38.7 ± 28.9        | 27.9 ± 15.2          | 32.6 ± 18.8        | 21.6 ± 17.9          | 32.3 ± 19.8                      |
|                                     | Black                          | 36.5 ± 28.7        | 29.9 ± 22.4          | 36.3 ± 24.4        | 30.1 ± 21.7          | 44.2 ± 22          | 27.7 ± 9.2           | 40 ± 31.5          | 29.1 ± 13.6          | 46.4 ± 52.2        | 29.8 ± 10.4          | 31.4 ± 13.4        | 31.9 ± 25.6          | 33.7 ± 17.6                      |
|                                     | Hispanic                       | 34.4 ± 20.2        | 19.8 ± 16.5          | 30.6 ± 22.6        | 20.6 ± 18.4          | 28.8 ± 29          | 22.6 ± 6.5           | 28.3 ± 9.7         | 13.1 ± 14.5          | 32 ± 26.7          | 14 ± 4.3             | 26.9 ± 23.4        | 12.6 ± 15.6          | 25 ± 16.4                        |
|                                     | Other                          | 32.5 ± 24.4        | 25.2 ± 19.1          | 30.5 ± 22.2        | 18.6 ± 17.7          | 19.9 ± 22.8        | 12.6 ± 14.6          | 22.6 ± 5           | 11.9 ± 7.5           | 36.1 ± 30.5        | 22.9 ± 18.5          | 20.7 ± 27          | 10.7 ± 18.3          | 22.7 ± 10.9                      |
|                                     | <b>Total</b>                   | 36.1 ± 21.6        | 26.2 ± 11.8          | 39.1 ± 16.2        | 25.2 ± 15.1          | 39.2 ± 15.4        | 25.7 ± 22.3          | 36 ± 16.5          | 22.7 ± 16.5          | 38.6 ± 26.4        | 26.7 ± 18.2          | 31.6 ± 8.8         | 21.7 ± 18.6          | 30.8 ± 19                        |
| <b>SSB (servings (8 oz)/d)</b>      | <b>Overall by age</b>          | 1.66 ± 1.69        |                      | 1.48 ± 1.67        |                      | 1.12 ± 1.29        |                      | 0.85 ± 1.18        |                      | 0.6 ± 0.93         |                      | 0.53 ± 0.81        |                      | F: 1 ± 1.41<br>M: 1.3 ± 1.45     |
|                                     | <b>Education</b>               |                    |                      |                    |                      |                    |                      |                    |                      |                    |                      |                    |                      |                                  |
|                                     | <High-school                   | 2.22 ± 1.52        | 1.98 ± 1.63          | 2.24 ± 1.81        | 1.96 ± 2.16          | 1.67 ± 1.15        | 1.55 ± 1.62          | 1.26 ± 1.42        | 0.81 ± 0.97          | 0.83 ± 0.83        | 0.98 ± 0.68          | 0.76 ± 0.92        | 0.59 ± 0.87          | 1.49 ± 1.56                      |
|                                     | High-school                    | 2.44 ± 1.94        | 1.74 ± 1.81          | 1.87 ± 1.74        | 1.6 ± 1.89           | 1.29 ± 1.29        | 1.16 ± 1.32          | 1.02 ± 1           | 0.91 ± 1.4           | 0.68 ± 0.97        | 0.57 ± 0.85          | 0.56 ± 0.81        | 0.51 ± 0.85          | 1.31 ± 1.56                      |
|                                     | College                        | 1.1 ± 1            | 0.67 ± 0.91          | 0.94 ± 1.17        | 0.74 ± 0.98          | 0.9 ± 1.37         | 0.51 ± 0.62          | 0.81 ± 0.22        | 0.35 ± 0.74          | 0.38 ± 0.42        | 0.26 ± 0.54          | 0.4 ± 0.75         | 0.28 ± 0.5           | 0.69 ± 0.99                      |
|                                     | <b>Race</b>                    |                    |                      |                    |                      |                    |                      |                    |                      |                    |                      |                    |                      |                                  |

eTable 7. US consumption levels for key dietary factors in 2009-2012 by population subgroups (continued)

| Dietary Factor <sup>a</sup>    | Population Strata <sup>b</sup> | Age                |                      |                    |                      |                    |                      |                    |                      |                    |                      |                    |                      |                                |
|--------------------------------|--------------------------------|--------------------|----------------------|--------------------|----------------------|--------------------|----------------------|--------------------|----------------------|--------------------|----------------------|--------------------|----------------------|--------------------------------|
|                                |                                | 25-34 y            |                      | 35-44 y            |                      | 45-54 y            |                      | 55-64 y            |                      | 65-74 y            |                      | 75+ y              |                      | 25+ y                          |
|                                |                                | Males<br>mean ± SD | Females<br>mean ± SD | Both genders<br>mean ± SD      |
|                                | White                          | 2.06 ± 2.05        | 1.32 ± 1.77          | 1.59 ± 1.31        | 1.35 ± 1.47          | 1.2 ± 1.4          | 0.95 ± 0.99          | 0.92 ± 0.9         | 0.64 ± 1.24          | 0.53 ± 0.76        | 0.53 ± 1.01          | 0.55 ± 0.82        | 0.42 ± 0.79          | 1.06 ± 1.54                    |
|                                | Black                          | 1.93 ± 1.13        | 1.84 ± 1.37          | 2.04 ± 1.34        | 1.81 ± 1.28          | 1.43 ± 1.05        | 1.55 ± 1.35          | 1.26 ± 0.94        | 1.28 ± 0.92          | 1.04 ± 0.92        | 1.05 ± 0.92          | 0.95 ± 0.33        | 1.33 ± 1.02          | 1.57 ± 1.21                    |
|                                | Hispanic                       | 1.93 ± 0.92        | 1.5 ± 1.3            | 1.68 ± 1.19        | 1.19 ± 1.01          | 1.42 ± 1.17        | 1.06 ± 0.74          | 1.12 ± 0.72        | 0.78 ± 1.13          | 0.84 ± 0.41        | 0.51 ± 1.4           | 0.52 ± 0.6         | 0.45 ± 0.2           | 1.33 ± 1.12                    |
|                                | Other                          | 1.25 ± 1.15        | 0.88 ± 1.15          | 1.33 ± 1.13        | 0.7 ± 0.62           | 0.75 ± 0.44        | 0.58 ± 0.5           | 1.39 ± 0.75        | 0.32 ± 0.2           | 0.55 ± 0.61        | 0.93 ± 0.25          | 0.39 ± 0.91        | 0.36 ± 0.72          | 0.87 ± 1.03                    |
|                                | <b>Total</b>                   | <b>1.95 ± 1.73</b> | <b>1.38 ± 1.6</b>    | <b>1.62 ± 1.59</b> | <b>1.34 ± 1.74</b>   | <b>1.23 ± 1.32</b> | <b>1.02 ± 1.26</b>   | <b>0.99 ± 1.15</b> | <b>0.71 ± 1.19</b>   | <b>0.6 ± 0.8</b>   | <b>0.6 ± 1.03</b>    | <b>0.57 ± 0.79</b> | <b>0.5 ± 0.82</b>    | <b>1.14 ± 1.44</b>             |
| <b>Polysaturated fats (%E)</b> | <b>Overall by age</b>          | 7.3 ± 1.5          |                      | 7.7 ± 1.3          |                      | 7.8 ± 1.7          |                      | 7.9 ± 1.5          |                      | 7.8 ± 1.6          |                      | 7.9 ± 1.7          |                      | F: 7.9 ± 1.5<br>M: 7.5 ± 1.5   |
|                                | <b>Education</b>               |                    |                      |                    |                      |                    |                      |                    |                      |                    |                      |                    |                      |                                |
|                                | <High-school                   | 6.5 ± 1.6          | 6.7 ± 1.6            | 7.1 ± 1.8          | 7.1 ± 0.5            | 7.8 ± 2.1          | 7.5 ± 1.5            | 7.6 ± 2            | 7.7 ± 1.3            | 7.6 ± 2            | 7.4 ± 1.6            | 7.7 ± 1.6          | 7.9 ± 1.4            | 7.4 ± 1.6                      |
|                                | High-school                    | 7.1 ± 1.1          | 7.4 ± 1.6            | 7.5 ± 1.4          | 8 ± 1.9              | 7.5 ± 1.9          | 8.2 ± 0.9            | 7.6 ± 1.7          | 8.3 ± 1.4            | 7.4 ± 1.5          | 8 ± 1.6              | 7.4 ± 1.5          | 8.1 ± 1.9            | 7.7 ± 1.7                      |
|                                | College                        | 7.7 ± 1.6          | 7.5 ± 1.2            | 7.8 ± 1.1          | 8 ± 1.6              | 7.8 ± 0.9          | 7.9 ± 1.4            | 7.8 ± 1.1          | 8.2 ± 1.4            | 8.1 ± 1.5          | 7.9 ± 1.4            | 7.8 ± 1.6          | 8.3 ± 1.8            | 7.9 ± 1.2                      |
|                                | <b>Race</b>                    |                    |                      |                    |                      |                    |                      |                    |                      |                    |                      |                    |                      |                                |
|                                | White                          | 7.4 ± 1.5          | 7.1 ± 1.7            | 7.6 ± 1.2          | 8 ± 1                | 7.7 ± 1.8          | 8 ± 1.8              | 7.8 ± 1.5          | 8.2 ± 1.3            | 7.8 ± 1.6          | 7.9 ± 1.6            | 7.7 ± 1.6          | 8.2 ± 1.8            | 7.8 ± 1.6                      |
|                                | Black                          | 7.3 ± 0.3          | 8 ± 1.9              | 7.8 ± 1.1          | 8.1 ± 1.8            | 8.1 ± 1.5          | 8.3 ± 1.4            | 8 ± 1.6            | 8.6 ± 1.9            | 7.7 ± 1.7          | 8.4 ± 1.3            | 7.6 ± 1.3          | 7.5 ± 1.5            | 8 ± 1.5                        |
|                                | Hispanic                       | 7 ± 1.4            | 7.2 ± 1.3            | 7.3 ± 0.6          | 7.6 ± 1.9            | 7.1 ± 0.9          | 7.2 ± 1.5            | 7.2 ± 1.9          | 7.2 ± 1.7            | 7 ± 1.7            | 7.1 ± 0.4            | 6.6 ± 1.5          | 7 ± 1.4              | 7.2 ± 1.6                      |
|                                | Other                          | 7 ± 1.3            | 8 ± 1.4              | 7.6 ± 0.4          | 7.3 ± 1.9            | 7.3 ± 1.5          | 8.5 ± 1.9            | 6.6 ± 1.6          | 8.7 ± 2.5            | 6.7 ± 1.5          | 6.2 ± 1.7            | 7.6 ± 1.8          | 7.1 ± 0.5            | 7.6 ± 1                        |
|                                | <b>Total</b>                   | <b>7.3 ± 1.4</b>   | <b>7.3 ± 1.5</b>     | <b>7.5 ± 1.2</b>   | <b>7.9 ± 1.4</b>     | <b>7.7 ± 1.7</b>   | <b>8 ± 1.6</b>       | <b>7.7 ± 1.6</b>   | <b>8.2 ± 1.4</b>     | <b>7.6 ± 1.6</b>   | <b>7.8 ± 1.6</b>     | <b>7.6 ± 1.6</b>   | <b>8.1 ± 1.7</b>     | <b>47.4 ± 23.6</b>             |
| <b>Saturated fats (%E)</b>     | <b>Overall by age</b>          | 10.4 ± 1.9         |                      | 10.6 ± 2           |                      | 10.9 ± 1.9         |                      | 10.6 ± 2.3         |                      | 10.7 ± 2.1         |                      | 10.7 ± 2           |                      | F: 10.6 ± 1.9<br>M: 10.7 ± 2.1 |
|                                | <b>Education</b>               |                    |                      |                    |                      |                    |                      |                    |                      |                    |                      |                    |                      |                                |
|                                | <High-school                   | 9.6 ± 1.4          | 10.1 ± 2.2           | 9.7 ± 1.5          | 9.6 ± 1.1            | 11 ± 2.4           | 10.2 ± 2.2           | 10.5 ± 2.4         | 10.3 ± 2.8           | 11 ± 2.5           | 10.2 ± 2.5           | 10.6 ± 2.3         | 10.1 ± 2.5           | 10.2 ± 2                       |
|                                | High-school                    | 10.5 ± 1.8         | 10.7 ± 1.7           | 11 ± 1.8           | 10.4 ± 1.7           | 11.1 ± 2           | 11.2 ± 2.1           | 11.1 ± 2.4         | 10.5 ± 2.3           | 11 ± 1.9           | 10.8 ± 2.1           | 10.6 ± 2.1         | 10.9 ± 1.8           | 10.8 ± 2                       |
|                                | College                        | 10.2 ± 2.1         | 10.4 ± 1.9           | 11 ± 3.2           | 10.7 ± 1.7           | 10.8 ± 1.4         | 10.7 ± 1             | 10.5 ± 2.4         | 10.2 ± 1.5           | 10.2 ± 1.7         | 11.2 ± 1.9           | 11.2 ± 1.5         | 10.8 ± 1.8           | 10.6 ± 2                       |
|                                | <b>Race</b>                    |                    |                      |                    |                      |                    |                      |                    |                      |                    |                      |                    |                      |                                |
|                                | White                          | 10.7 ± 2           | 10.8 ± 1.6           | 11.2 ± 2.1         | 10.5 ± 1.7           | 11.5 ± 1.7         | 11.2 ± 1.8           | 11 ± 2.5           | 10.6 ± 2.2           | 10.9 ± 2.1         | 11 ± 2.3             | 11 ± 1.9           | 10.9 ± 1.9           | 11 ± 2                         |
|                                | Black                          | 10.1 ± 1.9         | 10.5 ± 1.8           | 9.9 ± 2            | 10.5 ± 1.7           | 10.4 ± 2.2         | 10.3 ± 1.6           | 10.5 ± 2.1         | 10.4 ± 1.9           | 10.1 ± 3.9         | 10.5 ± 3.4           | 10.9 ± 1           | 9.4 ± 2.3            | 10.3 ± 1.8                     |
|                                | Hispanic                       | 9.7 ± 1            | 10.3 ± 1             | 10.6 ± 0.8         | 10.1 ± 1.6           | 9.9 ± 0.6          | 10.3 ± 1.8           | 10.3 ± 1.9         | 9.6 ± 1.7            | 10.2 ± 1.2         | 9.6 ± 1.7            | 9.1 ± 1.7          | 9.8 ± 2.3            | 10.1 ± 1.9                     |
|                                | Other                          | 9 ± 2.2            | 9.4 ± 2              | 8.8 ± 1.8          | 10 ± 1.1             | 8.7 ± 1.8          | 10 ± 1.4             | 8.9 ± 1.6          | 8.7 ± 1.8            | 9.4 ± 2.5          | 8.5 ± 1.7            | 9.1 ± 2.4          | 8.6 ± 2.7            | 9.2 ± 1.9                      |
|                                | <b>Total</b>                   | <b>10.3 ± 1.9</b>  | <b>10.5 ± 1.8</b>    | <b>10.8 ± 2.4</b>  | <b>10.4 ± 1.7</b>    | <b>11 ± 1.9</b>    | <b>10.9 ± 1.8</b>    | <b>10.8 ± 2.4</b>  | <b>10.4 ± 2.2</b>    | <b>10.7 ± 2</b>    | <b>10.7 ± 2.2</b>    | <b>10.8 ± 2</b>    | <b>10.7 ± 2.1</b>    | <b>10.7 ± 2</b>                |
| <b>Carbohydrates (%E)</b>      | <b>Overall by age</b>          | 50.3 ± 6.7         |                      | 49.3 ± 7.4         |                      | 48.6 ± 7.1         |                      | 48.9 ± 7.3         |                      | 49 ± 7.2           |                      | 51 ± 6.1           |                      | F: 50.5 ± 6.7<br>M: 48.2 ± 7.3 |
|                                | <b>Education</b>               |                    |                      |                    |                      |                    |                      |                    |                      |                    |                      |                    |                      |                                |
|                                | <High-school                   | 52.5 ± 8.2         | 53.4 ± 4             | 49.7 ± 4.9         | 53.1 ± 6.3           | 48.4 ± 9.2         | 51.7 ± 4             | 48.2 ± 5.8         | 51.2 ± 7.5           | 47 ± 7.5           | 51.9 ± 8.1           | 50.2 ± 7.2         | 52.4 ± 6.1           | 50.9 ± 7.3                     |
|                                | High-school                    | 49.9 ± 6.3         | 51.7 ± 4.7           | 46.6 ± 7.9         | 50.4 ± 6.2           | 47.4 ± 6.6         | 49 ± 7.1             | 47.6 ± 7.8         | 49.9 ± 6.2           | 47.7 ± 6.3         | 50 ± 6.6             | 50.8 ± 6.2         | 51.8 ± 4.9           | 49.2 ± 6.8                     |
|                                | College                        | 46.5 ± 6.6         | 50.4 ± 6.1           | 47.5 ± 9           | 50.8 ± 6.4           | 48.2 ± 6.2         | 48.7 ± 8.2           | 48.6 ± 8.4         | 48.7 ± 7.1           | 47.5 ± 6.9         | 50 ± 8.4             | 49.3 ± 6.5         | 48.8 ± 6.3           | 48.7 ± 7.4                     |
|                                | <b>Race</b>                    |                    |                      |                    |                      |                    |                      |                    |                      |                    |                      |                    |                      |                                |
|                                | White                          | 48.4 ± 7.8         | 51.2 ± 6.2           | 46.5 ± 7.8         | 50.7 ± 6.9           | 46.8 ± 7           | 48.7 ± 7.7           | 47.7 ± 7.9         | 48.9 ± 6.7           | 46.7 ± 6.6         | 49.7 ± 7.3           | 49.8 ± 6.3         | 51 ± 5.3             | 48.7 ± 7.3                     |
|                                | Black                          | 47.8 ± 5.1         | 50.7 ± 4.4           | 48.2 ± 7.5         | 50 ± 5.2             | 48 ± 7             | 50 ± 3.3             | 47.7 ± 6.3         | 50.1 ± 7.5           | 48.9 ± 3.6         | 50.3 ± 5.6           | 49.1 ± 7.5         | 54.8 ± 7             | 49.5 ± 6                       |
|                                | Hispanic                       | 51.1 ± 5.5         | 52.3 ± 6.5           | 48.2 ± 3.2         | 51.8 ± 5.1           | 51 ± 5.6           | 51.2 ± 7.7           | 49.1 ± 5.9         | 52.9 ± 5             | 50.4 ± 6.7         | 53 ± 6.7             | 54.4 ± 6.9         | 53.5 ± 5.7           | 51.1 ± 6.6                     |
|                                | Other                          | 51.2 ± 4.2         | 52.4 ± 7             | 53.1 ± 6.3         | 54 ± 4.8             | 51.8 ± 5.6         | 51 ± 4.4             | 52.6 ± 8.6         | 54.2 ± 4.8           | 52.8 ± 3.1         | 58.6 ± 7.3           | 53.8 ± 7.8         | 55 ± 3.8             | 52.8 ± 6.2                     |

eTable 7. US consumption levels for key dietary factors in 2009-2012 by population subgroups (continued)

| Dietary Factor <sup>a</sup>    | Population Strata <sup>b</sup> | Age                |                      |                    |                      |                    |                      |                    |                      |                    |                      |                    |                      |                                 |
|--------------------------------|--------------------------------|--------------------|----------------------|--------------------|----------------------|--------------------|----------------------|--------------------|----------------------|--------------------|----------------------|--------------------|----------------------|---------------------------------|
|                                |                                | 25-34 y            |                      | 35-44 y            |                      | 45-54 y            |                      | 55-64 y            |                      | 65-74 y            |                      | 75+ y              |                      | 25+ y                           |
|                                |                                | Males<br>mean ± SD | Females<br>mean ± SD | Both genders<br>mean ± SD       |
|                                | <b>Total</b>                   | 49.1 ± 7           | 51.5 ± 6.2           | 47.5 ± 8           | 51 ± 6.4             | 47.8 ± 7           | 49.3 ± 7.2           | 48 ± 7.8           | 49.7 ± 6.7           | 47.5 ± 6.8         | 50.4 ± 7.4           | 50.2 ± 6.6         | 51.5 ± 5.6           | 49.4 ± 7.1                      |
| <b>Seafood omega-3s (mg/d)</b> | <b>Overall by age</b>          | 97.6 ± 84.3        |                      | 96.8 ± 30.2        |                      | 97.3 ± 24.1        |                      | 98.9 ± 75          |                      | 118.5 ± 98.4       |                      | 99.5 ± 93.6        |                      | F: 95.6 ± 79.4<br>M: 105 ± 54.5 |
|                                | <b>Education</b>               |                    |                      |                    |                      |                    |                      |                    |                      |                    |                      |                    |                      |                                 |
|                                | <High-school                   | 103.6 ± 92.2       | 81.6 ± 69.3          | 133.6 ± 121.3      | 74.8 ± 34            | 108.5 ± 72.5       | 85.7 ± 47.2          | 99 ± 104.4         | 82.4 ± 80            | 128.7 ± 170.7      | 84 ± 53.2            | 132.6 ± 139.5      | 96.8 ± 204.1         | 99.2 ± 82.6                     |
|                                | High-school                    | 96.6 ± 75.5        | 72.6 ± 46.5          | 99.1 ± 56.5        | 97.2 ± 68.8          | 83.1 ± 58.4        | 84.6 ± 21.6          | 100.1 ± 67.7       | 90.3 ± 60.5          | 116.1 ± 51.8       | 115.4 ± 71.8         | 75.4 ± 35.3        | 68.9 ± 66.7          | 91.6 ± 61.1                     |
|                                | College                        | 118.2 ± 57.1       | 117.4 ± 98.3         | 91.8 ± 31.6        | 90.6 ± 71.7          | 115.8 ± 64.5       | 124.5 ± 46.9         | 111.3 ± 8          | 106 ± 55.9           | 145.5 ± 149.1      | 117.6 ± 96.4         | 114.5 ± 94.2       | 200.1 ± 115.8        | 113.8 ± 70.5                    |
|                                | <b>Race</b>                    |                    |                      |                    |                      |                    |                      |                    |                      |                    |                      |                    |                      |                                 |
|                                | White                          | 83.6 ± 45.9        | 72.5 ± 45.9          | 76 ± 40.7          | 82.7 ± 50.5          | 87.7 ± 50.6        | 89.9 ± 43.4          | 100.2 ± 47.7       | 89.3 ± 90.1          | 123.6 ± 130.4      | 104.7 ± 76.1         | 95.7 ± 75.6        | 90.9 ± 123           | 90 ± 60.9                       |
|                                | Black                          | 102.6 ± 89.8       | 93.2 ± 77.1          | 98.3 ± 55          | 114.9 ± 71.1         | 116.1 ± 93.9       | 128.3 ± 97.8         | 119.7 ± 113.8      | 106.9 ± 52.7         | 163.2 ± 175.3      | 121.9 ± 23.8         | 114.3 ± 133        | 136.9 ± 192.2        | 114.2 ± 82.4                    |
|                                | Hispanic                       | 115.8 ± 96.6       | 92.8 ± 72.9          | 156.3 ± 139.8      | 79.6 ± 52.8          | 105.9 ± 103        | 78.7 ± 65.7          | 91.9 ± 98.9        | 81 ± 56              | 82.2 ± 24.4        | 86.1 ± 82.8          | 106.4 ± 176.8      | 107.7 ± 35.4         | 102.4 ± 75.8                    |
|                                | Other                          | 245.4 ± 173.3      | 184.8 ± 87.9         | 189.1 ± 133.4      | 137.2 ± 35.1         | 151.6 ± 132.8      | 145.8 ± 41.3         | 142.3 ± 217.2      | 168.5 ± 136.9        | 228.2 ± 186.5      | 206.7 ± 238.4        | 199.1 ± 214.4      | 154.3 ± 127.7        | 176.8 ± 127.5                   |
|                                | <b>Total</b>                   | 104.9 ± 71.7       | 90.7 ± 62.8          | 103 ± 44.6         | 90.8 ± 59.6          | 96.9 ± 4.7         | 97.6 ± 32.8          | 103.5 ± 42.5       | 94.5 ± 95.8          | 129.1 ± 122.4      | 109.1 ± 69.3         | 102.2 ± 94.9       | 97.7 ± 125.9         | 100.1 ± 68.8                    |
| <b>Sodium (mg/d)</b>           | <b>Overall by age</b>          | 3439 ± 576         |                      | 3471 ± 590         |                      | 3485 ± 515         |                      | 3434 ± 632         |                      | 3612 ± 322         |                      | 3520 ± 646         |                      | F: 3511 ± 599<br>M: 3446 ± 609  |
|                                | <b>Education</b>               |                    |                      |                    |                      |                    |                      |                    |                      |                    |                      |                    |                      |                                 |
|                                | <High-school                   | 3107 ± 319         | 3495 ± 816           | 3283 ± 666         | 3352 ± 521           | 3381 ± 403         | 3457 ± 674           | 3498 ± 560         | 3655 ± 443           | 3644 ± 836         | 3646 ± 522           | 4005 ± 775         | 3670 ± 635           | 3484 ± 691                      |
|                                | High-school                    | 3384 ± 309         | 3409 ± 668           | 3422 ± 590         | 3532 ± 531           | 3456 ± 509         | 3509 ± 574           | 3404 ± 609         | 3532 ± 659           | 3611 ± 504         | 3619 ± 596           | 3403 ± 522         | 3394 ± 492           | 3471 ± 565                      |
|                                | College                        | 3464 ± 534         | 3626 ± 597           | 3607 ± 351         | 3494 ± 409           | 3549 ± 323         | 3494 ± 491           | 3243 ± 479         | 3379 ± 545           | 3572 ± 1385        | 3590 ± 669           | 3289 ± 132         | 3629 ± 638           | 3493 ± 614                      |
|                                | <b>Race</b>                    |                    |                      |                    |                      |                    |                      |                    |                      |                    |                      |                    |                      |                                 |
|                                | White                          | 3331 ± 249         | 3438 ± 510           | 3406 ± 569         | 3488 ± 368           | 3462 ± 439         | 3450 ± 500           | 3334 ± 558         | 3447 ± 662           | 3476 ± 564         | 3589 ± 579           | 3496 ± 738         | 3474 ± 618           | 3441 ± 533                      |
|                                | Black                          | 3206 ± 568         | 3390 ± 895           | 3302 ± 628         | 3394 ± 355           | 3366 ± 895         | 3525 ± 715           | 3362 ± 482         | 3513 ± 1341          | 3727 ± 54          | 3704 ± 521           | 3701 ± 523         | 3588 ± 370           | 3434 ± 285                      |
|                                | Hispanic                       | 3296 ± 250         | 3402 ± 411           | 3405 ± 345         | 3332 ± 806           | 3419 ± 431         | 3461 ± 755           | 3369 ± 580         | 3531 ± 1019          | 3553 ± 734         | 3655 ± 597           | 3506 ± 483         | 3693 ± 254           | 3414 ± 549                      |
|                                | Other                          | 4134 ± 627         | 4210 ± 1118          | 4099 ± 978         | 3973 ± 674           | 3902 ± 625         | 3914 ± 900           | 3895 ± 625         | 4127 ± 755           | 5316 ± 4309        | 3916 ± 739           | 3910 ± 1007        | 4073 ± 1073          | 4093 ± 364                      |
|                                | <b>Total</b>                   | 3372 ± 467         | 3503 ± 659           | 3455 ± 677         | 3487 ± 491           | 3473 ± 448         | 3495 ± 568           | 3367 ± 570         | 3497 ± 678           | 3603 ± 1114        | 3619 ± 587           | 3529 ± 732         | 3514 ± 579           | 3480 ± 605                      |

<sup>a</sup> Dietary factors with probable or convincing evidence, based on criteria for assessing causality,<sup>11,13,14,86</sup> for etiologic relationships with cardiometabolic outcomes including coronary heart disease (CHD), stroke, type 2 diabetes, body mass index (BMI), or systolic blood pressure (SBP).<sup>9,10</sup> National Health and Nutrition Examination Survey (NHANES) data were used to inform nationally representative estimates of exposure to dietary factors, accounting for complex survey design and sampling weights as appropriate;<sup>3</sup> analyses are representative of the US population aged ≥25y. Specifically, sodium, macronutrient and energy intake were obtained from the Food and Nutrient Database for Dietary Studies, and intakes for food groups of interest were obtained from the Food Patterns Equivalents Database (FPED) for the 2012 estimate.<sup>87</sup> Servings in FPED were converted to grams per day. We estimated the mean and standard deviation (SD) of dietary intakes for the entire population and relevant sub-groups (e.g., by age/sex/race) using data from the 2009-2010 and 2011-2012 cycles (n=8,516); data from two recalls were used.<sup>88</sup> Means and SDs, correcting for within- versus between person variance were estimated for the strata of interest.<sup>89</sup> All factors were adjusted for energy using the residual method (2,000 kcal/d)<sup>89</sup> or as percent of energy (%E, macronutrients). Because distributions of many dietary factors are non-normal, a gamma distribution was utilized for each based on the mean and SD, which allows for both normal and highly skewed distributions. Optimal metrics and units for each dietary factor were defined to be consistent with definitions used in epidemiological studies that provided evidence on diet-disease relative risks.<sup>9</sup> Specifically, **fruits** were defined as: total fruits (g/d), excluding fruit juices and salted or pickled fruits; **vegetables**: total vegetables (g/d), including beans/legumes, and excluding salted, pickled, starchy vegetables (e.g., potatoes, corn) vegetables, or vegetable juices; **nuts/seeds**: total nuts and seeds (g/d); **whole grains**: total whole grain foods and grain-based products made with 100% whole grains or their flours (g/d); **red meats**: total red meats (g/d), excluding poultry, fish, eggs, and all processed meats; **processed meats**: total processed meat intake (g/d); **sugar-sweetened beverages (SSBs)**: total SSBs (servings [8 fluid ounces]/d) with ≥50 kcal per 8 oz (237 mL) serving, including carbonated soft drinks, fruit drinks, presweetened iced teas, sports drinks, energy drinks, and excluding 100% fruit and vegetable juices, non-caloric artificially-sweetened drinks, and alcoholic beverages (servings/d); **polyunsaturated fats (PUFA)**: total PUFA intake (%E/d); **saturated fats (SFA)**: total SFA intake (%E/d); **carbohydrates (carbs)**: total carbohydrate intake (%E/d); **seafood omega-3 fats**: total dietary eicosapentaenoic (EPA) + docosahexaenoic (DHA) (mg/d) intake, excluding supplements; **sodium**: total dietary sodium intake (mg/d).

<sup>b</sup> Population strata were assigned as follows: age (25-34, 35-44, 45-54, 55-64, 65-74, and ≥75 yrs), sex (male and female), education (<high-school: less than high school degree, high-school: high school degree/equivalent or some college, and College: ≥4-year college degree), and race/ethnicity (White: non-Hispanic White, Black: non-Hispanic Black, Hispanic: Mexican American/other Hispanic, and Other: other race/mixed race).

**eTable 8. US consumption levels for key dietary factors in 1999-2002 by population subgroups.**

| Dietary Factor <sup>a</sup>   | Population Strata <sup>b</sup> | Age                |                      |                    |                      |                    |                      |                    |                      |                    |                      |                    |                      | Both genders<br>mean ± SD            |
|-------------------------------|--------------------------------|--------------------|----------------------|--------------------|----------------------|--------------------|----------------------|--------------------|----------------------|--------------------|----------------------|--------------------|----------------------|--------------------------------------|
|                               |                                | 25-34 y            |                      | 35-44 y            |                      | 45-54 y            |                      | 55-64 y            |                      | 65-74 y            |                      | 75+ y              |                      |                                      |
|                               |                                | Males<br>mean ± SD | Females<br>mean ± SD |                                      |
| <b>Fruits (g/d)</b>           | <b>Overall by age</b>          | 63.1 ± 104.1       |                      | 81.9 ± 110.6       |                      | 97.6 ± 112.8       |                      | 110.8 ± 139.1      |                      | 138.8 ± 172.4      |                      | 136.5 ± 167.5      |                      | F: 97.5 ± 120.9<br>M: 95.2 ± 134.8   |
|                               | <b>Education</b>               |                    |                      |                    |                      |                    |                      |                    |                      |                    |                      |                    |                      |                                      |
|                               | <High-school                   | 45 ± 84            | 62.4 ± 107.1         | 67.3 ± 134.5       | 64.9 ± 119.1         | 74.1 ± 128.3       | 67.8 ± 116.2         | 64.5 ± 135.4       | 105.5 ± 180.9        | 138.6 ± 311.8      | 104.6 ± 159          | 109 ± 208.1        | 96.4 ± 118           | 77.4 ± 146                           |
|                               | High-school                    | 61.1 ± 117.9       | 46.7 ± 87            | 76 ± 112           | 66.3 ± 87.4          | 92.9 ± 110.5       | 87.6 ± 94.5          | 89.4 ± 121.2       | 105.4 ± 115.8        | 132.8 ± 161.4      | 148.6 ± 138.9        | 127.6 ± 170.7      | 154.8 ± 155          | 85.3 ± 116.3                         |
|                               | College                        | 68.9 ± 64          | 103.1 ± 110.7        | 109.8 ± 110.3      | 111.1 ± 104          | 126.7 ± 111.2      | 129.7 ± 111.8        | 157.6 ± 130.6      | 152.8 ± 137.4        | 154.6 ± 145.4      | 165.6 ± 103.3        | 222.4 ± 196.1      | 165.2 ± 168.4        | 121.6 ± 117.1                        |
|                               | <b>Race</b>                    |                    |                      |                    |                      |                    |                      |                    |                      |                    |                      |                    |                      |                                      |
|                               | White                          | 62 ± 85.8          | 66.5 ± 83.7          | 82.1 ± 91          | 75.6 ± 76.4          | 102.5 ± 99.1       | 96.4 ± 85.2          | 103.3 ± 105        | 117.3 ± 108.3        | 135.4 ± 143.4      | 148.9 ± 118.3        | 147.2 ± 184        | 142 ± 136.1          | 99.5 ± 105.2                         |
|                               | Black                          | 36.1 ± 77.4        | 46.9 ± 90.6          | 83.1 ± 170.5       | 79.2 ± 154.3         | 74.2 ± 139.7       | 83.2 ± 172.6         | 82.4 ± 238.9       | 82.3 ± 161.1         | 149.8 ± 509.7      | 76.8 ± 187.7         | 63.6 ± 177.8       | 71.7 ± 148.5         | 73.6 ± 172.9                         |
|                               | Hispanic                       | 73.3 ± 172.9       | 82 ± 162.6           | 95.2 ± 210.1       | 92.2 ± 154.8         | 103.7 ± 168.3      | 91.6 ± 160.9         | 128.4 ± 263.2      | 142.6 ± 269.5        | 162.7 ± 344.6      | 108.3 ± 210.2        | 123.5 ± 276        | 105.8 ± 192.5        | 98 ± 199.1                           |
|                               | Other                          | 29.1 ± 36.9        | 72.3 ± 87.7          | 106.8 ± 75.6       | 79.9 ± 76.6          | 114 ± 104.4        | 108.1 ± 101.4        | 141.9 ± 124.8      | 118.3 ± 122.1        | 213.2 ± 288.2      | 95.3 ± 93.3          | 114.2 ± 194.3      | 81 ± 259.6           | 93.9 ± 101.5                         |
| <b>Total</b>                  | 59.2 ± 103                     | 67.1 ± 101.7       | 85.3 ± 118.3         | 78.5 ± 101.5       | 100.3 ± 118          | 95.3 ± 107.9       | 105.2 ± 138.3        | 116.1 ± 139.6      | 140.1 ± 202.7        | 137.8 ± 145.8      | 140.1 ± 197.2        | 134.2 ± 148.3      | 96.4 ± 127.8         |                                      |
| <b>Vegetables (g/d)</b>       | <b>Overall by age</b>          | 163.7 ± 127.3      |                      | 173 ± 136          |                      | 180.8 ± 126.3      |                      | 193.7 ± 174.4      |                      | 204.9 ± 185.9      |                      | 179.9 ± 199.1      |                      | F: 191.9 ± 160.6<br>M: 166.7 ± 135.6 |
|                               | <b>Education</b>               |                    |                      |                    |                      |                    |                      |                    |                      |                    |                      |                    |                      |                                      |
|                               | <High-school                   | 140.8 ± 121        | 175.7 ± 181.4        | 155.7 ± 147.4      | 129.4 ± 164.7        | 165.8 ± 208.8      | 160.3 ± 154.1        | 134.7 ± 232.5      | 210.6 ± 268.4        | 170.8 ± 216.3      | 232.5 ± 254.8        | 152.4 ± 221.1      | 146.7 ± 145.9        | 160.4 ± 187.7                        |
|                               | High-school                    | 146.3 ± 101        | 161.1 ± 143.5        | 144.3 ± 104.6      | 163 ± 146.5          | 154.1 ± 102.8      | 184.4 ± 122.9        | 158.9 ± 122.7      | 207.1 ± 162          | 185.5 ± 155.3      | 212.9 ± 169.7        | 196.4 ± 273.2      | 203.4 ± 172.3        | 165.5 ± 134.2                        |
|                               | College                        | 179.2 ± 102.7      | 198.8 ± 129.9        | 210.3 ± 107.3      | 236.9 ± 138.4        | 202.7 ± 113.6      | 223.3 ± 111.9        | 207.1 ± 117.4      | 250.3 ± 168.1        | 170.7 ± 121        | 281.4 ± 144.1        | 177.8 ± 161.6      | 198.5 ± 227.9        | 209.8 ± 127.9                        |
|                               | <b>Race</b>                    |                    |                      |                    |                      |                    |                      |                    |                      |                    |                      |                    |                      |                                      |
|                               | White                          | 156.7 ± 88.1       | 173.8 ± 125.6        | 164.6 ± 90.3       | 188.5 ± 130.7        | 172.7 ± 100.3      | 190.1 ± 108.1        | 168.6 ± 111.2      | 214.8 ± 146.2        | 169 ± 124.5        | 224.4 ± 149.6        | 175.4 ± 228.3      | 191 ± 156.9          | 181.2 ± 124.8                        |
|                               | Black                          | 118.8 ± 117.1      | 137.1 ± 150.7        | 154.1 ± 165.5      | 117.5 ± 144.6        | 112.3 ± 144.5      | 155.9 ± 148.6        | 132.5 ± 187.4      | 244.3 ± 333.5        | 196.3 ± 305.6      | 242.7 ± 323          | 168.6 ± 269.6      | 136.4 ± 226.8        | 149.5 ± 191.6                        |
|                               | Hispanic                       | 176.2 ± 160.1      | 200.2 ± 184          | 194.2 ± 193.1      | 175 ± 163.6          | 196 ± 201.7        | 203 ± 184.7          | 164.6 ± 264.5      | 214.3 ± 309.8        | 230.7 ± 403.7      | 194.9 ± 298.7        | 193.1 ± 319.5      | 124.3 ± 223.5        | 190 ± 211.8                          |
|                               | Other                          | 92.7 ± 66.9        | 203 ± 172.8          | 173 ± 98.7         | 233.5 ± 123          | 189.8 ± 111.8      | 228 ± 95.6           | 254.1 ± 275.4      | 208.9 ± 103.2        | 291.5 ± 121.1      | 363.7 ± 208.8        | 231.1 ± 104.8      | 120.5 ± 179.1        | 201.5 ± 137.6                        |
| <b>Total</b>                  | 152.3 ± 107.5                  | 175.5 ± 146.8      | 167.9 ± 116.9        | 178.1 ± 153.7      | 170.1 ± 123.1        | 190.5 ± 128.5      | 168.2 ± 150.7        | 217.7 ± 191.1      | 178.2 ± 167.4        | 227.6 ± 194.1      | 176.8 ± 242.5        | 182 ± 171.6        | 179.8 ± 149.5        |                                      |
| <b>Nuts &amp; seeds (g/d)</b> | <b>Overall by age</b>          | 5.2 ± 12.5         |                      | 7.5 ± 14.8         |                      | 7.7 ± 14.3         |                      | 8.2 ± 18.3         |                      | 8.3 ± 25.3         |                      | 7.8 ± 27.6         |                      | F: 7 ± 17.7<br>M: 7.6 ± 16.4         |
|                               | <b>Education</b>               |                    |                      |                    |                      |                    |                      |                    |                      |                    |                      |                    |                      |                                      |
|                               | <High-school                   | 2.3 ± 9.3          | 7.6 ± 17.8           | 9.1 ± 25.5         | 2.9 ± 10             | 5 ± 20.7           | 4.6 ± 14.3           | 5.6 ± 18.4         | 5.2 ± 13.4           | 3.4 ± 13.4         | 2.9 ± 12.8           | 4.7 ± 19           | 10.4 ± 42.2          | 5.1 ± 20                             |
|                               | High-school                    | 4.3 ± 11.1         | 4.4 ± 11             | 6 ± 12.8           | 6.4 ± 12.4           | 8.6 ± 14.1         | 7.4 ± 13.6           | 9.8 ± 17.7         | 6.8 ± 16.2           | 8.8 ± 17.1         | 8.3 ± 31.9           | 7.3 ± 20.2         | 7.2 ± 16.1           | 6.7 ± 15.7                           |
|                               | College                        | 7.2 ± 12.1         | 6.9 ± 14.2           | 9.5 ± 13.2         | 11.5 ± 15.7          | 11 ± 14.8          | 6.9 ± 9.8            | 11.1 ± 17.1        | 11 ± 20.7            | 16 ± 20.2          | 15.6 ± 15.6          | 9.8 ± 33.8         | 7.7 ± 19.7           | 9.8 ± 15.4                           |
|                               | <b>Race</b>                    |                    |                      |                    |                      |                    |                      |                    |                      |                    |                      |                    |                      |                                      |
|                               | White                          | 5.3 ± 10.2         | 6.1 ± 11.6           | 8.5 ± 12.9         | 8.2 ± 11.3           | 8.6 ± 11.7         | 7.5 ± 10.6           | 9.9 ± 14.9         | 7.9 ± 14.3           | 9.9 ± 15.8         | 7.4 ± 14.4           | 7.3 ± 22.9         | 6.9 ± 15.3           | 7.8 ± 13.3                           |
|                               | Black                          | 3.4 ± 13.1         | 3.7 ± 9.4            | 4.7 ± 14.9         | 4.9 ± 16.3           | 7.6 ± 29.7         | 5.5 ± 18.8           | 7.8 ± 25           | 5.2 ± 15.7           | 5.7 ± 24.8         | 4.4 ± 24.3           | 7.5 ± 31.6         | 33.5 ± 122.8         | 6 ± 26.5                             |
|                               | Hispanic                       | 2.8 ± 10           | 7 ± 20.8             | 6.6 ± 23.6         | 5.7 ± 22.1           | 12.8 ± 29          | 5.4 ± 22.8           | 3.5 ± 22.4         | 3 ± 15.9             | 5 ± 30.6           | 12.4 ± 138           | 0.7 ± 9.2          | 3.8 ± 18.3           | 6.1 ± 31.2                           |
|                               | Other                          | 4.3 ± 9.4          | 2.3 ± 8.6            | 6.9 ± 9.5          | 3.9 ± 9.2            | 0.4 ± 0.9          | 1.7 ± 3.9            | 11.4 ± 23.7        | 13.2 ± 27.1          | 4.9 ± 9.9          | 7.8 ± 8.8            | 1 ± 3.9            | 3.7 ± 4.6            | 5 ± 12.6                             |
| <b>Total</b>                  | 4.6 ± 11.5                     | 5.8 ± 13.4         | 7.7 ± 15.5           | 7.3 ± 14.1         | 8.8 ± 15.6           | 6.7 ± 13           | 9.2 ± 18.6           | 7.3 ± 18           | 9.1 ± 19.2           | 7.6 ± 28.7         | 6.9 ± 24.2           | 8.4 ± 28.1         | 7.3 ± 17.1           |                                      |
| <b>Whole grains (g/d)</b>     | <b>Overall by age</b>          | 10.2 ± 17.1        |                      | 12.8 ± 20.3        |                      | 15.5 ± 21.5        |                      | 18.4 ± 29          |                      | 19.6 ± 28          |                      | 23.5 ± 34.4        |                      | F: 16 ± 23.8<br>M: 14.6 ± 23.4       |
|                               | <b>Education</b>               |                    |                      |                    |                      |                    |                      |                    |                      |                    |                      |                    |                      |                                      |

**eTable 8. US consumption levels for key dietary factors in 1999-2002 by population subgroups (continued)**

| Dietary Factor <sup>a</sup>         | Population Strata <sup>b</sup> | Age          |             |             |             |             |              |              |             |              |             |              |             |                                  |
|-------------------------------------|--------------------------------|--------------|-------------|-------------|-------------|-------------|--------------|--------------|-------------|--------------|-------------|--------------|-------------|----------------------------------|
|                                     |                                | 25-34 y      |             | 35-44 y     |             | 45-54 y     |              | 55-64 y      |             | 65-74 y      |             | 75+ y        |             | 25+ y                            |
|                                     |                                | Males        | Females     | Males       | Females     | Males       | Females      | Males        | Females     | Males        | Females     | Males        | Females     | Both genders                     |
|                                     |                                | mean ± SD    | mean ± SD   | mean ± SD   | mean ± SD   | mean ± SD   | mean ± SD    | mean ± SD    | mean ± SD   | mean ± SD    | mean ± SD   | mean ± SD    | mean ± SD   | mean ± SD                        |
|                                     | <High-school                   | 3.8 ± 15.4   | 5.6 ± 11.4  | 6.4 ± 16.3  | 5.6 ± 14    | 9.2 ± 17.5  | 7 ± 15.7     | 11.9 ± 32.9  | 15 ± 32.7   | 18.5 ± 38.7  | 13.3 ± 29.6 | 22.9 ± 47.2  | 14.5 ± 26.8 | 10.2 ± 24.4                      |
|                                     | High-school                    | 9.4 ± 14.4   | 8.8 ± 15.2  | 8.7 ± 15.3  | 13.9 ± 21.4 | 12.6 ± 17.2 | 17.2 ± 22.7  | 17.2 ± 26    | 18.6 ± 25   | 24.3 ± 30.4  | 17 ± 21.2   | 25.3 ± 35.3  | 24.5 ± 27.5 | 14.4 ± 21.4                      |
|                                     | College                        | 12.7 ± 14    | 19.6 ± 24.2 | 18.3 ± 19   | 20.2 ± 22.9 | 17.7 ± 21.6 | 24.6 ± 21.4  | 26.4 ± 31.9  | 18.8 ± 20.6 | 21.9 ± 23.9  | 30.6 ± 21.6 | 39.2 ± 50.3  | 28.8 ± 32.6 | 20.6 ± 23.3                      |
|                                     | <b>Race</b>                    |              |             |             |             |             |              |              |             |              |             |              |             |                                  |
|                                     | White                          | 9.5 ± 11.4   | 11.5 ± 15.3 | 12.7 ± 14.4 | 15.7 ± 18.5 | 15.2 ± 17.3 | 19.1 ± 18.9  | 19.2 ± 24.2  | 18.3 ± 20   | 23 ± 25.1    | 18.8 ± 18.4 | 27.6 ± 38.5  | 22.1 ± 25.5 | 16.6 ± 19.8                      |
|                                     | Black                          | 8.6 ± 17.3   | 10.5 ± 24.4 | 10.7 ± 32.7 | 11.8 ± 24.9 | 7.9 ± 18.8  | 7.6 ± 17.9   | 10 ± 38.9    | 12.2 ± 28   | 20.2 ± 53.2  | 10.7 ± 33.3 | 14.8 ± 44.5  | 14.5 ± 42.7 | 10.7 ± 27.9                      |
|                                     | Hispanic                       | 7.4 ± 25.6   | 8.5 ± 23.6  | 6.1 ± 17.6  | 12.7 ± 32   | 9.6 ± 23.5  | 13.8 ± 29.2  | 23.5 ± 67.9  | 12.2 ± 39.3 | 9.3 ± 46.5   | 14.5 ± 62.3 | 26.8 ± 96.6  | 17.5 ± 43.4 | 11 ± 33                          |
|                                     | Other                          | 7.6 ± 12.3   | 26.8 ± 24.6 | 9.8 ± 11.7  | 3.6 ± 6.4   | 7.1 ± 11.5  | 18 ± 25.9    | 23.9 ± 36.3  | 36.2 ± 37   | 28.5 ± 34.7  | 19.1 ± 22.5 | 58.2 ± 80.4  | 7.8 ± 18.1  | 16.9 ± 24.3                      |
|                                     | <b>Total</b>                   | 8.9 ± 14.9   | 11.6 ± 19.2 | 11.4 ± 17.9 | 14.3 ± 22.5 | 13.6 ± 19.9 | 17.2 ± 22.7  | 18.9 ± 31.6  | 17.9 ± 26.5 | 21.8 ± 31.7  | 17.7 ± 24.8 | 27.2 ± 43.8  | 21.1 ± 28.3 | 15.3 ± 23.6                      |
| <b>Red meats, unprocessed (g/d)</b> | <b>Overall by age</b>          | 52.3 ± 58.5  |             | 52.1 ± 55.3 |             | 50.5 ± 55.5 |              | 53.9 ± 64.5  |             | 46.5 ± 68.8  |             | 40.5 ± 67.7  |             | F: 43 ± 56.5<br>M: 58.5 ± 64.1   |
|                                     | <b>Education</b>               |              |             |             |             |             |              |              |             |              |             |              |             |                                  |
|                                     | <High-school                   | 74.7 ± 64.9  | 61.3 ± 65.5 | 76.7 ± 83.7 | 45 ± 71.7   | 60.7 ± 86.7 | 55.4 ± 95.4  | 65.1 ± 93.1  | 51.5 ± 72.3 | 55.1 ± 111.6 | 49.3 ± 83   | 62 ± 113.3   | 32 ± 61.7   | 56.1 ± 82.6                      |
|                                     | High-school                    | 50.6 ± 50.5  | 40 ± 54.1   | 59.4 ± 53.7 | 47.2 ± 54.9 | 67.9 ± 58.6 | 44.6 ± 43.9  | 63.5 ± 60.9  | 49.9 ± 56.3 | 58 ± 66.9    | 37.8 ± 53.1 | 50.4 ± 74    | 33.2 ± 48.1 | 49.8 ± 55.7                      |
|                                     | College                        | 74.8 ± 58.2  | 37.9 ± 56.1 | 51.2 ± 45   | 38.2 ± 35.3 | 36 ± 35     | 35.9 ± 40.3  | 53.1 ± 61    | 38.5 ± 44.2 | 42.6 ± 55.8  | 36.9 ± 39.3 | 42.1 ± 61.7  | 32.9 ± 63.2 | 44.4 ± 48.7                      |
|                                     | <b>Race</b>                    |              |             |             |             |             |              |              |             |              |             |              |             |                                  |
|                                     | White                          | 54.6 ± 45.2  | 43.5 ± 49.9 | 57.7 ± 43.3 | 43.8 ± 40.6 | 54.4 ± 45.5 | 41.2 ± 37.5  | 62.5 ± 56.5  | 48.7 ± 46   | 52.5 ± 59.5  | 40.7 ± 47.5 | 51.4 ± 74    | 33.4 ± 50.6 | 48.9 ± 48.7                      |
|                                     | Black                          | 65.8 ± 73.7  | 45.8 ± 67.5 | 60.3 ± 92.6 | 40.2 ± 70.5 | 61.7 ± 92.1 | 44.5 ± 63.6  | 60.3 ± 98.8  | 38.1 ± 81.8 | 48.4 ± 158.1 | 41.2 ± 89.7 | 63.9 ± 160.8 | 22.4 ± 62   | 50 ± 85.6                        |
|                                     | Hispanic                       | 69.1 ± 71.8  | 44.3 ± 73.7 | 69.4 ± 90.4 | 43.4 ± 80.5 | 65.9 ± 92.1 | 57.2 ± 139.6 | 51.6 ± 108.5 | 59 ± 102.9  | 65.5 ± 137.1 | 46.2 ± 127  | 59.3 ± 154.4 | 31 ± 69.9   | 56.5 ± 99.5                      |
|                                     | Other                          | 105.5 ± 58.4 | 27.3 ± 39.7 | 63.8 ± 49.2 | 74.4 ± 49.2 | 87.8 ± 55.1 | 54.8 ± 43.8  | 40.3 ± 47.8  | 31.4 ± 33.8 | 31.4 ± 61.9  | 36.2 ± 36.1 | 74.7 ± 144.5 | 46.1 ± 63.2 | 59.9 ± 54.7                      |
|                                     | <b>Total</b>                   | 61.3 ± 56.9  | 43.1 ± 57.4 | 59.9 ± 56.9 | 44.3 ± 52.8 | 57.4 ± 57.6 | 44.2 ± 53.3  | 60.4 ± 69.9  | 47.7 ± 58.5 | 52.8 ± 77.8  | 41.1 ± 60.7 | 53 ± 86.4    | 32.6 ± 54.5 | 50.5 ± 60.6                      |
| <b>Processed meats (g/d)</b>        | <b>Overall by age</b>          | 31.2 ± 44.7  |             | 31.1 ± 40.4 |             | 29.5 ± 38.7 |              | 28.7 ± 43.9  |             | 29.8 ± 47.8  |             | 26 ± 48.2    |             | F: 23.9 ± 37.3<br>M: 36.3 ± 48.7 |
|                                     | <b>Education</b>               |              |             |             |             |             |              |              |             |              |             |              |             |                                  |
|                                     | <High-school                   | 33.3 ± 48    | 24.4 ± 47.7 | 36.3 ± 60.4 | 32.8 ± 54.3 | 28.2 ± 46.5 | 23.6 ± 40.1  | 42.3 ± 67.5  | 20.2 ± 44   | 41.8 ± 76.8  | 24.6 ± 54.2 | 33.6 ± 71.3  | 28.4 ± 50.6 | 31.4 ± 57.4                      |
|                                     | High-school                    | 38.2 ± 46.4  | 28.2 ± 41.6 | 40.2 ± 39.1 | 25.7 ± 34.5 | 41 ± 45.5   | 24.2 ± 31.7  | 39.6 ± 49    | 23.3 ± 31.1 | 36.1 ± 48    | 24.7 ± 33.6 | 27.6 ± 48.6  | 20.7 ± 35.8 | 31.1 ± 40.3                      |
|                                     | College                        | 37.4 ± 39.3  | 20.5 ± 34.2 | 29.9 ± 37.5 | 21.5 ± 29   | 37.5 ± 37.9 | 15.3 ± 21.8  | 26.1 ± 40.9  | 19.7 ± 27.2 | 24.1 ± 30.5  | 33.5 ± 50.3 | 30.6 ± 53.9  | 16.8 ± 33.9 | 26.2 ± 36.2                      |
|                                     | <b>Race</b>                    |              |             |             |             |             |              |              |             |              |             |              |             |                                  |
|                                     | White                          | 41.9 ± 40.6  | 26.7 ± 36.1 | 38.7 ± 34.4 | 26.8 ± 29.2 | 40.5 ± 38.2 | 22.3 ± 25    | 39.4 ± 42.9  | 24.2 ± 27.5 | 34.5 ± 41.3  | 28.3 ± 35.5 | 31.3 ± 52.6  | 24.5 ± 38.1 | 31.9 ± 37.1                      |
|                                     | Black                          | 31.9 ± 46    | 30 ± 48.5   | 40.6 ± 59.7 | 33 ± 54.7   | 25.1 ± 46.5 | 26.6 ± 52.8  | 32.2 ± 71    | 18.8 ± 40.7 | 41.2 ± 87.8  | 24.3 ± 59.9 | 42 ± 104.5   | 25.8 ± 73.3 | 30.8 ± 57.2                      |
|                                     | Hispanic                       | 28.5 ± 54.5  | 18.6 ± 45.6 | 31.3 ± 71.5 | 16.3 ± 35.7 | 35.4 ± 63.5 | 13.4 ± 37    | 22 ± 58.6    | 11.6 ± 40.8 | 25.5 ± 78    | 10.1 ± 53   | 8.6 ± 39.7   | 5.5 ± 28.6  | 21.7 ± 57.1                      |
|                                     | Other                          | 19.2 ± 16.4  | 18.1 ± 32   | 9.6 ± 18.3  | 10.1 ± 15   | 32.1 ± 40.4 | 20.8 ± 25.6  | 10 ± 26.3    | 14.8 ± 29.5 | 38.6 ± 87    | 13.5 ± 20.9 | 9.6 ± 24.8   | 24.2 ± 49.2 | 17.1 ± 27.4                      |
|                                     | <b>Total</b>                   | 37.1 ± 45.7  | 25.1 ± 40.6 | 36.5 ± 43.4 | 25.7 ± 36.4 | 38.1 ± 45.1 | 21.6 ± 31    | 36 ± 52      | 21.7 ± 33.7 | 34.5 ± 52.7  | 25.8 ± 43.2 | 30.5 ± 58.1  | 23.3 ± 41.7 | 29.9 ± 43.5                      |
| <b>SSB (servings (8 oz)/d)</b>      | <b>Overall by age</b>          | 2.38 ± 2.13  |             | 1.82 ± 1.71 |             | 1.35 ± 1.53 |              | 1.14 ± 1.54  |             | 0.71 ± 1.25  |             | 0.65 ± 1.21  |             | F: 1.35 ± 1.77<br>M: 1.7 ± 1.83  |
|                                     | <b>Education</b>               |              |             |             |             |             |              |              |             |              |             |              |             |                                  |
|                                     | <High-school                   | 3.06 ± 2.24  | 2.66 ± 3.31 | 2.49 ± 2.09 | 2.05 ± 2.64 | 1.63 ± 2.05 | 1.46 ± 1.7   | 1.66 ± 2.49  | 1.25 ± 1.98 | 1.12 ± 2.17  | 0.71 ± 1.37 | 0.84 ± 1.74  | 0.81 ± 1.24 | 1.86 ± 2.44                      |
|                                     | High-school                    | 2.78 ± 1.78  | 2.44 ± 2.41 | 2.38 ± 1.81 | 1.86 ± 1.69 | 1.57 ± 1.64 | 1.35 ± 1.45  | 1.33 ± 1.57  | 1.07 ± 1.34 | 0.91 ± 1.4   | 0.49 ± 0.78 | 0.68 ± 1.29  | 0.55 ± 1    | 1.83 ± 1.87                      |
|                                     | College                        | 1.9 ± 1.31   | 1.36 ± 1.81 | 1.25 ± 1.09 | 0.85 ± 0.97 | 0.85 ± 1.03 | 1.22 ± 1.32  | 0.87 ± 1.05  | 0.63 ± 0.77 | 0.76 ± 1.07  | 0.22 ± 0.46 | 0.34 ± 0.76  | 0.51 ± 1.02 | 1.08 ± 1.25                      |
|                                     | <b>Race</b>                    |              |             |             |             |             |              |              |             |              |             |              |             |                                  |



**eTable 8. US consumption levels for key dietary factors in 1999-2002 by population subgroups (continued)**

| Dietary Factor <sup>a</sup>      | Population Strata <sup>b</sup> | Age               |                    |                   |                   |                    |                    |                    |                   |                    |                    |                    |                   |                                 |
|----------------------------------|--------------------------------|-------------------|--------------------|-------------------|-------------------|--------------------|--------------------|--------------------|-------------------|--------------------|--------------------|--------------------|-------------------|---------------------------------|
|                                  |                                | 25-34 y           |                    | 35-44 y           |                   | 45-54 y            |                    | 55-64 y            |                   | 65-74 y            |                    | 75+ y              |                   | 25+ y                           |
|                                  |                                | Males             | Females            | Males             | Females           | Males              | Females            | Males              | Females           | Males              | Females            | Males              | Females           | Both genders                    |
|                                  |                                | mean ± SD         | mean ± SD          | mean ± SD         | mean ± SD         | mean ± SD          | mean ± SD          | mean ± SD          | mean ± SD         | mean ± SD          | mean ± SD          | mean ± SD          | mean ± SD         |                                 |
|                                  | White                          | 2.64 ± 1.54       | 2.32 ± 2.33        | 1.97 ± 1.36       | 1.49 ± 1.31       | 1.23 ± 1.29        | 1.26 ± 1.19        | 1.19 ± 1.26        | 0.91 ± 1.04       | 0.9 ± 1.2          | 0.43 ± 0.63        | 0.59 ± 1.18        | 0.62 ± 1.01       | 1.42 ± 1.5                      |
|                                  | Black                          | 2.6 ± 2.01        | 2.39 ± 2.23        | 2.42 ± 2.48       | 1.92 ± 2.09       | 2.47 ± 2.49        | 2.2 ± 2.58         | 1.96 ± 3.23        | 1.74 ± 2.42       | 1.4 ± 3.12         | 1.18 ± 2.14        | 1.64 ± 2.6         | 0.98 ± 1.68       | 2.1 ± 2.49                      |
|                                  | Hispanic                       | 2.4 ± 1.87        | 1.47 ± 1.87        | 1.85 ± 1.98       | 1.66 ± 2.53       | 1.39 ± 1.87        | 1.02 ± 1.97        | 1.54 ± 2.79        | 0.9 ± 1.73        | 0.9 ± 2.62         | 0.71 ± 2.15        | 0.88 ± 2.29        | 0.59 ± 1.14       | 1.51 ± 2.24                     |
|                                  | Other                          | 3.06 ± 1.89       | 1.8 ± 2.36         | 2.58 ± 1.78       | 2.45 ± 2.12       | 0.89 ± 0.9         | 1.43 ± 0.85        | 0.43 ± 0.77        | 1.13 ± 1.58       | 0 ± 0              | 0.55 ± 0.64        | 0.59 ± 0.75        | 0.6 ± 1.78        | 1.76 ± 1.8                      |
|                                  | <b>Total</b>                   | <b>2.62 ± 1.8</b> | <b>2.14 ± 2.44</b> | <b>2.04 ± 1.7</b> | <b>1.61 ± 1.7</b> | <b>1.36 ± 1.57</b> | <b>1.34 ± 1.48</b> | <b>1.26 ± 1.66</b> | <b>1.02 ± 1.4</b> | <b>0.93 ± 1.56</b> | <b>0.52 ± 0.93</b> | <b>0.67 ± 1.38</b> | <b>0.65 ± 1.1</b> | <b>1.52 ± 1.8</b>               |
| <b>Polyunsaturated fats (%E)</b> | <b>Overall by age</b>          | 6.5 ± 2.5         |                    | 6.8 ± 2.5         |                   | 7.1 ± 2.7          |                    | 7.3 ± 3.1          |                   | 7.2 ± 3.5          |                    | 7.3 ± 3.5          |                   | F: 7.2 ± 3<br>M: 6.7 ± 2.7      |
|                                  | <b>Education</b>               |                   |                    |                   |                   |                    |                    |                    |                   |                    |                    |                    |                   |                                 |
|                                  | <High-school                   | 6.2 ± 2.5         | 6.7 ± 3.5          | 6.1 ± 2.5         | 6.4 ± 2.8         | 6.3 ± 3.2          | 7 ± 3.1            | 6.8 ± 3.5          | 6.7 ± 3.3         | 6.7 ± 3.9          | 7 ± 3.6            | 6.5 ± 3.6          | 7.4 ± 3.7         | 6.6 ± 3.3                       |
|                                  | High-school                    | 6.7 ± 2.1         | 6.5 ± 2.7          | 6.3 ± 2.2         | 7.2 ± 2.6         | 6.9 ± 2.3          | 7.7 ± 2.9          | 7.5 ± 3            | 7.5 ± 3.3         | 6.7 ± 3            | 7.8 ± 3.2          | 7.1 ± 3.7          | 7.4 ± 2.7         | 7 ± 2.7                         |
|                                  | College                        | 6.1 ± 2.1         | 6.7 ± 2.4          | 6.9 ± 2.2         | 7.4 ± 2.6         | 7.1 ± 2.3          | 7 ± 2.2            | 7.2 ± 2.3          | 7.7 ± 2.5         | 7.6 ± 3.6          | 7.2 ± 2.2          | 7.1 ± 3.9          | 8.7 ± 4.8         | 7 ± 2.5                         |
|                                  | <b>Race</b>                    |                   |                    |                   |                   |                    |                    |                    |                   |                    |                    |                    |                   |                                 |
|                                  | White                          | 6.5 ± 1.8         | 6.6 ± 2.4          | 6.4 ± 1.8         | 7 ± 2.1           | 6.9 ± 2            | 7.4 ± 2.2          | 7.5 ± 2.4          | 7.5 ± 2.4         | 7.1 ± 2.9          | 7.6 ± 2.7          | 6.9 ± 3.4          | 7.6 ± 2.9         | 7 ± 2.4                         |
|                                  | Black                          | 6.8 ± 3.1         | 6.7 ± 3.2          | 6.7 ± 3.1         | 7.7 ± 3.6         | 6.5 ± 3.1          | 7.2 ± 4.1          | 6.4 ± 4.5          | 8.1 ± 6.1         | 6.5 ± 4.6          | 7.4 ± 4.5          | 6.1 ± 5            | 8 ± 4.2           | 7 ± 4                           |
|                                  | Hispanic                       | 6.2 ± 2.9         | 6.7 ± 3.2          | 6.7 ± 3.3         | 7.3 ± 4.2         | 6.9 ± 4.6          | 7 ± 4              | 6.3 ± 4.2          | 6.3 ± 4.8         | 6.1 ± 5.5          | 6.7 ± 4.6          | 6.7 ± 5.8          | 6.5 ± 6.5         | 6.7 ± 4.1                       |
|                                  | Other                          | 5.3 ± 1.8         | 5.6 ± 2.6          | 6.9 ± 2.3         | 6.7 ± 2           | 7.4 ± 2            | 7.7 ± 3.2          | 6.2 ± 2.4          | 6.6 ± 2.9         | 7.1 ± 2.9          | 6.7 ± 1.9          | 8.3 ± 5.5          | 6.4 ± 2.1         | 6.6 ± 2.7                       |
|                                  | <b>Total</b>                   | <b>6.4 ± 2.2</b>  | <b>6.6 ± 2.8</b>   | <b>6.5 ± 2.3</b>  | <b>7.1 ± 2.7</b>  | <b>6.9 ± 2.5</b>   | <b>7.4 ± 2.8</b>   | <b>7.3 ± 3</b>     | <b>7.4 ± 3.3</b>  | <b>7 ± 3.6</b>     | <b>7.5 ± 3.3</b>   | <b>6.9 ± 3.8</b>   | <b>7.5 ± 3.3</b>  | <b>7 ± 2.9</b>                  |
| <b>Saturated fats (%E)</b>       | <b>Overall by age</b>          | 10.7 ± 3.1        |                    | 10.9 ± 3          |                   | 10.8 ± 3           |                    | 10.7 ± 3.4         |                   | 10.5 ± 3.9         |                    | 10.3 ± 3.8         |                   | F: 10.7 ± 3.3<br>M: 10.8 ± 3.2  |
|                                  | <b>Education</b>               |                   |                    |                   |                   |                    |                    |                    |                   |                    |                    |                    |                   |                                 |
|                                  | <High-school                   | 9.9 ± 3.1         | 10.4 ± 3.6         | 10.6 ± 4.6        | 11.2 ± 4.4        | 9.6 ± 3.7          | 10.9 ± 4.1         | 10.6 ± 4.7         | 10.4 ± 4.4        | 11.1 ± 5.1         | 10.1 ± 4.2         | 11.2 ± 5.1         | 10 ± 3.9          | 10.5 ± 4.3                      |
|                                  | High-school                    | 10.9 ± 2.5        | 10.6 ± 3.4         | 11.3 ± 3          | 10.8 ± 2.6        | 11.2 ± 2.7         | 11.1 ± 2.8         | 11.1 ± 3           | 11 ± 3            | 10.3 ± 3.5         | 10.8 ± 3.4         | 10.6 ± 3.8         | 10.3 ± 3.1        | 10.9 ± 3                        |
|                                  | College                        | 10.9 ± 2.4        | 10.9 ± 3.2         | 10.6 ± 2.5        | 10.4 ± 2.5        | 10.3 ± 2.5         | 10.7 ± 3           | 10.4 ± 2.7         | 10.3 ± 3          | 10.6 ± 3.4         | 9.8 ± 2.9          | 9.9 ± 3.9          | 9.3 ± 3.5         | 10.5 ± 2.9                      |
|                                  | <b>Race</b>                    |                   |                    |                   |                   |                    |                    |                    |                   |                    |                    |                    |                   |                                 |
|                                  | White                          | 11 ± 2.2          | 10.3 ± 3           | 11.5 ± 2.6        | 11.1 ± 2.9        | 11 ± 2.3           | 9.8 ± 4.7          | 11.3 ± 2.5         | 8.4 ± 6.8         | 10.7 ± 3.2         | 10.7 ± 6.6         | 10.8 ± 4           | 8.8 ± 2.7         | 11 ± 2.7                        |
|                                  | Black                          | 10.4 ± 3.5        | 10.7 ± 2.9         | 9.6 ± 3.8         | 11.3 ± 2.4        | 9 ± 4              | 10.1 ± 4.6         | 9.4 ± 5.5          | 9.5 ± 6.9         | 10.1 ± 6.3         | 11.1 ± 5.7         | 9.5 ± 5.2          | 9.1 ± 4.3         | 9.9 ± 4.3                       |
|                                  | Hispanic                       | 10.1 ± 3.8        | 10.8 ± 2.6         | 10 ± 3.8          | 9.6 ± 5.9         | 10.6 ± 4.2         | 10.2 ± 4.3         | 9.1 ± 5.5          | 10.3 ± 4.1        | 10.6 ± 7.4         | 8 ± 1.9            | 10.2 ± 5.7         | 9.5 ± 2.2         | 10.2 ± 4.9                      |
|                                  | Other                          | 10.2 ± 1.8        | 11 ± 2.3           | 8.8 ± 2.5         | 9.8 ± 4.2         | 9.5 ± 3.1          | 10.4 ± 3.6         | 6.8 ± 2.9          | 10.4 ± 3.7        | 6.5 ± 2.3          | 8.2 ± 3.7          | 9.5 ± 4.7          | 10.1 ± 3.5        | 9 ± 2.9                         |
|                                  | <b>Total</b>                   | <b>10.7 ± 2.7</b> | <b>10.7 ± 3.4</b>  | <b>11 ± 3.1</b>   | <b>10.8 ± 2.9</b> | <b>10.7 ± 2.9</b>  | <b>11 ± 3.1</b>    | <b>10.7 ± 3.4</b>  | <b>10.7 ± 3.4</b> | <b>10.6 ± 4</b>    | <b>10.4 ± 3.7</b>  | <b>10.7 ± 4.4</b>  | <b>10.1 ± 3.5</b> | <b>10.7 ± 3.3</b>               |
| <b>Carbohydrates (%E)</b>        | <b>Overall by age</b>          | 51.9 ± 9.6        |                    | 50 ± 9.3          |                   | 49.2 ± 9.3         |                    | 49.4 ± 10.5        |                   | 50.5 ± 11.6        |                    | 52.6 ± 11.3        |                   | F: 51.6 ± 10.2<br>M: 49.2 ± 9.9 |
|                                  | <b>Education</b>               |                   |                    |                   |                   |                    |                    |                    |                   |                    |                    |                    |                   |                                 |
|                                  | <High-school                   | 51 ± 10.5         | 54.1 ± 11.7        | 49.5 ± 13.1       | 50.9 ± 12.8       | 50.7 ± 13.7        | 48.9 ± 11.7        | 49.2 ± 14.3        | 53.2 ± 12.3       | 49.6 ± 14.8        | 52.5 ± 13          | 50.2 ± 15.4        | 54.6 ± 12.4       | 51.6 ± 13.2                     |
|                                  | High-school                    | 50.1 ± 7.9        | 53.6 ± 11          | 49.6 ± 8.4        | 50.7 ± 8.6        | 47.3 ± 8.3         | 50.3 ± 8.9         | 46.8 ± 9.3         | 50.2 ± 9.5        | 49.5 ± 10.4        | 50.8 ± 10.3        | 51.2 ± 11.2        | 53.1 ± 8.6        | 50.6 ± 9.4                      |
|                                  | College                        | 51.1 ± 7.3        | 52.3 ± 9.6         | 48.5 ± 7.8        | 51 ± 8.6          | 48.1 ± 8           | 51.4 ± 8.5         | 48.2 ± 9.1         | 49.5 ± 8.6        | 48.8 ± 10.8        | 51.3 ± 8.6         | 52.1 ± 11.4        | 52.9 ± 9          | 50.1 ± 8.8                      |
|                                  | <b>Race</b>                    |                   |                    |                   |                   |                    |                    |                    |                   |                    |                    |                    |                   |                                 |
|                                  | White                          | 49.8 ± 6.7        | 52.6 ± 9.2         | 48.5 ± 7.2        | 50.7 ± 7.3        | 47.5 ± 7.2         | 49.7 ± 7.1         | 46.8 ± 7.7         | 49.9 ± 7.5        | 49.3 ± 9.5         | 50.7 ± 8.8         | 50.7 ± 11.6        | 53.4 ± 8.5        | 49.8 ± 8.2                      |
|                                  | Black                          | 49.6 ± 10.8       | 54.4 ± 12.6        | 51.5 ± 13.3       | 48.9 ± 11.5       | 51.1 ± 14.8        | 51.7 ± 13.1        | 49.9 ± 21.5        | 51.3 ± 16.3       | 49.9 ± 20.6        | 52.5 ± 15          | 54.1 ± 20.2        | 51 ± 16.6         | 51.1 ± 14.4                     |
|                                  | Hispanic                       | 51.9 ± 11.7       | 53 ± 12.3          | 50.4 ± 12         | 52.3 ± 15.1       | 49.9 ± 14.9        | 50.1 ± 17.4        | 53.7 ± 17.5        | 54.2 ± 18.6       | 49.8 ± 20.5        | 54.8 ± 20.9        | 51.9 ± 18.5        | 60.1 ± 20.8       | 52.1 ± 15.6                     |
|                                  | Other                          | 54.7 ± 7          | 61.1 ± 12.3        | 50.5 ± 8.7        | 54.6 ± 7.6        | 43.6 ± 7.9         | 56.6 ± 10          | 51.5 ± 11.6        | 56 ± 9.3          | 51.2 ± 15.5        | 56.1 ± 6.1         | 49.6 ± 10.8        | 49.9 ± 15.7       | 54.2 ± 10.1                     |

**eTable 8. US consumption levels for key dietary factors in 1999-2002 by population subgroups (continued)**

| Dietary Factor <sup>a</sup>    | Population Strata <sup>b</sup> | Age                |                      |                    |                      |                    |                      |                    |                      |                    |                      |                    |                      |                                      |
|--------------------------------|--------------------------------|--------------------|----------------------|--------------------|----------------------|--------------------|----------------------|--------------------|----------------------|--------------------|----------------------|--------------------|----------------------|--------------------------------------|
|                                |                                | 25-34 y            |                      | 35-44 y            |                      | 45-54 y            |                      | 55-64 y            |                      | 65-74 y            |                      | 75+ y              |                      | 25+ y                                |
|                                |                                | Males<br>mean ± SD | Females<br>mean ± SD | Both genders<br>mean ± SD            |
|                                | <b>Total</b>                   | 10.7 ± 2.7         | 10.7 ± 3.4           | 11 ± 3.1           | 10.8 ± 2.9           | 10.7 ± 2.9         | 11 ± 3.1             | 10.7 ± 3.4         | 10.7 ± 3.4           | 10.6 ± 4           | 10.4 ± 3.7           | 10.7 ± 4.4         | 10.1 ± 3.5           | 50.4 ± 10.1                          |
| <b>Seafood omega-3s (mg/d)</b> | <b>Overall by age</b>          | 95.3 ± 225         |                      | 124.2 ± 301.6      |                      | 117.3 ± 247.8      |                      | 137.5 ± 380.1      |                      | 117.4 ± 274.2      |                      | 115.9 ± 400.5      |                      | F: 109.7 ± 295.8<br>M: 125.1 ± 297.8 |
|                                | <b>Education</b>               |                    |                      |                    |                      |                    |                      |                    |                      |                    |                      |                    |                      |                                      |
|                                | <High-school                   | 165 ± 409.7        | 79.4 ± 186.7         | 151.2 ± 435.7      | 129.7 ± 459.1        | 90.2 ± 212.7       | 91.2 ± 226.7         | 151.7 ± 617.1      | 134.2 ± 500.2        | 98 ± 273.8         | 160.4 ± 412.5        | 96.4 ± 363.3       | 137 ± 537            | 119.5 ± 399.9                        |
|                                | High-school                    | 86.7 ± 133.6       | 81.1 ± 174.5         | 83.6 ± 139.2       | 101.1 ± 174.3        | 124.6 ± 250.2      | 78.1 ± 120.6         | 129.4 ± 261.2      | 112.6 ± 306.2        | 127 ± 282.2        | 97.3 ± 191.1         | 112 ± 436.2        | 107.6 ± 266.6        | 94.8 ± 199.3                         |
|                                | College                        | 87.8 ± 221.5       | 102.3 ± 276.7        | 139.7 ± 186.5      | 202.6 ± 503.5        | 234.5 ± 382.7      | 96.1 ± 170.8         | 188.7 ± 414.7      | 132.1 ± 268.5        | 124.3 ± 250.2      | 110.5 ± 233.5        | 92.5 ± 299.7       | 185.6 ± 410.5        | 144.4 ± 329.7                        |
|                                | <b>Race</b>                    |                    |                      |                    |                      |                    |                      |                    |                      |                    |                      |                    |                      |                                      |
|                                | White                          | 101.8 ± 199.4      | 81.8 ± 188.8         | 101.1 ± 159.6      | 111.1 ± 280.4        | 160.8 ± 281.5      | 81.1 ± 124.5         | 138.2 ± 303.3      | 119.4 ± 272.2        | 109.6 ± 208.5      | 114 ± 204.2          | 99.8 ± 368         | 113.5 ± 309.7        | 110.8 ± 243.4                        |
|                                | Black                          | 154.1 ± 261.7      | 103.7 ± 210.6        | 156.4 ± 426        | 198.4 ± 475.5        | 154.9 ± 309.1      | 140 ± 279.9          | 165.3 ± 408        | 160.3 ± 334.3        | 183 ± 633          | 129.8 ± 328.2        | 55.4 ± 239         | 218.8 ± 799.9        | 155.2 ± 391.5                        |
|                                | Hispanic                       | 96.1 ± 253         | 89.3 ± 212.2         | 108.7 ± 294        | 111.7 ± 303.1        | 62.1 ± 150         | 75.8 ± 272.9         | 91.3 ± 624         | 50.7 ± 218.9         | 68.1 ± 312.3       | 70 ± 252             | 146.9 ± 668.9      | 27 ± 57              | 86.9 ± 289.3                         |
|                                | Other                          | 36.8 ± 28.9        | 107.9 ± 363.4        | 229.4 ± 253.1      | 423.6 ± 716          | 299.8 ± 406.3      | 66.2 ± 73.6          | 603 ± 835.7        | 224.9 ± 557.5        | 361.4 ± 517        | 312.7 ± 440.8        | 296.7 ± 522.6      | 1118.3 ± 1674.8      | 222.7 ± 445.3                        |
| <b>Total</b>                   | 102.9 ± 224.1                  | 87.4 ± 217.7       | 114.4 ± 219.8        | 134.1 ± 369.4      | 152.3 ± 318.7        | 85.5 ± 158.9       | 153.8 ± 413.4        | 122 ± 346.4        | 117.2 ± 283.8        | 117.5 ± 265.1      | 102.3 ± 395.1        | 124.5 ± 391.7      | 117.1 ± 296.8        |                                      |
| <b>Sodium (mg/d)</b>           | <b>Overall by age</b>          | 3326 ± 931         |                      | 3344 ± 929         |                      | 3396 ± 973         |                      | 3447 ± 1047        |                      | 3543 ± 1091        |                      | 3485 ± 1151        |                      | F: 3413 ± 1018<br>M: 3386 ± 999      |
|                                | <b>Education</b>               |                    |                      |                    |                      |                    |                      |                    |                      |                    |                      |                    |                      |                                      |
|                                | <High-school                   | 3116 ± 1040        | 3051 ± 887           | 3244 ± 1098        | 3284 ± 1398          | 3116 ± 1270        | 3393 ± 1110          | 3399 ± 1571        | 3628 ± 1414          | 3491 ± 1413        | 3573 ± 1464          | 3463 ± 1441        | 3510 ± 1145          | 3322 ± 1274                          |
|                                | High-school                    | 3301 ± 823         | 3362 ± 951           | 3261 ± 904         | 3272 ± 756           | 3470 ± 834         | 3372 ± 1129          | 3501 ± 1127        | 3417 ± 824           | 3661 ± 1042        | 3518 ± 855           | 3572 ± 1171        | 3441 ± 1024          | 3365 ± 946                           |
|                                | College                        | 3416 ± 856         | 3540 ± 935           | 3482 ± 779         | 3562 ± 954           | 3382 ± 746         | 3457 ± 734           | 3379 ± 751         | 3358 ± 792           | 3404 ± 875         | 3594 ± 962           | 3456 ± 1050        | 3477 ± 1074          | 3449 ± 858                           |
|                                | <b>Race</b>                    |                    |                      |                    |                      |                    |                      |                    |                      |                    |                      |                    |                      |                                      |
|                                | White                          | 3277 ± 653         | 3383 ± 860           | 3353 ± 680         | 3380 ± 663           | 3427 ± 674         | 3414 ± 885           | 3446 ± 855         | 3476 ± 766           | 3502 ± 855         | 3554 ± 809           | 3531 ± 1124        | 3473 ± 988           | 3418 ± 810                           |
|                                | Black                          | 3361 ± 979         | 3353 ± 981           | 3311 ± 1231        | 3163 ± 1192          | 2960 ± 1121        | 3134 ± 1122          | 3364 ± 2037        | 3410 ± 1308          | 3775 ± 1961        | 3568 ± 1722          | 3466 ± 2124        | 3504 ± 1359          | 3296 ± 1302                          |
|                                | Hispanic                       | 3085 ± 1244        | 3288 ± 1093          | 3264 ± 1541        | 3217 ± 1245          | 3242 ± 1412        | 3271 ± 1177          | 3258 ± 1705        | 3292 ± 1644          | 3402 ± 2109        | 3267 ± 1828          | 3114 ± 1656        | 3280 ± 1344          | 3238 ± 1430                          |
|                                | Other                          | 3950 ± 1286        | 3391 ± 910           | 3304 ± 1152        | 4229 ± 2000          | 4651 ± 1460        | 3881 ± 989           | 3885 ± 1351        | 3608 ± 665           | 4694 ± 1624        | 4090 ± 1162          | 3736 ± 965         | 4283 ± 1587          | 3839 ± 1331                          |
| <b>Total</b>                   | 3291 ± 888                     | 3362 ± 955         | 3334 ± 915           | 3355 ± 943         | 3394 ± 884           | 3399 ± 1044        | 3438 ± 1127          | 3455 ± 968         | 3539 ± 1126          | 3546 ± 1058        | 3509 ± 1248          | 3469 ± 1075        | 3400 ± 1009          |                                      |

<sup>a</sup> Dietary factors with probable or convincing evidence, based on criteria for assessing causality,<sup>11,13,14,86</sup> for etiologic relationships with cardiometabolic outcomes including coronary heart disease (CHD), stroke, type 2 diabetes, body mass index (BMI), or systolic blood pressure (SBP).<sup>9,10</sup> National Health and Nutrition Examination Survey (NHANES) data were used to inform nationally representative estimates of exposure to dietary factors, accounting for complex survey design and sampling weights as appropriate;<sup>3</sup> analyses are representative of the US population aged ≥25y. Specifically, sodium, macronutrient and energy intake were obtained from the Food and Nutrient Database for Dietary Studies, and intakes for food groups of interest were obtained from the MyPyramid Equivalents Database (MPED), for the 2002 estimate.<sup>90</sup> Servings in MPED were converted to grams per day. We estimated the mean and standard deviation (SD) of dietary intakes for the entire population and relevant sub-groups (e.g., by age/sex/race) using data from the 1999-2000 and 2001-2002 cycles (n=8,104); data from a single 24-hour recall were used.<sup>88</sup> Means and SDs, correcting for within- versus between person variance were estimated the strata of interest.<sup>89</sup> Because the 1999-2002 cycles included one 24-hr recall per person, which accurately estimates stratum mean intake but not SD, we utilized the observed ratio of between-person to total variance for each dietary factor in 2009-2012 to correct SDs in 1999-2002 for within-person variation.<sup>89</sup> All factors were adjusted for energy using the residual method (2,000 kcal/d)<sup>89</sup> or as percent of energy (%E, macronutrients). Because distributions of many dietary factors are non-normal, a gamma distribution was utilized for each based on the mean and SD, which allows for both normal and highly skewed distributions. Optimal metrics and units for each dietary factor were defined to be consistent with definitions used in epidemiological studies that provided evidence on diet-disease relative risks.<sup>9</sup> Specifically, **fruits** were defined as: total fruits (g/d), excluding fruit juices and salted or pickled fruits; **vegetables**: total vegetables (g/d), including beans/legumes, and excluding salted, pickled, starchy vegetables (e.g., potatoes, corn) vegetables, or vegetable juices; **nuts/seeds**: total nuts and seeds (g/d); **whole grains**: total whole grain foods and grain-based products made with 100% whole grains or their flours (g/d); **red meats**: total red meats (g/d), excluding poultry, fish, eggs, and all processed meats; **processed meats**: total processed meat intake (g/d); **sugar-sweetened beverages (SSBs)**: total SSBs (servings [8 fluid ounces]/d) with ≥50 kcal per 8 oz (237 mL) serving, including carbonated soft drinks, fruit drinks, presweetened iced teas, sports drinks, energy drinks, and excluding 100% fruit and vegetable juices, non-caloric artificially-sweetened drinks, and alcoholic beverages (servings/d); **polyunsaturated fats (PUFA)**: total PUFA intake (%E/d); **saturated fats (SFA)**: total SFA intake (%E/d); **carbohydrates (carbs)**: total carbohydrate intake (%E/d); **seafood omega-3 fats**: total dietary eicosapentaenoic (EPA) + docosahexaenoic (DHA) (mg/d) intake, excluding supplements; **sodium**: total dietary sodium intake (mg/d).

<sup>b</sup> Population strata were assigned as follows: age (25-34, 35-44, 45-54, 55-64, 65-74, and ≥75 yrs), sex (male and female), education (<high-school: less than high school degree, high-school: high school degree/equivalent or some college, and College: ≥4-year college degree), and race/ethnicity (White: non-Hispanic White, Black: non-Hispanic Black, Hispanic: Mexican American/other Hispanic, and Other: other race/mixed race).

**eTable 9. US consumption levels (median and inter-quartile range) for key dietary factors in 2009-2012 by population subgroups.**

| Dietary Factor <sup>a</sup>   | Population Strata <sup>b</sup> | Age                 |                     |                      |                      |                      |                      |                     |                      |                      |                      |                      |                      |                                                |  |
|-------------------------------|--------------------------------|---------------------|---------------------|----------------------|----------------------|----------------------|----------------------|---------------------|----------------------|----------------------|----------------------|----------------------|----------------------|------------------------------------------------|--|
|                               |                                | 25-34 y             |                     | 35-44 y              |                      | 45-54 y              |                      | 55-64 y             |                      | 65-74 y              |                      | 75+ y                |                      | 25+ y                                          |  |
|                               |                                | Males               | Females             | Males                | Females              | Males                | Females              | Males               | Females              | Males                | Females              | Males                | Females              | Both genders                                   |  |
|                               |                                | Median (IQR)        | Median (IQR)        | Median (IQR)         | Median (IQR)         | Median (IQR)         | Median (IQR)         | Median (IQR)        | Median (IQR)         | Median (IQR)         | Median (IQR)         | Median (IQR)         | Median (IQR)         | Median (IQR)                                   |  |
| <b>Fruits (g/d)</b>           | <b>Overall by age</b>          | 48.6 (0, 153.5)     |                     | 52 (0, 141.4)        |                      | 70.4 (2.1, 172.6)    |                      | 88.2 (14.2, 205)    |                      | 112.1 (27.1, 201)    |                      | 113.2 (38.7, 201)    |                      | F: 81.6 (7.6, 185.7)<br>M: 61.4 (0, 164.6)     |  |
|                               | <b>Education</b>               |                     |                     |                      |                      |                      |                      |                     |                      |                      |                      |                      |                      |                                                |  |
|                               | <High-school                   | 59 (0, 158.6)       | 7.4 (0, 99.3)       | 0 (0, 84.7)          | 52.9 (0, 139.3)      | 9.8 (0, 122.9)       | 59.7 (0, 133.3)      | 57.7 (0, 142.7)     | 84.5 (0, 153.4)      | 52.6 (0, 129.6)      | 76.5 (4.3, 181.7)    | 63.5 (0, 136.1)      | 92.6 (12.2, 154)     | 52.9 (0, 147)                                  |  |
|                               | High-school                    | 16.6 (0, 119.7)     | 33.9 (0, 123.2)     | 10.2 (0, 97.9)       | 29.2 (0, 139.3)      | 30.6 (0, 148.4)      | 70 (5.1, 172)        | 58.7 (4.3, 145.5)   | 82 (9.6, 197.2)      | 70.4 (4.9, 166.8)    | 118.8 (53.8, 199.2)  | 122.2 (42.8, 195.2)  | 140.1 (66.1, 210.7)  | 61 (0, 157.8)                                  |  |
|                               | College                        | 54 (0, 155.6)       | 107.8 (31.8, 195.8) | 94.3 (30.7, 175.6)   | 87.9 (14.4, 197)     | 121.6 (15.5, 227.7)  | 96.3 (37.2, 195.9)   | 140 (39.3, 241.9)   | 161 (63.8, 245.9)    | 145 (71.2, 243.1)    | 162.3 (80.6, 306.4)  | 134 (37.3, 255.6)    | 113.1 (67.8, 225.8)  | 110.9 (28.9, 215.5)                            |  |
|                               | <b>Race</b>                    |                     |                     |                      |                      |                      |                      |                     |                      |                      |                      |                      |                      |                                                |  |
|                               | White                          | 30 (0, 147.7)       | 54.2 (0, 183.8)     | 45.4 (0, 117.3)      | 55.3 (1.4, 154.6)    | 62.9 (0, 176.1)      | 72.4 (24.2, 167.8)   | 72.4 (9, 191)       | 110.5 (20.9, 215.5)  | 104.9 (14.5, 204.9)  | 120.6 (55.4, 214.9)  | 113.2 (34.8, 212.9)  | 123.6 (50.7, 199.5)  | 74.4 (5.4, 178.3)                              |  |
|                               | Black                          | 0 (0, 57)           | 9.8 (0, 122.2)      | 0 (0, 87.9)          | 14.1 (0, 104.1)      | 22.1 (0, 154.8)      | 61 (0, 179.9)        | 48.5 (0, 169.8)     | 77.3 (2.7, 174.1)    | 75.3 (0, 135)        | 77.4 (17, 158.1)     | 29.4 (0, 122.5)      | 105.2 (32, 175.8)    | 35.4 (0, 139.4)                                |  |
|                               | Hispanic                       | 68.2 (0, 171.9)     | 62.5 (0, 158.8)     | 33.4 (0, 131.9)      | 75.1 (8.4, 180.6)    | 78.8 (0, 191.4)      | 73.2 (3.7, 165.6)    | 76.8 (6.4, 151.6)   | 109.9 (45.5, 175)    | 65.2 (0, 160.1)      | 135.4 (51.4, 220)    | 85.2 (0, 174.2)      | 90.8 (29.2, 199.7)   | 71.5 (0, 166)                                  |  |
|                               | Other                          | 37.2 (0, 109.7)     | 83.4 (21.3, 220.3)  | 58.3 (11.6, 194.3)   | 110.5 (66.2, 220.9)  | 91.5 (0, 189.1)      | 114.1 (44.1, 219.4)  | 82.4 (57.9, 174.4)  | 116.4 (80.6, 269.9)  | 107 (15.3, 242.6)    | 103.8 (7.2, 171.3)   | 67.4 (5.1, 126.4)    | 234.4 (121.3, 308.4) | 88.8 (13.1, 206.4)                             |  |
| <b>Total</b>                  | 28.8 (0, 144.9)                | 55.2 (0, 168)       | 38.6 (0, 124)       | 61.5 (0.8, 156.9)    | 63.4 (0, 176.1)      | 74.4 (12.7, 172)     | 72.4 (9, 184.2)      | 104.1 (20.7, 215.5) | 102.2 (8.7, 196.1)   | 119.4 (46.8, 203.1)  | 101.1 (23.7, 201)    | 121.3 (50.7, 201.7)  | 71.2 (3.5, 174.9)    |                                                |  |
| <b>Vegetables (g/d)</b>       | <b>Overall by age</b>          | 144 (72.2, 231.2)   |                     | 148.2 (81.2, 232.9)  |                      | 157.9 (91.5, 252.5)  |                      | 161.8 (87.4, 262)   |                      | 165.8 (94.5, 269.5)  |                      | 143.8 (79.3, 235.2)  |                      | F: 160.6 (87.4, 253)<br>M: 144.9 (80.7, 231.6) |  |
|                               | <b>Education</b>               |                     |                     |                      |                      |                      |                      |                     |                      |                      |                      |                      |                      |                                                |  |
|                               | <High-school                   | 115.2 (47.2, 178.7) | 125.1 (65.7, 219.6) | 161.4 (88.7, 234.6)  | 123.7 (61, 201.5)    | 146.4 (72.5, 196.8)  | 143.1 (81.1, 212.8)  | 117.4 (52.2, 197.8) | 133.6 (71.5, 242.5)  | 116.7 (60, 184)      | 157.3 (89.1, 210.3)  | 132.3 (60.8, 257.4)  | 132 (75, 200.4)      | 134.4 (71.7, 215.2)                            |  |
|                               | High-school                    | 133.8 (66.8, 199.4) | 127.5 (63.5, 197.6) | 122.7 (59.8, 193.3)  | 143.7 (73.4, 232.9)  | 134 (59.1, 205.2)    | 153.2 (88.3, 239)    | 138.1 (66.8, 212.1) | 157.7 (78.8, 269.1)  | 149.8 (68.5, 245.2)  | 177.1 (97.2, 266.8)  | 131 (79.8, 233.1)    | 152.8 (83, 243.9)    | 141.9 (72.2, 226.4)                            |  |
|                               | College                        | 190 (111.4, 269.6)  | 173.2 (93.1, 257.6) | 186.6 (116.4, 265.5) | 155.8 (88.8, 251)    | 171.2 (116.1, 304)   | 216 (146.7, 342.4)   | 178.3 (112.1, 266)  | 203.9 (151.4, 314.1) | 187.6 (122.3, 272.4) | 200.3 (119.6, 330.1) | 142.9 (87.1, 235.5)  | 149.8 (79.2, 244.3)  | 184.8 (115.4, 285.9)                           |  |
|                               | <b>Race</b>                    |                     |                     |                      |                      |                      |                      |                     |                      |                      |                      |                      |                      |                                                |  |
|                               | White                          | 141.1 (77.5, 235.9) | 140.1 (74.3, 228.6) | 136.4 (81.2, 215)    | 152 (77.8, 238.8)    | 144.3 (78.1, 215.8)  | 172.1 (113.8, 288)   | 144.9 (84, 218.4)   | 182.1 (98.1, 284.8)  | 155 (85.2, 269.5)    | 174.9 (101.8, 275.5) | 132.3 (80.7, 239.8)  | 146.6 (79, 222.5)    | 152.7 (84.2, 242.4)                            |  |
|                               | Black                          | 75.4 (35.4, 154.6)  | 110.4 (59.9, 177.4) | 103.7 (50.2, 199.9)  | 101.3 (40.2, 177.8)  | 118.1 (48.7, 209.1)  | 121.5 (57.3, 231.5)  | 112.3 (46.8, 184.5) | 135.8 (79.2, 240.2)  | 120.8 (50.1, 216.7)  | 180.8 (94.3, 262.6)  | 127 (71.7, 208.4)    | 124 (72.6, 214.5)    | 116.4 (54.3, 198.2)                            |  |
|                               | Hispanic                       | 161.4 (96.2, 258.3) | 158.1 (79.1, 248.8) | 176.2 (115.7, 255.6) | 161 (102.9, 237.2)   | 171.2 (104.9, 229.7) | 163.9 (114.3, 240.4) | 183.4 (102.6, 285)  | 174.4 (88.4, 306.8)  | 170.9 (103.7, 253.3) | 187.1 (117.9, 275.3) | 141.5 (82.8, 258.9)  | 173.7 (108, 298.3)   | 167.9 (100.7, 255.6)                           |  |
|                               | Other                          | 152 (103, 236.4)    | 167.6 (89.4, 315.5) | 210 (122.2, 328.2)   | 198.6 (106.7, 336.5) | 172.9 (129, 318.4)   | 195 (99.8, 341.5)    | 196.5 (41.3, 316.5) | 244.3 (125.5, 374.6) | 153.9 (132, 241.2)   | 184.2 (151.6, 319.8) | 150.3 (117.2, 313.3) | 198.5 (148, 324.6)   | 187.2 (117.2, 319.8)                           |  |
| <b>Total</b>                  | 142.9 (72.2, 229.1)            | 145.7 (72.5, 231.2) | 148.2 (85.2, 229)   | 148.8 (76.2, 237.2)  | 146.1 (80.3, 219.1)  | 170.8 (98.5, 274.9)  | 144.9 (78.4, 224.7)  | 180.6 (98.1, 286.2) | 153.9 (85.2, 257.4)  | 178 (101.8, 275.5)   | 136.3 (80.7, 242.8)  | 147.9 (79.2, 231.7)  | 154 (83.6, 243.2)    |                                                |  |
| <b>Nuts &amp; seeds (g/d)</b> | <b>Overall by age</b>          | 0 (0, 7)            |                     | 0.8 (0, 10.2)        |                      | 2.1 (0, 13.5)        |                      | 2.6 (0, 18.1)       |                      | 2.8 (0, 15.5)        |                      | 1.7 (0, 11.9)        |                      | F: 2 (0, 12.8)<br>M: 1 (0, 12.4)               |  |
|                               | <b>Education</b>               |                     |                     |                      |                      |                      |                      |                     |                      |                      |                      |                      |                      |                                                |  |
|                               | <High-school                   | 0 (0, 0)            | 0 (0, 0.3)          | 0 (0, 2.6)           | 0 (0, 5.6)           | 0 (0, 2.1)           | 0 (0, 6.6)           | 0 (0, 7.5)          | 0 (0, 5.5)           | 0 (0, 3)             | 0 (0, 7.2)           | 0 (0, 3.5)           | 0 (0, 5.7)           | 0 (0, 3.9)                                     |  |
|                               | High-school                    | 0 (0, 3.9)          | 0 (0, 5)            | 0 (0, 9.5)           | 0 (0, 7.3)           | 1.3 (0, 9.2)         | 2.5 (0, 12.4)        | 0.8 (0, 12.3)       | 3.3 (0, 18.8)        | 1.4 (0, 9.1)         | 5.7 (0, 15.3)        | 1.9 (0, 10.6)        | 2.7 (0, 13.8)        | 1 (0, 10.2)                                    |  |
|                               | College                        | 5 (0, 27.7)         | 2.1 (0, 14.6)       | 4.8 (0, 19)          | 5.4 (0, 18.2)        | 6 (0, 20.8)          | 6.1 (0, 23.4)        | 5.9 (0, 29.5)       | 7.3 (0, 24.3)        | 6.4 (0, 35.1)        | 5.2 (0, 17.9)        | 4.5 (0, 24.7)        | 9.1 (0.7, 25.8)      | 5 (0, 21.4)                                    |  |
|                               | <b>Race</b>                    |                     |                     |                      |                      |                      |                      |                     |                      |                      |                      |                      |                      |                                                |  |
|                               | White                          | 1.4 (0, 15.5)       | 1.5 (0, 8.1)        | 3 (0, 16.1)          | 2.2 (0, 11.3)        | 3.2 (0, 15.7)        | 4.6 (0, 18.5)        | 2.6 (0, 19.5)       | 5.2 (0, 20)          | 2.4 (0, 17.4)        | 5.3 (0, 16.1)        | 1.8 (0, 13.8)        | 2.7 (0, 13.7)        | 2.9 (0, 15.9)                                  |  |
|                               | Black                          | 0 (0, 1.2)          | 0 (0, 1.5)          | 0 (0, 1.7)           | 0 (0, 8.5)           | 0 (0, 4.7)           | 0 (0, 10.1)          | 1.2 (0, 11.6)       | 2 (0, 13.7)          | 0 (0, 4.7)           | 0.2 (0, 8.7)         | 0 (0, 3.7)           | 0 (0, 4.2)           | 0 (0, 6.3)                                     |  |
|                               | Hispanic                       | 0 (0, 3.3)          | 0 (0, 2.9)          | 0 (0, 3.2)           | 0 (0, 5.7)           | 0 (0, 2)             | 0 (0, 4.8)           | 0 (0, 3.4)          | 0 (0, 4)             | 0 (0, 4.6)           | 0 (0, 6.2)           | 0 (0, 1.6)           | 0 (0, 5.7)           | 0 (0, 3.5)                                     |  |
|                               | Other                          | 0 (0, 7.3)          | 0.9 (0, 10.7)       | 1.4 (0, 8.4)         | 2.1 (0, 8.9)         | 0 (0, 6.7)           | 3.7 (0, 22.7)        | 0 (0, 9.6)          | 2.9 (0, 14.6)        | 4.5 (0, 11)          | 0.4 (0, 20.6)        | 0.4 (0, 13.1)        | 0 (0, 0)             | 0.8 (0, 10.5)                                  |  |
| <b>Total</b>                  | 0 (0, 7.8)                     | 0 (0, 6)            | 0.5 (0, 11.7)       | 1.1 (0, 9.8)         | 1.2 (0, 11.5)        | 2.9 (0, 14.8)        | 1.8 (0, 17.4)        | 3.5 (0, 18.6)       | 1.9 (0, 15.5)        | 3.6 (0, 15.3)        | 1.1 (0, 11)          | 2.1 (0, 12.2)        | 1.5 (0, 12.6)        |                                                |  |
| <b>Whole grains (g/d)</b>     | <b>Overall by age</b>          | 9 (0, 27.7)         |                     | 9.4 (0, 29)          |                      | 10.9 (0, 30.5)       |                      | 14.8 (2.3, 36.3)    |                      | 15.4 (2.6, 33.7)     |                      | 21.4 (4.9, 41.8)     |                      | F: 13.8 (0.9, 32.5)<br>M: 10.8 (0, 31.6)       |  |
|                               | <b>Education</b>               |                     |                     |                      |                      |                      |                      |                     |                      |                      |                      |                      |                      |                                                |  |

**eTable 9. US consumption levels (median and inter-quartile range) for key dietary factors in 2009-2012 by population subgroups (continued)**

| Dietary Factor <sup>a</sup>         | Population Strata <sup>b</sup> | Age               |                  |                    |                  |                   |                  |                    |                  |                  |                  |                   |                  | Both genders                           |
|-------------------------------------|--------------------------------|-------------------|------------------|--------------------|------------------|-------------------|------------------|--------------------|------------------|------------------|------------------|-------------------|------------------|----------------------------------------|
|                                     |                                | 25-34 y           |                  | 35-44 y            |                  | 45-54 y           |                  | 55-64 y            |                  | 65-74 y          |                  | 75+ y             |                  |                                        |
|                                     |                                | Males             | Females          | Males              | Females          | Males             | Females          | Males              | Females          | Males            | Females          | Males             | Females          |                                        |
|                                     | Median (IQR)                   | Median (IQR)      | Median (IQR)     | Median (IQR)       | Median (IQR)     | Median (IQR)      | Median (IQR)     | Median (IQR)       | Median (IQR)     | Median (IQR)     | Median (IQR)     | Median (IQR)      | Median (IQR)     |                                        |
|                                     | <High-school                   | 0 (0, 14.1)       | 0.9 (0, 17.5)    | 0 (0, 10.9)        | 1.6 (0, 14.9)    | 4.6 (0, 22.4)     | 6.5 (0, 22.6)    | 0 (0, 16.7)        | 16.2 (2.7, 35.4) | 7.3 (0, 23.4)    | 14.7 (3.1, 28.3) | 11 (0, 33.7)      | 17.2 (4.6, 45.9) | 5.9 (0, 23.5)                          |
|                                     | High-school                    | 5.8 (0, 23.5)     | 7.1 (0, 25.7)    | 6.4 (0, 24.2)      | 10.4 (0, 26.2)   | 9.9 (0, 29.3)     | 10 (0, 26.3)     | 12.8 (0, 41.4)     | 13.8 (2.6, 30.1) | 15.7 (0, 41.5)   | 14.4 (4.6, 33.4) | 24.3 (2.9, 41.9)  | 24.8 (7.7, 41)   | 11 (0, 29.1)                           |
|                                     | College                        | 16.1 (3.4, 34.2)  | 23 (5.8, 38.6)   | 15 (1.6, 42.1)     | 21.1 (6.4, 46)   | 19.1 (3.6, 46.3)  | 15.8 (1.3, 38.6) | 22.7 (3.8, 47.3)   | 17.3 (4.3, 36.6) | 20.5 (5.9, 41.3) | 21.6 (4.2, 34.4) | 21.3 (7.1, 36.1)  | 30.4 (5.7, 56.3) | 19.2 (4.2, 41)                         |
|                                     | <b>Race</b>                    |                   |                  |                    |                  |                   |                  |                    |                  |                  |                  |                   |                  |                                        |
|                                     | White                          | 10.7 (0, 28.2)    | 16.6 (0.7, 34.7) | 9.6 (0, 29.1)      | 14.5 (2.7, 36.4) | 11.2 (0, 33.3)    | 13.1 (0.4, 30.6) | 14.3 (0, 41.7)     | 15.5 (4, 34.9)   | 17.4 (0.4, 39.5) | 16.1 (5, 33.7)   | 21.7 (4.7, 40.6)  | 24.8 (7.2, 43.7) | 14.7 (1.4, 34.8)                       |
|                                     | Black                          | 4.6 (0, 24.4)     | 6.1 (0, 20.7)    | 4.7 (0, 14.5)      | 4.2 (0, 19.9)    | 10.5 (0, 30.1)    | 7.1 (0, 22.5)    | 12.6 (0, 26.2)     | 9.4 (0, 27.6)    | 7.6 (0, 26.2)    | 8.5 (0, 22.8)    | 10.3 (0, 27.3)    | 21.2 (2.5, 43.9) | 6.8 (0, 24.4)                          |
|                                     | Hispanic                       | 2.5 (0, 21.4)     | 3 (0, 14)        | 2 (0, 16.5)        | 8.3 (0, 25)      | 7.5 (0, 30.2)     | 5.2 (0, 18.9)    | 10.6 (0, 32)       | 10.5 (3.5, 28.7) | 11.4 (0, 31.4)   | 12.5 (0.2, 29.9) | 12.8 (0, 23.6)    | 12.9 (4.6, 35.3) | 5.6 (0, 22.7)                          |
|                                     | Other                          | 6.1 (0, 21.3)     | 9.3 (0, 33.6)    | 9.6 (0, 29.5)      | 21.1 (9.8, 38)   | 9.3 (0, 31.4)     | 18.2 (2.5, 36.9) | 15.2 (0.3, 51.8)   | 30.1 (3.6, 48)   | 13.7 (0, 21.2)   | 19.6 (5.2, 41.1) | 7.9 (0, 43.1)     | 25.4 (0, 60.5)   | 13.2 (0.7, 36.9)                       |
|                                     | <b>Total</b>                   | 7.3 (0, 25.1)     | 10.8 (0, 31.1)   | 6.8 (0, 26.7)      | 12.2 (0, 33.1)   | 10.8 (0, 31.6)    | 11.5 (0, 27.8)   | 14 (0, 40.5)       | 15.4 (3.6, 34.7) | 15 (0, 36.1)     | 15.5 (4.2, 32.6) | 19.6 (0, 40.5)    | 23.4 (6.7, 43.7) | 12.4 (0, 32.1)                         |
| <b>Red meats, unprocessed (g/d)</b> | <b>Overall by age</b>          | 30.5 (0, 72.4)    |                  | 37.3 (0, 78.1)     |                  | 39.8 (0, 78.3)    |                  | 28.3 (0, 69)       |                  | 32.6 (0, 72.8)   |                  | 30.9 (0, 69.2)    |                  | F: 27 (0, 62.7)<br>M: 41.8 (2, 86.7)   |
|                                     | <b>Education</b>               |                   |                  |                    |                  |                   |                  |                    |                  |                  |                  |                   |                  |                                        |
|                                     | <High-school                   | 34.8 (6, 84.2)    | 28.7 (0, 64)     | 73.7 (24.9, 121.1) | 38.8 (0, 85.6)   | 65 (21.7, 111.9)  | 38.3 (0, 74.5)   | 53 (0, 90.5)       | 39.6 (0, 65.6)   | 36.8 (1.7, 82.4) | 18.6 (0, 61.1)   | 38.7 (0, 69.2)    | 25.8 (0, 53.4)   | 39.2 (0, 80.8)                         |
|                                     | High-school                    | 38.7 (0, 97.1)    | 34.6 (2.1, 64.6) | 48.9 (12, 90)      | 28.1 (0, 66.3)   | 50.4 (9.7, 102.6) | 43.7 (5.6, 74.4) | 48.7 (16.3, 82.1)  | 26.8 (0, 62.8)   | 39.4 (0, 77)     | 21.3 (0, 65.4)   | 41.3 (4.4, 93.5)  | 31.8 (0, 62.7)   | 38.4 (0, 76)                           |
|                                     | College                        | 28.8 (0, 74.8)    | 18.3 (0, 57.5)   | 36.4 (7.9, 79.4)   | 20.5 (0, 49.6)   | 36.4 (0, 78.3)    | 18.2 (0, 51.7)   | 23.9 (0, 68.2)     | 9.8 (0, 47.1)    | 45.1 (6.2, 88.7) | 23.1 (0, 66.9)   | 26.9 (0, 65.6)    | 7 (0, 71.7)      | 24.3 (0, 63.8)                         |
|                                     | <b>Race</b>                    |                   |                  |                    |                  |                   |                  |                    |                  |                  |                  |                   |                  |                                        |
|                                     | White                          | 31.9 (0, 89.2)    | 31.3 (0, 63.2)   | 46.1 (13.3, 87.5)  | 26.7 (0, 57.5)   | 48.1 (3.6, 92.4)  | 33.9 (0, 66.2)   | 35.1 (4.2, 76.2)   | 21.9 (0, 57.7)   | 41.8 (1.7, 83.2) | 21.4 (0, 65.7)   | 36.3 (0, 79.9)    | 27.8 (0, 62.1)   | 34.7 (0, 74.1)                         |
|                                     | Black                          | 35.9 (2, 74.5)    | 31.4 (0, 72)     | 55.3 (5.2, 94)     | 25.7 (0, 66.8)   | 26.6 (0, 50.4)    | 27.5 (0, 65.5)   | 40.9 (0, 72.1)     | 26.8 (0, 66.6)   | 33.8 (0, 73.7)   | 23.1 (0, 56.8)   | 19 (0, 68.6)      | 22.9 (0, 65.9)   | 30.8 (0, 69.8)                         |
|                                     | Hispanic                       | 43.7 (9.4, 97.6)  | 25.9 (0, 67.9)   | 54.1 (17.4, 100.1) | 34.6 (0, 69.6)   | 53.5 (4.1, 103)   | 32.3 (0, 69.7)   | 58.5 (15.1, 106.3) | 31.8 (0, 67.2)   | 29.4 (0, 81.4)   | 13.7 (0, 63.3)   | 36.2 (12.2, 60.3) | 16.8 (0, 60.1)   | 38.6 (0, 79.4)                         |
|                                     | Other                          | 33 (0, 100.9)     | 5.5 (0, 43.1)    | 41 (0, 94.6)       | 25.8 (0, 57.6)   | 46.9 (7.8, 106)   | 22.5 (0, 61.4)   | 58.6 (21, 74.5)    | 21.4 (1.7, 48.3) | 30.3 (0, 75.1)   | 5.9 (4, 54.5)    | 60.2 (8.5, 94.5)  | 34.4 (0, 62.1)   | 27.5 (0, 68.3)                         |
|                                     | <b>Total</b>                   | 35.9 (0, 89.4)    | 26.9 (0, 62.3)   | 46.9 (12.6, 90.6)  | 28 (0, 62)       | 45.7 (3.4, 92.1)  | 33.5 (0, 66.2)   | 39.7 (5.3, 79.2)   | 24.2 (0, 59.2)   | 39.8 (0, 80.9)   | 21.1 (0, 65.2)   | 36.3 (0, 77.7)    | 27.5 (0, 62.1)   | 34.4 (0, 74)                           |
| <b>Processed meats (g/d)</b>        | <b>Overall by age</b>          | 16.9 (0, 47.3)    |                  | 17 (0, 50.5)       |                  | 18.7 (0, 49.5)    |                  | 17.7 (0, 46.1)     |                  | 20.1 (0, 49.3)   |                  | 14.5 (0, 40.5)    |                  | F: 12.1 (0, 37.2)<br>M: 24.4 (0, 56.8) |
|                                     | <b>Education</b>               |                   |                  |                    |                  |                   |                  |                    |                  |                  |                  |                   |                  |                                        |
|                                     | <High-school                   | 14.9 (0, 49)      | 17.1 (0, 38.9)   | 14 (0, 45.2)       | 7.5 (0, 37.7)    | 14.5 (0, 66.2)    | 9.2 (0, 29.3)    | 23.3 (0, 60.8)     | 12 (0, 36.7)     | 28.4 (6.3, 56.8) | 9.3 (0, 35.9)    | 33.6 (0, 58.5)    | 13.6 (0, 44.4)   | 15.4 (0, 45.7)                         |
|                                     | High-school                    | 26.6 (0.8, 57.8)  | 16.7 (0, 40.3)   | 30.5 (3.2, 70.8)   | 15.6 (0, 45.4)   | 32.8 (4, 59.6)    | 16.8 (0, 37.6)   | 28.3 (1.6, 57.6)   | 17.5 (0, 38.7)   | 31.6 (0, 59.8)   | 18.6 (0, 43.1)   | 20 (0, 38.1)      | 8.7 (0, 34.8)    | 21.6 (0, 50.4)                         |
|                                     | College                        | 14.5 (0, 49.9)    | 11.3 (0, 36.9)   | 24.1 (0, 68.1)     | 4 (0, 33.1)      | 22.5 (0, 52.8)    | 4.6 (0, 32)      | 16.8 (0, 43.3)     | 5.3 (0, 27.4)    | 22.1 (2.6, 51.3) | 8.1 (0, 35.5)    | 18.1 (0, 43)      | 0 (0, 22)        | 11.5 (0, 41.9)                         |
|                                     | <b>Race</b>                    |                   |                  |                    |                  |                   |                  |                    |                  |                  |                  |                   |                  |                                        |
|                                     | White                          | 21.8 (0, 53.9)    | 17.2 (0, 38.9)   | 28 (1.6, 71)       | 7.8 (0, 40.4)    | 33.7 (6, 59.3)    | 15.2 (0, 35.6)   | 25 (0, 57.6)       | 12.4 (0, 38.7)   | 26.3 (4.1, 52.6) | 15.1 (0, 42.1)   | 22.2 (0, 47.9)    | 11.7 (0, 34.8)   | 20.1 (0, 49.3)                         |
|                                     | Black                          | 20.9 (0, 55.3)    | 15.8 (0, 47.1)   | 27.1 (3.9, 52.8)   | 16.6 (0, 42.3)   | 31.1 (6.4, 66.2)  | 16.1 (0, 39.1)   | 23.2 (0, 62.4)     | 23.4 (0, 47.6)   | 31.5 (4.8, 66.2) | 19.8 (7.4, 41.1) | 25.1 (0, 49.3)    | 18.1 (0, 53)     | 21.6 (0, 51.8)                         |
|                                     | Hispanic                       | 24.9 (0, 54.1)    | 5.1 (0, 33.1)    | 14 (0, 46.6)       | 8.6 (0, 29.4)    | 9.8 (0, 33.7)     | 5.5 (0, 32.7)    | 15.8 (0, 47.6)     | 0 (0, 18)        | 15.4 (0, 45.3)   | 0 (0, 20.9)      | 21.9 (0, 52.6)    | 0 (0, 23.6)      | 9.9 (0, 37.8)                          |
|                                     | Other                          | 13.5 (0, 58.5)    | 11.7 (0, 37.3)   | 19.7 (0, 49.5)     | 0 (0, 28.6)      | 1.1 (0, 21.9)     | 0 (0, 11)        | 0 (0, 43)          | 0 (0, 9.5)       | 10 (0, 62.1)     | 7.6 (0, 46.5)    | 0 (0, 21.8)       | 0 (0, 7)         | 2.7 (0, 35.7)                          |
|                                     | <b>Total</b>                   | 21.8 (0, 54.1)    | 15 (0, 37.8)     | 24.4 (0, 63.2)     | 8.8 (0, 37.6)    | 26.7 (1.1, 58.7)  | 12.6 (0, 34.1)   | 24.5 (0, 55.1)     | 9.3 (0, 36.7)    | 25.9 (2.3, 53)   | 14.8 (0, 40.6)   | 20.9 (0, 49.9)    | 9.4 (0, 34.8)    | 17.6 (0, 47.6)                         |
| <b>SSB (servings (8 oz)/d)</b>      | <b>Overall by age</b>          | 1.02 (0, 2.62)    |                  | 0.85 (0, 2.35)     |                  | 0.5 (0, 1.74)     |                  | 0 (0, 1.24)        |                  | 0 (0, 0.77)      |                  | 0 (0, 0.7)        |                  | F: 0 (0, 1.48)<br>M: 0.69 (0, 2.07)    |
|                                     | <b>Education</b>               |                   |                  |                    |                  |                   |                  |                    |                  |                  |                  |                   |                  |                                        |
|                                     | <High-school                   | 1.66 (0.79, 3.03) | 1.51 (0, 2.85)   | 2.25 (0.92, 2.91)  | 1.33 (0, 2.67)   | 1.24 (0, 2.43)    | 1.07 (0, 2.39)   | 0.73 (0, 1.89)     | 0 (0, 1.55)      | 0.33 (0, 1.42)   | 0 (0, 1.29)      | 0 (0, 1.24)       | 0 (0, 0.91)      | 0.97 (0, 2.3)                          |
|                                     | High-school                    | 2.07 (0.63, 3.63) | 1.02 (0, 2.8)    | 1.3 (0, 2.98)      | 0.84 (0, 2.57)   | 0.81 (0, 1.83)    | 0.46 (0, 1.93)   | 0.59 (0, 1.57)     | 0 (0, 1.34)      | 0 (0, 1.02)      | 0 (0, 0.61)      | 0 (0, 0.88)       | 0 (0, 0.59)      | 0.62 (0, 2.05)                         |
|                                     | College                        | 0.8 (0, 1.43)     | 0 (0, 0.96)      | 0.32 (0, 1.25)     | 0 (0, 1.17)      | 0 (0, 1.2)        | 0 (0, 0.69)      | 0 (0, 1.05)        | 0 (0, 0.33)      | 0 (0, 0.6)       | 0 (0, 0.06)      | 0 (0, 0.63)       | 0 (0, 0.31)      | 0 (0, 0.94)                            |
|                                     | <b>Race</b>                    |                   |                  |                    |                  |                   |                  |                    |                  |                  |                  |                   |                  |                                        |

**eTable 9. US consumption levels (median and inter-quartile range) for key dietary factors in 2009-2012 by population subgroups (continued)**

| Dietary Factor <sup>a</sup>      | Population Strata <sup>b</sup> | Age                      |                       |                       |                       |                       |                       |                       |                       |                       |                       |                       |                       | Both genders                                 |
|----------------------------------|--------------------------------|--------------------------|-----------------------|-----------------------|-----------------------|-----------------------|-----------------------|-----------------------|-----------------------|-----------------------|-----------------------|-----------------------|-----------------------|----------------------------------------------|
|                                  |                                | 25-34 y                  |                       | 35-44 y               |                       | 45-54 y               |                       | 55-64 y               |                       | 65-74 y               |                       | 75+ y                 |                       |                                              |
|                                  |                                | Males                    | Females               | Males                 | Females               | Males                 | Females               | Males                 | Females               | Males                 | Females               | Males                 | Females               |                                              |
|                                  |                                | Median (IQR)             | Median (IQR)          | Median (IQR)          | Median (IQR)          | Median (IQR)          | Median (IQR)          | Median (IQR)          | Median (IQR)          | Median (IQR)          | Median (IQR)          | Median (IQR)          | Median (IQR)          | Median (IQR)                                 |
|                                  | White                          | 1.3 (0, 3.3)             | 0.38 (0, 1.72)        | 0.84 (0, 2.63)        | 0.35 (0, 1.73)        | 0.59 (0, 1.7)         | 0 (0, 1.27)           | 0.39 (0, 1.34)        | 0 (0, 0.57)           | 0 (0, 0.76)           | 0 (0, 0.47)           | 0 (0, 0.72)           | 0 (0, 0.51)           | 0.02 (0, 1.48)                               |
|                                  | Black                          | 1.64 (0.7, 2.99)         | 1.6 (0.41, 2.57)      | 2.01 (0.42, 3.03)     | 1.51 (0, 2.95)        | 1.13 (0, 2.34)        | 1.17 (0, 2.41)        | 0.85 (0, 2.1)         | 0.81 (0, 2.03)        | 0.63 (0, 1.86)        | 0.67 (0, 1.81)        | 0.64 (0, 1.53)        | 1.1 (0, 2.02)         | 1.23 (0, 2.52)                               |
|                                  | Hispanic                       | 1.73 (0.81, 2.96)        | 1.22 (0, 2.15)        | 1.32 (0.42, 2.54)     | 0.79 (0, 1.85)        | 1.12 (0, 2.26)        | 0.74 (0, 1.82)        | 0.74 (0, 1.56)        | 0 (0, 1.28)           | 0.43 (0, 1.39)        | 0 (0, 0.8)            | 0.29 (0, 0.66)        | 0 (0, 0.74)           | 1.01 (0, 2.09)                               |
|                                  | Other                          | 0.76 (0, 2.21)           | 0.29 (0, 1.41)        | 1.04 (0, 2.49)        | 0 (0, 1.4)            | 0.19 (0, 1.23)        | 0 (0, 1.05)           | 0.55 (0, 2.52)        | 0 (0, 0.57)           | 0 (0, 0.92)           | 0.03 (0, 0.85)        | 0 (0, 0.6)            | 0 (0, 0.6)            | 0.28 (0, 1.3)                                |
|                                  | <b>Total</b>                   | <b>1.43 (0.39, 3.08)</b> | <b>0.72 (0, 2.06)</b> | <b>1 (0, 2.63)</b>    | <b>0.64 (0, 1.85)</b> | <b>0.66 (0, 1.89)</b> | <b>0.32 (0, 1.63)</b> | <b>0.46 (0, 1.53)</b> | <b>0 (0, 0.86)</b>    | <b>0 (0, 0.84)</b>    | <b>0 (0, 0.61)</b>    | <b>0 (0, 0.74)</b>    | <b>0 (0, 0.6)</b>     | <b>0.45 (0, 1.74)</b>                        |
| <b>Polyunsaturated fats (%E)</b> | <b>Overall by age</b>          | 7.1 (5.6, 8.7)           |                       | 7.3 (5.9, 9.1)        |                       | 7.6 (5.9, 9.3)        |                       | 7.7 (6.1, 9.5)        |                       | 7.4 (5.8, 9.4)        |                       | 7.6 (6, 9.4)          |                       | F: 7.5 (6, 9.4)<br>M: 7.3 (5.8, 9)           |
|                                  | <b>Education</b>               |                          |                       |                       |                       |                       |                       |                       |                       |                       |                       |                       |                       |                                              |
|                                  | <High-school                   | 6.5 (4.5, 8.1)           | 6.5 (5.2, 8.2)        | 6.8 (5.4, 8.1)        | 7 (5.8, 8.3)          | 7.3 (5.5, 9.2)        | 7.2 (5.5, 9.3)        | 7.2 (6, 9.2)          | 7.5 (6.1, 8.6)        | 7.8 (5.6, 9)          | 6.9 (5.7, 8.7)        | 7.7 (5.9, 9.3)        | 7.4 (6.3, 9.4)        | 7.1 (5.5, 8.7)                               |
|                                  | High-school                    | 7.2 (5.5, 8.6)           | 7.2 (5.6, 8.9)        | 7.1 (5.7, 9.1)        | 7.6 (6, 9.6)          | 7.2 (5.8, 8.8)        | 7.7 (6.1, 9.8)        | 7.3 (5.7, 9.3)        | 8 (6.4, 9.6)          | 7 (5.3, 8.9)          | 7.5 (5.9, 9.5)        | 7.4 (5.4, 9.2)        | 7.6 (6.1, 9.5)        | 7.4 (5.8, 9.3)                               |
|                                  | College                        | 7.4 (6.1, 9)             | 7 (5.9, 8.6)          | 7.6 (6.3, 9.2)        | 7.5 (6.2, 9.4)        | 7.8 (6.2, 9)          | 7.7 (6.2, 9.3)        | 7.8 (6.2, 9.1)        | 8.4 (6.2, 10.2)       | 8 (6.2, 9.6)          | 7.6 (5.6, 10.5)       | 7.4 (5.8, 9.1)        | 8.5 (6.4, 9.5)        | 7.7 (6.2, 9.3)                               |
|                                  | <b>Race</b>                    |                          |                       |                       |                       |                       |                       |                       |                       |                       |                       |                       |                       |                                              |
|                                  | White                          | 7.3 (5.6, 8.9)           | 6.7 (5.6, 8.5)        | 7.3 (5.8, 8.9)        | 7.4 (6.2, 9.4)        | 7.5 (6, 9.1)          | 7.7 (5.9, 9.6)        | 7.7 (5.9, 9.3)        | 8.2 (6.4, 9.9)        | 7.6 (6, 9.4)          | 7.5 (5.9, 9.8)        | 7.5 (5.7, 9.3)        | 7.8 (6.3, 9.5)        | 7.5 (6, 9.3)                                 |
|                                  | Black                          | 7.1 (5.6, 8.6)           | 7.9 (6.2, 9.5)        | 7.5 (6, 9.3)          | 7.5 (6.1, 10)         | 8.1 (6.2, 9.2)        | 7.9 (6.5, 10)         | 7.4 (6.6, 9.3)        | 7.9 (6.5, 10.2)       | 7.4 (5.5, 9.6)        | 8.2 (6.7, 9.8)        | 7.5 (6.1, 9.4)        | 7.6 (5.7, 9.3)        | 7.7 (6.2, 9.6)                               |
|                                  | Hispanic                       | 7 (5.5, 8)               | 7 (5.5, 8.3)          | 7 (5.6, 8.4)          | 7.3 (5.8, 8.8)        | 7 (5.6, 8.1)          | 7 (5.5, 8.7)          | 7 (5.4, 8.5)          | 6.7 (5.7, 8)          | 6.9 (5.4, 8.6)        | 6.7 (5.6, 7.6)        | 6.7 (5.1, 8)          | 6.9 (5.5, 8.1)        | 7 (5.6, 8.4)                                 |
|                                  | Other                          | 6.8 (5.3, 8.9)           | 7.8 (6.4, 9.1)        | 7.5 (5.7, 9.4)        | 7 (5.5, 8.7)          | 7.6 (5.7, 9)          | 8.4 (6.6, 10.1)       | 7.2 (4, 8)            | 8.3 (6.2, 11.2)       | 6.3 (5, 8.4)          | 5.8 (5.1, 7.6)        | 8.2 (5.7, 9.2)        | 7.6 (6, 8.2)          | 7.5 (5.8, 9.1)                               |
| <b>Total</b>                     | <b>7.2 (5.5, 8.6)</b>          | <b>7.2 (5.5, 8.6)</b>    | <b>7.2 (5.5, 8.6)</b> | <b>7.2 (5.5, 8.6)</b> | <b>7.2 (5.5, 8.6)</b> | <b>7.2 (5.5, 8.6)</b> | <b>7.2 (5.5, 8.6)</b> | <b>7.2 (5.5, 8.6)</b> | <b>7.2 (5.5, 8.6)</b> | <b>7.2 (5.5, 8.6)</b> | <b>7.2 (5.5, 8.6)</b> | <b>7.2 (5.5, 8.6)</b> | <b>7.2 (5.5, 8.6)</b> | <b>7.4 (5.9, 9.2)</b>                        |
| <b>Saturated fats (%E)</b>       | <b>Overall by age</b>          | 10.4 (8.3, 12.3)         |                       | 10.4 (8.5, 12.4)      |                       | 10.9 (8.8, 12.9)      |                       | 10.4 (8.4, 12.6)      |                       | 10.6 (8.6, 12.8)      |                       | 10.5 (8.6, 12.7)      |                       | F: 10.4 (8.5, 12.5)<br>M: 10.6 (8.6, 12.7)   |
|                                  | <b>Education</b>               |                          |                       |                       |                       |                       |                       |                       |                       |                       |                       |                       |                       |                                              |
|                                  | <High-school                   | 9 (7.6, 11.5)            | 10 (7.6, 12.3)        | 9.6 (8, 11.5)         | 9.4 (7.9, 10.8)       | 10.6 (8.8, 13.1)      | 10 (8.4, 12.2)        | 10.2 (8.3, 12.8)      | 10 (7.6, 12.4)        | 10.8 (8.7, 13.6)      | 9.8 (8.1, 11.9)       | 10.4 (8.2, 12)        | 9.7 (7.9, 11.9)       | 10.7 (8.7, 12.8)                             |
|                                  | High-school                    | 10.5 (8.7, 12.2)         | 10.8 (8.8, 12.7)      | 11 (8.7, 12.7)        | 10.1 (8.4, 12.2)      | 11.2 (9, 13.3)        | 11 (9.2, 13.3)        | 11.1 (8.8, 13)        | 9.9 (8.3, 12.6)       | 10.8 (8.9, 13)        | 10.7 (8.7, 12.7)      | 10.5 (8.5, 12.3)      | 10.8 (8.9, 12.8)      | 10.5 (8.5, 12.5)                             |
|                                  | College                        | 10.4 (8.2, 11.8)         | 10.1 (8.2, 12.4)      | 10.5 (8.6, 13.1)      | 10.5 (8.6, 12.7)      | 11 (8.9, 12.7)        | 10.6 (8.4, 12.8)      | 10.3 (8.6, 12.4)      | 10.1 (8.2, 12)        | 10 (8.4, 12.2)        | 11.5 (8.6, 13.4)      | 11.2 (9, 13.1)        | 10.8 (9.1, 12.3)      |                                              |
|                                  | <b>Race</b>                    |                          |                       |                       |                       |                       |                       |                       |                       |                       |                       |                       |                       |                                              |
|                                  | White                          | 10.5 (8.7, 12.5)         | 10.9 (8.8, 12.6)      | 11.2 (9.3, 13.1)      | 10.1 (8.5, 12.3)      | 11.7 (9.6, 13.3)      | 11 (9, 13.3)          | 11 (8.7, 13.1)        | 10 (8.4, 12.7)        | 10.7 (8.8, 13.1)      | 10.9 (8.8, 13)        | 10.7 (8.7, 13)        | 10.7 (9, 12.8)        | 10.8 (8.8, 12.9)                             |
|                                  | Black                          | 10.3 (8.1, 11.9)         | 10.4 (8, 12.3)        | 10.4 (7.7, 12.2)      | 10.4 (8.5, 12.2)      | 10.3 (8.5, 12.5)      | 10.1 (8.2, 12.2)      | 10.2 (8.5, 12.4)      | 10.3 (8.4, 12.3)      | 10.1 (8.6, 11.6)      | 10.3 (8.4, 12.3)      | 10.4 (9, 12.7)        | 8.9 (7.1, 11.3)       | 10.2 (8.2, 12.2)                             |
|                                  | Hispanic                       | 9.9 (7.9, 11.6)          | 9.6 (7.9, 12.1)       | 10 (8.3, 12.3)        | 10.2 (8.2, 12)        | 9.8 (7.8, 11.6)       | 10.1 (8.5, 11.9)      | 10.4 (8.1, 12.4)      | 9.1 (7.3, 11.8)       | 10.4 (8.1, 12.4)      | 9 (7.5, 11.2)         | 9.1 (7.7, 11.2)       | 9.5 (7.6, 11.1)       | 9.8 (8.1, 11.9)                              |
|                                  | Other                          | 9.2 (6.6, 11.3)          | 9.2 (7.2, 11.1)       | 8.3 (6.4, 11.1)       | 10 (8.2, 11.9)        | 8.9 (6, 10.8)         | 10.1 (7.7, 11.8)      | 8.9 (6.8, 10.7)       | 8.6 (7, 10.7)         | 8.5 (7.5, 12.6)       | 8.9 (6.5, 11.2)       | 8.8 (6.8, 11.1)       | 7.4 (6.9, 11.7)       | 9.2 (7.1, 11.3)                              |
| <b>Total</b>                     | <b>10.4 (8.3, 12)</b>          | <b>10.4 (8.3, 12)</b>    | <b>10.4 (8.3, 12)</b> | <b>10.4 (8.3, 12)</b> | <b>10.4 (8.3, 12)</b> | <b>10.4 (8.3, 12)</b> | <b>10.4 (8.3, 12)</b> | <b>10.4 (8.3, 12)</b> | <b>10.4 (8.3, 12)</b> | <b>10.4 (8.3, 12)</b> | <b>10.4 (8.3, 12)</b> | <b>10.4 (8.3, 12)</b> | <b>10.4 (8.3, 12)</b> | <b>10.5 (8.5, 12.6)</b>                      |
| <b>Carbohydrates (%E)</b>        | <b>Overall by age</b>          | 50.4 (44.1, 56.4)        |                       | 49.7 (43, 55.3)       |                       | 48.9 (42.7, 54.7)     |                       | 48.7 (43.1, 54.6)     |                       | 48.6 (43.2, 54.7)     |                       | 51.4 (46.1, 56.9)     |                       | F: 50.6 (44.9, 56.3)<br>M: 48.2 (42.1, 54.2) |
|                                  | <b>Education</b>               |                          |                       |                       |                       |                       |                       |                       |                       |                       |                       |                       |                       |                                              |
|                                  | <High-school                   | 53.5 (44.9, 60)          | 53.9 (45.8, 60.4)     | 48.9 (44.3, 56.4)     | 52.5 (45.8, 58.9)     | 50 (39.8, 54.7)       | 51.4 (45.9, 57.6)     | 48 (42.7, 54.6)       | 49.5 (45.5, 57.2)     | 46.1 (40.4, 52)       | 53 (44.8, 59.5)       | 49.9 (44.4, 56.3)     | 53.5 (48, 57.8)       | 51.2 (44.4, 57.5)                            |
|                                  | High-school                    | 49.7 (44.2, 55.3)        | 51.4 (46.6, 57)       | 47.2 (39.4, 53.1)     | 50.5 (44.2, 56.2)     | 47.5 (41.1, 53.8)     | 49.1 (43.6, 55.2)     | 46.8 (42.1, 54)       | 50.1 (44.1, 56.2)     | 47.3 (42.5, 52.9)     | 49.9 (44.7, 56.2)     | 50.2 (45.1, 57.1)     | 51.9 (47.2, 57.1)     | 49.3 (43.4, 55.3)                            |
|                                  | College                        | 46.3 (41.1, 52.5)        | 50.2 (44.5, 56.4)     | 47.8 (40.8, 54.1)     | 50.8 (47.2, 55.5)     | 48.5 (42.1, 54.2)     | 49.2 (44.5, 54.3)     | 49.1 (41.1, 54.1)     | 49.3 (43.9, 53.8)     | 46.8 (42.3, 52.9)     | 50.2 (42.7, 53.5)     | 50.1 (44.7, 55.1)     | 49.1 (46.5, 52.4)     | 49.2 (42.9, 54.3)                            |
|                                  | <b>Race</b>                    |                          |                       |                       |                       |                       |                       |                       |                       |                       |                       |                       |                       |                                              |
|                                  | White                          | 48.5 (42.5, 54.4)        | 50.7 (45.6, 57)       | 46.7 (39.5, 52.9)     | 50.4 (45.1, 55.9)     | 47.1 (40.7, 52.7)     | 49.2 (43.5, 55.2)     | 47 (41.3, 54)         | 49.3 (43.7, 54.6)     | 46.2 (41.7, 50.8)     | 49.9 (43.7, 55.5)     | 50 (44.7, 56)         | 51.3 (46.8, 56.7)     | 48.8 (42.7, 54.6)                            |
|                                  | Black                          | 48.3 (41.3, 54.8)        | 50.7 (44.7, 56.5)     | 48.2 (42.5, 53.7)     | 49.6 (43.2, 55.5)     | 48.1 (40.6, 54.3)     | 49.4 (45.2, 54.7)     | 48.1 (41.5, 52.8)     | 49.3 (43.8, 56.2)     | 48.6 (42.5, 55.1)     | 51.4 (44.5, 55.8)     | 48.7 (43.5, 54.7)     | 56.2 (48.5, 61.2)     | 49.5 (43.2, 55.3)                            |
|                                  | Hispanic                       | 51.1 (44.5, 56.6)        | 53.3 (46, 58.3)       | 49.6 (43.4, 54.1)     | 52.1 (47.1, 57.2)     | 51.3 (45.2, 56.1)     | 52 (46.6, 57.6)       | 49.9 (44.3, 55.1)     | 53.1 (48, 58.5)       | 49.9 (44.5, 57)       | 54.2 (47.3, 59)       | 53.7 (47.9, 61.5)     | 54.2 (48.8, 58.4)     | 51.6 (45.6, 57)                              |
|                                  | Other                          | 51.4 (47.5, 54.6)        | 52.5 (45.8, 60.6)     | 54 (47.4, 60.2)       | 54.7 (48.5, 61.7)     | 51.3 (45.8, 58.9)     | 49.9 (45.2, 57.4)     | 50.6 (44.3, 62.6)     | 53 (49.5, 58.4)       | 49.1 (44.1, 56.8)     | 59.5 (51.5, 66.5)     | 55.2 (49, 59.2)       | 53.8 (52.6, 60)       | 52.7 (46.1, 59.2)                            |

**eTable 9. US consumption levels (median and inter-quartile range) for key dietary factors in 2009-2012 by population subgroups (continued)**

| Dietary Factor <sup>a</sup>    | Population Strata <sup>b</sup> | Age                |                    |                    |                    |                    |                    |                    |                    |                     |                   |                    |                    | Both genders<br>Median (IQR)                 |
|--------------------------------|--------------------------------|--------------------|--------------------|--------------------|--------------------|--------------------|--------------------|--------------------|--------------------|---------------------|-------------------|--------------------|--------------------|----------------------------------------------|
|                                |                                | 25-34 y            |                    | 35-44 y            |                    | 45-54 y            |                    | 55-64 y            |                    | 65-74 y             |                   | 75+ y              |                    |                                              |
|                                |                                | Males              | Females            | Males              | Females            | Males              | Females            | Males              | Females            | Males               | Females           | Males              | Females            |                                              |
|                                |                                | Median (IQR)        | Median (IQR)      | Median (IQR)       | Median (IQR)       |                                              |
| <b>Total</b>                   |                                | 49.5 (42.9, 55)    | 49.5 (42.9, 55)    | 49.5 (42.9, 55)    | 49.5 (42.9, 55)    | 49.5 (42.9, 55)    | 49.5 (42.9, 55)    | 49.5 (42.9, 55)    | 49.5 (42.9, 55)    | 49.5 (42.9, 55)     | 49.5 (42.9, 55)   | 49.5 (42.9, 55)    | 49.5 (42.9, 55)    | 49.5 (43.4, 55.3)                            |
| <b>Seafood omega-3s (mg/d)</b> | <b>Overall by age</b>          | 37.3 (15.3, 76.3)  |                    | 37.1 (14.8, 82.2)  |                    | 37.6 (15.3, 95.1)  |                    | 39.4 (15.3, 95.3)  |                    | 40.5 (15.8, 113.9)  |                   | 34 (13.7, 83.9)    |                    | F: 36.1 (13.9, 86.5)<br>M: 39.2 (16.7, 92)   |
|                                | <b>Education</b>               |                    |                    |                    |                    |                    |                    |                    |                    |                     |                   |                    |                    |                                              |
|                                | <High-school                   | 35 (18.4, 76.2)    | 38.4 (12.9, 63.4)  | 45.5 (14, 94.1)    | 35.6 (14.4, 87.9)  | 39 (10.5, 77.9)    | 46.6 (18.6, 111.9) | 35.8 (14.1, 77.7)  | 27.7 (12.3, 74.9)  | 49.2 (18.8, 102.5)  | 35.7 (14.8, 88.5) | 44.5 (14.3, 104.7) | 29.1 (14.2, 69.1)  | 38 (14.2, 83.8)                              |
|                                | High-school                    | 35.3 (16.1, 63.3)  | 29.1 (14.1, 62.2)  | 38.1 (17.5, 81.3)  | 35.4 (12.8, 74.6)  | 35 (13.9, 73.3)    | 34.9 (13.9, 82)    | 41.1 (15.9, 84.8)  | 39.5 (15.8, 84.6)  | 36.8 (13.8, 104.6)  | 41.2 (15, 102.9)  | 34.3 (11.6, 81)    | 25.2 (12.1, 50.5)  | 35.1 (14.7, 77.6)                            |
|                                | College                        | 53.5 (23.1, 123.2) | 43.8 (13.2, 102.5) | 35 (18.7, 71.5)    | 35.2 (13.2, 83.9)  | 37.5 (17.4, 108)   | 43 (18, 147.5)     | 45.6 (16.8, 143.2) | 38.5 (10.9, 96.5)  | 42.4 (21.1, 201.8)  | 40.7 (18, 95.6)   | 46.6 (22.4, 98.3)  | 78.7 (22.8, 196.4) | 40.7 (16.9, 110.8)                           |
|                                | <b>Race</b>                    |                    |                    |                    |                    |                    |                    |                    |                    |                     |                   |                    |                    |                                              |
|                                | White                          | 35.5 (16.1, 69.8)  | 29.2 (12, 61.1)    | 32.2 (15.2, 67.4)  | 28.2 (12.4, 72.5)  | 33.9 (13, 68.6)    | 34.2 (14.3, 84.8)  | 42.3 (16.2, 104)   | 32 (12.2, 80.9)    | 36.8 (15.4, 124.8)  | 40.7 (15.5, 96.1) | 42.7 (15.2, 91.6)  | 27.2 (12.8, 73.2)  | 34.3 (13.9, 75.6)                            |
|                                | Black                          | 58.3 (24.7, 109.2) | 40.4 (15.6, 93.1)  | 56.1 (30.7, 105.4) | 42.2 (25.2, 122.7) | 50.6 (23.6, 111.4) | 64.8 (26.3, 135.4) | 60.3 (23.4, 133.5) | 48.7 (20.2, 107.7) | 56.3 (24.8, 118.2)  | 55.6 (18.9, 143)  | 46.9 (21.6, 115.3) | 30.5 (15.4, 97.2)  | 52.5 (23.1, 112.3)                           |
|                                | Hispanic                       | 38.4 (20.5, 81.9)  | 40.5 (15, 81)      | 49.5 (23.7, 100.2) | 41.5 (21.1, 83.9)  | 45.8 (19.9, 100.1) | 37.8 (19.2, 87.6)  | 38.9 (20, 74.8)    | 37.3 (14.9, 79.4)  | 44.8 (16, 83.8)     | 38.1 (17.9, 96.9) | 23.4 (6.4, 61.6)   | 39.2 (12.1, 71.6)  | 40.8 (18, 87.6)                              |
|                                | Other                          | 64.1 (18.4, 281.1) | 90.1 (30.1, 221.3) | 59.4 (23.1, 162.4) | 35.7 (5.9, 196.5)  | 48.4 (20.7, 176.4) | 76.4 (11.7, 191.7) | 57.4 (8.4, 107.5)  | 63.9 (25.7, 143.8) | 103.7 (41.2, 248.2) | 30.9 (11.5, 35.1) | 50.7 (9.7, 158.1)  | 79.2 (29.8, 179.7) | 59.9 (20.4, 194.3)                           |
|                                | <b>Total</b>                   | 38.6 (18.4, 81.9)  | 38.6 (18.4, 81.9)  | 38.6 (18.4, 81.9)  | 38.6 (18.4, 81.9)  | 38.6 (18.4, 81.9)  | 38.6 (18.4, 81.9)  | 38.6 (18.4, 81.9)  | 38.6 (18.4, 81.9)  | 38.6 (18.4, 81.9)   | 38.6 (18.4, 81.9) | 38.6 (18.4, 81.9)  | 38.6 (18.4, 81.9)  | 37.9 (15.1, 88.5)                            |
| <b>Sodium (mg/d)</b>           | <b>Overall by age</b>          | 3325 (2832, 3864)  |                    | 3355 (2879, 3917)  |                    | 3362 (2907, 3917)  |                    | 3314 (2873, 3877)  |                    | 3458 (2926, 4134)   |                   | 3409 (2838, 4072)  |                    | F: 3377 (2899, 3990)<br>M: 3337 (2861, 3877) |
|                                | <b>Education</b>               |                    |                    |                    |                    |                    |                    |                    |                    |                     |                   |                    |                    |                                              |
|                                | <High-school                   | 2965 (2413, 3658)  | 3261 (2754, 4095)  | 3188 (2499, 3750)  | 3312 (2818, 3689)  | 3247 (2887, 3758)  | 3310 (2789, 3901)  | 3396 (2867, 3860)  | 3361 (2699, 4168)  | 3616 (2801, 4340)   | 3540 (2854, 4420) | 3879 (3230, 4571)  | 3503 (3008, 4236)  | 3340 (2794, 4014)                            |
|                                | High-school                    | 3321 (2833, 3783)  | 3221 (2788, 3795)  | 3363 (2865, 3858)  | 3360 (2918, 3997)  | 3354 (2848, 3913)  | 3385 (2926, 3956)  | 3258 (2915, 3708)  | 3434 (2930, 4116)  | 3473 (3003, 4036)   | 3483 (2963, 4151) | 3301 (2823, 3806)  | 3309 (2867, 3933)  | 3356 (2887, 3917)                            |
|                                | College                        | 3392 (2946, 4033)  | 3494 (3005, 4071)  | 3533 (2899, 4147)  | 3398 (2985, 3917)  | 3449 (3018, 3966)  | 3342 (2949, 3875)  | 3036 (2810, 3754)  | 3297 (2948, 3718)  | 3340 (2930, 3839)   | 3360 (2881, 3954) | 3188 (2616, 3749)  | 3394 (2879, 4282)  | 3369 (2913, 3924)                            |
|                                | <b>Race</b>                    |                    |                    |                    |                    |                    |                    |                    |                    |                     |                   |                    |                    |                                              |
|                                | White                          | 3243 (2862, 3747)  | 3379 (2860, 3837)  | 3369 (2824, 3874)  | 3345 (2997, 3925)  | 3354 (2923, 3866)  | 3319 (2842, 3875)  | 3223 (2834, 3708)  | 3342 (2913, 3956)  | 3406 (2927, 3914)   | 3435 (2896, 4156) | 3380 (2775, 4040)  | 3347 (2858, 4010)  | 3343 (2875, 3890)                            |
|                                | Black                          | 3200 (2564, 3682)  | 3143 (2788, 3643)  | 3193 (2775, 3648)  | 3387 (2864, 3841)  | 3235 (2772, 3754)  | 3323 (2941, 3901)  | 3261 (2804, 3779)  | 3398 (2779, 3907)  | 3635 (3124, 4207)   | 3538 (2958, 4271) | 3611 (3244, 4173)  | 3442 (2979, 4202)  | 3291 (2850, 3858)                            |
|                                | Hispanic                       | 3255 (2625, 3875)  | 3344 (2829, 3894)  | 3290 (2864, 3750)  | 3114 (2723, 3657)  | 3341 (2871, 3951)  | 3442 (2930, 3868)  | 3334 (2779, 3971)  | 3309 (2845, 3990)  | 3414 (3036, 4114)   | 3617 (2938, 4180) | 3546 (2967, 4102)  | 3747 (3122, 4343)  | 3316 (2803, 3876)                            |
|                                | Other                          | 4106 (3485, 4699)  | 3736 (3130, 5162)  | 3679 (3084, 4866)  | 3698 (3306, 4318)  | 3721 (3186, 4229)  | 3598 (3058, 4452)  | 3404 (3190, 4636)  | 4227 (3391, 4790)  | 4515 (3346, 4969)   | 3801 (3200, 4582) | 3507 (3228, 4353)  | 3496 (3248, 4795)  | 3769 (3190, 4700)                            |
|                                | <b>Total</b>                   | 3288 (2824, 3812)  | 3288 (2824, 3812)  | 3288 (2824, 3812)  | 3288 (2824, 3812)  | 3288 (2824, 3812)  | 3288 (2824, 3812)  | 3288 (2824, 3812)  | 3288 (2824, 3812)  | 3288 (2824, 3812)   | 3288 (2824, 3812) | 3288 (2824, 3812)  | 3288 (2824, 3812)  | 3355 (2873, 3933)                            |

<sup>a</sup> Dietary factors with probable or convincing evidence, based on criteria for assessing causality,<sup>11,13,14,86</sup> for etiologic relationships with cardiometabolic outcomes including coronary heart disease (CHD), stroke, type 2 diabetes, body mass index (BMI), or systolic blood pressure (SBP).<sup>9,10,11</sup> National Health and Nutrition Examination Survey (NHANES) data were used to inform nationally representative estimates of exposure to dietary factors, accounting for complex survey design and sampling weights as appropriate;<sup>3</sup> analyses are representative of the US population aged ≥25y. Specifically, sodium, macronutrient and energy intake were obtained from the Food and Nutrient Database for Dietary Studies, and intakes for food groups of interest were obtained from the Food Patterns Equivalents Database (FPED) for the 2012 estimate.<sup>87</sup> Servings in FPED were converted to grams per day. We estimated the mean and inter-quartile range (IQR) of dietary intakes for the entire population and relevant sub-groups (e.g., by age/sex/race) using data from the 2009-2010 and 2011-2012 cycles (n=8,516); data from two recalls were used. All factors were adjusted for energy using the residual method (2,000 kcal/d)<sup>89</sup> or as percent of energy (%E, macronutrients). Optimal metrics and units for each dietary factor were defined to be consistent with definitions used in epidemiological studies that provided evidence on diet-disease relative risks.<sup>9</sup> Specifically, **fruits** were defined as: total fruits (g/d), excluding fruit juices and salted or pickled fruits; **vegetables**: total vegetables (g/d), including beans/legumes, and excluding salted, pickled, starchy vegetables (e.g., potatoes, corn) vegetables, or vegetable juices; **nuts/seeds**: total nuts and seeds (g/d); **whole grains**: total whole grain foods and grain-based products made with 100% whole grains or their flours (g/d); **red meats**: total red meats (g/d), excluding poultry, fish, eggs, and all processed meats; **processed meats**: total processed meat intake (g/d); **sugar-sweetened beverages (SSBs)**: total SSBs (servings [8 fluid ounces]/d) with ≥50 kcal per 8 oz (237 mL) serving, including carbonated soft drinks, fruit drinks, presweetened iced teas, sports drinks, energy drinks, and excluding 100% fruit and vegetable juices, non-caloric artificially-sweetened drinks, and alcoholic beverages (servings/d); **polyunsaturated fats (PUFA)**: total PUFA intake (%E/d); **saturated fats (SFA)**: total SFA intake (%E/d); **carbohydrates (carbs)**: total carbohydrate intake (%E/d); **seafood omega-3 fats**: total dietary eicosapentaenoic (EPA) + docosahexaenoic (DHA) (mg/d) intake, excluding supplements; **sodium**: total dietary sodium intake (mg/d).

<sup>b</sup> Population strata were assigned as follows: age (25-34, 35-44, 45-54, 55-64, 65-74, and ≥75 yrs), sex (male and female), education (<high-school: less than high school degree, high-school: high school degree/equivalent or some college, and College: ≥4-year college degree), and race/ethnicity (White: non-Hispanic White, Black: non-Hispanic Black, Hispanic: Mexican American/other Hispanic, and Other: other race/mixed race).

**eTable 10. US consumption levels (median and inter-quartile range) for key dietary factors in 1999-2002 by population subgroups.**

| Dietary Factor <sup>a</sup>   | Population Strata <sup>b</sup> | Age                 |                     |                     |                      |                      |                     |                     |                      |                      |                      |                      |                     | 25+ y                                        |              |
|-------------------------------|--------------------------------|---------------------|---------------------|---------------------|----------------------|----------------------|---------------------|---------------------|----------------------|----------------------|----------------------|----------------------|---------------------|----------------------------------------------|--------------|
|                               |                                | 25-34 y             |                     | 35-44 y             |                      | 45-54 y              |                     | 55-64 y             |                      | 65-74 y              |                      | 75+ y                |                     |                                              |              |
|                               |                                | Males               | Females             | Males               | Females              | Males                | Females             | Males               | Females              | Males                | Females              | Males                | Females             |                                              | Both genders |
|                               |                                | Median (IQR)        | Median (IQR)        | Median (IQR)        | Median (IQR)         | Median (IQR)         | Median (IQR)        | Median (IQR)        | Median (IQR)         | Median (IQR)         | Median (IQR)         | Median (IQR)         | Median (IQR)        | Median (IQR)                                 |              |
| <b>Fruits (g/d)</b>           | <b>Overall by age</b>          | 0.1 (0, 101.3)      |                     | 2.2 (0, 123)        |                      | 11.8 (0, 151.3)      |                     | 37.1 (0, 174.5)     |                      | 96.7 (0, 208.5)      |                      | 101.1 (0, 215.6)     |                     | F: 25.3 (0, 144.8)<br>M: 7.3 (0, 139.5)      |              |
|                               | <b>Education</b>               |                     |                     |                     |                      |                      |                     |                     |                      |                      |                      |                      |                     |                                              |              |
|                               | <High-school                   | 0 (0, 50.2)         | 0.3 (0, 96)         | 0 (0, 65.5)         | 0 (0, 109.3)         | 0 (0, 136.1)         | 0 (0, 121.8)        | 0 (0, 107.9)        | 14.6 (0, 132.6)      | 54.5 (0, 157)        | 60.5 (0, 158.7)      | 25.5 (0, 156.1)      | 55.3 (0, 152.1)     | 0.1 (0, 124.1)                               |              |
|                               | High-school                    | 0 (0, 65.4)         | 0.1 (0, 65.2)       | 0 (0, 115.7)        | 0.1 (0, 104.1)       | 4 (0, 139.6)         | 10.2 (0, 137.4)     | 8.8 (0, 147.3)      | 50.1 (0, 138.7)      | 70.6 (0, 207.7)      | 115.7 (7.2, 212.5)   | 108.3 (0.4, 194.6)   | 121.5 (16.9, 231.9) | 8.3 (0, 134.2)                               |              |
|                               | College                        | 6.2 (0, 137)        | 46.2 (0, 161.2)     | 36.2 (0, 170.9)     | 35.9 (0, 178.6)      | 81.2 (0, 201.7)      | 62.9 (0, 185)       | 134.5 (0, 240)      | 96.1 (0.3, 238.9)    | 119.6 (9, 245.5)     | 145.6 (68.6, 241.6)  | 206.9 (78.1, 311.9)  | 119.5 (39, 216.3)   | 67.9 (0, 197.4)                              |              |
|                               | <b>Race</b>                    |                     |                     |                     |                      |                      |                     |                     |                      |                      |                      |                      |                     |                                              |              |
|                               | White                          | 0 (0, 82)           | 4.8 (0, 109.7)      | 0.2 (0, 123)        | 3.1 (0, 121.8)       | 11.8 (0, 155)        | 15.6 (0, 147.1)     | 16.2 (0, 171.3)     | 59.2 (0, 175)        | 72.9 (0, 215.7)      | 117.9 (4, 213.1)     | 113.1 (0.1, 238.9)   | 111.3 (9.6, 218.4)  | 19.5 (0, 148.2)                              |              |
|                               | Black                          | 0 (0, 19.2)         | 0 (0, 66.9)         | 0 (0, 116.6)        | 0 (0, 115.4)         | 0 (0, 119.9)         | 0 (0, 122.2)        | 0 (0, 107.1)        | 3.9 (0, 138.5)       | 43.3 (0, 139.2)      | 1.3 (0, 139.4)       | 0 (0, 74.3)          | 9.5 (0, 107.6)      | 0 (0, 115.7)                                 |              |
|                               | Hispanic                       | 0.1 (0, 109.8)      | 23.5 (0, 116.5)     | 8 (0, 107.5)        | 29.1 (0, 144.4)      | 19.2 (0, 166.1)      | 18.5 (0, 143)       | 67.7 (0, 196.6)     | 73.9 (0, 213.4)      | 117.7 (19.7, 260.6)  | 76.8 (0, 211)        | 107.5 (0, 194.6)     | 6.4 (0, 200.4)      | 24.9 (0, 139.8)                              |              |
|                               | Other                          | 0 (0, 2.3)          | 0 (0, 118.5)        | 36.1 (0, 228.1)     | 21.9 (0, 149.2)      | 32.1 (0, 202.7)      | 9.1 (0, 144.7)      | 67.8 (0, 306.3)     | 0 (0, 279.7)         | 77.8 (0, 289.6)      | 53.3 (0, 174.8)      | 0 (0, 204.3)         | 0 (0, 0)            | 9.1 (0, 144.7)                               |              |
| <b>Total</b>                  | 0 (0, 75)                      | 4.8 (0, 111.8)      | 1.2 (0, 124.3)      | 3 (0, 123)          | 9.9 (0, 155)         | 14.6 (0, 144.5)      | 15 (0, 173.1)       | 54.5 (0, 174.5)     | 74.9 (0, 209.7)      | 103.4 (0.3, 205.8)   | 105.2 (0, 228.9)     | 96.1 (3.8, 215.6)    | 14.2 (0, 141.8)     |                                              |              |
| <b>Vegetables (g/d)</b>       | <b>Overall by age</b>          | 122.6 (49.2, 236.5) |                     | 126.4 (48.2, 249)   |                      | 143.4 (46.9, 272.5)  |                     | 139.5 (49.8, 286.1) |                      | 163.5 (67.1, 282.1)  |                      | 137.4 (50.3, 257.8)  |                     | F: 144.2 (55, 280)<br>M: 129.2 (46.2, 239.6) |              |
|                               | <b>Education</b>               |                     |                     |                     |                      |                      |                     |                     |                      |                      |                      |                      |                     |                                              |              |
|                               | <High-school                   | 110.1 (49.9, 204.7) | 122.4 (55.3, 243.4) | 122.5 (40.7, 215)   | 65.5 (23.2, 180.3)   | 93.7 (0.2, 249.7)    | 120.2 (27, 239.4)   | 85.2 (1, 180.5)     | 132.4 (45.3, 285.1)  | 139.4 (52.5, 240.4)  | 178.7 (77.5, 298.9)  | 93.5 (24, 256.7)     | 114.7 (19.9, 238.9) | 114.5 (31, 228.4)                            |              |
|                               | High-school                    | 112.4 (38.3, 218)   | 109.4 (47.9, 231.9) | 98.8 (35.6, 208.3)  | 105.1 (39, 225.8)    | 129.3 (36.6, 224.5)  | 143.1 (46.9, 283)   | 110.5 (37.6, 249.5) | 165.7 (54.7, 310)    | 143.2 (51.6, 251)    | 167.9 (68.7, 302.2)  | 137.4 (62.1, 258.9)  | 155.8 (72.7, 283)   | 126.3 (45.1, 250.7)                          |              |
|                               | College                        | 146 (55, 253.7)     | 169 (80.2, 303.1)   | 162.3 (88, 302.4)   | 187.4 (82, 308.9)    | 163.7 (81.6, 288.8)  | 190.8 (85.1, 324.5) | 181.3 (86.3, 295.8) | 213.9 (80.3, 347.9)  | 147 (56.9, 259.9)    | 235.8 (156.6, 386.4) | 145.2 (80.1, 238.8)  | 150.1 (55.8, 236.4) | 173 (80.6, 302.4)                            |              |
|                               | <b>Race</b>                    |                     |                     |                     |                      |                      |                     |                     |                      |                      |                      |                      |                     |                                              |              |
|                               | White                          | 117 (48.7, 224.9)   | 137.5 (51, 231.9)   | 131.7 (52.8, 238.4) | 129.8 (51.4, 246.8)  | 140.6 (44.7, 239.6)  | 138.9 (55.2, 296.7) | 126.8 (45.4, 237.5) | 159.6 (61.8, 310)    | 138 (49.3, 247.6)    | 192 (80.6, 305.8)    | 121.9 (46.9, 243)    | 151.1 (65.8, 268)   | 137.4 (53.3, 258.9)                          |              |
|                               | Black                          | 85.8 (19.6, 181.1)  | 88.2 (40.1, 193)    | 99.9 (35.5, 236.8)  | 54 (5, 176.4)        | 62.5 (3, 188)        | 138.4 (38.7, 234.2) | 97.3 (9.7, 189.7)   | 185.7 (54.7, 320.3)  | 144.3 (33.9, 264.9)  | 191.5 (73.6, 327.8)  | 93.5 (32.9, 227.2)   | 113.5 (10.3, 180.9) | 96.3 (22.8, 219.9)                           |              |
|                               | Hispanic                       | 149.2 (65.5, 253)   | 159.8 (68.7, 304.1) | 172.1 (63.1, 271.8) | 150.4 (60.3, 267.6)  | 145.5 (65, 302.2)    | 192.9 (74, 284.2)   | 135.5 (62.3, 248.1) | 165.8 (45.3, 319.1)  | 154.3 (101.7, 310)   | 157.6 (73, 284)      | 161.4 (69.6, 279.4)  | 38.3 (19.2, 217.1)  | 154.1 (62.9, 274.8)                          |              |
|                               | Other                          | 55.1 (0, 117.8)     | 167 (51, 290.2)     | 116.2 (79.6, 195.9) | 208.1 (106.7, 308.9) | 163.7 (117.8, 277.9) | 274.7 (66, 355.1)   | 215.7 (11.3, 411.4) | 204.7 (103.4, 327.5) | 247.8 (218.3, 327.3) | 324.7 (71.4, 535.1)  | 231.4 (148.5, 259.6) | 0.2 (0, 198.8)      | 162.3 (61.7, 303)                            |              |
| <b>Total</b>                  | 115.5 (43.5, 223.3)            | 130.5 (55.3, 255.6) | 130.6 (52.8, 243.3) | 124.5 (46.4, 249.6) | 137.2 (40.6, 241)    | 156.6 (53.6, 299.3)  | 127.3 (40.9, 237.7) | 166.4 (61.8, 313.7) | 142.5 (55.3, 252.3)  | 186.9 (78.8, 305.9)  | 123.6 (48.3, 248.6)  | 143.5 (51.8, 259)    | 136.5 (50.1, 259.7) |                                              |              |
| <b>Nuts &amp; seeds (g/d)</b> | <b>Overall by age</b>          | 0 (0, 1.9)          |                     | 0 (0, 3.5)          |                      | 0 (0, 4.9)           |                     | 0 (0, 4.9)          |                      | 0 (0, 6.9)           |                      | 0 (0, 5.8)           |                     | F: 0 (0, 4.3)<br>M: 0 (0, 3.8)               |              |
|                               | <b>Education</b>               |                     |                     |                     |                      |                      |                     |                     |                      |                      |                      |                      |                     |                                              |              |
|                               | <High-school                   | 0 (0, 0)            | 0 (0, 3)            | 0 (0, 0)            | 0 (0, 0)             | 0 (0, 0)             | 0 (0, 0)            | 0 (0, 0)            | 0 (0, 1.3)           | 0 (0, 0)             | 0 (0, 0)             | 0 (0, 1.1)           | 0 (0, 2.6)          | 0 (0, 0)                                     |              |
|                               | High-school                    | 0 (0, 1)            | 0 (0, 1.9)          | 0 (0, 1.5)          | 0 (0, 4.3)           | 0 (0, 7.1)           | 0 (0, 4.3)          | 0 (0, 7.9)          | 0 (0, 2.3)           | 0 (0, 8.7)           | 0 (0, 3.2)           | 0 (0, 3.2)           | 0 (0, 8.5)          | 0 (0, 3.6)                                   |              |
|                               | College                        | 0 (0, 3.9)          | 0 (0, 7)            | 0 (0, 7.2)          | 0 (0, 10.4)          | 0.3 (0, 9.8)         | 0 (0, 9.5)          | 0 (0, 12.8)         | 0 (0, 5.5)           | 2.9 (0, 24.5)        | 6.8 (0, 25.9)        | 0 (0, 5.6)           | 0 (0, 8.1)          | 0 (0, 9.4)                                   |              |
|                               | <b>Race</b>                    |                     |                     |                     |                      |                      |                     |                     |                      |                      |                      |                      |                     |                                              |              |
|                               | White                          | 0 (0, 1.7)          | 0 (0, 4.1)          | 0 (0, 3)            | 0 (0, 8)             | 0 (0, 7.3)           | 0 (0, 6.4)          | 0 (0, 8.2)          | 0 (0, 5.4)           | 0 (0, 11.1)          | 0 (0, 6.8)           | 0 (0, 4.2)           | 0 (0, 8)            | 0 (0, 5.6)                                   |              |
|                               | Black                          | 0 (0, 0)            | 0 (0, 1.2)          | 0 (0, 0.2)          | 0 (0, 0)             | 0 (0, 0)             | 0 (0, 0.9)          | 0 (0, 0)            | 0 (0, 0.8)           | 0 (0, 3.2)           | 0 (0, 0)             | 0 (0, 1.1)           | 0 (0, 9.2)          | 0 (0, 0)                                     |              |
|                               | Hispanic                       | 0 (0, 0)            | 0 (0, 3.6)          | 0 (0, 3.2)          | 0 (0, 0)             | 0 (0, 14.1)          | 0 (0, 1)            | 0 (0, 0)            | 0 (0, 0)             | 0 (0, 0)             | 0 (0, 0)             | 0 (0, 0)             | 0 (0, 0)            | 0 (0, 0)                                     |              |
|                               | Other                          | 0 (0, 0)            | 0 (0, 0)            | 0 (0, 0)            | 0 (0, 1.1)           | 0 (0, 0)             | 0 (0, 0)            | 0 (0, 1.4)          | 0 (0, 1.3)           | 0 (0, 0)             | 0 (0, 11.8)          | 0 (0, 0)             | 0 (0, 8.4)          | 0 (0, 0)                                     |              |
| <b>Total</b>                  | 0 (0, 0.8)                     | 0 (0, 3.6)          | 0 (0, 2.5)          | 0 (0, 4.5)          | 0 (0, 7)             | 0 (0, 4.5)           | 0 (0, 6.6)          | 0 (0, 3.1)          | 0 (0, 9.7)           | 0 (0, 3.5)           | 0 (0, 2.8)           | 0 (0, 7.5)           | 0 (0, 4.1)          |                                              |              |
| <b>Whole grains (g/d)</b>     | <b>Overall by age</b>          | 0 (0, 11.5)         |                     | 0 (0, 14.2)         |                      | 0.5 (0, 20.9)        |                     | 4 (0, 21.1)         |                      | 7.3 (0, 29.7)        |                      | 10.5 (0, 34.4)       |                     | F: 1.7 (0, 20.9)<br>M: 0 (0, 17.7)           |              |
|                               | <b>Education</b>               |                     |                     |                     |                      |                      |                     |                     |                      |                      |                      |                      |                     |                                              |              |

**eTable 10. US consumption levels (median and inter-quartile range) for key dietary factors in 1999-2002 by population subgroups (continued)**

| Dietary Factor <sup>a</sup>         | Population Strata <sup>b</sup> | Age                |                |                 |                 |                  |                |                 |                |                 |                  |                  |                  |                                       |
|-------------------------------------|--------------------------------|--------------------|----------------|-----------------|-----------------|------------------|----------------|-----------------|----------------|-----------------|------------------|------------------|------------------|---------------------------------------|
|                                     |                                | 25-34 y            |                | 35-44 y         |                 | 45-54 y          |                | 55-64 y         |                | 65-74 y         |                  | 75+ y            |                  | 25+ y                                 |
|                                     |                                | Males              | Females        | Males           | Females         | Males            | Females        | Males           | Females        | Males           | Females          | Males            | Females          | Both genders                          |
|                                     |                                | Median (IQR)       | Median (IQR)   | Median (IQR)    | Median (IQR)    | Median (IQR)     | Median (IQR)   | Median (IQR)    | Median (IQR)   | Median (IQR)    | Median (IQR)     | Median (IQR)     | Median (IQR)     | Median (IQR)                          |
|                                     | <High-school                   | 0 (0, 0)           | 0 (0, 6.6)     | 0 (0, 1.3)      | 0 (0, 1.1)      | 0 (0, 13.5)      | 0 (0, 1.4)     | 0 (0, 10.3)     | 0 (0, 16.3)    | 1.2 (0, 22.8)   | 0.3 (0, 17.4)    | 5.8 (0, 32.2)    | 0 (0, 16.7)      | 0 (0, 10.4)                           |
|                                     | High-school                    | 0 (0, 10.4)        | 0 (0, 11.1)    | 0 (0, 8.8)      | 0 (0, 13.3)     | 0 (0, 16.2)      | 3 (0, 23.6)    | 0.7 (0, 17.3)   | 5.9 (0, 21.5)  | 11 (0, 39.4)    | 7 (0, 26.7)      | 13.2 (0.9, 39.3) | 12 (0, 39.2)     | 0.8 (0, 17.8)                         |
|                                     | College                        | 0 (0, 15.9)        | 4.7 (0, 30.3)  | 6.3 (0, 25.5)   | 5.8 (0, 24)     | 2.2 (0, 21.7)    | 10.4 (0, 40.5) | 9.1 (0, 31.4)   | 9.6 (0, 23)    | 10.1 (0, 32.4)  | 22.2 (8.9, 43.5) | 22.3 (9.3, 60)   | 14.2 (5.2, 45.4) | 7.7 (0, 28.9)                         |
|                                     | <b>Race</b>                    |                    |                |                 |                 |                  |                |                 |                |                 |                  |                  |                  |                                       |
|                                     | White                          | 0 (0, 11.3)        | 0.2 (0, 18.7)  | 0 (0, 17.7)     | 2.2 (0, 18.1)   | 1.4 (0, 20.8)    | 4.4 (0, 26.8)  | 4 (0, 22.6)     | 7.3 (0, 21.8)  | 10.1 (0, 36)    | 8.6 (0, 30.4)    | 14.8 (0, 41.5)   | 10.5 (0, 32)     | 3.3 (0, 22.4)                         |
|                                     | Black                          | 0 (0, 9.1)         | 0 (0, 11.5)    | 0 (0, 10)       | 0 (0, 8.4)      | 0 (0, 9)         | 0 (0, 5.4)     | 0 (0, 8.7)      | 0 (0, 11.3)    | 1.4 (0, 22.4)   | 0.2 (0, 11.8)    | 0 (0, 14.8)      | 0 (0, 9.5)       | 0 (0, 10.4)                           |
|                                     | Hispanic                       | 0 (0, 0)           | 0 (0, 8.9)     | 0 (0, 4.1)      | 0 (0, 10.3)     | 0 (0, 9.9)       | 0 (0, 12.6)    | 0 (0, 23.9)     | 0 (0, 10.2)    | 0 (0, 6.6)      | 0 (0, 11.4)      | 0.7 (0, 17.7)    | 0.4 (0, 22.4)    | 0 (0, 8.8)                            |
|                                     | Other                          | 0 (0, 0)           | 19.9 (0, 43.1) | 0 (0, 15.4)     | 0 (0, 0)        | 0 (0, 0)         | 0 (0, 8)       | 0 (0, 55.3)     | 6.2 (0, 67.7)  | 6.2 (0, 67.9)   | 3.7 (0, 10.7)    | 10.4 (0, 139.2)  | 0 (0, 0)         | 0 (0, 17.5)                           |
|                                     | <b>Total</b>                   | 0 (0, 8.6)         | 0 (0, 15.1)    | 0 (0, 14.1)     | 0.1 (0, 14.5)   | 0 (0, 18.7)      | 1 (0, 23.6)    | 1.4 (0, 21.1)   | 5.8 (0, 21.3)  | 8.1 (0, 32.8)   | 7.1 (0, 28)      | 12.8 (0, 39.8)   | 8.8 (0, 30.5)    | 0.7 (0, 19.5)                         |
| <b>Red meats, unprocessed (g/d)</b> | <b>Overall by age</b>          | 14.3 (0, 91.1)     |                | 16.8 (0, 81.7)  |                 | 4.7 (0, 85.7)    |                | 19.2 (0, 87.5)  |                | 1.7 (0, 74.4)   |                  | 0 (0, 68)        |                  | F: 1.6 (0, 70.3)<br>M: 26.7 (0, 95.1) |
|                                     | <b>Education</b>               |                    |                |                 |                 |                  |                |                 |                |                 |                  |                  |                  |                                       |
|                                     | <High-school                   | 60 (0, 122.7)      | 52.3 (0, 107)  | 50.6 (0, 120.5) | 2.4 (0, 79.6)   | 4.9 (0, 117.3)   | 1.2 (0, 95.4)  | 30.7 (0, 103.9) | 31.1 (0, 80.5) | 11.1 (0, 81)    | 3.6 (0, 82.6)    | 17.2 (0, 105.8)  | 0 (0, 48.3)      | 20.7 (0, 95.4)                        |
|                                     | High-school                    | 17.8 (0, 85.4)     | 2.2 (0, 66)    | 32 (0, 97.1)    | 4.8 (0, 72.3)   | 40.4 (0, 111.8)  | 3.9 (0, 70.1)  | 46.1 (0, 100.6) | 14.7 (0, 84)   | 30.6 (0, 94.2)  | 0 (0, 59.5)      | 20.3 (0, 85.8)   | 0 (0, 61.9)      | 12.9 (0, 83.1)                        |
|                                     | College                        | 39.1 (0, 131.5)    | 0 (0, 50.7)    | 15.6 (0, 83.9)  | 5.2 (0, 70.3)   | 1.1 (0, 71)      | 0 (0, 59.1)    | 7.7 (0, 89.8)   | 0 (0, 72.6)    | 0 (0, 68.1)     | 0 (0, 58.8)      | 0 (0, 79.6)      | 0 (0, 28.3)      | 1.5 (0, 76.7)                         |
|                                     | <b>Race</b>                    |                    |                |                 |                 |                  |                |                 |                |                 |                  |                  |                  |                                       |
|                                     | White                          | 16.8 (0, 88.1)     | 2.3 (0, 78.6)  | 30 (0, 91.2)    | 10.5 (0, 71.4)  | 9.7 (0, 89.8)    | 0 (0, 69)      | 36.7 (0, 92.7)  | 6.8 (0, 84)    | 16.2 (0, 81)    | 0 (0, 62.3)      | 18.8 (0, 89.2)   | 0 (0, 55.6)      | 5.3 (0, 81.7)                         |
|                                     | Black                          | 36 (0, 102.1)      | 11 (0, 67.5)   | 17.2 (0, 92)    | 0 (0, 67.2)     | 11 (0, 106.7)    | 0 (0, 84.3)    | 29.4 (0, 110.2) | 0 (0, 42.6)    | 0 (0, 68.6)     | 1.3 (0, 63.7)    | 0 (0, 88.5)      | 0 (0, 43.6)      | 2.8 (0, 79.7)                         |
|                                     | Hispanic                       | 51.2 (0, 117.4)    | 7.4 (0, 67.5)  | 46.2 (0, 105)   | 0.4 (0, 77.4)   | 35.2 (0, 108.4)  | 4.9 (0, 60)    | 10.9 (0, 90.7)  | 37.3 (0, 101)  | 52.9 (0, 124.8) | 0 (0, 71.7)      | 41.7 (0, 90)     | 0.6 (0, 54.3)    | 24 (0, 92.5)                          |
|                                     | Other                          | 101.8 (2.6, 173.2) | 0 (0, 40.6)    | 49.5 (0, 105.1) | 70.3 (0, 126.2) | 86.7 (11.7, 115) | 45.4 (0, 95.2) | 5.4 (0, 70.9)   | 0 (0, 39)      | 0 (0, 48.2)     | 15.7 (0, 61.5)   | 0 (0, 290.1)     | 3.2 (0, 127.2)   | 37.9 (0, 101.8)                       |
|                                     | <b>Total</b>                   | 29.5 (0, 103.6)    | 2.3 (0, 72.7)  | 30.3 (0, 94.7)  | 3.9 (0, 72.8)   | 19.3 (0, 96.9)   | 0.7 (0, 69)    | 31.3 (0, 92.7)  | 10.3 (0, 78.2) | 11.1 (0, 82.7)  | 0 (0, 62.6)      | 17.2 (0, 89.5)   | 0 (0, 54)        | 8.7 (0, 84.2)                         |
| <b>Processed meats (g/d)</b>        | <b>Overall by age</b>          | 0 (0, 45.5)        |                | 0 (0, 45.8)     |                 | 0 (0, 44.2)      |                | 0 (0, 40.8)     |                | 0 (0, 46.9)     |                  | 0 (0, 35.1)      |                  | F: 0 (0, 32.5)<br>M: 5.6 (0, 56)      |
|                                     | <b>Education</b>               |                    |                |                 |                 |                  |                |                 |                |                 |                  |                  |                  |                                       |
|                                     | <High-school                   | 0 (0, 46.7)        | 0 (0, 32.4)    | 0 (0, 51.1)     | 0 (0, 43.5)     | 0 (0, 50.8)      | 0 (0, 34.4)    | 21 (0, 60.2)    | 0 (0, 26.1)    | 14.5 (0, 57.5)  | 0 (0, 33.4)      | 0 (0, 46.5)      | 0 (0, 41.7)      | 0 (0, 43.3)                           |
|                                     | High-school                    | 0 (0, 58.2)        | 0 (0, 42.5)    | 18.9 (0, 69.3)  | 0 (0, 37.8)     | 11.9 (0, 62.6)   | 0 (0, 31.4)    | 16.7 (0, 57.9)  | 0 (0, 30.4)    | 12.7 (0, 55.2)  | 0 (0, 37)        | 0 (0, 38)        | 0 (0, 32.4)      | 0 (0, 48.1)                           |
|                                     | College                        | 0 (0, 45.5)        | 0 (0, 22.1)    | 0 (0, 32.4)     | 0 (0, 24.1)     | 0 (0, 61.6)      | 0 (0, 15.7)    | 0 (0, 29.9)     | 0 (0, 30.1)    | 0 (0, 44.9)     | 0 (0, 51.9)      | 0 (0, 47.3)      | 0 (0, 20.2)      | 0 (0, 32.4)                           |
|                                     | <b>Race</b>                    |                    |                |                 |                 |                  |                |                 |                |                 |                  |                  |                  |                                       |
|                                     | White                          | 7.2 (0, 61.8)      | 0 (0, 38.1)    | 11.7 (0, 60.3)  | 0 (0, 37.8)     | 10.6 (0, 62.6)   | 0 (0, 30.7)    | 15.8 (0, 57.7)  | 0 (0, 32.9)    | 11 (0, 53.2)    | 0 (0, 41.7)      | 0 (0, 48.7)      | 0 (0, 34.8)      | 0 (0, 47.8)                           |
|                                     | Black                          | 2.7 (0, 53.3)      | 0 (0, 47.8)    | 12.3 (0, 71.3)  | 0 (0, 49.8)     | 0 (0, 34.2)      | 0 (0, 34.4)    | 0 (0, 42.6)     | 0 (0, 23.3)    | 19.4 (0, 65.2)  | 0 (0, 30.2)      | 18.2 (0, 42.1)   | 0 (0, 17.3)      | 0 (0, 44.6)                           |
|                                     | Hispanic                       | 0 (0, 44.5)        | 0 (0, 21)      | 0 (0, 34.1)     | 0 (0, 28.2)     | 10.2 (0, 55.3)   | 0 (0, 10.3)    | 0 (0, 36.9)     | 0 (0, 5.9)     | 0 (0, 48.5)     | 0 (0, 0)         | 0 (0, 6.1)       | 0 (0, 0)         | 0 (0, 27.8)                           |
|                                     | Other                          | 0 (0, 28.4)        | 0 (0, 23.3)    | 0 (0, 0)        | 0 (0, 12.7)     | 0 (0, 23.7)      | 0 (0, 27.3)    | 0 (0, 0)        | 0 (0, 0)       | 0 (0, 0)        | 0 (0, 18.7)      | 0 (0, 0)         | 0 (0, 0)         | 0 (0, 13.5)                           |
|                                     | <b>Total</b>                   | 0 (0, 55.3)        | 0 (0, 35.9)    | 5.6 (0, 57.6)   | 0 (0, 34.6)     | 8.7 (0, 60.9)    | 0 (0, 28.3)    | 9.5 (0, 51.5)   | 0 (0, 29.3)    | 9.7 (0, 53.2)   | 0 (0, 36.1)      | 0 (0, 43.8)      | 0 (0, 34.1)      | 0 (0, 43.5)                           |
| <b>SSB (servings (8 oz)/d)</b>      | <b>Overall by age</b>          | 1.86 (0, 3.7)      |                | 1.23 (0, 3)     |                 | 0 (0, 2.14)      |                | 0 (0, 1.86)     |                | 0 (0, 1.2)      |                  | 0 (0, 1.14)      |                  | F: 0 (0, 2.14)<br>M: 1.07 (0, 2.74)   |
|                                     | <b>Education</b>               |                    |                |                 |                 |                  |                |                 |                |                 |                  |                  |                  |                                       |
|                                     | <High-school                   | 2.43 (1.22, 4.57)  | 2.02 (0, 4.15) | 2.13 (0, 3.81)  | 1.07 (0, 3.35)  | 0.82 (0, 3.16)   | 1.13 (0, 2.28) | 1 (0, 2.92)     | 0 (0, 1.94)    | 0 (0, 1.85)     | 0 (0, 1.31)      | 0 (0, 1.24)      | 0 (0, 1.49)      | 1 (0, 2.8)                            |
|                                     | High-school                    | 2.57 (0.83, 3.95)  | 1.8 (0, 3.7)   | 1.82 (0, 3.54)  | 1.27 (0, 3.08)  | 0.8 (0, 2.39)    | 0 (0, 2.16)    | 0.24 (0, 2.14)  | 0 (0, 1.96)    | 0 (0, 1.36)     | 0 (0, 0.75)      | 0 (0, 1.28)      | 0 (0, 0.88)      | 0.9 (0, 2.7)                          |
|                                     | College                        | 1.35 (0, 3.04)     | 0 (0, 1.96)    | 0.33 (0, 2.18)  | 0 (0, 1.35)     | 0 (0, 1.22)      | 0 (0, 1.92)    | 0 (0, 1.35)     | 0 (0, 1.08)    | 0 (0, 1.48)     | 0 (0, 0)         | 0 (0, 0)         | 0 (0, 0.59)      | 0 (0, 1.8)                            |
|                                     | <b>Race</b>                    |                    |                |                 |                 |                  |                |                 |                |                 |                  |                  |                  |                                       |



**eTable 10. US consumption levels (median and inter-quartile range) for key dietary factors in 1999-2002 by population subgroups (continued)**

| Dietary Factor <sup>a</sup>      | Population Strata <sup>b</sup> | Age                      |                       |                         |                         |                         |                         |                         |                         |                       |                         |                       |                       | 25+ y                                      |
|----------------------------------|--------------------------------|--------------------------|-----------------------|-------------------------|-------------------------|-------------------------|-------------------------|-------------------------|-------------------------|-----------------------|-------------------------|-----------------------|-----------------------|--------------------------------------------|
|                                  |                                | 25-34 y                  |                       | 35-44 y                 |                         | 45-54 y                 |                         | 55-64 y                 |                         | 65-74 y               |                         | 75+ y                 |                       |                                            |
|                                  |                                | Males                    | Females               | Males                   | Females                 | Males                   | Females                 | Males                   | Females                 | Males                 | Females                 | Males                 | Females               |                                            |
|                                  | Median (IQR)                   | Median (IQR)             | Median (IQR)          | Median (IQR)            | Median (IQR)            | Median (IQR)            | Median (IQR)            | Median (IQR)            | Median (IQR)            | Median (IQR)          | Median (IQR)            | Median (IQR)          | Median (IQR)          | Median (IQR)                               |
|                                  | White                          | 2.36 (0, 3.89)           | 1.48 (0, 3.88)        | 1.4 (0, 3.27)           | 0 (0, 2.41)             | 0 (0, 1.72)             | 0 (0, 1.92)             | 0 (0, 1.8)              | 0 (0, 1.61)             | 0 (0, 1.51)           | 0 (0, 0.51)             | 0 (0, 0.99)           | 0 (0, 1.08)           | 0 (0, 2.27)                                |
|                                  | Black                          | 2.33 (1.05, 3.93)        | 2.14 (0.63, 3.62)     | 1.99 (0, 3.55)          | 1.44 (0, 3.04)          | 2.08 (0, 3.91)          | 1.71 (0, 2.96)          | 1.46 (0, 3.15)          | 1.48 (0, 2.69)          | 0 (0, 2.08)           | 0 (0, 2.25)             | 1.33 (0, 2.86)        | 0.58 (0, 1.58)        | 1.67 (0, 3.32)                             |
|                                  | Hispanic                       | 2.16 (0.92, 3.76)        | 1.17 (0, 2.39)        | 1.42 (0, 2.91)          | 1.01 (0, 2.34)          | 0.91 (0, 2.61)          | 0 (0, 1.61)             | 0.88 (0, 3.41)          | 0 (0, 1.75)             | 0 (0, 1.36)           | 0 (0, 1.18)             | 0.7 (0, 1.63)         | 0 (0, 0.92)           | 1.07 (0, 2.4)                              |
|                                  | Other                          | 2.01 (1.18, 5.21)        | 0.15 (0, 2.23)        | 2.16 (0, 3.22)          | 1.12 (0, 3.67)          | 0 (0, 1.49)             | 1.69 (0, 2.23)          | 0 (0, 0.13)             | 0 (0, 1.86)             | 0 (0, 0)              | 0 (0, 0.85)             | 0.35 (0, 1.22)        | 0 (0, 0)              | 0.87 (0, 2.39)                             |
|                                  | <b>Total</b>                   | <b>2.29 (0.77, 3.91)</b> | <b>1.47 (0, 3.27)</b> | <b>1.48 (0, 3.27)</b>   | <b>0.56 (0, 2.64)</b>   | <b>0 (0, 2.14)</b>      | <b>0 (0, 2.15)</b>      | <b>0.17 (0, 1.93)</b>   | <b>0 (0, 1.8)</b>       | <b>0 (0, 1.51)</b>    | <b>0 (0, 0.75)</b>      | <b>0 (0, 1.18)</b>    | <b>0 (0, 1.11)</b>    | <b>0.6 (0, 2.4)</b>                        |
| <b>Polyunsaturated fats (%E)</b> | <b>Overall by age</b>          | 6.1 (4.4, 8.1)           |                       | 6.1 (4.5, 8.4)          |                         | 6.5 (4.8, 8.6)          |                         | 6.6 (4.9, 9.1)          |                         | 6.5 (4.8, 9)          |                         | 6.8 (5, 8.9)          |                       | F: 6.5 (4.8, 8.8)<br>M: 6.2 (4.5, 8.4)     |
|                                  | <b>Education</b>               |                          |                       |                         |                         |                         |                         |                         |                         |                       |                         |                       |                       |                                            |
|                                  | <High-school                   | 5.8 (4.1, 7.7)           | 6.2 (4.1, 8.5)        | 5.9 (4.2, 7.8)          | 6.1 (4.4, 8)            | 6.1 (4.4, 8)            | 6.3 (5.2, 8.8)          | 6.3 (4.4, 9)            | 5.7 (4.6, 8.5)          | 6.4 (4.4, 8.8)        | 6.2 (4.7, 8.8)          | 6.4 (4.3, 8)          | 7.3 (4.7, 8.9)        | 6.3 (4.5, 8.4)                             |
|                                  | High-school                    | 6.2 (4.7, 7.9)           | 6.1 (4.3, 8.3)        | 5.9 (4, 8.1)            | 6.4 (4.8, 8.9)          | 6.3 (4.8, 8.5)          | 6.9 (4.8, 9.4)          | 6.6 (5, 9)              | 6.7 (4.9, 9.2)          | 6.3 (4.6, 7.9)        | 6.8 (5.1, 9.5)          | 6.5 (4.9, 8.9)        | 7 (5.3, 9.2)          | 6.4 (4.7, 8.7)                             |
|                                  | College                        | 5.9 (4.2, 7.3)           | 6.2 (4.7, 8.4)        | 6.1 (4.5, 8.1)          | 6.5 (4.5, 9.2)          | 6.6 (4.8, 8.4)          | 6.2 (4.5, 8.4)          | 7 (4.8, 9.5)            | 7 (5.5, 10.5)           | 6.3 (4.8, 10.5)       | 6.9 (5.1, 9.5)          | 6.7 (4.6, 9)          | 8 (5.4, 10.6)         | 6.4 (4.7, 8.6)                             |
|                                  | <b>Race</b>                    |                          |                       |                         |                         |                         |                         |                         |                         |                       |                         |                       |                       |                                            |
|                                  | White                          | 6.2 (4.7, 7.8)           | 6.1 (4.3, 8.5)        | 5.9 (4.1, 7.8)          | 6.2 (4.7, 8.4)          | 6.4 (4.8, 8.4)          | 6.8 (4.9, 9.3)          | 7 (5, 9.5)              | 6.8 (5, 9.3)            | 6.4 (4.7, 8.8)        | 6.8 (5, 9.5)            | 6.5 (4.8, 8.7)        | 7.2 (5.2, 9.2)        | 6.4 (4.7, 8.7)                             |
|                                  | Black                          | 5.9 (4.9, 7.9)           | 6.3 (4.6, 8.2)        | 6.6 (4.9, 8.5)          | 6.8 (5.2, 9.4)          | 6.5 (4.4, 8.2)          | 6.8 (4.9, 8.4)          | 5.7 (4.2, 8.4)          | 7.2 (5.5, 9.9)          | 6.1 (4.4, 8.5)        | 7.1 (4.9, 9.7)          | 6 (3.6, 7.9)          | 8 (5.5, 9.7)          | 6.5 (4.8, 8.6)                             |
|                                  | Hispanic                       | 6.1 (4.3, 7.4)           | 6.7 (4.7, 8.1)        | 6.3 (4.4, 8.4)          | 6.5 (4.8, 8.8)          | 6.2 (4, 8.3)            | 6.6 (4.5, 8.3)          | 6.1 (4.3, 8.4)          | 5.3 (4.2, 8)            | 5.9 (4, 7.4)          | 6.1 (4.9, 8.6)          | 6.9 (4.4, 8.3)        | 5.6 (3.1, 9.6)        | 6.3 (4.4, 8.2)                             |
|                                  | Other                          | 4.5 (2.8, 6.6)           | 5.1 (3.3, 8.4)        | 5.7 (4.8, 8.4)          | 5.5 (4.8, 8.3)          | 7 (5.5, 8.7)            | 5.8 (3.9, 9.4)          | 6 (3.9, 7.4)            | 5.9 (3.3, 7.9)          | 5.4 (5, 9.7)          | 6.3 (5, 8)              | 5 (4.8, 12.5)         | 6.2 (5.5, 8.5)        | 5.6 (4.2, 8.5)                             |
|                                  | <b>Total</b>                   | <b>6.1 (4.5, 7.8)</b>    | <b>6.2 (4.4, 8.4)</b> | <b>6 (4.3, 8.1)</b>     | <b>6.3 (4.7, 8.8)</b>   | <b>6.4 (4.7, 8.4)</b>   | <b>6.7 (4.8, 9.2)</b>   | <b>6.7 (4.9, 9.2)</b>   | <b>6.6 (4.9, 9.1)</b>   | <b>6.3 (4.6, 8.7)</b> | <b>6.7 (5, 9.2)</b>     | <b>6.5 (4.7, 8.5)</b> | <b>7.2 (5.2, 9.3)</b> | <b>6.4 (4.7, 8.6)</b>                      |
| <b>Saturated fats (%E)</b>       | <b>Overall by age</b>          | 10.7 (8.1, 13)           |                       | 10.6 (8.1, 13.4)        |                         | 10.7 (8.2, 13.1)        |                         | 10.5 (8.1, 13.2)        |                         | 10.1 (7.7, 13)        |                         | 10.1 (7.9, 12.5)      |                       | F: 10.5 (8, 13.1)<br>M: 10.6 (8.1, 13.1)   |
|                                  | <b>Education</b>               |                          |                       |                         |                         |                         |                         |                         |                         |                       |                         |                       |                       |                                            |
|                                  | <High-school                   | 10 (7.4, 11.7)           | 10.3 (7.6, 12.9)      | 10.2 (6.8, 13.8)        | 10.8 (7.7, 13.8)        | 9.4 (7.5, 12)           | 10.3 (7.8, 14.1)        | 10.6 (7.8, 13.2)        | 10 (7.8, 13)            | 10.2 (8.1, 13.8)      | 10.1 (7.6, 12.5)        | 10.9 (8.5, 13.6)      | 9.8 (7.3, 12.4)       | 10.2 (7.6, 13)                             |
|                                  | High-school                    | 11 (8.5, 13.3)           | 10.7 (7.9, 13.2)      | 11.3 (8.5, 14)          | 10.6 (8.6, 13.2)        | 11.1 (8.6, 13)          | 10.8 (8.3, 13.3)        | 10.7 (8.7, 13.4)        | 11 (8.4, 13.6)          | 10.2 (7.5, 12.8)      | 10.6 (7.9, 13.5)        | 10.1 (8, 12.6)        | 10.3 (8.1, 12.3)      | 10.8 (8.3, 13.3)                           |
|                                  | College                        | 10.9 (8.4, 12.8)         | 10.9 (8.3, 13)        | 9.9 (8.1, 12.2)         | 10.4 (7.7, 13.3)        | 10.7 (7.3, 12.9)        | 10.3 (8, 12.9)          | 10.3 (8.3, 12.4)        | 9.8 (7.5, 13.5)         | 9.7 (8, 13.7)         | 9 (7.4, 12.2)           | 10 (6.9, 11.7)        | 9.2 (6.8, 11.8)       | 10.3 (7.8, 12.8)                           |
|                                  | <b>Race</b>                    |                          |                       |                         |                         |                         |                         |                         |                         |                       |                         |                       |                       |                                            |
|                                  | White                          | 11 (8.5, 13.3)           | 11.1 (8.3, 13.2)      | 11.3 (8.5, 14.1)        | 10.9 (8.5, 13.5)        | 11.1 (8.5, 13.1)        | 11 (8.4, 13.5)          | 11 (8.9, 13.4)          | 10.6 (8, 13.4)          | 10 (7.9, 13.4)        | 10.4 (8.1, 13)          | 10.6 (8, 13)          | 10.2 (7.9, 12.3)      | 10.9 (8.3, 13.3)                           |
|                                  | Black                          | 10.1 (8.5, 12.4)         | 9.9 (7.3, 12.7)       | 9.6 (6.8, 12.5)         | 10.2 (7.8, 13.3)        | 9.3 (6.3, 11.8)         | 9.2 (7.2, 11.9)         | 9.5 (6.4, 11.8)         | 9.4 (7.6, 12.4)         | 10.2 (7.5, 13.1)      | 9 (6.3, 11.5)           | 9.6 (6.9, 11.5)       | 8.9 (8.1, 10.7)       | 9.7 (7.3, 12.3)                            |
|                                  | Hispanic                       | 9.9 (7.2, 12.3)          | 10.1 (8.2, 12.8)      | 9.4 (7.9, 11.9)         | 9.8 (7.9, 12.7)         | 10 (8, 12.9)            | 10.3 (7.3, 14.6)        | 8.6 (6, 11.4)           | 10.3 (7.5, 14.6)        | 10.2 (8.2, 12.8)      | 9.1 (6.1, 12.5)         | 10.1 (8.3, 12.5)      | 10 (4, 11.9)          | 9.9 (7.7, 12.7)                            |
|                                  | Other                          | 10.7 (8.6, 12.2)         | 7.9 (5, 11.1)         | 8.2 (5.8, 10.6)         | 8.9 (7.8, 11)           | 7.5 (7.3, 12.2)         | 9 (5, 11.3)             | 7.2 (3.2, 8.6)          | 11.2 (5.9, 13)          | 6.3 (5.7, 6.5)        | 7.4 (6, 9.1)            | 7 (6.8, 14.8)         | 8 (5.4, 13.5)         | 8.8 (5.9, 11.5)                            |
|                                  | <b>Total</b>                   | <b>10.8 (8.3, 13)</b>    | <b>10.6 (8, 13)</b>   | <b>10.7 (8.1, 13.6)</b> | <b>10.6 (8.2, 13.3)</b> | <b>10.7 (8.2, 12.9)</b> | <b>10.7 (8.1, 13.4)</b> | <b>10.5 (8.4, 13.2)</b> | <b>10.5 (7.9, 13.4)</b> | <b>10 (7.8, 13.3)</b> | <b>10.1 (7.6, 12.8)</b> | <b>10.4 (8, 12.9)</b> | <b>10 (7.8, 12.3)</b> | <b>10.6 (8.1, 13.1)</b>                    |
| <b>Carbohydrates (%E)</b>        | <b>Overall by age</b>          | 51.7 (44.1, 59.6)        |                       | 50.2 (42, 58)           |                         | 49.3 (40.9, 57.1)       |                         | 49.5 (41.6, 57.3)       |                         | 50.8 (43, 58.1)       |                         | 52.7 (45.9, 58.8)     |                       | F: 51.8 (44, 59.4)<br>M: 49.2 (41.2, 56.9) |
|                                  | <b>Education</b>               |                          |                       |                         |                         |                         |                         |                         |                         |                       |                         |                       |                       |                                            |
|                                  | <High-school                   | 51 (42, 59.1)            | 53.9 (46, 62.1)       | 49.6 (40.5, 58.9)       | 52.8 (41.3, 60.7)       | 50.3 (41.1, 60.9)       | 49.8 (40.9, 57.2)       | 48 (42, 56.5)           | 52.6 (46.3, 60.9)       | 49.9 (42.1, 57)       | 52.7 (44.5, 59)         | 50.5 (41.9, 57.2)     | 54.4 (46.1, 60.9)     | 51.4 (42.9, 59.3)                          |
|                                  | High-school                    | 49 (43, 57.7)            | 53.1 (46.3, 62.3)     | 50.3 (42, 56.4)         | 50.7 (43, 58.9)         | 46.8 (39.4, 55.1)       | 50 (42.9, 57.9)         | 46.2 (39, 54.6)         | 50.9 (43, 58.3)         | 50.8 (42.9, 57.1)     | 51 (41.8, 58.6)         | 51.1 (45, 57.7)       | 53 (47, 58.7)         | 50.2 (42.7, 57.7)                          |
|                                  | College                        | 51.1 (43.7, 59.9)        | 52.6 (45.7, 59.7)     | 48.4 (40.4, 57.3)       | 50 (44.3, 60.7)         | 48.4 (39.3, 55.2)       | 51.4 (43.7, 60.8)       | 48.3 (40.5, 56.8)       | 47.4 (42.9, 58.5)       | 50 (42.8, 57.7)       | 50.3 (44.8, 57.3)       | 52.9 (46, 58.9)       | 52.1 (46.2, 58.1)     | 50.5 (42.7, 58)                            |
|                                  | <b>Race</b>                    |                          |                       |                         |                         |                         |                         |                         |                         |                       |                         |                       |                       |                                            |
|                                  | White                          | 49.1 (42.3, 58.4)        | 52.9 (45.3, 59.6)     | 48.7 (40.6, 56.5)       | 50 (43.3, 59.6)         | 47.5 (39.3, 55.1)       | 49.7 (42.8, 57.2)       | 46.1 (39.7, 54.7)       | 50.2 (42.8, 57.9)       | 50.2 (42.8, 57.4)     | 50.4 (42.9, 58.1)       | 51.3 (43.9, 57.6)     | 53.2 (46.9, 58.9)     | 49.9 (42.3, 57.4)                          |
|                                  | Black                          | 50.3 (43.8, 57.8)        | 53.9 (46.6, 63.1)     | 52.3 (44.6, 58.5)       | 48.9 (41.9, 55.9)       | 50.1 (41.6, 61.5)       | 52.3 (43.7, 58.6)       | 48.3 (38.3, 56.8)       | 52.4 (43.4, 61)         | 49.9 (42.1, 56.6)     | 53.4 (43.9, 60.9)       | 52.3 (45.5, 63.9)     | 51.5 (39.7, 61)       | 51.5 (42.9, 59.4)                          |
|                                  | Hispanic                       | 51.6 (44.8, 58.9)        | 53 (46, 59)           | 50.2 (43.6, 58.8)       | 53.6 (44.8, 60.9)       | 49.8 (39.4, 58.3)       | 54.2 (41.5, 59.9)       | 54.1 (46.3, 60.2)       | 53.2 (45.5, 62.7)       | 49.5 (42.9, 57.4)     | 55.2 (48.1, 63.7)       | 52.6 (48.4, 57)       | 56.4 (51.3, 68.5)     | 52.7 (44.4, 59.7)                          |
|                                  | Other                          | 52.4 (46.1, 59.9)        | 63.1 (52.8, 73.1)     | 51.4 (36.7, 59)         | 56.8 (48.4, 61.5)       | 46.2 (35.8, 51.1)       | 54.8 (47.2, 64.8)       | 53.7 (38, 60.3)         | 56.5 (45.6, 60.9)       | 51.6 (51.6, 57.6)     | 55.8 (47.3, 64.3)       | 51.8 (37.9, 55.8)     | 39.6 (39.6, 67.1)     | 53.4 (45.9, 63.1)                          |

**eTable 10. US consumption levels (median and inter-quartile range) for key dietary factors in 1999-2002 by population subgroups (continued)**

| Dietary Factor <sup>a</sup>    | Population Strata <sup>b</sup> | Age               |                   |                   |                    |                   |                    |                   |                    |                     |                    |                   |                   |                                              |
|--------------------------------|--------------------------------|-------------------|-------------------|-------------------|--------------------|-------------------|--------------------|-------------------|--------------------|---------------------|--------------------|-------------------|-------------------|----------------------------------------------|
|                                |                                | 25-34 y           |                   | 35-44 y           |                    | 45-54 y           |                    | 55-64 y           |                    | 65-74 y             |                    | 75+ y             |                   | 25+ y                                        |
|                                |                                | Males             | Females           | Males             | Females            | Males             | Females            | Males             | Females            | Males               | Females            | Males             | Females           | Both genders                                 |
|                                |                                | Median (IQR)      | Median (IQR)      | Median (IQR)      | Median (IQR)       | Median (IQR)      | Median (IQR)       | Median (IQR)      | Median (IQR)       | Median (IQR)        | Median (IQR)       | Median (IQR)      | Median (IQR)      | Median (IQR)                                 |
| <b>Total</b>                   |                                | 49.8 (43, 58.4)   | 53.1 (46, 61)     | 49.7 (40.7, 57.3) | 50.7 (43.3, 59.6)  | 48 (39.4, 55.8)   | 50.4 (42.9, 58.2)  | 47.3 (40.2, 55.4) | 51.2 (43.2, 58.8)  | 50.2 (42.8, 57.4)   | 51.3 (43.2, 58.6)  | 51.4 (44.4, 57.9) | 53.5 (46.6, 59.5) | 50.5 (42.7, 58.1)                            |
| <b>Seafood omega-3s (mg/d)</b> | <b>Overall by age</b>          | 25.8 (0, 72.5)    |                   | 29.3 (1.6, 71.9)  |                    | 29.5 (0, 73.1)    |                    | 29.2 (1, 73.2)    |                    | 28.9 (1, 71.6)      |                    | 20.5 (0, 61.3)    |                   | F: 26.2 (0, 68.7)<br>M: 29 (1.1, 74.5)       |
|                                | <b>Education</b>               |                   |                   |                   |                    |                   |                    |                   |                    |                     |                    |                   |                   |                                              |
|                                | <High-school                   | 35.3 (6.4, 89.5)  | 24.7 (0, 78)      | 37.4 (0, 84)      | 27.3 (3.3, 64.4)   | 26.9 (0, 72.6)    | 33 (0, 71.5)       | 24.7 (0, 60.5)    | 29.8 (0, 72.2)     | 31.9 (1.1, 63.3)    | 29.2 (0, 96.6)     | 18.4 (0, 57.6)    | 15.5 (0, 60.6)    | 27.9 (0, 70.9)                               |
|                                | High-school                    | 30.1 (0.7, 86.8)  | 18.1 (0, 72)      | 26.5 (0.6, 68.5)  | 32.4 (0, 67.9)     | 29.5 (2.1, 62.2)  | 22.3 (0, 62.8)     | 28.8 (1.8, 94.2)  | 23.9 (2.5, 63.5)   | 25.3 (0, 73.6)      | 28.3 (1, 61.3)     | 16.4 (0, 53.2)    | 24.5 (4.5, 76.2)  | 26 (0, 70)                                   |
|                                | College                        | 19.4 (0, 55.2)    | 22.5 (0, 68.7)    | 28.6 (4.5, 121.4) | 26.1 (0, 69.5)     | 44.4 (8.7, 133.3) | 27.9 (5.1, 76.4)   | 34 (5.6, 78)      | 41.6 (6.6, 86.9)   | 26.3 (5.1, 81.4)    | 25 (1, 54.4)       | 18.1 (0, 55)      | 29.3 (1, 110.6)   | 29.5 (2.8, 74.6)                             |
|                                | <b>Race</b>                    |                   |                   |                   |                    |                   |                    |                   |                    |                     |                    |                   |                   |                                              |
|                                | White                          | 22.2 (0.7, 72.5)  | 16.2 (0, 61.7)    | 22.9 (0, 71.3)    | 21.9 (0, 55.4)     | 32.9 (3.8, 73)    | 25.3 (0, 71.6)     | 27.3 (0.8, 73.5)  | 23.2 (2.4, 63.5)   | 26.3 (0.8, 68.7)    | 25.4 (0, 58.5)     | 18.1 (0, 55)      | 22.5 (2.4, 64.3)  | 23.5 (0, 66.7)                               |
|                                | Black                          | 66.7 (4.3, 148)   | 32.5 (6.1, 112.6) | 57.7 (16.2, 99.2) | 45.2 (14.1, 140.6) | 49.9 (1.2, 144.6) | 55.1 (11.9, 118.8) | 36.8 (0, 118.7)   | 53.1 (15.9, 121.6) | 51.9 (11, 111.7)    | 57 (4, 126.1)      | 20.5 (0, 45.9)    | 40.4 (14.4, 94.4) | 51.3 (9.5, 118.7)                            |
|                                | Hispanic                       | 30.4 (2.2, 79.9)  | 33 (1, 73.8)      | 30 (3.9, 71.6)    | 40.2 (5, 82)       | 16.5 (0, 56.7)    | 19.6 (0, 46.3)     | 29 (9.3, 60.6)    | 32.3 (0, 56.2)     | 36.2 (9.2, 60.5)    | 31.9 (0, 63.4)     | 10.8 (0, 64.1)    | 1.5 (0, 63.6)     | 30.4 (0, 67.4)                               |
|                                | Other                          | 36.6 (0, 54.7)    | 2.8 (0, 52.7)     | 41.2 (0, 282.1)   | 40.7 (13.9, 189.1) | 48.4 (6.3, 201.1) | 34.8 (0, 58.7)     | 201.9 (0, 659.9)  | 1.2 (0, 77.4)      | 230.1 (43.5, 294.7) | 56.7 (42.6, 150.5) | 43.5 (0, 732.3)   | 284.1 (0, 3439.4) | 34.8 (0, 85.1)                               |
|                                | <b>Total</b>                   | 29 (0.7, 74.9)    | 21.8 (0, 68.7)    | 28.6 (1.8, 74.8)  | 30.1 (1, 68.2)     | 32.9 (2.7, 75.7)  | 27.1 (0, 71.6)     | 29.5 (0.9, 78)    | 27 (1.1, 67.5)     | 28.9 (1, 74.4)      | 28.9 (1, 67.7)     | 18.1 (0, 55)      | 22.5 (1, 65.8)    | 27.5 (0, 72)                                 |
| <b>Sodium (mg/d)</b>           | <b>Overall by age</b>          | 3240 (2554, 3876) |                   | 3158 (2567, 3900) |                    | 3261 (2615, 3956) |                    | 3317 (2727, 4038) |                    | 3380 (2753, 4152)   |                    | 3352 (2797, 4021) |                   | F: 3295 (2649, 3981)<br>M: 3241 (2611, 3950) |
|                                | <b>Education</b>               |                   |                   |                   |                    |                   |                    |                   |                    |                     |                    |                   |                   |                                              |
|                                | <High-school                   | 3122 (2308, 3648) | 3012 (2454, 3680) | 3062 (2464, 3768) | 3127 (2396, 3810)  | 3040 (2380, 3716) | 3291 (2691, 3984)  | 3219 (2716, 4060) | 3357 (2833, 4128)  | 3540 (2667, 4157)   | 3307 (2647, 4337)  | 3256 (2811, 4018) | 3398 (2802, 4067) | 3213 (2575, 3894)                            |
|                                | High-school                    | 3221 (2587, 3876) | 3292 (2661, 4020) | 3054 (2544, 3847) | 3103 (2567, 3927)  | 3316 (2754, 4007) | 3257 (2492, 3851)  | 3266 (2692, 4032) | 3337 (2742, 3948)  | 3400 (2896, 4221)   | 3457 (2784, 4079)  | 3419 (2885, 4125) | 3320 (2780, 3917) | 3256 (2658, 3952)                            |
|                                | College                        | 3256 (2401, 4085) | 3396 (2871, 4131) | 3348 (2606, 4074) | 3351 (2636, 4107)  | 3226 (2574, 3938) | 3295 (2621, 4115)  | 3327 (2528, 4094) | 3243 (2769, 3761)  | 3235 (2669, 4105)   | 3302 (2955, 3766)  | 3333 (2900, 3998) | 3262 (2697, 4329) | 3323 (2648, 4058)                            |
|                                | <b>Race</b>                    |                   |                   |                   |                    |                   |                    |                   |                    |                     |                    |                   |                   |                                              |
|                                | White                          | 3308 (2557, 3804) | 3343 (2614, 3988) | 3158 (2596, 3899) | 3228 (2617, 3959)  | 3298 (2726, 3986) | 3261 (2502, 3917)  | 3287 (2658, 4091) | 3351 (2769, 4041)  | 3367 (2729, 4121)   | 3373 (2795, 4152)  | 3374 (2896, 4045) | 3352 (2780, 3954) | 3304 (2664, 3978)                            |
|                                | Black                          | 3394 (2731, 3840) | 3278 (2715, 3855) | 3160 (2594, 3768) | 3154 (2251, 3995)  | 2833 (2317, 3534) | 3080 (2615, 3663)  | 3242 (2613, 3923) | 3280 (2641, 3852)  | 3719 (2946, 4623)   | 3394 (2638, 4152)  | 3197 (2790, 3823) | 3560 (2831, 4097) | 3215 (2588, 3940)                            |
|                                | Hispanic                       | 2830 (2312, 3587) | 3136 (2654, 3829) | 3009 (2515, 3694) | 3045 (2480, 3911)  | 3112 (2430, 3839) | 3217 (2594, 3860)  | 3084 (2563, 3858) | 3232 (2711, 3820)  | 3373 (2559, 4062)   | 3188 (2679, 3579)  | 2827 (2462, 3575) | 3143 (2557, 4067) | 3102 (2490, 3820)                            |
|                                | Other                          | 3567 (2281, 4613) | 3056 (2894, 3839) | 3124 (2314, 4014) | 3124 (2172, 5153)  | 3898 (2847, 5991) | 3773 (3235, 4229)  | 3390 (2886, 4160) | 3573 (2871, 3954)  | 4670 (3231, 5532)   | 3457 (3229, 4224)  | 3780 (2786, 4183) | 4171 (3716, 4919) | 3518 (2713, 4354)                            |
|                                | <b>Total</b>                   | 3221 (2482, 3828) | 3267 (2659, 3947) | 3148 (2571, 3894) | 3189 (2567, 3972)  | 3250 (2653, 3966) | 3283 (2583, 3956)  | 3266 (2654, 4039) | 3336 (2771, 4010)  | 3393 (2742, 4157)   | 3363 (2772, 4127)  | 3356 (2841, 4034) | 3352 (2780, 4017) | 3261 (2636, 3962)                            |

<sup>a</sup> Dietary factors with probable or convincing evidence, based on criteria for assessing causality,<sup>11,13,14,86</sup> for etiologic relationships with cardiometabolic outcomes including coronary heart disease (CHD), stroke, type 2 diabetes, body mass index (BMI), or systolic blood pressure (SBP).<sup>9,10</sup> National Health and Nutrition Examination Survey (NHANES) data were used to inform nationally representative estimates of exposure to dietary factors, accounting for complex survey design and sampling weights as appropriate;<sup>3</sup> analyses are representative of the US population aged ≥25y. Specifically, sodium, macronutrient and energy intake were obtained from the Food and Nutrient Database for Dietary Studies, and intakes for food groups of interest were obtained from the MyPyramid Equivalents Database (MPED), for the 2002 estimate.<sup>90</sup> Servings in MPED were converted to grams per day. We estimated the mean and inter-quartile range (IQR) of dietary intakes for the entire population and relevant sub-groups (e.g., by age/sex/race) using data from the 1999-2000 and 2001-2002 cycles (n=8,104); data from a single 24-hour recall were used.<sup>88</sup> All factors were adjusted for energy using the residual method (2,000 kcal/d)<sup>89</sup> or as percent of energy (macronutrients). Optimal metrics and units for each dietary factor were defined to be consistent with definitions used in epidemiological studies that provided evidence on diet-disease relative risks.<sup>9</sup> Specifically, **fruits** were defined as: total fruits (g/d), excluding fruit juices and salted or pickled fruits; **vegetables**: total vegetables (g/d), including beans/legumes, and excluding salted, pickled, starchy vegetables (e.g., potatoes, corn) vegetables, or vegetable juices; **nuts/seeds**: total nuts and seeds (g/d); **whole grains**: total whole grain foods and grain-based products made with 100% whole grains or their flours (g/d); **red meats**: total red meats (g/d), excluding poultry, fish, eggs, and all processed meats; **processed meats**: total processed meat intake (g/d); **sugar-sweetened beverages (SSBs)**: total SSBs (servings [8 fluid ounces]/d) with ≥50 kcal per 8 oz (237 mL) serving, including carbonated soft drinks, fruit drinks, presweetened iced teas, sports drinks, energy drinks, and excluding 100% fruit and vegetable juices, non-caloric artificially-sweetened drinks, and alcoholic beverages (servings/d); **polyunsaturated fats (PUFA)**: total PUFA intake (%E/d); **saturated fats (SFA)**: total SFA intake (%E/d); **carbohydrates (carbs)**: total carbohydrate intake (%E/d); **seafood omega-3 fats**: total dietary eicosapentaenoic (EPA) + docosahexaenoic (DHA) (mg/d) intake, excluding supplements; **sodium**: total dietary sodium intake (mg/d).

<sup>b</sup> Population strata were assigned as follows: age (25-34, 35-44, 45-54, 55-64, 65-74, and ≥75 yrs), sex (male and female), education (<high-school: less than high school degree, high-school: high school degree/equivalent or some college, and College: ≥4-year college degree), and race/ethnicity (White: non-Hispanic White, Black: non-Hispanic Black, Hispanic: Mexican American/other Hispanic, and Other: other race/mixed race).

eTable 11. Cardiometabolic deaths in the US in 2012 by population subgroups.

| Disease <sup>a</sup>   | Population Strata <sup>b</sup> | Age        |             |            |              |            |              |            |              |            |              |            |               | Total                          |       |
|------------------------|--------------------------------|------------|-------------|------------|--------------|------------|--------------|------------|--------------|------------|--------------|------------|---------------|--------------------------------|-------|
|                        |                                | 25-34 y    |             | 35-44 y    |              | 45-54 y    |              | 55-64 y    |              | 65-74 y    |              | 75+ y      |               |                                | 25+ y |
|                        |                                | Males<br>N | Female<br>N | Males<br>N | Females<br>N  |                                |       |
| Coronary heart disease | <b>Overall by age</b>          | 1025       |             | 5181       |              | 21915      |              | 47713      |              | 62802      |              | 232630     |               | <b>M: 206537<br/>F: 164729</b> |       |
|                        | <b>Education</b>               |            |             |            |              |            |              |            |              |            |              |            |               |                                |       |
|                        | <High-school                   | 169        | 57          | 734        | 293          | 3193       | 1185         | 5992       | 2434         | 8891       | 4803         | 27341      | 34438         | 89530                          |       |
|                        | High-school                    | 513        | 170         | 2634       | 905          | 10926      | 3741         | 22084      | 8744         | 24567      | 13553        | 57859      | 74094         | 219790                         |       |
|                        | College                        | 75         | 33          | 418        | 122          | 1864       | 493          | 5455       | 1605         | 7039       | 2231         | 21796      | 12426         | 53557                          |       |
|                        | <b>Race</b>                    |            |             |            |              |            |              |            |              |            |              |            |               |                                |       |
|                        | White                          | 466        | 161         | 2527       | 920          | 11932      | 3797         | 26064      | 9124         | 33047      | 15779        | 93464      | 103054        | 300335                         |       |
|                        | Black                          | 174        | 71          | 752        | 283          | 2577       | 1249         | 5121       | 2695         | 4837       | 3286         | 7234       | 10672         | 38951                          |       |
|                        | Hispanic                       | 79         | 20          | 350        | 92           | 1188       | 349          | 2232       | 871          | 2477       | 1298         | 5412       | 6357          | 20725                          |       |
|                        | Other                          | 44         | 10          | 211        | 46           | 670        | 153          | 1191       | 415          | 1383       | 695          | 3105       | 3332          | 11255                          |       |
| <b>Total</b>           | 763                            | 262        | 3840        | 1341       | 16367        | 5548       | 34608        | 13105      | 41744        | 21058      | 109215       | 123415     | <b>371266</b> |                                |       |
| Ischemic stroke        | <b>Overall by age</b>          | 65         |             | 175        |              | 589        |              | 1199       |              | 2071       |              | 12026      |               | <b>M: 6413<br/>F: 9712</b>     |       |
|                        | <b>Education</b>               |            |             |            |              |            |              |            |              |            |              |            |               |                                |       |
|                        | <High-school                   | 4          | 5           | 20         | 8            | 69         | 48           | 156        | 110          | 273        | 253          | 1104       | 2133          | 4183                           |       |
|                        | High-school                    | 23         | 17          | 65         | 48           | 231        | 155          | 446        | 281          | 590        | 602          | 2041       | 4759          | 9258                           |       |
|                        | College                        | 4          | 11          | 8          | 20           | 39         | 28           | 112        | 60           | 196        | 94           | 878        | 944           | 2394                           |       |
|                        | <b>Race</b>                    |            |             |            |              |            |              |            |              |            |              |            |               |                                |       |
|                        | White                          | 18         | 18          | 56         | 48           | 193        | 157          | 505        | 286          | 817        | 684          | 3408       | 6598          | 12788                          |       |
|                        | Black                          | 8          | 9           | 16         | 18           | 109        | 58           | 159        | 114          | 180        | 175          | 379        | 777           | 2002                           |       |
|                        | Hispanic                       | 6          | 3           | 17         | 7            | 35         | 15           | 56         | 34           | 76         | 77           | 204        | 389           | 919                            |       |
|                        | Other                          | 0          | 3           | 6          | 7            | 16         | 6            | 24         | 21           | 30         | 32           | 95         | 176           | 416                            |       |
| <b>Total</b>           | 32                             | 33         | 95          | 80         | 353          | 236        | 744          | 455        | 1103         | 968        | 4086         | 7940       | <b>16125</b>  |                                |       |
| Hemorrhagic stroke     | <b>Overall by age</b>          | 379        |             | 1152       |              | 3303       |              | 4736       |              | 5794       |              | 17227      |               | <b>M: 14907<br/>F: 17684</b>   |       |
|                        | <b>Education</b>               |            |             |            |              |            |              |            |              |            |              |            |               |                                |       |
|                        | <High-school                   | 47         | 34          | 160        | 105          | 415        | 270          | 496        | 345          | 551        | 529          | 1469       | 2460          | 6881                           |       |
|                        | High-school                    | 147        | 105         | 384        | 321          | 1072       | 1085         | 1622       | 1416         | 1665       | 1864         | 3606       | 6420          | 19707                          |       |
|                        | College                        | 23         | 18          | 85         | 85           | 195        | 199          | 406        | 338          | 638        | 448          | 1633       | 1350          | 5418                           |       |
|                        | <b>Race</b>                    |            |             |            |              |            |              |            |              |            |              |            |               |                                |       |
|                        | White                          | 109        | 85          | 288        | 260          | 861        | 835          | 1569       | 1320         | 2176       | 2084         | 5715       | 8584          | 23886                          |       |
|                        | Black                          | 45         | 33          | 161        | 135          | 487        | 465          | 579        | 483          | 354        | 397          | 424        | 815           | 4378                           |       |
|                        | Hispanic                       | 47         | 28          | 140        | 75           | 266        | 179          | 293        | 182          | 198        | 246          | 367        | 552           | 2573                           |       |
|                        | Other                          | 17         | 15          | 46         | 47           | 111        | 99           | 162        | 148          | 178        | 161          | 314        | 456           | 1754                           |       |
| <b>Total</b>           | 218                            | 161        | 635         | 517        | 1725         | 1578       | 2603         | 2133       | 2906         | 2888       | 6820         | 10407      | <b>32591</b>  |                                |       |

eTable 11. Cardiometabolic deaths in the US in 2012 by population subgroups (continued)

| Disease <sup>a</sup>       | Population Strata <sup>b</sup> | Age        |             |            |             |             |             |             |             |             |              |              |               | Total                |       |
|----------------------------|--------------------------------|------------|-------------|------------|-------------|-------------|-------------|-------------|-------------|-------------|--------------|--------------|---------------|----------------------|-------|
|                            |                                | 25-34 y    |             | 35-44 y    |             | 45-54 y     |             | 55-64 y     |             | 65-74 y     |              | 75+ y        |               |                      | 25+ y |
|                            |                                | Males      | Female      | Males      | Females     | Males       | Females     | Males       | Females     | Males       | Females      | Males        | Females       |                      | 25+ y |
|                            |                                | N          | N           | N          | N           | N           | N           | N           | N           | N           | N            | N            | N             | N                    |       |
| Other stroke               | Overall by age                 | 91         |             | 403        |             | 1764        |             | 5138        |             | 10315       |              | 61867        |               | M: 31133<br>F: 48445 |       |
|                            | Education                      |            |             |            |             |             |             |             |             |             |              |              |               |                      |       |
|                            | <High-school                   | 11         | 6           | 41         | 44          | 262         | 170         | 662         | 417         | 1387        | 1155         | 5664         | 10869         | 20688                |       |
|                            | High-school                    | 31         | 30          | 164        | 105         | 641         | 487         | 1887        | 1380        | 3152        | 2935         | 10694        | 24434         | 45940                |       |
|                            | College                        | 5          | 7           | 19         | 21          | 98          | 66          | 417         | 240         | 887         | 548          | 4409         | 4737          | 11454                |       |
|                            | Race                           |            |             |            |             |             |             |             |             |             |              |              |               |                      |       |
|                            | White                          | 23         | 25          | 111        | 95          | 566         | 409         | 1909        | 1258        | 3917        | 3364         | 17482        | 34277         | 63436                |       |
|                            | Black                          | 17         | 9           | 78         | 56          | 294         | 234         | 784         | 572         | 1064        | 866          | 1784         | 3479          | 9237                 |       |
|                            | Hispanic                       | 6          | 8           | 34         | 15          | 99          | 64          | 233         | 159         | 360         | 287          | 1145         | 1775          | 4185                 |       |
|                            | Other                          | 1          | 2           | 9          | 5           | 64          | 34          | 139         | 84          | 253         | 204          | 761          | 1164          | 2720                 |       |
| <b>Total</b>               | <b>47</b>                      | <b>44</b>  | <b>232</b>  | <b>171</b> | <b>1023</b> | <b>741</b>  | <b>3065</b> | <b>2073</b> | <b>5594</b> | <b>4721</b> | <b>21172</b> | <b>40695</b> | <b>79578</b>  |                      |       |
| Stroke, total              | Overall by age                 | 535        |             | 1730       |             | 5656        |             | 11073       |             | 18180       |              | 91120        |               | M: 52453<br>F: 75841 |       |
|                            | Education                      |            |             |            |             |             |             |             |             |             |              |              |               |                      |       |
|                            | <High-school                   | 62         | 45          | 221        | 157         | 746         | 488         | 1314        | 872         | 2211        | 1937         | 8237         | 15462         | 31752                |       |
|                            | High-school                    | 201        | 152         | 613        | 474         | 1944        | 1727        | 3955        | 3077        | 5407        | 5401         | 16341        | 35613         | 74905                |       |
|                            | College                        | 32         | 36          | 112        | 126         | 332         | 293         | 935         | 638         | 1721        | 1090         | 6920         | 7031          | 19266                |       |
|                            | Race                           |            |             |            |             |             |             |             |             |             |              |              |               |                      |       |
|                            | White                          | 150        | 128         | 455        | 403         | 1620        | 1401        | 3983        | 2864        | 6910        | 6132         | 26605        | 49459         | 100110               |       |
|                            | Black                          | 70         | 51          | 255        | 209         | 890         | 757         | 1522        | 1169        | 1598        | 1438         | 2587         | 5071          | 15617                |       |
|                            | Hispanic                       | 59         | 39          | 191        | 97          | 400         | 258         | 582         | 375         | 634         | 610          | 1716         | 2716          | 7677                 |       |
|                            | Other                          | 18         | 20          | 61         | 59          | 191         | 139         | 325         | 253         | 461         | 397          | 1170         | 1796          | 4890                 |       |
| <b>Total</b>               | <b>297</b>                     | <b>238</b> | <b>962</b>  | <b>768</b> | <b>3101</b> | <b>2555</b> | <b>6412</b> | <b>4661</b> | <b>9603</b> | <b>8577</b> | <b>32078</b> | <b>59042</b> | <b>128294</b> |                      |       |
| Hypertensive heart disease | Overall by age                 | 377        |             | 1508       |             | 4037        |             | 6225        |             | 4863        |              | 18009        |               | M: 17469<br>F: 17550 |       |
|                            | Education                      |            |             |            |             |             |             |             |             |             |              |              |               |                      |       |
|                            | <High-school                   | 64         | 16          | 195        | 78          | 519         | 209         | 625         | 334         | 570         | 365          | 1642         | 3344          | 7961                 |       |
|                            | High-school                    | 184        | 61          | 702        | 314         | 1815        | 879         | 2790        | 1278        | 1698        | 1251         | 3136         | 6952          | 21060                |       |
|                            | College                        | 35         | 14          | 130        | 55          | 320         | 157         | 686         | 301         | 526         | 242          | 1205         | 1301          | 4972                 |       |
|                            | Race                           |            |             |            |             |             |             |             |             |             |              |              |               |                      |       |
|                            | White                          | 140        | 37          | 523        | 196         | 1576        | 621         | 2611        | 1103        | 1873        | 1200         | 4687         | 9248          | 23815                |       |
|                            | Black                          | 95         | 47          | 356        | 217         | 890         | 555         | 1233        | 685         | 769         | 530          | 882          | 1621          | 7880                 |       |
|                            | Hispanic                       | 37         | 6           | 121        | 36          | 216         | 82          | 281         | 135         | 197         | 116          | 386          | 632           | 2245                 |       |
|                            | Other                          | 14         | 1           | 47         | 12          | 75          | 22          | 128         | 49          | 113         | 65           | 219          | 334           | 1079                 |       |
| <b>Total</b>               | <b>286</b>                     | <b>91</b>  | <b>1047</b> | <b>461</b> | <b>2757</b> | <b>1280</b> | <b>4253</b> | <b>1972</b> | <b>2952</b> | <b>1911</b> | <b>6174</b>  | <b>11835</b> | <b>35019</b>  |                      |       |

eTable 11. Cardiometabolic deaths in the US in 2012 by population subgroups (continued)

| Disease <sup>a</sup>            | Population Strata <sup>b</sup> | Age     |        |         |         |         |         |         |         |         |         |       | Total        |                             |       |
|---------------------------------|--------------------------------|---------|--------|---------|---------|---------|---------|---------|---------|---------|---------|-------|--------------|-----------------------------|-------|
|                                 |                                | 25-34 y |        | 35-44 y |         | 45-54 y |         | 55-64 y |         | 65-74 y |         | 75+ y |              | 25+ y                       |       |
|                                 |                                | Males   | Female | Males   | Females | Males   | Females | Males   | Females | Males   | Females | Males |              | Females                     | 25+ y |
|                                 |                                |         |        |         |         |         |         |         |         |         |         |       | N            |                             |       |
| Rheumatic heart disease         | <b>Overall by age</b>          | 39      |        | 57      |         | 140     |         | 313     |         | 549     |         | 1973  |              | <b>M: 1007<br/>F: 2064</b>  |       |
|                                 | <b>Education</b>               |         |        |         |         |         |         |         |         |         |         |       |              |                             |       |
|                                 | <High-school                   | 4       | 6      | 5       | 6       | 19      | 15      | 19      | 40      | 27      | 79      | 109   | 283          | 612                         |       |
|                                 | High-school                    | 12      | 15     | 21      | 16      | 41      | 45      | 76      | 126     | 123     | 235     | 305   | 890          | 1905                        |       |
|                                 | College                        | 0       | 2      | 5       | 4       | 11      | 5       | 23      | 24      | 37      | 42      | 158   | 203          | 514                         |       |
|                                 | <b>Race</b>                    |         |        |         |         |         |         |         |         |         |         |       |              |                             |       |
|                                 | White                          | 8       | 10     | 17      | 14      | 41      | 37      | 87      | 130     | 149     | 269     | 539   | 1240         | 2541                        |       |
|                                 | Black                          | 2       | 7      | 8       | 8       | 16      | 21      | 9       | 31      | 20      | 39      | 11    | 62           | 234                         |       |
|                                 | Hispanic                       | 4       | 1      | 4       | 2       | 8       | 7       | 16      | 15      | 5       | 33      | 12    | 60           | 167                         |       |
|                                 | Other                          | 2       | 5      | 2       | 2       | 7       | 3       | 7       | 18      | 17      | 17      | 16    | 33           | 129                         |       |
| <b>Total</b>                    | 16                             | 23      | 31     | 26      | 72      | 68      | 119     | 194     | 191     | 358     | 578     | 1395  | <b>3071</b>  |                             |       |
| Cardiomyopathy and myocarditis  | <b>Overall by age</b>          | 505     |        | 1075    |         | 2245    |         | 3329    |         | 3908    |         | 11656 |              | <b>M: 13526<br/>F: 9192</b> |       |
|                                 | <b>Education</b>               |         |        |         |         |         |         |         |         |         |         |       |              |                             |       |
|                                 | <High-school                   | 75      | 23     | 119     | 61      | 273     | 117     | 384     | 188     | 542     | 282     | 1530  | 1557         | 5151                        |       |
|                                 | High-school                    | 236     | 99     | 523     | 217     | 1039    | 490     | 1444    | 693     | 1472    | 878     | 3185  | 3308         | 13584                       |       |
|                                 | College                        | 41      | 24     | 92      | 45      | 195     | 81      | 367     | 173     | 445     | 204     | 1285  | 630          | 3582                        |       |
|                                 | <b>Race</b>                    |         |        |         |         |         |         |         |         |         |         |       |              |                             |       |
|                                 | White                          | 191     | 72     | 395     | 168     | 938     | 399     | 1507    | 653     | 1845    | 968     | 5111  | 4527         | 16774                       |       |
|                                 | Black                          | 96      | 43     | 228     | 117     | 413     | 225     | 535     | 308     | 456     | 284     | 544   | 576          | 3825                        |       |
|                                 | Hispanic                       | 45      | 21     | 79      | 29      | 141     | 47      | 143     | 73      | 156     | 86      | 292   | 305          | 1417                        |       |
|                                 | Other                          | 25      | 12     | 47      | 12      | 50      | 32      | 69      | 41      | 65      | 48      | 155   | 146          | 702                         |       |
| <b>Total</b>                    | 357                            | 148     | 749    | 326     | 1542    | 703     | 2254    | 1075    | 2522    | 1386    | 6102    | 5554  | <b>22718</b> |                             |       |
| Atrial fibrillation and flutter | <b>Overall by age</b>          | 6       |        | 32      |         | 166     |         | 609     |         | 1637    |         | 17035 |              | <b>M: 7157<br/>F: 12328</b> |       |
|                                 | <b>Education</b>               |         |        |         |         |         |         |         |         |         |         |       |              |                             |       |
|                                 | <High-school                   | 1       | 0      | 3       | 1       | 16      | 9       | 69      | 39      | 169     | 142     | 1322  | 2755         | 4526                        |       |
|                                 | High-school                    | 3       | 1      | 13      | 10      | 85      | 34      | 248     | 144     | 506     | 504     | 3012  | 6969         | 11529                       |       |
|                                 | College                        | 1       | 0      | 3       | 1       | 13      | 4       | 58      | 34      | 184     | 93      | 1352  | 1382         | 3125                        |       |
|                                 | <b>Race</b>                    |         |        |         |         |         |         |         |         |         |         |       |              |                             |       |
|                                 | White                          | 4       | 1      | 11      | 5       | 81      | 31      | 295     | 168     | 737     | 629     | 5242  | 10306        | 17510                       |       |
|                                 | Black                          | 1       | 0      | 7       | 4       | 24      | 10      | 58      | 34      | 74      | 77      | 221   | 478          | 988                         |       |
|                                 | Hispanic                       | 0       | 0      | 2       | 2       | 10      | 4       | 20      | 16      | 35      | 33      | 187   | 298          | 607                         |       |
|                                 | Other                          | 0       | 0      | 0       | 1       | 4       | 2       | 10      | 8       | 34      | 18      | 100   | 203          | 380                         |       |
| <b>Total</b>                    | 5                              | 1       | 20     | 12      | 119     | 47      | 383     | 226     | 880     | 757     | 5750    | 11285 | <b>19485</b> |                             |       |

eTable 11. Cardiometabolic deaths in the US in 2012 by population subgroups (continued)

| Disease <sup>a</sup>                          | Population Strata <sup>b</sup> | Age     |        |         |         |         |         |         |         |         |         |       | Total |                      |       |
|-----------------------------------------------|--------------------------------|---------|--------|---------|---------|---------|---------|---------|---------|---------|---------|-------|-------|----------------------|-------|
|                                               |                                | 25-34 y |        | 35-44 y |         | 45-54 y |         | 55-64 y |         | 65-74 y |         | 75+ y |       | 25+ y                |       |
|                                               |                                | Males   | Female | Males   | Females | Males   | Females | Males   | Females | Males   | Females | Males |       | Females              | 25+ y |
|                                               |                                |         |        |         |         |         |         |         |         |         |         |       | N     |                      |       |
| Aortic aneurysm                               | Overall by age                 | 123     |        | 285     |         | 676     |         | 1199    |         | 1961    |         | 5519  |       | M: 5714<br>F: 4049   |       |
|                                               | Education                      |         |        |         |         |         |         |         |         |         |         |       |       |                      |       |
|                                               | <High-school                   | 15      | 6      | 33      | 6       | 61      | 21      | 108     | 35      | 223     | 126     | 640   | 677   | 1951                 |       |
|                                               | High-school                    | 59      | 11     | 160     | 43      | 361     | 122     | 561     | 222     | 744     | 464     | 1461  | 1802  | 6010                 |       |
|                                               | College                        | 18      | 10     | 29      | 10      | 82      | 23      | 198     | 46      | 271     | 89      | 574   | 276   | 1626                 |       |
|                                               | Race                           |         |        |         |         |         |         |         |         |         |         |       |       |                      |       |
|                                               | White                          | 48      | 18     | 116     | 34      | 352     | 106     | 684     | 224     | 1059    | 568     | 2433  | 2443  | 8085                 |       |
|                                               | Black                          | 24      | 5      | 62      | 17      | 100     | 45      | 117     | 51      | 110     | 79      | 122   | 174   | 906                  |       |
|                                               | Hispanic                       | 17      | 3      | 39      | 3       | 32      | 8       | 49      | 13      | 54      | 25      | 79    | 87    | 409                  |       |
| Other                                         | 7                              | 1       | 8      | 6       | 26      | 7       | 42      | 19      | 45      | 21      | 89      | 92    | 363   |                      |       |
| Total                                         | 96                             | 27      | 225    | 60      | 510     | 166     | 892     | 307     | 1268    | 693     | 2723    | 2796  | 9763  |                      |       |
| Peripheral vascular disease                   | Overall by age                 | 7       |        | 35      |         | 160     |         | 581     |         | 1105    |         | 5011  |       | M: 3087<br>F: 3812   |       |
|                                               | Education                      |         |        |         |         |         |         |         |         |         |         |       |       |                      |       |
|                                               | <High-school                   | 0       | 1      | 5       | 4       | 19      | 19      | 98      | 48      | 191     | 101     | 552   | 845   | 1883                 |       |
|                                               | High-school                    | 2       | 4      | 14      | 11      | 61      | 52      | 239     | 144     | 401     | 302     | 1016  | 1846  | 4092                 |       |
|                                               | College                        | 0       | 0      | 0       | 1       | 5       | 2       | 28      | 12      | 56      | 32      | 339   | 318   | 793                  |       |
|                                               | Race                           |         |        |         |         |         |         |         |         |         |         |       |       |                      |       |
|                                               | White                          | 2       | 2      | 10      | 14      | 61      | 49      | 260     | 142     | 508     | 328     | 1607  | 2516  | 5499                 |       |
|                                               | Black                          | 0       | 1      | 4       | 2       | 16      | 19      | 84      | 46      | 111     | 78      | 218   | 357   | 936                  |       |
|                                               | Hispanic                       | 0       | 1      | 5       | 0       | 5       | 4       | 22      | 11      | 33      | 31      | 89    | 139   | 340                  |       |
| Other                                         | 0                              | 1       | 0      | 0       | 5       | 1       | 9       | 7       | 9       | 7       | 29      | 56    | 124   |                      |       |
| Total                                         | 2                              | 5       | 19     | 16      | 87      | 73      | 375     | 206     | 661     | 444     | 1943    | 3068  | 6899  |                      |       |
| Endocarditis                                  | Overall by age                 | 53      |        | 81      |         | 174     |         | 277     |         | 238     |         | 374   |       | M: 721<br>F: 476     |       |
|                                               | Education                      |         |        |         |         |         |         |         |         |         |         |       |       |                      |       |
|                                               | <High-school                   | 8       | 7      | 15      | 7       | 31      | 11      | 31      | 16      | 23      | 20      | 38    | 42    | 249                  |       |
|                                               | High-school                    | 24      | 11     | 36      | 14      | 77      | 35      | 115     | 66      | 68      | 78      | 112   | 111   | 747                  |       |
|                                               | College                        | 2       | 0      | 6       | 1       | 9       | 4       | 31      | 17      | 29      | 17      | 54    | 14    | 184                  |       |
|                                               | Race                           |         |        |         |         |         |         |         |         |         |         |       |       |                      |       |
|                                               | White                          | 22      | 17     | 41      | 15      | 65      | 39      | 106     | 62      | 97      | 88      | 176   | 127   | 855                  |       |
|                                               | Black                          | 2       | 2      | 7       | 2       | 30      | 11      | 48      | 24      | 16      | 20      | 15    | 24    | 201                  |       |
|                                               | Hispanic                       | 6       | 0      | 9       | 4       | 17      | 2       | 18      | 8       | 9       | 4       | 8     | 6     | 91                   |       |
| Other                                         | 4                              | 0       | 2      | 1       | 9       | 1       | 6       | 5       | 1       | 3       | 7       | 11    | 50    |                      |       |
| Total                                         | 34                             | 19      | 59     | 22      | 121     | 53      | 178     | 99      | 123     | 115     | 206     | 168   | 1197  |                      |       |
| Other cardiovascular and circulatory diseases | Overall by age                 | 388     |        | 838     |         | 1734    |         | 3150    |         | 4670    |         | 25902 |       | M: 15135<br>F: 21547 |       |

eTable 11. Cardiometabolic deaths in the US in 2012 by population subgroups (continued)

| Disease <sup>a</sup>                  | Population Strata <sup>b</sup> | Age     |        |         |         |         |         |         |         |         |         |        | Total  |                                      |       |
|---------------------------------------|--------------------------------|---------|--------|---------|---------|---------|---------|---------|---------|---------|---------|--------|--------|--------------------------------------|-------|
|                                       |                                | 25-34 y |        | 35-44 y |         | 45-54 y |         | 55-64 y |         | 65-74 y |         | 75+ y  |        | 25+ y                                |       |
|                                       |                                | Males   | Female | Males   | Females | Males   | Females | Males   | Females | Males   | Females | Males  |        | Females                              | 25+ y |
|                                       | N                              | N       | N      | N       | N       | N       | N       | N       | N       | N       | N       | N      | N      |                                      |       |
|                                       | <b>Education</b>               |         |        |         |         |         |         |         |         |         |         |        |        |                                      |       |
|                                       | <High-school                   | 45      | 33     | 79      | 64      | 178     | 141     | 250     | 232     | 404     | 439     | 2106   | 3877   | 7848                                 |       |
|                                       | High-school                    | 140     | 116    | 296     | 264     | 609     | 542     | 1067    | 998     | 1336    | 1610    | 5023   | 10161  | 22162                                |       |
|                                       | College                        | 27      | 23     | 60      | 68      | 114     | 117     | 312     | 223     | 453     | 339     | 2376   | 2010   | 6122                                 |       |
|                                       | <b>Race</b>                    |         |        |         |         |         |         |         |         |         |         |        |        |                                      |       |
|                                       | White                          | 122     | 99     | 256     | 230     | 627     | 504     | 1256    | 1001    | 1797    | 1843    | 8715   | 14571  | 31021                                |       |
|                                       | Black                          | 52      | 52     | 108     | 116     | 191     | 206     | 267     | 340     | 267     | 355     | 389    | 868    | 3211                                 |       |
|                                       | Hispanic                       | 30      | 15     | 58      | 41      | 83      | 78      | 108     | 89      | 136     | 136     | 316    | 541    | 1631                                 |       |
|                                       | Other                          | 8       | 10     | 15      | 14      | 23      | 22      | 41      | 48      | 53      | 83      | 217    | 285    | 819                                  |       |
|                                       | <b>Total</b>                   | 212     | 176    | 437     | 401     | 924     | 810     | 1672    | 1478    | 2253    | 2417    | 9637   | 16265  | <b>36682</b>                         |       |
| <b>Cardiovascular disease, total</b>  | <b>Overall by age</b>          | 3058    |        | 10822   |         | 36903   |         | 74469   |         | 99913   |         | 409229 |        | <b>M: 322806</b><br><b>F: 311588</b> |       |
|                                       | <b>Education</b>               |         |        |         |         |         |         |         |         |         |         |        |        |                                      |       |
|                                       | <High-school                   | 443     | 194    | 1409    | 677     | 5055    | 2215    | 8890    | 4238    | 13251   | 8294    | 43517  | 63280  | 151463                               |       |
|                                       | High-school                    | 1374    | 640    | 5012    | 2268    | 16958   | 7667    | 32579   | 15492   | 36322   | 24276   | 91450  | 141746 | 375784                               |       |
|                                       | College                        | 231     | 142    | 855     | 433     | 2945    | 1179    | 8093    | 3073    | 10761   | 4379    | 36059  | 25591  | 93741                                |       |
|                                       | <b>Race</b>                    |         |        |         |         |         |         |         |         |         |         |        |        |                                      |       |
|                                       | White                          | 1153    | 545    | 4351    | 1999    | 17293   | 6984    | 36853   | 15471   | 48022   | 27804   | 148579 | 197491 | 506545                               |       |
|                                       | Black                          | 516     | 279    | 1787    | 975     | 5147    | 3098    | 8994    | 5383    | 8258    | 6186    | 12223  | 19903  | 72749                                |       |
|                                       | Hispanic                       | 277     | 106    | 858     | 306     | 2100    | 839     | 3471    | 1606    | 3736    | 2372    | 8497   | 11141  | 35309                                |       |
|                                       | Other                          | 122     | 60     | 393     | 153     | 1060    | 382     | 1828    | 863     | 2181    | 1354    | 5107   | 6288   | 19791                                |       |
|                                       | <b>Total</b>                   | 2068    | 990    | 7389    | 3433    | 25600   | 11303   | 51146   | 23323   | 62197   | 37716   | 174406 | 234823 | <b>634394</b>                        |       |
| <b>Diabetes, type 2</b>               | <b>Overall by age</b>          | 598     |        | 1724    |         | 5410    |         | 11659   |         | 15330   |         | 33193  |        | <b>M: 35564</b><br><b>F: 32350</b>   |       |
|                                       | <b>Education</b>               |         |        |         |         |         |         |         |         |         |         |        |        |                                      |       |
|                                       | <High-school                   | 81      | 57     | 242     | 135     | 699     | 421     | 1312    | 901     | 2115    | 1687    | 4260   | 6207   | 18117                                |       |
|                                       | High-school                    | 232     | 171    | 732     | 448     | 2265    | 1387    | 4638    | 2974    | 5122    | 4037    | 7783   | 10296  | 40085                                |       |
|                                       | College                        | 31      | 21     | 87      | 48      | 334     | 180     | 1004    | 523     | 1334    | 692     | 2478   | 1540   | 8272                                 |       |
|                                       | <b>Race</b>                    |         |        |         |         |         |         |         |         |         |         |        |        |                                      |       |
|                                       | White                          | 190     | 127    | 602     | 378     | 2055    | 1151    | 4726    | 2704    | 6131    | 4136    | 11342  | 13037  | 46579                                |       |
|                                       | Black                          | 96      | 81     | 279     | 182     | 754     | 561     | 1373    | 1092    | 1473    | 1391    | 1631   | 2939   | 11852                                |       |
|                                       | Hispanic                       | 50      | 31     | 140     | 65      | 401     | 216     | 729     | 492     | 825     | 701     | 1234   | 1667   | 6551                                 |       |
|                                       | Other                          | 10      | 13     | 60      | 18      | 178     | 94      | 334     | 209     | 351     | 322     | 600    | 743    | 2932                                 |       |
|                                       | <b>Total</b>                   | 346     | 252    | 1081    | 643     | 3388    | 2022    | 7162    | 4497    | 8780    | 6550    | 14807  | 18386  | <b>67914</b>                         |       |
| <b>Cardiometabolic disease, total</b> | <b>Overall by age</b>          | 3656    |        | 12546   |         | 42313   |         | 86128   |         | 115243  |         | 442422 |        | <b>M: 358370</b><br><b>F: 343938</b> |       |
|                                       | <b>Education</b>               |         |        |         |         |         |         |         |         |         |         |        |        |                                      |       |

**eTable 11. Cardiometabolic deaths in the US in 2012 by population subgroups (continued)**

| Disease <sup>a</sup> | Population Strata <sup>b</sup> | Age     |        |         |         |         |         |         |         |         |         |        |         | Total         |       |
|----------------------|--------------------------------|---------|--------|---------|---------|---------|---------|---------|---------|---------|---------|--------|---------|---------------|-------|
|                      |                                | 25-34 y |        | 35-44 y |         | 45-54 y |         | 55-64 y |         | 65-74 y |         | 75+ y  |         |               | 25+ y |
|                      |                                | Males   | Female | Males   | Females | Males   | Females | Males   | Females | Males   | Females | Males  | Females |               | 25+ y |
|                      | N                              | N       | N      | N       | N       | N       | N       | N       | N       | N       | N       | N      | N       |               |       |
|                      | <High-school                   | 524     | 251    | 1651    | 812     | 5754    | 2636    | 10202   | 5139    | 15366   | 9981    | 47777  | 69487   | 169580        |       |
|                      | High-school                    | 1606    | 811    | 5744    | 2716    | 19223   | 9054    | 37217   | 18466   | 41444   | 28313   | 99233  | 152042  | 415869        |       |
|                      | College                        | 262     | 163    | 942     | 481     | 3279    | 1359    | 9097    | 3596    | 12095   | 5071    | 38537  | 27131   | 102013        |       |
|                      | <b>Race</b>                    |         |        |         |         |         |         |         |         |         |         |        |         |               |       |
|                      | White                          | 1343    | 672    | 4953    | 2377    | 19348   | 8135    | 41579   | 18175   | 54153   | 31940   | 159921 | 210528  | 553124        |       |
|                      | Black                          | 612     | 360    | 2066    | 1157    | 5901    | 3659    | 10367   | 6475    | 9731    | 7577    | 13854  | 22842   | 84601         |       |
|                      | Hispanic                       | 327     | 137    | 998     | 371     | 2501    | 1055    | 4200    | 2098    | 4561    | 3073    | 9731   | 12808   | 41860         |       |
|                      | Other                          | 132     | 73     | 453     | 171     | 1238    | 476     | 2162    | 1072    | 2532    | 1676    | 5707   | 7031    | 22723         |       |
|                      | <b>Total</b>                   | 2414    | 1242   | 8470    | 4076    | 28988   | 13325   | 58308   | 27820   | 70977   | 44266   | 189213 | 253209  | <b>702308</b> |       |

<sup>a</sup> Disease-specific deaths in each stratum were obtained from the National Center for Health Statistics (NCHS) ([http://www.cdc.gov/nchs/data\\_access/Vitalstatsonline.htm](http://www.cdc.gov/nchs/data_access/Vitalstatsonline.htm)); uncertainty in the baseline number of deaths is not reported in NCHS. Deaths were excluded if in foreign residents (individuals dying in the US but whose place of residence is outside the US), at age <25 years, with missing age information (0.005%), or, in education-stratified analyses, with missing education information (2.1%). Cardiometabolic diseases (CMD) were defined using the International Classification of Diseases 10th revision (ICD-10). For the present analysis, we obtained data on deaths due to **coronary heart disease (CHD)**: I20-I25; **ischemic stroke**: I63, I65-I67 (except I67.4), I69.3, G45; **hemorrhagic stroke**: I60-I62, I69.0-I69.2, I67.4; **other stroke** (unclassified stroke or sequelae of stroke, not specified as haemorrhage or infarction): I64, I69.4, I69.8; **diabetes**: E10-E14 (except E10.2, E11.2, E12.2, E13.2); and **other cardiovascular diseases (other CVD)** including hypertensive heart disease (I11), rheumatic heart disease (I01, I02.0, I05-I09), cardiomyopathy and myocarditis (I42, I40), atrial fibrillation and flutter (I48), aortic aneurysm (I71), peripheral vascular disease (I73, I70.2), endocarditis (I33), and other cardiovascular and circulatory diseases (I00, I02.9, I27-I28 (except I27.1), I30-I32 (except I31.2, I31.3), I34-I39, I47, I70.8, I72, I77-I80, I82-I84, I86-I98). Diabetes deaths are those coded as proximally due to diabetes, and diabetes is also separately a risk factor for CVD deaths along with other risk factors such as smoking, high blood pressure, high cholesterol, obesity, physical inactivity, etc.

<sup>b</sup> Population strata were defined as follows to match the dietary inputs: age (25-34, 35-44, 45-54, 55-64, 65-74, and ≥75 yrs), sex (male and female), education (<high-school: less than high school degree [or those with 3 years of high school or less], high-school: high school degree/equivalent or some college [or those with at most 3 years of college and at least 4 years of high school], and College: ≥4-year college degree), and race/ethnicity (White: non-Hispanic White, Black: non-Hispanic Black, Hispanic: Mexican American/other Hispanic, and Other: other race/mixed race).



eTable 12. Cardiometabolic deaths in the US in 2002 by population subgroups.

| Disease <sup>a</sup>   | Population Strata <sup>†</sup> | Age        |              |            |              |            |              |            |              |            |              |            |              | Total                  |       |
|------------------------|--------------------------------|------------|--------------|------------|--------------|------------|--------------|------------|--------------|------------|--------------|------------|--------------|------------------------|-------|
|                        |                                | 25-34 y    |              | 35-44 y    |              | 45-54 y    |              | 55-64 y    |              | 65-74 y    |              | 75+ y      |              |                        | 25+ y |
|                        |                                | Males<br>N | Females<br>N |                        |       |
| Coronary heart disease | Overall by age                 | 996        |              | 7683       |              | 25575      |              | 47262      |              | 83867      |              | 328779     |              | M: 252609<br>F: 241553 |       |
|                        | Education                      |            |              |            |              |            |              |            |              |            |              |            |              |                        |       |
|                        | <High-school                   | 148        | 52           | 1181       | 397          | 3353       | 1176         | 7403       | 3421         | 14899      | 9103         | 45623      | 66386        | 153142                 |       |
|                        | High-school                    | 479        | 164          | 3701       | 1194         | 12017      | 3816         | 18785      | 8140         | 26901      | 17452        | 65494      | 95218        | 253361                 |       |
|                        | College                        | 65         | 29           | 572        | 154          | 2951       | 616          | 5055       | 1199         | 7873       | 2295         | 20527      | 15620        | 56956                  |       |
|                        | Race                           |            |              |            |              |            |              |            |              |            |              |            |              |                        |       |
|                        | White                          | 491        | 147          | 3886       | 1748         | 18258      | 5332         | 24900      | 7686         | 19827      | 30556        | 66480      | 146386       | 325697                 |       |
|                        | Black                          | 223        | 108          | 1953       | 92           | 1293       | 690          | 8727       | 5898         | 33309      | 173          | 73160      | 42708        | 168334                 |       |
|                        | Hispanic                       | 6          | 0            | 1          | 0            | 0          | 0            | 29         | 21           | 0          | 2            | 45         | 0            | 104                    |       |
| Other                  | 21                             | 0          | 0            | 3          | 0            | 2          | 0            | 1          | 0            | 0          | 0            | 0          | 27           |                        |       |
| Total                  | 741                            | 255        | 5840         | 1843       | 19551        | 6024       | 33656        | 13606      | 53136        | 30731      | 139685       | 189094     | 494162       |                        |       |
| Ischemic stroke        | Overall by age                 | 73         |              | 215        |              | 592        |              | 1033       |              | 2696       |              | 18850      |              | M: 8812<br>F: 14647    |       |
|                        | Education                      |            |              |            |              |            |              |            |              |            |              |            |              |                        |       |
|                        | <High-school                   | 13         | 3            | 23         | 19           | 70         | 52           | 162        | 106          | 419        | 376          | 2144       | 4292         | 7679                   |       |
|                        | High-school                    | 24         | 23           | 67         | 77           | 199        | 147          | 304        | 278          | 630        | 777          | 2876       | 6268         | 11670                  |       |
|                        | College                        | 2          | 3            | 7          | 13           | 53         | 29           | 86         | 26           | 205        | 113          | 1056       | 1294         | 2887                   |       |
|                        | Race                           |            |              |            |              |            |              |            |              |            |              |            |              |                        |       |
|                        | White                          | 21         | 16           | 58         | 63           | 182        | 98           | 489        | 303          | 1252       | 892          | 5652       | 10900        | 19926                  |       |
|                        | Black                          | 18         | 16           | 21         | 32           | 164        | 117          | 90         | 122          | 102        | 448          | 711        | 1273         | 3114                   |       |
|                        | Hispanic                       | 2          | 0            | 9          | 16           | 0          | 25           | 20         | 3            | 0          | 1            | 0          | 0            | 76                     |       |
| Other                  | 0                              | 0          | 14           | 2          | 3            | 3          | 1            | 5          | 0            | 1          | 3            | 311        | 343          |                        |       |
| Total                  | 41                             | 32         | 102          | 113        | 349          | 243        | 600          | 433        | 1354         | 1342       | 6366         | 12484      | 23459        |                        |       |
| Hemorrhagic stroke     | Overall by age                 | 403        |              | 1740       |              | 3670       |              | 4303       |              | 6268       |              | 16986      |              | M: 14566<br>F: 18804   |       |
|                        | Education                      |            |              |            |              |            |              |            |              |            |              |            |              |                        |       |
|                        | <High-school                   | 49         | 32           | 188        | 161          | 388        | 291          | 480        | 420          | 793        | 812          | 1778       | 3094         | 8486                   |       |
|                        | High-school                    | 114        | 135          | 499        | 594          | 1127       | 1114         | 1194       | 1260         | 1506       | 1828         | 2995       | 5797         | 18163                  |       |
|                        | College                        | 28         | 19           | 79         | 85           | 261        | 249          | 385        | 260          | 615        | 354          | 1191       | 1131         | 4657                   |       |
|                        | Race                           |            |              |            |              |            |              |            |              |            |              |            |              |                        |       |
|                        | White                          | 47         | 112          | 481        | 633          | 746        | 808          | 1598       | 1741         | 2985       | 1655         | 2839       | 7062         | 20707                  |       |
|                        | Black                          | 68         | 85           | 334        | 262          | 1139       | 951          | 533        | 304          | 86         | 1492         | 3460       | 3556         | 12270                  |       |
|                        | Hispanic                       | 30         | 2            | 20         | 1            | 25         | 0            | 25         | 32           | 18         | 16           | 0          | 0            | 169                    |       |
| Other                  | 59                             | 0          | 1            | 8          | 1            | 0          | 57           | 13         | 0            | 16         | 14           | 55         | 224          |                        |       |

eTable 12. Cardiometabolic deaths in the US in 2002 by population subgroups (continued)

| Disease <sup>a</sup>              | Population Strata <sup>†</sup> | Age                   |              |            |              |            |              |            |              |            |              |            | Total  |                              |                               |
|-----------------------------------|--------------------------------|-----------------------|--------------|------------|--------------|------------|--------------|------------|--------------|------------|--------------|------------|--------|------------------------------|-------------------------------|
|                                   |                                | 25-34 y               |              | 35-44 y    |              | 45-54 y    |              | 55-64 y    |              | 65-74 y    |              | 75+ y      |        | 25+ y                        |                               |
|                                   |                                | Males<br>N            | Females<br>N | Males<br>N | Females<br>N | Males<br>N | Females<br>N | Males<br>N | Females<br>N | Males<br>N | Females<br>N | Males<br>N |        |                              | Females<br>N                  |
|                                   | <b>Total</b>                   | 204                   | 199          | 836        | 904          | 1911       | 1759         | 2213       | 2090         | 3089       | 3179         | 6313       | 10673  | <b>33370</b>                 |                               |
| <b>Other stroke</b>               | <b>Overall by age</b>          | 92                    |              | 471        |              | 1795       |              | 4566       |              | 13053      |              | 85670      |        | <b>M: 39074<br/>F: 66573</b> |                               |
|                                   | <b>Education</b>               |                       |              |            |              |            |              |            |              |            |              |            |        |                              |                               |
|                                   | <High-school                   | 7                     | 11           | 60         | 45           | 199        | 157          | 748        | 516          | 2244       | 1869         | 9676       | 19630  | 35162                        |                               |
|                                   | High-school                    | 30                    | 34           | 133        | 144          | 609        | 480          | 1398       | 1107         | 3160       | 3509         | 12653      | 28560  | 51817                        |                               |
|                                   | College                        | 3                     | 4            | 19         | 19           | 122        | 74           | 298        | 166          | 894        | 494          | 4316       | 5534   | 11943                        |                               |
|                                   | <b>Race</b>                    |                       |              |            |              |            |              |            |              |            |              |            |        |                              |                               |
|                                   | White                          | 40                    | 49           | 181        | 43           | 766        | 26           | 878        | 372          | 2284       | 4772         | 17852      | 39320  | 66583                        |                               |
|                                   | Black                          | 0                     | 3            | 50         | 188          | 245        | 751          | 1768       | 1548         | 4494       | 1503         | 10500      | 17998  | 39048                        |                               |
|                                   | Hispanic                       | 0                     | 0            | 9          | 0            | 7          | 0            | 0          | 0            | 0          | 0            | 0          | 0      | 16                           |                               |
|                                   | Other                          | 0                     | 0            | 0          | 0            | 0          | 0            | 0          | 0            | 0          | 0            | 0          | 0      | 0                            |                               |
|                                   | <b>Total</b>                   | 40                    | 52           | 240        | 231          | 1018       | 777          | 2646       | 1920         | 6778       | 6275         | 28352      | 57318  | <b>105647</b>                |                               |
|                                   | <b>Stroke, total</b>           | <b>Overall by age</b> | 568          |            | 2426         |            | 6057         |            | 9902         |            | 22017        |            | 121506 |                              | <b>M: 62452<br/>F: 100024</b> |
|                                   |                                | <b>Education</b>      |              |            |              |            |              |            |              |            |              |            |        |                              |                               |
| <High-school                      |                                | 69                    | 46           | 271        | 225          | 657        | 500          | 1390       | 1042         | 3456       | 3057         | 13598      | 27016  | 51327                        |                               |
| High-school                       |                                | 168                   | 192          | 699        | 815          | 1935       | 1741         | 2896       | 2645         | 5296       | 6114         | 18524      | 40625  | 81650                        |                               |
| College                           |                                | 33                    | 26           | 105        | 117          | 436        | 352          | 769        | 452          | 1714       | 961          | 6563       | 7959   | 19487                        |                               |
| <b>Race</b>                       |                                |                       |              |            |              |            |              |            |              |            |              |            |        |                              |                               |
| White                             |                                | 108                   | 177          | 720        | 739          | 1694       | 932          | 2965       | 2416         | 6521       | 7319         | 26343      | 57282  | 107216                       |                               |
| Black                             |                                | 86                    | 104          | 405        | 482          | 1548       | 1819         | 2391       | 1974         | 4682       | 3443         | 14671      | 22827  | 54432                        |                               |
| Hispanic                          |                                | 32                    | 2            | 38         | 17           | 32         | 25           | 45         | 35           | 18         | 17           | 0          | 0      | 261                          |                               |
| Other                             |                                | 59                    | 0            | 15         | 10           | 4          | 3            | 58         | 18           | 0          | 17           | 17         | 366    | 567                          |                               |
| <b>Total</b>                      |                                | 285                   | 283          | 1178       | 1248         | 3278       | 2779         | 5459       | 4443         | 11221      | 10796        | 41031      | 80475  | <b>162476</b>                |                               |
| <b>Hypertensive heart disease</b> |                                | <b>Overall by age</b> | 297          |            | 1213         |            | 2882         |            | 3320         |            | 3895         |            | 14908  |                              | <b>M: 11629<br/>F: 14886</b>  |
|                                   |                                | <b>Education</b>      |              |            |              |            |              |            |              |            |              |            |        |                              |                               |
|                                   | <High-school                   | 38                    | 14           | 172        | 68           | 304        | 175          | 432        | 256          | 584        | 524          | 1485       | 3817   | 7869                         |                               |
|                                   | High-school                    | 147                   | 55           | 528        | 242          | 1170       | 615          | 1208       | 694          | 1007       | 1007         | 1974       | 5081   | 13728                        |                               |
|                                   | College                        | 17                    | 9            | 96         | 33           | 325        | 98           | 351        | 122          | 310        | 145          | 612        | 934    | 3052                         |                               |
|                                   | <b>Race</b>                    |                       |              |            |              |            |              |            |              |            |              |            |        |                              |                               |
|                                   | White                          | 178                   | 6            | 104        | 27           | 4          | 80           | 1727       | 128          | 1579       | 472          | 2048       | 2658   | 9011                         |                               |
|                                   | Black                          | 37                    | 75           | 745        | 337          | 1934       | 864          | 432        | 1033         | 509        | 1335         | 2332       | 7870   | 17503                        |                               |
|                                   | Hispanic                       | 0                     | 1            | 0          | 0            | 0          | 0            | 0          | 0            | 0          | 0            | 0          | 0      | 1                            |                               |
|                                   | Other                          | 0                     | 0            | 0          | 0            | 0          | 0            | 0          | 0            | 0          | 0            | 0          | 0      | 0                            |                               |

eTable 12. Cardiometabolic deaths in the US in 2002 by population subgroups (continued)

| Disease <sup>a</sup>                   | Population Strata <sup>†</sup> | Age        |              |            |              |            |              |            |              |            |              |            |              | Total                        |            |
|----------------------------------------|--------------------------------|------------|--------------|------------|--------------|------------|--------------|------------|--------------|------------|--------------|------------|--------------|------------------------------|------------|
|                                        |                                | 25-34 y    |              | 35-44 y    |              | 45-54 y    |              | 55-64 y    |              | 65-74 y    |              | 75+ y      |              |                              | 25+ y      |
|                                        |                                | Males<br>N | Females<br>N |                              | 25+ y<br>N |
|                                        | <b>Total</b>                   | 215        | 82           | 849        | 364          | 1938       | 944          | 2159       | 1161         | 2088       | 1807         | 4380       | 10528        | <b>26515</b>                 |            |
| <b>Rheumatic heart disease</b>         | <b>Overall by age</b>          | 36         |              | 94         |              | 235        |              | 432        |              | 701        |              | 2035       |              | <b>M: 1058<br/>F: 2475</b>   |            |
|                                        | <b>Education</b>               |            |              |            |              |            |              |            |              |            |              |            |              |                              |            |
|                                        | <High-school                   | 5          | 7            | 5          | 13           | 19         | 29           | 37         | 59           | 60         | 108          | 134        | 430          | 906                          |            |
|                                        | High-school                    | 12         | 11           | 33         | 27           | 58         | 88           | 82         | 173          | 127        | 280          | 236        | 859          | 1986                         |            |
|                                        | College                        | 1          | 0            | 2          | 6            | 11         | 12           | 27         | 21           | 47         | 41           | 116        | 172          | 456                          |            |
|                                        | <b>Race</b>                    |            |              |            |              |            |              |            |              |            |              |            |              |                              |            |
|                                        | White                          | 5          | 6            | 37         | 39           | 75         | 111          | 139        | 192          | 240        | 323          | 499        | 1405         | 3071                         |            |
|                                        | Black                          | 0          | 11           | 4          | 4            | 13         | 15           | 11         | 8            | 5          | 101          | 1          | 110          | 283                          |            |
|                                        | Hispanic                       | 11         | 1            | 0          | 2            | 5          | 10           | 5          | 70           | 0          | 9            | 1          | 7            | 121                          |            |
|                                        | Other                          | 2          | 0            | 3          | 5            | 0          | 6            | 1          | 6            | 0          | 23           | 1          | 11           | 58                           |            |
|                                        | <b>Total</b>                   | 18         | 18           | 44         | 50           | 93         | 142          | 156        | 276          | 245        | 456          | 502        | 1533         | <b>3533</b>                  |            |
| <b>Cardiomyopathy and myocarditis</b>  | <b>Overall by age</b>          | 676        |              | 1618       |              | 2638       |              | 3199       |              | 4958       |              | 14321      |              | <b>M: 15846<br/>F: 11564</b> |            |
|                                        | <b>Education</b>               |            |              |            |              |            |              |            |              |            |              |            |              |                              |            |
|                                        | <High-school                   | 106        | 50           | 210        | 91           | 289        | 116          | 468        | 241          | 882        | 472          | 2205       | 2504         | 7634                         |            |
|                                        | High-school                    | 301        | 104          | 723        | 336          | 1192       | 484          | 1177       | 631          | 1579       | 1075         | 3333       | 3682         | 14617                        |            |
|                                        | College                        | 55         | 23           | 102        | 58           | 270        | 109          | 325        | 110          | 487        | 147          | 1183       | 622          | 3491                         |            |
|                                        | <b>Race</b>                    |            |              |            |              |            |              |            |              |            |              |            |              |                              |            |
|                                        | White                          | 76         | 324          | 75         | 279          | 891        | 664          | 269        | 126          | 732        | 393          | 6664       | 6013         | 16506                        |            |
|                                        | Black                          | 397        | 110          | 782        | 228          | 987        | 96           | 1882       | 888          | 2412       | 1419         | 403        | 1222         | 10826                        |            |
|                                        | Hispanic                       | 13         | 0            | 0          | 2            | 0          | 0            | 0          | 26           | 0          | 2            | 4          | 9            | 56                           |            |
|                                        | Other                          | 3          | 2            | 1          | 2            | 0          | 0            | 0          | 8            | 0          | 0            | 6          | 0            | 22                           |            |
|                                        | <b>Total</b>                   | 489        | 187          | 1107       | 511          | 1878       | 760          | 2151       | 1048         | 3144       | 1814         | 7077       | 7244         | <b>27410</b>                 |            |
| <b>Atrial fibrillation and flutter</b> | <b>Overall by age</b>          | 1          |              | 13         |              | 59         |              | 236        |              | 884        |              | 8896       |              | <b>M: 3425<br/>F: 6664</b>   |            |
|                                        | <b>Education</b>               |            |              |            |              |            |              |            |              |            |              |            |              |                              |            |
|                                        | <High-school                   | 0          | 0            | 0          | 0            | 9          | 3            | 39         | 16           | 124        | 132          | 926        | 2011         | 3260                         |            |
|                                        | High-school                    | 1          | 0            | 10         | 3            | 25         | 10           | 68         | 55           | 215        | 241          | 1239       | 3118         | 4985                         |            |
|                                        | College                        | 0          | 0            | 0          | 0            | 4          | 5            | 27         | 18           | 72         | 35           | 468        | 607          | 1236                         |            |
|                                        | <b>Race</b>                    |            |              |            |              |            |              |            |              |            |              |            |              |                              |            |
|                                        | White                          | 1          | 0            | 1          | 3            | 40         | 6            | 32         | 18           | 355        | 444          | 2793       | 6036         | 9729                         |            |
|                                        | Black                          | 0          | 0            | 9          | 0            | 0          | 13           | 109        | 77           | 85         | 0            | 0          | 67           | 360                          |            |
|                                        | Hispanic                       | 0          | 0            | 0          | 0            | 0          | 0            | 0          | 0            | 0          | 0            | 0          | 0            | 0                            |            |
|                                        | Other                          | 0          | 0            | 0          | 0            | 0          | 0            | 0          | 0            | 0          | 0            | 0          | 0            | 0                            |            |
|                                        | <b>Total</b>                   | 1          | 0            | 10         | 3            | 40         | 19           | 141        | 95           | 440        | 444          | 2793       | 6103         | <b>10089</b>                 |            |

eTable 12. Cardiometabolic deaths in the US in 2002 by population subgroups (continued)

| Disease <sup>a</sup>        | Population Strata <sup>†</sup> | Age        |              |            |              |            |              |            |              |             |              |             | Total        |                            |            |
|-----------------------------|--------------------------------|------------|--------------|------------|--------------|------------|--------------|------------|--------------|-------------|--------------|-------------|--------------|----------------------------|------------|
|                             |                                | 25-34 y    |              | 35-44 y    |              | 45-54 y    |              | 55-64 y    |              | 65-74 y     |              | 75+ y       |              | 25+ y                      |            |
|                             |                                | Males<br>N | Females<br>N | Males<br>N | Females<br>N | Males<br>N | Females<br>N | Males<br>N | Females<br>N | Males<br>N  | Females<br>N | Males<br>N  |              | Females<br>N               | 25+ y<br>N |
| Aortic aneurysm             | Overall by age                 | 110        |              | 305        |              | 710        |              | 1460       |              | 3482        |              | 8705        |              | <b>M: 8978<br/>F: 5794</b> |            |
|                             | Education                      |            |              |            |              |            |              |            |              |             |              |             |              |                            |            |
|                             | <High-school                   | 11         | 6            | 30         | 12           | 66         | 17           | 208        | 78           | 554         | 300          | 1397        | 1163         | 3842                       |            |
|                             | High-school                    | 50         | 12           | 140        | 43           | 340        | 119          | 601        | 230          | 1268        | 663          | 2277        | 2324         | 8067                       |            |
|                             | College                        | 12         | 6            | 43         | 12           | 106        | 27           | 197        | 34           | 427         | 92           | 758         | 338          | 2052                       |            |
|                             | Race                           |            |              |            |              |            |              |            |              |             |              |             |              |                            |            |
|                             | White                          | 70         | 20           | 164        | 22           | 206        | 42           | 745        | 306          | 2254        | 748          | 4402        | 3372         | 12351                      |            |
|                             | Black                          | 11         | 7            | 65         | 50           | 306        | 99           | 347        | 62           | 115         | 340          | 264         | 667          | 2333                       |            |
|                             | Hispanic                       | 1          | 1            | 0          | 3            | 28         | 4            | 0          | 0            | 0           | 25           | 0           | 0            | 62                         |            |
|                             | Other                          | 0          | 0            | 0          | 1            | 0          | 25           | 0          | 0            | 0           | 0            | 0           | 0            | 26                         |            |
| <b>Total</b>                | <b>82</b>                      | <b>28</b>  | <b>229</b>   | <b>76</b>  | <b>540</b>   | <b>170</b> | <b>1092</b>  | <b>368</b> | <b>2369</b>  | <b>1113</b> | <b>4666</b>  | <b>4039</b> | <b>14772</b> |                            |            |
| Peripheral vascular disease | Overall by age                 | 14         |              | 44         |              | 181        |              | 506        |              | 1271        |              | 5810        |              | <b>M: 3246<br/>F: 4580</b> |            |
|                             | Education                      |            |              |            |              |            |              |            |              |             |              |             |              |                            |            |
|                             | <High-school                   | 1          | 3            | 2          | 8            | 19         | 18           | 75         | 68           | 236         | 168          | 821         | 1290         | 2709                       |            |
|                             | High-school                    | 2          | 5            | 10         | 20           | 62         | 54           | 146        | 136          | 327         | 354          | 996         | 1781         | 3893                       |            |
|                             | College                        | 0          | 1            | 0          | 3            | 5          | 6            | 33         | 13           | 59          | 36           | 256         | 304          | 716                        |            |
|                             | Race                           |            |              |            |              |            |              |            |              |             |              |             |              |                            |            |
|                             | White                          | 4          | 0            | 0          | 29           | 69         | 82           | 271        | 78           | 66          | 600          | 2159        | 3305         | 6663                       |            |
|                             | Black                          | 0          | 1            | 13         | 2            | 25         | 5            | 9          | 148          | 599         | 4            | 29          | 317          | 1152                       |            |
|                             | Hispanic                       | 0          | 9            | 0          | 0            | 0          | 0            | 0          | 0            | 0           | 0            | 0           | 0            | 9                          |            |
|                             | Other                          | 0          | 0            | 0          | 0            | 0          | 0            | 0          | 0            | 2           | 0            | 0           | 0            | 2                          |            |
| <b>Total</b>                | <b>4</b>                       | <b>10</b>  | <b>13</b>    | <b>31</b>  | <b>94</b>    | <b>87</b>  | <b>280</b>   | <b>226</b> | <b>667</b>   | <b>604</b>  | <b>2188</b>  | <b>3622</b> | <b>7826</b>  |                            |            |
| Endocarditis                | Overall by age                 | 44         |              | 90         |              | 174        |              | 168        |              | 238         |              | 427         |              | <b>M: 634<br/>F: 507</b>   |            |
|                             | Education                      |            |              |            |              |            |              |            |              |             |              |             |              |                            |            |
|                             | <High-school                   | 9          | 5            | 14         | 4            | 29         | 11           | 17         | 15           | 30          | 26           | 49          | 65           | 274                        |            |
|                             | High-school                    | 18         | 7            | 36         | 21           | 65         | 36           | 53         | 48           | 66          | 63           | 100         | 123          | 636                        |            |
|                             | College                        | 2          | 0            | 4          | 2            | 5          | 8            | 14         | 9            | 30          | 12           | 46          | 25           | 157                        |            |
|                             | Race                           |            |              |            |              |            |              |            |              |             |              |             |              |                            |            |
|                             | White                          | 24         | 1            | 60         | 28           | 31         | 17           | 29         | 77           | 133         | 105          | 202         | 218          | 925                        |            |
|                             | Black                          | 0          | 12           | 0          | 2            | 86         | 40           | 61         | 0            | 0           | 0            | 0           | 7            | 208                        |            |
|                             | Hispanic                       | 7          | 0            | 0          | 0            | 0          | 0            | 1          | 0            | 0           | 0            | 0           | 0            | 8                          |            |
|                             | Other                          | 0          | 0            | 0          | 0            | 0          | 0            | 0          | 0            | 0           | 0            | 0           | 0            | 0                          |            |
| <b>Total</b>                | <b>31</b>                      | <b>13</b>  | <b>60</b>    | <b>30</b>  | <b>117</b>   | <b>57</b>  | <b>91</b>    | <b>77</b>  | <b>133</b>   | <b>105</b>  | <b>202</b>   | <b>225</b>  | <b>1141</b>  |                            |            |

eTable 12. Cardiometabolic deaths in the US in 2002 by population subgroups (continued)

| Disease <sup>a</sup>                          | Population Strata <sup>†</sup> | Age         |              |             |              |              |              |              |              |              |               |               |               | Total                  |            |
|-----------------------------------------------|--------------------------------|-------------|--------------|-------------|--------------|--------------|--------------|--------------|--------------|--------------|---------------|---------------|---------------|------------------------|------------|
|                                               |                                | 25-34 y     |              | 35-44 y     |              | 45-54 y      |              | 55-64 y      |              | 65-74 y      |               | 75+ y         |               |                        | 25+ y      |
|                                               |                                | Males<br>N  | Females<br>N | Males<br>N  | Females<br>N | Males<br>N   | Females<br>N | Males<br>N   | Females<br>N | Males<br>N   | Females<br>N  | Males<br>N    | Females<br>N  |                        | 25+ y<br>N |
| Other cardiovascular and circulatory diseases | Overall by age                 | 412         |              | 970         |              | 1779         |              | 2519         |              | 4443         |               | 21514         |               | M: 12342<br>F: 19295   |            |
|                                               | Education                      |             |              |             |              |              |              |              |              |              |               |               |               |                        |            |
|                                               | <High-school                   | 27          | 31           | 108         | 73           | 177          | 144          | 232          | 253          | 519          | 644           | 2269          | 4472          | 8949                   |            |
|                                               | High-school                    | 131         | 140          | 300         | 282          | 560          | 538          | 707          | 795          | 1058         | 1411          | 3506          | 7469          | 16897                  |            |
|                                               | College                        | 23          | 36           | 56          | 79           | 145          | 112          | 193          | 162          | 367          | 214           | 1285          | 1360          | 4032                   |            |
|                                               | Race                           |             |              |             |              |              |              |              |              |              |               |               |               |                        |            |
|                                               | White                          | 117         | 79           | 298         | 139          | 681          | 660          | 860          | 989          | 1857         | 1523          | 6776          | 12558         | 26537                  |            |
|                                               | Black                          | 45          | 132          | 183         | 308          | 235          | 175          | 349          | 287          | 159          | 858           | 646           | 1484          | 4861                   |            |
|                                               | Hispanic                       | 15          | 1            | 19          | 15           | 8            | 13           | 3            | 14           | 4            | 17            | 22            | 20            | 151                    |            |
|                                               | Other                          | 16          | 7            | 4           | 4            | 6            | 1            | 8            | 9            | 25           | 0             | 6             | 2             | 88                     |            |
| <b>Total</b>                                  | <b>193</b>                     | <b>219</b>  | <b>504</b>   | <b>466</b>  | <b>930</b>   | <b>849</b>   | <b>1220</b>  | <b>1299</b>  | <b>2045</b>  | <b>2398</b>  | <b>7450</b>   | <b>14064</b>  | <b>31637</b>  |                        |            |
| Cardiovascular disease, total                 | Overall by age                 | 3154        |              | 14456       |              | 40290        |              | 69004        |              | 125756       |               | 526901        |               | M: 372219<br>F: 407342 |            |
|                                               | Education                      |             |              |             |              |              |              |              |              |              |               |               |               |                        |            |
|                                               | <High-school                   | 414         | 214          | 1993        | 891          | 4922         | 2189         | 10301        | 5449         | 21344        | 14534         | 68507         | 109154        | 239912                 |            |
|                                               | High-school                    | 1309        | 690          | 6180        | 2983         | 17424        | 7501         | 25723        | 13547        | 37844        | 28660         | 97679         | 160280        | 399820                 |            |
|                                               | College                        | 208         | 130          | 980         | 464          | 4258         | 1345         | 6991         | 2140         | 11386        | 3978          | 31814         | 27941         | 91635                  |            |
|                                               | Race                           |             |              |             |              |              |              |              |              |              |               |               |               |                        |            |
|                                               | White                          | 1074        | 511          | 5594        | 3053         | 21949        | 7926         | 31937        | 12016        | 33564        | 42483         | 118366        | 239233        | 517706                 |            |
|                                               | Black                          | 799         | 560          | 4159        | 1505         | 6427         | 3816         | 14318        | 10375        | 41875        | 7673          | 91506         | 77279         | 260292                 |            |
|                                               | Hispanic                       | 85          | 15           | 58          | 39           | 73           | 52           | 83           | 166          | 22           | 72            | 72            | 36            | 773                    |            |
|                                               | Other                          | 101         | 9            | 23          | 25           | 10           | 37           | 67           | 42           | 27           | 40            | 30            | 379           | 790                    |            |
| <b>Total</b>                                  | <b>2059</b>                    | <b>1095</b> | <b>9834</b>  | <b>4622</b> | <b>28459</b> | <b>11831</b> | <b>46405</b> | <b>22599</b> | <b>75488</b> | <b>50268</b> | <b>209974</b> | <b>316927</b> | <b>779561</b> |                        |            |
| Diabetes, type 2                              | Overall by age                 | 633         |              | 2143        |              | 5435         |              | 9955         |              | 16593        |               | 37803         |               | M: 33968<br>F: 38594   |            |
|                                               | Education                      |             |              |             |              |              |              |              |              |              |               |               |               |                        |            |
|                                               | <High-school                   | 85          | 52           | 269         | 151          | 618          | 446          | 1396         | 1239         | 2625         | 2887          | 5347          | 9328          | 24443                  |            |
|                                               | High-school                    | 245         | 167          | 851         | 549          | 1966         | 1403         | 3145         | 2468         | 4125         | 4288          | 6936          | 10609         | 36752                  |            |
|                                               | College                        | 23          | 15           | 113         | 76           | 422          | 248          | 750          | 339          | 1131         | 554           | 1966          | 1367          | 7004                   |            |
|                                               | Race                           |             |              |             |              |              |              |              |              |              |               |               |               |                        |            |
|                                               | White                          | 130         | 206          | 920         | 251          | 2205         | 561          | 2476         | 434          | 5777         | 1722          | 10526         | 15707         | 40915                  |            |
|                                               | Black                          | 150         | 37           | 397         | 567          | 928          | 1663         | 3171         | 3842         | 2585         | 6469          | 4319          | 6996          | 31124                  |            |
|                                               | Hispanic                       | 100         | 10           | 0           | 5            | 43           | 10           | 0            | 25           | 0            | 39            | 209           | 9             | 450                    |            |
|                                               | Other                          | 0           | 0            | 2           | 1            | 22           | 3            | 7            | 0            | 1            | 0             | 0             | 37            | 73                     |            |
| <b>Total</b>                                  | <b>380</b>                     | <b>253</b>  | <b>1319</b>  | <b>824</b>  | <b>3198</b>  | <b>2237</b>  | <b>5654</b>  | <b>4301</b>  | <b>8363</b>  | <b>8230</b>  | <b>15054</b>  | <b>22749</b>  | <b>72562</b>  |                        |            |

eTable 12. Cardiometabolic deaths in the US in 2002 by population subgroups (continued)

| Disease <sup>a</sup>           | Population Strata <sup>†</sup> | Age         |              |             |              |              |              |              |              |              |               |               |               | Total                  |            |
|--------------------------------|--------------------------------|-------------|--------------|-------------|--------------|--------------|--------------|--------------|--------------|--------------|---------------|---------------|---------------|------------------------|------------|
|                                |                                | 25-34 y     |              | 35-44 y     |              | 45-54 y      |              | 55-64 y      |              | 65-74 y      |               | 75+ y         |               |                        | 25+ y      |
|                                |                                | Males<br>N  | Females<br>N | Males<br>N  | Females<br>N | Males<br>N   | Females<br>N | Males<br>N   | Females<br>N | Males<br>N   | Females<br>N  | Males<br>N    | Females<br>N  |                        | 25+ y<br>N |
| Cardiometabolic disease, total | Overall by age                 | 3787        |              | 16599       |              | 45725        |              | 78959        |              | 142349       |               | 564704        |               | M: 406187<br>F: 445936 |            |
|                                | Education                      |             |              |             |              |              |              |              |              |              |               |               |               |                        |            |
|                                | <High-school                   | 499         | 266          | 2262        | 1042         | 5540         | 2635         | 11697        | 6688         | 23969        | 17421         | 73854         | 118482        | 264355                 |            |
|                                | High-school                    | 1554        | 857          | 7031        | 3532         | 19390        | 8904         | 28868        | 16015        | 41969        | 32948         | 104615        | 170889        | 436572                 |            |
|                                | College                        | 231         | 145          | 1093        | 540          | 4680         | 1593         | 7741         | 2479         | 12517        | 4532          | 33780         | 29308         | 98639                  |            |
|                                | Race                           |             |              |             |              |              |              |              |              |              |               |               |               |                        |            |
|                                | White                          | 1204        | 717          | 6514        | 3304         | 24154        | 8487         | 34413        | 12450        | 39341        | 44205         | 128892        | 254940        | 558621                 |            |
|                                | Black                          | 949         | 597          | 4556        | 2072         | 7355         | 5479         | 17489        | 14217        | 44460        | 14142         | 95825         | 84275         | 291416                 |            |
|                                | Hispanic                       | 185         | 25           | 58          | 44           | 116          | 62           | 83           | 191          | 22           | 111           | 281           | 45            | 1223                   |            |
|                                | Other                          | 101         | 9            | 25          | 26           | 32           | 40           | 74           | 42           | 28           | 40            | 30            | 416           | 863                    |            |
| <b>Total</b>                   | <b>2439</b>                    | <b>1348</b> | <b>11153</b> | <b>5446</b> | <b>31657</b> | <b>14068</b> | <b>52059</b> | <b>26900</b> | <b>83851</b> | <b>58498</b> | <b>225028</b> | <b>339676</b> | <b>852123</b> |                        |            |

<sup>a</sup> Disease-specific deaths in each stratum were obtained from the National Center for Health Statistics (NCHS) ([http://www.cdc.gov/nchs/data\\_access/Vitalstatsonline.htm](http://www.cdc.gov/nchs/data_access/Vitalstatsonline.htm)); uncertainty in the baseline number of deaths is not reported in NCHS. Deaths were excluded if in foreign residents (individuals dying in the US but whose place of residence is outside the US), at age <25 years, with missing age information (0.006%), or, in education-stratified analyses, with missing education information (6.2%). Cardiometabolic diseases (CMD) were defined using the International Classification of Diseases 10th revision (ICD-10). For the present analysis, we obtained data on deaths due to **coronary heart disease (CHD)**: I20-I25; **Ischemic stroke**: I63, I65-I67 (except I67.4), I69.3, G45; **Hemorrhagic stroke**: I60-I62, I69.0-I69.2, I67.4; **Other stroke** (unclassified stroke or sequelae of stroke, not specified as haemorrhage or infarction): I64, I69.4, I69.8; **Diabetes**: E10-E14 (except E10.2, E11.2, E12.2, E13.2); and **other cardiovascular diseases (other CVD)**, including hypertensive heart disease (I11), rheumatic heart disease (I01, I02.0, I05-I09), cardiomyopathy and myocarditis (I42, I40), atrial fibrillation and flutter (I48), aortic aneurysm (I71), peripheral vascular disease (I73, I70.2), endocarditis (I33), and other cardiovascular and circulatory diseases (I00, I02.9, I27-I28 (except I27.1), I30-I32 (except I31.2, I31.3), I34-I39, I47, I70.8, I72, I77-I80, I82-I84, I86-I98). Diabetes deaths are those coded as proximally due to diabetes, and diabetes is also separately a risk factor for CVD deaths along with other risk factors such as smoking, high blood pressure, high cholesterol, obesity, physical inactivity, etc.

<sup>b</sup> Population strata were defined as follows to match the dietary inputs: age (25-34, 35-44, 45-54, 55-64, 65-74, and ≥75 yrs), sex (male and female), education (<high-school: less than high school degree [or those with 3 years of high school or less], high-school: high school degree/equivalent or some college [or those with at most 3 years of college and at least 4 years of high school], and College: ≥4-year college degree), and race/ethnicity (White: non-Hispanic White, Black: non-Hispanic Black, Hispanic: Mexican American/other Hispanic, and Other: other race/mixed race).

**eTable 13. Cardiometabolic death rates associated with suboptimal dietary habits in the US and change between 2002 and 2012.**

| Dietary Factor <sup>a</sup>                  | Cardiometabolic Disease <sup>b</sup> | Associated deaths per 1 million (median, 95% UIs) <sup>c</sup> |                | Change in associated deaths between 2002 and 2012 <sup>d</sup> |                           |
|----------------------------------------------|--------------------------------------|----------------------------------------------------------------|----------------|----------------------------------------------------------------|---------------------------|
|                                              |                                      | 2002                                                           | 2012           | Absolute, per 1 million (median, 95% UIs)                      | Percent (median, 95% UIs) |
| <b>Fruits (&lt;300 g/d)</b>                  | CHD                                  | 181 (140, 221)                                                 | 114 (89, 138)  | -66 (-82, -52)                                                 | -36.9 (-38.3, -35.4)      |
|                                              | Stroke                               | 192 (172, 212)                                                 | 138 (123, 152) | -54 (-61, -48)                                                 | -28.4 (-29.7, -27)        |
|                                              | Ischemic                             | 15 (12, 18)                                                    | 9 (8, 11)      | -6 (-7, -5)                                                    | -38.8 (-40.6, -37)        |
|                                              | Hemorrhagic                          | 63 (53, 72)                                                    | 49 (41, 57)    | -14 (-16, -12)                                                 | -22 (-23.6, -20.4)        |
|                                              | Other                                | 113 (96, 131)                                                  | 79 (65, 92)    | -35 (-40, -29)                                                 | -30.6 (-32.4, -28.6)      |
|                                              | CMD, total                           | 372 (329, 419)                                                 | 252 (223, 281) | -121 (-138, -105)                                              | -32.5 (-33.6, -31.4)      |
| <b>Vegetables (&lt;400 g/d)</b>              | CHD                                  | 185 (147, 226)                                                 | 122 (97, 148)  | -63 (-78, -50)                                                 | -34.2 (-35.3, -33)        |
|                                              | Stroke                               | 189 (158, 214)                                                 | 134 (113, 153) | -55 (-62, -46)                                                 | -28.9 (-30.2, -27.6)      |
|                                              | Ischemic                             | 26 (19, 32)                                                    | 17 (12, 20)    | -9 (-12, -7)                                                   | -36.3 (-37.7, -34.8)      |
|                                              | Hemorrhagic                          | 47 (35, 57)                                                    | 39 (29, 47)    | -8 (-10, -6)                                                   | -17.9 (-20.7, -15.6)      |
|                                              | Other                                | 116 (90, 140)                                                  | 79 (61, 96)    | -37 (-43, -29)                                                 | -31.6 (-33.1, -30.5)      |
|                                              | CMD, total                           | 373 (325, 423)                                                 | 256 (222, 289) | -118 (-134, -101)                                              | -31.5 (-32.5, -30.6)      |
| <b>Nuts/seeds (&lt;20.2 g/d)</b>             | CHD                                  | 468 (401, 543)                                                 | 261 (222, 304) | -207 (-243, -176)                                              | -44.1 (-46.3, -41.9)      |
|                                              | Diabetes                             | 34 (27, 41)                                                    | 23 (18, 27)    | -11 (-14, -9)                                                  | -33.5 (-36.8, -30.3)      |
|                                              | CMD, total                           | 503 (437, 579)                                                 | 284 (245, 328) | -219 (-255, -187)                                              | -43.4 (-45.5, -41.3)      |
| <b>Whole grains (&lt;125 g/d)</b>            | CHD                                  | 125 (90, 163)                                                  | 77 (56, 100)   | -48 (-62, -34)                                                 | -38 (-39.8, -36.1)        |
|                                              | Stroke                               | 97 (82, 109)                                                   | 64 (55, 73)    | -32 (-37, -27)                                                 | -33.5 (-34.5, -32.4)      |
|                                              | Ischemic                             | 13 (9, 17)                                                     | 8 (6, 10)      | -5 (-7, -4)                                                    | -40.5 (-41.8, -38.2)      |
|                                              | Hemorrhagic                          | 25 (20, 30)                                                    | 19 (15, 23)    | -6 (-7, -5)                                                    | -23 (-24.7, -21.2)        |
|                                              | Other                                | 59 (47, 70)                                                    | 37 (30, 44)    | -21 (-26, -17)                                                 | -36.4 (-37.2, -35.7)      |
|                                              | Diabetes                             | 74 (64, 83)                                                    | 56 (48, 63)    | -18 (-21, -15)                                                 | -24.3 (-25.5, -22.9)      |
|                                              | CMD, total                           | 296 (258, 335)                                                 | 198 (173, 222) | -98 (-114, -84)                                                | -33.1 (-34.3, -31.9)      |
| <b>Red meats, unprocessed (&gt;14.3 g/d)</b> | Diabetes                             | 18 (13, 23)                                                    | 14 (10, 18)    | -4 (-6, -3)                                                    | -23.6 (-27.5, -19.1)      |
|                                              | CMD, total                           | 18 (13, 23)                                                    | 14 (10, 18)    | -4 (-6, -3)                                                    | -23.6 (-27.5, -19.1)      |
| <b>Processed meats (&gt;0 g/d)</b>           | CHD                                  | 331 (250, 415)                                                 | 217 (171, 268) | -112 (-145, -83)                                               | -33.8 (-35.8, -31.8)      |
|                                              | Diabetes                             | 69 (59, 81)                                                    | 219 (168, 270) | -13 (-16, -10)                                                 | -18.1 (-20, -16.1)        |
|                                              | CMD, total                           | 401 (324, 486)                                                 | 277 (226, 330) | -125 (-157, -96)                                               | -31.1 (-33.1, -29)        |
| <b>SSBs (&gt;0 g/d)</b>                      | Heart disease <sup>e</sup>           | 348 (305, 394)                                                 | 194 (171, 220) | -154 (-176, -132)                                              | -44.1 (-45.7, -42.7)      |
|                                              | CHD <sup>e</sup>                     | 344 (302, 391)                                                 | 191 (168, 216) | -154 (-176, -132)                                              | -44.5 (-46, -43.1)        |
|                                              | Hypertensive HD <sup>e</sup>         | 3 (2, 4)                                                       | 3 (2, 4)       | 0 (0, 0)                                                       | -1.1 (-6.7, 4.1)          |
|                                              | Stroke <sup>e</sup>                  | 7 (6, 8)                                                       | 4 (4, 5)       | -3 (-3, -2)                                                    | -38.8 (-40.4, -37.4)      |

eTable 13. Cardiometabolic death rates associated with suboptimal dietary habits in the US and change between 2002 and 2012 (continued)

| Dietary Factor <sup>a</sup>                           | Cardiometabolic Disease <sup>b</sup> | Associated deaths<br>per 1 million (median, 95% UIs) <sup>c</sup> |                | Change in associated deaths<br>between 2002 and 2012 <sup>d</sup> |                              |
|-------------------------------------------------------|--------------------------------------|-------------------------------------------------------------------|----------------|-------------------------------------------------------------------|------------------------------|
|                                                       |                                      | 2002                                                              | 2012           | Absolute, per 1 million<br>(median, 95% UIs)                      | Percent<br>(median, 95% UIs) |
|                                                       | Ischemic <sup>e</sup>                | 1 (1, 1)                                                          | 0 (0, 0)       | 0 (0, 0)                                                          | -42.9 (-45.8, -40.3)         |
|                                                       | Hemorrhagic <sup>e</sup>             | 3 (3, 3)                                                          | 2 (2, 2)       | -1 (-1, -1)                                                       | -34.8 (-36.6, -32.8)         |
|                                                       | Other <sup>e</sup>                   | 3 (3, 4)                                                          | 2 (2, 2)       | -1 (-2, -1)                                                       | -41.5 (-43.7, -39.1)         |
|                                                       | Diabetes <sup>e</sup>                | 70 (58, 83)                                                       | 48 (40, 57)    | -22 (-26, -18)                                                    | -31.1 (-33, -28.8)           |
|                                                       | CMD, total <sup>e</sup>              | 425 (379, 475)                                                    | 248 (222, 274) | -178 (-202, -157)                                                 | -41.9 (-43.3, -40.5)         |
| <b>PUFA replacing Carbs<sup>f</sup></b><br>(<11% E/d) | CHD                                  | 142 (117, 167)                                                    | 77 (64, 91)    | -65 (-77, -53)                                                    | -45.8 (-46.7, -45)           |
|                                                       | CMD, total                           | 142 (117, 167)                                                    | 77 (64, 91)    | -65 (-77, -53)                                                    | -45.8 (-46.7, -45)           |
| <b>PUFA replacing SFA<sup>f</sup></b><br>(<11% E/d)   | CHD                                  | 127 (104, 151)                                                    | 69 (56, 82)    | -58 (-69, -47)                                                    | -45.8 (-46.8, -44.8)         |
|                                                       | CMD, total                           | 127 (104, 151)                                                    | 69 (56, 82)    | -58 (-69, -47)                                                    | -45.8 (-46.8, -44.8)         |
| <b>SFA replacing PUFA<sup>f</sup></b><br>(>10% E/d)   | CHD                                  | 25 (20, 32)                                                       | 20 (16, 25)    | -5 (-7, -3)                                                       | -19.7 (-23.7, -15.2)         |
|                                                       | CMD, total                           | 25 (20, 32)                                                       | 20 (16, 25)    | -5 (-7, -3)                                                       | -19.7 (-23.7, -15.2)         |
| <b>Seafood ω-3 fats</b><br>(<250 m/d)                 | CHD                                  | 378 (304, 462)                                                    | 262 (218, 312) | -116 (-150, -83)                                                  | -30.9 (-34.1, -26.3)         |
|                                                       | CMD, total                           | 378 (304, 462)                                                    | 262 (218, 312) | -116 (-150, -83)                                                  | -30.9 (-34.1, -26.3)         |
| <b>Sodium (&gt;2000 mg/d)</b>                         | Heart disease <sup>g</sup>           | 347 (288, 408)                                                    | 252 (214, 291) | -95 (-116, -75)                                                   | -27.3 (-28.8, -25.6)         |
|                                                       | CHD <sup>g</sup>                     | 275 (217, 334)                                                    | 181 (143, 219) | -95 (-116, -74)                                                   | -34.4 (-35.4, -33.4)         |
|                                                       | Hypertensive HD <sup>g</sup>         | 31 (27, 35)                                                       | 36 (32, 40)    | 5 (4, 6)                                                          | 16.3 (14.6, 18.1)            |
|                                                       | Other CVD <sup>g</sup>               | 41 (38, 44)                                                       | 36 (33, 39)    | -5 (-6, -4)                                                       | -12.2 (-14.5, -9.7)          |
|                                                       | Stroke <sup>g</sup>                  | 93 (81, 106)                                                      | 66 (58, 76)    | -27 (-30, -23)                                                    | -28.7 (-29.9, -27.5)         |
|                                                       | Ischemic <sup>g</sup>                | 12 (10, 15)                                                       | 8 (6, 9)       | -4 (-5, -4)                                                       | -36.5 (-37.4, -35.4)         |
|                                                       | Hemorrhagic                          | 23 (19, 27)                                                       | 19 (16, 23)    | -4 (-5, -3)                                                       | -17.1 (-19, -15.5)           |
|                                                       | Other <sup>g</sup>                   | 57 (46, 70)                                                       | 39 (32, 48)    | -18 (-22, -15)                                                    | -31.7 (-33.4, -30.4)         |
|                                                       | CMD, total <sup>g</sup>              | 440 (380, 501)                                                    | 318 (280, 358) | -121 (-143, -100)                                                 | -27.6 (-28.8, -26.2)         |

<sup>a</sup> Dietary factors with probable or convincing evidence, based on criteria for assessing causality,<sup>11,13,14,86</sup> for etiologic relationships with cardiometabolic outcomes including coronary heart disease (CHD), stroke, type 2 diabetes, body mass index (BMI), or systolic blood pressure (SBP).<sup>9,10</sup>

<sup>b</sup> Disease-specific deaths were obtained from the National Center for Health Statistics (NCHS) ([http://www.cdc.gov/nchs/data\\_access/Vitalstatsonline.htm](http://www.cdc.gov/nchs/data_access/Vitalstatsonline.htm)); uncertainty in the baseline number of deaths is not reported in NCHS. Deaths were excluded if in foreign residents (individuals dying in the US but whose place of residence is outside the US), at age<25y, with missing age information (2012: 0.005%; 2002: 0.006%), or, in education-stratified analyses, with missing education information (2012: 2.1%; 2002: 6.2%). For this analysis, we used data on deaths due to diet-related cardiometabolic diseases including **coronary heart disease (CHD)**: I20-I25; **Ischemic stroke**: I63, I65-I67 (except I67.4), I69.3, G45; **Hemorrhagic stroke**: I60-I62, I69.0-I69.2, I67.4; **Other stroke** (unclassified stroke or sequelae of stroke, not specified as haemorrhage or infarction): I64, I69.4, I69.8; **Diabetes**: E10-E14 (except E10.2, E11.2, E12.2, E13.2); and **other cardiovascular diseases (other CVD)** including hypertensive heart disease (HD) (I11), rheumatic heart disease (I01, I02.0, I05-I09), cardiomyopathy and myocarditis (I42, I40), atrial fibrillation and flutter (I48), aortic aneurysm (I71), peripheral vascular disease (I73, I70.2), endocarditis (I33), and other cardiovascular and circulatory diseases (I00, I02.9, I27-I28 (except I27.1), I30-I32 (except I31.2, I31.3), I34-I39, I47, I70.8, I72, I77-I80, I82-I84, I86-I98). Diabetes deaths are those coded as proximally due to diabetes, and diabetes is also separately a risk factor for CVD deaths along with other risk factors such as smoking, high blood pressure, high cholesterol, obesity, physical inactivity, etc.



**eTable 13. Cardiometabolic death rates associated with suboptimal dietary habits in the US and change between 2002 and 2012 (continued)**

<sup>c</sup> We estimated the mortality (absolute, percent, with 95% uncertainty intervals (UIs)) associated with suboptimal suboptimal intakes (reported in parenthesis) of dietary targets reported in this Table among US adults (≥25 years) using a comparative risk assessment framework,<sup>2,91</sup> incorporating the following inputs and their uncertainty on (1) dietary exposure distributions, (2) etiologic relationships of these dietary factors with cardiometabolic mortality, (3) optimal intake distributions, and (4) observed total and disease-specific cardiometabolic deaths (see main Methods and eAppendix 1). Death rates were age-sex standardized to account for changes in population structure (due to population growth and aging) by standardizing the 2002 population to 2012 population.

<sup>d</sup> Absolute changes correspond to  $2012_{estimates} - 2002_{estimates}$ , and percent relative % changes correspond to  $(2012_{estimates} - 2002_{estimates}) / 2002_{estimates} * 100$ .

<sup>e</sup> Available evidence suggests that sugar-sweetened beverages (SSBs) are associated with increased cardiometabolic risk through relationships with body mass index (BMI) and additional BMI-independent relationships with CHD, hypertensive HD, and type 2 diabetes (see eAppendix 1, eTable 5).<sup>5,6</sup> Because of this, in this Table we separate deaths due to hypertensive heart disease (associated with both BMP and BP) from those due to other CVD (associated with BP but not BMI).

<sup>f</sup> Estimated RRs are nearly identical for polyunsaturated fats (PUFA) replacing carbohydrates (Carbs) or saturated fats (SFA). For comparison, in sensitivity analyses we also evaluated the estimated mortality associated with excess SFA in place of PUFA. PUFA in place of carbs is the same as PUFA in place of carbs or SFA.

<sup>g</sup> Available evidence suggests that sodium is associated with increased mortality from CHD, stroke, and other blood pressure (BP)-related cardiovascular diseases through effects on systolic BP.<sup>5,8</sup> For every year above or below age 50, there was 0.105 mm Hg (95% CI: 0.047, 0.164) larger or smaller BP reduction, respectively; we assumed no further increase in effect after age 70 due to limited trial evidence outside this age range. We assumed a log-linear dose-response between SBP and CVD until 115 mm Hg, below which we assumed no further lowering of risk (see eAppendix 1, eTable 5).<sup>8</sup>

**eTable 14. Absolute and proportional cardiometabolic disease mortality associated with suboptimal dietary habits in the US in 2012 by population subgroups.**

| Dietary Factor <sup>a</sup> | Cardiometabolic Disease <sup>b</sup> | Population strata <sup>c</sup> | Associated mortality <sup>d</sup> | Age                |                      |                    |                      |                      |                      |                      |                      |                      |                      |                        |                      | Total (25+ y)<br>(95% UIs)                                                                                                         |  |                      |  |                      |  |                         |  |                      |  |                      |  |                         |  |
|-----------------------------|--------------------------------------|--------------------------------|-----------------------------------|--------------------|----------------------|--------------------|----------------------|----------------------|----------------------|----------------------|----------------------|----------------------|----------------------|------------------------|----------------------|------------------------------------------------------------------------------------------------------------------------------------|--|----------------------|--|----------------------|--|-------------------------|--|----------------------|--|----------------------|--|-------------------------|--|
|                             |                                      |                                |                                   | 25-34 y            |                      | 35-44 y            |                      | 45-54 y              |                      | 55-64 y              |                      | 65-74 y              |                      | 75+ y                  |                      |                                                                                                                                    |  |                      |  |                      |  |                         |  |                      |  |                      |  |                         |  |
|                             |                                      |                                |                                   | Males<br>(95% UIs) | Females<br>(95% UIs) | Males<br>(95% UIs) | Females<br>(95% UIs) | Males<br>(95% UIs)   | Females<br>(95% UIs) | Males<br>(95% UIs)   | Females<br>(95% UIs) | Males<br>(95% UIs)   | Females<br>(95% UIs) | Males<br>(95% UIs)     | Females<br>(95% UIs) |                                                                                                                                    |  |                      |  |                      |  |                         |  |                      |  |                      |  |                         |  |
| <b>Diet*</b>                | <b>Heart disease</b>                 | <b>Overall by age</b>          | <i>N deaths</i>                   | 1363 (1232, 1501)  |                      | 6042 (5545, 6502)  |                      | 20827 (18973, 22251) |                      | 36469 (32796, 39613) |                      | 43257 (39249, 47028) |                      | 110694 (99101, 120286) |                      | <b>M: 128565 (119700, 136563)</b><br><b>F: 94578 (86752, 102364)</b><br><b>M: 47.6 (44.3, 50.5)</b><br><b>F: 40.1 (36.8, 43.4)</b> |  |                      |  |                      |  |                         |  |                      |  |                      |  |                         |  |
|                             |                                      | % CHD                          |                                   | 54 (48.8, 59.5)    |                      | 66.5 (61, 71.5)    |                      | 66.7 (60.7, 71.2)    |                      | 57.5 (51.7, 62.5)    |                      | 52.9 (48, 57.5)      |                      | 34.8 (31.2, 37.8)      |                      |                                                                                                                                    |  |                      |  |                      |  |                         |  |                      |  |                      |  |                         |  |
|                             |                                      | <b>Education</b>               |                                   |                    |                      |                    |                      |                      |                      |                      |                      |                      |                      |                        |                      |                                                                                                                                    |  |                      |  |                      |  |                         |  |                      |  |                      |  |                         |  |
|                             |                                      | <High-school                   | <i>N deaths</i>                   | 239 (212, 261)     |                      | 910 (832, 974)     |                      | 1179 (1040, 1283)    |                      | 2052 (1824, 2282)    |                      | 6103 (5188, 6871)    |                      | 3354 (2880, 3747)      |                      | 13493 (11703, 15266)                                                                                                               |  | 17686 (15227, 19864) |  | 55047 (51910, 58175) |  |                         |  |                      |  |                      |  |                         |  |
|                             |                                      | % CHD                          |                                   | 61.8 (55.6, 68.5)  |                      | 74.8 (67.7, 80.1)  |                      | 70.8 (63.2, 77)      |                      | 68.1 (60.6, 74.3)    |                      | 61 (54.2, 67.8)      |                      | 55.3 (47, 62.2)        |                      | 52.8 (45.3, 58.9)                                                                                                                  |  | 37 (31.8, 41.5)      |  | 46 (43.4, 48.6)      |  |                         |  |                      |  |                      |  |                         |  |
|                             |                                      | High-school                    | <i>N deaths</i>                   | 762 (683, 825)     |                      | 3310 (3029, 3545)  |                      | 11032 (9179, 11202)  |                      | 3527 (3131, 3911)    |                      | 18144 (16134, 20025) |                      | 7352 (6518, 8156)      |                      | 15858 (13726, 17906)                                                                                                               |  | 26666 (22887, 29962) |  | 34527 (29938, 39009) |  | 133928 (127587, 140342) |  |                      |  |                      |  |                         |  |
|                             |                                      | % CHD                          |                                   | 64.9 (58.2, 70.4)  |                      | 75.2 (68.9, 80.6)  |                      | 68.6 (61.1, 74.6)    |                      | 59.4 (52.4, 65.8)    |                      | 63.4 (56.4, 70)      |                      | 59.2 (52.5, 65.6)      |                      | 51.3 (44.4, 57.9)                                                                                                                  |  | 42.5 (37, 48.5)      |  | 32.5 (30.5, 39.9)    |  | 45.4 (42.4, 46.6)       |  |                      |  |                      |  |                         |  |
|                             |                                      | College                        | <i>N deaths</i>                   | 99 (85, 110)       |                      | 498 (448, 541)     |                      | 123 (103, 142)       |                      | 1668 (1451, 1858)    |                      | 426 (358, 490)       |                      | 3992 (3418, 4514)      |                      | 1170 (1015, 1321)                                                                                                                  |  | 3955 (3285, 4554)    |  | 1342 (1090, 1599)    |  | 9006 (7465, 10519)      |  | 4726 (3752, 5753)    |  | 27691 (25853, 29894) |  |                         |  |
|                             |                                      | % CHD                          |                                   | 49.5 (42.7, 55.1)  |                      | 33.9 (28.2, 38.9)  |                      | 67 (60.2, 72.9)      |                      | 40 (33.6, 46.1)      |                      | 63.8 (55.5, 71.1)    |                      | 48.1 (40.5, 55.3)      |                      | 55.8 (47.8, 63.1)                                                                                                                  |  | 48.1 (41.7, 54.3)    |  | 43.7 (36.3, 50.4)    |  | 40.8 (33.2, 48.6)       |  | 30.9 (25.6, 36.1)    |  | 25.5 (20.2, 31)      |  | 37.2 (34.7, 40.1)       |  |
|                             |                                      | <b>Race</b>                    |                                   |                    |                      |                    |                      |                      |                      |                      |                      |                      |                      |                        |                      |                                                                                                                                    |  |                      |  |                      |  |                         |  |                      |  |                      |  |                         |  |
|                             |                                      | White                          | <i>N deaths</i>                   | 619 (539, 688)     |                      | 212 (182, 244)     |                      | 2914 (2638, 3122)    |                      | 1000 (864, 1104)     |                      | 10805 (9723, 11812)  |                      | 3370 (2940, 3738)      |                      | 19073 (16718, 21388)                                                                                                               |  | 6381 (5346, 7200)    |  | 22433 (19793, 25011) |  | 11140 (9745, 12385)     |  | 42373 (35839, 47850) |  | 43935 (37737, 49925) |  | 168954 (159258, 178749) |  |
|                             |                                      | % CHD                          |                                   | 61.8 (53.7, 68.6)  |                      | 50.9 (43.5, 58.4)  |                      | 74.8 (67.7, 80.1)    |                      | 62.7 (54.2, 69.2)    |                      | 68.9 (62, 75.4)      |                      | 60.4 (52.7, 67)        |                      | 58 (50.9, 65.1)                                                                                                                    |  | 50.6 (42.4, 57.1)    |  | 54.6 (48.1, 60.8)    |  | 51.4 (45, 57.1)         |  | 34.7 (29.4, 39.2)    |  | 49.7 (25.5, 33.7)    |  | 41.6 (39.2, 44)         |  |
|                             |                                      | Black                          | <i>N deaths</i>                   | 259 (232, 282)     |                      | 102 (87, 114)      |                      | 1070 (973, 1147)     |                      | 458 (416, 498)       |                      | 2759 (2446, 3024)    |                      | 1437 (1278, 1576)      |                      | 4384 (3838, 4892)                                                                                                                  |  | 2276 (1994, 2539)    |  | 3969 (3544, 4381)    |  | 2645 (2330, 2904)       |  | 3847 (3313, 4384)    |  | 5320 (4330, 6279)    |  | 29040 (27743, 30300)    |  |
|                             |                                      | % CHD                          |                                   | 58 (52, 63.3)      |                      | 44.6 (38.2, 49.9)  |                      | 69.9 (63.5, 74.9)    |                      | 59.8 (54.3, 65)      |                      | 64.8 (57.5, 71)      |                      | 61.4 (54.6, 67.3)      |                      | 58.7 (51.4, 65.5)                                                                                                                  |  | 54 (47.3, 60.3)      |  | 59.6 (53.2, 65.8)    |  | 55.7 (49.1, 61.2)       |  | 39.9 (34.4, 45.5)    |  | 35.9 (29.2, 42.3)    |  | 50.8 (48.6, 53)         |  |
|                             |                                      | Hispanic                       | <i>N deaths</i>                   | 121 (105, 133)     |                      | 27 (24, 31)        |                      | 404 (354, 448)       |                      | 106 (91, 118)        |                      | 1211 (1094, 1309)    |                      | 382 (343, 415)         |                      | 1888 (1681, 2060)                                                                                                                  |  | 735 (656, 811)       |  | 1763 (1536, 1977)    |  | 882 (754, 1011)         |  | 2786 (2241, 3223)    |  | 3013 (2608, 3439)    |  | 13640 (12972, 14328)    |  |
|                             |                                      | % CHD                          |                                   | 55.4 (48.4, 60.8)  |                      | 40.6 (35.1, 46.2)  |                      | 60.6 (53, 67.2)      |                      | 50.8 (43.4, 56.7)    |                      | 71.2 (64.4, 77)      |                      | 65.8 (59, 71.4)        |                      | 65.3 (58.2, 70.3)                                                                                                                  |  | 59.7 (53.3, 65.9)    |  | 56.8 (49.5, 63.7)    |  | 50.1 (42.8, 57.4)       |  | 41.1 (33, 47.5)      |  | 35.8 (31, 40.8)      |  | 49.4 (46.9, 51.9)       |  |
|                             |                                      | Other                          | <i>N deaths</i>                   | 64 (56, 71)        |                      | 11 (9, 13)         |                      | 214 (185, 241)       |                      | 44 (37, 50)          |                      | 604 (499, 668)       |                      | 143 (124, 160)         |                      | 1040 (916, 1152)                                                                                                                   |  | 311 (267, 354)       |  | 1030 (856, 1209)     |  | 452 (343, 581)          |  | 1416 (1111, 1763)    |  | 1532 (1206, 1935)    |  | 7094 (6574, 7795)       |  |
|                             |                                      | % CHD                          |                                   | 61.7 (53.8, 68.1)  |                      | 27.9 (22.7, 33.6)  |                      | 64.6 (55.9, 72.5)    |                      | 47.2 (39.8, 53.4)    |                      | 69.5 (57.4, 76.8)    |                      | 58.8 (50.8, 65.9)      |                      | 69.2 (60.9, 76.6)                                                                                                                  |  | 51 (43.7, 58.1)      |  | 59.9 (49.8, 70.3)    |  | 47.2 (35.9, 60.7)       |  | 36 (28.2, 44.8)      |  | 34.1 (26.9, 43.1)    |  | 47.6 (44.1, 52.3)       |  |
|                             |                                      | <b>Total</b>                   | <i>N deaths</i>                   | 1016 (891, 1137)   |                      | 346 (297, 392)     |                      | 4462 (4015, 4859)    |                      | 1569 (1355, 1774)    |                      | 15479 (13733, 16694) |                      | 5347 (4748, 5893)      |                      | 26089 (22734, 29082)                                                                                                               |  | 10378 (9147, 11465)  |  | 28105 (24672, 31375) |  | 15209 (13442, 16997)    |  | 50228 (42523, 56970) |  | 60461 (52146, 67999) |  | 223960 (211689, 234444) |  |
|                             |                                      | % CHD                          |                                   | 57.3 (50.3, 64.2)  |                      | 46.1 (39.5, 52.1)  |                      | 69.4 (62.5, 75.6)    |                      | 58.9 (50.9, 66.6)    |                      | 68.8 (61, 74.2)      |                      | 61.1 (54.3, 67.4)      |                      | 58.3 (50.8, 65)                                                                                                                    |  | 55.6 (49, 61.4)      |  | 53.4 (46.9, 59.7)    |  | 52.2 (46.1, 58.3)       |  | 35.3 (29.9, 40)      |  | 34.4 (29.7, 38.7)    |  | 44.2 (41.8, 46.3)       |  |
| <b>Diet*</b>                | <b>Coronary heart disease</b>        | <b>Overall by age</b>          | <i>N deaths</i>                   | 897 (841, 945)     |                      | 4482 (4221, 4702)  |                      | 17249 (15926, 18241) |                      | 31826 (28834, 34320) |                      | 38320 (34820, 41515) |                      | 99186 (88809, 107963)  |                      | <b>M: 115001 (107407, 121680)</b><br><b>F: 82599 (75787, 89018)</b><br><b>M: 55.7 (52, 58.9)</b><br><b>F: 50.1 (46, 54)</b>        |  |                      |  |                      |  |                         |  |                      |  |                      |  |                         |  |
|                             |                                      | % CHD                          |                                   | 87.5 (82, 92.2)    |                      | 86.5 (81.5, 90.8)  |                      | 78.7 (72.7, 83.2)    |                      | 66.7 (60.4, 71.9)    |                      | 61 (55.4, 66.1)      |                      | 42.6 (38.2, 46.4)      |                      |                                                                                                                                    |  |                      |  |                      |  |                         |  |                      |  |                      |  |                         |  |
|                             |                                      | <b>Education</b>               |                                   |                    |                      |                    |                      |                      |                      |                      |                      |                      |                      |                        |                      |                                                                                                                                    |  |                      |  |                      |  |                         |  |                      |  |                      |  |                         |  |
|                             |                                      | <High-school                   | <i>N deaths</i>                   | 154 (145, 161)     |                      | 52 (48, 54)        |                      | 669 (626, 700)       |                      | 271 (252, 288)       |                      | 2612 (2380, 2789)    |                      | 974 (880, 1037)        |                      | 4546 (4071, 4910)                                                                                                                  |  | 1746 (1559, 1917)    |  | 5635 (4844, 6278)    |  | 3035 (2642, 3352)       |  | 12305 (10624, 13883) |  | 15869 (13646, 17796) |  | 49426 (46735, 52095)    |  |
|                             |                                      | % CHD                          |                                   | 91.3 (85.9, 95.4)  |                      | 90.8 (84.7, 94.8)  |                      | 91.1 (85.3, 95.3)    |                      | 92.6 (85.9, 98.4)    |                      | 81.8 (74.5, 87.3)    |                      | 82.2 (74.3, 87.5)      |                      | 75.9 (67.9, 81.9)                                                                                                                  |  | 71.8 (64.1, 78.7)    |  | 63.4 (54.5, 70.6)    |  | 63.2 (55, 69.8)         |  | 45 (38.9, 50.8)      |  | 46.1 (39.6, 51.7)    |  | 55.2 (52.2, 58.2)       |  |
|                             |                                      | High-school                    | <i>N deaths</i>                   | 475 (446, 496)     |                      | 153 (142, 161)     |                      | 2372 (2222, 2489)    |                      | 801 (728, 858)       |                      | 8723 (7908, 9343)    |                      | 2838 (2547, 3079)      |                      | 15820 (14131, 17290)                                                                                                               |  | 6153 (5469, 6752)    |  | 14536 (12703, 16260) |  | 7179 (6068, 8109)       |  | 24479 (21032, 27474) |  | 30728 (26551, 34683) |  | 118928 (113377, 124404) |  |
|                             |                                      | % CHD                          |                                   | 92.7 (87, 96.6)    |                      | 89.9 (83.7, 95)    |                      | 90 (84.4, 94.5)      |                      | 88.5 (80.4, 94.8)    |                      | 79.8 (72.4, 85.5)    |                      | 75.9 (68.1, 82.3)      |                      | 71.6 (64, 78.3)                                                                                                                    |  | 70.4 (62.5, 77.2)    |  | 59.2 (51.7, 66.2)    |  | 53 (44.8, 59.8)         |  | 42.3 (36.4, 47.5)    |  | 41.5 (35.8, 46.8)    |  | 54.1 (51.6, 56.6)       |  |
|                             |                                      | College                        | <i>N deaths</i>                   | 60 (53, 65)        |                      | 25 (22, 27)        |                      | 349 (320, 372)       |                      | 91 (81, 100)         |                      | 1402 (1233, 1536)    |                      | 325 (277, 369)         |                      | 3498 (3001, 3921)                                                                                                                  |  | 3190 (2793, 3584)    |  | 3594 (2990, 4113)    |  | 5170 (4553, 5842)       |  | 8216 (6792, 9618)    |  | 4041 (3156, 4976)    |  | 22456 (22786, 26403)    |  |
|                             |                                      | % CHD                          |                                   | 79.6 (70.7, 86.1)  |                      | 76.5 (67.9, 83)    |                      | 83.4 (76.6, 88.9)    |                      | 74.9 (66.4, 82)      |                      | 75.2 (66.2, 82.4)    |                      | 66 (56.2, 74.8)        |                      | 64.1 (55, 71.9)                                                                                                                    |  | 59.9 (51.8, 67.1)    |  | 51.1 (42.5, 58.4)    |  | 52.4 (42.7, 62)         |  | 37.7 (31.2, 44.1)    |  | 32.5 (25.4, 40)      |  | 45.7 (42.5, 49.3)       |  |
|                             |                                      | <b>Race</b>                    |                                   |                    |                      |                    |                      |                      |                      |                      |                      |                      |                      |                        |                      |                                                                                                                                    |  |                      |  |                      |  |                         |  |                      |  |                      |  |                         |  |
|                             |                                      | White                          | <i>N deaths</i>                   | 421 (382, 447)     |                      | 141 (129, 153)     |                      | 2217 (2051, 2325)    |                      | 775 (700, 829)       |                      | 9356 (8495, 10091)   |                      | 2802 (2484, 3051)      |                      | 17235 (15198, 19130)                                                                                                               |  | 5699 (4838, 6340)    |  | 20181 (17786, 22439) |  | 9697 (8532, 10689)      |  | 38791 (32730, 43748) |  | 39870 (34239, 45245) |  | 151871 (143533, 160447) |  |
|                             |                                      | % CHD                          |                                   | 90.3 (81.9, 95.9)  |                      | 87.9 (80.3, 95.2)  |                      | 87.7 (81.2, 92)      |                      | 84.2 (76.1, 90.1)    |                      | 78.4 (71.2, 84.6)    |                      | 66.1 (58.3, 73.4)      |                      | 62.5 (53, 69.9)                                                                                                                    |  | 61.1 (53.8, 67.9)    |  | 61.5 (54.1, 67.7)    |  | 62.5 (55, 69.8)         |  | 45 (38.9, 50.8)      |  | 46.1 (39.6, 51.7)    |  | 50.6 (47.8, 53.4)       |  |
|                             |                                      | Black                          | <i>N deaths</i>                   | 156 (147, 163)     |                      | 63 (58, 66)        |                      | 2063 (1879, 2230)    |                      | 1011 (917, 1084)     |                      | 3269 (2547, 3993)    |                      | 738 (654, 804)         |                      | 15820 (14131, 17290)                                                                                                               |  | 6153 (5469, 6752)    |  | 14536 (12703, 16260) |  | 7179 (6068, 8109)       |  | 24479 (21032, 27474) |  | 30728 (26551, 34683) |  | 118928 (113377, 124404) |  |
|                             |                                      | % CHD                          |                                   | 89.9 (84.3, 93.7)  |                      | 88.5 (81.8, 92.9)  |                      | 90.6 (84.8, 94.3)    |                      | 88.3 (82.2, 92.6)    |                      | 81 (72.9, 86.6)      |                      | 80.9 (73.4, 86.8)      |                      | 70.9 (62.5, 78)                                                                                                                    |  | 69.5 (61.9, 76.4)    |  | 68.7 (61.9, 75.3)    |  | 67.1 (59.3, 73.1)       |  | 47 (40.4, 53.4)      |  | 44.5 (35.9, 52.2)    |  | 62.3 (59.7, 64.9)       |  |
|                             |                                      | Hispanic                       | <i>N deaths</i>                   | 70 (65, 73)        |                      | 17 (16, 18)        |                      | 295 (269, 314)       |                      | 76 (69, 81)          |                      | 1268 (1079, 1444)    |                      | 286 (262, 304)         |                      | 1648 (1479, 1785)                                                                                                                  |  | 626 (561, 680)       |  | 1797 (1534, 1960)    |  | 2543 (2044, 2946)       |  | 2714 (2344, 3092)    |  | 12103 (11531, 12693) |  | 51199 (48993, 53405)    |  |
|                             |                                      | % CHD                          |                                   | 88.9 (82.1, 93)    |                      | 86.4 (80.1, 91.4)  |                      | 84.3 (76.8, 89.8)    |                      | 82.9 (74.9, 88.3)    |                      | 82.6 (75.7, 87.9)    |                      | 81.9 (75, 87.1)        |                      | 73.8 (66.3, 80)                                                                                                                    |  | 71.9 (64.4, 78.1)    |  | 64.8 (57, 72)        |  | 61.4 (53.2, 69.5)       |  | 47 (37.8, 54.4)      |  | 42.7 (36.9, 48.6)    |  | 58.4 (55.6, 61.2)       |  |
|                             |                                      | Other                          | <i>N deaths</i>                   | 38 (34, 41)        |                      | 8 (7, 9)           |                      | 169 (149, 184)       |                      | 35 (31, 38)          |                      | 518 (432, 566)       |                      | 110 (95, 122)          |                      | 906 (803, 994)                                                                                                                     |  | 259 (221, 292)       |  | 897 (740, 1050)      |  | 402 (310, 506)          |  | 1346 (1051, 1710)    |  | 6197 (5735, 6823)    |  | 22456 (22786, 26403)    |  |
|                             |                                      | % CHD                          |                                   | 86.2 (77.9, 92.1)  |                      | 76.7 (67.3, 85.3)  |                      | 80.1 (70.7, 87.4)    |                      | 75.2 (66.6, 81.8)    |                      | 77.3 (64.5, 84.5)    |                      | 72 (62.3, 79.5)        |                      | 76.1 (67.4, 83.4)                                                                                                                  |  | 62.3 (53.2, 70.4)    |  | 64.8 (53.5, 75.9)    |  | 57.8 (44.6, 72.8)       |  | 40.8 (31.4, 51.4)    |  | 40.4 (31.5, 51.3)    |  | 55.1 (51, 60.6)         |  |
|                             |                                      | <b>Total</b>                   | <i>N deaths</i>                   | 672 (619, 716)     |                      | 227 (208, 241)     |                      | 3337 (3090, 3535)    |                      | 1151 (1043, 1244)    |                      | 13020 (11702, 13876) |                      | 4243 (3833, 4584)      |                      | 23044 (20183, 25473)                                                                                                               |  | 8772 (7795, 9616)    |  | 25233 (22185, 28085) |  | 13143 (11613, 14560)    |  | 45802 (38696, 51985) |  | 53355 (45891, 59984) |  | 197981 (187580, 207070) |  |
|                             |                                      | % CHD                          |                                   | 88.1 (81.1, 93.8)  |                      | 86.7 (79.2, 92)    |                      | 86.9 (80.5, 92.1)    |                      | 85.8 (77.8, 92.7)    |                      | 79.5 (71.5, 84.8)    |                      | 76.5 (69.1, 82.6)      |                      | 66.6 (58.3, 73.6)                                                                                                                  |  | 66.9 (59.5, 73.4)    |  | 60.4 (53.1, 67.3)    |  | 62.4 (55.1, 69.1)       |  | 41.9 (35.4, 47.6)    |  | 43.2 (37.2, 48.6)    |  |                         |  |

**eTable 14. Absolute and proportional cardiometabolic disease mortality associated with suboptimal dietary habits in the US in 2012 by population subgroups (continued)**

| Dietary Factor <sup>a</sup> | Cardiometabolic Disease <sup>b</sup> | Population strata <sup>c</sup> | Associated mortality <sup>d</sup> | Age               |                   |                   |                   |                   |                   |                   |                   |                      |                   | Total (25+ y) (95% UIs) |                      |                                                                                                              |
|-----------------------------|--------------------------------------|--------------------------------|-----------------------------------|-------------------|-------------------|-------------------|-------------------|-------------------|-------------------|-------------------|-------------------|----------------------|-------------------|-------------------------|----------------------|--------------------------------------------------------------------------------------------------------------|
|                             |                                      |                                |                                   | 25-34 y           |                   | 35-44 y           |                   | 45-54 y           |                   | 55-64 y           |                   | 65-74 y              |                   |                         | 75+ y                |                                                                                                              |
|                             |                                      |                                |                                   | Males (95% UIs)   | Females (95% UIs) | Males (95% UIs)      | Females (95% UIs) |                         | Males (95% UIs)      | Females (95% UIs)                                                                                            |
|                             |                                      |                                | % other CVD                       | 3.2 (1.6, 4.9)    |                   | 4.9 (3.5, 6.4)    |                   | 9.2 (7.8, 10.7)   |                   | 9.6 (8.5, 10.7)   |                   | 11 (9.7, 12.2)       |                   | 6.5 (5.7, 7.4)          |                      | <b>F: 3797 (3303, 4303)<br/>M: 7.9 (7.2, 8.8)<br/>F: 7.1 (6.2, 8)</b>                                        |
|                             |                                      | <b>Education</b>               |                                   |                   |                   |                   |                   |                   |                   |                   |                   |                      |                   |                         |                      |                                                                                                              |
|                             |                                      | <High-school                   | <i>N deaths</i>                   | 6 (3, 10)         | 0 (0, 0)          | 32 (26, 39)       | 19 (15, 23)       | 23 (12, 35)       | 13 (6, 19)        | 101 (85, 119)     | 62 (51, 74)       | 52 (32, 75)          | 33 (18, 49)       | 434 (358, 506)          | 536 (439, 646)       | 1313 (1174, 1448)                                                                                            |
|                             |                                      |                                | % other CVD                       | 4.2 (2, 6.4)      | 0 (0, 0)          | 12.3 (9.9, 14.9)  | 12.4 (9.9, 15.1)  | 3.9 (2, 5.8)      | 3.8 (1.9, 5.8)    | 10.5 (8.9, 12.4)  | 10.3 (8.5, 12.4)  | 3.3 (2, 4.8)         | 2.8 (1.5, 4.2)    | 6.9 (5.7, 8)            | 5.3 (4.4, 6.4)       | 5.9 (5.3, 6.5)                                                                                               |
|                             |                                      | High-school                    | <i>N deaths</i>                   | 38 (28, 51)       | 0 (0, 0)          | 172 (139, 204)    | 0 (0, 0)          | 149 (108, 189)    | 82 (59, 110)      | 450 (379, 522)    | 284 (236, 337)    | 244 (189, 305)       | 194 (146, 246)    | 817 (676, 978)          | 1368 (1128, 1641)    | 3800 (3501, 4131)                                                                                            |
|                             |                                      |                                | % other CVD                       | 8.1 (5.8, 10.7)   | 0 (0, 0)          | 16.2 (13.1, 19.2) | 0 (0, 0)          | 6.5 (4.8, 8.3)    | 6.2 (4.5, 8.3)    | 12 (10.1, 13.9)   | 11.8 (9.9, 14.1)  | 5.3 (4.1, 6.6)       | 4.8 (3.6, 6)      | 5.8 (4.8, 6.9)          | 5.5 (4.5, 6.5)       | 6.3 (5.8, 6.9)                                                                                               |
|                             |                                      | College                        | <i>N deaths</i>                   | 11 (8, 14)        | 0 (0, 0)          | 35 (28, 43)       | 0 (0, 0)          | 42 (33, 51)       | 21 (17, 27)       | 111 (94, 131)     | 58 (48, 69)       | 52 (42, 64)          | 319 (253, 396)    | 1095 (994, 1212)        | 1095 (994, 1212)     |                                                                                                              |
|                             |                                      |                                | % other CVD                       | 12.2 (9.5, 15.2)  | 0 (0, 0)          | 18.2 (14.6, 21.9) | 0 (0, 0)          | 9.8 (7.8, 11.9)   | 9.1 (7.1, 11.3)   | 10.9 (9.2, 12.8)  | 11 (9.2, 13.1)    | 7.4 (6, 8.9)         | 6.4 (5.2, 7.8)    | 5.4 (4.3, 6.7)          | 6.6 (5.2, 8.2)       | 6.9 (6.2, 7.6)                                                                                               |
|                             |                                      | <b>Race</b>                    |                                   |                   |                   |                   |                   |                   |                   |                   |                   |                      |                   |                         |                      |                                                                                                              |
|                             |                                      | White                          | <i>N deaths</i>                   | 16 (7, 26)        | 0 (0, 0)          | 126 (104, 151)    | 0 (0, 0)          | 181 (145, 224)    | 95 (74, 115)      | 277 (189, 368)    | 72 (38, 111)      | 823 (693, 966)       | 485 (410, 569)    | 1449 (1119, 1804)       | 1234 (999, 1522)     | 4791 (4320, 5250)                                                                                            |
|                             |                                      |                                | % other CVD                       | 4.1 (1.8, 6.5)    | 0 (0, 0)          | 14.9 (12.3, 17.9) | 0 (0, 0)          | 8.4 (6.7, 10.4)   | 8.1 (6.3, 9.9)    | 6.6 (4.5, 8.8)    | 3 (1.6, 4.6)      | 13.3 (11.2, 15.6)    | 10.5 (8.7, 12.1)  | 6.1 (4.7, 7.6)          | 3.5 (2.8, 4.3)       | 5.8 (5.2, 6.4)                                                                                               |
|                             |                                      | Black                          | <i>N deaths</i>                   | 12 (8, 16)        | 0 (0, 0)          | 62 (50, 76)       | 41 (32, 50)       | 84 (67, 102)      | 62 (51, 75)       | 100 (75, 127)     | 45 (32, 59)       | 160 (129, 190)       | 108 (90, 127)     | 123 (99, 150)           | 125 (104, 152)       | 924 (860, 996)                                                                                               |
|                             |                                      |                                | % other CVD                       | 6.7 (4.5, 9.2)    | 0 (0, 0)          | 14.7 (11.8, 18)   | 15.3 (11.9, 18.8) | 10.6 (8.5, 12.9)  | 11.6 (9.4, 13.9)  | 9 (6.7, 11.4)     | 5.4 (3.8, 7)      | 15.2 (12.2, 18)      | 11.6 (9.6, 13.6)  | 8.1 (6.5, 9.9)          | 4.9 (4.1, 6)         | 9 (8.3, 9.7)                                                                                                 |
|                             |                                      | Hispanic                       | <i>N deaths</i>                   | 10 (8, 12)        | 0 (0, 0)          | 8 (4, 12)         | 0 (0, 0)          | 38 (31, 45)       | 20 (16, 25)       | 41 (31, 49)       | 17 (14, 21)       | 28 (19, 37)          | 9 (5, 14)         | 81 (65, 97)             | 95 (77, 115)         | 347 (317, 376)                                                                                               |
|                             |                                      |                                | % other CVD                       | 9.7 (7.6, 12.2)   | 0 (0, 0)          | 3.8 (1.9, 6.1)    | 0 (0, 0)          | 12.8 (10.6, 15.3) | 13.6 (10.9, 16.8) | 10.8 (8.4, 13.1)  | 7.6 (6.1, 9.3)    | 6.4 (4.3, 8.6)       | 2.6 (1.3, 4)      | 8.2 (6.6, 9.9)          | 6.6 (5.3, 8)         | 7.4 (6.8, 8.1)                                                                                               |
|                             |                                      | Other                          | <i>N deaths</i>                   | 9 (7, 11)         | 0 (0, 0)          | 7 (4, 10)         | 0 (0, 0)          | 22 (18, 26)       | 12 (10, 15)       | 32 (27, 39)       | 19 (16, 23)       | 46 (33, 60)          | 17 (16, 17)       | 71 (52, 81)             | 295 (268, 323)       |                                                                                                              |
|                             |                                      |                                | % other CVD                       | 20.1 (16, 24.5)   | 0 (0, 0)          | 9.6 (5.9, 13.9)   | 0 (0, 0)          | 17.7 (14.4, 21)   | 18.2 (14.7, 22.1) | 17.5 (14.5, 20.9) | 13.2 (10.9, 15.5) | 20.4 (14.7, 27)      | 5.1 (3.5, 6.7)    | 10.6 (8.4, 13.2)        | 8.6 (6.7, 10.9)      | 5.1 (4.2, 6.1)                                                                                               |
|                             |                                      | <b>Total</b>                   | <i>N deaths</i>                   | 36 (18, 55)       | 0 (0, 0)          | 117 (84, 154)     | 0 (0, 0)          | 309 (247, 374)    | 155 (139, 211)    | 552 (465, 636)    | 356 (293, 419)    | 666 (568, 772)       | 2588 (2116, 3093) | 7449 (6858, 8109)       | 7449 (6858, 8109)    |                                                                                                              |
|                             |                                      |                                | % other CVD                       | 5 (2.5, 7.7)      | 0 (0, 0)          | 7.6 (5.5, 10)     | 0 (0, 0)          | 9.2 (7.3, 11.1)   | 9.1 (7.3, 11)     | 9.4 (7.9, 10.8)   | 9.9 (8.2, 11.7)   | 11.2 (9.4, 13)       | 10.8 (9.2, 12.5)  | 6.6 (5.4, 7.8)          | 6.4 (5.2, 7.6)       | 7.5 (6.9, 8.1)                                                                                               |
| <b>Diet<sup>e</sup></b>     | <b>Stroke, total</b>                 | <b>Overall by age</b>          | <i>N deaths</i>                   | 454 (416, 480)    |                   | 1453 (1332, 1543) |                   | 4404 (4044, 4692) |                   | 7933 (7286, 8498) |                   | 11682 (10739, 12532) |                   | 38833 (34761, 42142)    |                      | <b>M: 29274 (27333, 31071)<br/>F: 37234 (33727, 40060)<br/>M: 55.8 (52.1, 59.2)<br/>F: 49.1 (44.5, 52.8)</b> |
|                             |                                      |                                | % TSTK                            | 84.8 (77.8, 89.8) |                   | 84 (77, 89.2)     |                   | 77.9 (71.5, 83)   |                   | 71.6 (65.8, 76.7) |                   | 64.3 (59.1, 68.9)    |                   | 42.6 (38.1, 46.2)       |                      |                                                                                                              |
|                             |                                      | <b>Education</b>               |                                   |                   |                   |                   |                   |                   |                   |                   |                   |                      |                   |                         |                      |                                                                                                              |
|                             |                                      | <High-school                   | <i>N deaths</i>                   | 55 (48, 58)       | 39 (33, 42)       | 196 (178, 207)    | 139 (125, 147)    | 606 (536, 654)    | 389 (340, 420)    | 1003 (892, 1077)  | 639 (564, 695)    | 1435 (1259, 1610)    | 1176 (1006, 1306) | 3766 (3250, 4212)       | 6800 (5916, 7624)    | 16651 (15612, 17553)                                                                                         |
|                             |                                      |                                | % TSTK                            | 88.2 (77.1, 94.1) | 86.5 (74.1, 92.6) | 88.8 (80.6, 93.8) | 88.8 (79.7, 93.6) | 81.2 (71.9, 87.7) | 79.6 (69.7, 86)   | 76.3 (67.9, 81.9) | 73.3 (64.7, 79.7) | 64.9 (56.9, 72.8)    | 60.7 (51.9, 67.4) | 45.7 (39.5, 51.1)       | 44 (38.3, 49.3)      | 52.4 (49.2, 55.3)                                                                                            |
|                             |                                      | High-school                    | <i>N deaths</i>                   | 178 (159, 188)    | 130 (114, 138)    | 553 (507, 577)    | 399 (338, 430)    | 1537 (1345, 1667) | 1352 (1174, 1465) | 3006 (2659, 3244) | 2279 (2005, 2462) | 3419 (2934, 3818)    | 3167 (2698, 3564) | 7039 (6097, 7971)       | 14436 (12430, 16209) | 38761 (36644, 40808)                                                                                         |
|                             |                                      |                                | % TSTK                            | 88.4 (78.9, 93.4) | 85.2 (74.9, 91.1) | 90.2 (82.7, 94.1) | 84.2 (71.3, 90.8) | 79.1 (69.2, 85.8) | 78.3 (68, 84.8)   | 76 (67.2, 82)     | 74.1 (65.2, 80)   | 63.2 (54.3, 70.6)    | 58.6 (50, 66)     | 43.1 (37.3, 48.8)       | 40.5 (34.9, 45.5)    | 51.7 (48.9, 54.5)                                                                                            |
|                             |                                      | College                        | <i>N deaths</i>                   | 28 (25, 29)       | 27 (24, 30)       | 96 (85, 102)      | 96 (82, 107)      | 242 (208, 267)    | 212 (182, 234)    | 642 (559, 701)    | 427 (368, 472)    | 991 (862, 1120)      | 2787 (2371, 3186) | 2868 (2416, 3093)       | 9199 (8621, 9751)    |                                                                                                              |
|                             |                                      |                                | % TSTK                            | 86.3 (77, 91.7)   | 76.3 (66.9, 82.9) | 85.6 (76.1, 91.1) | 76.3 (64.8, 84.9) | 72.9 (62.6, 80.4) | 72.4 (62.1, 79.8) | 68.7 (59.8, 74.9) | 66.9 (57.7, 73.9) | 57.6 (49, 65)        | 54.5 (46.1, 62)   | 40.3 (34.3, 46)         | 47.7 (44.7, 50.6)    |                                                                                                              |
|                             |                                      | <b>Race</b>                    |                                   |                   |                   |                   |                   |                   |                   |                   |                   |                      |                   |                         |                      |                                                                                                              |
|                             |                                      | White                          | <i>N deaths</i>                   | 130 (114, 138)    | 107 (92, 115)     | 402 (367, 423)    | 329 (288, 356)    | 1279 (1126, 1391) | 1083 (940, 1182)  | 2829 (2474, 3096) | 1879 (1597, 2114) | 4609 (4107, 5040)    | 3797 (3305, 4217) | 11379 (9873, 12804)     | 19876 (16977, 22563) | 48850 (45774, 51704)                                                                                         |
|                             |                                      |                                | % TSTK                            | 86.5 (76, 92)     | 83.6 (72.2, 89.9) | 88.4 (80.6, 93)   | 83.4 (71.5, 88.2) | 78.9 (69.5, 85.8) | 77.3 (67.1, 84.3) | 71 (62.1, 77.7)   | 65.6 (55.8, 73.8) | 66.7 (59.4, 72.9)    | 61.9 (53.9, 68.8) | 42.8 (37.1, 48.1)       | 40.2 (34.3, 45.6)    | 48.8 (45.7, 51.6)                                                                                            |
|                             |                                      | Black                          | <i>N deaths</i>                   | 63 (58, 66)       | 44 (39, 47)       | 231 (211, 241)    | 189 (171, 198)    | 736 (657, 789)    | 625 (555, 672)    | 1150 (1012, 1247) | 831 (714, 921)    | 1147 (1026, 1243)    | 966 (857, 1059)   | 14436 (12430, 16209)    | 19876 (16977, 22563) | 48850 (45774, 51704)                                                                                         |
|                             |                                      |                                | % TSTK                            | 90.2 (82.3, 94.5) | 85.9 (76.1, 91.7) | 90.6 (82.7, 94.6) | 90.2 (81.8, 94.7) | 82.7 (73.8, 88.6) | 82.6 (73.4, 88.7) | 75.5 (66.5, 82)   | 71.1 (61.1, 78.8) | 71.8 (64.2, 77.8)    | 67.1 (59.6, 73.7) | 48.1 (41.8, 53.3)       | 42.8 (37, 48)        | 62.5 (60, 64.8)                                                                                              |
|                             |                                      | Hispanic                       | <i>N deaths</i>                   | 51 (44, 54)       | 33 (29, 36)       | 161 (139, 173)    | 79 (66, 86)       | 326 (289, 351)    | 212 (185, 228)    | 427 (377, 468)    | 261 (229, 288)    | 407 (368, 442)       | 341 (286, 388)    | 1148 (984, 1302)        | 4379 (4158, 4574)    |                                                                                                              |
|                             |                                      |                                | % TSTK                            | 86.5 (74.8, 92.2) | 84.8 (73.7, 91)   | 84.1 (73, 90.4)   | 81.2 (68.3, 88.8) | 81.4 (72.3, 87.9) | 82.2 (71.6, 88.5) | 73.4 (64.8, 80.4) | 69.7 (61.1, 77)   | 64.1 (56.5, 71.3)    | 56 (46.9, 63.6)   | 45.3 (39.5, 51.8)       | 42.3 (36.2, 48)      | 57 (54.2, 59.6)                                                                                              |
|                             |                                      | Other                          | <i>N deaths</i>                   | 16 (15, 17)       | 15 (12, 17)       | 50 (43, 55)       | 45 (36, 51)       | 153 (137, 165)    | 110 (95, 120)     | 248 (221, 273)    | 166 (142, 187)    | 336 (297, 375)       | 240 (200, 278)    | 562 (480, 647)          | 611 (473, 763)       | 2669 (2501, 2837)                                                                                            |
|                             |                                      |                                | % TSTK                            | 91.2 (82.1, 96.1) | 76.5 (62.5, 85.7) | 81.9 (71.2, 89.5) | 76.8 (61.4, 85.6) | 80.2 (71.6, 86.5) | 79.4 (68.4, 86.5) | 76.3 (68.1, 83.9) | 65.7 (55.9, 74)   | 72.9 (64.4, 81.4)    | 60.4 (50.4, 69.9) | 48.1 (41, 55.3)         | 34 (26.3, 42.5)      | 54.6 (51, 58)                                                                                                |
|                             |                                      | <b>Total</b>                   | <i>N deaths</i>                   | 257 (225, 274)    | 198 (172, 213)    | 828 (725, 883)    | 630 (547, 682)    | 2416 (2119, 2622) | 1998 (1720, 2163) | 4670 (4078, 5092) | 3292 (2917, 3610) | 6323 (5514, 6925)    | 5405 (4712, 5933) | 13887 (12075, 15638)    | 24906 (21378, 27690) | 66547 (62799, 69915)                                                                                         |
|                             |                                      |                                | % TSTK                            | 86.4 (75.8, 92.4) | 83.2 (72.5, 89.7) | 86.1 (75.4, 91.8) | 82 (71.2, 88.8)   | 77.9 (68.3, 84.6) | 78.2 (67.3, 84.6) | 72.8 (63.6, 79.4) | 70.6 (62.6, 77.5) | 65.8 (57.4, 72.1)    | 63 (54.9, 69.2)   | 43.3 (37.6, 48.8)       | 42.2 (36.2, 46.9)    | 51.9 (48.9, 54.5)                                                                                            |
| <b>Diet<sup>e</sup></b>     | <b>Ischemic Stroke</b>               | <b>Overall by age</b>          | <i>N deaths</i>                   | 49 (43, 54)       |                   | 130 (114, 143)    |                   | 406 (354, 448)    |                   | 761 (650, 846)    |                   | 1181 (1018, 1325)    |                   | 4501 (3728, 5122)       |                      | <b>M: 3078 (2705, 3401)<br/>F: 4079 (3441, 4616)<br/>M: 48 (42.2, 53)<br/>F: 42 (35.4, 47.5)</b>             |
|                             |                                      |                                | % ISTK                            | 75.5 (66.4, 82.3) |                   | 74.2 (64.9, 81.4) |                   | 69 (60.1, 76)     |                   | 63.5 (54.2, 70.5) |                   | 57 (49.2, 64)        |                   | 37.4 (31, 42.6)         |                      |                                                                                                              |
|                             |                                      | <b>Education</b>               |                                   |                   |                   |                   |                   |                   |                   |                   |                   |                      |                   |                         |                      |                                                                                                              |
|                             |                                      | <High-school                   | <i>N deaths</i>                   | 3 (3, 4)          | 4 (3, 4)          | 16 (14, 18)       | 6 (5, 7)          | 50 (40, 56)       | 33 (26, 38)       | 108 (89, 122)     | 72 (57, 82)       | 156 (115, 187)       | 133 (99, 160)     | 436 (348, 520)          | 828 (639, 997)       | 1872 (1674, 2053)                                                                                            |
|                             |                                      |                                | % ISTK                            | 79 (64.4, 88)     | 76.3 (60.2, 86)   | 80.5 (68.8, 87.5) | 80.6 (68.6, 88.3) | 71.9 (58.2, 80.9) | 69.5 (54.8, 80)   | 68.9 (57, 77.9)   | 65.1 (51.5, 74.7) | 57.1 (42.1, 68.4)    | 52.5 (39.3, 63.1) | 39.5 (31.5, 47.1)       | 38.8 (30, 46.7)      | 44.7 (40, 49.1)                                                                                              |
|                             |                                      | High-school                    | <i>N deaths</i>                   | 19 (16, 20)       | 13 (10, 15)       | 54 (47, 59)       | 35 (29, 40)       | 163 (129, 186)    | 106 (84, 121)     | 303 (247, 343)    | 183 (150, 210)    | 320 (245, 378)       | 303 (223, 365)    | 768 (576, 937)          | 1709 (1328, 2070)    | 4066 (3661, 4439)                                                                                            |
|                             |                                      |                                | % ISTK                            | 80.6 (67.6, 88.9) | 75.6 (61.5, 85.6) | 83.3 (72.5, 90)   | 75.8 (59.8, 83.2) | 65 (54.5, 80.5)   | 68.5 (54.5, 78.1) | 67.9 (55.4, 76.9) | 65 (53.4, 74.8)   | 54.2 (41.4, 61.4)    | 50.7 (37, 60.7)   | 37.6 (28.2, 45.9)       | 37.9 (29.1, 46.1)    | 43.9 (39.5, 47.9)                                                                                            |
|                             |                                      | College                        | <i>N deaths</i>                   | 3 (3, 3)          | 8 (6, 9)          | 6 (5, 7)          | 13 (10, 16)       | 25 (20, 29)       | 17 (14, 20)       | 69 (55, 80)       | 35 (28, 41)       | 99 (76, 119)         | 44 (34, 54)       | 315 (240, 376)          | 339 (258, 418)       | 983 (874, 1090)                                                                                              |
|                             |                                      |                                | % ISTK                            | 78.1 (65.9, 85.8) | 69.8 (52.4, 79.6) | 77.1 (66.7, 84.9) | 66.8 (51.2, 77.6) | 63.9 (51.6, 74.4) | 61.5 (49, 71.3)   | 62 (49, 71.2)     | 58.5 (45.9, 68.6) | 50 (39, 60.6)        | 47.2 (35.7, 57)   | 35.9 (27.3, 42.8)       | 35.9 (27.3, 42.8)    | 41.1 (36.5, 45.5)                                                                                            |
|                             |                                      | <b>Race</b>                    |                                   |                   |                   |                   |                   |                   |                   |                   |                   |                      |                   |                         |                      |                                                                                                              |

**eTable 14. Absolute and proportional cardiometabolic disease mortality associated with suboptimal dietary habits in the US in 2012 by population subgroups (continued)**

| Dietary Factor <sup>a</sup> | Cardiometabolic Disease <sup>b</sup> | Population strata <sup>c</sup> | Associated mortality <sup>d</sup> | Age                |                   |                   |                    |                   |                   |                   |                   |                   |                   |                      |                      |                                                                  |  | Total (25+ y)<br>(95% UIs) |
|-----------------------------|--------------------------------------|--------------------------------|-----------------------------------|--------------------|-------------------|-------------------|--------------------|-------------------|-------------------|-------------------|-------------------|-------------------|-------------------|----------------------|----------------------|------------------------------------------------------------------|--|----------------------------|
|                             |                                      |                                |                                   | 25-34 y            |                   | 35-44 y           |                    | 45-54 y           |                   | 55-64 y           |                   | 65-74 y           |                   | 75+ y                |                      |                                                                  |  |                            |
|                             |                                      |                                |                                   | Males              | Females           | Males             | Females            | Males             | Females           | Males             | Females           | Males             | Females           | Males                | Females              |                                                                  |  |                            |
|                             |                                      |                                |                                   | (95% UIs)          | (95% UIs)         | (95% UIs)         | (95% UIs)          | (95% UIs)         | (95% UIs)         | (95% UIs)         | (95% UIs)         | (95% UIs)         | (95% UIs)         | (95% UIs)            | (95% UIs)            |                                                                  |  |                            |
|                             |                                      | <High-school                   | <i>N deaths</i>                   | 42 (35, 45)        | 30 (24, 32)       | 144 (126, 153)    | 94 (81, 100)       | 347 (272, 381)    | 222 (178, 244)    | 391 (324, 435)    | 261 (212, 296)    | 385 (285, 446)    | 342 (255, 405)    | 733 (561, 884)       | 1201 (915, 1440)     | 4316 (3997, 4603)                                                |  |                            |
|                             |                                      |                                | <i>% HSTK</i>                     | 89 (74.4, 95.7)    | 88.4 (71.8, 95.2) | 90 (78.7, 95.9)   | 89.9 (76.8, 95.5)  | 83.5 (65.8, 90.5) | 82.2 (65.8, 87.8) | 78.9 (65.2, 87.8) | 75.7 (61.4, 85.7) | 69.8 (51.7, 81)   | 69.8 (48.2, 76.6) | 49.9 (38.2, 60.2)    | 48.8 (37.2, 58.5)    | 62.7 (58.1, 66.9)                                                |  |                            |
|                             |                                      | High-school                    | <i>N deaths</i>                   | 132 (113, 140)     | 91 (75, 99)       | 351 (306, 371)    | 275 (215, 302)     | 872 (692, 970)    | 867 (701, 961)    | 1274 (1034, 1415) | 1074 (862, 1202)  | 1121 (845, 1308)  | 1150 (835, 1366)  | 1691 (1256, 2059)    | 2821 (2121, 3408)    | 12073 (11236, 12884)                                             |  |                            |
|                             |                                      |                                | <i>% HSTK</i>                     | 90 (77, 95.5)      | 86.9 (71.5, 93.9) | 91.5 (79.8, 96.5) | 85.8 (67.1, 94)    | 81.4 (64.6, 90.5) | 79.9 (64.6, 88.6) | 78.5 (60.8, 87.2) | 75.8 (60.9, 84.9) | 67.3 (50.8, 78.6) | 61.7 (44.8, 73.6) | 46.9 (34.8, 57.1)    | 43.9 (33, 53.1)      | 61.3 (57, 65.4)                                                  |  |                            |
|                             |                                      | College                        | <i>N deaths</i>                   | 20 (17, 22)        | 15 (12, 16)       | 73 (63, 79)       | 67 (52, 76)        | 146 (113, 167)    | 148 (117, 168)    | 289 (232, 328)    | 232 (182, 266)    | 384 (291, 462)    | 251 (186, 307)    | 703 (520, 876)       | 596 (439, 745)       | 2989 (2714, 3222)                                                |  |                            |
|                             |                                      |                                | <i>% HSTK</i>                     | 87.8 (75.1, 94.5)  | 80.6 (64.8, 90.7) | 86.5 (73.7, 93.2) | 79 (60.9, 89.6)    | 75 (58.1, 85.5)   | 74.2 (58.8, 84.3) | 71.2 (57.2, 80.9) | 68.7 (53.8, 78.7) | 60.2 (45.6, 72.4) | 56.1 (41.6, 68.4) | 43 (31.9, 53.7)      | 44.2 (32.5, 55.2)    | 55.2 (50.1, 59.5)                                                |  |                            |
|                             |                                      | <b>Race</b>                    |                                   |                    |                   |                   |                    |                   |                   |                   |                   |                   |                   |                      |                      |                                                                  |  |                            |
|                             |                                      | White                          | <i>N deaths</i>                   | 96 (81, 103)       | 73 (60, 80)       | 259 (224, 276)    | 218 (178, 240)     | 698 (561, 778)    | 663 (541, 742)    | 1164 (892, 1327)  | 897 (678, 1065)   | 1526 (1213, 1720) | 1339 (1002, 1572) | 2622 (1981, 3174)    | 3780 (2712, 4646)    | 13695 (12543, 14674)                                             |  |                            |
|                             |                                      |                                | <i>% HSTK</i>                     | 88.3 (74, 94.5)    | 86.1 (71, 93.7)   | 90 (77.9, 95.7)   | 83.9 (68.5, 92.3)  | 79.4 (64.8, 88.8) | 74.2 (56.8, 84.6) | 70.9 (51.4, 80.7) | 67.9 (51.4, 80.7) | 64.2 (48.1, 75.5) | 54.9 (34.7, 55.5) | 44 (31.6, 54.1)      | 57.3 (52.5, 61.4)    |                                                                  |  |                            |
|                             |                                      | Black                          | <i>N deaths</i>                   | 41 (36, 44)        | 29 (25, 31)       | 148 (128, 155)    | 123 (105, 130)     | 413 (339, 449)    | 392 (323, 427)    | 452 (364, 508)    | 354 (266, 406)    | 267 (217, 299)    | 281 (225, 322)    | 226 (170, 265)       | 385 (282, 469)       | 3190 (2996, 3354)                                                |  |                            |
|                             |                                      |                                | <i>% HSTK</i>                     | 91.9 (80.5, 97)    | 88.3 (74.4, 95.3) | 91.6 (79.6, 96.4) | 91.5 (77.9, 96.6)  | 84.9 (69.6, 92.3) | 84.3 (69.4, 91.8) | 78.1 (62.9, 87.7) | 73.3 (55.1, 84.1) | 75.3 (61.2, 84.6) | 70.7 (56.6, 81)   | 53.2 (40.1, 62.4)    | 47.2 (34.6, 57.6)    | 72.9 (68.4, 76.6)                                                |  |                            |
|                             |                                      | Hispanic                       | <i>N deaths</i>                   | 41 (35, 44)        | 24 (20, 26)       | 120 (99, 130)     | 62 (50, 68)        | 220 (187, 242)    | 149 (123, 162)    | 221 (177, 251)    | 130 (103, 149)    | 134 (103, 156)    | 145 (103, 177)    | 178 (137, 217)       | 257 (191, 312)       | 1731 (1621, 1827)                                                |  |                            |
|                             |                                      |                                | <i>% HSTK</i>                     | 87.7 (73.8, 94.3)  | 86.4 (72.1, 93.9) | 85.5 (70.4, 93)   | 82.5 (66.6, 91.2)  | 83.9 (70.3, 91.1) | 83.3 (68.5, 90.8) | 75.3 (60.3, 85.6) | 71.7 (56.6, 82)   | 67.6 (51.9, 78.6) | 58.9 (41.8, 72)   | 48.6 (37.2, 59)      | 46.7 (34.5, 56.5)    | 67.3 (63, 71)                                                    |  |                            |
|                             |                                      | Other                          | <i>N deaths</i>                   | 16 (14, 16)        | 12 (9, 13)        | 38 (32, 42)       | 37 (28, 42)        | 91 (76, 100)      | 79 (64, 89)       | 126 (102, 143)    | 99 (76, 117)      | 133 (105, 153)    | 101 (75, 123)     | 158 (117, 192)       | 162 (109, 221)       | 1094 (1014, 1165)                                                |  |                            |
|                             |                                      |                                | <i>% HSTK</i>                     | 91.3 (81.6, 96.3)  | 78.8 (60.7, 89.8) | 83.7 (69.6, 92.3) | 78.8 (60.4, 88.9)  | 81.9 (68.8, 90.2) | 80.2 (65.1, 89.4) | 77.7 (62.9, 88.2) | 67.1 (51.7, 79.1) | 74.6 (59.1, 86)   | 68.6 (46.3, 76.5) | 50.4 (37.4, 61.2)    | 35.6 (23.9, 48.4)    | 62.4 (57.8, 66.4)                                                |  |                            |
|                             |                                      | <b>Total</b>                   | <i>N deaths</i>                   | 192 (160, 206)     | 138 (113, 151)    | 557 (459, 599)    | 434 (352, 478)     | 1380 (1123, 1533) | 1265 (1002, 1396) | 1962 (1525, 2218) | 1559 (1227, 1772) | 2007 (1470, 2326) | 1891 (1470, 2187) | 4795 (3605, 5843)    | 9863 (8301, 21265)   | 19863 (18301, 21265)                                             |  |                            |
|                             |                                      |                                | <i>% HSTK</i>                     | 87.9 (73.3, 94.7)  | 85.7 (70.1, 93.6) | 87.8 (72.3, 94.4) | 84 (68, 92.5)      | 80 (65.1, 88.8)   | 80.1 (63.5, 88.5) | 75.4 (58.6, 85.2) | 73.1 (57.5, 83.1) | 69.1 (54.2, 80)   | 65.5 (50.9, 75.7) | 47 (35.2, 56.3)      | 46.1 (34.6, 56.1)    | 60.9 (56.2, 65.2)                                                |  |                            |
| <b>Diet<sup>a</sup></b>     | <b>Other Stroke</b>                  | <b>Overall by age</b>          | <i>N deaths</i>                   | 77 (69, 82)        |                   | 341 (300, 364)    |                    | 1379 (1222, 1497) |                   | 3696 (3252, 4044) |                   | 6666 (5877, 7308) |                   | 26325 (22868, 29415) |                      | <b>M: 16570 (14882, 18245)</b><br><b>F: 22653 (19470, 25498)</b> |  |                            |
|                             |                                      |                                | <i>% OSTK</i>                     | 85 (76.4, 90.5)    |                   | 84.5 (74.5, 90.4) |                    | 78.2 (69.3, 84.9) |                   | 71.9 (63.3, 78.7) |                   | 64.6 (57, 70.8)   |                   | 42.6 (37, 47.5)      |                      | <b>M: 53.2 (47.8, 58.6)</b><br><b>F: 46.8 (40.2, 52.6)</b>       |  |                            |
|                             |                                      | <b>Education</b>               |                                   |                    |                   |                   |                    |                   |                   |                   |                   |                   |                   |                      |                      |                                                                  |  |                            |
|                             |                                      | <High-school                   | <i>N deaths</i>                   | 10 (8, 10)         | 5 (4, 6)          | 37 (33, 39)       | 39 (34, 42)        | 214 (182, 236)    | 136 (113, 151)    | 507 (429, 562)    | 307 (256, 345)    | 902 (729, 1037)   | 704 (552, 820)    | 2606 (2125, 2986)    | 4781 (3929, 5514)    | 10425 (9492, 11247)                                              |  |                            |
|                             |                                      |                                | <i>% OSTK</i>                     | 88.8 (74, 94.9)    | 87.3 (72, 93.8)   | 89.2 (79.8, 94.9) | 88.7 (76.6, 94.8)  | 81.7 (69.5, 89.9) | 80.1 (66.2, 88.7) | 76.6 (64.8, 84.8) | 73.7 (61.5, 82.6) | 65 (52.5, 74.8)   | 61 (47.8, 71)     | 46 (37.5, 52.7)      | 44 (36.1, 50.7)      | 50.4 (45.9, 54.4)                                                |  |                            |
|                             |                                      | High-school                    | <i>N deaths</i>                   | 28 (24, 29)        | 26 (22, 28)       | 149 (133, 157)    | 89 (74, 97)        | 513 (421, 565)    | 383 (319, 424)    | 1435 (1209, 1598) | 1027 (856, 1147)  | 1999 (1577, 2305) | 1739 (1378, 2037) | 4602 (3784, 5395)    | 9927 (8110, 11480)   | 22409 (20456, 24181)                                             |  |                            |
|                             |                                      |                                | <i>% OSTK</i>                     | 88.9 (78.4, 94.6)  | 86.1 (72.5, 92.9) | 90.6 (81.4, 95.6) | 84.9 (70.5, 92.3)  | 80 (65.6, 88.1)   | 78.6 (65.5, 87)   | 76 (64.1, 84.7)   | 74.4 (62.1, 83.1) | 63.4 (50, 73.1)   | 59.3 (47, 69.4)   | 43 (35.4, 50.5)      | 40.6 (33.2, 47)      | 48.8 (44.5, 52.7)                                                |  |                            |
|                             |                                      | College                        | <i>N deaths</i>                   | 4 (4, 5)           | 5 (4, 6)          | 16 (14, 18)       | 5 (4, 6)           | 48 (39, 55)       | 48 (39, 55)       | 286 (234, 325)    | 161 (129, 185)    | 513 (402, 601)    | 529 (373, 356)    | 1792 (1406, 2126)    | 5109 (4707, 5694)    | 5209 (4752, 5694)                                                |  |                            |
|                             |                                      |                                | <i>% OSTK</i>                     | 86.9 (75.8, 93.7)  | 76.8 (63.9, 84.9) | 86 (72.8, 92.9)   | 77.3 (62.8, 87)    | 73.8 (58.9, 83)   | 72.5 (59.5, 82.8) | 68.7 (56.1, 77.9) | 67.1 (53.6, 77.1) | 57.8 (45.4, 67.8) | 54.6 (43.2, 65)   | 40.6 (31.9, 48.2)    | 40.9 (33.2, 48.3)    | 45.5 (41.1, 49.7)                                                |  |                            |
|                             |                                      | <b>Race</b>                    |                                   |                    |                   |                   |                    |                   |                   |                   |                   |                   |                   |                      |                      |                                                                  |  |                            |
|                             |                                      | White                          | <i>N deaths</i>                   | 20 (17, 21)        | 21 (17, 23)       | 99 (86, 104)      | 74 (64, 86)        | 448 (364, 499)    | 318 (259, 354)    | 1359 (1126, 1533) | 829 (637, 972)    | 2626 (2195, 2955) | 2100 (1696, 2398) | 7489 (6151, 8776)    | 13861 (11169, 16123) | 29738 (27023, 32250)                                             |  |                            |
|                             |                                      |                                | <i>% OSTK</i>                     | 87.1 (73.9, 93.3)  | 83.7 (69.6, 91.6) | 89.7 (77.4, 94.1) | 82.6 (67.8, 90.7)  | 79.1 (64.3, 88.2) | 77.6 (63.3, 86.5) | 71.2 (59, 80.3)   | 65.9 (50.6, 77.3) | 67.1 (56, 75.4)   | 62.4 (49.4, 71.3) | 49.4 (32.6, 47)      | 46.9 (42.6, 50.8)    | 56.9 (42.6, 50.8)                                                |  |                            |
|                             |                                      | Black                          | <i>N deaths</i>                   | 15 (13, 16)        | 8 (7, 8)          | 71 (63, 75)       | 51 (45, 54)        | 244 (207, 265)    | 194 (163, 211)    | 598 (489, 661)    | 410 (332, 464)    | 766 (655, 847)    | 582 (497, 660)    | 861 (725, 988)       | 1495 (1216, 1726)    | 5469 (5126, 5780)                                                |  |                            |
|                             |                                      |                                | <i>% OSTK</i>                     | 90.6 (79.1, 95.6)  | 86.5 (74.2, 93.2) | 90.9 (81.1, 95.8) | 90.8 (79.5, 95.9)  | 83 (70.5, 90.3)   | 82.9 (69.6, 90.3) | 76.2 (62.3, 84.2) | 71.7 (58.1, 81.1) | 72 (61.5, 79.6)   | 67.3 (57.3, 76.2) | 48.2 (40.6, 55.4)    | 43 (34.9, 49.6)      | 59.2 (55.5, 62.6)                                                |  |                            |
|                             |                                      | Hispanic                       | <i>N deaths</i>                   | 5 (4, 6)           | 7 (6, 7)          | 29 (24, 31)       | 7 (6, 7)           | 53 (45, 58)       | 53 (45, 58)       | 172 (144, 192)    | 112 (89, 127)     | 233 (188, 267)    | 161 (125, 193)    | 520 (428, 626)       | 753 (607, 889)       | 2188 (2012, 2361)                                                |  |                            |
|                             |                                      |                                | <i>% OSTK</i>                     | 86.5 (74.6, 92.9)  | 85 (70.5, 92.5)   | 84.6 (70, 92)     | 81.4 (66.8, 90.2)  | 81.7 (67.7, 89.4) | 82.5 (70.7, 90.2) | 74 (61.9, 82.4)   | 70.3 (55.9, 79.8) | 64.7 (52.2, 74.2) | 56 (43.6, 67.1)   | 45.4 (37.4, 54.6)    | 42.4 (34.2, 50.1)    | 52.3 (48.1, 56.4)                                                |  |                            |
|                             |                                      | Other                          | <i>N deaths</i>                   | 1 (1, 1)           | 2 (1, 2)          | 7 (6, 8)          | 2 (2, 3)           | 52 (43, 57)       | 107 (89, 119)     | 56 (43, 66)       | 185 (149, 214)    | 156 (129, 182)    | 395 (272, 525)    | 1374 (1233, 1524)    | 3359 (3054, 3497)    | 3292 (3054, 3497)                                                |  |                            |
|                             |                                      |                                | <i>% OSTK</i>                     | 91.4 (80.2, 96.2)  | 76.7 (61.2, 87)   | 82.3 (69.5, 90.8) | 76.6 (59.2, 87.1)  | 80.5 (67.6, 88.8) | 79.6 (65.4, 88.9) | 76.7 (64.3, 85.8) | 66.1 (51.3, 78.2) | 73.2 (59, 84.6)   | 60.2 (45.7, 74.4) | 48 (37.7, 58)        | 33.9 (23.4, 45.1)    | 50.5 (45.3, 56)                                                  |  |                            |
|                             |                                      | <b>Total</b>                   | <i>N deaths</i>                   | 41 (35, 44)        | 37 (31, 40)       | 200 (172, 216)    | 142 (117, 156)     | 804 (675, 895)    | 581 (482, 642)    | 2237 (1825, 2510) | 1466 (1205, 1659) | 3688 (3002, 4176) | 3928 (3187, 4798) | 9122 (7417, 10788)   | 17122 (15387, 18910) | 39289 (35902, 42399)                                             |  |                            |
|                             |                                      |                                | <i>% OSTK</i>                     | 86.9 (74, 93.3)    | 83.6 (70.5, 91.6) | 86.3 (74, 93.2)   | 82.8 (68.4, 91.1)  | 78.6 (66, 87.4)   | 78.5 (65, 86.7)   | 73 (59.6, 81.9)   | 70.7 (58.1, 80)   | 65.9 (53.7, 74.6) | 63.1 (51, 71.6)   | 43.1 (35, 51)        | 42.2 (34.1, 48.7)    | 49.4 (45.1, 53.3)                                                |  |                            |
| <b>Diet<sup>a</sup></b>     | <b>Diabetes</b>                      | <b>Overall by age</b>          | <i>N deaths</i>                   | 516 (465, 561)     |                   | 1457 (1316, 1589) |                    | 3992 (3509, 4342) |                   | 7012 (6094, 7866) |                   | 8033 (6998, 9047) |                   | 10368 (9058, 11537)  |                      | <b>M: 18753 (17247, 20096)</b><br><b>F: 13956 (12598, 15137)</b> |  |                            |
|                             |                                      |                                | <i>% DM</i>                       | 86.3 (77.8, 93.8)  |                   | 84.5 (76.4, 92.2) |                    | 73.8 (64.9, 80.3) |                   | 60.1 (52.3, 67.5) |                   | 52.4 (45.6, 59)   |                   | 31.2 (27.3, 34.8)    |                      | <b>M: 52.7 (48.5, 56.5)</b><br><b>F: 43.1 (38.9, 46.8)</b>       |  |                            |
|                             |                                      | <b>Education</b>               |                                   |                    |                   |                   |                    |                   |                   |                   |                   |                   |                   |                      |                      |                                                                  |  |                            |
|                             |                                      | <High-school                   | <i>N deaths</i>                   | 73 (65, 78)        | 50 (43, 55)       | 217 (185, 235)    | 121 (101, 138)     | 564 (494, 619)    | 315 (264, 362)    | 917 (759, 1040)   | 543 (447, 627)    | 1257 (1022, 1446) | 888 (703, 1041)   | 1623 (1327, 1930)    | 2000 (1624, 2347)    | 8974 (8396, 9514)                                                |  |                            |
|                             |                                      |                                | <i>% DM</i>                       | 90.7 (79.7, 96.7)  | 87.6 (75.7, 96.1) | 89.6 (76.4, 97.1) | 89.9 (74.7, 102.3) | 80.6 (70.6, 88.6) | 74.7 (62.8, 86)   | 69.9 (57.9, 79.2) | 60.3 (49.6, 69.6) | 59.4 (48.3, 68.4) | 52.6 (41.7, 61.7) | 38.1 (31.2, 45.3)    | 32.2 (26.2, 37.8)    | 49.5 (46.3, 52.5)                                                |  |                            |
|                             |                                      | High-school                    | <i>N deaths</i>                   | 217 (194, 233)     | 150 (127, 168)    | 652 (570, 703)    | 386 (329, 447)     | 1754 (1509, 1941) | 1013 (853, 1149)  | 3013 (2504, 3444) | 1767 (1431, 2107) | 2906 (2346, 3427) | 1935 (1558, 2246) | 2465 (2029, 2882)    | 3033 (2461, 3589)    | 20316 (19187, 21434)                                             |  |                            |
|                             |                                      |                                | <i>% DM</i>                       | 93.5 (83.5, 100.4) | 87.7 (74.2, 98.2) | 89.1 (77.9, 96)   | 86.1 (73.4, 99.7)  | 77.4 (66.6, 85.7) | 73 (61.5, 82.9)   | 65 (54, 74.3)     | 59.4 (48.1, 70.9) | 56.7 (45.8, 66.9) | 47.9 (38.6, 55.6) | 31.7 (26.1, 37)      | 29.5 (23.9, 34.9)    | 50.7 (47.9, 53.5)                                                |  |                            |
|                             |                                      | College                        | <i>N deaths</i>                   | 24 (21, 27)        | 15 (12, 17)       | 68 (57, 76)       | 32 (26, 37)        | 237 (195, 290)    | 104 (86, 121)     | 558 (453, 659)    | 239 (189, 287)    | 622 (500, 736)    | 300 (230, 370)    | 758 (600, 917)       | 550 (267, 438)       | 3408 (3156, 3706)                                                |  |                            |
|                             |                                      |                                | <i>% DM</i>                       | 77.7 (67.1, 85.9)  | 69.8 (58, 78.7)   | 77.6 (66, 87)     | 66.3 (54.8, 76.9)  | 70.9 (58.3, 86.7) | 57.9 (47.7, 67.2) | 55.5 (45.1, 65.6) | 45.8 (36.1, 54.8) | 46.7 (37.5, 53.5) | 40.6 (32.4, 37)   | 30.6 (24.2, 37)      | 22.8 (17.3, 28.5)    | 41.2 (38.1, 44.8)                                                |  |                            |
|                             |                                      | <b>Race</b>                    |                                   |                    |                   |                   |                    |                   |                   |                   |                   |                   |                   |                      |                      |                                                                  |  |                            |
|                             |                                      | White                          | <i>N deaths</i>                   | 174 (150, 193)     | 108 (89, 129)     | 509 (451, 555)    | 301 (257, 343)     | 1562 (1303, 1758) | 780 (654, 876)    | 2936 (2395, 3355) | 1492 (1193, 1802) | 3296 (2666, 3842) | 2060 (1663, 2438) | 3742 (3096, 4391)    | 3656 (2993, 4311)    | 21474 (20058, 22729)                                             |  |                            |
|                             |                                      |                                |                                   |                    |                   |                   |                    |                   |                   |                   |                   |                   |                   |                      |                      |                                                                  |  |                            |

**eTable 14. Absolute and proportional cardiometabolic disease mortality associated with suboptimal dietary habits in the US in 2012 by population subgroups (continued)**

| Dietary Factor <sup>a</sup> | Cardiometabolic Disease <sup>b</sup> | Population strata <sup>c</sup> | Associated mortality <sup>d</sup> | Age                                    |                                     |                                        |                                      |                                           |                                        |                                           |                                           |                                           |                                           |                                           |                                            | Total (25+ y)<br>(95% UIs)                                       |                                                            |
|-----------------------------|--------------------------------------|--------------------------------|-----------------------------------|----------------------------------------|-------------------------------------|----------------------------------------|--------------------------------------|-------------------------------------------|----------------------------------------|-------------------------------------------|-------------------------------------------|-------------------------------------------|-------------------------------------------|-------------------------------------------|--------------------------------------------|------------------------------------------------------------------|------------------------------------------------------------|
|                             |                                      |                                |                                   | 25-34 y                                |                                     | 35-44 y                                |                                      | 45-54 y                                   |                                        | 55-64 y                                   |                                           | 65-74 y                                   |                                           | 75+ y                                     |                                            |                                                                  |                                                            |
|                             |                                      |                                |                                   | Males<br>(95% UIs)                     | Females<br>(95% UIs)                | Males<br>(95% UIs)                     | Females<br>(95% UIs)                 | Males<br>(95% UIs)                        | Females<br>(95% UIs)                   | Males<br>(95% UIs)                        | Females<br>(95% UIs)                      | Males<br>(95% UIs)                        | Females<br>(95% UIs)                      | Males<br>(95% UIs)                        | Females<br>(95% UIs)                       |                                                                  |                                                            |
|                             |                                      | College                        | <i>N deaths</i><br>% <i>CMD</i>   | 152 (138, 163)<br>57.9 (52.6, 62.4)    | 80 (73, 86)<br>49 (44.7, 53)        | 654 (604, 693)<br>69.4 (64.1, 73.6)    | 252 (226, 276)<br>52.3 (47, 57.4)    | 2120 (1892, 2317)<br>64.7 (57.7, 70.7)    | 735 (666, 799)<br>54.1 (49, 58.8)      | 5125 (4583, 5639)<br>56.3 (50.4, 62)      | 1814 (1648, 1975)<br>50.5 (45.8, 54.9)    | 1814 (1648, 1975)<br>50.5 (45.8, 54.9)    | 5510 (4849, 6066)<br>43.5 (38, 48.8)      | 2204 (1929, 2473)<br>29.3 (25.5, 33.4)    | 12454 (10886, 14058)<br>79.3 (69.17, 9054) | 2953 (25.5, 33.4)                                                | 39886 (37993, 42006)<br>39.1 (37.2, 41.2)                  |
|                             |                                      | <b>Race</b>                    |                                   |                                        |                                     |                                        |                                      |                                           |                                        |                                           |                                           |                                           |                                           |                                           |                                            |                                                                  |                                                            |
|                             |                                      | White                          | <i>N deaths</i><br>% <i>CMD</i>   | 923 (849, 990)<br>68.7 (63.2, 73.7)    | 429 (389, 468)<br>63.9 (57.9, 69.6) | 3771 (3507, 3976)<br>76.1 (70.8, 80.3) | 1594 (1472, 1712)<br>67.1 (61.9, 72) | 13440 (12363, 14464)<br>69.5 (63.9, 74.8) | 5131 (4704, 5515)<br>63.1 (57.8, 67.8) | 24461 (22076, 26853)<br>58.8 (53.1, 64.6) | 9588 (8481, 10475)<br>52.8 (46.7, 57.6)   | 9588 (8481, 10475)<br>52.8 (46.7, 57.6)   | 29907 (27169, 32534)<br>55.2 (50.2, 60.1) | 16709 (15354, 17994)<br>52.3 (48.1, 56.3) | 56966 (50627, 62665)<br>35.6 (31.7, 39.2)  | 66801 (60383, 73145)<br>31.7 (28.7, 34.7)                        | 236505 (226292, 246067)<br>42.8 (40.9, 44.5)               |
|                             |                                      | Black                          | <i>N deaths</i><br>% <i>CMD</i>   | 410 (383, 433)<br>66.9 (62.7, 70.7)    | 223 (205, 239)<br>61.9 (57, 66.4)   | 1529 (1436, 1604)<br>74 (69.5, 77.6)   | 801 (751, 844)<br>69.2 (64.9, 73)    | 4000 (3699, 4269)<br>67.8 (62.7, 72.3)    | 2442 (2279, 2592)<br>66.7 (62.3, 70.8) | 6358 (5837, 6840)<br>61.3 (56.3, 66)      | 3738 (3425, 4014)<br>57.7 (52.9, 62)      | 3738 (3425, 4014)<br>57.7 (52.9, 62)      | 5949 (5499, 6379)<br>61.1 (56.5, 65.6)    | 4299 (3966, 4586)<br>56.7 (52.3, 60.5)    | 5604 (5087, 6170)<br>40.4 (36.7, 44.5)     | 8483 (7401, 9462)<br>37.1 (32.4, 41.4)                           | 44946 (43651, 46330)<br>53.1 (51.6, 54.8)                  |
|                             |                                      | Hispanic                       | <i>N deaths</i><br>% <i>CMD</i>   | 217 (201, 230)<br>66.4 (61.6, 70.4)    | 87 (80, 94)<br>63.7 (58.8, 68.3)    | 674 (622, 718)<br>67.5 (62.3, 71.9)    | 232 (211, 248)<br>62.4 (56.9, 66.8)  | 1807 (1683, 1914)<br>72.5 (683, 765)      | 725 (683, 765)<br>68.7 (64.8, 72.5)    | 2728 (2531, 2916)<br>65 (60.3, 69.4)      | 1245 (1152, 1342)<br>59.3 (54.9, 64)      | 1245 (1152, 1342)<br>59.3 (54.9, 64)      | 2578 (2331, 2794)<br>56.5 (51.1, 61.3)    | 1533 (1369, 1697)<br>49.9 (44.5, 55.2)    | 3923 (3408, 4417)<br>40.3 (35.4, 45.4)     | 4579 (4122, 5014)<br>50 (48.2, 51.8)                             | 20923 (20185, 21675)<br>48.1 (45.7, 51.4)                  |
|                             |                                      | Other                          | <i>N deaths</i><br>% <i>CMD</i>   | 89 (82, 96)<br>67.6 (62.2, 72.6)       | 38 (34, 42)<br>51.8 (46.2, 57.7)    | 307 (279, 332)<br>67.8 (61.7, 73.3)    | 100 (89, 109)<br>58.5 (52.1, 63.8)   | 859 (764, 926)<br>69.4 (61.7, 74.8)       | 302 (277, 324)<br>63.4 (58.1, 68.1)    | 1472 (1344, 1592)<br>68.1 (62.1, 73.6)    | 561 (510, 612)<br>60.6 (53.7, 68)         | 561 (510, 612)<br>60.6 (53.7, 68)         | 1535 (1359, 1722)<br>49.7 (43.3, 60.2)    | 834 (725, 1010)<br>37.5 (32.1, 44.5)      | 2138 (1834, 2537)<br>48.1 (45.7, 51.4)     | 2328 (1963, 2858)<br>50 (48.2, 51.8)                             | 10940 (10390, 11681)<br>48.1 (45.7, 51.4)                  |
|                             |                                      | <b>Total</b>                   | <i>N deaths</i><br>% <i>CMD</i>   | 1587 (1461, 1708)<br>65.8 (60.5, 70.8) | 763 (699, 820)<br>61.4 (56.3, 66)   | 6131 (5672, 6528)<br>72.4 (67, 77.1)   | 2688 (2447, 2907)<br>65.9 (60, 71.3) | 20125 (18299, 21509)<br>69.4 (63.1, 74.2) | 8565 (7913, 9146)<br>64.3 (59.4, 68.6) | 34711 (31467, 37717)<br>59.5 (54, 64.7)   | 15896 (14533, 17051)<br>57.1 (52.2, 61.3) | 15896 (14533, 17051)<br>57.1 (52.2, 61.3) | 38623 (35176, 41871)<br>53.1 (48.9, 57.3) | 23500 (21645, 25363)<br>36 (32.1, 39.8)   | 68170 (60739, 75379)<br>36 (32.1, 39.8)    | 89757 (80808, 98140)<br>36 (32.1, 39.8)                          | <b>236505 (226292, 246067)</b><br><b>42.8 (40.9, 44.5)</b> |
| <b>Fruits</b>               | <b>Coronary heart disease</b>        | <b>Overall by age</b>          | <i>N deaths</i>                   | 172 (92, 241)                          | 865 (485, 1225)                     | 2632 (1427, 3803)                      | 4752 (2589, 6807)                    | 5002 (2832, 7163)                         | 10415 (6426, 14398)                    |                                           |                                           |                                           |                                           |                                           |                                            | <b>M: 14778 (10844, 18908)</b><br><b>F: 9008 (5984, 12067)</b>   |                                                            |
| <b>(&lt;300 g/d)</b>        |                                      | <b>% CHD</b>                   |                                   | 16.8 (8.9, 23.5)                       | 16.7 (9.4, 23.6)                    | 12 (6.5, 17.4)                         | 10 (5.4, 14.3)                       | 8 (4.5, 11.4)                             | 4.5 (2.8, 6.2)                         |                                           |                                           |                                           |                                           |                                           |                                            | <b>M: 7.2 (5.3, 9.2)</b><br><b>F: 5.5 (3.6, 7.3)</b>             |                                                            |
|                             |                                      | <b>Education</b>               |                                   |                                        |                                     |                                        |                                      |                                           |                                        |                                           |                                           |                                           |                                           |                                           |                                            |                                                                  |                                                            |
|                             |                                      | <High-school                   | <i>N deaths</i><br>% <i>CHD</i>   | 28 (11, 44)<br>16.7 (6.7, 26.2)        | 11 (4, 16)<br>18.6 (7.8, 28.7)      | 135 (53, 202)<br>18.4 (7.2, 27.5)      | 47 (19, 73)<br>16.1 (6.5, 24.9)      | 463 (191, 695)<br>14.5 (6, 21.8)          | 167 (63, 258)<br>14.1 (5.3, 21.8)      | 665 (283, 1083)<br>11.1 (4.7, 18.1)       | 263 (100, 412)<br>10.8 (4.1, 16.9)        | 665 (283, 1083)<br>11.1 (4.7, 18.1)       | 864 (389, 1335)<br>9.7 (4.4, 15)          | 419 (161, 678)<br>8.7 (3.4, 14.1)         | 1607 (738, 2432)<br>5.9 (2.7, 8.9)         | 1821 (870, 2718)<br>5.3 (2.5, 7.9)                               | 6528 (4957, 7925)<br>7.3 (5.5, 8.9)                        |
|                             |                                      | High-school                    | <i>N deaths</i><br>% <i>CHD</i>   | 90 (38, 138)<br>17.5 (7.4, 27)         | 29 (11, 44)<br>16.8 (6.4, 25.6)     | 475 (219, 722)<br>18 (8.3, 27.4)       | 152 (55, 239)<br>16.8 (7.1, 26.4)    | 1368 (563, 2222)<br>12.5 (5.2, 20.3)      | 478 (202, 730)<br>12.8 (4.9, 19.5)     | 2453 (960, 3862)<br>11.1 (4.3, 17.5)      | 878 (387, 1413)<br>10 (4.4, 16.2)         | 2453 (960, 3862)<br>11.1 (4.3, 17.5)      | 2241 (886, 3624)<br>9.1 (3.6, 14.8)       | 970 (383, 1551)<br>7.2 (2.8, 11.4)        | 2990 (1446, 4580)<br>4.5 (2.2, 6.9)        | 14765 (11648, 17912)<br>4 (2, 6.2)                               | 4765 (3188, 6353)<br>6.7 (5.3, 8.1)                        |
|                             |                                      | College                        | <i>N deaths</i><br>% <i>CHD</i>   | 13 (5, 19)<br>16.7 (7.2, 25.5)         | 4 (1, 7)<br>13.4 (4.3, 21.1)        | 60 (26, 94)<br>14.3 (6.1, 22.5)        | 16 (7, 26)<br>13.1 (5.5, 21.4)       | 178 (77, 293)<br>10.8 (4.3, 17.4)         | 53 (21, 86)<br>9.6 (4.1, 15.7)         | 436 (186, 697)<br>8 (3.4, 12.8)           | 114 (47, 197)<br>7.1 (2.9, 12.3)          | 436 (186, 697)<br>8 (3.4, 12.8)           | 450 (167, 748)<br>6.4 (2.4, 10.6)         | 119 (45, 205)<br>5.3 (2, 9.2)             | 806 (402, 1295)<br>4.1 (1.9, 6.6)          | 509 (240, 818)<br>4.1 (1.9, 6.6)                                 | 2796 (2090, 3486)<br>5.2 (3.9, 6.5)                        |
|                             |                                      | <b>Race</b>                    |                                   |                                        |                                     |                                        |                                      |                                           |                                        |                                           |                                           |                                           |                                           |                                           |                                            |                                                                  |                                                            |
|                             |                                      | White                          | <i>N deaths</i><br>% <i>CHD</i>   | 80 (37, 123)<br>17.2 (7.9, 26.4)       | 25 (11, 39)<br>15.6 (7, 24.4)       | 426 (174, 657)<br>16.9 (6.9, 26)       | 143 (56, 225)<br>15.6 (6.1, 24.4)    | 1399 (553, 2274)<br>11.7 (4.6, 19.1)      | 470 (206, 762)<br>15.4 (5.4, 20.1)     | 2628 (1092, 4018)<br>10.1 (4.2, 15.4)     | 826 (305, 1333)<br>9 (3.3, 14.6)          | 2628 (1092, 4018)<br>10.1 (4.2, 15.4)     | 2604 (1079, 4282)<br>7.9 (3.3, 13)        | 1091 (483, 1771)<br>6.9 (3.1, 11.2)       | 4008 (1922, 6209)<br>4.3 (2.1, 6.6)        | 4619 (2259, 6973)<br>4.5 (2.2, 6.8)                              | 18310 (14334, 22545)<br>6.1 (4.8, 7.5)                     |
|                             |                                      | Black                          | <i>N deaths</i><br>% <i>CHD</i>   | 33 (14, 52)<br>18.8 (8, 29.8)          | 12 (5, 19)<br>17.5 (7.1, 27)        | 140 (60, 213)<br>18.6 (8, 28.3)        | 15 (6, 23.7)<br>17.5 (7.3, 26.7)     | 359 (146, 566)<br>13.9 (5.7, 22)          | 124 (53, 211)<br>12.4 (5, 19.3)        | 552 (239, 855)<br>10.8 (4.7, 16.7)        | 275 (111, 435)<br>10.2 (4.1, 16.1)        | 552 (239, 855)<br>10.8 (4.7, 16.7)        | 445 (183, 714)<br>9.2 (3.8, 14.8)         | 275 (111, 435)<br>9.3 (3.8, 14.4)         | 445 (183, 714)<br>6.1 (3.1, 9.1)           | 518 (243, 821)<br>4.9 (2.3, 7.7)                                 | 3287 (2657, 3914)<br>8.4 (6.8, 10)                         |
|                             |                                      | Hispanic                       | <i>N deaths</i><br>% <i>CHD</i>   | 12 (5, 19)<br>15.6 (6.6, 23.6)         | 3 (1, 5)<br>16.4 (7.2, 25.5)        | 58 (27, 90)<br>16.5 (7.6, 25.6)        | 13 (5, 21)<br>14.6 (5.9, 22.3)       | 145 (62, 235)<br>12.2 (5.2, 19.8)         | 45 (16, 71)<br>13 (4.7, 20.3)          | 233 (95, 366)<br>10.4 (4.2, 16.4)         | 83 (34, 134)<br>9.5 (4, 15.3)             | 233 (95, 366)<br>10.4 (4.2, 16.4)         | 229 (83, 359)<br>9.3 (3.4, 14.5)          | 88 (37, 144)<br>5.1 (2.5, 7.8)            | 276 (134, 422)<br>3.2 (1.9, 5.1)           | 322 (149, 510)<br>5.1 (2.5, 7.8)                                 | 1516 (1174, 1816)<br>7.3 (5.7, 8.8)                        |
|                             |                                      | Other                          | <i>N deaths</i><br>% <i>CHD</i>   | 8 (3, 12)<br>17.7 (7.8, 26.9)          | 1 (1, 2)<br>13.8 (5.7, 21.7)        | 32 (13, 50)<br>15 (6.3, 23.7)          | 6 (2, 10)<br>13 (5, 21.6)            | 80 (30, 128)<br>11 (3.9, 19.2)            | 15 (6, 27)<br>10 (3.9, 17.8)           | 111 (42, 189)<br>9.3 (3.5, 15.8)          | 30 (12, 54)<br>7.2 (2.8, 13.1)            | 111 (42, 189)<br>9.3 (3.5, 15.8)          | 103 (35, 190)<br>7.5 (2.5, 13.7)          | 55 (20, 99)<br>7.9 (2.9, 14.2)            | 166 (79, 273)<br>5.4 (2.5, 8.8)            | 73 (21, 161)<br>2.2 (0.6, 4.8)                                   | 691 (517, 884)<br>6.1 (4.6, 7.9)                           |
|                             |                                      | <b>Total</b>                   | <i>N deaths</i><br>% <i>CHD</i>   | 130 (55, 194)<br>17 (7.2, 25.5)        | 42 (18, 65)<br>15.9 (6.8, 24.6)     | 663 (287, 1002)<br>17.3 (7.5, 26.1)    | 212 (95, 318)<br>15.8 (7.1, 23.7)    | 1961 (791, 3008)<br>12.3 (5.1, 18.8)      | 680 (281, 1044)<br>10.1 (4.2, 15.7)    | 3505 (1470, 5422)<br>9.4 (3.9, 14.02)     | 1225 (514, 1905)<br>8.3 (3.8, 13.5)       | 3505 (1470, 5422)<br>9.4 (3.9, 14.02)     | 3458 (1573, 5646)<br>7.3 (2.7, 11.4)      | 1538 (577, 2393)<br>4.7 (2.1, 7.1)        | 5089 (2287, 7740)<br>4.7 (2.1, 7.1)        | 5339 (2559, 8091)<br>4.3 (2.1, 6.6)                              | <b>23865 (18658, 28884)</b><br><b>6.4 (5.7, 8)</b>         |
| <b>Fruits</b>               | <b>Stroke, total</b>                 | <b>Overall by age</b>          | <i>N deaths</i>                   | 307 (231, 355)                         | 992 (764, 1158)                     | 2573 (2019, 3009)                      | 4207 (3278, 5100)                    | 5500 (4385, 6574)                         | 15152 (12332, 17910)                   |                                           |                                           |                                           |                                           |                                           |                                            | <b>M: 13239 (11260, 15000)</b><br><b>F: 15532 (12788, 17990)</b> |                                                            |
| <b>(&lt;300 g/d)</b>        |                                      | <b>% TSTK</b>                  |                                   | 57.3 (43.3, 66.4)                      | 57.3 (44.2, 67)                     | 45.5 (35.7, 53.2)                      | 38 (29.6, 46.1)                      | 30.3 (24.1, 36.2)                         | 16.6 (13.5, 19.7)                      |                                           |                                           |                                           |                                           |                                           |                                            | <b>M: 25.2 (21.5, 28.6)</b><br><b>F: 20.5 (16.9, 23.7)</b>       |                                                            |
|                             |                                      | <b>Education</b>               |                                   |                                        |                                     |                                        |                                      |                                           |                                        |                                           |                                           |                                           |                                           |                                           |                                            |                                                                  |                                                            |
|                             |                                      | <High-school                   | <i>N deaths</i><br>% <i>TSTK</i>  | 38 (23, 46)<br>60.8 (37.4, 74.1)       | 28 (18, 34)<br>62.7 (41, 75.4)      | 136 (90, 164)<br>61.6 (40.9, 74.1)     | 93 (65, 112)<br>59.1 (41.4, 71.3)    | 398 (291, 484)<br>51.9 (36.7, 62.1)       | 253 (179, 303)<br>40.8 (29, 50.6)      | 536 (382, 665)<br>39.7 (28.1, 49.2)       | 346 (245, 429)<br>27.6 (19.1, 42.2)       | 536 (382, 665)<br>39.7 (28.1, 49.2)       | 784 (566, 997)<br>35.5 (25.6, 45.1)       | 625 (444, 790)<br>32.3 (22.9, 40.8)       | 1730 (1301, 2162)<br>18.9 (13.8, 23.2)     | 2916 (2127, 3586)<br>15 (11.1, 19)                               | 7844 (6870, 8700)<br>22.8 (20.4, 25.2)                     |
|                             |                                      | High-school                    | <i>N deaths</i><br>% <i>TSTK</i>  | 119 (80, 145)<br>59.2 (40, 72.1)       | 89 (61, 107)<br>58.8 (40.4, 70.7)   | 374 (256, 447)<br>61 (41.7, 73)        | 281 (186, 337)<br>59.4 (39.2, 71.1)  | 913 (641, 1124)<br>47 (33, 57.8)          | 830 (570, 1043)<br>48.1 (33, 60.4)     | 1649 (1177, 2065)<br>40.1 (27, 50.4)      | 1235 (831, 1552)<br>40.1 (27, 50.4)       | 1649 (1177, 2065)<br>40.1 (27, 50.4)      | 1879 (1325, 2376)<br>34.8 (24.5, 43.9)    | 1545 (1071, 2034)<br>28.6 (19.8, 37.7)    | 2863 (2062, 3634)<br>17.5 (12.6, 22.2)     | 5357 (3953, 6754)<br>15 (11.1, 19)                               | 17071 (15284, 18899)<br>22.8 (20.4, 25.2)                  |
|                             |                                      | College                        | <i>N deaths</i><br>% <i>TSTK</i>  | 19 (12, 23)<br>58 (37.2, 70.6)         | 16 (11, 19)<br>43.7 (30.8, 53.4)    | 60 (38, 75)<br>54 (34.1, 67)           | 60 (37, 75)<br>47.6 (29.7, 59.7)     | 130 (84, 168)<br>39.2 (25.4, 50.6)        | 127 (81, 166)<br>43.5 (27.8, 56.6)     | 303 (206, 386)<br>32.4 (22.1, 41.3)       | 204 (132, 273)<br>31.9 (20.6, 42.7)       | 303 (206, 386)<br>32.4 (22.1, 41.3)       | 446 (293, 588)<br>25.9 (17, 34.1)         | 256 (163, 348)<br>23.5 (14.9, 31.9)       | 1021 (711, 1348)<br>14.7 (10.3, 19.5)      | 1083 (772, 1445)<br>15.4 (11, 20.6)                              | 3731 (3248, 4254)<br>19.4 (16.9, 22.1)                     |
|                             |                                      | <b>Race</b>                    |                                   |                                        |                                     |                                        |                                      |                                           |                                        |                                           |                                           |                                           |                                           |                                           |                                            |                                                                  |                                                            |
|                             |                                      | White                          | <i>N deaths</i><br>% <i>TSTK</i>  | 90 (58, 108)<br>60.1 (38.9, 71.8)      | 72 (49, 87)<br>56.1 (38.3, 67.7)    | 266 (186, 316)<br>58.5 (40.8, 69.5)    | 220 (153, 270)<br>54.5 (37.9, 66.9)  | 739 (491, 924)<br>51.9 (36.7, 62.1)       | 671 (452, 823)<br>38.7 (27.5, 48.2)    | 1540 (1094, 1921)<br>1056 (723, 1362)     | 1066 (723, 1362)<br>39.7 (27.5, 48.2)     | 1540 (1094, 1921)<br>1056 (723, 1362)     | 2158 (1557, 2763)<br>31.2 (22.5, 40)      | 1693 (1174, 2182)<br>16.9 (12.2, 20.2)    | 4487 (3233, 5656)<br>21 (15.8, 26.2)       | 7982 (6042, 10015)<br>11.2 (7.1, 14.7)                           | 20941 (18491, 23490)<br>13.8 (11.3, 16.2)                  |
|                             |                                      | Black                          | <i>N deaths</i><br>% <i>TSTK</i>  | 44 (32, 53)<br>63.5 (45.5, 75.3)       | 30 (21, 36)<br>58.1 (40.8, 70.3)    | 164 (114, 193)<br>64.3 (44.8, 75.6)    | 127 (84, 153)<br>50.3 (34.4, 61.8)   | 447 (307, 550)<br>38.5 (31.7, 59.9)       | 367 (240, 454)<br>40.8 (28.4, 50.7)    | 621 (432, 772)<br>39.5 (27.8, 47.3)       | 462 (326, 573)<br>34.1 (24, 42.7)         | 621 (432, 772)<br>39.5 (27.8, 47.3)       | 546 (384, 685)<br>22.2 (160, 285)         | 489 (345, 614)<br>17.4 (121, 223)         | 853 (617, 1082)<br>18.5 (14, 24.6)         | 4677 (4230, 5104)<br>23.8 (25.2, 31.1)                           | 2170 (1937, 2389)<br>28.3 (25.2, 31.1)                     |
|                             |                                      | Hispanic                       | <i>N deaths</i><br>% <i>TSTK</i>  | 33 (22, 41)<br>56.3 (36.7, 69.5)       | 23 (16, 2                           |                                        |                                      |                                           |                                        |                                           |                                           |                                           |                                           |                                           |                                            |                                                                  |                                                            |

**eTable 14. Absolute and proportional cardiometabolic disease mortality associated with suboptimal dietary habits in the US in 2012 by population subgroups (continued)**

| Dietary Factor <sup>a</sup> | Cardiometabolic Disease <sup>b</sup> | Population strata <sup>c</sup> | Associated mortality <sup>d</sup> | Age                                |                                   |                                     |                                     |                                      |                                      |                                      |                                     |                                        |                                                          | Total (25+ y) (95% UIs)                                          |                                         |                                         |                                        |
|-----------------------------|--------------------------------------|--------------------------------|-----------------------------------|------------------------------------|-----------------------------------|-------------------------------------|-------------------------------------|--------------------------------------|--------------------------------------|--------------------------------------|-------------------------------------|----------------------------------------|----------------------------------------------------------|------------------------------------------------------------------|-----------------------------------------|-----------------------------------------|----------------------------------------|
|                             |                                      |                                |                                   | 25-34 y                            |                                   | 35-44 y                             |                                     | 45-54 y                              |                                      | 55-64 y                              |                                     | 65-74 y                                |                                                          |                                                                  | 75+ y                                   |                                         |                                        |
|                             |                                      |                                |                                   | Males                              | Females                           | Males                               | Females                             | Males                                | Females                              | Males                                | Females                             | Males                                  | Females                                                  |                                                                  | Males                                   | Females                                 |                                        |
|                             |                                      |                                |                                   | (95% UIs)                          | (95% UIs)                         | (95% UIs)                           | (95% UIs)                           | (95% UIs)                            | (95% UIs)                            | (95% UIs)                            | (95% UIs)                           | (95% UIs)                              | (95% UIs)                                                |                                                                  | (95% UIs)                               | (95% UIs)                               |                                        |
|                             |                                      | White                          | <i>N deaths</i><br><i>% ISTK</i>  | 6 (4, 8)<br>33.5 (20.6, 45.2)      | 6 (3, 8)<br>31 (18.9, 41.9)       | 18 (11, 25)<br>33 (20.4, 44.2)      | 15 (9, 20)<br>30.3 (18.3, 41.5)     | 47 (26, 66)<br>24.1 (13.2, 33.9)     | 40 (23, 54)<br>25.2 (14.6, 34.1)     | 104 (60, 146)<br>20.6 (11.9, 28.8)   | 54 (31, 78)<br>18.9 (10.8, 27.3)    | 136 (81, 192)<br>14.3 (8.1, 20.4)      | 98 (55, 140)<br>14.3 (8.1, 20.4)                         | 316 (195, 438)<br>9.3 (5.7, 12.8)                                | 617 (388, 830)<br>9.3 (5.9, 12.6)       | 1455 (1187, 1740)<br>11.4 (9.3, 13.6)   |                                        |
|                             |                                      | Black                          | <i>N deaths</i><br><i>% ISTK</i>  | 3 (2, 4)<br>36.9 (21.7, 50)        | 3 (2, 4)<br>34.8 (21.7, 45.4)     | 6 (3, 8)<br>35.9 (21.6, 47.7)       | 6 (4, 8)<br>34.3 (21.3, 45.6)       | 30 (18, 42)<br>27.8 (16.4, 38.9)     | 15 (9, 20)<br>25.4 (15.5, 34.7)      | 35 (21, 48)<br>22 (13.4, 30.4)       | 24 (14, 34)<br>21.1 (12.3, 29.8)    | 35 (19, 49)<br>19.3 (10.7, 27.5)       | 24 (14, 34)<br>19.1 (11, 26.5)                           | 49 (31, 67)<br>11 (6.1, 14.6)                                    | 78 (47, 113)<br>15.8 (13.6, 18.3)       | 317 (272, 366)<br>15.8 (13.6, 18.3)     | 1317 (1106, 1528)                      |
|                             |                                      | Hispanic                       | <i>N deaths</i><br><i>% ISTK</i>  | 2 (1, 3)<br>30.7 (17.8, 42.1)      | 1 (1, 1)<br>32.6 (19.5, 44.1)     | 6 (3, 7)<br>33.1 (19.7, 43.1)       | 2 (1, 3)<br>29.8 (18, 39.8)         | 9 (5, 12)<br>24.5 (13.4, 35.5)       | 4 (2, 5)<br>25.9 (15.5, 35.6)        | 7 (4, 9)<br>21.5 (12.8, 30.4)        | 7 (4, 9)<br>19.9 (11.6, 27.8)       | 7 (4, 9)<br>14.6 (8.5, 20.6)           | 7 (4, 9)<br>11 (6, 15.4)                                 | 15 (9, 21)<br>10.7 (6.6, 15.4)                                   | 22 (13, 31)<br>42 (26, 60)              | 132 (110, 155)<br>14.3 (12, 16.8)       | 512 (439, 585)                         |
|                             |                                      | Other                          | <i>N deaths</i><br><i>% ISTK</i>  | 0 (0, 0)<br>11 (6, 14)             | 1 (0, 1)<br>28.4 (16.5, 38.9)     | 2 (1, 2)<br>29.5 (17.6, 41)         | 2 (1, 3)<br>26.7 (15.2, 39.4)       | 4 (2, 6)<br>24.3 (13.9, 34.8)        | 1 (1, 2)<br>21.1 (10.9, 31.6)        | 5 (2, 7)<br>19.3 (10.3, 29.5)        | 3 (2, 5)<br>15.2 (7.7, 24.5)        | 5 (3, 7)<br>15.9 (8.4, 24.2)           | 5 (3, 8)<br>16.8 (9, 25.7)                               | 5 (3, 8)<br>11.4 (6.6, 16.8)                                     | 11 (6, 16)<br>4.7 (1.6, 9.4)            | 8 (3, 17)<br>4.7 (1.6, 9.4)             | 47 (38, 59)<br>11.3 (9.2, 14.1)        |
|                             |                                      | Total                          | <i>N deaths</i><br><i>% ISTK</i>  | 11 (6, 14)<br>33.1 (20, 44.6)      | 10 (6, 14)<br>31.5 (17.6, 43)     | 31 (19, 42)<br>33.1 (20.5, 44.4)    | 25 (15, 34)<br>30.7 (18.4, 42.8)    | 83 (49, 117)<br>23.7 (13.9, 33.2)    | 60 (36, 80)<br>25.3 (15.4, 34.1)     | 144 (89, 215)<br>20.8 (12, 28.9)     | 88 (54, 123)<br>19.3 (11.8, 27)     | 150 (91, 219)<br>17.2 (10.2, 24.3)     | 144 (86, 198)<br>14.9 (8.9, 20.4)                        | 190 (112, 268)<br>9.8 (6.4, 13.1)                                | 731 (468, 1010)<br>9.2 (5.9, 12.7)      | 1920 (1602, 2267)<br>11.9 (9.9, 14.1)   |                                        |
| <b>Fruits</b>               | <b>Hemorrhagic Stroke</b>            | <b>Overall by age</b>          | <i>N deaths</i>                   | 234 (161, 280)                     | 701 (485, 859)                    | 1621 (1107, 2028)                   | 2018 (1341, 2582)                   | 2070 (1351, 2650)                    | 3730 (2606, 4847)                    |                                      |                                     |                                        |                                                          | <b>M: 5053 (3990, 6022)</b><br><b>F: 5262 (4052, 6371)</b>       |                                         |                                         |                                        |
| <b>(&lt;300 g/d)</b>        |                                      | <b>% HSTK</b>                  | 61.6 (42.5, 73.9)                 | 60.8 (42.1, 74.6)                  | 49.1 (33.5, 61.4)                 | 42.6 (28.3, 54.5)                   | 35.7 (23.3, 45.7)                   | 21.7 (15.1, 28.1)                    |                                      |                                      |                                     |                                        | <b>M: 23.9 (22.9, 36)</b>                                |                                                                  |                                         |                                         |                                        |
|                             |                                      | <b>Education</b>               |                                   |                                    |                                   |                                     |                                     |                                      |                                      |                                      |                                     |                                        |                                                          |                                                                  |                                         |                                         |                                        |
|                             |                                      | <High-school                   | <i>N deaths</i><br><i>% HSTK</i>  | 30 (16, 38)<br>63.4 (33.7, 80.1)   | 23 (13, 28)<br>66.9 (39.5, 83)    | 104 (58, 130)<br>65.2 (36.1, 81)    | 65 (37, 82)<br>61.7 (35.3, 78.5)    | 240 (138, 310)<br>57.9 (33.2, 74.7)  | 151 (85, 197)<br>56 (31.6, 72.9)     | 234 (123, 320)<br>47.1 (24.8, 64.4)  | 156 (85, 209)<br>45.3 (24.5, 60.7)  | 239 (126, 334)<br>43.4 (22.9, 60.5)    | 206 (105, 287)<br>67 (36.7, 94.5)                        | 404 (223, 557)<br>604 (296, 926)                                 | 623 (353, 860)<br>25.3 (14.3, 34.9)     | 2452 (2059, 2776)<br>35.6 (29.9, 40.3)  |                                        |
|                             |                                      | High-school                    | <i>N deaths</i><br><i>% HSTK</i>  | 93 (54, 117)<br>63.5 (36.7, 79.4)  | 66 (38, 83)<br>63 (36.2, 79.1)    | 252 (139, 313)<br>65.7 (36.2, 81.5) | 204 (109, 257)<br>63.4 (33.8, 80)   | 558 (309, 744)<br>51.8 (28.3, 69.2)  | 563 (312, 846)<br>51.4 (28.5, 68.5)  | 765 (409, 1021)<br>47.2 (25.2, 62.9) | 633 (312, 846)<br>44.7 (22.1, 59.7) | 677 (367, 945)<br>40.7 (22.1, 56.8)    | 604 (296, 926)<br>191 (91, 292)                          | 32.4 (15.9, 49.7)<br>1435 (1171, 1684)                           | 22 (11.5, 31.3)<br>19.6 (10.9, 27.9)    | 166 (91.9, 270)<br>1435 (1171, 1684)    | 32.4 (27.3, 37.1)<br>19.6 (10.9, 27.9) |
|                             |                                      | College                        | <i>N deaths</i><br><i>% HSTK</i>  | 14 (8, 18)<br>62.6 (34.5, 79.5)    | 10 (5, 13)<br>54.1 (28.5, 71.7)   | 48 (27, 63)<br>56.5 (31.2, 73.8)    | 45 (23, 60)<br>53.1 (27, 70)        | 93 (49, 127)<br>42.7 (21.3, 61.8)    | 83 (41, 121)<br>46.6 (24.5, 64)      | 149 (74, 216)<br>36.7 (18.2, 53.3)   | 118 (57, 175)<br>35 (16.9, 51.8)    | 191 (91, 292)<br>30 (14.3, 45.5)       | 151 (81, 218)<br>26.1 (11.3, 40.4)                       | 1435 (1171, 1684)<br>18.2 (10.1, 28.2)                           | 19.6 (10.9, 27.9)<br>19.8 (10.5, 30.6)  | 32.4 (27.3, 37.1)<br>26.5 (21.7, 31.1)  |                                        |
|                             |                                      | <b>Race</b>                    |                                   |                                    |                                   |                                     |                                     |                                      |                                      |                                      |                                     |                                        |                                                          |                                                                  |                                         |                                         |                                        |
|                             |                                      | White                          | <i>N deaths</i><br><i>% HSTK</i>  | 71 (40, 87)<br>64.9 (37.1, 80.1)   | 52 (31, 66)<br>61.6 (36.6, 78)    | 182 (107, 230)<br>63.1 (37.2, 79.8) | 154 (89, 199)<br>59.3 (34.3, 76.4)  | 433 (214, 587)<br>50.3 (24.8, 68.1)  | 430 (253, 573)<br>51.5 (30.3, 68.7)  | 702 (367, 949)<br>44.8 (23.4, 60.5)  | 544 (266, 762)<br>41.2 (20.2, 57.7) | 807 (396, 1126)<br>37.1 (18.2, 51.7)   | 664 (315, 965)<br>31.9 (15.1, 46.3)                      | 1214 (693, 1740)<br>21.3 (12.1, 30.4)                            | 1836 (1067, 2607)<br>21.4 (12.4, 30.4)  | 7051 (5889, 8195)<br>29.5 (24.7, 34.3)  |                                        |
|                             |                                      | Black                          | <i>N deaths</i><br><i>% HSTK</i>  | 31 (18, 38)<br>69.1 (40.7, 85.3)   | 21 (13, 27)<br>64.5 (39.7, 81.2)  | 109 (63, 133)<br>67.6 (38.9, 82.6)  | 87 (45, 110)<br>64.6 (33.5, 81.1)   | 272 (140, 355)<br>55.9 (28.8, 72.9)  | 270 (140, 355)<br>51.9 (25, 67.3)    | 476 (243, 653)<br>46.2 (23.6, 63.6)  | 438 (215, 600)<br>34.6 (17.5, 51.6) | 413 (210, 600)<br>41.9 (21.5, 56.9)    | 40.6 (20.6, 55.4)<br>81 (39, 113)                        | 28.6 (16.5, 39.1)<br>90 (48, 131)                                | 23.1 (11.8, 33.3)<br>91 (38, 120)       | 41.9 (36, 47)<br>991 (856, 1121)        |                                        |
|                             |                                      | Hispanic                       | <i>N deaths</i><br><i>% HSTK</i>  | 28 (17, 36)<br>59.6 (36.6, 75.8)   | 18 (10, 22)<br>63.4 (35.7, 80.1)  | 67 (48, 110)<br>61.7 (34.1, 78.5)   | 44 (24, 56)<br>58.3 (32.4, 74.3)    | 137 (73, 184)<br>51.4 (27.3, 69)     | 133 (66, 202)<br>52.4 (28.6, 69.1)   | 149 (74, 216)<br>45.3 (22.4, 61.6)   | 118 (57, 175)<br>41.7 (22.3, 57.7)  | 191 (91, 292)<br>41 (19.6, 57.3)       | 151 (81, 218)<br>32.8 (15.5, 48.7)                       | 1435 (1171, 1684)<br>24.4 (13.1, 35.7)                           | 19.6 (10.9, 27.9)<br>24.6 (13.4, 35.4)  | 32.4 (27.3, 37.1)<br>38.5 (33.3, 43.5)  |                                        |
|                             |                                      | Other                          | <i>N deaths</i><br><i>% HSTK</i>  | 11 (6, 14)<br>66.1 (37.1, 81.2)    | 8 (4, 11)<br>56.4 (28.9, 74.3)    | 27 (14, 36)<br>58.6 (31.5, 77.3)    | 26 (13, 35)<br>55.1 (27.5, 73.8)    | 56 (29, 76)<br>40.9 (26.4, 68.8)     | 47 (24, 65)<br>44.6 (20.9, 65.6)     | 67 (34, 99)<br>41.7 (20.8, 61.3)     | 51 (25, 79)<br>34.2 (16.8, 53.5)    | 64 (30, 93)<br>35.8 (16.7, 52.5)       | 58 (26, 88)<br>36 (16.3, 54.4)                           | 151 (81, 218)<br>11.2 (3.5, 24.1)                                | 80 (41, 118)<br>25.6 (13, 37.6)         | 545 (453, 636)<br>11.1 (25.8, 36.3)     |                                        |
|                             |                                      | Total                          | <i>N deaths</i><br><i>% HSTK</i>  | 138 (75, 171)<br>63.1 (34.2, 78.5) | 99 (56, 125)<br>61.7 (34.6, 77.8) | 400 (223, 506)<br>63 (35.2, 79.8)   | 312 (163, 400)<br>60.4 (31.5, 77.4) | 831 (462, 1068)<br>48.2 (26.8, 65.5) | 802 (422, 1068)<br>50.8 (26.7, 67.7) | 1137 (568, 1587)<br>43.7 (21.8, 61)  | 898 (471, 1236)<br>42.1 (22.1, 58)  | 1102 (556, 1557)<br>37.9 (19.1, 53.6)  | 969 (475, 1364)<br>33.5 (16.4, 47.2)                     | 1525 (841, 2179)<br>22.4 (12.3, 32)                              | 2232 (1256, 3158)<br>31.7 (26.6, 36.3)  |                                         |                                        |
| <b>Fruits</b>               | <b>Other Stroke</b>                  | <b>Overall by age</b>          | <i>N deaths</i>                   | 234 (161, 280)                     | 701 (485, 859)                    | 1621 (1107, 2028)                   | 2018 (1341, 2582)                   | 2070 (1351, 2650)                    | 3730 (2606, 4847)                    |                                      |                                     |                                        |                                                          | <b>M: 7274 (5689, 8834)</b><br><b>F: 9214 (6857, 11429)</b>      |                                         |                                         |                                        |
| <b>(&lt;300 g/d)</b>        |                                      | <b>% OSTK</b>                  | 61.6 (42.5, 73.9)                 | 60.8 (42.1, 74.6)                  | 49.1 (33.5, 61.4)                 | 42.6 (28.3, 54.5)                   | 35.7 (23.3, 45.7)                   | 21.7 (15.1, 28.1)                    |                                      |                                      |                                     |                                        | <b>M: 23.4 (18.3, 28.4)</b><br><b>F: 19 (14.2, 23.6)</b> |                                                                  |                                         |                                         |                                        |
|                             |                                      | <b>Education</b>               |                                   |                                    |                                   |                                     |                                     |                                      |                                      |                                      |                                     |                                        |                                                          |                                                                  |                                         |                                         |                                        |
|                             |                                      | <High-school                   | <i>N deaths</i><br><i>% OSTK</i>  | 7 (4, 9)<br>60.8 (37.1, 77.9)      | 4 (2, 5)<br>63.9 (36.6, 79.1)     | 26 (15, 32)<br>62.4 (37.4, 78.3)    | 26 (15, 34)<br>59.2 (33.9, 76.6)    | 142 (89, 181)<br>54.1 (34, 69)       | 90 (53, 114)<br>52.7 (31.3, 67.1)    | 271 (161, 368)<br>40.9 (24.3, 55.6)  | 168 (96, 227)<br>40.3 (23, 54.5)    | 490 (301, 669)<br>35.3 (21.7, 48.2)    | 376 (205, 514)<br>32.5 (17.7, 44.5)                      | 1200 (783, 1564)<br>21.2 (13.8, 27.6)                            | 2052 (1327, 2675)<br>18.9 (12.2, 24.6)  | 4817 (3999, 5617)<br>23.3 (19.3, 27.2)  |                                        |
|                             |                                      | High-school                    | <i>N deaths</i><br><i>% OSTK</i>  | 19 (12, 24)<br>61 (38.2, 75.9)     | 18 (11, 23)<br>59.9 (36, 75.2)    | 102 (63, 124)<br>62.3 (38.4, 75.7)  | 64 (37, 78)<br>60.6 (35.4, 74.7)    | 304 (182, 403)<br>47.4 (28.4, 62.9)  | 238 (127, 309)<br>48.9 (26.1, 63.5)  | 790 (463, 1072)<br>40.4 (24, 48.3)   | 558 (319, 761)<br>40.4 (23, 55.1)   | 1093 (644, 1521)<br>34.7 (20.4, 48.3)  | 847 (482, 1185)<br>28.9 (16.4, 40.4)                     | 1871 (1180, 2550)<br>17.5 (11, 23.8)                             | 3699 (2400, 4857)<br>95.6 (79.1, 114.4) | 9565 (7941, 11144)<br>25.6 (17.3, 24.3) |                                        |
|                             |                                      | College                        | <i>N deaths</i><br><i>% OSTK</i>  | 3 (2, 4)<br>59.3 (36.9, 73.5)      | 3 (2, 4)<br>44.5 (28.5, 57.5)     | 10 (6, 13)<br>54.4 (31.8, 70.3)     | 10 (6, 14)<br>48 (27.7, 64.5)       | 39 (22, 56)<br>39.9 (22, 56.7)       | 29 (16, 40)<br>44.5 (23.4, 60.2)     | 135 (73, 189)<br>32.3 (17.5, 45.3)   | 76 (39, 113)<br>31.8 (16.2, 47)     | 226 (116, 328)<br>25.4 (13.1, 37)      | 129 (68, 196)<br>19.5 (9.6, 22.3)                        | 655 (374, 941)<br>75 (45.6, 105.5)                               | 2047 (1653, 2505)<br>14.9 (8.5, 21.3)   |                                         |                                        |
|                             |                                      | <b>Race</b>                    |                                   |                                    |                                   |                                     |                                     |                                      |                                      |                                      |                                     |                                        |                                                          |                                                                  |                                         |                                         |                                        |
|                             |                                      | White                          | <i>N deaths</i><br><i>% OSTK</i>  | 14 (8, 17)<br>59.8 (36.2, 76.1)    | 14 (8, 18)<br>56.9 (32.5, 72.8)   | 66 (41, 82)<br>59.1 (36.9, 74.1)    | 52 (31, 68)<br>55 (32.2, 71.5)      | 259 (147, 351)<br>45.8 (26, 62)      | 194 (113, 257)<br>47.5 (27.7, 62.8)  | 735 (445, 999)<br>38.5 (23.3, 52.3)  | 460 (278, 655)<br>36.6 (22.1, 52.1) | 1238 (736, 1703)<br>31.6 (18.8, 43.5)  | 939 (506, 1336)<br>27.9 (15, 39.7)                       | 2953 (1850, 4036)<br>16.9 (10.6, 23.1)                           | 5536 (3802, 7349)<br>16.2 (11.1, 21.4)  | 12460 (10135, 14639)<br>19.6 (16, 23.1) |                                        |
|                             |                                      | Black                          | <i>N deaths</i><br><i>% OSTK</i>  | 11 (6, 14)<br>64.3 (38, 81.2)      | 5 (3, 7)<br>58.9 (36.4, 74)       | 19 (11, 23)<br>64.7 (41.4, 79.3)    | 15 (9, 21)<br>62.2 (36.3, 77.2)     | 149 (87, 196)<br>50.7 (29.5, 66.6)   | 114 (66, 149)<br>48.7 (28.3, 63.9)   | 320 (182, 435)<br>40.8 (23.2, 55.5)  | 232 (130, 310)<br>40.6 (22.7, 54.1) | 360 (220, 490)<br>33.9 (20.7, 46)      | 296 (178, 401)<br>34.2 (20.6, 46.4)                      | 1871 (1180, 2550)<br>21.5 (14.1, 28.2)                           | 358 (252, 468)<br>16.9 (10.8, 22.6)     | 5536 (3802, 7349)<br>27.4 (23.4, 31.2)  |                                        |
|                             |                                      | Hispanic                       | <i>N deaths</i><br><i>% OSTK</i>  | 3 (2, 4)<br>56.4 (32.9, 71.8)      | 5 (3, 6)<br>60 (34.7, 76.5)       | 20 (12, 25)<br>59.5 (36, 74.7)      | 20 (12, 25)<br>55.3 (32.3, 70.9)    | 48 (26, 65)<br>48 (26.5, 65.3)       | 32 (19, 43)<br>50.2 (29.4, 67.2)     | 97 (56, 130)<br>38.5 (20.2, 52.8)    | 61 (32, 84)<br>35.3 (20.7, 48.8)    | 127 (75, 176)<br>28.6 (14.5, 40.4)     | 127 (75, 176)<br>19.8 (12.2, 27.5)                       | 226 (140, 315)<br>13.9 (12.1, 26.7)                              | 399 (215, 474)<br>19.1 (12.1, 26.7)     | 1048 (880, 1227)<br>25 (21, 29.3)       |                                        |
|                             |                                      | Other                          | <i>N deaths</i><br><i>% OSTK</i>  | 1 (0, 1)<br>65.3 (34.9, 81.3)      | 1 (1, 1)<br>50.8 (28.9, 67.5)     | 5 (3, 7)<br>55.7 (33.7, 72.5)       | 3 (1, 3)<br>50.9 (27.8, 69.7)       | 31 (17, 41)<br>47.8 (27.3, 64.7)     | 15 (6, 21)<br>42.9 (18.6, 62.2)      | 53 (28, 79)<br>38.4 (20, 57.1)       | 26 (12, 42)<br>31.4 (14.9, 49.6)    | 37 (39, 124)<br>32.7 (15.4, 49.1)      | 67 (33, 102)<br>33 (16.4, 50.1)                          | 174 (102, 254)<br>9.5 (3.3, 19.3)                                | 110 (38, 225)<br>56.9 (44.5, 71.1)      | 208 (164, 262)<br>20.7 (17.2, 24)       |                                        |
|                             |                                      | Total                          | <i>N deaths</i><br><i>% OSTK</i>  | 27 (18, 35)<br>58.5 (38.3, 73.9)   | 25 (15, 32)<br>56.9 (35.1, 72)    | 138 (81, 174)<br>59.3 (34.9, 74.9)  | 98 (58, 124)<br>57.5 (33.9, 72.3)   | 457 (259, 610)<br>44.7 (25.3, 59.7)  | 354 (193, 465)<br>37.8 (22, 53)      | 1202 (674, 1625)<br>39.2 (22, 53)    | 774 (457, 1065)<br>37.3 (22, 51.4)  | 1782 (1027, 2438)<br>31.9 (18.4, 43.6) | 1363 (792, 1916)<br>16.9 (16.8, 40.6)                    | 3710 (2423, 5010)<br>17.5 (11.4, 23.4)                           | 6607 (4339, 8718)<br>20.7 (17.2, 24)    |                                         |                                        |
| <b>Fruits</b>               | <b>Cardiometabolic disease</b>       | <b>Overall by age</b>          | <i>N deaths</i>                   | 477 (369, 562)                     | 1847 (1401, 2248)                 | 5161 (3882, 6489)                   | 8906 (6617, 11238)                  | 10542 (8049, 12941)                  | 25567 (20901, 30471)                 |                                      |                                     |                                        |                                                          | <b>M: 28013 (23696, 32512)</b><br><b>F: 24449 (20443, 28647)</b> |                                         |                                         |                                        |
| <b>(&lt;300 g/d)</b>        |                                      | <b>% CMD</b>                   | 13.1 (10.1, 15.4)                 | 14.7 (11.2, 17.9)                  | 12.2 (9.2, 15.3)                  |                                     |                                     |                                      |                                      |                                      |                                     |                                        |                                                          |                                                                  |                                         |                                         |                                        |

**eTable 14. Absolute and proportional cardiometabolic disease mortality associated with suboptimal dietary habits in the US in 2012 by population subgroups (continued)**

| Dietary Factor <sup>a</sup>     | Cardiometabolic Disease <sup>b</sup> | Population strata <sup>c</sup> | Associated mortality <sup>d</sup> | Age                                    |                                                     |                                                   |                                                     |                                                   |                                                       |                                                         |                                                        |                                                       |                                                        |                                                         |                                                                                                                                | Total (25+ y)<br>(95% UIs)                                   |                                                             |
|---------------------------------|--------------------------------------|--------------------------------|-----------------------------------|----------------------------------------|-----------------------------------------------------|---------------------------------------------------|-----------------------------------------------------|---------------------------------------------------|-------------------------------------------------------|---------------------------------------------------------|--------------------------------------------------------|-------------------------------------------------------|--------------------------------------------------------|---------------------------------------------------------|--------------------------------------------------------------------------------------------------------------------------------|--------------------------------------------------------------|-------------------------------------------------------------|
|                                 |                                      |                                |                                   | 25-34 y                                |                                                     | 35-44 y                                           |                                                     | 45-54 y                                           |                                                       | 55-64 y                                                 |                                                        | 65-74 y                                               |                                                        | 75+ y                                                   |                                                                                                                                |                                                              |                                                             |
|                                 |                                      |                                |                                   | Males<br>(95% UIs)                     | Females<br>(95% UIs)                                | Males<br>(95% UIs)                                | Females<br>(95% UIs)                                | Males<br>(95% UIs)                                | Females<br>(95% UIs)                                  | Males<br>(95% UIs)                                      | Females<br>(95% UIs)                                   | Males<br>(95% UIs)                                    | Females<br>(95% UIs)                                   | Males<br>(95% UIs)                                      | Females<br>(95% UIs)                                                                                                           |                                                              |                                                             |
|                                 |                                      | Hispanic                       | <i>N deaths</i><br><i>% CMD</i>   | 45 (32, 56)<br>13.9 (9.8, 17.2)        | 27 (19, 32)<br>19.5 (13.7, 23.5)                    | 169 (119, 209)<br>16.9 (11.9, 21)                 | 67 (49, 81)<br>18.1 (13.1, 21.8)                    | 335 (226, 441)<br>13.4 (9, 17.6)                  | 175 (121, 219)<br>16.5 (11.5, 20.7)                   | 473 (316, 614)<br>11.3 (7.5, 14.6)                      | 225 (162, 289)<br>10.7 (7.7, 13.8)                     | 456 (293, 601)<br>6.6 (4.3, 8.2)                      | 261 (186, 337)<br>8.5 (6.1, 11)                        | 615 (437, 792)<br>6.3 (4.5, 8.1)                        | 841 (628, 1073)<br>8.8 (7.9, 9.7)                                                                                              | 3688 (3288, 4055)<br>8.2 (7.1, 9.3)                          |                                                             |
|                                 |                                      | Other                          | <i>N deaths</i><br><i>% CMD</i>   | 19 (14, 25)<br>14.7 (10.4, 18.6)       | 12 (8, 15)<br>16 (10.4, 19.9)                       | 65 (43, 86)<br>14.3 (9.4, 19.1)                   | 36 (22, 47)<br>21.3 (12.9, 27.4)                    | 169 (115, 226)<br>15.9 (10.4, 20.7)               | 76 (49, 99)<br>11 (7.2, 15.2)                         | 237 (155, 328)<br>10.3 (6.8, 14)                        | 111 (73, 151)<br>10.3 (6.8, 14)                        | 254 (164, 356)<br>6.6 (4.5, 8.2)                      | 186 (131, 242)<br>7.8 (5.4, 10)                        | 433 (310, 569)<br>3.8 (2.7, 4.4)                        | 253 (145, 399)<br>3.6 (2.5, 4.7)                                                                                               | 1857 (1605, 2116)<br>3.6 (2.7, 4.4)                          | 8.2 (7.1, 9.3)                                              |
|                                 |                                      | <b>Total</b>                   | <i>N deaths</i><br><i>% CMD</i>   | 303 (204, 376)<br>12.6 (8.5, 15.6)     | 175 (124, 211)<br>14.1 (10, 17)                     | 1212 (797, 1578)<br>14.3 (9.4, 18.6)              | 640 (458, 798)<br>15.7 (11.2, 19.6)                 | 3321 (2093, 4477)<br>11.5 (7.2, 15.4)             | 1877 (1310, 2423)<br>14.1 (9.8, 18.2)                 | 5974 (3765, 8094)<br>10.2 (6.5, 13.9)                   | 2964 (2068, 3783)<br>10.7 (7.4, 13.6)                  | 6533 (4254, 8850)<br>9.2 (6, 12.5)                    | 3958 (2738, 5138)<br>8.9 (6.2, 11.6)                   | 10778 (7790, 13528)<br>5.7 (4.1, 7.1)                   | 14846 (11185, 18748)<br>5.9 (4.4, 7.4)                                                                                         | <b>52547 (46557, 58706)</b><br><b>7.5 (6.6, 8.4)</b>         |                                                             |
| <b>Vegetables (&lt;400 g/d)</b> | <b>Coronary heart disease</b>        | <b>Overall by age</b>          | <i>N deaths</i><br><i>% CHD</i>   | 162 (90, 232)<br>15.8 (8.8, 22.7)      | 755 (434, 1064)<br>14.6 (8.4, 20.5)                 | 2618 (1428, 3710)<br>11.9 (6.5, 16.9)             | 4825 (2801, 6736)<br>10.1 (5.9, 14.1)               | 5115 (3015, 7351)<br>8.1 (4.8, 11.7)              | 12137 (7852, 16115)<br>5.2 (3.4, 6.9)                 |                                                         |                                                        |                                                       |                                                        |                                                         | <b>M: 15444 (11093, 19530)</b><br><b>F: 10072 (6626, 13350)</b><br><b>M: 7.5 (5.4, 9.5)</b><br><b>F: 6.1 (4, 8.1)</b>          |                                                              |                                                             |
|                                 |                                      | <b>Education</b>               | <i>N deaths</i><br><i>% CHD</i>   | <High-school<br>High-school<br>College | 30 (13, 46)<br>17.6 (7.6, 27.2)<br>16.8 (7.3, 25.4) | 9 (4, 14)<br>15.7 (7.4, 24.5)<br>16.4 (7.9, 24.1) | 104 (49, 160)<br>14.2 (6.7, 21.8)<br>16.5 (7.4, 25) | 47 (22, 70)<br>16 (7.4, 24)<br>15.4 (6.5, 22.8)   | 446 (177, 672)<br>14 (5.6, 21)<br>15.4 (6.5, 22.8)    | 149 (59, 226)<br>12.6 (5, 19)<br>11.3 (4.7, 17.2)       | 716 (325, 1094)<br>11.9 (5.4, 18.3)<br>9.6 (3.7, 15)   | 241 (98, 385)<br>9.9 (4, 15.8)<br>8.6 (3.9, 13.5)     | 878 (389, 1325)<br>9.9 (4.4, 14.9)<br>7.8 (3.4, 12.1)  | 406 (170, 622)<br>8.5 (3.5, 13)<br>5.5 (3, 8.3)         | 1361 (740, 2023)<br>5 (2.7, 7.4)<br>3163 (1744, 4807)                                                                          | 1892 (1037, 2847)<br>5.5 (3, 8.3)<br>3750 (1970, 5517)       | 6301 (5032, 7540)<br>7 (5.6, 8.4)<br>16022 (12854, 19184)   |
| <b>Vegetables (&lt;400 g/d)</b> | <b>Stroke, total</b>                 | <b>Overall by age</b>          | <i>N deaths</i><br><i>% TSTK</i>  | 251 (157, 322)<br>46.9 (29.4, 60.1)    | 762 (501, 972)<br>44.1 (28.9, 56.2)                 | 2036 (1362, 2632)<br>36 (24.1, 46.5)              | 3568 (2465, 4500)<br>32.2 (22.3, 40.6)              | 4837 (3539, 6108)<br>26.6 (19.5, 33.6)            | 16622 (12645, 20235)<br>18.2 (13.9, 22.2)             |                                                         |                                                        |                                                       |                                                        |                                                         | <b>M: 12439 (10057, 14594)</b><br><b>F: 15659 (11844, 18836)</b><br><b>M: 23.7 (19.2, 27.8)</b><br><b>F: 20.6 (15.6, 24.8)</b> |                                                              |                                                             |
|                                 |                                      | <b>Education</b>               | <i>N deaths</i><br><i>% TSTK</i>  | <High-school<br>High-school<br>College | 32 (15, 43)<br>51.3 (23.8, 69.8)<br>100 (45, 134)   | 21 (10, 29)<br>47.7 (21.7, 65)<br>73 (34, 99)     | 98 (43, 135)<br>44.2 (19.5, 60.9)<br>301 (144, 393) | 75 (39, 101)<br>47.9 (25, 64.3)<br>218 (103, 287) | 316 (176, 416)<br>42.4 (23.6, 55.7)<br>404 (325, 882) | 193 (101, 262)<br>39.5 (20.7, 53.7)<br>1483 (845, 2067) | 487 (297, 646)<br>37.1 (22.6, 49.2)<br>975 (531, 1318) | 283 (168, 389)<br>32.5 (19, 44.6)<br>1399 (835, 1881) | 697 (448, 932)<br>31.5 (20.3, 42.2)<br>975 (531, 1318) | 538 (335, 720)<br>17.8 (17.3, 37.2)<br>1424 (834, 1927) | 1448 (943, 1936)<br>17.6 (11.5, 23.5)<br>3121 (2065, 4080)                                                                     | 2989 (2048, 3868)<br>19.3 (13.2, 25)<br>16857 (14252, 19316) | 7160 (5949, 8290)<br>22.5 (18.7, 26.1)<br>19.1 (12.1, 23.1) |
| <b>Vegetables (&lt;400 g/d)</b> | <b>Ischemic Stroke</b>               | <b>Overall by age</b>          | <i>N deaths</i><br><i>% ISTK</i>  | 31 (20, 39)<br>47.1 (30.8, 59.9)       | 77 (49, 100)<br>44 (28, 57.4)                       | 217 (130, 284)<br>36.8 (22, 48.2)                 | 394 (229, 528)<br>32.8 (19.1, 44.1)                 | 553 (324, 756)<br>26.7 (15.6, 36.5)               | 2204 (1376, 2915)<br>18.3 (11.4, 24.2)                |                                                         |                                                        |                                                       |                                                        |                                                         | <b>M: 1480 (1053, 1879)</b><br><b>F: 1989 (1233, 2669)</b><br><b>M: 23.1 (16.4, 29.3)</b><br><b>F: 20.5 (12.7, 27.5)</b>       |                                                              |                                                             |
|                                 |                                      | <b>Education</b>               | <i>N deaths</i><br><i>% ISTK</i>  | <High-school<br>High-school<br>College | 2 (1, 3)<br>51.4 (25.4, 68.2)<br>11 (6, 16)         | 2 (1, 3)<br>47.3 (17.8, 66.2)<br>8 (4, 11)        | 9 (4, 12)<br>44.5 (19.7, 61.8)<br>32 (14, 43)       | 4 (2, 5)<br>4.9 (24.5, 65.6)<br>22 (11, 29)       | 30 (15, 42)<br>42.8 (21.9, 60.8)<br>96 (45, 137)      | 19 (9, 27)<br>39.3 (18.5, 57)<br>59 (25, 85)            | 59 (30, 83)<br>37.7 (19.4, 53.3)<br>159 (67, 232)      | 36 (14, 53)<br>32.9 (13.1, 48.2)<br>89 (39, 131)      | 87 (37, 129)<br>32 (13.5, 47.4)<br>165 (73, 250)       | 70 (32, 105)<br>27.8 (12.6, 41.6)<br>154 (58, 234)      | 194 (94, 291)<br>19.5 (10.6, 28.4)<br>390 (199, 570)                                                                           | 416 (226, 606)<br>22 (16.7, 27.4)<br>870 (441, 1281)         | 922 (697, 1148)<br>22 (16.7, 27.4)<br>2044 (1550, 2510)     |

**eTable 14. Absolute and proportional cardiometabolic disease mortality associated with suboptimal dietary habits in the US in 2012 by population subgroups (continued)**

| Dietary Factor <sup>a</sup> | Cardiometabolic Disease <sup>b</sup> | Population strata <sup>c</sup> | Associated mortality <sup>d</sup>                 | Age                                         |                                                    |                                                       |                                                       |                                                       |                                                     |                                                    |                                                      |                                                         |                                                   |                                                          |                                                           | Total (25+ y) (95% UIs)                                                                                                   |
|-----------------------------|--------------------------------------|--------------------------------|---------------------------------------------------|---------------------------------------------|----------------------------------------------------|-------------------------------------------------------|-------------------------------------------------------|-------------------------------------------------------|-----------------------------------------------------|----------------------------------------------------|------------------------------------------------------|---------------------------------------------------------|---------------------------------------------------|----------------------------------------------------------|-----------------------------------------------------------|---------------------------------------------------------------------------------------------------------------------------|
|                             |                                      |                                |                                                   | 25-34 y                                     |                                                    | 35-44 y                                               |                                                       | 45-54 y                                               |                                                     | 55-64 y                                            |                                                      | 65-74 y                                                 |                                                   | 75+ y                                                    |                                                           |                                                                                                                           |
|                             |                                      |                                |                                                   | Males (95% UIs)                             | Females (95% UIs)                                  | Males (95% UIs)                                       | Females (95% UIs)                                     | Males (95% UIs)                                       | Females (95% UIs)                                   | Males (95% UIs)                                    | Females (95% UIs)                                    | Males (95% UIs)                                         | Females (95% UIs)                                 | Males (95% UIs)                                          | Females (95% UIs)                                         |                                                                                                                           |
|                             |                                      | Other                          | % <i>ISTK</i><br><i>N deaths</i>                  | 43.7 (19.7, 61.8)<br>0 (0, 0)               | 44.7 (20.1, 62.2)<br>1 (0, 2)                      | 41.7 (19.3, 57.8)<br>2 (1, 3)                         | 42.2 (18.8, 59.3)<br>3 (1, 4)                         | 38.3 (18.1, 54)<br>5 (2, 8)                           | 37.2 (16.8, 53.2)<br>2 (1, 3)                       | 30.9 (12.4, 44.7)<br>8 (3, 12)                     | 30.1 (13.5, 44.9)<br>5 (2, 7)                        | 26.4 (11.7, 40.1)<br>8 (3, 13)                          | 24.1 (10.7, 37.3)<br>8 (3, 13)                    | 16 (7.1, 25.8)<br>14 (6, 23)                             | 14.8 (7, 22.7)<br>15 (9, 39)                              | 20.5 (16.1, 25.1)<br>72 (55, 95)                                                                                          |
|                             |                                      | <b>Total</b>                   | % <i>ISTK</i><br><i>N deaths</i><br>% <i>ISTK</i> | 0 (0, 0)<br>16 (8, 21)<br>48.5 (23.6, 64.3) | 36.8 (15.9, 55.3)<br>15 (8, 22)<br>47 (24.2, 65.5) | 33.1 (13.8, 55.2)<br>42 (21, 59)<br>44.3 (22.3, 62.6) | 36.2 (16.1, 54.8)<br>35 (17, 50)<br>44.4 (21.1, 62.2) | 29.8 (12.1, 47.8)<br>138 (64, 192)<br>39 (18.1, 54.4) | 30.9 (13, 47.4)<br>137 (64, 192)<br>34.3 (14.7, 49) | 32.4 (13, 50.3)<br>81 (35, 116)<br>34.6 (15, 49.6) | 21.7 (8, 35.3)<br>137 (68, 201)<br>30.1 (14.8, 44.2) | 25.5 (8.7, 39.8)<br>304 (120, 450)<br>27.5 (10.8, 40.8) | 24 (9.5, 40)<br>251 (101, 378)<br>25.9 (10.5, 39) | 14.5 (6.6, 23.9)<br>1467 (719, 2124)<br>18.2 (9.4, 26.8) | 10.6 (2.9, 22.1)<br>3466 (2567, 4208)<br>18.5 (9.1, 26.8) | 17.4 (13.2, 22.8)<br>20.5 (16.1, 25.1)<br>21.5 (15.9, 26.1)                                                               |
| <b>Vegetables</b>           | <b>Hemorrhagic Stroke</b>            | <b>Overall by age</b>          | <i>N deaths</i>                                   | 178 (89, 245)                               |                                                    | 507 (261, 703)                                        |                                                       | 1178 (547, 1683)                                      |                                                     | 1515 (711, 2177)                                   |                                                      | 1547 (674, 2261)                                        |                                                   | 3128 (1695, 4494)                                        |                                                           | <b>M: 3967 (2643, 5121)</b><br><b>F: 4087 (2564, 5430)</b><br><b>M: 26.6 (17.7, 34.4)</b><br><b>F: 23.1 (14.5, 30.7)</b>  |
| <b>(&lt;400 g/d)</b>        |                                      |                                | % <i>HSTK</i>                                     | 46.8 (23.4, 64.7)                           |                                                    | 44 (22.7, 61.1)                                       |                                                       | 35.7 (16.6, 51)                                       |                                                     | 32 (15, 46)                                        |                                                      | 26.7 (11.6, 39)                                         |                                                   | 18.2 (9.8, 26.1)                                         |                                                           |                                                                                                                           |
|                             |                                      | <b>Education</b>               |                                                   |                                             |                                                    |                                                       |                                                       |                                                       |                                                     |                                                    |                                                      |                                                         |                                                   |                                                          |                                                           |                                                                                                                           |
|                             |                                      | <High-school                   | <i>N deaths</i><br>% <i>HSTK</i>                  | 24 (8, 35)<br>51.6 (16.9, 74.6)             | 16 (4, 24)<br>48.2 (12.7, 70)                      | 71 (19, 106)<br>44.6 (11.7, 65.9)                     | 51 (16, 74)<br>48.8 (15.5, 70.1)                      | 182 (43, 259)<br>43.7 (10.4, 62.4)                    | 109 (23, 163)<br>40.2 (8.5, 60.4)                   | 183 (41, 289)<br>36.9 (8.2, 58.2)                  | 113 (28, 176)<br>32.9 (8, 50.9)                      | 180 (36, 278)<br>46.5 (10.2, 75)                        | 148 (42, 232)<br>49.5 (10.9, 78.9)                | 256 (83, 426)<br>17.4 (5.6, 29)                          | 484 (183, 765)<br>114.4 (41.3, 1800)                      | 1775 (1339, 2185)<br>25.8 (19.5, 31.8)                                                                                    |
|                             |                                      | High-school                    | <i>N deaths</i><br>% <i>HSTK</i>                  | 74 (19, 105)<br>50.6 (13.2, 71.5)           | 51 (11, 74)<br>48.5 (10.2, 70.7)                   | 192 (46, 269)<br>50 (12.1, 70)                        | 149 (39, 214)<br>46.4 (12.1, 66.8)                    | 450 (116, 885)<br>41.9 (12.8, 62.4)                   | 414 (124, 626)<br>38.1 (11.5, 57.7)                 | 576 (116, 885)<br>35.5 (7.2, 54.6)                 | 455 (105, 705)<br>32.2 (7.4, 49.8)                   | 465 (102, 759)<br>27.9 (6.1, 45.6)                      | 495 (109, 789)<br>26.5 (5.9, 42.3)                | 703 (251, 1124)<br>19.5 (7, 31.2)                        | 1144 (413, 1800)<br>17.8 (6.4, 28)                        | 5065 (3903, 6193)<br>25.7 (19.8, 31.4)                                                                                    |
|                             |                                      | College                        | <i>N deaths</i><br>% <i>HSTK</i>                  | 10 (2, 15)<br>42.6 (10.6, 64.4)             | 8 (2, 12)<br>43.4 (10.5, 65.5)                     | 32 (9, 50)<br>37.5 (10.8, 58.7)                       | 35 (9, 54)<br>40.7 (10.2, 63.7)                       | 59 (12, 102)<br>30.4 (6.1, 52.4)                      | 48 (12, 83)<br>24.2 (6, 41.7)                       | 126 (31, 198)<br>30.9 (7.5, 48.7)                  | 90 (21, 144)<br>26.6 (6, 42.7)                       | 99 (25, 168)<br>23.7 (6.3, 40.5)                        | 99 (25, 168)<br>22 (5.7, 37.5)                    | 297 (100, 480)<br>18.2 (6.1, 29.4)                       | 234 (83, 382)<br>11.70 (8.58, 1462)                       | 1170 (858, 1427)<br>12.6 (6.1, 28.8)                                                                                      |
|                             |                                      | <b>Race</b>                    |                                                   |                                             |                                                    |                                                       |                                                       |                                                       |                                                     |                                                    |                                                      |                                                         |                                                   |                                                          |                                                           |                                                                                                                           |
|                             |                                      | White                          | <i>N deaths</i><br>% <i>HSTK</i>                  | 52 (14, 75)<br>47.6 (12.5, 68.8)            | 42 (12, 60)<br>49.4 (13.7, 70.2)                   | 134 (39, 198)<br>46.7 (13.5, 68.7)                    | 117 (35, 175)<br>44.9 (13.4, 67.4)                    | 353 (92, 532)<br>43.7 (10.4, 62.4)                    | 283 (40, 455)<br>33.9 (4.8, 54.5)                   | 540 (122, 833)<br>34.4 (7.8, 53.1)                 | 398 (91, 645)<br>30.2 (6.9, 48.9)                    | 613 (164, 950)<br>46.5 (10.2, 75)                       | 528 (135, 895)<br>117 (35, 180)                   | 1059 (442, 1682)<br>159 (54, 254)                        | 1593 (590, 2546)<br>18.5 (7.7, 29.4)                      | 5659 (4166, 6970)<br>23.7 (17.4, 29.2)                                                                                    |
|                             |                                      | Black                          | <i>N deaths</i><br>% <i>HSTK</i>                  | 25 (9, 35)<br>56 (19.9, 77.8)               | 17 (5, 25)<br>51.5 (14.3, 74.6)                    | 79 (17, 114)<br>49.1 (10.5, 70.8)                     | 68 (19, 97)<br>50.7 (13.8, 71.9)                      | 215 (61, 315)<br>44.1 (12.6, 64.8)                    | 202 (49, 303)<br>43.5 (10.5, 65.2)                  | 223 (56, 331)<br>38.5 (9.7, 57.1)                  | 166 (37, 257)<br>34.3 (7.6, 53.3)                    | 117 (35, 180)<br>33 (9.8, 50.9)                         | 1425 (105, 179)                                   | 26.4 (6.3, 45.1)<br>19.2 (6.2, 30.4)                     | 19.5 (6.7, 31.2)                                          | 32.5 (25.7, 38.7)                                                                                                         |
|                             |                                      | Hispanic                       | <i>N deaths</i><br>% <i>HSTK</i>                  | 21 (5, 31)<br>45 (10.7, 66.5)               | 13 (3, 18)<br>45.4 (9.8, 66.1)                     | 58 (18, 86)<br>41.6 (13.61, 7)                        | 32 (9, 47)<br>42.4 (11.9, 62.5)                       | 105 (22, 155)<br>30.4 (6.1, 52.4)                     | 67 (14, 101)<br>37.3 (8, 56.4)                      | 89 (18, 144)<br>30.4 (6.1, 49.1)                   | 55 (11, 87)<br>30 (6.2, 48)                          | 53 (15, 86)<br>26.7 (7.5, 43.2)                         | 58 (6, 101)<br>23.7 (2.6, 41.1)                   | 60 (20, 100)<br>14.8 (4.3, 26.1)                         | 81 (25, 136)<br>10.9 (1.8, 23.2)                          | 678 (535, 817)<br>37.2 (27.7, 47.1)                                                                                       |
|                             |                                      | Other                          | <i>N deaths</i><br>% <i>HSTK</i>                  | 8 (2, 11)<br>44.4 (11.1, 66.9)              | 5 (1, 9)<br>36.1 (9.1, 57.9)                       | 15 (2, 26)<br>33.2 (4.4, 57.4)                        | 17 (5, 28)<br>37.1 (10.6, 59)                         | 33 (4, 57)<br>29.6 (3.7, 51.2)                        | 30 (9, 50)<br>30.2 (8.8, 50.9)                      | 52 (13, 89)<br>32.2 (8.5, 55.1)                    | 31 (7, 58)<br>21.2 (4.5, 39.5)                       | 45 (8, 78)<br>25.5 (4.3, 43.6)                          | 38 (7, 69)<br>14.8 (4.3, 26.1)                    | 47 (13, 82)<br>50 (8, 106)                               | 10.9 (1.8, 23.2)                                          | 21.2 (15.8, 26.8)                                                                                                         |
|                             |                                      | <b>Total</b>                   | <i>N deaths</i><br>% <i>HSTK</i>                  | 104 (33, 154)<br>47.9 (15.3, 70.6)          | 78 (19, 108)<br>48.1 (11.7, 67.2)                  | 288 (72, 420)<br>45.4 (11.4, 66.1)                    | 231 (71, 339)<br>44.6 (13.8, 65.5)                    | 657 (159, 1014)<br>38.1 (9.2, 58.8)                   | 542 (111, 862)<br>34.3 (7, 54.6)                    | 905 (216, 1397)<br>34.8 (8.3, 53.7)                | 626 (133, 1046)<br>29.4 (6.2, 49)                    | 824 (176, 1278)<br>28.4 (6.1, 44)                       | 742 (141, 1196)<br>18.4 (4.9, 41.4)               | 1254 (482, 1976)<br>18.4 (4.9, 41.4)                     | 1929 (667, 2981)<br>24.7 (7.1, 29)                        | <b>8041 (5987, 9897)</b><br><b>24.7 (18.4, 30.4)</b>                                                                      |
| <b>Vegetables</b>           | <b>Other Stroke</b>                  | <b>Overall by age</b>          | <i>N deaths</i>                                   | 43 (26, 56)                                 |                                                    | 179 (99, 237)                                         |                                                       | 646 (377, 880)                                        |                                                     | 1673 (964, 2279)                                   |                                                      | 2762 (1710, 3729)                                       |                                                   | 11300 (7573, 14487)                                      |                                                           | <b>M: 7020 (4899, 8957)</b><br><b>F: 9664 (6269, 12362)</b><br><b>M: 22.5 (15.7, 28.8)</b><br><b>F: 19.9 (12.9, 25.5)</b> |
| <b>(&lt;400 g/d)</b>        |                                      |                                | % <i>OSTK</i>                                     | 47.7 (28.7, 61.4)                           |                                                    | 44.3 (24.7, 58.9)                                     |                                                       | 36.6 (21.4, 49.9)                                     |                                                     | 32.6 (18.8, 44.4)                                  |                                                      | 26.8 (16.6, 36.2)                                       |                                                   | 18.3 (12.2, 23.4)                                        |                                                           |                                                                                                                           |
|                             |                                      | <b>Education</b>               |                                                   |                                             |                                                    |                                                       |                                                       |                                                       |                                                     |                                                    |                                                      |                                                         |                                                   |                                                          |                                                           |                                                                                                                           |
|                             |                                      | <High-school                   | <i>N deaths</i><br>% <i>OSTK</i>                  | 6 (2, 8)<br>52.3 (15.9, 73.3)               | 3 (1, 4)<br>47.5 (19.2, 66.6)                      | 18 (7, 26)<br>43.9 (17.2, 64.1)                       | 21 (8, 30)<br>47.4 (18.4, 68.1)                       | 112 (52, 161)<br>42.9 (19.9, 61.3)                    | 68 (22, 101)<br>40.1 (13.2, 59.3)                   | 247 (111, 356)<br>37.3 (16.7, 53.7)                | 136 (57, 209)<br>32.7 (13.6, 50.1)                   | 436 (236, 626)<br>31.4 (17, 45.1)                       | 323 (159, 464)<br>27.9 (13.8, 40.2)               | 1002 (557, 1415)<br>17.7 (9.8, 25)                       | 2099 (1225, 2930)<br>19.3 (11.3, 27)                      | 4455 (3419, 5429)<br>21.5 (16.5, 26.2)                                                                                    |
|                             |                                      | High-school                    | <i>N deaths</i><br>% <i>OSTK</i>                  | 16 (5, 21)<br>50.4 (11.6, 69.3)             | 15 (6, 20)<br>49.5 (19.7, 67.5)                    | 81 (37, 112)<br>49.4 (22.3, 68.2)                     | 48 (21, 69)<br>46.2 (19.9, 65.7)                      | 269 (107, 394)<br>37.9 (15.5, 55)                     | 185 (75, 268)<br>35.4 (14.8, 51.6)                  | 668 (279, 974)<br>31.9 (11.5, 47.5)                | 440 (159, 655)<br>32.5 (4.2, 42.6)                   | 878 (345, 1337)<br>25.5 (4.3, 43.6)                     | 790 (324, 1180)<br>14.8 (4.3, 26.1)               | 2036 (1142, 2874)<br>19.2 (10.6, 24.5)                   | 4448 (2580, 5976)<br>17.1 (9.3, 25.2)                     | 9784 (7515, 11835)<br>19.2 (14.4, 23.7)                                                                                   |
|                             |                                      | College                        | <i>N deaths</i><br>% <i>OSTK</i>                  | 2 (1, 3)<br>43.3 (18.6, 63)                 | 3 (2, 4)<br>43.7 (22.1, 59.2)                      | 7 (2, 11)<br>37.1 (10.7, 58.3)                        | 9 (4, 12)<br>41.6 (17, 59.1)                          | 30 (11, 47)<br>30.9 (11.6, 48.4)                      | 16 (5, 27)<br>23.8 (7.8, 41.2)                      | 128 (47, 186)<br>30.8 (11.4, 44.7)                 | 63 (23, 101)<br>26.1 (9.8, 42.1)                     | 214 (84, 332)<br>24.1 (9.5, 37.4)                       | 122 (42, 191)<br>22.2 (7.7, 34.8)                 | 795 (442, 1139)<br>18 (10, 25.8)                         | 812 (439, 1191)<br>17.1 (9.3, 25.2)                       | 2196 (1650, 2712)<br>19.2 (14.4, 23.7)                                                                                    |
|                             |                                      | <b>Race</b>                    |                                                   |                                             |                                                    |                                                       |                                                       |                                                       |                                                     |                                                    |                                                      |                                                         |                                                   |                                                          |                                                           |                                                                                                                           |
|                             |                                      | White                          | <i>N deaths</i><br>% <i>OSTK</i>                  | 11 (5, 15)<br>48.7 (20.1, 66.5)             | 12 (4, 17)<br>47.8 (16.7, 66.9)                    | 53 (22, 72)<br>47.4 (20.1, 65.2)                      | 43 (19, 61)<br>45.2 (19.8, 64.5)                      | 231 (85, 341)<br>40.9 (14.9, 60.2)                    | 141 (57, 218)<br>34.8 (14.4, 53.4)                  | 665 (277, 953)<br>30.4 (13.0, 43.6)                | 383 (131, 588)<br>196 (84, 288)                      | 1093 (466, 1646)<br>353 (171, 490)                      | 873 (345, 1314)<br>232 (115, 344)                 | 3285 (1805, 4714)<br>345 (199, 486)                      | 6503 (3795, 8912)<br>690 (411, 938)                       | 13279 (9946, 16127)<br>2395 (1947, 2789)                                                                                  |
|                             |                                      | Black                          | <i>N deaths</i><br>% <i>OSTK</i>                  | 56 (23.8, 74.6)<br>3 (1, 4)                 | 52.3 (24.8, 69.9)<br>4 (1, 5)                      | 50.2 (18, 70)<br>14 (5, 21)                           | 51 (19.4, 71.4)<br>6 (2, 9)                           | 43.3 (16.5, 61.9)<br>38 (11, 56)                      | 42.3 (14.8, 62.7)<br>24 (8, 36)                     | 38.7 (16.6, 55.6)<br>70 (29, 107)                  | 34.3 (14.8, 50.4)<br>49 (18, 75)                     | 33.2 (16.1, 46.1)<br>98 (39, 145)                       | 26.8 (11.2, 39.7)<br>68 (27, 108)                 | 19.3 (11.2, 27.2)<br>185 (96, 303)                       | 26.9 (11.2, 42.6)<br>263 (142, 398)                       | 15.8 (8, 22.4)<br>12.4 (6.2, 19.2)                                                                                        |
|                             |                                      | Hispanic                       | <i>N deaths</i><br>% <i>OSTK</i>                  | 44.3 (17.2, 63.8)<br>0 (0, 1)               | 45.4 (13.2, 65.6)<br>1 (0, 1)                      | 41.3 (13.3, 60.4)<br>3 (1, 5)                         | 42.1 (12.4, 62.1)<br>2 (1, 3)                         | 38.1 (11.2, 56.8)<br>19 (6, 30)                       | 37.3 (12.2, 56.2)<br>11 (3, 16)                     | 30.2 (12.3, 45.7)<br>45 (15, 71)                   | 30.6 (11.6, 47.3)<br>18 (5, 32)                      | 27.2 (10.8, 40.3)<br>66 (24, 105)                       | 23.8 (9.4, 37.5)<br>48 (15, 83)                   | 16.2 (8.4, 26.5)<br>113 (52, 186)                        | 14.8 (6.9, 24.4)<br>10.8 (2.7, 22)                        |                                                                                                                           |
|                             |                                      | Other                          | <i>N deaths</i><br>% <i>OSTK</i>                  | 45 (14.2, 66.5)<br>23 (8, 32)               | 36.4 (14.6, 57.1)<br>21 (10, 29)                   | 33.1 (11.3, 53.3)<br>105 (36, 148)                    | 36.4 (10.6, 55.9)<br>77 (30, 110)                     | 29.2 (9.5, 47.5)<br>395 (171, 581)                    | 31 (8.7, 48.4)<br>259 (97, 381)                     | 32.7 (10.8, 50.9)<br>1050 (467, 1570)              | 21.2 (5.9, 38.5)<br>614 (240, 942)                   | 26.1 (9.7, 41.6)<br>1562 (744, 2327)                    | 23.7 (7.6, 40.7)<br>1206 (518, 1812)              | 14.8 (6.9, 24.4)<br>3869 (2124, 5632)                    | 10.8 (2.7, 22)<br>7470 (4140, 10212)                      |                                                                                                                           |
|                             |                                      | <b>Total</b>                   | <i>N deaths</i><br>% <i>OSTK</i>                  | 23 (8, 32)<br>48.7 (17.7, 68)               | 21 (10, 29)<br>47.2 (22.5, 65.8)                   | 105 (36, 148)<br>45.2 (15.3, 63.9)                    | 77 (30, 110)<br>44.8 (17.5, 64.6)                     | 395 (171, 581)<br>38.6 (16.7, 56.8)                   | 259 (97, 381)<br>35 (13.1, 51.5)                    | 1050 (467, 1570)<br>34.2 (15.2, 51.2)              | 614 (240, 942)<br>29.6 (11.6, 45.4)                  | 1562 (744, 2327)<br>27.9 (13.3, 41.6)                   | 1206 (518, 1812)<br>25.5 (11, 38.4)               | 3869 (2124, 5632)<br>18.3 (10, 26.6)                     | 7470 (4140, 10212)<br>18.4 (10.2, 25.1)                   | <b>16584 (12721, 20123)</b><br><b>20.8 (16, 25.3)</b>                                                                     |
| <b>Vegetables</b>           | <b>Cardiometabolic disease</b>       | <b>Overall by age</b>          | <i>N deaths</i>                                   | 412 (299, 514)                              |                                                    | 1512 (1101, 1870)                                     |                                                       | 4620 (3231, 5941)                                     |                                                     | 8363 (6037, 10467)                                 |                                                      | 9911 (7377, 12553)                                      |                                                   | 28634 (22832, 34184)                                     |                                                           | <b>M: 27942 (23230, 32589)</b><br><b>F: 25592 (20524, 30250)</b><br><b>M: 7.8 (6.5, 9.1)</b><br><b>F: 7.4 (6, 8.8)</b>    |
| <b>(&lt;400 g/d)</b>        |                                      |                                | % <i>CMD</i>                                      | 11.3 (8.2, 14.1)                            |                                                    | 12.1 (8.8, 14.9)                                      |                                                       | 10.9 (7.6, 14)                                        |                                                     | 9.7 (7, 12.2)                                      |                                                      | 8.6 (6.4, 10.9)                                         |                                                   | 6.5 (5.2, 7.7)                                           |                                                           |                                                                                                                           |
|                             |                                      | <b>Education</b>               |                                                   |                                             |                                                    |                                                       |                                                       |                                                       |                                                     |                                                    |                                                      |                                                         |                                                   |                                                          |                                                           |                                                                                                                           |
|                             |                                      | <High-school                   | <i>N deaths</i><br>% <i>CMD</i>                   | 61 (38, 82)<br>11.6 (7.3, 15.6)             | 30 (17, 39)<br>12 (7, 15.7)                        | 200 (122, 273)<br>12.1 (7.4, 16.5)                    | 121 (77, 156)<br>14.8 (9.4, 19.2)                     | 755 (459, 1013)<br>13.1 (8, 17.6)                     | 337 (214, 450)<br>12.8 (8.1, 17.1)                  | 1191 (778, 1614)<br>11.7 (7.6, 15.8)               | 523 (341, 691)<br>10.2 (6.6, 13.5)                   | 1580 (1001, 2080)<br>10.3 (6.5, 13.5)                   | 942 (634, 1246)<br>24.73 (1638, 3272)             | 2806 (1988, 3635)<br>5.9 (4.2, 7.6)                      | 4936 (3554, 6166)<br>7.1 (5.1, 8.9)                       | 13486 (11661, 15265)<br>8 (6.9, 9)                                                                                        |
|                             |                                      | High-school                    | <i>N deaths</i><br>% <i>CMD</i>                   | 186 (117, 240)<br>11.6 (7.3, 14.9)          | 101 (58, 131)<br>12.4 (7.2, 16.2)                  | 734 (462, 977)<br>12.8 (8, 17)                        | 354 (222, 455)<br>13 (8.2, 16.8)                      | 1089 (681, 1431)<br>11.6 (7.3, 16)                    | 2234 (1410, 3073)<br>12 (7.5, 15.8)                 | 1823 (1148, 2381)<br>10.3 (6.5, 14.1)              | 3826 (2420, 5252)<br>9.9 (6.2, 12.9)                 | 3603 (2283, 4944)<br>8.7 (5.5, 11.9)                    | 6307 (4375, 8204)<br>1834 (1372, 2348)            | 24735 (29024, 37081)<br>6.4 (4.4, 8.3)                   | 32735 (29024, 37081)<br>7.9 (7, 8.9)                      | 32735 (29024, 37081)<br>7.9 (7, 8.9)                                                                                      |
|                             |                                      | College                        | <i>N deaths</i><br>% <i>CMD</i>                   | 24 (14, 32)<br>9.2 (5.5, 12.1)              | 20 (13, 26)<br>12.4 (8, 15.9)                      | 90 (54, 123)<br>9.5 (5.8, 13.1)                       | 68 (40, 9                                             |                                                       |                                                     |                                                    |                                                      |                                                         |                                                   |                                                          |                                                           |                                                                                                                           |



**eTable 14. Absolute and proportional cardiometabolic disease mortality associated with suboptimal dietary habits in the US in 2012 by population subgroups (continued)**

| Dietary Factor <sup>a</sup> | Cardiometabolic Disease <sup>b</sup> | Population strata <sup>c</sup> | Associated mortality <sup>d</sup> | Age                                |                                   |                                      |                                     |                                        |                                                            |                                                                  |                                      |                                         |                                        |                                         |                                         | Total (25+ y) (95% UIs)                                 |
|-----------------------------|--------------------------------------|--------------------------------|-----------------------------------|------------------------------------|-----------------------------------|--------------------------------------|-------------------------------------|----------------------------------------|------------------------------------------------------------|------------------------------------------------------------------|--------------------------------------|-----------------------------------------|----------------------------------------|-----------------------------------------|-----------------------------------------|---------------------------------------------------------|
|                             |                                      |                                |                                   | 25-34 y                            |                                   | 35-44 y                              |                                     | 45-54 y                                |                                                            | 55-64 y                                                          |                                      | 65-74 y                                 |                                        | 75+ y                                   |                                         |                                                         |
|                             |                                      |                                |                                   | Males                              | Females                           | Males                                | Females                             | Males                                  | Females                                                    | Males                                                            | Females                              | Males                                   | Females                                | Males                                   | Females                                 |                                                         |
|                             |                                      |                                |                                   | (95% UIs)                          | (95% UIs)                         | (95% UIs)                            | (95% UIs)                           | (95% UIs)                              | (95% UIs)                                                  | (95% UIs)                                                        | (95% UIs)                            | (95% UIs)                               | (95% UIs)                              | (95% UIs)                               | (95% UIs)                               |                                                         |
|                             |                                      | <b>Total</b>                   | <i>N deaths</i><br>% <i>CMD</i>   | 262 (167, 350)<br>10.9 (6.9, 14.5) | 150 (91, 195)<br>12.1 (7.4, 15.7) | 986 (638, 1313)<br>11.6 (7.5, 15.5)  | 529 (339, 687)<br>13 (8.3, 16.9)    | 3200 (1913, 4313)<br>11 (6.6, 14.9)    | 1441 (942, 1929)<br>10.8 (7.1, 14.5)                       | 5843 (3622, 7900)<br>10 (6.2, 13.5)                              | 2561 (1661, 3401)<br>9.2 (6, 12.2)   | 6127 (3945, 8312)<br>8.6 (5.6, 11.7)    | 3803 (2620, 4967)<br>8.6 (5.9, 11.2)   | 11475 (8215, 14986)<br>6.1 (4.3, 7.9)   | 17206 (12255, 21422)<br>6.8 (4.8, 8.5)  | <b>53410 (46290, 60398)</b><br><b>7.6 (6.6, 8.6)</b>    |
| <b>Nuts/seeds</b>           | <b>Coronary heart disease</b>        | <b>Overall by age</b>          | <i>N deaths</i>                   | 269 (184, 353)                     | 1646 (1193, 2069)                 | 6017 (4210, 7679)                    | 6241 (3892, 9431)                   | 11913 (8639, 15541)                    | 28381 (22163, 36020)                                       | <b>M: 29258 (23562, 35709)</b><br><b>F: 25386 (20011, 31503)</b> |                                      |                                         |                                        |                                         |                                         |                                                         |
| <b>&lt;20.2 g/d</b>         |                                      | % <i>CHD</i>                   | 26.2 (17.9, 34.4)                 | 31.8 (23, 39.9)                    | 27.5 (19.2, 35)                   | 13.1 (8.2, 19.8)                     | 19 (13.8, 24.7)                     | 12.2 (9.5, 15.5)                       | <b>M: 14.2 (11.4, 17.3)</b><br><b>F: 15.4 (12.1, 19.1)</b> |                                                                  |                                      |                                         |                                        |                                         |                                         |                                                         |
|                             |                                      | <b>Education</b>               |                                   |                                    |                                   |                                      |                                     |                                        |                                                            |                                                                  |                                      |                                         |                                        |                                         |                                         |                                                         |
|                             |                                      | <High-school                   | <i>N deaths</i><br>% <i>CHD</i>   | 69 (47, 88)<br>40.9 (28, 52.2)     | 24 (17, 31)<br>42.7 (29.3, 53.8)  | 278 (189, 363)<br>37.9 (25.8, 49.4)  | 102 (68, 136)<br>34.9 (23, 46.3)    | 1098 (695, 1431)<br>34.4 (21.8, 44.8)  | 373 (248, 502)<br>31.5 (21, 42.4)                          | 1480 (928, 2096)<br>24.7 (15.5, 35)                              | 586 (348, 857)<br>24.1 (14.3, 35.2)  | 2186 (1456, 2900)<br>24.6 (16.4, 32.6)  | 1107 (711, 1518)<br>23.1 (14.8, 31.6)  | 3681 (2456, 4974)<br>13.5 (9, 18.2)     | 5518 (3624, 7148)<br>16 (10.5, 20.8)    | 16480 (13855, 18902)<br>18.4 (15.5, 21.1)               |
|                             |                                      | High-school                    | <i>N deaths</i><br>% <i>CHD</i>   | 180 (117, 240)<br>35 (22.9, 46.7)  | 63 (43, 82)<br>37.1 (25, 48.3)    | 805 (529, 1073)<br>30.6 (20.1, 40.7) | 340 (213, 454)<br>37.5 (23.6, 50.2) | 3034 (1964, 4145)<br>27.8 (18, 37.9)   | 722 (415, 1083)<br>19.3 (11.1, 29)                         | 4478 (2721, 6692)<br>20.3 (12.3, 30.3)                           | 1509 (846, 2192)<br>17.3 (9.7, 25.1) | 4703 (3008, 6397)<br>19.1 (12.2, 26)    | 1674 (876, 2692)<br>12.3 (6.5, 19.9)   | 5984 (4073, 8205)<br>10.3 (7, 14.2)     | 8014 (5416, 10969)<br>10.8 (7.3, 14.8)  | 31816 (26748, 36560)<br>14.5 (12.2, 16.6)               |
|                             |                                      | College                        | <i>N deaths</i><br>% <i>CHD</i>   | 10 (2, 23)<br>12.9 (3.1, 30.8)     | 10 (6, 14)<br>28.8 (16.8, 42.8)   | 113 (67, 160)<br>27.1 (16, 38.2)     | 28 (16, 43)<br>22.8 (13, 35.4)      | 464 (287, 675)<br>24.9 (15.4, 36.2)    | 91 (41, 162)<br>18.5 (8.3, 32.8)                           | 796 (350, 1473)<br>14.6 (6.4, 27)                                | 216 (114, 347)<br>13.5 (7.1, 21.6)   | 804 (353, 1433)<br>11.4 (5, 20.4)       | 382 (138, 659)<br>17.1 (6.2, 29.5)     | 1981 (999, 3358)<br>9.1 (4.6, 15.4)     | 826 (338, 1601)<br>6.6 (2.7, 12.9)      | 5845 (4400, 7424)<br>10.9 (8.2, 13.9)                   |
|                             |                                      | <b>Race</b>                    |                                   |                                    |                                   |                                      |                                     |                                        |                                                            |                                                                  |                                      |                                         |                                        |                                         |                                         |                                                         |
|                             |                                      | White                          | <i>N deaths</i><br>% <i>CHD</i>   | 109 (55, 169)<br>23.4 (11.7, 36.2) | 51 (31, 70)<br>31.6 (19.2, 43.7)  | 724 (475, 1000)<br>28.6 (18.8, 39.6) | 281 (168, 394)<br>30.5 (18.2, 42.8) | 2921 (1924, 4007)<br>24.5 (16.1, 33.6) | 746 (421, 1153)<br>19.6 (11.1, 30.4)                       | 4304 (2445, 6683)<br>16.5 (9.4, 25.6)                            | 1384 (817, 2052)<br>15.2 (9, 22.5)   | 5643 (3254, 8377)<br>24.1 (15.8, 25.3)  | 3392 (2059, 4727)<br>11.5 (7, 14.8)    | 9814 (6621, 13845)<br>10.5 (7, 14.5)    | 10843 (7173, 14928)<br>10.5 (7.1, 14.8) | 40442 (34410, 47368)<br>13.5 (11.5, 15.8)               |
|                             |                                      | Black                          | <i>N deaths</i><br>% <i>CHD</i>   | 66 (44, 87)<br>38.1 (25.5, 49.8)   | 27 (17, 35)<br>37.7 (24.5, 49.7)  | 284 (191, 366)<br>37.8 (25.5, 48.7)  | 87 (53, 124)<br>30.7 (18.8, 43.7)   | 765 (486, 1031)<br>29.7 (18.9, 40)     | 340 (215, 466)<br>27.2 (17.2, 37.3)                        | 960 (547, 1442)<br>18.7 (10.7, 28.2)                             | 594 (388, 851)<br>22 (14.4, 31.6)    | 1180 (777, 1562)<br>24.4 (16.1, 32.3)   | 830 (556, 1096)<br>25.3 (16.9, 33.3)   | 870 (534, 1280)<br>9.8 (0, 19.4)        | 1050 (0, 2069)<br>12 (7.4, 17.7)        | 7032 (5708, 8371)<br>18.1 (14.7, 21.5)                  |
|                             |                                      | Hispanic                       | <i>N deaths</i><br>% <i>CHD</i>   | 30 (0, 42)<br>38.5 (0, 53.5)       | 7 (5, 10)<br>37.2 (24.6, 47.8)    | 119 (73, 159)<br>33.9 (20.9, 45.4)   | 34 (20, 46)<br>36.9 (21.6, 50.1)    | 392 (254, 508)<br>33 (21.4, 42.7)      | 119 (75, 162)<br>34.2 (21.5, 46.3)                         | 587 (354, 831)<br>26.3 (15.8, 37.2)                              | 256 (168, 333)<br>29.3 (17.9, 38.2)  | 608 (389, 812)<br>24.6 (15.7, 32.8)     | 317 (207, 423)<br>24.4 (15.9, 32.6)    | 856 (582, 1111)<br>24.7 (17, 23.3)      | 907 (628, 1265)<br>15.8 (10.8, 20.5)    | 4233 (3674, 4827)<br>20.4 (17.7, 23.3)                  |
|                             |                                      | Other                          | <i>N deaths</i><br>% <i>CHD</i>   | 16 (10, 22)<br>35.6 (21.7, 49.3)   | 4 (2, 5)<br>35.2 (22.7, 49.1)     | 60 (35, 88)<br>28.3 (16.5, 41.7)     | 17 (11, 22)<br>36.9 (23.4, 48.2)    | 234 (0, 313)<br>34.9 (0, 46.8)         | 36 (18, 56)<br>23.4 (11.5, 36.5)                           | 259 (125, 399)<br>21.7 (10.5, 36.8)                              | 103 (64, 145)<br>24.8 (15.5, 34.8)   | 287 (149, 449)<br>20.7 (10.8, 32.5)     | 131 (0, 231)<br>8.8 (0, 33.2)          | 274 (36, 593)<br>16.9 (8.5, 21.6)       | 462 (284, 720)<br>13.9 (7.4, 21.2)      | 1881 (1448, 2392)<br>16.7 (12.9, 21.2)                  |
|                             |                                      | <b>Total</b>                   | <i>N deaths</i><br>% <i>CHD</i>   | 177 (93, 259)<br>23.2 (12.1, 33.9) | 91 (60, 118)<br>34.8 (22.7, 45.2) | 1191 (784, 1590)<br>31 (20.4, 41.4)  | 461 (299, 611)<br>34.4 (22.3, 45.5) | 4648 (2859, 6179)<br>28.4 (17.5, 37.8) | 1381 (868, 1933)<br>24.9 (15.6, 34.8)                      | 4013 (1718, 6992)<br>11.6 (5, 20.2)                              | 2228 (1381, 3127)<br>17 (10.5, 23.9) | 7206 (4351, 10415)<br>17.3 (10.4, 24.9) | 4731 (2976, 6301)<br>22.5 (14.1, 29.9) | 11936 (8110, 16679)<br>10.9 (7.4, 15.3) | 16457 (11539, 22207)<br>13.3 (9.3, 18)  | <b>54591 (46447, 63554)</b><br><b>14.7 (12.5, 17.1)</b> |
| <b>Nuts/seeds</b>           | <b>Diabetes</b>                      | <b>Overall by age</b>          | <i>N deaths</i>                   | 77 (46, 108)                       | 253 (152, 355)                    | 640 (371, 886)                       | 676 (391, 1058)                     | 1291 (783, 1887)                       | 1774 (1157, 2415)                                          | <b>M: 2339 (1706, 3002)</b><br><b>F: 2380 (1702, 3083)</b>       |                                      |                                         |                                        |                                         |                                         |                                                         |
| <b>&lt;20.2 g/d</b>         |                                      | % <i>DM</i>                    | 12.8 (7.7, 18.1)                  | 14.7 (8.8, 20.6)                   | 11.8 (6.9, 16.4)                  | 5.8 (3.4, 9.1)                       | 8.4 (5.1, 12.3)                     | 5.3 (3.5, 7.3)                         | <b>M: 6.6 (4.8, 8.4)</b><br><b>F: 7.4 (5.3, 9.5)</b>       |                                                                  |                                      |                                         |                                        |                                         |                                         |                                                         |
|                             |                                      | <b>Education</b>               |                                   |                                    |                                   |                                      |                                     |                                        |                                                            |                                                                  |                                      |                                         |                                        |                                         |                                         |                                                         |
|                             |                                      | <High-school                   | <i>N deaths</i><br>% <i>DM</i>    | 16 (8, 23)<br>19.6 (9.4, 29)       | 12 (6, 17)<br>20.8 (10, 30.7)     | 43 (20, 65)<br>17.6 (8.5, 27)        | 22 (10, 34)<br>16.2 (7.6, 25.4)     | 114 (54, 169)<br>16.3 (7.7, 24.2)      | 60 (27, 95)<br>14.3 (6.3, 22.6)                            | 147 (70, 236)<br>11.2 (5.3, 18)                                  | 95 (42, 157)<br>10.5 (4.6, 17.4)     | 240 (114, 353)<br>11.3 (5.4, 16.7)      | 171 (71, 261)<br>10.1 (4.2, 15.5)      | 246 (129, 377)<br>5.8 (3, 8.8)          | 428 (206, 649)<br>6.9 (3.3, 10.5)       | 1595 (1277, 1917)<br>8.8 (7, 10.6)                      |
|                             |                                      | High-school                    | <i>N deaths</i><br>% <i>DM</i>    | 38 (18, 58)<br>16.3 (7.5, 24.9)    | 30 (15, 45)<br>17.4 (8.5, 26.1)   | 102 (47, 156)<br>13.9 (6.4, 21.3)    | 80 (37, 123)<br>17.9 (8.2, 27.4)    | 285 (138, 453)<br>12.6 (6.1, 20)       | 116 (52, 198)<br>8.4 (3.8, 14.3)                           | 413 (185, 666)<br>8.9 (4, 14.4)                                  | 218 (95, 373)<br>7.3 (3.2, 12.5)     | 429 (198, 672)<br>8.4 (3.9, 13.1)       | 215 (88, 389)<br>5.3 (2.2, 9.6)        | 472 (240, 727)<br>4.5 (2.2, 6.9)        | 2757 (2238, 3352)<br>4.3 (2.5, 7.1)     | 629 (5, 6, 8.4)<br>6.7 (3, 12, 588)                     |
|                             |                                      | College                        | <i>N deaths</i><br>% <i>DM</i>    | 2 (0, 4)<br>5.1 (1, 13.6)          | 3 (1, 5)<br>13.1 (5.8, 22.3)      | 10 (4, 18)<br>11.8 (5.1, 20.1)       | 5 (2, 8)<br>9.8 (4.3, 17.3)         | 36 (15, 61)<br>10.9 (4.6, 18.1)        | 14 (2, 28)<br>7.9 (2.7, 15.5)                              | 61 (20, 126)<br>6.1 (2, 12.5)                                    | 29 (13, 53)<br>5.6 (2.4, 10.2)       | 64 (26, 97)<br>4.8 (1.9, 9.7)           | 48 (14, 102)<br>7 (2, 14.8)            | 95 (45, 172)<br>3.8 (1.8, 6.9)          | 43 (15, 93)<br>2.8 (1, 6)               | 6.9 (5, 6, 8.4)<br>5.2 (3.8, 6.7)                       |
|                             |                                      | <b>Race</b>                    |                                   |                                    |                                   |                                      |                                     |                                        |                                                            |                                                                  |                                      |                                         |                                        |                                         |                                         |                                                         |
|                             |                                      | White                          | <i>N deaths</i><br>% <i>DM</i>    | 19 (8, 35)<br>9.9 (4.2, 18.3)      | 18 (9, 29)<br>14.5 (6.8, 22.6)    | 76 (37, 122)<br>14.6 (6.1, 20.3)     | 53 (23, 87)<br>10.8 (4.5, 17.2)     | 221 (93, 353)<br>14.6 (6.1, 22.9)      | 95 (36, 163)<br>8.2 (3.1, 14.2)                            | 334 (141, 591)<br>6.6 (2.9, 10.8)                                | 177 (78, 293)<br>7.1 (3, 12.5)       | 449 (193, 755)<br>6.6 (2.9, 10.8)       | 388 (179, 604)<br>5.1 (2.3, 9.6)       | 512 (258, 783)<br>4.5 (2.3, 6.9)        | 587 (289, 882)<br>4.5 (2.3, 6.8)        | 2953 (2396, 3597)<br>6.3 (5.1, 7.7)                     |
|                             |                                      | Black                          | <i>N deaths</i><br>% <i>DM</i>    | 17 (7, 26)<br>18 (7, 27.6)         | 15 (7, 22)<br>18 (8.6, 26.8)      | 49 (24, 76)<br>17.6 (8.7, 27.2)      | 25 (11, 42)<br>13.9 (5.8, 23.2)     | 103 (45, 160)<br>13.7 (6, 21.2)        | 66 (29, 105)<br>11.7 (5.2, 18.7)                           | 112 (51, 191)<br>8.1 (3.7, 13.9)                                 | 108 (49, 174)<br>9.9 (4.5, 16)       | 160 (81, 252)<br>10.9 (5.5, 17.1)       | 156 (74, 243)<br>11.2 (5.3, 17.5)      | 84 (40, 142)<br>5.1 (2.4, 8.7)          | 118 (0, 278)<br>4 (0, 9.4)              | 1025 (796, 1270)<br>8.6 (6.7, 10.7)                     |
|                             |                                      | Hispanic                       | <i>N deaths</i><br>% <i>DM</i>    | 9 (2, 14)<br>17.9 (3.7, 29)        | 5 (3, 8)<br>17.7 (8.7, 26.7)      | 22 (10, 34)<br>15.8 (7.2, 24.3)      | 11 (5, 18)<br>16.8 (7.2, 27.3)      | 61 (30, 91)<br>15.3 (7.4, 22.8)        | 35 (16, 53)<br>16.1 (7.5, 24.6)                            | 88 (40, 136)<br>12 (5.4, 18.7)                                   | 64 (32, 100)<br>13 (6, 20.4)         | 90 (43, 138)<br>10.9 (5.2, 16.8)        | 75 (35, 119)<br>10.7 (5, 16.9)         | 87 (47, 124)<br>44 (23, 75)             | 654 (531, 768)<br>7.1 (3.8, 10)         | 6.2 (3.1, 9.5)<br>235 (178, 299)                        |
|                             |                                      | Other                          | <i>N deaths</i><br>% <i>DM</i>    | 2 (1, 3)<br>16.1 (6.4, 27.1)       | 2 (1, 3)<br>15.9 (6.8, 26.3)      | 8 (3, 13)<br>12.6 (5.2, 21.8)        | 3 (1, 5)<br>16.8 (8.2, 26.3)        | 28 (0, 45)<br>15.5 (0, 25.2)           | 33 (13, 59)<br>10.3 (4.4, 18.1)                            | 23 (10, 38)<br>9.8 (3.8, 17.6)                                   | 23 (10, 38)<br>11.2 (4.7, 18.4)      | 32 (13, 59)<br>9.2 (3.6, 16.2)          | 25 (3, 49)<br>7.8 (0.8, 16.2)          | 44 (23, 75)<br>630 (308, 984)           | 44 (23, 75)<br>1068 (560, 1582)         | 10 (8.1, 11.7)<br>8 (6.1, 10.2)                         |
|                             |                                      | <b>Total</b>                   | <i>N deaths</i><br>% <i>DM</i>    | 35 (15, 61)<br>10.2 (4.3, 17.6)    | 41 (21, 63)<br>16.1 (8.1, 25)     | 151 (68, 233)<br>14 (6.3, 21.6)      | 102 (49, 153)<br>15.9 (7.6, 23.8)   | 428 (193, 647)<br>12.6 (5.7, 19.1)     | 352 (127, 691)<br>10.7 (5.2, 16.9)                         | 323 (146, 519)<br>4.9 (1.8, 9.7)                                 | 323 (146, 519)<br>7.2 (3.3, 11.5)    | 654 (289, 1051)<br>7.4 (3.3, 12)        | 630 (308, 984)<br>9.6 (4.7, 15)        | 704 (347, 1069)<br>4.8 (2.3, 7.2)       | 1068 (560, 1582)<br>5.8 (3, 8.6)        | <b>4732 (3763, 5715)</b><br><b>7 (5.5, 8.4)</b>         |
| <b>Nuts/seeds</b>           | <b>Cardiometabolic disease</b>       | <b>Overall by age</b>          | <i>N deaths</i>                   | 344 (256, 435)                     | 1898 (1447, 2342)                 | 6644 (4893, 8316)                    | 6944 (4465, 10143)                  | 13204 (9952, 17026)                    | 30164 (23833, 37866)                                       | <b>M: 31587 (26003, 38270)</b><br><b>F: 27722 (2433, 33976)</b>  |                                      |                                         |                                        |                                         |                                         |                                                         |
| <b>&lt;20.2 g/d</b>         |                                      | % <i>CMD</i>                   | 9.4 (7, 11.9)                     | 15.1 (11.5, 18.7)                  | 15.7 (11.6, 19.7)                 | 8.1 (5.2, 11.8)                      | 11.5 (8.6, 14.8)                    | 6.8 (5.4, 8.6)                         | <b>M: 8.8 (7.3, 10.7)</b><br><b>F: 8.1 (6.5, 9.9)</b>      |                                                                  |                                      |                                         |                                        |                                         |                                         |                                                         |
|                             |                                      | <b>Education</b>               |                                   |                                    |                                   |                                      |                                     |                                        |                                                            |                                                                  |                                      |                                         |                                        |                                         |                                         |                                                         |
|                             |                                      | <High-school                   | <i>N deaths</i><br>% <i>CMD</i>   | 85 (63, 105)<br>16.2 (12.1, 20.1)  | 36 (27, 45)<br>14.4 (10.6, 17.9)  | 321 (226, 410)<br>19.5 (13.7, 24.8)  | 124 (86, 159)<br>15.3 (10.5, 19.6)  | 1213 (801, 1572)<br>21.1 (13.9, 27.3)  | 433 (300, 570)<br>16.4 (11.4, 21.6)                        | 1626 (1072, 2226)<br>15.9 (10.5, 21.8)                           | 681 (442, 951)<br>13.2 (8.6, 18.5)   | 2411 (1676, 3163)<br>15.7 (10.9, 20.6)  | 1281 (872, 1703)<br>12.8 (8.7, 17.1)   | 3928 (2688, 5224)<br>8.2 (5.6, 10.9)    | 5933 (4021, 7622)<br>8.5 (5.8, 11)      | 18114 (15466, 20438)<br>10.7 (9.1, 12.1)                |
|                             |                                      | High-school                    | <i>N deaths</i><br>% <i>CMD</i>   | 216 (152, 277)<br>13.5 (9.4, 17.3) | 93 (67, 118)<br>11.4 (8.3, 14.6)  | 903 (613, 1182)<br>15.7 (10.7, 20.6) | 421 (286, 546)<br>15.5 (10.5, 20.1) | 3317 (2240, 4491)<br>17.3 (11.7, 23.4) | 839 (522, 1201)<br>9.3 (5.8, 13.3)                         | 4904 (3102, 7087)<br>13.2 (8.3, 19)                              | 1742 (1062, 2428)<br>9.4 (5.8, 13.1) | 4862 (3404, 6828)<br>12.4 (8.3, 16.5)   | 1890 (1084, 2934)<br>6.7 (3.8, 10.4)   | 8452 (5931, 11407)<br>6.4 (4.4, 8.6)    | 34597 (29555, 39509)<br>5.6 (3.9, 7.5)  | 8.3 (7.1, 9.5)<br>6.276 (4788, 7899)                    |
|                             |                                      | College                        | <i>N deaths</i><br>% <i>CMD</i>   | 12 (4, 25)<br>4.4 (1.4, 9.5)       | 12 (8, 17)<br>7.5 (4.9, 10.6)     | 124 (77, 171)<br>13.1 (8.2, 18.1)    | 33 (21, 48)<br>12.4 (4.3, 10)       | 502 (323, 716)<br>15.2 (9.9, 21.8)     | 106 (54, 177)<br>6.8 (4.5, 16.9)                           | 869 (407, 1540)<br>9.3 (5.2, 13.5)                               | 248 (142, 378)<br>7.2 (3.4, 12.8)    | 869 (411, 1484)<br>8.5 (3.9, 10.5)      | 429 (177, 712)<br>6.1 (3.4, 11)        | 2086 (1095, 3445)<br>5.4 (2.8, 8.9)     | 871 (385, 1636)<br>6.2 (4.7, 7.7)       | 6276 (4788, 7899)<br>6.2 (4.7, 7.7)                     |
|                             |                                      | <b>Race</b>                    |                                   |                                    |                                   |                                      |                                     |                                        |                                                            |                                                                  |                                      |                                         |                                        |                                         |                                         |                                                         |
|                             |                                      | White                          | <i>N deaths</i><br>% <i>CMD</i>   | 128 (71, 189)<br>9.5 (5.3, 14.1)   | 70 (46, 91)<br>10.4 (6.9, 13.5)   | 802 (548, 1083)<br>16.2 (11.1, 21.9) | 334 (2                              |                                        |                                                            |                                                                  |                                      |                                         |                                        |                                         |                                         |                                                         |

**eTable 14. Absolute and proportional cardiometabolic disease mortality associated with suboptimal dietary habits in the US in 2012 by population subgroups (continued)**

| Dietary Factor <sup>a</sup> | Cardiometabolic Disease <sup>b</sup> | Population strata <sup>c</sup> | Associated mortality <sup>d</sup> | Age                              |                                  |                                     |                                    |                                     |                                     |                                       |                                      |                                      |                                     |                                        |                                       | Total (25+ y)                                 |
|-----------------------------|--------------------------------------|--------------------------------|-----------------------------------|----------------------------------|----------------------------------|-------------------------------------|------------------------------------|-------------------------------------|-------------------------------------|---------------------------------------|--------------------------------------|--------------------------------------|-------------------------------------|----------------------------------------|---------------------------------------|-----------------------------------------------|
|                             |                                      |                                |                                   | 25-34 y                          |                                  | 35-44 y                             |                                    | 45-54 y                             |                                     | 55-64 y                               |                                      | 65-74 y                              |                                     | 75+ y                                  |                                       | (95% UIs)                                     |
|                             |                                      |                                |                                   | Males (95% UIs)                  | Females (95% UIs)                | Males (95% UIs)                     | Females (95% UIs)                  | Males (95% UIs)                     | Females (95% UIs)                   | Males (95% UIs)                       | Females (95% UIs)                    | Males (95% UIs)                      | Females (95% UIs)                   | Males (95% UIs)                        | Females (95% UIs)                     |                                               |
| Whole grains                | Coronary heart disease               | Overall by age                 | <i>N deaths</i>                   | 101 (41, 167)                    |                                  | 507 (184, 792)                      |                                    | 1797 (747, 2826)                    |                                     | 3179 (1215, 5033)                     |                                      | 3478 (1482, 5494)                    |                                     | 7150 (3678, 10718)                     |                                       | M: 9754 (6409, 13280)<br>F: 6376 (3685, 9451) |
|                             |                                      | <125 g/d                       | % CHD                             | 9.9 (4, 16.3)                    |                                  | 9.8 (3.5, 15.3)                     |                                    | 8.2 (3.4, 12.9)                     |                                     | 6.7 (2.5, 10.5)                       |                                      | 5.5 (2.4, 8.7)                       |                                     | 3.1 (1.6, 4.6)                         |                                       | M: 4.7 (3.1, 6.4)<br>F: 3.9 (2.2, 5.7)        |
|                             |                                      | Education                      | <i>N deaths</i>                   |                                  |                                  |                                     |                                    |                                     |                                     |                                       |                                      |                                      |                                     |                                        |                                       |                                               |
|                             |                                      | <High-school                   | % CHD                             | 18 (3, 31)<br>10.9 (1.8, 18.5)   | 6 (1, 10)<br>10.8 (2.2, 18.4)    | 80 (19, 135)<br>10.9 (2.5, 18.4)    | 30 (5, 53)<br>10.1 (1.8, 18)       | 276 (50, 491)<br>8.7 (1.6, 15.4)    | 104 (22, 184)<br>8.8 (1.9, 15.5)    | 450 (71, 789)<br>7.5 (1.2, 13.2)      | 164 (28, 289)<br>6.7 (1.2, 11.9)     | 538 (104, 967)<br>6.1 (1.2, 10.9)    | 278 (61, 490)<br>5.8 (1.3, 10.2)    | 902 (294, 1517)<br>3.3 (1.1, 5.5)      | 1092 (342, 1794)<br>3.2 (1, 5.2)      | 3953 (2834, 5106)<br>4.4 (3.2, 5.7)           |
|                             |                                      | High-school                    | % CHD                             | 54 (11, 95)<br>10.5 (2.2, 18.5)  | 18 (4, 32)<br>10.8 (2.6, 18.9)   | 269 (55, 466)<br>10.2 (2.1, 17.7)   | 87 (23, 155)<br>9.6 (2.5, 17.1)    | 913 (169, 1586)<br>8.8 (1.8, 15.3)  | 329 (66, 571)<br>6.6 (1.1, 11.6)    | 1469 (241, 2568)<br>6.8 (1.4, 12.1)   | 592 (123, 1059)<br>5.6 (1.3, 9.6)    | 1369 (327, 2354)<br>5.5 (1, 9.9)     | 740 (129, 1341)<br>5.5 (1.1, 10.4)  | 1762 (538, 2901)<br>3.1 (0.9, 5.3)     | 2301 (663, 3912)<br>4.5 (3.2, 5.7)    | 9889 (7095, 12503)<br>2.240 (1580, 2946)      |
|                             |                                      | College                        | % CHD                             | 7 (1, 12)<br>9.8 (1.9, 16.6)     | 3 (1, 5)<br>9.5 (1.8, 16.5)      | 37 (8, 66)<br>8.9 (1.8, 15.7)       | 11 (2, 19)<br>9.1 (2, 15.5)        | 137 (20, 238)<br>8.5 (1.2, 11.2)    | 40 (7, 70)<br>6.5 (1.5, 14.2)       | 357 (67, 612)<br>6.7 (1.07, 11.8)     | 107 (15, 189)<br>5.4 (1.1, 10)       | 378 (76, 701)<br>5.4 (1.1, 9.8)      | 120 (22, 219)<br>5.4 (1.1, 9.8)     | 694 (228, 1157)<br>3.2 (1, 5.3)        | 353 (97, 594)<br>3.1 (1.1, 5.2)       | 2240 (1580, 2946)<br>4.2 (2.9, 5.5)           |
|                             |                                      | Race                           | <i>N deaths</i>                   |                                  |                                  |                                     |                                    |                                     |                                     |                                       |                                      |                                      |                                     |                                        |                                       |                                               |
|                             |                                      | White                          | % CHD                             | 47 (7, 83)<br>10.1 (1.6, 17.9)   | 16 (3, 28)<br>9.9 (2, 17.5)      | 247 (51, 419)<br>9.8 (2, 16.6)      | 87 (16, 151)<br>9.5 (1.8, 16.5)    | 964 (179, 1693)<br>8.1 (1.5, 14.2)  | 321 (59, 558)<br>8.5 (1.6, 14.7)    | 1759 (360, 3017)<br>6.7 (1.4, 11.6)   | 631 (144, 1091)<br>6.9 (1.6, 12)     | 1840 (288, 3259)<br>5.6 (0.9, 9.9)   | 881 (177, 1528)<br>5.6 (1.1, 9.7)   | 2926 (912, 4933)<br>3.1 (1, 5.3)       | 3220 (858, 5362)<br>3.1 (0.8, 5.2)    | 12852 (9287, 16383)<br>4.3 (3.1, 5.5)         |
|                             |                                      | Black                          | % CHD                             | 18 (4, 31)<br>10.4 (2.4, 18.1)   | 7 (2, 13)<br>10.5 (2.2, 18.1)    | 77 (13, 130)<br>10.3 (1.8, 17.3)    | 29 (7, 51)<br>10.3 (2.6, 17.9)     | 209 (32, 361)<br>8.7 (1.8, 15.1)    | 109 (23, 188)<br>7 (1.7, 12.6)      | 361 (86, 645)<br>7.2 (1.4, 12.5)      | 194 (37, 336)<br>5.7 (1.2, 10.3)     | 276 (59, 500)<br>5.9 (1.4, 10.4)     | 195 (48, 342)<br>3.4 (1.1, 5.6)     | 245 (81, 402)<br>3.3 (1.1, 5.2)        | 338 (115, 559)<br>4.9 (3.2, 6.6)      | 2058 (1509, 2565)<br>1006 (732, 1275)         |
|                             |                                      | Hispanic                       | % CHD                             | 8 (2, 15)<br>10.4 (2.2, 18.5)    | 2 (0, 4)<br>11.1 (2, 18.9)       | 38 (10, 66)<br>10.8 (2.9, 18.8)     | 9 (2, 16)<br>9.9 (2.3, 17.1)       | 101 (18, 178)<br>8.5 (1.5, 15)      | 31 (7, 52)<br>6.8 (1.4, 12)         | 153 (30, 268)<br>7 (1.5, 12.1)        | 143 (25, 250)<br>5.8 (1.1, 10.3)     | 75 (15, 134)<br>5.7 (1.1, 10.3)      | 186 (56, 310)<br>5.3 (1.1, 10.4)    | 209 (67, 348)<br>3.3 (1.1, 5.5)        | 186 (56, 310)<br>3.3 (1.1, 5.5)       | 1006 (732, 1275)<br>4.5 (3.2, 6.2)            |
|                             |                                      | Other                          | % CHD                             | 4 (1, 8)<br>10.1 (2, 17.7)       | 1 (0, 2)<br>9.8 (1.8, 17.3)      | 19 (4, 34)<br>9.1 (1.7, 16)         | 4 (1, 7)<br>8.9 (1.4, 15.1)        | 52 (8, 92)<br>7.8 (1.2, 13.8)       | 13 (2, 21)<br>8.2 (1.4, 14)         | 77 (13, 135)<br>6.5 (1.1, 11.4)       | 25 (6, 44)<br>5.9 (1.5, 10.7)        | 78 (16, 143)<br>5.7 (1.1, 10.3)      | 37 (8, 70)<br>5.3 (1.1, 10)         | 102 (29, 170)<br>3.3 (0.9, 5.5)        | 94 (26, 170)<br>2.8 (0.8, 5.1)        | 506 (356, 647)<br>4.5 (3.2, 5.7)              |
|                             |                                      | Total                          | % CHD                             | 76 (11, 134)<br>9.9 (1.5, 17.6)  | 27 (6, 45)<br>10.2 (2.2, 17.2)   | 377 (90, 661)<br>9.8 (2.3, 17.2)    | 128 (33, 221)<br>9.6 (2.4, 16.5)   | 1330 (374, 2309)<br>8.1 (2.3, 14.1) | 460 (131, 805)<br>8.3 (2.4, 14.5)   | 2332 (393, 4046)<br>6.7 (1.1, 11.9)   | 874 (149, 1565)<br>5.5 (1.3, 9.6)    | 2314 (543, 4007)<br>5.6 (1.1, 10)    | 1179 (231, 2102)<br>3.1 (1, 5.1)    | 3427 (1084, 5609)<br>3.1 (1, 5.2)      | 3761 (1186, 6458)<br>3.1 (1, 5.2)     | 16169 (11749, 20833)<br>4.4 (3.2, 5.6)        |
| Whole grains                | Stroke, total                        | Overall by age                 | <i>N deaths</i>                   | 132 (88, 169)                    |                                  | 407 (275, 516)                      |                                    | 1151 (822, 1464)                    |                                     | 1855 (1372, 2310)                     |                                      | 2558 (1897, 3173)                    |                                     | 7322 (5629, 8925)                      |                                       | M: 5953 (4907, 6939)<br>F: 7503 (5868, 8965)  |
|                             |                                      | <125 g/d                       | % TSTK                            | 24.7 (16.5, 31.6)                |                                  | 23.5 (15.9, 30)                     |                                    | 20.3 (14.5, 25.9)                   |                                     | 16.8 (12.4, 20.9)                     |                                      | 14.1 (10.4, 17.5)                    |                                     | 8 (6.2, 9.8)                           |                                       | M: 11.3 (9.4, 13.2)<br>F: 9.9 (7.7, 11.8)     |
|                             |                                      | Education                      | <i>N deaths</i>                   |                                  |                                  |                                     |                                    |                                     |                                     |                                       |                                      |                                      |                                     |                                        |                                       |                                               |
|                             |                                      | <High-school                   | % TSTK                            | 16 (8, 23)<br>25.8 (12.3, 36.7)  | 12 (6, 16)<br>26.2 (13.2, 36.6)  | 57 (30, 81)<br>26 (13.8, 36.6)      | 39 (20, 53)<br>24.6 (13, 33.7)     | 161 (96, 216)<br>21.4 (12.5, 29.7)  | 105 (61, 145)<br>21.4 (12.5, 29.7)  | 244 (150, 322)<br>18.6 (11.4, 24.5)   | 148 (98, 194)<br>17 (11.2, 22.3)     | 338 (222, 447)<br>15.3 (10, 20.2)    | 276 (190, 371)<br>14.1 (9.1, 18.7)  | 698 (484, 897)<br>12.5 (8.5, 17.5)     | 1254 (862, 1653)<br>9.7 (8.4, 11.4)   | 3346 (2888, 3796)<br>10.5 (9.1, 12)           |
|                             |                                      | High-school                    | % TSTK                            | 51 (27, 71)<br>25.4 (13.6, 35.4) | 39 (21, 53)<br>25.5 (14.1, 34.8) | 150 (87, 204)<br>24.4 (14.1, 33.2)  | 114 (65, 156)<br>24.1 (13.7, 33)   | 400 (242, 534)<br>20.6 (12.5, 27.5) | 368 (199, 505)<br>21.3 (11.5, 29.3) | 648 (405, 870)<br>16.4 (10.2, 22)     | 525 (311, 714)<br>17 (10.1, 23.2)    | 744 (459, 984)<br>13.8 (8.5, 18.2)   | 762 (479, 1028)<br>14.1 (9, 19)     | 1279 (872, 1680)<br>7.8 (5.3, 10.3)    | 2832 (1956, 3686)<br>5.3 (3.6, 6.8)   | 7892 (6786, 8976)<br>10.5 (9.1, 12)           |
|                             |                                      | College                        | % TSTK                            | 8 (4, 11)<br>23.5 (12.9, 33.1)   | 8 (5, 11)<br>22.8 (14.1, 30.5)   | 24 (12, 36)<br>21.8 (10.6, 31.7)    | 28 (13, 38)<br>21.8 (12.1, 30)     | 62 (37, 85)<br>18.7 (11.1, 25.7)    | 150 (95, 202)<br>19.8 (11.1, 28)    | 105 (63, 144)<br>16 (10.2, 21.6)      | 105 (63, 144)<br>16.4 (9.9, 22.5)    | 236 (145, 318)<br>13.7 (8.4, 18.5)   | 149 (94, 203)<br>13.7 (8.6, 18.6)   | 564 (377, 728)<br>8.1 (5.5, 10.5)      | 533 (363, 682)<br>7.6 (5.2, 9.7)      | 1915 (1660, 2159)<br>9.9 (8.6, 11.2)          |
|                             |                                      | Race                           | <i>N deaths</i>                   |                                  |                                  |                                     |                                    |                                     |                                     |                                       |                                      |                                      |                                     |                                        |                                       |                                               |
|                             |                                      | White                          | % TSTK                            | 36 (20, 52)<br>24.2 (13.2, 34.5) | 31 (18, 43)<br>23.9 (14.3, 33.4) | 106 (61, 148)<br>23.3 (13.3, 32.4)  | 92 (52, 129)<br>22 (7, 13)         | 325 (196, 433)<br>20.1 (12.1, 26.7) | 293 (167, 402)<br>20.9 (11.9, 28.7) | 664 (428, 892)<br>16.7 (10.7, 22.4)   | 481 (304, 655)<br>16.8 (10.6, 22.9)  | 962 (643, 1274)<br>14.1 (9.1, 18.7)  | 862 (559, 1144)<br>14.1 (9.1, 18.7) | 2136 (1485, 2782)<br>15.1 (10.5, 20.2) | 3916 (2720, 5175)<br>14.1 (9.5, 19.5) | 9924 (8443, 11389)<br>15.1 (13.4, 17.2)       |
|                             |                                      | Black                          | % TSTK                            | 17 (10, 24)<br>24.8 (14.2, 34.8) | 13 (7, 18)<br>24.9 (14.2, 35.1)  | 64 (31, 87)<br>24.9 (12.3, 34.2)    | 52 (28, 72)<br>24.6 (13.6, 34.3)   | 180 (109, 246)<br>20.2 (12.3, 27.6) | 158 (89, 218)<br>17.7 (11.2, 23.3)  | 270 (170, 355)<br>17.3 (11.2, 23.3)   | 202 (129, 278)<br>17.3 (11.2, 23.3)  | 231 (151, 310)<br>15.8 (9.5, 19.4)   | 216 (141, 287)<br>15 (9.8, 19.9)    | 225 (155, 290)<br>8.7 (6, 11.2)        | 409 (286, 538)<br>13 (9.5, 16.6)      | 2029 (1802, 2282)<br>8.7 (6.1, 11.2)          |
|                             |                                      | Hispanic                       | % TSTK                            | 15 (7, 22)<br>25.8 (12.7, 36.9)  | 10 (6, 14)<br>26.5 (14.2, 36.6)  | 49 (25, 69)<br>25.7 (13.2, 36.2)    | 24 (12, 34)<br>24.5 (12.6, 34.6)   | 84 (47, 117)<br>20.9 (11.7, 29.1)   | 55 (29, 78)<br>21.2 (11.3, 30.2)    | 100 (62, 136)<br>17.2 (10.6, 23.4)    | 65 (39, 89)<br>17.2 (10.4, 23.6)     | 92 (60, 123)<br>14.5 (9.4, 19.4)     | 89 (55, 121)<br>14.6 (9, 19.8)      | 154 (105, 200)<br>9 (6.1, 11.6)        | 226 (160, 295)<br>8.3 (5.9, 10.8)     | 962 (837, 1072)<br>12.5 (10.9, 14)            |
|                             |                                      | Other                          | % TSTK                            | 4 (2, 7)<br>24.7 (10.2, 36.7)    | 5 (3, 7)<br>23.8 (13.5, 33.4)    | 13 (7, 19)<br>21.8 (11.3, 31.6)     | 13 (7, 19)<br>21.5 (10.2, 30.7)    | 37 (22, 52)<br>19.5 (11.3, 27.3)    | 28 (14, 39)<br>19.8 (9.9, 27.9)     | 51 (31, 72)<br>15.7 (9.5, 21.9)       | 37 (21, 52)<br>14.8 (8.4, 20.5)      | 67 (41, 91)<br>14.5 (8.8, 19.8)      | 54 (34, 77)<br>13.7 (8.7, 19.3)     | 84 (66, 131)<br>13.7 (8.7, 19.3)       | 98 (66, 131)<br>7.3 (4.7, 10.2)       | 539 (464, 620)<br>11 (9.5, 12.7)              |
|                             |                                      | Total                          | % TSTK                            | 73 (36, 105)<br>24.7 (12, 35.2)  | 59 (35, 80)<br>24.7 (14.5, 33.8) | 228 (122, 311)<br>23.7 (12.7, 32.3) | 179 (99, 256)<br>23.3 (12.9, 33.4) | 632 (371, 849)<br>20.4 (12, 27.4)   | 533 (293, 730)<br>20.9 (11.5, 28.6) | 1066 (691, 1455)<br>16.6 (10.8, 22.7) | 786 (469, 1076)<br>16.9 (10.1, 23.1) | 1338 (902, 1812)<br>14.1 (8.8, 18.6) | 1206 (753, 1596)<br>8.2 (5.5, 10.5) | 2631 (1770, 3375)<br>8.2 (5.5, 10.5)   | 4720 (3285, 6062)<br>8 (5.6, 10.3)    | 13449 (11539, 15160)<br>10.5 (9, 11.8)        |
| Whole grains                | Ischemic Stroke                      | Overall by age                 | <i>N deaths</i>                   | 16 (9, 22)                       |                                  | 41 (22, 57)                         |                                    | 120 (66, 169)                       |                                     | 201 (109, 291)                        |                                      | 289 (151, 416)                       |                                     | 957 (553, 1359)                        |                                       | M: 706 (487, 941)<br>F: 911 (551, 1287)       |
|                             |                                      | <125 g/d                       | % ISTK                            | 24.8 (13.7, 34)                  |                                  | 23.5 (12.5, 32.7)                   |                                    | 20.4 (11.2, 28.8)                   |                                     | 16.7 (9.1, 24.3)                      |                                      | 14 (7.3, 20.1)                       |                                     | 8 (4.6, 11.3)                          |                                       | M: 11 (7.6, 14.7)<br>F: 9.4 (5.7, 13.3)       |
|                             |                                      | Education                      | <i>N deaths</i>                   |                                  |                                  |                                     |                                    |                                     |                                     |                                       |                                      |                                      |                                     |                                        |                                       |                                               |
|                             |                                      | <High-school                   | % ISTK                            | 1 (0, 2)<br>26 (9.7, 39.5)       | 1 (1, 2)<br>25.5 (10.2, 39.2)    | 5 (2, 8)<br>25.8 (8.8, 40.2)        | 2 (1, 3)<br>24.9 (7.8, 38.4)       | 15 (5, 23)<br>21.5 (7.3, 33.4)      | 10 (4, 16)<br>21.3 (7.8, 32.4)      | 30 (11, 45)<br>19.2 (7, 28.6)         | 19 (6, 30)<br>17 (5.3, 27.1)         | 42 (13, 67)<br>15.4 (4.8, 24.6)      | 37 (13, 60)<br>14.5 (5.2, 23.7)     | 95 (47, 144)<br>8.6 (4.3, 13)          | 173 (73, 275)<br>8.1 (3.4, 12.9)      | 427 (308, 549)<br>10.2 (7.4, 13.1)            |
|                             |                                      | High-school                    | % ISTK                            | 6 (2, 9)<br>25.5 (9.2, 38)       | 4 (2, 7)<br>25.1 (10, 39.3)      | 16 (6, 24)<br>24.6 (9.7, 37.3)      | 11 (4, 17)<br>23.9 (8.8, 35.9)     | 49 (18, 72)<br>21.1 (8, 31.4)       | 32 (12, 51)<br>20.9 (7.8, 32.6)     | 75 (26, 114)<br>16.7 (5.9, 25.5)      | 48 (16, 74)<br>16.9 (5.6, 26.4)      | 81 (28, 127)<br>13.8 (4.8, 21.5)     | 85 (28, 134)<br>14.2 (4.7, 22.3)    | 157 (62, 250)<br>7.7 (3, 12.2)         | 383 (152, 589)<br>7.3 (3, 12.2)       | 1042 (73, 12.8)<br>2.31 (1.71, 293)           |
|                             |                                      | College                        | % ISTK                            | 1 (0, 1)<br>23.5 (9.3, 36.7)     | 3 (1, 4)<br>23.2 (8.5, 36.3)     | 2 (1, 3)<br>21.7 (8, 34.4)          | 4 (2, 7)<br>21.8 (7.9, 33.7)       | 7 (3, 12)<br>18.6 (7.2, 30.6)       | 5 (2, 8)<br>19.5 (7.3, 30.3)        | 18 (6, 29)<br>15.9 (5, 25.9)          | 18 (6, 29)<br>16.7 (5.5, 26.2)       | 27 (10, 43)<br>13.9 (5, 22.1)        | 23 (9, 33)<br>13.9 (5.1, 21.4)      | 77 (29, 112)<br>8.3 (3.3, 12.7)        | 70 (28, 114)<br>7.4 (3, 12)           | 231 (171, 293)<br>9.7 (7.1, 12.2)             |
|                             |                                      | Race                           | <i>N deaths</i>                   |                                  |                                  |                                     |                                    |                                     |                                     |                                       |                                      |                                      |                                     |                                        |                                       |                                               |
|                             |                                      | White                          | % ISTK                            | 4 (2, 7)<br>24.6 (9.4, 38.6)     | 4 (2, 7)<br>24.3 (9.8, 36.3)     | 13 (5, 20)<br>23.3 (8.5, 36.3)      | 11 (4, 17)<br>23 (7.4, 36.3)       | 39 (14, 61)<br>20.4 (7.2, 31.5)     | 33 (13, 50)<br>20.9 (8, 31.9)       | 84 (30, 133)<br>16.6 (5.8, 26.3)      | 49 (16, 78)<br>17.2 (5.7, 27.1)      | 113 (35, 180)<br>14.1 (5.2, 22.4)    | 96 (36, 153)<br>14.1 (5.2, 22.4)    | 275 (111, 423)<br>8.1 (3.3, 12.4)      | 515 (214, 805)<br>7.8 (3.2, 12.2)     | 1237 (893, 1564)<br>9.7 (7, 12.2)             |
|                             |                                      | Black                          | % ISTK                            | 2 (1, 3)<br>24.4 (9.7, 37.6)     | 2 (1, 3)<br>25 (8.5, 38.4)       | 4 (1, 6)<br>25 (8.3, 38.1)          | 4 (2, 7)<br>24.8 (9.7, 38.4)       | 12 (5, 19)<br>20.6 (6.3, 31.1)      | 22 (7, 34)<br>21.1 (8, 32.7)        | 28 (11, 45)<br>17.7 (6.7, 28.1)       | 20 (8, 31)<br>17.9 (6.7, 27.3)       | 27 (10, 44)<br>15 (5.5, 24.4)        | 26 (9, 41)<br>14.7 (4.9, 23.6)      | 33 (14, 50)<br>8.7 (3.7, 13.3)         | 64 (25, 96)<br>12.1 (9.5, 14.5)       | 242 (189, 291)<br>10.6 (8.3, 13.2)            |
|                             |                                      | Hispanic                       | % ISTK                            | 2 (1, 2)<br>25.9 (9, 39.1)       | 1 (0, 1)<br>26.4 (9.3, 40.6)     | 2 (1, 3)<br>25.8 (10, 39.2)         | 2 (1, 3)<br>24.8 (8.1, 37.3)       | 7 (3, 11)<br>21 (7.8, 32.5)         | 3 (1, 5)<br>21.4 (8.7, 33.1)        | 10 (3, 15)<br>17.1 (5.7, 27.1)        | 6 (2, 9)<br>17.5 (5.8, 27.4)         | 11 (4, 19)<br>14.3 (4.3, 23.2)       | 11 (4, 19)<br>14.8 (5.2, 24)        | 33 (14, 51)<br>8.8 (3.9, 13.5)         | 136 (83, 132)<br>8.4 (3.7, 13.2)      | 11.6 (9, 14.4)                                |
|                             |                                      | Other                          |                                   |                                  |                                  |                                     |                                    |                                     |                                     |                                       |                                      |                                      |                                     |                                        |                                       |                                               |

**eTable 14. Absolute and proportional cardiometabolic disease mortality associated with suboptimal dietary habits in the US in 2012 by population subgroups (continued)**

| Dietary Factor <sup>a</sup> | Cardiometabolic Disease <sup>b</sup> | Population strata <sup>c</sup> | Associated mortality <sup>d</sup> | Age             |                   |                 |                   |                 |                   |                 |                   |                 |                   |                 |                   | Total (25+ y) (95% UIs) |
|-----------------------------|--------------------------------------|--------------------------------|-----------------------------------|-----------------|-------------------|-----------------|-------------------|-----------------|-------------------|-----------------|-------------------|-----------------|-------------------|-----------------|-------------------|-------------------------|
|                             |                                      |                                |                                   | 25-34 y         |                   | 35-44 y         |                   | 45-54 y         |                   | 55-64 y         |                   | 65-74 y         |                   | 75+ y           |                   |                         |
|                             |                                      |                                |                                   | Males (95% UIs) | Females (95% UIs) |                         |
| <b>Education</b>            |                                      |                                |                                   |                 |                   |                 |                   |                 |                   |                 |                   |                 |                   |                 |                   |                         |
| <High-school                |                                      |                                |                                   |                 |                   |                 |                   |                 |                   |                 |                   |                 |                   |                 |                   |                         |
| <i>N deaths</i>             |                                      |                                |                                   |                 |                   |                 |                   |                 |                   |                 |                   |                 |                   |                 |                   |                         |
| 12 (4, 18)                  |                                      |                                |                                   |                 |                   |                 |                   |                 |                   |                 |                   |                 |                   |                 |                   |                         |
| 9 (3, 14)                   |                                      |                                |                                   |                 |                   |                 |                   |                 |                   |                 |                   |                 |                   |                 |                   |                         |
| 42 (15, 63)                 |                                      |                                |                                   |                 |                   |                 |                   |                 |                   |                 |                   |                 |                   |                 |                   |                         |
| 26 (10, 40)                 |                                      |                                |                                   |                 |                   |                 |                   |                 |                   |                 |                   |                 |                   |                 |                   |                         |
| 89 (33, 140)                |                                      |                                |                                   |                 |                   |                 |                   |                 |                   |                 |                   |                 |                   |                 |                   |                         |
| 59 (19, 94)                 |                                      |                                |                                   |                 |                   |                 |                   |                 |                   |                 |                   |                 |                   |                 |                   |                         |
| 94 (27, 143)                |                                      |                                |                                   |                 |                   |                 |                   |                 |                   |                 |                   |                 |                   |                 |                   |                         |
| 59 (21, 92)                 |                                      |                                |                                   |                 |                   |                 |                   |                 |                   |                 |                   |                 |                   |                 |                   |                         |
| 84 (33, 135)                |                                      |                                |                                   |                 |                   |                 |                   |                 |                   |                 |                   |                 |                   |                 |                   |                         |
| 77 (26, 121)                |                                      |                                |                                   |                 |                   |                 |                   |                 |                   |                 |                   |                 |                   |                 |                   |                         |
| 125 (56, 193)               |                                      |                                |                                   |                 |                   |                 |                   |                 |                   |                 |                   |                 |                   |                 |                   |                         |
| 198 (91, 308)               |                                      |                                |                                   |                 |                   |                 |                   |                 |                   |                 |                   |                 |                   |                 |                   |                         |
| 866 (689, 1040)             |                                      |                                |                                   |                 |                   |                 |                   |                 |                   |                 |                   |                 |                   |                 |                   |                         |
| <i>% HSTK</i>               |                                      |                                |                                   |                 |                   |                 |                   |                 |                   |                 |                   |                 |                   |                 |                   |                         |
| 25.7 (8.2, 39.1)            |                                      |                                |                                   |                 |                   |                 |                   |                 |                   |                 |                   |                 |                   |                 |                   |                         |
| 26.4 (9.4, 40)              |                                      |                                |                                   |                 |                   |                 |                   |                 |                   |                 |                   |                 |                   |                 |                   |                         |
| 26.4 (9.1, 39.6)            |                                      |                                |                                   |                 |                   |                 |                   |                 |                   |                 |                   |                 |                   |                 |                   |                         |
| 25.1 (9.2, 38.4)            |                                      |                                |                                   |                 |                   |                 |                   |                 |                   |                 |                   |                 |                   |                 |                   |                         |
| 21.4 (7.9, 33.8)            |                                      |                                |                                   |                 |                   |                 |                   |                 |                   |                 |                   |                 |                   |                 |                   |                         |
| 21.7 (7.2, 34.9)            |                                      |                                |                                   |                 |                   |                 |                   |                 |                   |                 |                   |                 |                   |                 |                   |                         |
| 15.2 (5.9, 24.6)            |                                      |                                |                                   |                 |                   |                 |                   |                 |                   |                 |                   |                 |                   |                 |                   |                         |
| 14.6 (4.8, 23)              |                                      |                                |                                   |                 |                   |                 |                   |                 |                   |                 |                   |                 |                   |                 |                   |                         |
| 8.5 (3.8, 13.1)             |                                      |                                |                                   |                 |                   |                 |                   |                 |                   |                 |                   |                 |                   |                 |                   |                         |
| 229 (86, 364)               |                                      |                                |                                   |                 |                   |                 |                   |                 |                   |                 |                   |                 |                   |                 |                   |                         |
| 264 (81, 423)               |                                      |                                |                                   |                 |                   |                 |                   |                 |                   |                 |                   |                 |                   |                 |                   |                         |
| 522 (220, 811)              |                                      |                                |                                   |                 |                   |                 |                   |                 |                   |                 |                   |                 |                   |                 |                   |                         |
| 2483 (1953, 2971)           |                                      |                                |                                   |                 |                   |                 |                   |                 |                   |                 |                   |                 |                   |                 |                   |                         |
| <i>N deaths</i>             |                                      |                                |                                   |                 |                   |                 |                   |                 |                   |                 |                   |                 |                   |                 |                   |                         |
| 38 (14, 58)                 |                                      |                                |                                   |                 |                   |                 |                   |                 |                   |                 |                   |                 |                   |                 |                   |                         |
| 27 (9, 41)                  |                                      |                                |                                   |                 |                   |                 |                   |                 |                   |                 |                   |                 |                   |                 |                   |                         |
| 95 (33, 145)                |                                      |                                |                                   |                 |                   |                 |                   |                 |                   |                 |                   |                 |                   |                 |                   |                         |
| 77 (31, 118)                |                                      |                                |                                   |                 |                   |                 |                   |                 |                   |                 |                   |                 |                   |                 |                   |                         |
| 221 (81, 336)               |                                      |                                |                                   |                 |                   |                 |                   |                 |                   |                 |                   |                 |                   |                 |                   |                         |
| 232 (85, 360)               |                                      |                                |                                   |                 |                   |                 |                   |                 |                   |                 |                   |                 |                   |                 |                   |                         |
| 245 (85, 385)               |                                      |                                |                                   |                 |                   |                 |                   |                 |                   |                 |                   |                 |                   |                 |                   |                         |
| 268 (101, 421)              |                                      |                                |                                   |                 |                   |                 |                   |                 |                   |                 |                   |                 |                   |                 |                   |                         |
| 245 (85, 385)               |                                      |                                |                                   |                 |                   |                 |                   |                 |                   |                 |                   |                 |                   |                 |                   |                         |
| 24.7 (8.5, 37.8)            |                                      |                                |                                   |                 |                   |                 |                   |                 |                   |                 |                   |                 |                   |                 |                   |                         |
| 24.1 (9.6, 36.7)            |                                      |                                |                                   |                 |                   |                 |                   |                 |                   |                 |                   |                 |                   |                 |                   |                         |
| 20.6 (7.5, 31.3)            |                                      |                                |                                   |                 |                   |                 |                   |                 |                   |                 |                   |                 |                   |                 |                   |                         |
| 21.4 (7.8, 33.2)            |                                      |                                |                                   |                 |                   |                 |                   |                 |                   |                 |                   |                 |                   |                 |                   |                         |
| 16.5 (6.3, 25.9)            |                                      |                                |                                   |                 |                   |                 |                   |                 |                   |                 |                   |                 |                   |                 |                   |                         |
| 17.3 (6, 27.2)              |                                      |                                |                                   |                 |                   |                 |                   |                 |                   |                 |                   |                 |                   |                 |                   |                         |
| 13.8 (5.1, 21.9)            |                                      |                                |                                   |                 |                   |                 |                   |                 |                   |                 |                   |                 |                   |                 |                   |                         |
| 14.2 (4.3, 22.7)            |                                      |                                |                                   |                 |                   |                 |                   |                 |                   |                 |                   |                 |                   |                 |                   |                         |
| 7.9 (3.1, 12.1)             |                                      |                                |                                   |                 |                   |                 |                   |                 |                   |                 |                   |                 |                   |                 |                   |                         |
| 8.1 (3.4, 12.6)             |                                      |                                |                                   |                 |                   |                 |                   |                 |                   |                 |                   |                 |                   |                 |                   |                         |
| 12.6 (9.9, 15.1)            |                                      |                                |                                   |                 |                   |                 |                   |                 |                   |                 |                   |                 |                   |                 |                   |                         |
| <i>N deaths</i>             |                                      |                                |                                   |                 |                   |                 |                   |                 |                   |                 |                   |                 |                   |                 |                   |                         |
| 5 (2, 8)                    |                                      |                                |                                   |                 |                   |                 |                   |                 |                   |                 |                   |                 |                   |                 |                   |                         |
| 4 (1, 6)                    |                                      |                                |                                   |                 |                   |                 |                   |                 |                   |                 |                   |                 |                   |                 |                   |                         |
| 19 (7, 29)                  |                                      |                                |                                   |                 |                   |                 |                   |                 |                   |                 |                   |                 |                   |                 |                   |                         |
| 19 (7, 28)                  |                                      |                                |                                   |                 |                   |                 |                   |                 |                   |                 |                   |                 |                   |                 |                   |                         |
| 37 (13, 58)                 |                                      |                                |                                   |                 |                   |                 |                   |                 |                   |                 |                   |                 |                   |                 |                   |                         |
| 64 (22, 101)                |                                      |                                |                                   |                 |                   |                 |                   |                 |                   |                 |                   |                 |                   |                 |                   |                         |
| 55 (19, 89)                 |                                      |                                |                                   |                 |                   |                 |                   |                 |                   |                 |                   |                 |                   |                 |                   |                         |
| 88 (35, 139)                |                                      |                                |                                   |                 |                   |                 |                   |                 |                   |                 |                   |                 |                   |                 |                   |                         |
| 62 (22, 97)                 |                                      |                                |                                   |                 |                   |                 |                   |                 |                   |                 |                   |                 |                   |                 |                   |                         |
| 132 (55, 205)               |                                      |                                |                                   |                 |                   |                 |                   |                 |                   |                 |                   |                 |                   |                 |                   |                         |
| 102 (43, 156)               |                                      |                                |                                   |                 |                   |                 |                   |                 |                   |                 |                   |                 |                   |                 |                   |                         |
| 116 (89, 146)               |                                      |                                |                                   |                 |                   |                 |                   |                 |                   |                 |                   |                 |                   |                 |                   |                         |
| <i>% HSTK</i>               |                                      |                                |                                   |                 |                   |                 |                   |                 |                   |                 |                   |                 |                   |                 |                   |                         |
| 23.4 (9.4, 36.3)            |                                      |                                |                                   |                 |                   |                 |                   |                 |                   |                 |                   |                 |                   |                 |                   |                         |
| 22.9 (7.4, 35.4)            |                                      |                                |                                   |                 |                   |                 |                   |                 |                   |                 |                   |                 |                   |                 |                   |                         |
| 22 (7.9, 34.6)              |                                      |                                |                                   |                 |                   |                 |                   |                 |                   |                 |                   |                 |                   |                 |                   |                         |
| 22 (7.8, 33.3)              |                                      |                                |                                   |                 |                   |                 |                   |                 |                   |                 |                   |                 |                   |                 |                   |                         |
| 18.8 (6.7, 29.6)            |                                      |                                |                                   |                 |                   |                 |                   |                 |                   |                 |                   |                 |                   |                 |                   |                         |
| 20 (7.6, 31.5)              |                                      |                                |                                   |                 |                   |                 |                   |                 |                   |                 |                   |                 |                   |                 |                   |                         |
| 15.8 (5.4, 25)              |                                      |                                |                                   |                 |                   |                 |                   |                 |                   |                 |                   |                 |                   |                 |                   |                         |
| 16.3 (5.7, 26.2)            |                                      |                                |                                   |                 |                   |                 |                   |                 |                   |                 |                   |                 |                   |                 |                   |                         |
| <b>Race</b>                 |                                      |                                |                                   |                 |                   |                 |                   |                 |                   |                 |                   |                 |                   |                 |                   |                         |
| White                       |                                      |                                |                                   |                 |                   |                 |                   |                 |                   |                 |                   |                 |                   |                 |                   |                         |
| <i>N deaths</i>             |                                      |                                |                                   |                 |                   |                 |                   |                 |                   |                 |                   |                 |                   |                 |                   |                         |
| 27 (11, 41)                 |                                      |                                |                                   |                 |                   |                 |                   |                 |                   |                 |                   |                 |                   |                 |                   |                         |
| 20 (8, 31)                  |                                      |                                |                                   |                 |                   |                 |                   |                 |                   |                 |                   |                 |                   |                 |                   |                         |
| 67 (25, 106)                |                                      |                                |                                   |                 |                   |                 |                   |                 |                   |                 |                   |                 |                   |                 |                   |                         |
| 59 (21, 95)                 |                                      |                                |                                   |                 |                   |                 |                   |                 |                   |                 |                   |                 |                   |                 |                   |                         |
| 173 (60, 268)               |                                      |                                |                                   |                 |                   |                 |                   |                 |                   |                 |                   |                 |                   |                 |                   |                         |
| 178 (66, 270)               |                                      |                                |                                   |                 |                   |                 |                   |                 |                   |                 |                   |                 |                   |                 |                   |                         |
| 258 (90, 406)               |                                      |                                |                                   |                 |                   |                 |                   |                 |                   |                 |                   |                 |                   |                 |                   |                         |
| 222 (84, 352)               |                                      |                                |                                   |                 |                   |                 |                   |                 |                   |                 |                   |                 |                   |                 |                   |                         |
| 305 (125, 488)              |                                      |                                |                                   |                 |                   |                 |                   |                 |                   |                 |                   |                 |                   |                 |                   |                         |
| 295 (114, 462)              |                                      |                                |                                   |                 |                   |                 |                   |                 |                   |                 |                   |                 |                   |                 |                   |                         |
| 458 (217, 695)              |                                      |                                |                                   |                 |                   |                 |                   |                 |                   |                 |                   |                 |                   |                 |                   |                         |
| 692 (306, 1057)             |                                      |                                |                                   |                 |                   |                 |                   |                 |                   |                 |                   |                 |                   |                 |                   |                         |
| 2737 (2137, 3315)           |                                      |                                |                                   |                 |                   |                 |                   |                 |                   |                 |                   |                 |                   |                 |                   |                         |
| <i>% HSTK</i>               |                                      |                                |                                   |                 |                   |                 |                   |                 |                   |                 |                   |                 |                   |                 |                   |                         |
| 24.3 (9.7, 37.8)            |                                      |                                |                                   |                 |                   |                 |                   |                 |                   |                 |                   |                 |                   |                 |                   |                         |
| 24 (9.3, 36.9)              |                                      |                                |                                   |                 |                   |                 |                   |                 |                   |                 |                   |                 |                   |                 |                   |                         |
| 23.1 (8.6, 36.9)            |                                      |                                |                                   |                 |                   |                 |                   |                 |                   |                 |                   |                 |                   |                 |                   |                         |
| 22.9 (8, 36.5)              |                                      |                                |                                   |                 |                   |                 |                   |                 |                   |                 |                   |                 |                   |                 |                   |                         |
| 20.1 (6.9, 31.1)            |                                      |                                |                                   |                 |                   |                 |                   |                 |                   |                 |                   |                 |                   |                 |                   |                         |
| 21.3 (7.9, 32.4)            |                                      |                                |                                   |                 |                   |                 |                   |                 |                   |                 |                   |                 |                   |                 |                   |                         |
| 16.4 (5.7, 26.7)            |                                      |                                |                                   |                 |                   |                 |                   |                 |                   |                 |                   |                 |                   |                 |                   |                         |
| 16.8 (6.4, 26.7)            |                                      |                                |                                   |                 |                   |                 |                   |                 |                   |                 |                   |                 |                   |                 |                   |                         |
| 14 (5.8, 22.4)              |                                      |                                |                                   |                 |                   |                 |                   |                 |                   |                 |                   |                 |                   |                 |                   |                         |
| 14.1 (5.5, 22.2)            |                                      |                                |                                   |                 |                   |                 |                   |                 |                   |                 |                   |                 |                   |                 |                   |                         |
| 8.1 (3.6, 12.3)             |                                      |                                |                                   |                 |                   |                 |                   |                 |                   |                 |                   |                 |                   |                 |                   |                         |
| 8.1 (3.6, 12.3)             |                                      |                                |                                   |                 |                   |                 |                   |                 |                   |                 |                   |                 |                   |                 |                   |                         |
| 11.5 (8.9, 13.9)            |                                      |                                |                                   |                 |                   |                 |                   |                 |                   |                 |                   |                 |                   |                 |                   |                         |
| Black                       |                                      |                                |                                   |                 |                   |                 |                   |                 |                   |                 |                   |                 |                   |                 |                   |                         |
| <i>N deaths</i>             |                                      |                                |                                   |                 |                   |                 |                   |                 |                   |                 |                   |                 |                   |                 |                   |                         |
| 11 (4, 18)                  |                                      |                                |                                   |                 |                   |                 |                   |                 |                   |                 |                   |                 |                   |                 |                   |                         |
| 8 (3, 13)                   |                                      |                                |                                   |                 |                   |                 |                   |                 |                   |                 |                   |                 |                   |                 |                   |                         |
| 40 (10, 63)                 |                                      |                                |                                   |                 |                   |                 |                   |                 |                   |                 |                   |                 |                   |                 |                   |                         |
| 33 (12, 52)                 |                                      |                                |                                   |                 |                   |                 |                   |                 |                   |                 |                   |                 |                   |                 |                   |                         |
| 99 (39, 153)                |                                      |                                |                                   |                 |                   |                 |                   |                 |                   |                 |                   |                 |                   |                 |                   |                         |
| 98 (34, 152)                |                                      |                                |                                   |                 |                   |                 |                   |                 |                   |                 |                   |                 |                   |                 |                   |                         |
| 102 (40, 159)               |                                      |                                |                                   |                 |                   |                 |                   |                 |                   |                 |                   |                 |                   |                 |                   |                         |
| 85 (32, 133)                |                                      |                                |                                   |                 |                   |                 |                   |                 |                   |                 |                   |                 |                   |                 |                   |                         |
| 51 (15, 82)                 |                                      |                                |                                   |                 |                   |                 |                   |                 |                   |                 |                   |                 |                   |                 |                   |                         |
| 688 (554, 818)              |                                      |                                |                                   |                 |                   |                 |                   |                 |                   |                 |                   |                 |                   |                 |                   |                         |
| <i>% HSTK</i>               |                                      |                                |                                   |                 |                   |                 |                   |                 |                   |                 |                   |                 |                   |                 |                   |                         |
| 24.9 (8.8, 39.1)            |                                      |                                |                                   |                 |                   |                 |                   |                 |                   |                 |                   |                 |                   |                 |                   |                         |
| 25.1 (9.4, 39.8)            |                                      |                                |                                   |                 |                   |                 |                   |                 |                   |                 |                   |                 |                   |                 |                   |                         |
| 25 (6.1, 39.1)              |                                      |                                |                                   |                 |                   |                 |                   |                 |                   |                 |                   |                 |                   |                 |                   |                         |
| 24.7 (9, 38.5)              |                                      |                                |                                   |                 |                   |                 |                   |                 |                   |                 |                   |                 |                   |                 |                   |                         |
| 20.3 (7.9, 31.4)            |                                      |                                |                                   |                 |                   |                 |                   |                 |                   |                 |                   |                 |                   |                 |                   |                         |
| 17.7 (7, 27.4)              |                                      |                                |                                   |                 |                   |                 |                   |                 |                   |                 |                   |                 |                   |                 |                   |                         |
| 17.6 (6.6, 27.5)            |                                      |                                |                                   |                 |                   |                 |                   |                 |                   |                 |                   |                 |                   |                 |                   |                         |
| 14.4 (4.2, 23)              |                                      |                                |                                   |                 |                   |                 |                   |                 |                   |                 |                   |                 |                   |                 |                   |                         |
| 15.1 (5, 24.1)              |                                      |                                |                                   |                 |                   |                 |                   |                 |                   |                 |                   |                 |                   |                 |                   |                         |
| 8.8 (3.8, 13.2)             |                                      |                                |                                   |                 |                   |                 |                   |                 |                   |                 |                   |                 |                   |                 |                   |                         |
| 7.9 (3, 12.6)               |                                      |                                |                                   |                 |                   |                 |                   |                 |                   |                 |                   |                 |                   |                 |                   |                         |
| 33 (14, 51)                 |                                      |                                |                                   |                 |                   |                 |                   |                 |                   |                 |                   |                 |                   |                 |                   |                         |
| 46 (19, 72)                 |                                      |                                |                                   |                 |                   |                 |                   |                 |                   |                 |                   |                 |                   |                 |                   |                         |
| 15.7 (12.6, 18.7)           |                                      |                                |                                   |                 |                   |                 |                   |                 |                   |                 |                   |                 |                   |                 |                   |                         |
| 39 (14, 51)                 |                                      |                                |                                   |                 |                   |                 |                   |                 |                   |                 |                   |                 |                   |                 |                   |                         |
| 46 (19, 72)                 |                                      |                                |                                   |                 |                   |                 |                   |                 |                   |                 |                   |                 |                   |                 |                   |                         |
| 19.1 (14, 24.6)             |                                      |                                |                                   |                 |                   |                 |                   |                 |                   |                 |                   |                 |                   |                 |                   |                         |
| 15.2 (12, 17.9)             |                                      |                                |                                   |                 |                   |                 |                   |                 |                   |                 |                   |                 |                   |                 |                   |                         |
| 15.2 (12, 17.9)             |                                      |                                |                                   |                 |                   |                 |                   |                 |                   |                 |                   |                 |                   |                 |                   |                         |
| 15.2 (12, 17.9)             |                                      |                                |                                   |                 |                   |                 |                   |                 |                   |                 |                   |                 |                   |                 |                   |                         |
| 22.4 (181, 267)             |                                      |                                |                                   |                 |                   |                 |                   |                 |                   |                 |                   |                 |                   |                 |                   |                         |
| 8.4 (3.6, 13.2)             |                                      |                                |                                   |                 |                   |                 |                   |                 |                   |                 |                   |                 |                   |                 |                   |                         |
| 7.3 (3, 12.1)               |                                      |                                |                                   |                 |                   |                 |                   |                 |                   |                 |                   |                 |                   |                 |                   |                         |
| 12.8 (10.3, 15.2)           |                                      |                                |                                   |                 |                   |                 |                   |                 |                   |                 |                   |                 |                   |                 |                   |                         |
| Total                       |                                      |                                |                                   |                 |                   |                 |                   |                 |                   |                 |                   |                 |                   |                 |                   |                         |
| <i>N deaths</i>             |                                      |                                |                                   |                 |                   |                 |                   |                 |                   |                 |                   |                 |                   |                 |                   |                         |
| 54 (18, 82)                 |                                      |                                |                                   |                 |                   |                 |                   |                 |                   |                 |                   |                 |                   |                 |                   |                         |
| 40 (17, 62)                 |                                      |                                |                                   |                 |                   |                 |                   |                 |                   |                 |                   |                 |                   |                 |                   |                         |
| 149 (52, 227)               |                                      |                                |                                   |                 |                   |                 |                   |                 |                   |                 |                   |                 |                   |                 |                   |                         |
| 122 (46, 187)               |                                      |                                |                                   |                 |                   |                 |                   |                 |                   |                 |                   |                 |                   |                 |                   |                         |
| 352 (116, 527)              |                                      |                                |                                   |                 |                   |                 |                   |                 |                   |                 |                   |                 |                   |                 |                   |                         |
| 239 (116, 507)              |                                      |                                |                                   |                 |                   |                 |                   |                 |                   |                 |                   |                 |                   |                 |                   |                         |
| 436 (176, 686)              |                                      |                                |                                   |                 |                   |                 |                   |                 |                   |                 |                   |                 |                   |                 |                   |                         |
| 361 (130, 570)              |                                      |                                |                                   |                 |                   |                 |                   |                 |                   |                 |                   |                 |                   |                 |                   |                         |
| 404 (158, 644)              |                                      |                                |                                   |                 |                   |                 |                   |                 |                   |                 |                   |                 |                   |                 |                   |                         |
| 403 (124, 643)              |                                      |                                |                                   |                 |                   |                 |                   |                 |                   |                 |                   |                 |                   |                 |                   |                         |
| 545 (237, 853)              |                                      |                                |                                   |                 |                   |                 |                   |                 |                   |                 |                   |                 |                   |                 |                   |                         |
| 836 (367, 1270)             |                                      |                                |                                   |                 |                   |                 |                   |                 |                   |                 |                   |                 |                   |                 |                   |                         |
| 4024 (3172, 4810)           |                                      |                                |                                   |                 |                   |                 |                   |                 |                   |                 |                   |                 |                   |                 |                   |                         |
| <i>% HSTK</i>               |                                      |                                |                                   |                 |                   |                 |                   |                 |                   |                 |                   |                 |                   |                 |                   |                         |
| 24.6 (8.4, 37.8)            |                                      |                                |                                   |                 |                   |                 |                   |                 |                   |                 |                   |                 |                   |                 |                   |                         |
| 24.8 (10.4, 38.3)           |                                      |                                |                                   |                 |                   |                 |                   |                 |                   |                 |                   |                 |                   |                 |                   |                         |
| 23.5 (8.2, 35.8)            |                                      |                                |                                   |                 |                   |                 |                   |                 |                   |                 |                   |                 |                   |                 |                   |                         |
| 23.6 (8.9, 36.1)            |                                      |                                |                                   |                 |                   |                 |                   |                 |                   |                 |                   |                 |                   |                 |                   |                         |
| 20.4 (6.7, 30.5)            |                                      |                                |                                   |                 |                   |                 |                   |                 |                   |                 |                   |                 |                   |                 |                   |                         |
| 20.9 (7.4, 32.1)            |                                      |                                |                                   |                 |                   |                 |                   |                 |                   |                 |                   |                 |                   |                 |                   |                         |
| 16.8 (6.8, 26.4)            |                                      |                                |                                   |                 |                   |                 |                   |                 |                   |                 |                   |                 |                   |                 |                   |                         |
| 16.9 (5.7, 26.2)            |                                      |                                |                                   |                 |                   |                 |                   |                 |                   |                 |                   |                 |                   |                 |                   |                         |
| 8 (3.5, 12.5)               |                                      |                                |                                   |                 |                   |                 |                   |                 |                   |                 |                   |                 |                   |                 |                   |                         |
| 8 (3.5, 12.2)               |                                      |                                |                                   |                 |                   |                 |                   |                 |                   |                 |                   |                 |                   |                 |                   |                         |
| 12.3 (9.7, 14.8)            |                                      |                                |                                   |                 |                   |                 |                   |                 |                   |                 |                   |                 |                   |                 |                   |                         |
| <b>Whole grains</b>         |                                      |                                |                                   |                 |                   |                 |                   |                 |                   |                 |                   |                 |                   |                 |                   |                         |
| <b>Other Stroke</b>         |                                      |                                |                                   |                 |                   |                 |                   |                 |                   |                 |                   |                 |                   |                 |                   |                         |
| <b>Overall by age</b>       |                                      |                                |                                   |                 |                   |                 |                   |                 |                   |                 |                   |                 |                   |                 |                   |                         |
| <i>N deaths</i>             |                                      |                                |                                   |                 |                   |                 |                   |                 |                   |                 |                   |                 |                   |                 |                   |                         |
| 23 (14, 30)                 |                                      |                                |                                   |                 |                   |                 |                   |                 |                   |                 |                   |                 |                   |                 |                   |                         |
| 94 (58, 129)                |                                      |                                |                                   |                 |                   |                 |                   |                 |                   |                 |                   |                 |                   |                 |                   |                         |
| 362 (225, 490)              |                                      |                                |                                   |                 |                   |                 |                   |                 |                   |                 |                   |                 |                   |                 |                   |                         |
| 865 (533, 1175)             |                                      |                                |                                   |                 |                   |                 |                   |                 |                   |                 |                   |                 |                   |                 |                   |                         |
| 1446 (904, 2005)            |                                      |                                |                                   |                 |                   |                 |                   |                 |                   |                 |                   |                 |                   |                 |                   |                         |
| 5002 (3548, 6415)           |                                      |                                |                                   |                 |                   |                 |                   |                 |                   |                 |                   |                 |                   |                 |                   |                         |
| M: 3319 (2394, 4105)        |                                      |                                |                                   |                 |                   |                 |                   |                 |                   |                 |                   |                 |                   |                 |                   |                         |
| F: 4491 (3029, 5775)        |                                      |                                |                                   |                 |                   |                 |                   |                 |                   |                 |                   |                 |                   |                 |                   |                         |
| <i>% OSTK</i>               |                                      |                                |                                   |                 |                   |                 |                   |                 |                   |                 |                   |                 |                   |                 |                   |                         |
| <125 g/d                    |                                      |                                |                                   |                 |                   |                 |                   |                 |                   |                 |                   |                 |                   |                 |                   |                         |
| 24.8 (15.9, 33)             |                                      |                                |                                   |                 |                   |                 |                   |                 |                   |                 |                   |                 |                   |                 |                   |                         |
| 23.4 (14.4, 32)             |                                      |                                |                                   |                 |                   |                 |                   |                 |                   |                 |                   |                 |                   |                 |                   |                         |
| 20.5 (12.8, 27.8)           |                                      |                                |                                   |                 |                   |                 |                   |                 |                   |                 |                   |                 |                   |                 |                   |                         |
| 16.8 (10.4, 22.9)           |                                      |                                |                                   |                 |                   |                 |                   |                 |                   |                 |                   |                 |                   |                 |                   |                         |
| 14 (8.8, 19.4)              |                                      |                                |                                   |                 |                   |                 |                   |                 |                   |                 |                   |                 |                   |                 |                   |                         |
| 8.1 (5.7, 10.4)             |                                      |                                |                                   |                 |                   |                 |                   |                 |                   |                 |                   |                 |                   |                 |                   |                         |
| M: 10.7 (7.7, 13.2)         |                                      |                                |                                   |                 |                   |                 |                   |                 |                   |                 |                   |                 |                   |                 |                   |                         |
| F: 9.3 (6.3, 11.9)          |                                      |                                |                                   |                 |                   |                 |                   |                 |                   |                 |                   |                 |                   |                 |                   |                         |
| <b>Education</b>            |                                      |                                |                                   |                 |                   |                 |                   |                 |                   |                 |                   |                 |                   |                 |                   |                         |
| <High-school                |                                      |                                |                                   |                 |                   |                 |                   |                 |                   |                 |                   |                 |                   |                 |                   |                         |
| <i>N deaths</i>             |                                      |                                |                                   |                 |                   |                 |                   |                 |                   |                 |                   |                 |                   |                 |                   |                         |
| 3 (1, 4)                    |                                      |                                |                                   |                 |                   |                 |                   |                 |                   |                 |                   |                 |                   |                 |                   |                         |
| 2 (1, 2)                    |                                      |                                |                                   |                 |                   |                 |                   |                 |                   |                 |                   |                 |                   |                 |                   |                         |
| 11 (5, 16)                  |                                      |                                |                                   |                 |                   |                 |                   |                 |                   |                 |                   |                 |                   |                 |                   |                         |
| 11 (4, 16)                  |                                      |                                |                                   |                 |                   |                 |                   |                 |                   |                 |                   |                 |                   |                 |                   |                         |
| 57 (26, 83)                 |                                      |                                |                                   |                 |                   |                 |                   |                 |                   |                 |                   |                 |                   |                 |                   |                         |
| 36 (16, 53)                 |                                      |                                |                                   |                 |                   |                 |                   |                 |                   |                 |                   |                 |                   |                 |                   |                         |
| 122 (58, 179)               |                                      |                                |                                   |                 |                   |                 |                   |                 |                   |                 |                   |                 |                   |                 |                   |                         |
| 71 (38, 103)                |                                      |                                |                                   |                 |                   |                 |                   |                 |                   |                 |                   |                 |                   |                 |                   |                         |
| 214 (110, 307)              |                                      |                                |                                   |                 |                   |                 |                   |                 |                   |                 |                   |                 |                   |                 |                   |                         |
| 166 (81, 241)               |                                      |                                |                                   |                 |                   |                 |                   |                 |                   |                 |                   |                 |                   |                 |                   |                         |
| 476 (290, 656)              |                                      |                                |                                   |                 |                   |                 |                   |                 |                   |                 |                   |                 |                   |                 |                   |                         |
| 880 (512, 1234)             |                                      |                                |                                   |                 |                   |                 |                   |                 |                   |                 |                   |                 |                   |                 |                   |                         |
| 2047 (1622, 2460)           |                                      |                                |                                   |                 |                   |                 |                   |                 |                   |                 |                   |                 |                   |                 |                   |                         |
| <i>% OSTK</i>               |                                      |                                |                                   |                 |                   |                 |                   |                 |                   |                 |                   |                 |                   |                 |                   |                         |
| 26 (10.7, 37.3)             |                                      |                                |                                   |                 |                   |                 |                   |                 |                   |                 |                   |                 |                   |                 |                   |                         |
| 26 (11.9, 38)               |                                      |                                |                                   |                 |                   |                 |                   |                 |                   |                 |                   |                 |                   |                 |                   |                         |
| 25.7 (11.2, 38.9)           |                                      |                                |                                   |                 |                   |                 |                   |                 |                   |                 |                   |                 |                   |                 |                   |                         |
| 23.9 (10, 36.3)             |                                      |                                |                                   |                 |                   |                 |                   |                 |                   |                 |                   |                 |                   |                 |                   |                         |
| 21.6 (10.1, 31.6)           |                                      |                                |                                   |                 |                   |                 |                   |                 |                   |                 |                   |                 |                   |                 |                   |                         |
| 21.4 (9.3, 31.3)            |                                      |                                |                                   |                 |                   |                 |                   |                 |                   |                 |                   |                 |                   |                 |                   |                         |
| 18.5 (8.8, 27)              |                                      |                                |                                   |                 |                   |                 |                   |                 |                   |                 |                   |                 |                   |                 |                   |                         |
| 17 (9.1, 24.7)              |                                      |                                |                                   |                 |                   |                 |                   |                 |                   |                 |                   |                 |                   |                 |                   |                         |
| 15.4 (8, 22.1)              |                                      |                                |                                   |                 |                   |                 |                   |                 |                   |                 |                   |                 |                   |                 |                   |                         |
| 14.4 (7, 20.9)              |                                      |                                |                                   |                 |                   |                 |                   |                 |                   |                 |                   |                 |                   |                 |                   |                         |
| 8.4 (5.1, 11.6)             |                                      |                                |                                   |                 |                   |                 |                   |                 |                   |                 |                   |                 |                   |                 |                   |                         |
| 8.1 (4.7, 11.4)             |                                      |                                |                                   |                 |                   |                 |                   |                 |                   |                 |                   |                 |                   |                 |                   |                         |
| 9.9 (7.8, 11.9)             |                                      |                                |                                   |                 |                   |                 |                   |                 |                   |                 |                   |                 |                   |                 |                   |                         |
| High-school                 |                                      |                                |                                   |                 |                   |                 |                   |                 |                   |                 |                   |                 |                   |                 |                   |                         |
| <i>N deaths</i>             |                                      |                                |                                   |                 |                   |                 |                   |                 |                   |                 |                   |                 |                   |                 |                   |                         |
| 8 (4, 11)                   |                                      |                                |                                   |                 |                   |                 |                   |                 |                   |                 |                   |                 |                   |                 |                   |                         |
| 8 (3, 11)                   |                                      |                                |                                   |                 |                   |                 |                   |                 |                   |                 |                   |                 |                   |                 |                   |                         |
| 40 (18, 59)                 |                                      |                                |                                   |                 |                   |                 |                   |                 |                   |                 |                   |                 |                   |                 |                   |                         |
| 26 (11, 37)                 |                                      |                                |                                   |                 |                   |                 |                   |                 |                   |                 |                   |                 |                   |                 |                   |                         |
| 133 (67, 194)               |                                      |                                |                                   |                 |                   |                 |                   |                 |                   |                 |                   |                 |                   |                 |                   |                         |
| 104 (42, 155)               |                                      |                                |                                   |                 |                   |                 |                   |                 |                   |                 |                   |                 |                   |                 |                   |                         |
| 313 (137, 459)              |                                      |                                |                                   |                 |                   |                 |                   |                 |                   |                 |                   |                 |                   |                 |                   |                         |
| 236 (105, 346)              |                                      |                                |                                   |                 |                   |                 |                   |                 |                   |                 |                   |                 |                   |                 |                   |                         |
| 428 (202, 630)              |                                      |                                |                                   |                 |                   |                 |                   |                 |                   |                 |                   |                 |                   |                 |                   |                         |
| 422 (201, 610)              |                                      |                                |                                   |                 |                   |                 |                   |                 |                   |                 |                   |                 |                   |                 |                   |                         |
| 850 (486, 1188)             |                                      |                                |                                   |                 |                   |                 |                   |                 |                   |                 |                   |                 |                   |                 |                   |                         |
| 1929 (1153, 2699)           |                                      |                                |                                   |                 |                   |                 |                   |                 |                   |                 |                   |                 |                   |                 |                   |                         |
| <i>% OSTK</i>               |                                      |                                |                                   |                 |                   |                 |                   |                 |                   |                 |                   |                 |                   |                 |                   |                         |
| 25.3 (11.3, 36.9)           |                                      |                                |                                   |                 |                   |                 |                   |                 |                   |                 |                   |                 |                   |                 |                   |                         |
| 25.7 (11.6, 37.6)           |                                      |                                |                                   |                 |                   |                 |                   |                 |                   |                 |                   |                 |                   |                 |                   |                         |
| 24.5 (10.8, 36)             |                                      |                                |                                   |                 |                   |                 |                   |                 |                   |                 |                   |                 |                   |                 |                   |                         |
| 24.4 (10.5, 30.3)           |                                      |                                |                                   |                 |                   |                 |                   |                 |                   |                 |                   |                 |                   |                 |                   |                         |
| 21.3 (8.5, 31.9)            |                                      |                                |                                   |                 |                   |                 |                   |                 |                   |                 |                   |                 |                   |                 |                   |                         |
| 16.6 (7.4, 25.1)            |                                      |                                |                                   |                 |                   |                 |                   |                 |                   |                 |                   |                 |                   |                 |                   |                         |
| 17.1 (7.6, 25.1)            |                                      |                                |                                   |                 |                   |                 |                   |                 |                   |                 |                   |                 |                   |                 |                   |                         |
| 13.6 (6.4, 20)              |                                      |                                |                                   |                 |                   |                 |                   |                 |                   |                 |                   |                 |                   |                 |                   |                         |
| 14.4 (6.8, 20.8)            |                                      |                                |                                   |                 |                   |                 |                   |                 |                   |                 |                   |                 |                   |                 |                   |                         |
| 7.9 (4.5, 11.1)             |                                      |                                |                                   |                 |                   |                 |                   |                 |                   |                 |                   |                 |                   |                 |                   |                         |
| 9.7 (7.8, 11.7)             |                                      |                                |                                   |                 |                   |                 |                   |                 |                   |                 |                   |                 |                   |                 |                   |                         |
| College                     |                                      |                                |                                   |                 |                   |                 |                   |                 |                   |                 |                   |                 |                   |                 |                   |                         |
| <i>N deaths</i>             |                                      |                                |                                   |                 |                   |                 |                   |                 |                   |                 |                   |                 |                   |                 |                   |                         |
| 1 (1, 2)                    |                                      |                                |                                   |                 |                   |                 |                   |                 |                   |                 |                   |                 |                   |                 |                   |                         |
| 2 (1, 2)                    |                                      |                                |                                   |                 |                   |                 |                   |                 |                   |                 |                   |                 |                   |                 |                   |                         |
| 4 (2, 6)                    |                                      |                                |                                   |                 |                   |                 |                   |                 |                   |                 |                   |                 |                   |                 |                   |                         |
| 5 (2, 7)                    |                                      |                                |                                   |                 |                   |                 |                   |                 |                   |                 |                   |                 |                   |                 |                   |                         |
| 19 (8, 27)                  |                                      |                                |                                   |                 |                   |                 |                   |                 |                   |                 |                   |                 |                   |                 |                   |                         |
| 13 (6, 20)                  |                                      |                                |                                   |                 |                   |                 |                   |                 |                   |                 |                   |                 |                   |                 |                   |                         |
| 69 (35, 99)                 |                                      |                                |                                   |                 |                   |                 |                   |                 |                   |                 |                   |                 |                   |                 |                   |                         |
| 40 (19, 58)                 |                                      |                                |                                   |                 |                   |                 |                   |                 |                   |                 |                   |                 |                   |                 |                   |                         |
| 121 (55, 180)               |                                      |                                |                                   |                 |                   |                 |                   |                 |                   |                 |                   |                 |                   |                 |                   |                         |
| 76 (34, 115)                |                                      |                                |                                   |                 |                   |                 |                   |                 |                   |                 |                   |                 |                   |                 |                   |                         |
| 360 (198, 500)              |                                      |                                |                                   |                 |                   |                 |                   |                 |                   |                 |                   |                 |                   |                 |                   |                         |
| 359 (210, 499)              |                                      |                                |                                   |                 |                   |                 |                   |                 |                   |                 |                   |                 |                   |                 |                   |                         |
| 1067 (833, 1267)            |                                      |                                |                                   |                 |                   |                 |                   |                 |                   |                 |                   |                 |                   |                 |                   |                         |
| <i>% OSTK</i>               |                                      |                                |                                   |                 |                   |                 |                   |                 |                   |                 |                   |                 |                   |                 |                   |                         |
| 23.8 (10.9, 34.5)           |                                      |                                |                                   |                 |                   |                 |                   |                 |                   |                 |                   |                 |                   |                 |                   |                         |
| 23 (12.5, 32.5)             |                                      |                                |                                   |                 |                   |                 |                   |                 |                   |                 |                   |                 |                   |                 |                   |                         |
| 21.9 (8.2, 33.8)            |                                      |                                |                                   |                 |                   |                 |                   |                 |                   |                 |                   |                 |                   |                 |                   |                         |
| 22 (10.9, 31.7)             |                                      |                                |                                   |                 |                   |                 |                   |                 |                   |                 |                   |                 |                   |                 |                   |                         |
| 16.6 (8.3, 23.8)            |                                      |                                |                                   |                 |                   |                 |                   |                 |                   |                 |                   |                 |                   |                 |                   |                         |
| 16.0 (6.1, 20.3)            |                                      |                                |                                   |                 |                   |                 |                   |                 |                   |                 |                   |                 |                   |                 |                   |                         |
| 13.6 (6.1, 20.3)            |                                      |                                |                                   |                 |                   |                 |                   |                 |                   |                 |                   |                 |                   |                 |                   |                         |
| 13.9 (6.2, 20.9)            |                                      |                                |                                   |                 |                   |                 |                   |                 |                   |                 |                   |                 |                   |                 |                   |                         |
| 8.3 (7.3, 11.1)             |                                      |                                |                                   |                 |                   |                 |                   |                 |                   |                 |                   |                 |                   |                 |                   |                         |
| <b>Race</b>                 |                                      |                                |                                   |                 |                   |                 |                   |                 |                   |                 |                   |                 |                   |                 |                   |                         |
| White                       |                                      |                                |                                   |                 |                   |                 |                   |                 |                   |                 |                   |                 |                   |                 |                   |                         |
| <i>N deaths</i>             |                                      |                                |                                   |                 |                   |                 |                   |                 |                   |                 |                   |                 |                   |                 |                   |                         |
| 6 (3, 8)                    |                                      |                                |                                   |                 |                   |                 |                   |                 |                   |                 |                   |                 |                   |                 |                   |                         |
| 6 (3, 9)                    |                                      |                                |                                   |                 |                   |                 |                   |                 |                   |                 |                   |                 |                   |                 |                   |                         |
| 26 (12, 38)                 |                                      |                                |                                   |                 |                   |                 |                   |                 |                   |                 |                   |                 |                   |                 |                   |                         |
| 22 (11, 32)                 |                                      |                                |                                   |                 |                   |                 |                   |                 |                   |                 |                   |                 |                   |                 |                   |                         |
| 113 (51, 167)               |                                      |                                |                                   |                 |                   |                 |                   |                 |                   |                 |                   |                 |                   |                 |                   |                         |
| 85 (37, 127)                |                                      |                                |                                   |                 |                   |                 |                   |                 |                   |                 |                   |                 |                   |                 |                   |                         |
| 319 (166, 471)              |                                      |                                |                                   |                 |                   |                 |                   |                 |                   |                 |                   |                 |                   |                 |                   |                         |
| 211 (100, 318)              |                                      |                                |                                   |                 |                   |                 |                   |                 |                   |                 |                   |                 |                   |                 |                   |                         |
| 549 (274, 793)              |                                      |                                |                                   |                 |                   |                 |                   |                 |                   |                 |                   |                 |                   |                 |                   |                         |
| 470 (248, 700)              |                                      |                                |                                   |                 |                   |                 |                   |                 |                   |                 |                   |                 |                   |                 |                   |                         |
| 1419 (821, 1965)            |                                      |                                |                                   |                 |                   |                 |                   |                 |                   |                 |                   |                 |                   |                 |                   |                         |
| 2729 (1632, 3850)           |                                      |                                |                                   |                 |                   |                 |                   |                 |                   |                 |                   |                 |                   |                 |                   |                         |
| 5970 (4635, 7230)           |                                      |                                |                                   |                 |                   |                 |                   |                 |                   |                 |                   |                 |                   |                 |                   |                         |
| <i>% OSTK</i>               |                                      |                                |                                   |                 |                   |                 |                   |                 |                   |                 |                   |                 |                   |                 |                   |                         |
| 24.6 (11.6, 36.7)           |                                      |                                |                                   |                 |                   |                 |                   |                 |                   |                 |                   |                 |                   |                 |                   |                         |
| 24.6 (11.5, 36.7)           |                                      |                                |                                   |                 |                   |                 |                   |                 |                   |                 |                   |                 |                   |                 |                   |                         |
| 23.4 (11, 34.3)             |                                      |                                |                                   |                 |                   |                 |                   |                 |                   |                 |                   |                 |                   |                 |                   |                         |
| 23.3 (11.7, 34.1)           |                                      |                                |                                   |                 |                   |                 |                   |                 |                   |                 |                   |                 |                   |                 |                   |                         |
| 19.9 (9, 29.5)              |                                      |                                |                                   |                 |                   |                 |                   |                 |                   |                 |                   |                 |                   |                 |                   |                         |
| 20.7 (9.2, 31.1)            |                                      |                                |                                   |                 |                   |                 |                   |                 |                   |                 |                   |                 |                   |                 |                   |                         |
| 16.7 (8.7, 24.7)            |                                      |                                |                                   |                 |                   |                 |                   |                 |                   |                 |                   |                 |                   |                 |                   |                         |
| 16.7 (7.9, 25.2)            |                                      |                                |                                   |                 |                   |                 |                   |                 |                   |                 |                   |                 |                   |                 |                   |                         |
| 14 (7, 20.3)                |                                      |                                |                                   |                 |                   |                 |                   |                 |                   |                 |                   |                 |                   |                 |                   |                         |
| 14 (7, 20.3)                |                                      |                                |                                   |                 |                   |                 |                   |                 |                   |                 |                   |                 |                   |                 |                   |                         |
| 8.1 (4.7, 11.2)             |                                      |                                |                                   |                 |                   |                 |                   |                 |                   |                 |                   |                 |                   |                 |                   |                         |
| 8 (4.8, 11.2)               |                                      |                                |                                   |                 |                   |                 |                   |                 |                   |                 |                   |                 |                   |                 |                   |                         |
| 9.4 (7.3, 11.4)             |                                      |                                |                                   |                 |                   |                 |                   |                 |                   |                 |                   |                 |                   |                 |                   |                         |
| Black                       |                                      |                                |                                   |                 |                   |                 |                   |                 |                   |                 |                   |                 |                   |                 |                   |                         |
| <i>N deaths</i>             |                                      |                                |                                   |                 |                   |                 |                   |                 |                   |                 |                   |                 |                   |                 |                   |                         |
| 4 (2, 6)                    |                                      |                                |                                   |                 |                   |                 |                   |                 |                   |                 |                   |                 |                   |                 |                   |                         |
| 2 (1, 3)                    |                                      |                                |                                   |                 |                   |                 |                   |                 |                   |                 |                   |                 |                   |                 |                   |                         |
| 18 (8, 29)                  |                                      |                                |                                   |                 |                   |                 |                   |                 |                   |                 |                   |                 |                   |                 |                   |                         |
| 14 (6, 21)                  |                                      |                                |                                   |                 |                   |                 |                   |                 |                   |                 |                   |                 |                   |                 |                   |                         |
| 59 (26, 88)                 |                                      |                                |                                   |                 |                   |                 |                   |                 |                   |                 |                   |                 |                   |                 |                   |                         |
| 49 (22, 73)                 |                                      |                                |                                   |                 |                   |                 |                   |                 |                   |                 |                   |                 |                   |                 |                   |                         |
| 139 (65, 204)               |                                      |                                |                                   |                 |                   |                 |                   |                 |                   |                 |                   |                 |                   |                 |                   |                         |
| 99 (44, 146)                |                                      |                                |                                   |                 |                   |                 |                   |                 |                   |                 |                   |                 |                   |                 |                   |                         |
| 154 (85, 228)               |                                      |                                |                                   |                 |                   |                 |                   |                 |                   |                 |                   |                 |                   |                 |                   |                         |
| 131 (66, 190)               |                                      |                                |                                   |                 |                   |                 |                   |                 |                   |                 |                   |                 |                   |                 |                   |                         |
| 155 (93, 214)               |                                      |                                |                                   |                 |                   |                 |                   |                 |                   |                 |                   |                 |                   |                 |                   |                         |
| 281 (173, 390)              |                                      |                                |                                   |                 |                   |                 |                   |                 |                   |                 |                   |                 |                   |                 |                   |                         |
| 1104 (922, 1299)            |                                      |                                |                                   |                 |                   |                 |                   |                 |                   |                 |                   |                 |                   |                 |                   |                         |
| <i>% OSTK</i>               |                                      |                                |                                   |                 |                   |                 |                   |                 |                   |                 |                   |                 |                   |                 |                   |                         |
| 25.1 (10.8, 36.2)           |                                      |                                |                                   |                 |                   |                 |                   |                 |                   |                 |                   |                 |                   |                 |                   |                         |
| 25.1 (11.2, 36.2)           |                                      |                                |                                   |                 |                   |                 |                   |                 |                   |                 |                   |                 |                   |                 |                   |                         |
| 24.9 (10.1, 36.6)           |                                      |                                |                                   |                 |                   |                 |                   |                 |                   |                 |                   |                 |                   |                 |                   |                         |
| 24.8 (10.2, 36.8)           |                                      |                                |                                   |                 |                   |                 |                   |                 |                   |                 |                   |                 |                   |                 |                   |                         |
| 20.8 (9, 29.8)              |                                      |                                |                                   |                 |                   |                 |                   |                 |                   |                 |                   |                 |                   |                 |                   |                         |
| 20.8 (9.4, 31.1)            |                                      |                                |                                   |                 |                   |                 |                   |                 |                   |                 |                   |                 |                   |                 |                   |                         |
| 17.8 (8.3, 26)              |                                      |                                |                                   |                 |                   |                 |                   |                 |                   |                 |                   |                 |                   |                 |                   |                         |
| 17.4 (7.7, 25.6)            |                                      |                                |                                   |                 |                   |                 |                   |                 |                   |                 |                   |                 |                   |                 |                   |                         |
| 14.5 (8, 21.4)              |                                      |                                |                                   |                 |                   |                 |                   |                 |                   |                 |                   |                 |                   |                 |                   |                         |
| 15.1 (7.6, 22)              |                                      |                                |                                   |                 |                   |                 |                   |                 |                   |                 |                   |                 |                   |                 |                   |                         |
| 8.1 (5, 11.2)               |                                      |                                |                                   |                 |                   |                 |                   |                 |                   |                 |                   |                 |                   |                 |                   |                         |
| 8.7 (5.2, 12)               |                                      |                                |                                   |                 |                   |                 |                   |                 |                   |                 |                   |                 |                   |                 |                   |                         |
| 12 (10, 14.1)               |                                      |                                |                                   |                 |                   |                 |                   |                 |                   |                 |                   |                 |                   |                 |                   |                         |
| Hispanic                    |                                      |                                |                                   |                 |                   |                 |                   |                 |                   |                 |                   |                 |                   |                 |                   |                         |
| <i>N deaths</i>             |                                      |                                |                                   |                 |                   |                 |                   |                 |                   |                 |                   |                 |                   |                 |                   |                         |
| 2 (1, 2)                    |                                      |                                |                                   |                 |                   |                 |                   |                 |                   |                 |                   |                 |                   |                 |                   |                         |
| 2 (1, 3)                    |                                      |                                |                                   |                 |                   |                 |                   |                 |                   |                 |                   |                 |                   |                 |                   |                         |
| 9 (4, 13)                   |                                      |                                |                                   |                 |                   |                 |                   |                 |                   |                 |                   |                 |                   |                 |                   |                         |
| 4 (2, 5)                    |                                      |                                |                                   |                 |                   |                 |                   |                 |                   |                 |                   |                 |                   |                 |                   |                         |
| 21 (9, 32)                  |                                      |                                |                                   |                 |                   |                 |                   |                 |                   |                 |                   |                 |                   |                 |                   |                         |
| 16 (6, 21)                  |                                      |                                |                                   |                 |                   |                 |                   |                 |                   |                 |                   |                 |                   |                 |                   |                         |
| 41 (18, 61)                 |                                      |                                |                                   |                 |                   |                 |                   |                 |                   |                 |                   |                 |                   |                 |                   |                         |
| 28 (11, 42)                 |                                      |                                |                                   |                 |                   |                 |                   |                 |                   |                 |                   |                 |                   |                 |                   |                         |
| 52 (24, 76)                 |                                      |                                |                                   |                 |                   |                 |                   |                 |                   |                 |                   |                 |                   |                 |                   |                         |
| 14.4 (6.8, 21.1)            |                                      |                                |                                   |                 |                   |                 |                   |                 |                   |                 |                   |                 |                   |                 |                   |                         |
| 14.9 (6.6, 21.7)            |                                      |                                |                                   |                 |                   |                 |                   |                 |                   |                 |                   |                 |                   |                 |                   |                         |
| 105 (60, 143)               |                                      |                                |                                   |                 |                   |                 |                   |                 |                   |                 |                   |                 |                   |                 |                   |                         |
| 149 (87, 209)               |                                      |                                |                                   |                 |                   |                 |                   |                 |                   |                 |                   |                 |                   |                 |                   |                         |
| 464 (378, 544)              |                                      |                                |                                   |                 |                   |                 |                   |                 |                   |                 |                   |                 |                   |                 |                   |                         |
| <i>% OSTK</i>               |                                      |                                |                                   |                 |                   |                 |                   |                 |                   |                 |                   |                 |                   |                 |                   |                         |
| 25.2 (9.5, 37.7)            |                                      |                                |                                   |                 |                   |                 |                   |                 |                   |                 |                   |                 |                   |                 |                   |                         |
| 26.6 (11.5, 39.5)           |                                      |                                |                                   |                 |                   |                 |                   |                 |                   |                 |                   |                 |                   |                 |                   |                         |
| 25.7 (10.8, 37.2)           |                                      |                                |                                   |                 |                   |                 |                   |                 |                   |                 |                   |                 |                   |                 |                   |                         |
| 24.6 (11.1, 35.9)           |                                      |                                |                                   |                 |                   |                 |                   |                 |                   |                 |                   |                 |                   |                 |                   |                         |
| 21.5 (9.5, 31.9)            |                                      |                                |                                   |                 |                   |                 |                   |                 |                   |                 |                   |                 |                   |                 |                   |                         |
| 21.5 (8.8, 32.8)            |                                      |                                |                                   |                 |                   |                 |                   |                 |                   |                 |                   |                 |                   |                 |                   |                         |
| 17.4 (7.9, 26.2)            |                                      |                                |                                   |                 |                   |                 |                   |                 |                   |                 |                   |                 |                   |                 |                   |                         |
| 17.6 (6.8, 26.5)            |                                      |                                |                                   |                 |                   |                 |                   |                 |                   |                 |                   |                 |                   |                 |                   |                         |
| 14.4 (6.8, 21.1)            |                                      |                                |                                   |                 |                   |                 |                   |                 |                   |                 |                   |                 |                   |                 |                   |                         |
| 14.9 (6.1, 22.3)            |                                      |                                |                                   |                 |                   |                 |                   |                 |                   |                 |                   |                 |                   |                 |                   |                         |
| 8.4 (4.7, 11.8)             |                                      |                                |                                   |                 |                   |                 |                   |                 |                   |                 |                   |                 |                   |                 |                   |                         |
| 9.1 (5.3, 12.5)             |                                      |                                |                                   |                 |                   |                 |                   |                 |                   |                 |                   |                 |                   |                 |                   |                         |
| 105 (60, 143)               |                                      |                                |                                   |                 |                   |                 |                   |                 |                   |                 |                   |                 |                   |                 |                   |                         |
| 149 (87, 209)               |                                      |                                |                                   |                 |                   |                 |                   |                 |                   |                 |                   |                 |                   |                 |                   |                         |
| 464 (378, 544)              |                                      |                                |                                   |                 |                   |                 |                   |                 |                   |                 |                   |                 |                   |                 |                   |                         |
| Other                       |                                      |                                |                                   |                 |                   |                 |                   |                 |                   |                 |                   |                 |                   |                 |                   |                         |
| <i>N deaths</i>             |                                      |                                |                                   |                 |                   |                 |                   |                 |                   |                 |                   |                 |                   |                 |                   |                         |
| 0 (0, 0)                    |                                      |                                |                                   |                 |                   |                 |                   |                 |                   |                 |                   |                 |                   |                 |                   |                         |
| 0 (0, 1)                    |                                      |                                |                                   |                 |                   |                 |                   |                 |                   |                 |                   |                 |                   |                 |                   |                         |
| 2 (1, 3)                    |                                      |                                |                                   |                 |                   |                 |                   |                 |                   |                 |                   |                 |                   |                 |                   |                         |
| 1 (0, 2)                    |                                      |                                |                                   |                 |                   |                 |                   |                 |                   |                 |                   |                 |                   |                 |                   |                         |
| 13 (5, 19)                  |                                      |                                |                                   |                 |                   |                 |                   |                 |                   |                 |                   |                 |                   |                 |                   |                         |
| 13 (5, 19)                  |                                      |                                |                                   |                 |                   |                 |                   |                 |                   |                 |                   |                 |                   |                 |                   |                         |
| 22 (10, 34)                 |                                      |                                |                                   |                 |                   |                 |                   |                 |                   |                 |                   |                 |                   |                 |                   |                         |
| 22 (10, 34)                 |                                      |                                |                                   |                 |                   |                 |                   |                 |                   |                 |                   |                 |                   |                 |                   |                         |
| 15.8 (7.3, 24.3)            |                                      |                                |                                   |                 |                   |                 |                   |                 |                   |                 |                   |                 |                   |                 |                   |                         |
| 14.8 (6.7, 23.7)            |                                      |                                |                                   |                 |                   |                 |                   |                 |                   |                 |                   |                 |                   |                 |                   |                         |
| 38 (16, 57)                 |                                      |                                |                                   |                 |                   |                 |                   |                 |                   |                 |                   |                 |                   |                 |                   |                         |
| 12 (6, 20)                  |                                      |                                |                                   |                 |                   |                 |                   |                 |                   |                 |                   |                 |                   |                 |                   |                         |
| 14.9 (6.1, 22.3)            |                                      |                                |                                   |                 |                   |                 |                   |                 |                   |                 |                   |                 |                   |                 |                   |                         |
| 14.9 (6.1, 22.3)            |                                      |                                |                                   |                 |                   |                 |                   |                 |                   |                 |                   |                 |                   |                 |                   |                         |
| 8.4 (4.7, 12.2)             |                                      |                                |                                   |                 |                   |                 |                   |                 |                   |                 |                   |                 |                   |                 |                   |                         |
| 23 (12, 34)                 |                                      |                                |                                   |                 |                   |                 |                   |                 |                   |                 |                   |                 |                   |                 |                   |                         |
| 28 (12, 43)                 |                                      |                                |                                   |                 |                   |                 |                   |                 |                   |                 |                   |                 |                   |                 |                   |                         |
| 84 (43, 132)                |                                      |                                |                                   |                 |                   |                 |                   |                 |                   |                 |                   |                 |                   |                 |                   |                         |
| 7.2 (3.7, 11.3)             |                                      |                                |                                   |                 |                   |                 |                   |                 |                   |                 |                   |                 |                   |                 |                   |                         |
| 64 (36, 93)                 |                                      |                                |                                   |                 |                   |                 |                   |                 |                   |                 |                   |                 |                   |                 |                   |                         |
| 8.4 (4.7, 12.2)             |                                      |                                |                                   |                 |                   |                 |                   |                 |                   |                 |                   |                 |                   |                 |                   |                         |
| 9.9 (7.8, 12.3)             |                                      |                                |                                   |                 |                   |                 |                   |                 |                   |                 |                   |                 |                   |                 |                   |                         |
| 270 (213, 334)              |                                      |                                |                                   |                 |                   |                 |                   |                 |                   |                 |                   |                 |                   |                 |                   |                         |
| 7.2 (3.7, 11.3)             |                                      |                                |                                   |                 |                   |                 |                   |                 |                   |                 |                   |                 |                   |                 |                   |                         |
| 8.4 (4.7, 12.2)             |                                      |                                |                                   |                 |                   |                 |                   |                 |                   |                 |                   |                 |                   |                 |                   |                         |
| 9.9 (7.8, 12.3)             |                                      |                                |                                   |                 |                   |                 |                   |                 |                   |                 |                   |                 |                   |                 |                   |                         |
| 9.9 (7.8, 12.3)             |                                      |                                |                                   |                 |                   |                 |                   |                 |                   |                 |                   |                 |                   |                 |                   |                         |
| <b>Total</b>                |                                      |                                |                                   |                 |                   |                 |                   |                 |                   |                 |                   |                 |                   |                 |                   |                         |
| <i>N deaths</i>             |                                      |                                |                                   |                 |                   |                 |                   |                 |                   |                 |                   |                 |                   |                 |                   |                         |
| 12 (5, 17)                  |                                      |                                |                                   |                 |                   |                 |                   |                 |                   |                 |                   |                 |                   |                 |                   |                         |
| 11 (5, 16)                  |                                      |                                |                                   |                 |                   |                 |                   |                 |                   |                 |                   |                 |                   |                 |                   |                         |
| 55 (26, 82)                 |                                      |                                |                                   |                 |                   |                 |                   |                 |                   |                 |                   |                 |                   |                 |                   |                         |
| 41 (17, 60)                 |                                      |                                |                                   |                 |                   |                 |                   |                 |                   |                 |                   |                 |                   |                 |                   |                         |
| 210 (99, 309)               |                                      |                                |                                   |                 |                   |                 |                   |                 |                   |                 |                   |                 |                   |                 |                   |                         |
| 153 (67, 229)               |                                      |                                |                                   |                 |                   |                 |                   |                 |                   |                 |                   |                 |                   |                 |                   |                         |
| 516 (248, 762)              |                                      |                                |                                   |                 |                   |                 |                   |                 |                   |                 |                   |                 |                   |                 |                   |                         |
| 352 (137, 524)              |                                      |                                |                                   |                 |                   |                 |                   |                 |                   |                 |                   |                 |                   |                 |                   |                         |
| 789 (406, 1163)             |                                      |                                |                                   |                 |                   |                 |                   |                 |                   |                 |                   |                 |                   |                 |                   |                         |
| 666 (320, 1003)             |                                      |                                |                                   |                 |                   |                 |                   |                 |                   |                 |                   |                 |                   |                 |                   |                         |
| 1743 (1042, 2392)           |                                      |                                |                                   |                 |                   |                 |                   |                 |                   |                 |                   |                 |                   |                 |                   |                         |
| <i>% OSTK</i>               |                                      |                                |                                   |                 |                   |                 |                   |                 |                   |                 |                   |                 |                   |                 |                   |                         |
| 24.9 (10.6, 36.5)           |                                      |                                |                                   |                 |                   |                 |                   |                 |                   |                 |                   |                 |                   |                 |                   |                         |
| 24.9 (12.5, 35.4)           |                                      |                                |                                   |                 |                   |                 |                   |                 |                   |                 |                   |                 |                   |                 |                   |                         |
| 23.8 (11.2, 35.3)           |                                      |                                |                                   |                 |                   |                 |                   |                 |                   |                 |                   |                 |                   |                 |                   |                         |
| 23.8 (9.9, 35)              |                                      |                                |                                   |                 |                   |                 |                   |                 |                   |                 |                   |                 |                   |                 |                   |                         |
| 20.5 (9.7, 30.2)            |                                      |                                |                                   |                 |                   |                 |                   |                 |                   |                 |                   |                 |                   |                 |                   |                         |
| 20.7 (9, 30.8)              |                                      |                                |                                   |                 |                   |                 |                   |                 |                   |                 |                   |                 |                   |                 |                   |                         |
| 16.8 (8.1, 24.2)            |                                      |                                |                                   |                 |                   |                 |                   |                 |                   |                 |                   |                 |                   |                 |                   |                         |
| 17 (6.6, 25.3)              |                                      |                                |                                   |                 |                   |                 |                   |                 |                   |                 |                   |                 |                   |                 |                   |                         |
| 14.1 (7.3, 20.8)            |                                      |                                |                                   |                 |                   |                 |                   |                 |                   |                 |                   |                 |                   |                 |                   |                         |
| 14.1 (7.3, 20.8)            |                                      |                                |                                   |                 |                   |                 |                   |                 |                   |                 |                   |                 |                   |                 |                   |                         |
| 8.2 (4.9, 11.3)             |                                      |                                |                                   |                 |                   |                 |                   |                 |                   |                 |                   |                 |                   |                 |                   |                         |
| 8.1 (4.8, 11)               |                                      |                                |                                   |                 |                   |                 |                   |                 |                   |                 |                   |                 |                   |                 |                   |                         |
| 9.8 (7.8, 11.6)             |                                      |                                |                                   |                 |                   |                 |                   |                 |                   |                 |                   |                 |                   |                 |                   |                         |
| <b>Whole grains</b>         |                                      |                                |                                   |                 |                   |                 |                   |                 |                   |                 |                   |                 |                   |                 |                   |                         |
| <b>Diabetes</b>             |                                      |                                |                                   |                 |                   |                 |                   |                 |                   |                 |                   |                 |                   |                 |                   |                         |
| <b>Overall by age</b>       |                                      |                                |                                   |                 |                   |                 |                   |                 |                   |                 |                   |                 |                   |                 |                   |                         |
| <i>N deaths</i>             |                                      |                                |                                   |                 |                   |                 |                   |                 |                   |                 |                   |                 |                   |                 |                   |                         |
| 201 (143, 245)              |                                      |                                |                                   |                 |                   |                 |                   |                 |                   |                 |                   |                 |                   |                 |                   |                         |
| 555 (404, 690)              |                                      |                                |                                   |                 |                   |                 |                   |                 |                   |                 |                   |                 |                   |                 |                   |                         |
| 1512 (1059, 1892)           |                                      |                                |                                   |                 |                   |                 |                   |                 |                   |                 |                   |                 |                   |                 |                   |                         |
| 2678 (1904, 3420)           |                                      |                                |                                   |                 |                   |                 |                   |                 |                   |                 |                   |                 |                   |                 |                   |                         |
| 2986 (2128, 3799)           |                                      |                                |                                   |                 |                   |                 |                   |                 |                   |                 |                   |                 |                   |                 |                   |                         |
| 3732 (2726,                 |                                      |                                |                                   |                 |                   |                 |                   |                 |                   |                 |                   |                 |                   |                 |                   |                         |

**eTable 14. Absolute and proportional cardiometabolic disease mortality associated with suboptimal dietary habits in the US in 2012 by population subgroups (continued)**

| Dietary Factor <sup>a</sup>        | Cardiometabolic Disease <sup>b</sup> | Population strata <sup>c</sup> | Associated mortality <sup>d</sup> | Age                |                      |                    |                      |                    |                      |                      |                      |                    |                      |                                                                                    |                                                                                                 | Total (25+ y)<br>(95% UIs) |
|------------------------------------|--------------------------------------|--------------------------------|-----------------------------------|--------------------|----------------------|--------------------|----------------------|--------------------|----------------------|----------------------|----------------------|--------------------|----------------------|------------------------------------------------------------------------------------|-------------------------------------------------------------------------------------------------|----------------------------|
|                                    |                                      |                                |                                   | 25-34 y            |                      | 35-44 y            |                      | 45-54 y            |                      | 55-64 y              |                      | 65-74 y            |                      | 75+ y                                                                              |                                                                                                 |                            |
|                                    |                                      |                                |                                   | Males<br>(95% UIs) | Females<br>(95% UIs) | Males<br>(95% UIs) | Females<br>(95% UIs) | Males<br>(95% UIs) | Females<br>(95% UIs) | Males<br>(95% UIs)   | Females<br>(95% UIs) | Males<br>(95% UIs) | Females<br>(95% UIs) | Males<br>(95% UIs)                                                                 | Females<br>(95% UIs)                                                                            |                            |
| <b>Red meats</b><br>(>14.3 g/d)    | Diabetes                             | Overall by age                 | <i>N deaths</i>                   | 54 (20, 87)        | 158 (58, 257)        | 443 (163, 685)     | 645 (241, 1040)      | 766 (311, 1238)    | 826 (392, 1251)      |                      |                      |                    |                      | M: 1893 (1194, 2538)<br>F: 985 (600, 1381)<br>M: 5.3 (3.4, 7.1)<br>F: 3 (1.9, 4.3) |                                                                                                 |                            |
|                                    |                                      |                                | % <i>DM</i>                       | 9.1 (3.4, 14.5)    | 9.2 (3.3, 14.9)      | 8.2 (3, 12.7)      | 5.5 (2.1, 8.9)       | 5 (2, 8.1)         | 2.5 (1.2, 3.8)       |                      |                      |                    |                      |                                                                                    |                                                                                                 |                            |
|                                    |                                      | Education                      | <i>N deaths</i>                   | 7 (1, 14)          | 4 (1, 8)             | 37 (6, 62)         | 13 (1, 25)           | 80 (14, 150)       | 27 (5, 52)           | 101 (23, 184)        | 46 (9, 86)           | 129 (32, 262)      | 61 (11, 120)         | 113 (30, 201)                                                                      | 124 (35, 249)                                                                                   | 752 (543, 971)             |
|                                    |                                      | % <i>DM</i>                    | 9.1 (1.8, 17.5)                   | 6.3 (1.4, 13.5)    | 15.3 (2.6, 25.8)     | 9.4 (1.1, 18.4)    | 11.4 (2, 21.4)       | 6.5 (1.1, 12.4)    | 7.7 (1.7, 14)        | 5.1 (1, 9.5)         | 6.1 (1.5, 12.4)      | 3.6 (0.7, 7.2)     | 2.7 (0.7, 4.7)       | 2 (0.6, 4)                                                                         | 4.1 (3, 5.4)                                                                                    |                            |
|                                    |                                      | % <i>DM</i>                    | 27 (4, 48)                        | 13 (2, 24)         | 82 (22, 142)         | 31 (7, 57)         | 214 (30, 392)        | 93 (12, 175)       | 366 (69, 651)        | 120 (19, 224)        | 291 (49, 564)        | 153 (30, 289)      | 274 (87, 486)        | 229 (74, 421)                                                                      | 1900 (1395, 2436)                                                                               |                            |
|                                    |                                      | % <i>DM</i>                    | 11.7 (1.8, 20.8)                  | 7.6 (1.1, 14.1)    | 11.2 (3, 19.5)       | 6.9 (1.6, 12.8)    | 9.4 (1.3, 17.3)      | 6.7 (0.9, 12.6)    | 7.9 (1.5, 14)        | 4 (0.7, 7.5)         | 5.7 (1, 11)          | 3.8 (0.7, 7.1)     | 3.5 (1.1, 6.2)       | 2.2 (0.7, 4.1)                                                                     | 4.7 (3.5, 6.1)                                                                                  |                            |
|                                    |                                      | % <i>DM</i>                    | 3 (0, 6)                          | 1 (0, 2)           | 7 (2, 13)            | 2 (0, 4)           | 23 (3, 45)           | 9 (2, 17)          | 46 (7, 87)           | 14 (3, 30)           | 76 (15, 141)         | 28 (3, 57)         | 57 (14, 111)         | 24 (7, 56)                                                                         | 296 (200, 401)                                                                                  |                            |
|                                    |                                      | % <i>DM</i>                    | 10.2 (1.5, 20)                    | 4.6 (0.9, 10.2)    | 8.6 (1.9, 15.4)      | 3.9 (0.7, 7.8)     | 6.8 (1, 13.6)        | 4.9 (1.1, 9.6)     | 4.6 (0.7, 8.7)       | 2.7 (0.6, 5.7)       | 5.7 (1.1, 10.6)      | 4 (0.5, 8.2)       | 2.3 (0.6, 4.5)       | 1.6 (0.4, 3.7)                                                                     | 3.6 (2.4, 4.8)                                                                                  |                            |
|                                    |                                      | % <i>DM</i>                    | 20 (3, 37)                        | 9 (2, 16)          | 63 (15, 111)         | 22 (5, 41)         | 198 (34, 349)        | 70 (16, 130)       | 295 (64, 533)        | 92 (17, 181)         | 367 (58, 688)        | 163 (34, 301)      | 332 (98, 590)        | 274 (72, 492)                                                                      | 1911 (1360, 2499)                                                                               |                            |
|                                    |                                      | % <i>DM</i>                    | 10.5 (1.6, 19.6)                  | 6.8 (1.3, 12.9)    | 10.4 (2.5, 18.5)     | 5.7 (1.3, 11)      | 9.7 (1.7, 17)        | 6.1 (1.4, 11.3)    | 3.4 (0.6, 6.7)       | 6.2 (0.9, 11.2)      | 3.9 (0.8, 7.3)       | 2.9 (0.9, 5.2)     | 2.1 (0.6, 3.8)       | 4.1 (2.9, 5.4)                                                                     |                                                                                                 |                            |
|                                    |                                      | % <i>DM</i>                    | 9 (2, 18)                         | 7 (1, 12)          | 32 (7, 58)           | 14 (2, 27)         | 40 (7, 73)           | 30 (6, 58)         | 84 (14, 156)         | 54 (11, 101)         | 63 (8, 122)          | 48 (8, 97)         | 38 (13, 77)          | 77 (20, 154)                                                                       | 502 (365, 663)                                                                                  |                            |
|                                    |                                      | % <i>DM</i>                    | 9.6 (2.2, 19)                     | 8 (1.5, 15.3)      | 11.5 (2.6, 20.9)     | 7.7 (1.1, 14.9)    | 5.3 (1, 9.6)         | 5.3 (1.1, 10.3)    | 6.1 (1, 11.4)        | 4.9 (1, 9.3)         | 4.3 (0.6, 8.3)       | 3.5 (0.6, 7)       | 2.4 (0.8, 4.7)       | 2.6 (0.7, 5.2)                                                                     | 4.2 (3.1, 5.6)                                                                                  |                            |
|                                    |                                      | % <i>DM</i>                    | 6 (1, 10)                         | 2 (0, 3)           | 18 (5, 32)           | 5 (1, 9)           | 41 (9, 71)           | 13 (3, 27)         | 68 (16, 125)         | 26 (3, 51)           | 40 (8, 82)           | 24 (4, 54)         | 35 (10, 69)          | 321 (230, 419)                                                                     | 4.9 (3.5, 6.4)                                                                                  |                            |
|                                    |                                      | % <i>DM</i>                    | 11.4 (1.8, 20.4)                  | 5.9 (0.7, 11.3)    | 12.8 (3.4, 23.1)     | 7.5 (1.6, 13.6)    | 10.2 (2.3, 17.8)     | 6.2 (1.4, 12.5)    | 9.4 (2.2, 17.1)      | 5.3 (0.7, 10.4)      | 4.9 (0.9, 10)        | 3.5 (0.6, 7.8)     | 2.8 (0.8, 5.6)       | 2.2 (0.6, 4.7)                                                                     | 4.9 (3.5, 6.4)                                                                                  |                            |
|                                    |                                      | % <i>DM</i>                    | 1 (0, 2)                          | 1 (0, 1)           | 6 (1, 12)            | 1 (0, 2)           | 21 (3, 42)           | 4 (1, 10)          | 25 (5, 51)           | 8 (1, 18)            | 17 (3, 40)           | 8 (1, 18)          | 12 (6, 45)           | 15 (4, 31)                                                                         | 134 (92, 179)                                                                                   |                            |
|                                    |                                      | % <i>DM</i>                    | 11.9 (1.7, 23.4)                  | 4.2 (0.9, 8.8)     | 10.1 (1.8, 20.6)     | 4.8 (0.9, 9.5)     | 11.7 (1.9, 23.5)     | 4.7 (1, 10.6)      | 7.6 (1.4, 15.3)      | 4 (0.6, 8.5)         | 4.9 (0.7, 11.4)      | 2.5 (0.4, 5.5)     | 3.6 (1, 7.5)         | 2.1 (0.5, 4.2)                                                                     | 4.6 (3.1, 6.1)                                                                                  |                            |
|                                    |                                      | % <i>DM</i>                    | 37 (8, 67)                        | 16 (3, 30)         | 122 (23, 211)        | 39 (7, 71)         | 314 (64, 553)        | 122 (29, 225)      | 479 (102, 858)       | 167 (25, 304)        | 512 (94, 922)        | 253 (51, 456)      | 432 (124, 731)       | 386 (122, 689)                                                                     | 2869 (2091, 3694)                                                                               |                            |
|                                    |                                      | % <i>DM</i>                    | 10.7 (2.3, 19.5)                  | 6.5 (1.2, 12.1)    | 11.3 (2.2, 19.5)     | 6 (1.2, 11.1)      | 9.3 (1.9, 16.3)      | 6 (1.5, 11.1)      | 6.7 (1.4, 12)        | 3.7 (0.6, 6.8)       | 5.8 (1.1, 10.5)      | 3.9 (0.8, 7)       | 2.9 (0.8, 4.9)       | 2.1 (0.7, 3.7)                                                                     | 4.2 (3.1, 5.4)                                                                                  |                            |
|                                    | <b>Red meats</b><br>(>14.3 g/d)      | Cardiometabolic disease        | Overall by age                    | <i>N deaths</i>    | 54 (20, 87)          | 158 (58, 257)      | 443 (163, 685)       | 645 (241, 1040)    | 766 (311, 1238)      | 826 (392, 1251)      |                      |                    |                      |                                                                                    | M: 1893 (1194, 2538)<br>F: 985 (600, 1381)<br>M: 0.5 (0.3, 0.7)<br>F: 0.3 (0.2, 0.4)            |                            |
|                                    |                                      |                                | % <i>CMD</i>                      | 1.5 (0.5, 2.4)     | 1.3 (0.5, 2)         | 1 (0.4, 1.6)       | 0.7 (0.3, 1.2)       | 0.7 (0.3, 1.1)     | 0.2 (0.1, 0.3)       |                      |                      |                    |                      |                                                                                    |                                                                                                 |                            |
| Education                          |                                      |                                | <i>N deaths</i>                   | 7 (1, 14)          | 4 (1, 8)             | 37 (6, 62)         | 13 (1, 25)           | 80 (14, 150)       | 27 (5, 52)           | 101 (23, 184)        | 46 (9, 86)           | 129 (32, 262)      | 61 (11, 120)         | 113 (30, 201)                                                                      | 124 (35, 249)                                                                                   | 752 (543, 971)             |
|                                    |                                      | % <i>CMD</i>                   | 1.4 (0.3, 2.7)                    | 1.4 (0.3, 3.1)     | 2.2 (0.4, 3.8)       | 1.6 (0.2, 3.1)     | 1.4 (0.2, 2.6)       | 1 (0.2, 2)         | 1 (0.2, 1.8)         | 0.9 (0.2, 1.7)       | 0.8 (0.2, 1.7)       | 0.6 (0.1, 1.2)     | 0.2 (0.1, 0.4)       | 0.2 (0, 0.4)                                                                       | 0.4 (0.3, 0.6)                                                                                  |                            |
|                                    |                                      | % <i>CMD</i>                   | 27 (4, 48)                        | 13 (2, 24)         | 82 (22, 142)         | 31 (7, 57)         | 214 (30, 392)        | 93 (12, 175)       | 366 (69, 651)        | 120 (19, 224)        | 291 (49, 564)        | 153 (30, 289)      | 274 (87, 486)        | 229 (74, 421)                                                                      | 1900 (1395, 2436)                                                                               |                            |
|                                    |                                      | % <i>CMD</i>                   | 1.7 (0.3, 3)                      | 1.6 (0.2, 3)       | 1.4 (0.4, 2.5)       | 1.1 (0.3, 2.1)     | 1.1 (0.2, 2)         | 1 (0.1, 1.9)       | 1 (0.2, 1.8)         | 0.6 (0.1, 1.2)       | 0.7 (0.1, 1.4)       | 0.5 (0.1, 1)       | 0.3 (0.1, 0.5)       | 0.2 (0, 0.3)                                                                       | 0.5 (0.3, 0.6)                                                                                  |                            |
|                                    |                                      | % <i>CMD</i>                   | 3 (0, 6)                          | 1 (0, 2)           | 7 (2, 13)            | 2 (0, 4)           | 23 (3, 45)           | 9 (2, 17)          | 46 (7, 87)           | 14 (3, 30)           | 76 (15, 141)         | 28 (3, 57)         | 57 (14, 111)         | 24 (7, 56)                                                                         | 296 (200, 401)                                                                                  |                            |
|                                    |                                      | % <i>CMD</i>                   | 1.2 (0.2, 2.4)                    | 0.6 (0.1, 1.3)     | 0.8 (0.2, 1.4)       | 0.7 (0.1, 0.8)     | 0.7 (0.1, 1.4)       | 0.6 (0.1, 1.3)     | 0.5 (0.1, 1)         | 0.4 (0.1, 0.8)       | 0.6 (0.1, 1.2)       | 0.5 (0.1, 1.1)     | 0.1 (0, 0.3)         | 0.1 (0, 0.2)                                                                       | 0.3 (0.2, 0.4)                                                                                  |                            |
|                                    |                                      | % <i>CMD</i>                   | 20 (3, 37)                        | 9 (2, 16)          | 63 (15, 111)         | 22 (5, 41)         | 198 (34, 349)        | 70 (16, 130)       | 295 (64, 533)        | 92 (17, 181)         | 367 (58, 688)        | 163 (34, 301)      | 332 (98, 590)        | 274 (72, 492)                                                                      | 1911 (1360, 2499)                                                                               |                            |
|                                    |                                      | % <i>CMD</i>                   | 1.5 (0.2, 2.8)                    | 1.3 (0.2, 2.4)     | 1.3 (0.3, 2.2)       | 0.9 (0.2, 1.7)     | 1 (0.2, 1.8)         | 0.9 (0.2, 1.6)     | 0.7 (0.2, 1.3)       | 0.5 (0.1, 1)         | 0.7 (0.1, 1.2)       | 0.5 (0.1, 0.9)     | 0.2 (0.1, 0.4)       | 0.1 (0, 0.2)                                                                       | 0.3 (0.2, 0.5)                                                                                  |                            |
|                                    |                                      | % <i>CMD</i>                   | 9 (2, 18)                         | 7 (1, 12)          | 32 (7, 58)           | 14 (2, 27)         | 40 (7, 73)           | 30 (6, 58)         | 84 (14, 156)         | 54 (11, 101)         | 63 (8, 122)          | 48 (8, 97)         | 38 (13, 77)          | 77 (20, 154)                                                                       | 502 (365, 663)                                                                                  |                            |
|                                    |                                      | % <i>CMD</i>                   | 1.5 (0.3, 3)                      | 1.8 (0.3, 3.4)     | 1.5 (0.3, 2.8)       | 1.2 (0.2, 2.3)     | 0.7 (0.1, 1.2)       | 0.8 (0.2, 1.6)     | 0.8 (0.1, 1.5)       | 0.8 (0.2, 1.6)       | 0.6 (0.1, 1.3)       | 0.6 (0.1, 1.3)     | 0.3 (0.1, 0.6)       | 0.3 (0.1, 0.7)                                                                     | 0.6 (0.4, 0.8)                                                                                  |                            |
|                                    |                                      | % <i>CMD</i>                   | 6 (1, 10)                         | 2 (0, 3)           | 18 (5, 32)           | 5 (1, 9)           | 41 (9, 71)           | 13 (3, 27)         | 68 (16, 125)         | 26 (3, 51)           | 40 (8, 82)           | 24 (4, 54)         | 35 (10, 69)          | 321 (230, 419)                                                                     | 4.9 (3.5, 6.4)                                                                                  |                            |
|                                    |                                      | % <i>CMD</i>                   | 1.8 (0.3, 3.1)                    | 1.3 (0.2, 2.6)     | 1.8 (0.5, 3.2)       | 1.3 (0.3, 2.4)     | 1.6 (0.4, 2.9)       | 1.3 (0.3, 2.6)     | 1.6 (0.4, 3)         | 1.2 (0.2, 2.4)       | 0.9 (0.2, 1.8)       | 0.8 (0.1, 1.8)     | 0.4 (0.1, 0.7)       | 0.3 (0.1, 0.6)                                                                     | 0.8 (0.5, 1)                                                                                    |                            |
|                                    |                                      | % <i>CMD</i>                   | 1 (0, 2)                          | 1 (0, 1)           | 6 (1, 12)            | 1 (0, 2)           | 21 (3, 42)           | 4 (1, 10)          | 25 (5, 51)           | 8 (1, 18)            | 17 (3, 40)           | 8 (1, 18)          | 12 (6, 45)           | 15 (4, 31)                                                                         | 134 (92, 179)                                                                                   |                            |
|                                    |                                      | % <i>CMD</i>                   | 0.9 (0.1, 1.8)                    | 0.7 (0.2, 1.6)     | 1.3 (0.2, 2.7)       | 0.5 (0.1, 1)       | 1.7 (0.3, 3.4)       | 0.9 (0.2, 2.1)     | 1.2 (0.2, 2.4)       | 0.8 (0.1, 1.6)       | 0.7 (0.1, 1.6)       | 0.5 (0.1, 1.1)     | 0.4 (0.1, 0.8)       | 0.6 (0.4, 0.8)                                                                     | 4.6 (3.1, 6.1)                                                                                  |                            |
|                                    |                                      | % <i>CMD</i>                   | 37 (8, 67)                        | 16 (3, 30)         | 122 (23, 211)        | 39 (7, 71)         | 314 (64, 553)        | 122 (29, 225)      | 479 (102, 858)       | 167 (25, 304)        | 512 (94, 922)        | 253 (51, 456)      | 432 (124, 731)       | 386 (122, 689)                                                                     | 2869 (2091, 3694)                                                                               |                            |
|                                    |                                      | % <i>CMD</i>                   | 1.5 (0.3, 2.8)                    | 1.3 (0.2, 2.4)     | 1.4 (0.3, 2.5)       | 0.9 (0.2, 1.7)     | 1.1 (0.2, 1.9)       | 0.9 (0.2, 1.7)     | 0.8 (0.2, 1.5)       | 0.6 (0.1, 1.1)       | 0.7 (0.1, 1.3)       | 0.6 (0.1, 1)       | 0.2 (0.1, 0.4)       | 0.2 (0, 0.3)                                                                       | 0.4 (0.3, 0.5)                                                                                  |                            |
| <b>Processed meats</b><br>(>0 g/d) |                                      | Coronary heart disease         | Overall by age                    | <i>N deaths</i>    | 293 (141, 437)       | 1474 (732, 2092)   | 5447 (2514, 8045)    | 9224 (4397, 13693) | 11126 (5692, 16226)  | 18146 (11067, 25770) |                      |                    |                      |                                                                                    | M: 31109 (21636, 40741)<br>F: 14667 (8935, 19943)<br>M: 15.1 (10.5, 19.7)<br>F: 8.9 (5.4, 12.1) |                            |
|                                    |                                      |                                | % <i>CHD</i>                      | 28.6 (13.7, 42.6)  | 28.5 (14.1, 40.4)    | 24.9 (11.5, 36.7)  | 19.3 (9.2, 28.7)     | 17.7 (9.1, 25.8)   | 7.8 (4.8, 11.1)      |                      |                      |                    |                      |                                                                                    |                                                                                                 |                            |
|                                    | Education                            |                                | <i>N deaths</i>                   | 53 (17, 89)        | 13 (4, 21)           | 165 (60, 290)      | 63 (22, 105)         | 859 (274, 1401)    | 170 (63, 287)        | 1279 (442, 2082)     | 414 (125, 736)       | 1779 (653, 2883)   | 606 (203, 1064)      | 3199 (1362, 5426)                                                                  | 2545 (991, 4233)                                                                                | 11267 (8446, 14434)        |
|                                    |                                      | % <i>CHD</i>                   | 31.3 (10.2, 52.4)                 | 22.1 (6.9, 37.2)   | 22.5 (8.2, 39.5)     | 21.6 (7.7, 35.7)   | 26.9 (8.6, 43.9)     | 21.4 (4.4, 34.7)   | 20.8 (7.4, 34.7)     | 17 (5.1, 30.2)       | 12.6 (4.2, 22.1)     | 11.7 (5, 19.8)     | 7.4 (2.9, 12.3)      | 11.7 (9, 15.8)                                                                     | 12.6 (9.4, 16.1)                                                                                |                            |
|                                    |                                      | % <i>CHD</i>                   | 167 (68, 260)                     | 40 (13, 63)        | 896 (285, 1418)      | 229 (84, 366)      | 3089 (1107, 4836)    | 885 (275, 1430)    | 5124 (883, 7965)     | 1346 (483, 2187)     | 5323 (1919, 8743)    | 1961 (686, 3234)   | 4701 (2006, 7540)    | 28619 (21893, 35438)                                                               |                                                                                                 |                            |
|                                    |                                      | % <i>CHD</i>                   | 32.5 (13.3, 50.7)                 | 23.4 (7.7, 36.9)   | 34 (10.8, 53.8)      | 25.3 (9.3, 40.5)   | 28.3 (10.1, 44.3)    | 23.6 (7.4, 38.2)   | 22.8 (9.3, 36.1)     | 15.4 (5.5, 25)       | 21.7 (7.8, 35.6)     | 14.5 (5.1, 23.9)   | 8.1 (3.5, 13)        | 6.7 (2.9, 10.7)                                                                    | 13 (10, 16.1)                                                                                   |                            |

**eTable 14. Absolute and proportional cardiometabolic disease mortality associated with suboptimal dietary habits in the US in 2012 by population subgroups (continued)**

| Dietary Factor <sup>a</sup>         | Cardiometabolic Disease <sup>b</sup> | Population strata <sup>c</sup> | Associated mortality <sup>d</sup> | Age                                 |                                   |                                        |                                    |                                        |                                        |                                         |                                      |                                         |                                      |                                        |                                           | Total (25+ y)<br>(95% UIs)                                                                                                 |
|-------------------------------------|--------------------------------------|--------------------------------|-----------------------------------|-------------------------------------|-----------------------------------|----------------------------------------|------------------------------------|----------------------------------------|----------------------------------------|-----------------------------------------|--------------------------------------|-----------------------------------------|--------------------------------------|----------------------------------------|-------------------------------------------|----------------------------------------------------------------------------------------------------------------------------|
|                                     |                                      |                                |                                   | 25-34 y                             |                                   | 35-44 y                                |                                    | 45-54 y                                |                                        | 55-64 y                                 |                                      | 65-74 y                                 |                                      | 75+ y                                  |                                           |                                                                                                                            |
|                                     |                                      |                                |                                   | Males<br>(95% UIs)                  | Females<br>(95% UIs)              | Males<br>(95% UIs)                     | Females<br>(95% UIs)               | Males<br>(95% UIs)                     | Females<br>(95% UIs)                   | Males<br>(95% UIs)                      | Females<br>(95% UIs)                 | Males<br>(95% UIs)                      | Females<br>(95% UIs)                 | Males<br>(95% UIs)                     | Females<br>(95% UIs)                      |                                                                                                                            |
|                                     |                                      | College                        | <i>N deaths</i><br>% <i>CHD</i>   | 21 (8, 34)<br>28 (10.1, 45.5)       | 7 (2, 11)<br>20.3 (6.6, 33.2)     | 128 (41, 204)<br>30.7 (9.6, 48.7)      | 21 (7, 37)<br>15.7 (6, 30.5)       | 439 (180, 701)<br>23.6 (9.6, 37.6)     | 82 (25, 143)<br>16.6 (5.2, 28.9)       | 956 (384, 1657)<br>17.5 (7.3, 30.4)     | 174 (62, 300)<br>10.8 (3.8, 18.7)    | 1079 (410, 1806)<br>15.3 (5.8, 25.7)    | 290 (89, 509)<br>13 (4, 22.8)        | 2025 (881, 3396)<br>9.3 (4, 15.6)      | 578 (240, 1088)<br>4.7 (1.9, 8.8)         | 5894 (4221, 7599)<br>11 (7.9, 14.2)                                                                                        |
|                                     | <b>Race</b>                          | White                          | <i>N deaths</i><br>% <i>CHD</i>   | 153 (57, 233)<br>32.8 (12.2, 49.9)  | 38 (14, 61)<br>23.8 (8.8, 37.8)   | 847 (310, 1256)<br>33.5 (12.3, 49.7)   | 203 (74, 319)<br>22.1 (8, 34.6)    | 3296 (1160, 5036)<br>27.6 (9.7, 42.2)  | 794 (267, 1331)<br>20.9 (7, 35.1)      | 5450 (2270, 8714)<br>20.9 (8.7, 33.4)   | 1362 (427, 2280)<br>14.9 (4.7, 25)   | 6480 (2458, 10527)<br>14.1 (5.5, 23.4)  | 2227 (873, 3699)<br>14.1 (5.2, 23.4) | 9001 (4091, 14390)<br>9.6 (4.4, 15.4)  | 6930 (3004, 10891)<br>6.7 (2.9, 10.6)     | 36879 (28298, 46226)<br>12.3 (9.4, 15.4)                                                                                   |
|                                     |                                      | Black                          | <i>N deaths</i><br>% <i>CHD</i>   | 54 (21, 93)<br>31 (12.1, 53.5)      | 19 (7, 31)<br>27 (9.9, 43)        | 227 (84, 356)<br>30.2 (11.2, 47.3)     | 74 (22, 120)<br>26.2 (7.8, 42.6)   | 781 (318, 1196)<br>30.3 (12.3, 46.4)   | 241 (95, 405)<br>19.3 (7.6, 32.4)      | 1282 (503, 2049)<br>25 (9.8, 40)        | 468 (167, 759)<br>17.4 (6.2, 28.2)   | 1267 (450, 2311)<br>26.2 (9.3, 47.8)    | 473 (175, 787)<br>14.4 (5.3, 23.9)   | 681 (295, 1041)<br>4.4 (1.4, 14.4)     | 1034 (444, 1694)<br>9.7 (4.2, 15.9)       | 6570 (5137, 8267)<br>16.9 (13.2, 21.2)                                                                                     |
|                                     |                                      | Hispanic                       | <i>N deaths</i><br>% <i>CHD</i>   | 23 (9, 37)<br>28.8 (11.1, 47.1)     | 4 (1, 6)<br>18.4 (6.7, 31.1)      | 92 (29, 150)<br>26.4 (8.4, 43)         | 17 (6, 28)<br>18.6 (6.4, 30.6)     | 280 (94, 476)<br>16.3 (5.4, 26.8)      | 57 (19, 93)<br>16.6 (7.5, 26.9)        | 371 (167, 601)<br>8.7 (2.7, 15)         | 75 (24, 131)<br>8 (3, 14.2)          | 405 (154, 707)<br>7.2 (3.0, 12.1)       | 93 (30, 158)<br>8 (3, 14.2)          | 433 (165, 767)<br>9.5 (6.3, 15.5)      | 249 (113, 441)<br>3.9 (1.8, 6.9)          | 2130 (1589, 2692)<br>10.3 (7.7, 13)                                                                                        |
|                                     |                                      | Other                          | <i>N deaths</i><br>% <i>CHD</i>   | 13 (5, 20)<br>29 (10.8, 46.3)       | 2 (1, 4)<br>23.2 (7.8, 39.3)      | 55 (20, 94)<br>26.2 (9.3, 44.5)        | 8 (2, 14)<br>16.9 (5.1, 31.4)      | 104 (32, 201)<br>15.6 (4.7, 30.1)      | 15 (4, 28)<br>13 (4.8, 24)             | 155 (57, 286)<br>9.8 (2.9, 18.4)        | 30 (7, 59)<br>7.3 (1.8, 14.1)        | 255 (73, 489)<br>18.4 (5.3, 35.4)       | 80 (12, 184)<br>11.5 (1.7, 26.4)     | 197 (23, 496)<br>9.5 (6.3, 15.5)       | 117 (11, 299)<br>3.5 (0.3, 9)             | 1067 (713, 1740)<br>9.5 (6.3, 15.5)                                                                                        |
|                                     | <b>Total</b>                         |                                | <i>N deaths</i><br>% <i>CHD</i>   | 234 (93, 372)<br>30.7 (12.2, 48.8)  | 58 (25, 94)<br>22.3 (9.5, 35.9)   | 1190 (468, 1786)<br>31 (12.2, 46.5)    | 289 (97, 460)<br>21.6 (7.2, 34.3)  | 4332 (1501, 6767)<br>26.5 (9.2, 41.3)  | 1108 (409, 1798)<br>20 (7.4, 32.4)     | 7361 (2690, 11785)<br>21.3 (7.8, 34.1)  | 1837 (538, 3067)<br>14 (4.1, 23.4)   | 8235 (3049, 13182)<br>19.7 (7.3, 31.6)  | 2873 (887, 4626)<br>9.1 (3.8, 14.4)  | 9982 (4099, 15723)<br>6.8 (2.8, 10.8)  | 45637 (35048, 56391)<br>12.3 (9.4, 15.2)  | <b>M: 7533 (6020, 9189)</b><br><b>F: 4358 (3369, 5347)</b><br><b>M: 21.2 (16.9, 25.8)</b><br><b>F: 13.5 (10.4, 16.5)</b>   |
| <b>Processed meats (&gt;0 g/d)</b>  | <b>Diabetes</b>                      | <b>Overall by age</b>          | <i>N deaths</i><br>% <i>DM</i>    | 207 (143, 263)<br>34.6 (23.9, 44)   |                                   | 591 (394, 762)<br>34.3 (22.8, 44.2)    |                                    | 1635 (1081, 2170)<br>30.2 (20, 40.1)   |                                        | 2747 (1757, 3618)<br>23.6 (15.1, 31)    |                                      | 3419 (2306, 4574)<br>22.3 (15, 29.8)    |                                      | 3334 (2393, 4345)<br>10 (7.2, 13.1)    |                                           |                                                                                                                            |
|                                     | <b>Education</b>                     | <High-school                   | <i>N deaths</i><br>% <i>DM</i>    | 32 (18, 48)<br>39.7 (22.3, 59.5)    | 16 (8, 24)<br>28.9 (14.8, 42.5)   | 71 (35, 107)<br>29.2 (14.7, 44.4)      | 37 (20, 54)<br>27.2 (15, 40.3)     | 243 (124, 350)<br>34.8 (17.8, 50.1)    | 78 (41, 118)<br>18.6 (9.9, 27.9)       | 355 (196, 530)<br>27 (14.9, 40.4)       | 199 (106, 301)<br>22 (11.7, 33.4)    | 542 (302, 774)<br>25.6 (14.3, 36.6)     | 276 (135, 430)<br>16.3 (8, 25.5)     | 671 (388, 962)<br>8.2 (4.5, 13.8)      | 586 (332, 884)<br>9.4 (5.3, 14.2)         | 3124 (2565, 3685)<br>17.2 (14.2, 20.3)                                                                                     |
|                                     |                                      | High-school                    | <i>N deaths</i><br>% <i>DM</i>    | 97 (58, 135)<br>41.6 (25, 58.2)     | 51 (29, 72)<br>29.6 (16.7, 42.1)  | 315 (180, 422)<br>43.1 (24.6, 57.7)    | 142 (75, 199)<br>33.6 (17.7, 47.6) | 813 (470, 1125)<br>35.9 (20.8, 49.6)   | 419 (218, 612)<br>30.2 (15.7, 44.1)    | 1299 (747, 1901)<br>28 (16.1, 41)       | 585 (316, 848)<br>19.7 (10.6, 28.5)  | 1426 (768, 2091)<br>27.8 (16.6, 37.2)   | 752 (386, 1099)<br>18.5 (9.6, 27.2)  | 828 (482, 1175)<br>9.1 (4.9, 13.3)     | 897 (530, 1338)<br>10.6 (6.2, 15.1)       | 7641 (6458, 8915)<br>19.1 (16.1, 22.2)                                                                                     |
|                                     |                                      | College                        | <i>N deaths</i><br>% <i>DM</i>    | 11 (6, 16)<br>35.4 (18.3, 52.2)     | 6 (3, 8)<br>26.4 (14.1, 38)       | 33 (18, 46)<br>38.3 (20.8, 53.3)       | 11 (5, 16)<br>22.7 (11.3, 34)      | 100 (55, 146)<br>30 (16.6, 43.7)       | 39 (20, 60)<br>21.8 (11.2, 33.4)       | 231 (117, 342)<br>23 (11.7, 34)         | 75 (36, 121)<br>14.3 (6.8, 23.2)     | 265 (134, 397)<br>19.9 (10.1, 29.8)     | 112 (52, 189)<br>16.2 (7.5, 27.4)    | 296 (162, 438)<br>11.9 (6.5, 17.7)     | 98 (50, 157)<br>6.3 (3.3, 10.2)           | 1283 (1058, 1531)<br>15.5 (12.8, 18.5)                                                                                     |
|                                     | <b>Race</b>                          | White                          | <i>N deaths</i><br>% <i>DM</i>    | 77 (44, 109)<br>40.3 (23.1, 57.1)   | 39 (21, 53)<br>30.4 (16.6, 42.1)  | 246 (153, 339)<br>40.9 (25.4, 56.3)    | 105 (60, 148)<br>27 (15, 39.2)     | 719 (425, 986)<br>35 (20.7, 48)        | 311 (163, 454)<br>27 (14.1, 39.4)      | 1276 (680, 1853)<br>27 (14.9, 40.4)     | 515 (270, 758)<br>22 (11.7, 33.4)    | 1573 (883, 2253)<br>25.6 (14.3, 36.6)   | 735 (400, 1083)<br>16.3 (8, 25.5)    | 1434 (813, 1994)<br>8.2 (4.5, 13.8)    | 1137 (632, 1632)<br>9.4 (5.3, 14.2)       | 8186 (6772, 9451)<br>17.6 (14.5, 20.3)                                                                                     |
|                                     |                                      | Black                          | <i>N deaths</i><br>% <i>DM</i>    | 40 (21, 57)<br>41.2 (21.6, 59.6)    | 28 (16, 40)<br>34.3 (19.2, 49)    | 108 (60, 148)<br>38.8 (21.5, 53)       | 61 (32, 87)<br>33.6 (17.7, 47.6)   | 287 (173, 400)<br>31.4 (15.8, 44.7)    | 138 (76, 198)<br>24.6 (13.6, 35.2)     | 431 (217, 614)<br>22.2 (12.4, 32.6)     | 1242 (135, 355)<br>34.9 (16.9, 53)   | 514 (248, 780)<br>27.8 (16.6, 37.2)     | 265 (141, 387)<br>18.5 (9.6, 27.2)   | 193 (120, 274)<br>9.1 (4.9, 13.3)      | 367 (205, 552)<br>12.5 (7.3, 16.8)        | 2674 (2199, 3152)<br>22.6 (18.6, 26.6)                                                                                     |
|                                     |                                      | Hispanic                       | <i>N deaths</i><br>% <i>DM</i>    | 19 (10, 26)<br>37.3 (19.9, 52)      | 7 (4, 11)<br>23.6 (12.9, 36.1)    | 46 (23, 65)<br>32.9 (16.8, 46.7)       | 16 (8, 24)<br>24.4 (12.9, 36.9)    | 120 (59, 182)<br>29.9 (14.7, 45.3)     | 43 (24, 66)<br>19.8 (11.1, 30.4)       | 155 (82, 221)<br>21.3 (11.3, 30.3)      | 55 (29, 85)<br>11.2 (6, 17.4)        | 176 (94, 272)<br>21.3 (11.4, 33)        | 64 (32, 98)<br>9.2 (4.6, 14)         | 133 (65, 213)<br>5.2 (2.7, 8.1)        | 86 (46, 135)<br>10.8 (5.3, 17.2)          | 925 (757, 1086)<br>14.1 (11.6, 16.6)                                                                                       |
|                                     |                                      | Other                          | <i>N deaths</i><br>% <i>DM</i>    | 4 (2, 5)<br>37.8 (18.9, 54.7)       | 4 (2, 6)<br>29.2 (14.2, 47.1)     | 19 (10, 30)<br>32.2 (17.1, 49.9)       | 4 (2, 7)<br>21.9 (11, 36.2)        | 39 (17, 64)<br>21.8 (9.3, 36.2)        | 12 (6, 20)<br>13.1 (6.3, 21.5)         | 56 (23, 94)<br>16.7 (6.8, 28)           | 19 (8, 36)<br>9.3 (3.7, 17.2)        | 84 (37, 146)<br>22.3 (12.6, 31.94)      | 51 (7, 102)<br>15.8 (2.3, 31.6)      | 53 (10, 132)<br>8.9 (1.7, 22)          | 33 (0, 75)<br>1742 (1077, 2470)           | 385 (283, 823)<br>13.1 (9.7, 28.1)                                                                                         |
|                                     | <b>Total</b>                         |                                | <i>N deaths</i><br>% <i>DM</i>    | 135 (74, 186)<br>39 (21.3, 53.6)    | 72 (39, 99)<br>28.6 (15.4, 39.3)  | 415 (233, 568)<br>38.4 (21.5, 52.6)    | 177 (99, 250)<br>27.6 (15.4, 38.8) | 1126 (631, 1583)<br>33.2 (18.6, 46.7)  | 1918 (1009, 2728)<br>25.5 (13.8, 37.5) | 1918 (1009, 2728)<br>26.8 (14.1, 38.1)  | 824 (435, 1228)<br>18.3 (9.7, 27.3)  | 2223 (1265, 3194)<br>25.3 (14.4, 36.4)  | 1172 (655, 1727)<br>17.9 (10, 26.4)  | 1608 (983, 2277)<br>11.8 (7.3, 16.7)   | 11900 (10070, 13833)<br>17.5 (14.8, 20.4) | <b>M: 38632 (29036, 48341)</b><br><b>F: 18900 (13142, 24344)</b><br><b>M: 10.8 (8.1, 13.5)</b><br><b>F: 5.5 (3.8, 7.1)</b> |
| <b>Processed meats (&gt;0 g/d)</b>  | <b>Cardiometabolic disease</b>       | <b>Overall by age</b>          | <i>N deaths</i><br>% <i>CMD</i>   | 499 (337, 649)<br>13.6 (9.2, 17.7)  |                                   | 2071 (1289, 2700)<br>16.5 (10.3, 21.5) |                                    | 7098 (4176, 9824)<br>16.8 (9.9, 23.2)  |                                        | 11935 (7081, 16481)<br>13.9 (8.2, 19.1) |                                      | 14579 (9133, 19766)<br>12.7 (7.9, 17.2) |                                      | 21562 (14274, 29161)<br>4.9 (3.2, 6.6) |                                           |                                                                                                                            |
|                                     | <b>Education</b>                     | <High-school                   | <i>N deaths</i><br>% <i>CMD</i>   | 85 (46, 124)<br>16.2 (8.7, 23.7)    | 29 (18, 41)<br>11.6 (7.2, 16.3)   | 237 (123, 372)<br>14.3 (7.5, 22.5)     | 100 (55, 145)<br>12.4 (6.8, 17.9)  | 1101 (514, 1650)<br>19.1 (8.9, 28.7)   | 249 (132, 377)<br>9.5 (5, 14.3)        | 1633 (794, 2459)<br>16 (7.8, 24.1)      | 623 (307, 942)<br>12.1 (6, 18.3)     | 2314 (1198, 3449)<br>15.1 (7.8, 22.4)   | 882 (449, 1378)<br>8.8 (4.5, 13.8)   | 3883 (1991, 6001)<br>4.5 (2.3, 7)      | 3137 (1580, 4868)<br>4.5 (2.3, 7)         | 14393 (11464, 17620)<br>8.5 (6.8, 10.4)                                                                                    |
|                                     |                                      | High-school                    | <i>N deaths</i><br>% <i>CMD</i>   | 263 (153, 365)<br>16.4 (9.5, 22.7)  | 90 (56, 122)<br>11.1 (6.9, 15)    | 1212 (572, 1744)<br>21.1 (10, 30.4)    | 369 (214, 518)<br>13.6 (7.9, 19.1) | 3942 (1880, 5677)<br>20.5 (9.8, 29.5)  | 1303 (663, 1878)<br>14.4 (7.3, 20.7)   | 6359 (3162, 9383)<br>17.1 (8.5, 25.2)   | 3154 (1587, 4743)<br>10.5 (5.4, 15)  | 6729 (3343, 10257)<br>16.2 (8.1, 24.7)  | 2701 (1339, 4007)<br>9.5 (4.7, 14.2) | 5556 (2854, 8413)<br>6.77 (3.33, 1200) | 36272 (29335, 43168)<br>3.9 (2.1, 5.8)    | 8.7 (7.1, 10.4)                                                                                                            |
|                                     |                                      | College                        | <i>N deaths</i><br>% <i>CMD</i>   | 32 (18, 46)<br>12.2 (6.8, 17.4)     | 12 (7, 17)<br>7.5 (4, 10.6)       | 162 (73, 238)<br>17.2 (7.7, 25.3)      | 32 (18, 49)<br>6.7 (3.7, 10.1)     | 542 (272, 804)<br>16.5 (8.3, 24.5)     | 122 (61, 181)<br>9 (4.5, 13.3)         | 1918 (1009, 2728)<br>13 (6.4, 20.6)     | 250 (124, 388)<br>6.9 (3.5, 10.8)    | 1348 (653, 2078)<br>11.1 (5.4, 17.2)    | 406 (188, 644)<br>8 (3.7, 12.7)      | 2328 (1147, 3701)<br>6 (3, 9.6)        | 677 (333, 1200)<br>2.5 (1.2, 4.4)         | 7 (5.4, 8.7)                                                                                                               |
|                                     | <b>Race</b>                          | White                          | <i>N deaths</i><br>% <i>CMD</i>   | 229 (130, 321)<br>17 (9.7, 23.9)    | 76 (48, 103)<br>11.4 (7.1, 15.3)  | 1096 (551, 1520)<br>22.1 (11.1, 30.7)  | 306 (167, 432)<br>12.9 (7, 18.2)   | 4030 (1939, 5752)<br>20.8 (10, 29.7)   | 1105 (516, 1656)<br>13.6 (6.3, 20.4)   | 6771 (3491, 9955)<br>10.4 (4.9, 15.6)   | 1883 (887, 2829)<br>17.2 (8.4, 23.9) | 8016 (3791, 12298)<br>14.8 (7, 22.7)    | 2950 (1609, 4386)<br>9.2 (5, 13.7)   | 10373 (5365, 15684)<br>6.5 (3.4, 9.8)  | 8062 (4011, 12128)<br>3.8 (1.9, 5.8)      | 45100 (35973, 54220)<br>8.2 (6.5, 9.8)                                                                                     |
|                                     |                                      | Black                          | <i>N deaths</i><br>% <i>CMD</i>   | 94 (55, 134)<br>15.3 (9, 21.9)      | 47 (29, 64)<br>12.9 (8.1, 17.7)   | 332 (183, 471)<br>16.1 (8.9, 22.8)     | 193 (78, 188)<br>11.7 (6.8, 16.3)  | 3942 (1880, 5677)<br>18.2 (9.9, 25.2)  | 1071 (586, 1490)<br>10.3 (5.8, 14.9)   | 1712 (856, 2503)<br>16.5 (8.3, 24.1)    | 717 (378, 1020)<br>11.1 (5.8, 15.7)  | 1807 (867, 2867)<br>18.6 (9.9, 29.5)    | 736 (430, 1088)<br>9.7 (5.7, 14.4)   | 868 (473, 1251)<br>6.3 (3.4, 9)        | 9258 (7739, 10980)<br>6.1 (3.4, 9.3)      | 8.2 (6.5, 9.8)                                                                                                             |
|                                     |                                      | Hispanic                       | <i>N deaths</i><br>% <i>CMD</i>   | 41 (24, 57)<br>12.6 (7.5, 17.5)     | 19 (11, 27)<br>8.1 (5, 11.6)      | 139 (72, 197)<br>13.9 (7.2, 19.7)      | 11 (7, 16)<br>8.8 (5.5, 12.3)      | 396 (206, 611)<br>15.8 (8.2, 24.4)     | 100 (59, 143)<br>12.5 (7.6, 18.1)      | 526 (317, 761)<br>21.0 (11.1, 34.2)     | 131 (73, 190)<br>6.3 (3.5, 9.1)      | 586 (304, 888)<br>12.8 (6.7, 19.5)      | 339 (194, 541)<br>5.1 (2.9, 7.5)     | 3047 (2478, 3635)<br>152 (41, 362)     | 6.1 (3.4, 9.3)<br>2.6 (1.5, 4.2)          | 3047 (2478, 3635)<br>7.3 (5.9, 8.7)                                                                                        |
|                                     |                                      | Other                          | <i>N deaths</i><br>% <i>CMD</i>   | 17 (8, 24)<br>12.5 (6.2, 18.3)      | 6 (4, 9)<br>8.4 (5, 12.3)         | 76 (40, 114)<br>16.7 (8.8, 25.2)       | 12 (6, 19)<br>6.9 (3.5, 11.1)      | 142 (68, 247)<br>11.5 (5.5, 20)        | 28 (15, 43)<br>9.7 (5.1, 15.8)         | 210 (111, 342)<br>9.2 (4.7, 22.6)       | 50 (24, 91)<br>4.7 (2.2, 7.6)        | 341 (141, 580)<br>13.5 (6, 22.9)        | 452 (143, 256)<br>7.9 (2.6, 15.3)    | 152 (41, 362)<br>4.4 (1.4, 13)         | 1454 (1094, 2250)<br>2.2 (0.6, 5.1)       | 5.4 (4.8, 9.9)<br>6.4 (4.8, 9.9)                                                                                           |
|                                     | <b>Total</b>                         |                                | <i>N deaths</i><br>% <i>CMD</i>   | 370 (208, 515)<br>15.3 (8.6, 21.3)  | 130 (84, 176)<br>10.5 (6.8, 14.2) | 1604 (854, 2242)<br>18.9 (10.1, 26.5)  | 463 (268, 662)<br>11.4 (6.6, 16.2) | 5454 (2593, 8016)<br>18.8 (8.9, 27.7)  | 1617 (888, 2379)<br>12.1 (6.7, 17.9)   | 9202 (4715, 13630)<br>15.8 (8.1, 23.4)  | 2640 (1352, 3956)<br>9.5 (4.9, 14.2) | 10482 (5484, 15531)<br>14.8 (7.7, 21.9) | 4056 (2031, 5923)<br>9.2 (4.6, 13.4) | 11717 (5910, 17408)<br>6.2 (3.1, 9.2)  | 9.2 (4.6, 13.4)                           | <b>8.2 (6.7, 9.8)</b>                                                                                                      |
| <b>SSBs<sup>e</sup> (&gt;0 g/d)</b> | <b>Heart disease</b>                 | <b>Overall by age</b>          | <i>N deaths</i><br>% <i>CHD</i>   | 585 (426, 728)<br>23.2 (16.9, 28.8) |                                   | 2567 (1891, 3306)<br>28.2 (20.8, 36.4) |                                    | 6971 (4877, 9079)<br>22.3 (15.6, 29.1) |                                        | 9988 (7114, 13003)<br>15.8 (11.2, 20.5) |                                      | 7268 (5252, 9540)<br>8.9 (6.4, 11.7)    |                                      | 13079 (102                             |                                           |                                                                                                                            |

**eTable 14. Absolute and proportional cardiometabolic disease mortality associated with suboptimal dietary habits in the US in 2012 by population subgroups (continued)**

| Dietary Factor <sup>a</sup> | Cardiometabolic Disease <sup>b</sup> | Population strata <sup>c</sup> | Associated mortality <sup>d</sup> | Age               |                   |                         |                               |                                               |                        |                   |                   |                   |                    |                   |                                                        | Total (25+ y) (95% UIs)                                          |                                                      |                   |                             |                   |                             |                      |                      |
|-----------------------------|--------------------------------------|--------------------------------|-----------------------------------|-------------------|-------------------|-------------------------|-------------------------------|-----------------------------------------------|------------------------|-------------------|-------------------|-------------------|--------------------|-------------------|--------------------------------------------------------|------------------------------------------------------------------|------------------------------------------------------|-------------------|-----------------------------|-------------------|-----------------------------|----------------------|----------------------|
|                             |                                      |                                |                                   | 25-34 y           |                   | 35-44 y                 |                               | 45-54 y                                       |                        | 55-64 y           |                   | 65-74 y           |                    | 75+ y             |                                                        |                                                                  |                                                      |                   |                             |                   |                             |                      |                      |
|                             |                                      |                                |                                   | Males (95% UIs)   | Females (95% UIs) | Males (95% UIs)         | Females (95% UIs)             | Males (95% UIs)                               | Females (95% UIs)      | Males (95% UIs)   | Females (95% UIs) | Males (95% UIs)   | Females (95% UIs)  | Males (95% UIs)   | Females (95% UIs)                                      |                                                                  |                                                      |                   |                             |                   |                             |                      |                      |
| <b>Race</b>                 | <b>White</b>                         | <b>N deaths</b>                | 309 (206, 413)                    | 85 (52, 134)      | 1145 (779, 1542)  | 400 (260, 556)          | 3945 (2481, 5540)             | 964 (621, 1313)                               | 4994 (3127, 6884)      | 1614 (859, 2433)  | 3298 (2044, 4734) | 1684 (933, 2539)  | 5427 (3655, 7361)  | 4681 (3169, 6396) | 28614 (24782, 32640)                                   |                                                                  |                                                      |                   |                             |                   |                             |                      |                      |
|                             |                                      | <b>% CHD</b>                   | 30.8 (20.5, 41.1)                 | 20.4 (12.5, 32.2) | 29.4 (20, 39.6)   | 25 (16.3, 34.8)         | 25.2 (15.8, 35.3)             | 17.3 (11.1, 23.5)                             | 15.2 (9.5, 20.9)       | 12.8 (6.8, 19.3)  | 8 (5, 11.5)       | 7.8 (4.3, 11.7)   | 4.4 (3, 6)         | 3.2 (2.1, 4.3)    | 7 (6.1, 8)                                             |                                                                  |                                                      |                   |                             |                   |                             |                      |                      |
|                             |                                      | <b>Black</b>                   | <b>N deaths</b>                   | 94 (65, 121)      | 39 (28, 51)       | 409 (293, 516)          | 147 (102, 189)                | 902 (623, 1174)                               | 496 (334, 662)         | 1338 (871, 1774)  | 687 (437, 943)    | 1376 (871, 1921)  | 605 (390, 825)     | 1578 (942, 2194)  | 1398 (942, 1931)                                       | 7663 (6758, 8581)                                                |                                                      |                   |                             |                   |                             |                      |                      |
|                             |                                      |                                | <b>% CHD</b>                      | 21.1 (14.6, 27)   | 17.3 (12.2, 22.4) | 26.7 (19.1, 33.7)       | 19.1 (13.3, 24.6)             | 21.2 (14.6, 27.6)                             | 21.2 (14.3, 28.3)      | 17.9 (11.7, 23.7) | 16.3 (10.4, 22.4) | 13.1 (8.8, 18.3)  | 12.7 (8.2, 17.4)   | 6.9 (4.3, 10)     | 9.4 (6.4, 13)                                          | 13.4 (11.8, 15)                                                  |                                                      |                   |                             |                   |                             |                      |                      |
|                             |                                      |                                | <b>Hispanic</b>                   | <b>N deaths</b>   | 41 (30, 52)       | 9 (6, 12)               | 161 (108, 213)                | 32 (21, 44)                                   | 412 (268, 542)         | 90 (59, 121)      | 498 (322, 688)    | 160 (96, 236)     | 349 (220, 485)     | 174 (88, 263)     | 295 (135, 500)                                         | 280 (174, 405)                                                   | 2514 (2163, 2943)                                    |                   |                             |                   |                             |                      |                      |
|                             |                                      |                                |                                   | <b>% CHD</b>      | 18.8 (13.6, 24)   | 13.8 (9.2, 18.4)        | 24.2 (16.1, 31.9)             | 15.4 (10.3, 20.8)                             | 24.2 (15.8, 31.9)      | 15.5 (10.1, 20.7) | 17.2 (11.2, 23.8) | 13 (7.8, 19.2)    | 11.3 (7.1, 15.9)   | 9.9 (5, 20.6)     | 4.3 (2.7, 4)                                           | 3.3 (2.1, 4.8)                                                   | 9.1 (7.8, 10.6)                                      |                   |                             |                   |                             |                      |                      |
|                             |                                      |                                |                                   | <b>Other</b>      | <b>N deaths</b>   | 18 (11, 23)             | 3 (2, 5)                      | 81 (50, 109)                                  | 9 (6, 14)              | 120 (66, 185)     | 22 (13, 33)       | 313 (176, 477)    | 27 (14, 43)        | 137 (67, 227)     | 103 (34, 212)                                          | 137 (74, 214)                                                    | 131 (46, 303)                                        | 1119 (902, 1826)  |                             |                   |                             |                      |                      |
|                             |                                      |                                |                                   |                   | <b>% CHD</b>      | 16.9 (10.7, 22.5)       | 7.9 (4.5, 11.9)               | 24.3 (15, 32.9)                               | 10.1 (6.1, 15.1)       | 13.8 (7.6, 21.2)  | 9.2 (5.5, 13.4)   | 20.9 (11.7, 31.7) | 4.5 (2.4, 7)       | 8 (3.9, 13.2)     | 10.8 (3.5, 22.1)                                       | 2.9 (1.6, 7.5)                                                   | 3.5 (1.9, 5.4)                                       | 7.5 (6.1, 12.3)   |                             |                   |                             |                      |                      |
|                             |                                      |                                |                                   |                   | <b>Total</b>      | <b>N deaths</b>         | 458 (305, 598)                | 127 (81, 175)                                 | 1917 (1272, 2574)      | 659 (399, 988)    | 5409 (3357, 7383) | 1563 (1010, 2229) | 7627 (4998, 10492) | 2330 (1405, 3432) | 4632 (2998, 6630)                                      | 2558 (1519, 3755)                                                | 6541 (4538, 8657)                                    | 6612 (4453, 8979) | <b>40552 (35643, 45841)</b> |                   |                             |                      |                      |
|                             |                                      |                                |                                   |                   |                   | <b>% CHD</b>            | 25.9 (17.2, 33.7)             | 16.9 (10.8, 23.2)                             | 29.8 (19.8, 40.1)      | 24.7 (15, 37.1)   | 24 (14.9, 32.8)   | 17.9 (11.6, 25.5) | 17 (11.2, 23.5)    | 12.5 (7.5, 18.4)  | 8.8 (5.7, 12.6)                                        | 8.8 (5.2, 12.9)                                                  | 4.6 (3.2, 6.1)                                       | 3.8 (2.5, 5.1)    | <b>8 (7, 9.1)</b>           |                   |                             |                      |                      |
|                             |                                      |                                |                                   |                   |                   | <b>SSBs<sup>f</sup></b> | <b>Coronary heart disease</b> | <b>Overall by age</b>                         | <i>N deaths</i>        | 559 (410, 702)    | 2498 (1824, 3208) | 6821 (4760, 8932) | 9850 (6991, 12864) | 7194 (5177, 9457) | 12932 (10062, 16165)                                   | <b>M: 26386 (21960, 30680)</b><br><b>F: 13703 (11031, 16525)</b> |                                                      |                   |                             |                   |                             |                      |                      |
|                             |                                      |                                |                                   |                   |                   |                         |                               | <i>% CHD</i>                                  | 54.5 (40, 68.5)        | 48.2 (35.2, 61.9) | 31.1 (21.7, 40.8) | 20.6 (14.7, 27)   | 11.5 (8.2, 15.1)   | 5.6 (4.3, 6.9)    | <b>M: 12.8 (10.6, 14.9)</b><br><b>F: 8.3 (6.7, 10)</b> |                                                                  |                                                      |                   |                             |                   |                             |                      |                      |
|                             |                                      |                                |                                   |                   |                   |                         |                               | <b>Education</b>                              | <b>&lt;High-school</b> | <i>N deaths</i>   | 98 (66, 125)      | 32 (21, 42)       | 436 (288, 562)     | 187 (117, 260)    | 1216 (767, 1632)                                       | 470 (297, 647)                                                   | 1661 (977, 2358)                                     | 430 (269, 613)    | 1299 (790, 1930)            | 758 (416, 1193)   | 2156 (1325, 3019)           | 2119 (1331, 3037)    | 10898 (9349, 12492)  |
|                             |                                      |                                |                                   |                   |                   |                         |                               |                                               |                        | <i>% CHD</i>      | 58.1 (39.1, 74.2) | 55.8 (37.2, 73.1) | 59.3 (39.3, 76.5)  | 63.7 (39.9, 88.7) | 38.1 (24, 51.1)                                        | 39.6 (25.1, 54.6)                                                | 27.7 (16.3, 39.4)                                    | 17.7 (11.1, 25.2) | 14.6 (8.9, 21.7)            | 15.8 (8.7, 24.8)  | 7.9 (4.8, 11)               | 6.2 (3.9, 8.8)       | 12.2 (10.4, 14)      |
| <b>High-school</b>          | <i>N deaths</i>                      |                                |                                   |                   |                   |                         |                               |                                               |                        | 346 (241, 427)    | 95 (62, 130)      | 1431 (919, 1873)  | 489 (298, 710)     | 3594 (2378, 4797) | 1164 (763, 1592)                                       | 4728 (2969, 6615)                                                | 1961 (1151, 2910)                                    | 3174 (1831, 4668) | 1438 (846, 2094)            | 3390 (2266, 4855) | 4015 (2638, 5580)           | 25829 (22592, 29746) |                      |
|                             | <i>% CHD</i>                         |                                |                                   |                   |                   |                         |                               |                                               |                        | 67.4 (47, 83.2)   | 55.7 (36.5, 76.7) | 54.3 (34.9, 71.1) | 54 (32.9, 78.4)    | 32.9 (21.8, 43.9) | 31.1 (20.4, 42.6)                                      | 21.4 (13.4, 30)                                                  | 22.4 (13.2, 33.3)                                    | 12.9 (7.5, 19)    | 10.6 (6.2, 15.5)            | 5.9 (3.9, 8.4)    | 5.4 (3.6, 7.5)              | 11.8 (10.3, 13.5)    |                      |
|                             | <b>College</b>                       | <i>N deaths</i>                |                                   |                   |                   |                         |                               |                                               |                        | 25 (17, 35)       | 8 (5, 11)         | 127 (77, 188)     | 30 (18, 43)        | 523 (303, 824)    | 66 (40, 96)                                            | 831 (507, 1255)                                                  | 138 (78, 217)                                        | 464 (267, 720)    | 111 (55, 187)               | 929 (554, 1412)   | 366 (154, 658)              | 3678 (3022, 4497)    |                      |
|                             |                                      | <i>% CHD</i>                   |                                   |                   |                   |                         |                               |                                               |                        | 33.3 (22.1, 46.6) | 23.6 (14.8, 33.9) | 30.3 (18.5, 44.9) | 24.4 (15.1, 35.1)  | 28 (16.3, 44.2)   | 13.5 (8.2, 19.4)                                       | 15.2 (9.3, 23)                                                   | 8.6 (4.8, 13.5)                                      | 6.6 (3.8, 10.2)   | 5 (2.5, 8.4)                | 4.3 (2.5, 6.5)    | 2.9 (1.2, 5)                | 6.9 (5.6, 8.4)       |                      |
|                             |                                      | <b>Race</b>                    | <b>White</b>                      |                   |                   |                         |                               |                                               |                        | <i>N deaths</i>   | 300 (195, 402)    | 84 (50, 133)      | 1116 (736, 1510)   | 389 (250, 550)    | 3889 (2393, 5510)                                      | 947 (599, 1293)                                                  | 4917 (3096, 6832)                                    | 1599 (840, 2416)  | 3274 (2021, 4710)           | 1672 (922, 2527)  | 5367 (3607, 7316)           | 4618 (3100, 6345)    | 28266 (24427, 32247) |
|                             |                                      |                                |                                   |                   |                   |                         |                               |                                               |                        | <i>% CHD</i>      | 64.3 (41.8, 86.3) | 51.9 (30.8, 82.4) | 44.2 (29.1, 59.8)  | 42.3 (27.1, 59.7) | 32.6 (20.1, 46.2)                                      | 25 (15.8, 34.1)                                                  | 18.9 (11.9, 26.2)                                    | 17.7 (10.3, 26.5) | 9.9 (6.1, 14.3)             | 10.6 (5.8, 16)    | 5.7 (3.9, 7.8)              | 4.5 (3, 6.2)         | 9.4 (8.1, 10.7)      |
|                             |                                      |                                |                                   | <b>Black</b>      |                   |                         |                               |                                               |                        | <i>N deaths</i>   | 87 (58, 111)      | 36 (25, 47)       | 387 (276, 488)     | 135 (91, 173)     | 864 (577, 1141)                                        | 469 (311, 632)                                                   | 1291 (833, 1732)                                     | 665 (414, 928)    | 859 (566, 1200)             | 593 (378, 813)    | 651 (398, 955)              | 1366 (907, 1903)     | 7420 (6528, 8353)    |
|                             |                                      |                                |                                   |                   |                   |                         |                               |                                               |                        | <i>% CHD</i>      | 50.2 (33.4, 63.9) | 51.2 (35.8, 66.6) | 51.5 (36.6, 65)    | 47.6 (32.1, 61)   | 37.5 (22.4, 44.3)                                      | 37.6 (24.9, 50.6)                                                | 25.2 (16.3, 33.8)                                    | 24.7 (15.4, 34.4) | 17.8 (11.7, 24.8)           | 18 (11.5, 24.7)   | 9 (5.5, 13.2)               | 12.6 (8.5, 17.8)     | 19.1 (16.8, 21.4)    |
|                             |                                      |                                |                                   |                   | <b>Hispanic</b>   |                         |                               |                                               |                        | <i>N deaths</i>   | 39 (27, 49)       | 9 (6, 12)         | 156 (102, 205)     | 31 (20, 42)       | 402 (260, 535)                                         | 88 (56, 118)                                                     | 489 (316, 674)                                       | 157 (94, 234)     | 345 (217, 491)              | 172 (87, 362)     | 290 (132, 495)              | 276 (170, 400)       | 2471 (2108, 2896)    |
|                             |                                      |                                |                                   |                   |                   |                         |                               |                                               |                        | <i>% CHD</i>      | 49 (34.6, 62.5)   | 44.8 (28.9, 59.6) | 44.7 (29.1, 58.7)  | 33.6 (22, 45.7)   | 33.9 (21.9, 45)                                        | 25.1 (16, 33.8)                                                  | 21.9 (14.1, 30.2)                                    | 18.1 (10.8, 26.9) | 13.9 (8.8, 19.8)            | 13.3 (6.7, 27.9)  | 5.4 (2.4, 9.1)              | 4.3 (2.7, 6.3)       | 11.9 (10.2, 14)      |
|                             |                                      |                                |                                   |                   |                   | <b>Other</b>            | <i>N deaths</i>               |                                               |                        | 17 (11, 23)       | 3 (2, 5)          | 79 (49, 108)      | 9 (5, 14)          | 118 (65, 183)     | 22 (13, 32)                                            | 309 (171, 474)                                                   | 27 (14, 43)                                          | 135 (65, 252)     | 102 (33, 202)               | 135 (73, 212)     | 129 (43, 302)               | 1101 (887, 1809)     |                      |
|                             |                                      |                                |                                   |                   |                   |                         | <i>% CHD</i>                  |                                               |                        | 38.4 (24.1, 51.3) | 31.4 (17.6, 46.8) | 37.3 (23.1, 51.1) | 20.1 (11.9, 30)    | 17.7 (9.7, 27.2)  | 14.3 (8.5, 21)                                         | 25.9 (14.3, 39.8)                                                | 6.5 (3.4, 10.2)                                      | 9.8 (4.7, 16.3)   | 14.7 (4.7, 29)              | 4.4 (2.3, 6.8)    | 9.8 (7.9, 16.1)             |                      |                      |
|                             |                                      |                                |                                   |                   |                   |                         | <b>Total</b>                  | <i>N deaths</i>                               | 300 (195, 402)         | 84 (50, 133)      | 1116 (736, 1510)  | 389 (250, 550)    | 3889 (2393, 5510)  | 947 (599, 1293)   | 4917 (3096, 6832)                                      | 1599 (840, 2416)                                                 | 3274 (2021, 4710)                                    | 1672 (922, 2527)  | 5367 (3607, 7316)           | 4618 (3100, 6345) | <b>39937 (34992, 45204)</b> |                      |                      |
|                             |                                      |                                |                                   |                   |                   |                         |                               | <i>% CHD</i>                                  | 64.3 (41.8, 86.3)      | 51.9 (30.8, 82.4) | 44.2 (29.1, 59.8) | 42.3 (27.1, 59.7) | 32.6 (20.1, 46.2)  | 25 (15.8, 34.1)   | 18.9 (11.9, 26.2)                                      | 17.5 (9.2, 26.5)                                                 | 9.9 (6.1, 14.3)                                      | 10.6 (5.8, 16)    | 5.7 (3.9, 7.8)              | 4.5 (3, 6.2)      | <b>10.8 (9.4, 12.2)</b>     |                      |                      |
| <b>SSBs<sup>f</sup></b>     |                                      |                                |                                   |                   |                   |                         |                               | <b>Hypertensive heart disease<sup>e</sup></b> | <b>Overall by age</b>  | <i>N deaths</i>   | 22 (2, 52)        | 74 (12, 159)      | 137 (31, 259)      | 147 (57, 269)     | 72 (47, 106)                                           | 157 (87, 249)                                                    | <b>M: 391 (212, 594)</b><br><b>F: 221 (139, 319)</b> |                   |                             |                   |                             |                      |                      |
|                             |                                      |                                |                                   |                   |                   |                         |                               |                                               | <i>% HHD</i>           | 5.8 (0.5, 13.7)   | 4.9 (0.8, 10.6)   | 3.4 (0.8, 6.4)    | 2.4 (0.9, 4.3)     | 1.5 (1, 2.2)      | 0.9 (0.5, 1.4)                                         | <b>M: 2.2 (1.4, 3.4)</b><br><b>F: 1.3 (0.8, 1.8)</b>             |                                                      |                   |                             |                   |                             |                      |                      |
|                             | <b>Education</b>                     |                                |                                   |                   |                   |                         |                               |                                               | <b>&lt;High-school</b> | <i>N deaths</i>   | 4 (0, 12)         | 1 (0, 3)          | 12 (0, 32)         | 5 (0, 13)         | 22 (0, 50)                                             | 8 (0, 18)                                                        | 22 (5, 45)                                           | 7 (1, 15)         | 11 (5, 19)                  | 7 (3, 12)         | 22 (10, 42)                 | 32 (12, 60)          | 157 (114, 214)       |
|                             |                                      |                                |                                   |                   |                   |                         |                               |                                               |                        | <i>% HHD</i>      | 7 (0, 19.1)       | 6.3 (0, 16.5)     | 6.4 (0, 16.4)      | 6.3 (0, 16.5)     | 4.3 (0, 9.6)                                           | 4 (0, 8.8)                                                       | 3.5 (0.7, 7.2)                                       | 2.1 (0.4, 4.4)    | 1.9 (0.9, 3.3)              | 1.9 (0.9, 3.3)    | 1.3 (0.6, 2.6)              | 0.9 (0.4, 1.8)       | 2 (1.4, 2.7)         |
|                             |                                      | <b>High-school</b>             | <i>N deaths</i>                   |                   |                   |                         |                               |                                               |                        | 15 (0, 42)        | 3 (0, 9)          | 39 (0, 104)       | 15 (0, 40)         | 66 (0, 147)       | 28 (0, 66)                                             | 73 (15, 147)                                                     | 30 (7, 65)                                           | 29 (15, 50)       | 15 (8, 25)                  | 32 (12, 59)       | 60 (23, 113)                | 423 (295, 554)       |                      |
|                             |                                      |                                | <i>% HHD</i>                      |                   |                   |                         |                               |                                               |                        | 8.4 (0, 22.8)     | 5.3 (0, 14.9)     | 5.6 (0, 14.8)     | 4.8 (0, 12.8)      | 3.6 (0, 8.1)      | 3.2 (0, 7.5)                                           | 2.6 (0.6, 5.3)                                                   | 2.3 (0.5, 5.1)                                       | 1.7 (0.9, 3)      | 1.2 (0.7, 2)                | 1 (0.4, 1.9)      | 0.9 (0.3, 1.6)              | 2 (1.4, 2.6)         |                      |
|                             |                                      |                                | <b>College</b>                    | <i>N deaths</i>   |                   |                         |                               |                                               |                        | 1 (0, 3)          | 0 (0, 1)          | 4 (0, 10)         | 1 (0, 3)           | 8 (0, 21)         | 2 (0, 6)                                               | 13 (3, 29)                                                       | 3 (1, 7)                                             | 5 (2, 9)          | 1 (1, 3)                    | 9 (3, 17)         | 5 (1, 12)                   | 54 (38, 76)          |                      |
|                             |                                      |                                |                                   | <i>% HHD</i>      |                   |                         |                               |                                               |                        | 3.4 (0, 9.4)      | 2.2 (0, 6.6)      | 2.8 (0, 7.7)      | 2 (0, 5.4)         | 2.5 (0, 6.6)      | 1.5 (0, 3.7)                                           | 1.9 (0.4, 4.2)                                                   | 0.8 (0.2, 1.9)                                       | 0.9 (0.5, 1.6)    | 0.6 (0.2, 1.1)              | 0.7 (0.3, 1.4)    | 0.4 (0.1, 0.9)              | 1.1 (0.8, 1.5)       |                      |
|                             |                                      |                                |                                   | <b>Race</b>       | <b>White</b>      |                         |                               |                                               |                        | <i>N deaths</i>   | 9 (0, 24)         | 2 (0, 5)          | 26 (0, 67)         | 9 (0, 24)         | 49 (0, 115)                                            | 18 (0, 42)                                                       | 59 (15, 126)                                         | 17 (4, 36)        | 24 (12, 40)                 | 12 (6, 21)        | 50 (19, 91)                 | 59 (25, 111)         | 344 (246, 462)       |
|                             |                                      |                                |                                   |                   |                   |                         |                               |                                               |                        | <i>% HHD</i>      | 6.6 (0, 17.2)     | 4.4 (0, 12.5)     | 5.1 (0, 12.9)      | 4.5 (0, 12.4)     | 3.1 (0, 7.3)                                           | 2.8 (0, 6.7)                                                     | 2.2 (0.6, 4.8)                                       | 1.5 (0.3, 3.3)    | 1.3 (0.7, 2.1)              | 1 (0.5, 1.8)      | 1.1 (0.4, 1.9)              | 0.6 (0.3, 1.2)       | 1.4 (1, 1.9)         |
|                             |                                      |                                |                                   |                   |                   | <b>Black</b>            |                               |                                               |                        | <i>N deaths</i>   | 6 (0, 17)         | 3 (0, 8)          | 22 (0, 51)         | 11 (0, 27)        | 33 (0, 79)                                             | 25 (0, 58)                                                       | 40 (11, 80)                                          | 20 (3, 39)        | 17 (9, 29)                  | 12 (7, 20)        | 15 (5, 30)                  | 32 (13, 59)          | 244 (176, 327)       |
|                             |                                      |                                |                                   |                   |                   |                         |                               |                                               |                        | <i>% HHD</i>      | 6.6 (0, 18)       | 6.4 (0, 18)       | 6.2 (0, 14.3)      | 5.3 (0, 12.6)     | 3.7 (0, 8.9)                                           | 4.6 (0, 10.4)                                                    | 3.2 (0.9, 6.5)                                       | 2.9 (0.5, 5.8)    | 2.2 (1.2, 3.8)              | 1.7 (0.6, 3.4)    | 2 (0.8, 3.6)                | 3.1 (2.2, 4.1)       | 45 (30, 62)          |
|                             |                                      |                                |                                   |                   |                   |                         | <b>Hispanic</b>               |                                               |                        | <i>N deaths</i>   | 2 (0, 6)          | 0 (0, 1)          | 5 (0, 14)          | 1 (0, 3)          | 8 (0, 19)                                              | 3 (0, 6)                                                         | 8 (2, 16)                                            | 2 (0, 5)          | 4 (2, 7)                    | 2 (1, 3)          | 4 (1, 8)                    | 4 (1, 8)             | 45 (30, 62)          |
|                             |                                      |                                |                                   |                   |                   |                         |                               |                                               |                        | <i>% HHD</i>      | 6.1 (0, 15.9)     | 5.2 (0, 14)       | 4.4 (0, 11.5)      | 3.5 (0, 8.7)      | 3.8 (0.1, 8.9)                                         | 3.1 (0, 7)                                                       | 2.8 (0.8, 5.7)                                       | 1.7 (0.3, 3.5)    | 2 (1.1, 3.3)                | 1 (0.5, 1.7)      | 0.9 (0.3, 2.1)              | 0.6 (0.2, 1.3)       | 1.6 (1.3, 2.8)       |
| <b>Other</b>                |                                      |                                |                                   |                   |                   |                         |                               | <i>N deaths</i>                               |                        | 9 (0, 24)         | 2 (0, 5)          | 26 (0, 67)        | 9 (0, 24)          | 49 (0, 115)       | 18 (0, 42)                                             | 59 (15, 126)                                                     | 17 (4, 36)                                           | 24 (12, 40)       | 12 (6, 21)                  | 50 (19, 91)       | 59 (25, 111)                | 216 (154, 278)       |                      |
|                             |                                      |                                |                                   |                   |                   |                         |                               | <i>% HHD</i>                                  |                        | 6.6 (0, 17.2)     | 4.4 (0, 12.5)     | 5.1 (0, 12.9)     | 4.5 (0, 12.4)      | 3.1 (0, 7.3)      | 2.8 (0, 6.7)                                           | 2.2 (0.6, 4.8)                                                   | 1.5 (0.3, 3.3)                                       | 1.3 (0.7, 2.1)    | 1 (0.5, 1.8)                | 1.1 (0.4, 1.9)    | 0.6 (0.3, 1.2)              | 1.5 (0.9, 2.2)       |                      |
|                             | <b>Total</b>                         |                                |                                   |                   |                   |                         |                               | <i>N deaths</i>                               | 6 (0, 17)              | 3 (0, 8)          | 22 (0, 51)        | 11 (0, 27)        | 33 (0, 79)         | 25 (0, 58)        | 40 (11, 80)                                            | 20 (3, 39)                                                       | 17 (9, 29)                                           | 12 (7, 20)        | 15 (5, 30)                  | 32 (13, 59)       | <b>616 (433, 830)</b>       |                      |                      |
|                             |                                      |                                |                                   |                   |                   |                         |                               | <i>% HHD</i>                                  | 6.6 (0, 18)            | 6.4 (0, 18)       | 6.2 (0, 14.3)     | 5.3 (0, 12.6)     | 3.7 (0, 8.9)       | 4.6 (0, 10.4)     | 3.2 (0.9, 6.5)                                         | 2.9 (0.5, 5.8)                                                   | 2.2 (1.2, 3.8)                                       | 1.7 (0.6, 3.4)    | 2 (0.8, 3.6)                | 3.1 (2.2, 4.1)    | <b>1.8 (1.2, 2.4)</b>       |                      |                      |
|                             |                                      | <b>SSBs<sup>f</sup></b>        |                                   |                   |                   |                         |                               | <b>Stroke, total</b>                          | <b>Overall by age</b>  | <i>N deaths</i>   | 36 (28, 46)       | 94 (72, 121)      | 189 (146, 238)     | 216 (166, 274)    | 169 (131, 215)                                         | 206 (144, 277)                                                   | <b>M: 514 (430, 594)</b><br><b>F: 404 (328, 486)</b> |                   |                             |                   |                             |                      |                      |
|                             |                                      |                                |                                   |                   |                   |                         |                               |                                               | <i>% TSTK</i>          | 6.8 (5.3, 8.7)    | 5.4 (4            |                   |                    |                   |                                                        |                                                                  |                                                      |                   |                             |                   |                             |                      |                      |

**eTable 14. Absolute and proportional cardiometabolic disease mortality associated with suboptimal dietary habits in the US in 2012 by population subgroups (continued)**

| Dietary Factor <sup>a</sup> | Cardiometabolic Disease <sup>b</sup> | Population strata <sup>c</sup> | Associated mortality <sup>d</sup> | Age              |                 |                 |                 |                |                |                |                |                |                |                |                | Total (25+ y) (95% UIs)                              |
|-----------------------------|--------------------------------------|--------------------------------|-----------------------------------|------------------|-----------------|-----------------|-----------------|----------------|----------------|----------------|----------------|----------------|----------------|----------------|----------------|------------------------------------------------------|
|                             |                                      |                                |                                   | 25-34 y          |                 | 35-44 y         |                 | 45-54 y        |                | 55-64 y        |                | 65-74 y        |                | 75+ y          |                |                                                      |
|                             |                                      |                                |                                   | Males            | Females         | Males           | Females         | Males          | Females        | Males          | Females        | Males          | Females        | Males          | Females        |                                                      |
|                             |                                      |                                |                                   | (95% UIs)        | (95% UIs)       | (95% UIs)       | (95% UIs)       | (95% UIs)      | (95% UIs)      | (95% UIs)      | (95% UIs)      | (95% UIs)      | (95% UIs)      | (95% UIs)      | (95% UIs)      |                                                      |
|                             |                                      | Hispanic                       | <i>N TSTK deaths</i>              | 8.1 (5.8, 11.2)  | 8 (5.5, 11)     | 7.1 (4.9, 9.6)  | 6.2 (4.3, 8.6)  | 4 (2.8, 5.4)   | 4.9 (3.3, 7)   | 2.7 (1.9, 3.8) | 2.5 (1.8, 3.5) | 1.4 (1, 2)     | 1.4 (1, 1.9)   | 0.4 (0.3, 0.8) | 0.5 (0.3, 0.8) | 1.7 (1.5, 1.9)                                       |
|                             |                                      | Other                          | <i>N deaths</i>                   | 5 (3, 7)         | 3 (2, 4)        | 10 (7, 14)      | 4 (3, 6)        | 16 (11, 23)    | 8 (6, 11)      | 14 (9, 20)     | 6 (4, 8)       | 4 (3, 5)       | 4 (2, 8)       | 5 (3, 7)       | 4 (2, 8)       | 87 (76, 99)                                          |
|                             |                                      |                                | <i>% TSTK</i>                     | 8.2 (5.3, 11.9)  | 7 (4.6, 9.9)    | 5.2 (3.6, 7.4)  | 4.3 (2.8, 6.1)  | 4.1 (2.8, 5.7) | 3.2 (2.2, 4.5) | 2.4 (1.6, 3.4) | 1.5 (1, 2.1)   | 1.3 (0.9, 1.8) | 0.6 (0.4, 0.9) | 0.2 (0.1, 0.4) | 0.2 (0.1, 0.3) | 1.1 (1, 1.3)                                         |
|                             |                                      |                                | <i>N deaths</i>                   | 1 (1, 2)         | 0 (0, 0)        | 3 (2, 4)        | 1 (1, 2)        | 4 (2, 6)       | 2 (1, 3)       | 9 (6, 14)      | 2 (1, 3)       | 4 (2, 7)       | 5 (2, 9)       | 2 (1, 4)       | 3 (1, 6)       | 36 (30, 48)                                          |
|                             |                                      |                                | <i>% TSTK</i>                     | 5.8 (3.5, 9)     | 0.5 (0.3, 0.8)  | 4.2 (2.8, 6.4)  | 2.5 (1.5, 4)    | 1.9 (1.2, 2.9) | 1.6 (1, 2.5)   | 2.9 (1.8, 4.4) | 0.6 (0.4, 1)   | 0.9 (0.4, 1.5) | 1.1 (0.5, 2.2) | 0.2 (0.1, 0.3) | 0.2 (0.1, 0.3) | 0.7 (0.6, 1)                                         |
|                             |                                      | <b>Total</b>                   | <i>N deaths</i>                   | 13 (9, 17)       | 7 (5, 11)       | 26 (18, 37)     | 22 (15, 31)     | 54 (37, 72)    | 41 (27, 58)    | 74 (51, 102)   | 38 (25, 54)    | 56 (39, 77)    | 39 (27, 58)    | 71 (41, 115)   | 79 (47, 121)   | <b>916 (809, 1028)</b>                               |
|                             |                                      |                                | <i>% TSTK</i>                     | 8.3 (5.8, 11.7)  | 5.7 (4, 8.4)    | 5.8 (4.1, 8.1)  | 5.3 (3.7, 7.7)  | 3.3 (2.3, 4.5) | 2.9 (2, 4.2)   | 1.9 (1.3, 2.6) | 1.3 (0.9, 1.9) | 0.8 (0.6, 1.1) | 0.6 (0.4, 0.9) | 0.3 (0.2, 0.4) | 0.2 (0.1, 0.2) | <b>0.7 (0.6, 0.8)</b>                                |
| SSBs <sup>f</sup>           | Ischemic Stroke                      | <b>Overall by age</b>          | <i>N deaths</i>                   |                  | 3 (2, 4)        |                 | 7 (5, 9)        |                | 14 (11, 19)    |                | 18 (12, 24)    |                | 15 (11, 21)    |                | 24 (14, 37)    | <b>M: 45 (36, 56)</b><br><b>F: 37 (27, 48)</b>       |
| (>0 g/d)                    |                                      |                                | <i>% ISTK</i>                     |                  | 4.6 (3.4, 6.2)  |                 | 3.8 (2.7, 5.1)  |                | 2.4 (1.8, 3.2) |                | 1.5 (1, 2)     |                | 0.7 (0.5, 1)   |                | 0.2 (0.1, 0.3) | <b>M: 0.7 (0.6, 0.9)</b><br><b>F: 0.4 (0.3, 0.5)</b> |
|                             |                                      | <b>Education</b>               |                                   |                  |                 |                 |                 |                |                |                |                |                |                |                |                |                                                      |
|                             |                                      | <High-school                   | <i>N deaths</i>                   | 0 (0, 0)         | 0 (0, 0)        | 1 (1, 2)        | 0 (0, 1)        | 2 (1, 3)       | 1 (1, 2)       | 3 (2, 6)       | 1 (1, 2)       | 3 (1, 4)       | 2 (1, 4)       | 4 (2, 6)       | 5 (2, 8)       | 24 (20, 29)                                          |
|                             |                                      |                                | <i>% ISTK</i>                     | 6.4 (3.8, 9.2)   | 5.6 (3.5, 8.2)  | 5.6 (3.3, 8.2)  | 5.2 (3.1, 7.9)  | 3.1 (1.9, 4.6) | 3 (1.8, 4.4)   | 2.2 (1.2, 3.5) | 1.4 (0.7, 2.1) | 1 (0.5, 1.5)   | 1 (0.5, 1.6)   | 0.3 (0.1, 0.6) | 0.2 (0.1, 0.4) | 0.6 (0.5, 0.7)                                       |
|                             |                                      | High-school                    | <i>N deaths</i>                   | 2 (1, 3)         | 1 (1, 1)        | 3 (2, 5)        | 2 (1, 3)        | 6 (4, 9)       | 4 (2, 5)       | 8 (4, 11)      | 4 (2, 7)       | 5 (3, 8)       | 4 (2, 5)       | 5 (2, 8)       | 9 (5, 17)      | 53 (45, 63)                                          |
|                             |                                      |                                | <i>% ISTK</i>                     | 7.6 (4.8, 11.1)  | 5 (3.1, 7.2)    | 4.8 (3, 7)      | 4.1 (2.5, 6.2)  | 2.7 (1.7, 3.8) | 2.4 (1.5, 3.4) | 1.7 (1, 2.6)   | 1.5 (0.8, 2.5) | 0.9 (0.5, 1.4) | 0.6 (0.4, 0.9) | 0.2 (0.1, 0.4) | 0.2 (0.1, 0.4) | 0.6 (0.5, 0.7)                                       |
|                             |                                      | College                        | <i>N deaths</i>                   | 0 (0, 0)         | 0 (0, 0)        | 0 (0, 0)        | 0 (0, 1)        | 1 (0, 1)       | 0 (0, 0)       | 1 (1, 2)       | 0 (0, 1)       | 1 (1, 1)       | 0 (0, 0)       | 1 (1, 3)       | 1 (0, 2)       | 7 (6, 9)                                             |
|                             |                                      |                                | <i>% ISTK</i>                     | 3.1 (1.9, 4.8)   | 2.1 (1.2, 3.2)  | 2.3 (1.3, 3.6)  | 1.7 (1, 2.7)    | 1.1 (0.9, 3)   | 0 (0, 0.1)     | 1.2 (0.6, 1.7) | 0.6 (0.3, 0.9) | 0.5 (0.3, 0.8) | 0.3 (0.1, 0.5) | 0.2 (0.1, 0.3) | 0.1 (0, 0.2)   | 0.3 (0.2, 0.4)                                       |
|                             |                                      | <b>Race</b>                    |                                   |                  |                 |                 |                 |                |                |                |                |                |                |                |                |                                                      |
|                             |                                      | White                          | <i>N deaths</i>                   | 1 (1, 2)         | 1 (0, 1)        | 2 (1, 3)        | 2 (1, 3)        | 5 (3, 7)       | 3 (2, 5)       | 7 (4, 11)      | 3 (2, 5)       | 5 (3, 8)       | 4 (2, 6)       | 8 (4, 14)      | 10 (5, 16)     | 51 (42, 61)                                          |
|                             |                                      |                                | <i>% ISTK</i>                     | 5.8 (3.6, 8.4)   | 4 (2.4, 6.2)    | 4.1 (2.5, 6.1)  | 3.8 (2.3, 5.8)  | 2.4 (1.6, 3.5) | 2.1 (1.3, 3.1) | 1.5 (0.9, 2.1) | 1 (0.6, 1.6)   | 0.6 (0.4, 1)   | 0.5 (0.3, 0.8) | 0.2 (0.1, 0.4) | 0.1 (0.1, 0.2) | 0.4 (0.3, 0.5)                                       |
|                             |                                      | Black                          | <i>N deaths</i>                   | 0 (0, 1)         | 1 (0, 1)        | 1 (0, 1)        | 1 (0, 1)        | 3 (2, 5)       | 3 (2, 5)       | 3 (2, 5)       | 2 (1, 3)       | 3 (2, 5)       | 2 (1, 3)       | 2 (1, 3)       | 4 (2, 6)       | 23 (19, 27)                                          |
|                             |                                      |                                | <i>% ISTK</i>                     | 5.7 (3.6, 8.4)   | 5.7 (3.5, 8.4)  | 4.9 (3.1, 7.2)  | 4.3 (2.7, 6.6)  | 2.9 (1.8, 4.3) | 3.4 (2, 5.2)   | 2.1 (1.2, 3.1) | 1.9 (1.2, 2.8) | 1.2 (0.7, 1.7) | 1.1 (0.7, 1.7) | 0.4 (0.2, 0.8) | 0.5 (0.2, 0.8) | 1.1 (1, 1.3)                                         |
|                             |                                      | Hispanic                       | <i>N deaths</i>                   | 0 (0, 1)         | 0 (0, 0)        | 1 (0, 1)        | 0 (0, 0)        | 1 (1, 1)       | 0 (0, 0)       | 1 (1, 2)       | 0 (0, 1)       | 1 (0, 1)       | 0 (0, 1)       | 0 (0, 1)       | 1 (0, 1)       | 6 (5, 7)                                             |
|                             |                                      |                                | <i>% ISTK</i>                     | 5.8 (3.5, 8.4)   | 4.7 (2.9, 6.9)  | 3.6 (2.3, 5.2)  | 2.9 (1.8, 4.4)  | 2.9 (1.8, 4.2) | 2.2 (1.4, 3.3) | 1.8 (1.1, 2.8) | 1.1 (0.6, 1.7) | 1 (0.6, 1.6)   | 0.5 (0.3, 0.8) | 0.2 (0.1, 0.4) | 0.2 (0.1, 0.3) | 0.7 (0.6, 0.8)                                       |
|                             |                                      | Other                          | <i>N deaths</i>                   | 0 (0, 0)         | 0 (0, 0)        | 0 (0, 0)        | 0 (0, 0)        | 0 (0, 0)       | 0 (0, 0)       | 1 (0, 1)       | 0 (0, 0)       | 0 (0, 0)       | 0 (0, 1)       | 0 (0, 0)       | 0 (0, 1)       | 2 (2, 3)                                             |
|                             |                                      |                                | <i>% ISTK</i>                     | 0 (0, 0)         | 2.8 (1.4, 4.8)  | 3 (1.8, 4.7)    | 1.7 (0.9, 2.9)  | 1.3 (0.7, 2.3) | 1.1 (0.6, 1.8) | 2.2 (1.1, 3.6) | 0.4 (0.2, 0.8) | 0.7 (0.3, 1.3) | 0.9 (0.2, 1.9) | 0.2 (0.1, 0.3) | 0.1 (0, 0.3)   | 0.5 (0.4, 0.7)                                       |
|                             |                                      | <b>Total</b>                   | <i>N deaths</i>                   | 1 (1, 2)         | 1 (0, 1)        | 2 (1, 3)        | 2 (1, 3)        | 5 (3, 7)       | 3 (2, 5)       | 7 (4, 11)      | 3 (2, 5)       | 5 (3, 8)       | 4 (2, 6)       | 8 (4, 14)      | 10 (5, 16)     | <b>82 (69, 98)</b>                                   |
|                             |                                      |                                | <i>% ISTK</i>                     | 5.8 (3.6, 8.4)   | 4 (2.4, 6.2)    | 4.1 (2.5, 6.1)  | 3.8 (2.3, 5.8)  | 2.4 (1.6, 3.5) | 2.1 (1.3, 3.1) | 1.5 (0.9, 2.1) | 1 (0.6, 1.6)   | 0.6 (0.4, 1)   | 0.5 (0.3, 0.8) | 0.2 (0.1, 0.4) | 0.1 (0.1, 0.2) | <b>0.5 (0.4, 0.6)</b>                                |
| SSBs <sup>f</sup>           | Hemorrhagic Stroke                   | <b>Overall by age</b>          | <i>N deaths</i>                   |                  | 27 (19, 37)     |                 | 65 (45, 92)     |                | 116 (76, 157)  |                | 96 (64, 137)   |                | 57 (37, 84)    |                | 42 (18, 68)    | <b>M: 235 (187, 292)</b><br><b>F: 170 (132, 215)</b> |
| (>0 g/d)                    |                                      |                                | <i>% HSTK</i>                     |                  | 7.2 (5, 9.8)    |                 | 5.7 (3.9, 8)    |                | 3.5 (2.3, 4.8) |                | 2 (1.3, 2.9)   |                | 1 (0.6, 1.5)   |                | 0.2 (0.1, 0.4) | <b>M: 1.6 (1.3, 2)</b><br><b>F: 1 (0.7, 1.2)</b>     |
|                             |                                      | <b>Education</b>               |                                   |                  |                 |                 |                 |                |                |                |                |                |                |                |                |                                                      |
|                             |                                      | <High-school                   | <i>N deaths</i>                   | 4 (3, 7)         | 3 (2, 4)        | 13 (8, 20)      | 8 (5, 13)       | 19 (10, 31)    | 11 (7, 19)     | 15 (8, 26)     | 6 (3, 10)      | 7 (3, 12)      | 7 (3, 12)      | 5 (1, 11)      | 6 (2, 13)      | 108 (90, 129)                                        |
|                             |                                      |                                | <i>% HSTK</i>                     | 9.4 (5.4, 14.5)  | 8.3 (5.1, 12.9) | 8.2 (5, 12.6)   | 7.8 (4.3, 12.1) | 4.5 (2.5, 7.4) | 4.2 (2.5, 6.9) | 3 (1.5, 5.3)   | 1.9 (1, 3)     | 1.3 (0.6, 2.1) | 1.3 (0.6, 2.3) | 0.4 (0.1, 0.8) | 0.3 (0.1, 0.5) | 1.6 (1.3, 1.9)                                       |
|                             |                                      | High-school                    | <i>N deaths</i>                   | 17 (10, 25)      | 8 (4, 12)       | 27 (16, 41)     | 20 (11, 31)     | 41 (22, 64)    | 38 (21, 59)    | 39 (21, 61)    | 30 (15, 51)    | 19 (10, 31)    | 14 (8, 23)     | 10 (3, 20)     | 15 (3, 31)     | 281 (233, 332)                                       |
|                             |                                      |                                | <i>% HSTK</i>                     | 11.4 (6.8, 17)   | 7.5 (4.3, 11.5) | 7.1 (4.2, 10.7) | 6.1 (3.5, 9.6)  | 3.8 (2.1, 6)   | 3.5 (1.9, 5.5) | 2.4 (1.3, 3.8) | 2.1 (1, 3.6)   | 1.1 (0.6, 1.9) | 0.8 (0.4, 1.3) | 0.2 (0.1, 0.5) | 0.2 (0.1, 0.5) | 1.4 (1.2, 1.7)                                       |
|                             |                                      | College                        | <i>N deaths</i>                   | 1 (1, 2)         | 1 (0, 1)        | 3 (2, 5)        | 2 (1, 3)        | 5 (3, 9)       | 3 (2, 5)       | 7 (3, 12)      | 3 (1, 5)       | 4 (2, 7)       | 2 (1, 3)       | 3 (1, 7)       | 2 (0, 4)       | 36 (29, 44)                                          |
|                             |                                      |                                | <i>% HSTK</i>                     | 4.7 (2.7, 7.5)   | 3.1 (1.7, 5)    | 3.5 (1.9, 5.7)  | 2.6 (1.5, 4)    | 2.7 (1.3, 4.8) | 1.6 (0.9, 2.6) | 1.7 (0.9, 2.8) | 0.7 (0.3, 1.4) | 0.6 (0.3, 1.1) | 0.4 (0.1, 0.7) | 0.2 (0.1, 0.4) | 0.1 (0, 0.3)   | 0.7 (0.5, 0.8)                                       |
|                             |                                      | <b>Race</b>                    |                                   |                  |                 |                 |                 |                |                |                |                |                |                |                |                |                                                      |
|                             |                                      | White                          | <i>N deaths</i>                   | 10 (6, 14)       | 5 (3, 8)        | 18 (10, 27)     | 15 (8, 24)      | 30 (17, 47)    | 26 (14, 41)    | 31 (16, 49)    | 18 (9, 30)     | 18 (10, 30)    | 14 (7, 25)     | 16 (4, 34)     | 14 (4, 29)     | 220 (179, 259)                                       |
|                             |                                      |                                | <i>% HSTK</i>                     | 8.7 (5.1, 13.1)  | 6.1 (3.5, 9.9)  | 6.1 (3.4, 9.5)  | 5.6 (3.2, 9.2)  | 3.5 (2, 5.4)   | 3.1 (1.7, 4.9) | 2 (1, 3.1)     | 1.4 (0.7, 2.3) | 1.3 (0.5, 1.4) | 0.7 (0.3, 1.2) | 0.4 (0.1, 0.6) | 0.3 (0.1, 0.3) | 0.9 (0.7, 1.1)                                       |
|                             |                                      | Black                          | <i>N deaths</i>                   | 4 (2, 6)         | 3 (2, 4)        | 12 (7, 18)      | 9 (5, 13)       | 20 (12, 32)    | 24 (13, 37)    | 17 (9, 26)     | 13 (7, 21)     | 5 (3, 9)       | 6 (3, 10)      | 2 (0, 5)       | 5 (1, 9)       | 120 (99, 143)                                        |
|                             |                                      |                                | <i>% HSTK</i>                     | 8.6 (5.1, 13)    | 8.5 (4.7, 12.9) | 7.2 (4.2, 10.9) | 6.4 (3.6, 9.9)  | 4.2 (2.4, 6.5) | 5.1 (2.7, 8)   | 2.9 (1.6, 4.5) | 2.6 (1.4, 4.3) | 1.5 (0.8, 2.5) | 1.5 (0.8, 2.5) | 0.5 (0.1, 1.1) | 0.6 (0.1, 1.1) | 2.7 (2.3, 3.3)                                       |
|                             |                                      | Hispanic                       | <i>N deaths</i>                   | 4 (2, 6)         | 2 (1, 3)        | 7 (4, 12)       | 3 (2, 5)        | 11 (6, 17)     | 6 (3, 9)       | 7 (4, 12)      | 3 (1, 5)       | 3 (1, 5)       | 2 (1, 3)       | 1 (0, 2)       | 1 (0, 2)       | 51 (42, 60)                                          |
|                             |                                      |                                | <i>% HSTK</i>                     | 8.5 (4.9, 13.1)  | 7.2 (4, 11.1)   | 5.4 (3.2, 8.3)  | 4.3 (2.5, 6.7)  | 4.2 (2.4, 6.5) | 3.3 (1.9, 5)   | 2.5 (1.3, 4.1) | 1.5 (0.8, 2.6) | 1.3 (0.7, 2.3) | 0.6 (0.3, 1.1) | 0.2 (0, 0.6)   | 0.2 (0, 0.4)   | 2 (1.6, 2.3)                                         |
|                             |                                      | Other                          | <i>N deaths</i>                   | 1 (1, 2)         | 0 (0, 0)        | 2 (1, 3)        | 1 (1, 2)        | 2 (1, 4)       | 2 (1, 3)       | 5 (2, 8)       | 1 (0, 2)       | 2 (0, 3)       | 2 (1, 4)       | 1 (0, 1)       | 1 (0, 2)       | 19 (15, 24)                                          |
|                             |                                      |                                | <i>% HSTK</i>                     | 5.8 (3.3, 9.2)   | 0 (0, 0)        | 4.4 (2.5, 7)    | 2.6 (1.3, 4.5)  | 1.9 (1, 3.4)   | 1.6 (0.9, 2.9) | 2.9 (1.4, 5.2) | 0.6 (0.3, 1.2) | 0.9 (0.3, 1.9) | 1.1 (0.3, 2.5) | 0.2 (0, 0.4)   | 0.1 (0, 0.5)   | 1.1 (0.8, 1.4)                                       |
|                             |                                      | <b>Total</b>                   | <i>N deaths</i>                   | 10 (6, 14)       | 5 (3, 8)        | 18 (10, 27)     | 15 (8, 24)      | 30 (17, 47)    | 26 (14, 41)    | 31 (16, 49)    | 18 (9, 30)     | 18 (10, 30)    | 14 (7, 25)     | 14 (4, 34)     | 405 (342, 479) |                                                      |
|                             |                                      |                                | <i>% HSTK</i>                     | 8.7 (5.1, 13.1)  | 6.1 (3.5, 9.9)  | 6.1 (3.4, 9.5)  | 5.6 (3.2, 9.2)  | 3.5 (2, 5.4)   | 3.1 (1.7, 4.9) | 2 (1, 3.1)     | 1.4 (0.7, 2.3) | 0.8 (0.5, 1.4) | 0.7 (0.3, 1.2) | 0.3 (0.1, 0.6) | 0.2 (0, 0.3)   | <b>1.2 (1.1, 1.5)</b>                                |
| SSBs <sup>f</sup>           | Other Stroke                         | <b>Overall by age</b>          | <i>N deaths</i>                   |                  | 6 (4, 8)        |                 | 22 (16, 31)     |                | 59 (41, 82)    |                | 100 (67, 144)  |                | 96 (64, 133)   |                | 138 (83, 206)  | <b>M: 228 (176, 294)</b><br><b>F: 194 (138, 266)</b> |
| (>0 g/d)                    |                                      |                                | <i>% OSTK</i>                     |                  | 6.8 (4.9, 9)    |                 | 5.4 (3.9, 7.6)  |                | 3.3 (2.3, 4.6) |                | 1.9 (1.3, 2.8) |                | 0.9 (0.6, 1.3) |                | 0.2 (0.1, 0.3) | <b>M: 0.7 (0.6, 0.9)</b><br><b>F: 0.4 (0.3, 0.5)</b> |
|                             |                                      | <b>Education</b>               |                                   |                  |                 |                 |                 |                |                |                |                |                |                |                |                |                                                      |
|                             |                                      | <High-school                   | <i>N deaths</i>                   | 1 (1, 2)         | 0 (0, 1)        | 3 (2, 5)        | 3 (2, 5)        | 11 (7, 17)     | 7 (4, 11)      | 19 (10, 32)    | 7 (4, 12)      | 16 (9, 26)     | 13 (6, 23)     | 20 (10, 37)    | 27 (12, 48)    | 131 (104, 163)                                       |
|                             |                                      |                                | <i>% OSTK</i>                     | 9.2 (5.5, 14.1)  | 8 (4.9, 12)     | 7.8 (4.7, 12.2) | 7.4 (4.5, 11.5) | 4.3 (2.5, 6.6) | 4 (2, 6.6)     | 2.8 (1.5, 4.9) | 1.7 (1, 2.9)   | 1.2 (0.6, 1.9) | 1.1 (0.6, 2)   | 0.4 (0.2, 0.7) | 0.2 (0.1, 0.4) | 0.6 (0.5, 0.8)                                       |
|                             |                                      | High-school                    | <i>N deaths</i>                   | 3 (2, 5)         | 2 (1, 3)        | 11 (6, 17)      | 6 (4, 10)       | 23 (14, 36)    | 16 (10, 25)    | 43 (24, 68)    | 28 (15, 48)    | 33 (19, 55)    | 27 (13, 51)    | 54 (23, 97)    | 77 (224, 336)  |                                                      |
|                             |                                      |                                | <i>% OSTK</i>                     | 10.9 (6.5, 16.5) | 7.2 (4.3, 11)   | 6.8 (3.9, 10.7) | 5.9 (3.5, 9.1)  | 3.6 (2.2, 5.6) | 3.3 (2, 5.2)   | 2.3 (1, 3.6)   | 2 (1, 3.5)     | 1.1 (0.6, 1.8) | 0.7 (0.4, 1.2) | 0.3 (0.1, 0.5) | 0.2 (0.1, 0.4) | 0.6 (0.5, 0.7)                                       |
|                             |                                      | College                        | <i>N deaths</i>                   | 0 (0, 0)         | 0 (0, 0)        | 1 (0, 1)        | 1 (0, 1)        | 3 (1, 5)       | 1 (1, 2)       | 7 (3, 11)      | 2 (1, 3)       | 5 (3, 9)       | 2 (1, 3)       | 8 (4, 16)      | 5 (1, 11)      | 35 (26, 46)                                          |
|                             |                                      |                                | <i>% OSTK</i>                     | 4.6 (2.6, 6.9)   | 2.7 (1.6, 4.3)  | 3.4 (1.9, 5.5)  | 2.5 (1.4, 3.8)  | 2.6 (1.3, 4.6) | 1.5 (0.8, 2.6) | 1.6 (0.8, 2.7) | 0.7 (0.3, 1.3) | 0.6 (0.3, 1)   | 0.4 (0.2, 0.7) | 0.2 (0.1, 0.4) | 0.1 (0, 0.2)   | 0.3 (0.2, 0.4)                                       |
|                             |                                      | <b>Race</b>                    |                                   |                  |                 |                 |                 |                |                |                |                |                |                |                |                |                                                      |
|                             |                                      | White                          | <i>N deaths</i>                   | 2 (1, 3)         | 1 (1, 2)        | 6 (4, 10)       | 5 (3, 8)        | 19 (11, 29)    | 12 (6, 19)     | 35 (21, 56)    | 16 (8, 27)     | 32 (18, 51)    | 21 (11, 37)    | 46 (21, 86)    | 55 (26, 96)    | 259 (202, 319)                                       |
|                             |                                      |                                | <i>% OSTK</i>                     | 8.3 (5, 12.7)    | 5.8 (3.4, 9)    | 5.7 (3.4, 9)    | 5.3 (3, 8.1)    | 3.3 (1.9, 5.2) | 2.9 (1.6, 4.6) | 1.8 (1.1, 2.9) | 1.3 (0.7, 2.2) | 0.8 (0.5, 1.3) | 0.6 (0.3, 1.1) | 0.3 (0.1, 0.3) | 0.4 (0.3, 0.5) | 1.4 (1.1, 1.6)                                       |
|                             |                                      | Black                          | <i>N deaths</i>                   | 1 (1, 2)         | 1 (0, 1)        | 6 (3, 8)        | 3 (2, 5)        | 12 (7, 18)     | 11 (6, 18)     | 21 (12, 34)    | 14 (8, 22)     | 15 (9, 24)     | 12 (7, 1       |                |                |                                                      |

**eTable 14. Absolute and proportional cardiometabolic disease mortality associated with suboptimal dietary habits in the US in 2012 by population subgroups (continued)**

| Dietary Factor <sup>a</sup>             | Cardiometabolic Disease <sup>b</sup> | Population strata <sup>c</sup> | Associated mortality <sup>d</sup> | Age                                         |                                            |                                             |                                            |                                                 |                                                |                                                 |                                                |                                                 |                                                    |                                                    |                                                                  | Total (25+ y)<br>(95% UIs)                                                                                              |
|-----------------------------------------|--------------------------------------|--------------------------------|-----------------------------------|---------------------------------------------|--------------------------------------------|---------------------------------------------|--------------------------------------------|-------------------------------------------------|------------------------------------------------|-------------------------------------------------|------------------------------------------------|-------------------------------------------------|----------------------------------------------------|----------------------------------------------------|------------------------------------------------------------------|-------------------------------------------------------------------------------------------------------------------------|
|                                         |                                      |                                |                                   | 25-34 y                                     |                                            | 35-44 y                                     |                                            | 45-54 y                                         |                                                | 55-64 y                                         |                                                | 65-74 y                                         |                                                    | 75+ y                                              |                                                                  |                                                                                                                         |
|                                         |                                      |                                |                                   | Males<br>(95% UIs)                          | Females<br>(95% UIs)                       | Males<br>(95% UIs)                          | Females<br>(95% UIs)                       | Males<br>(95% UIs)                              | Females<br>(95% UIs)                           | Males<br>(95% UIs)                              | Females<br>(95% UIs)                           | Males<br>(95% UIs)                              | Females<br>(95% UIs)                               | Males<br>(95% UIs)                                 | Females<br>(95% UIs)                                             |                                                                                                                         |
|                                         |                                      | <b>Total</b>                   | <i>N deaths</i><br>% <i>OSTK</i>  | 5.7 (3.1, 9.1)<br>2 (1, 3)<br>8.3 (5, 12.7) | 0.6 (0.3, 1.1)<br>1 (1, 2)<br>5.8 (3.4, 9) | 4.3 (2.4, 6.8)<br>6 (4, 10)<br>5.7 (3.4, 9) | 2.5 (1.3, 4.3)<br>5 (3, 8)<br>5.3 (3, 8.1) | 1.9 (0.9, 3.2)<br>19 (11, 29)<br>3.3 (1.9, 5.2) | 1.6 (0.8, 2.7)<br>15 (6, 19)<br>2.9 (1.6, 4.6) | 2.9 (1.4, 5.2)<br>32 (21, 56)<br>1.8 (1.1, 2.9) | 0.6 (0.3, 1.1)<br>16 (8, 27)<br>1.3 (0.7, 2.2) | 0.9 (0.3, 1.7)<br>21 (10, 37)<br>0.6 (0.3, 1.1) | 1.1 (0.2, 2.5)<br>1.1 (0.7, 2.2)<br>0.2 (0.1, 0.4) | 0.2 (0.1, 0.4)<br>426 (345, 512)<br>0.2 (0.1, 0.3) | 0.6 (0.4, 0.8)<br><b>426 (345, 512)</b><br><b>0.5 (0.4, 0.6)</b> |                                                                                                                         |
| <b>SSBs<sup>f</sup></b>                 | <b>Diabetes</b>                      | <b>Overall by age</b>          | <i>N deaths</i>                   | 361 (230, 481)                              | 955 (587, 1336)                            | 1902 (1220, 2629)                           | 2717 (1634, 3854)                          | 1977 (1278, 2854)                               | 2107 (1417, 2815)                              |                                                 |                                                |                                                 |                                                    |                                                    |                                                                  | <b>M: 6010 (4693, 7380)</b><br><b>F: 4027 (3105, 5124)</b><br><b>M: 16.9 (13.2, 20.8)</b><br><b>F: 12.4 (9.6, 15.8)</b> |
| <b>(&gt;0 g/d)</b>                      |                                      | <b>% DM</b>                    | <i>N deaths</i>                   | 60.3 (38.4, 80.5)                           | 55.4 (34.1, 77.5)                          | 35.2 (22.5, 48.6)                           | 23.3 (14, 33.1)                            | 12.9 (8.3, 18.6)                                | 6.3 (4.3, 8.5)                                 |                                                 |                                                |                                                 |                                                    |                                                    |                                                                  |                                                                                                                         |
|                                         |                                      | <b>Education</b>               |                                   |                                             |                                            |                                             |                                            |                                                 |                                                |                                                 |                                                |                                                 |                                                    |                                                    |                                                                  |                                                                                                                         |
|                                         |                                      | <High-school                   | <i>N deaths</i><br>% <i>DM</i>    | 54 (30, 73)<br>66.7 (36.9, 89.6)            | 36 (20, 51)<br>63.3 (35.6, 90.1)           | 163 (97, 220)<br>67.3 (40.2, 91)            | 99 (46, 144)<br>73 (33.7, 107)             | 300 (158, 434)<br>42.9 (22.6, 62.1)             | 186 (89, 286)<br>44.2 (21.1, 67.9)             | 412 (215, 657)<br>31.4 (16.4, 50.1)             | 180 (82, 287)<br>20 (9.1, 31.8)                | 344 (170, 549)<br>16.3 (8, 25.9)                | 305 (134, 494)<br>18.1 (8, 29.3)                   | 387 (217, 573)<br>9.1 (5.1, 13.5)                  | 429 (236, 653)<br>6.9 (3.8, 10.5)                                | 2904 (2432, 3428)<br>16 (3.4, 18.9)                                                                                     |
|                                         |                                      | High-school                    | <i>N deaths</i><br>% <i>DM</i>    | 176 (101, 234)<br>75.7 (43.7, 100.7)        | 105 (56, 163)<br>61.6 (32.5, 95.4)         | 441 (234, 627)<br>60.3 (32, 85.7)           | 276 (138, 442)<br>61.7 (30.8, 98.6)        | 861 (466, 1244)<br>38 (20.6, 54.9)              | 481 (223, 745)<br>34.7 (16.1, 53.7)            | 753 (365, 1346)<br>24.5 (11.9, 36.2)            | 735 (379, 1212)<br>25.3 (12.3, 45.3)           | 484 (231, 781)<br>14.3 (7.4, 23.7)              | 521 (310, 788)<br>12 (5.7, 19.4)                   | 641 (345, 967)<br>6.7 (4, 10.1)                    | 6637 (5599, 7851)<br>16.6 (14, 19.6)                             | 6637 (5599, 7851)<br>16.6 (14, 19.6)                                                                                    |
|                                         |                                      | College                        | <i>N deaths</i><br>% <i>DM</i>    | 12 (6, 17)<br>37.6 (18.7, 55.5)             | 16 (8, 22)<br>26.9 (13.9, 43.6)            | 31 (15, 48)<br>35.4 (17.7, 54.9)            | 17 (7, 29)<br>27.1 (11.6, 44)              | 107 (43, 220)<br>32 (13, 65.9)                  | 28 (15, 43)<br>15.3 (8.3, 23.8)                | 174 (91, 284)<br>17.3 (9.1, 28.2)               | 51 (22, 92)<br>9.8 (4.2, 17.6)                 | 101 (46, 171)<br>7.5 (3.4, 12.8)                | 39 (17, 69)<br>5.7 (2.4, 10)                       | 125 (72, 198)<br>5 (2.9, 8)                        | 51 (21, 97)<br>3.3 (1.3, 6.3)                                    | 748 (604, 967)<br>9 (7.3, 11.7)                                                                                         |
|                                         |                                      | <b>Race</b>                    |                                   |                                             |                                            |                                             |                                            |                                                 |                                                |                                                 |                                                |                                                 |                                                    |                                                    |                                                                  |                                                                                                                         |
|                                         |                                      | White                          | <i>N deaths</i><br>% <i>DM</i>    | 141 (76, 199)<br>74.3 (39.9, 104.9)         | 77 (32, 131)<br>60.5 (25.4, 103.3)         | 303 (163, 421)<br>50.4 (27, 69.9)           | 184 (90, 284)<br>48.6 (23.9, 75)           | 764 (357, 1155)<br>37.2 (17.4, 56.2)            | 324 (166, 486)<br>28.1 (14.4, 42.3)            | 1030 (564, 1557)<br>21.8 (11.9, 32.9)           | 532 (234, 1012)<br>19.7 (8.6, 37.4)            | 691 (334, 1117)<br>11.3 (5.4, 18.2)             | 499 (214, 846)<br>12.1 (5.2, 20.5)                 | 759 (438, 1105)<br>6.7 (3.9, 9.7)                  | 661 (362, 1032)<br>5.1 (2.8, 7.9)                                | 6005 (4954, 7029)<br>12.9 (10.6, 15.1)                                                                                  |
|                                         |                                      | Black                          | <i>N deaths</i><br>% <i>DM</i>    | 55 (30, 74)<br>57.5 (31.6, 76.9)            | 48 (26, 66)<br>59.1 (32.2, 81.6)           | 162 (92, 221)<br>58.2 (33.1, 79.3)          | 99 (53, 137)<br>54.3 (29, 75.4)            | 289 (159, 408)<br>38.3 (21, 54)                 | 243 (128, 353)<br>154 (86, 225)                | 393 (203, 576)<br>34.3 (19.6, 49.1)             | 310 (162, 453)<br>28.4 (14.9, 41.5)            | 292 (149, 446)<br>19.8 (10.1, 30.3)             | 283 (138, 427)<br>20.3 (9.9, 30.7)                 | 425 (250, 622)<br>10.4 (6.1, 16.1)                 | 2773 (2366, 3190)<br>14.5 (8.5, 21.2)                            | 1637 (1599, 7851)<br>23.4 (20, 26.9)                                                                                    |
|                                         |                                      | Hispanic                       | <i>N deaths</i><br>% <i>DM</i>    | 28 (15, 38)<br>56.1 (30.6, 75.3)            | 16 (8, 22)<br>51 (26.4, 72.2)              | 70 (34, 96)<br>50 (24, 68.5)                | 25 (13, 37)<br>38.1 (19.6, 56.7)           | 154 (86, 225)<br>38.3 (21.4, 56.1)              | 63 (35, 91)<br>29.1 (16.2, 42.1)               | 179 (96, 273)<br>24.6 (13.1, 37.5)              | 101 (47, 165)<br>20.5 (9.5, 33.6)              | 130 (64, 197)<br>15.7 (7.7, 23.9)               | 105 (42, 364)<br>15 (5.9, 51.9)                    | 83 (46, 125)<br>3.2 (2.9, 10.5)                    | 1044 (869, 1334)<br>4.9 (2.7, 7.5)                               | 15.9 (13.3, 20.4)<br>30 (15, 49)                                                                                        |
|                                         |                                      | Other                          | <i>N deaths</i><br>% <i>DM</i>    | 4 (2, 6)<br>43.3 (22.3, 63.9)               | 5 (2, 9)<br>36 (16.3, 65.5)                | 25 (12, 37)<br>41.1 (20.7, 60.9)            | 4 (2, 7)<br>22.7 (11.4, 37.8)              | 34 (17, 56)<br>19.2 (9.7, 31.4)                 | 15 (7, 24)<br>16.1 (7.7, 25.8)                 | 99 (46, 155)<br>29.5 (13.9, 46.3)               | 15 (7, 25)<br>7 (3.1, 12.2)                    | 39 (16, 71)<br>11.2 (4.7, 20.1)                 | 36 (15, 49)<br>16.1 (4.6, 33.1)                    | 32 (10, 57)<br>5 (2.6, 8.2)                        | 360 (282, 609)<br>4.3 (1.4, 10)                                  | 15.9 (13.3, 20.4)<br>12.3 (9.6, 20.8)                                                                                   |
|                                         |                                      | <b>Total</b>                   | <i>N deaths</i><br>% <i>DM</i>    | 141 (76, 199)<br>74.3 (39.9, 104.9)         | 77 (32, 131)<br>60.5 (25.4, 103.3)         | 303 (163, 421)<br>50.4 (27, 69.9)           | 184 (90, 284)<br>48.6 (23.9, 75)           | 764 (357, 1155)<br>37.2 (17.4, 56.2)            | 324 (166, 486)<br>28.1 (14.4, 42.3)            | 1030 (564, 1557)<br>21.8 (11.9, 32.9)           | 532 (234, 1012)<br>19.7 (8.6, 37.4)            | 691 (334, 1117)<br>11.3 (5.4, 18.2)             | 499 (214, 846)<br>12.1 (5.2, 20.5)                 | 759 (438, 1105)<br>6.7 (3.9, 9.7)                  | 661 (362, 1032)<br>5.1 (2.8, 7.9)                                | <b>10043 (8419, 11979)</b><br><b>14.8 (12.4, 17.6)</b>                                                                  |
| <b>SSBs<sup>f</sup></b>                 | <b>Cardiometabolic disease</b>       | <b>Overall by age</b>          | <i>N deaths</i>                   | 982 (789, 1170)                             | 3620 (2826, 4506)                          | 9066 (6839, 11324)                          | 13007 (9820, 16060)                        | 9441 (7322, 11908)                              | 15418 (12608, 18835)                           |                                                 |                                                |                                                 |                                                    |                                                    |                                                                  | <b>M: 33315 (28713, 37655)</b><br><b>F: 18374 (15507, 21446)</b><br><b>M: 9.3 (8, 10.5)</b><br><b>F: 5.3 (4.5, 6.2)</b> |
| <b>(&gt;0 g/d)</b>                      |                                      | <b>% CMD</b>                   | <i>N deaths</i>                   | 26.8 (21.6, 32)                             | 28.9 (22.5, 35.9)                          | 21.4 (16.2, 26.8)                           | 15.1 (11.4, 18.6)                          | 8.2 (6.4, 10.3)                                 | 3.5 (2.8, 4.3)                                 |                                                 |                                                |                                                 |                                                    |                                                    |                                                                  |                                                                                                                         |
|                                         |                                      | <b>Education</b>               |                                   |                                             |                                            |                                             |                                            |                                                 |                                                |                                                 |                                                |                                                 |                                                    |                                                    |                                                                  |                                                                                                                         |
|                                         |                                      | <High-school                   | <i>N deaths</i><br>% <i>CMD</i>   | 161 (124, 196)<br>30.7 (23.6, 37.4)         | 73 (53, 90)<br>29 (21.2, 35.8)             | 631 (467, 771)<br>38.2 (28.3, 46.7)         | 301 (218, 388)<br>37 (26.8, 47.8)          | 1562 (1119, 1993)<br>27.1 (19.4, 34.6)          | 689 (489, 889)<br>26.1 (18.6, 33.7)            | 2137 (1448, 2916)<br>21 (14.2, 28.6)            | 632 (443, 847)<br>12.3 (8.6, 16.5)             | 1690 (1148, 2348)<br>11 (7.5, 15.3)             | 1093 (707, 1571)<br>11 (7.1, 15.7)                 | 2584 (1760, 3468)<br>5.4 (3.7, 7.3)                | 2629 (1840, 3550)<br>3.8 (2.6, 5.1)                              | 14248 (12547, 15930)<br>8.4 (7.4, 9.4)                                                                                  |
|                                         |                                      | High-school                    | <i>N deaths</i><br>% <i>CMD</i>   | 558 (431, 663)<br>34.7 (26.8, 41.3)         | 216 (155, 282)<br>26.6 (19.1, 34.8)        | 1941 (1417, 2470)<br>33.8 (24.7, 43)        | 818 (587, 1091)<br>30.1 (21.6, 40.2)       | 4584 (3288, 5881)<br>23.8 (17.1, 30.6)          | 1725 (1255, 2244)<br>19.1 (13.9, 24.8)         | 6053 (4131, 8017)<br>16.3 (11.1, 21.5)          | 2826 (1880, 3886)<br>9.7 (6.5, 13.4)           | 4019 (2680, 5564)<br>7 (4.7, 9.5)               | 1986 (1327, 2691)<br>4 (2.8, 5.5)                  | 3982 (2821, 5468)<br>3.1 (2.2, 4.2)                | 4782 (3302, 6366)<br>8.1 (7.2, 9.2)                              | 33524 (29963, 37419)<br>16.6 (14, 19.6)                                                                                 |
|                                         |                                      | College                        | <i>N deaths</i><br>% <i>CMD</i>   | 40 (29, 51)<br>15.1 (11.1, 19.6)            | 15 (11, 20)<br>9.1 (6.5, 12)               | 166 (115, 226)<br>17.7 (12.2, 24)           | 47 (33, 62)<br>9.8 (6.9, 12.9)             | 656 (424, 964)<br>7.5 (5.3, 10.2)               | 102 (72, 138)<br>11.4 (7.8, 16.2)              | 1037 (706, 1476)<br>5.5 (3.3, 8.8)              | 198 (131, 289)<br>4.8 (3.1, 7.8)               | 584 (379, 848)<br>3.1 (1.9, 4.8)                | 156 (96, 241)<br>2.6 (1.8, 4.1)                    | 1080 (694, 1582)<br>1.6 (0.8, 2.8)                 | 435 (214, 751)<br>2.8 (1.8, 4.1)                                 | 4564 (3870, 5429)<br>8.1 (7.2, 9.2)                                                                                     |
|                                         |                                      | <b>Race</b>                    |                                   |                                             |                                            |                                             |                                            |                                                 |                                                |                                                 |                                                |                                                 |                                                    |                                                    |                                                                  |                                                                                                                         |
|                                         |                                      | White                          | <i>N deaths</i><br>% <i>CMD</i>   | 461 (348, 576)<br>34.3 (25.9, 42.9)         | 171 (113, 239)<br>25.5 (16.8, 35.5)        | 1466 (1068, 1900)<br>29.6 (21.6, 38.4)      | 608 (439, 792)<br>25.6 (18.5, 33.3)        | 4778 (3229, 6352)<br>24.7 (16.7, 32.8)          | 1321 (964, 1702)<br>16.2 (11.9, 20.9)          | 6098 (4221, 8098)<br>14.7 (10.2, 19.5)          | 2205 (1411, 3122)<br>12.1 (7.8, 17.2)          | 4047 (2689, 5536)<br>7.5 (5, 10.2)              | 2225 (1381, 3188)<br>7 (4.3, 10)                   | 6276 (4464, 8139)<br>3.9 (2.8, 5.1)                | 5424 (3896, 7236)<br>2.6 (1.9, 3.4)                              | 35170 (31116, 39318)<br>6.4 (5.6, 7.1)                                                                                  |
|                                         |                                      | Black                          | <i>N deaths</i><br>% <i>CMD</i>   | 154 (117, 187)<br>25.1 (19.1, 30.5)         | 91 (67, 112)<br>25.3 (18.6, 31.2)          | 588 (463, 706)<br>28.5 (22.4, 34.2)         | 258 (193, 313)<br>22.3 (16.7, 27)          | 1230 (915, 1534)<br>21.1 (15.8, 26.7)           | 774 (578, 977)<br>17.1 (12.5, 21.7)            | 1769 (1295, 2248)<br>10.2 (7.8, 12.7)           | 1024 (728, 1329)<br>12.8 (8.5, 17.4)           | 1195 (857, 1561)<br>12.3 (8.8, 16)              | 915 (645, 1172)<br>12.1 (8.5, 15.5)                | 851 (591, 1161)<br>6.1 (4.3, 8.4)                  | 1845 (1345, 2393)<br>8.1 (5.9, 10.5)                             | 10689 (9741, 11754)<br>16.6 (14, 19.6)                                                                                  |
|                                         |                                      | Hispanic                       | <i>N deaths</i><br>% <i>CMD</i>   | 73 (58, 89)<br>22.4 (17.9, 27.2)            | 28 (20, 35)<br>20.2 (14.8, 25.8)           | 240 (182, 298)<br>24 (18.2, 29.9)           | 61 (46, 78)<br>16.6 (12.4, 20.9)           | 581 (422, 742)<br>23.2 (16.9, 29.7)             | 162 (120, 203)<br>15.3 (11.4, 19.3)            | 690 (498, 904)<br>16.4 (11.9, 21.5)             | 269 (178, 364)<br>12.8 (8.5, 17.4)             | 488 (338, 645)<br>10.7 (7.4, 14.1)              | 290 (173, 606)<br>9.4 (5.6, 19.7)                  | 375 (205, 595)<br>3.9 (2.1, 6.1)                   | 369 (255, 498)<br>2.9 (2, 3.9)                                   | 3657 (3240, 4154)<br>8.7 (7.7, 9.9)                                                                                     |
|                                         |                                      | Other                          | <i>N deaths</i><br>% <i>CMD</i>   | 23 (16, 29)<br>17.3 (12.2, 21.9)            | 8 (5, 13)<br>11 (6.9, 17.4)                | 109 (73, 139)<br>24 (16, 30.7)              | 15 (11, 20)<br>8.9 (6.3, 11.8)             | 158 (99, 227)<br>12.7 (8, 18.3)                 | 40 (28, 53)<br>8.4 (5.9, 11.1)                 | 423 (277, 588)<br>19.5 (12.8, 27.2)             | 44 (28, 62)<br>4.1 (2.7, 5.8)                  | 47 (27, 588)<br>7.1 (4.2, 11)                   | 165 (82, 416)<br>9.9 (4.9, 24.8)                   | 170 (105, 248)<br>3 (1.8, 4.4)                     | 169 (75, 819)<br>2.4 (1.1, 11.6)                                 | 1526 (1281, 2278)<br>6.7 (5.6, 10)                                                                                      |
|                                         |                                      | <b>Total</b>                   | <i>N deaths</i><br>% <i>CMD</i>   | 461 (348, 576)<br>34.3 (25.9, 42.9)         | 171 (113, 239)<br>25.5 (16.8, 35.5)        | 1466 (1068, 1900)<br>29.6 (21.6, 38.4)      | 608 (439, 792)<br>25.6 (18.5, 33.3)        | 4778 (3229, 6352)<br>24.7 (16.7, 32.8)          | 1321 (964, 1702)<br>16.2 (11.9, 20.9)          | 6098 (4221, 8098)<br>14.7 (10.2, 19.5)          | 2205 (1411, 3122)<br>12.1 (7.8, 17.2)          | 4047 (2689, 5536)<br>7.5 (5, 10.2)              | 2225 (1381, 3188)<br>7 (4.3, 10)                   | 6276 (4464, 8139)<br>3.9 (2.8, 5.1)                | 5424 (3896, 7236)<br>2.6 (1.9, 3.4)                              | <b>51694 (46363, 57156)</b><br><b>7.4 (6.6, 8.1)</b>                                                                    |
| <b>PUFA replacing Carbs<sup>f</sup></b> | <b>Coronary heart disease</b>        | <b>Overall by age</b>          | <i>N deaths</i>                   | 112 (66, 152)                               | 493 (310, 689)                             | 1720 (1060, 2390)                           | 3054 (1805, 4168)                          | 3451 (2248, 4832)                               | 7221 (4986, 9359)                              |                                                 |                                                |                                                 |                                                    |                                                    |                                                                  | <b>M: 10056 (7766, 12353)</b><br><b>F: 5995 (4306, 7630)</b><br><b>M: 4.9 (3.8, 6)</b><br><b>F: 3.6 (2.6, 4.6)</b>      |
| <b>(&lt;11% E/d)</b>                    |                                      | <b>% CHD</b>                   | <i>N deaths</i>                   | 10.9 (6.4, 14.8)                            | 9.5 (6, 13.3)                              | 7.8 (4.8, 10.9)                             | 6.4 (3.8, 8.7)                             | 5.5 (3.6, 7.7)                                  | 3.1 (2.1, 4)                                   |                                                 |                                                |                                                 |                                                    |                                                    |                                                                  |                                                                                                                         |
|                                         |                                      | <b>Education</b>               |                                   |                                             |                                            |                                             |                                            |                                                 |                                                |                                                 |                                                |                                                 |                                                    |                                                    |                                                                  |                                                                                                                         |
|                                         |                                      | <High-school                   | <i>N deaths</i><br>% <i>CHD</i>   | 21 (11, 31)<br>12.6 (6.7, 18.6)             | 7 (4, 11)<br>12.4 (6.5, 18.5)              | 79 (43, 118)<br>10.8 (5.9, 16)              | 32 (16, 47)<br>11.1 (5.6, 16)              | 245 (117, 414)<br>7.7 (3.7, 13)                 | 103 (51, 152)<br>6.6 (3.5, 10.2)               | 397 (208, 613)<br>6.6 (3.4, 10.2)               | 161 (84, 249)<br>6.6 (3.4, 10.2)               | 498 (261, 784)<br>5.6 (2.9, 8.8)                | 287 (145, 430)<br>6.9 (3.6, 12.7)                  | 878 (489, 1288)<br>3.2 (1.8, 4.7)                  | 1031 (560, 1521)<br>2.7 (1.5, 4)                                 | 3766 (3045, 4523)<br>4.2 (3.4, 5.1)                                                                                     |
|                                         |                                      | High-school                    | <i>N deaths</i><br>% <i>CHD</i>   | 57 (31, 85)<br>11.2 (6.1, 16.6)             | 18 (9, 26)<br>10.4 (5.5, 15.3)             | 258 (130, 379)<br>9.8 (4.9, 14.4)           | 76 (36, 116)<br>8.4 (4, 12.8)              | 912 (494, 1365)<br>8.3 (4.5, 12.5)              | 252 (127, 391)<br>6.7 (3.4, 10.4)              | 1512 (757, 2217)<br>6.8 (3.4, 10)               | 467 (248, 707)<br>5.3 (2.8, 8.1)               | 1465 (767, 2224)<br>6 (3.1, 9.1)                | 696 (366, 1040)<br>5.1 (2.7, 7.7)                  | 1973 (1199, 2860)<br>3.4 (2.1, 4.9)                | 2020 (1186, 2983)<br>2.7 (1.6, 4)                                | 9789 (8054, 11376)<br>4.5 (3.7, 5.2)                                                                                    |
|                                         |                                      | College                        | <i>N deaths</i><br>% <i>CHD</i>   | 7 (3, 11)<br>9.7 (4.6, 14.8)                | 3 (2, 5)<br>10.2 (5.6, 15.3)               | 37 (20, 57)<br>10.6 (5.3, 15.8)             | 10 (5, 15)<br>8.4 (4.4, 12.7)              | 144 (75, 218)<br>7.7 (4, 11.7)                  | 36 (17, 55)<br>5.5 (2.4, 9.9)                  | 347 (178, 542)<br>6.4 (3.8, 9.2)                | 88 (44, 135)<br>5.5 (2.8, 8.4)                 | 350 (170, 544)<br>5 (2.4, 7.7)                  | 115 (58, 177)<br>5.2 (2.6, 7.9)                    | 669 (367, 994                                      |                                                                  |                                                                                                                         |



**eTable 14. Absolute and proportional cardiometabolic disease mortality associated with suboptimal dietary habits in the US in 2012 by population subgroups (continued)**

| Dietary Factor <sup>a</sup>                                       | Cardiometabolic Disease <sup>b</sup> | Population strata <sup>c</sup>                                  | Associated mortality <sup>d</sup>                                 | Age                                                             |                                              |                                                 |                                               |                                                   |                                                              |                                                 |                                                       |                                                 |                                                             |                                                |                                                      | Total (25+ y)<br>(95% UIs)                                                                 |                                     |                                                      |                                     |                                                      |
|-------------------------------------------------------------------|--------------------------------------|-----------------------------------------------------------------|-------------------------------------------------------------------|-----------------------------------------------------------------|----------------------------------------------|-------------------------------------------------|-----------------------------------------------|---------------------------------------------------|--------------------------------------------------------------|-------------------------------------------------|-------------------------------------------------------|-------------------------------------------------|-------------------------------------------------------------|------------------------------------------------|------------------------------------------------------|--------------------------------------------------------------------------------------------|-------------------------------------|------------------------------------------------------|-------------------------------------|------------------------------------------------------|
|                                                                   |                                      |                                                                 |                                                                   | 25-34 y                                                         |                                              | 35-44 y                                         |                                               | 45-54 y                                           |                                                              | 55-64 y                                         |                                                       | 65-74 y                                         |                                                             | 75+ y                                          |                                                      |                                                                                            |                                     |                                                      |                                     |                                                      |
|                                                                   |                                      |                                                                 |                                                                   | Males<br>(95% UIs)                                              | Females<br>(95% UIs)                         | Males<br>(95% UIs)                              | Females<br>(95% UIs)                          | Males<br>(95% UIs)                                | Females<br>(95% UIs)                                         | Males<br>(95% UIs)                              | Females<br>(95% UIs)                                  | Males<br>(95% UIs)                              | Females<br>(95% UIs)                                        | Males<br>(95% UIs)                             | Females<br>(95% UIs)                                 |                                                                                            |                                     |                                                      |                                     |                                                      |
| <b>PUFA replacing Carbs<sup>e</sup></b><br>( <b>&lt;11% E/d</b> ) | <b>Cardiometabolic disease</b>       | <b>Total</b>                                                    | <i>N deaths</i><br>83 (40, 122)<br><i>% CHD</i><br>10.9 (5.2, 16) | 28 (13, 41)<br>10.7 (5.1, 15.8)                                 | 377 (200, 564)<br>9.8 (5.2, 14.7)            | 118 (65, 179)<br>8.8 (4.8, 13.3)                | 1314 (678, 1951)<br>8 (4.1, 11.9)             | 407 (211, 609)<br>7.3 (3.8, 11)                   | 2297 (1159, 3382)<br>6.6 (3.3, 9.8)                          | 748 (361, 1104)<br>5.7 (2.8, 8.4)               | 2352 (1257, 3561)<br>5.6 (3, 8.5)                     | 1106 (577, 1658)<br>5.3 (2.7, 7.9)              | 3605 (2078, 5147)<br>3.3 (1.9, 4.7)                         | 3569 (2076, 5141)<br>2.9 (1.7, 4.2)            | <b>16025 (13280, 18925)</b><br><b>4.3 (3.6, 5.1)</b> |                                                                                            |                                     |                                                      |                                     |                                                      |
|                                                                   |                                      | <b>Overall by age</b>                                           | <i>N deaths</i><br>112 (66, 152)                                  | 493 (310, 689)                                                  | 1720 (1060, 2390)                            | 3054 (1805, 4168)                               | 3451 (2248, 4832)                             | 7221 (4986, 9359)                                 | <b>M: 10056 (7766, 12353)</b><br><b>F: 5995 (4306, 7630)</b> |                                                 |                                                       |                                                 |                                                             |                                                |                                                      |                                                                                            |                                     |                                                      |                                     |                                                      |
|                                                                   |                                      | <b>% CMD</b>                                                    | 3.1 (1.8, 4.2)                                                    | 3.9 (2.5, 5.5)                                                  | 4.1 (2.5, 5.6)                               | 3.5 (2.1, 4.8)                                  | 3 (2, 4.2)                                    | 1.6 (1.1, 2.1)                                    | <b>M: 2.8 (2.2, 3.4)</b><br><b>F: 1.7 (1.3, 2.2)</b>         |                                                 |                                                       |                                                 |                                                             |                                                |                                                      |                                                                                            |                                     |                                                      |                                     |                                                      |
|                                                                   |                                      | <b>Education</b>                                                | <i>N deaths</i><br><i>% CMD</i>                                   | 7 (4, 11)<br>2.8 (1.5, 4.2)                                     | 79 (43, 118)<br>4.8 (2.6, 7.1)               | 32 (16, 47)<br>4 (2, 5.8)                       | 245 (117, 414)<br>4.3 (2, 7.2)                | 103 (51, 152)<br>3.9 (1.9, 5.8)                   | 397 (208, 613)<br>3.9 (2, 6)                                 | 161 (84, 249)<br>3.1 (1.6, 4.9)                 | 498 (261, 784)<br>3.2 (1.7, 5.1)                      | 287 (145, 430)<br>2.9 (1.5, 4.3)                | 878 (489, 1288)<br>1.8 (1, 2.7)                             | 1031 (560, 1521)<br>1.5 (0.8, 2.2)             | 3766 (3045, 4523)<br>2.2 (1.8, 2.7)                  |                                                                                            |                                     |                                                      |                                     |                                                      |
|                                                                   |                                      | <High-school                                                    | <i>N deaths</i><br><i>% CMD</i>                                   | 57 (31, 85)<br>3.6 (2, 5.3)                                     | 18 (9, 26)<br>2.2 (1.2, 3.2)                 | 258 (130, 379)<br>4.5 (2.3, 6.6)                | 76 (36, 116)<br>2.8 (1.4, 4.3)                | 912 (494, 1365)<br>4.7 (2.6, 7.1)                 | 252 (127, 391)<br>2.8 (1.4, 4.3)                             | 1512 (757, 2217)<br>4.1 (2, 6)                  | 467 (248, 707)<br>2.5 (1.3, 3.8)                      | 1465 (767, 2224)<br>3.5 (1.9, 5.4)              | 696 (366, 1040)<br>2.5 (1.3, 3.7)                           | 1973 (1199, 2860)<br>2 (1.2, 2.9)              | 2020 (1186, 2983)<br>1.3 (0.8, 2)                    | 9789 (8054, 11376)<br>2.4 (1.9, 2.7)                                                       |                                     |                                                      |                                     |                                                      |
|                                                                   |                                      | High-school                                                     | <i>N deaths</i><br><i>% CMD</i>                                   | 7 (3, 11)<br>2.8 (1.3, 4.2)                                     | 3 (2, 5)<br>2.1 (1.1, 3.1)                   | 37 (20, 57)<br>4 (2.2, 6.1)                     | 10 (5, 15)<br>2.1 (1.1, 3.2)                  | 144 (75, 218)<br>4.4 (2.3, 6.6)                   | 36 (17, 55)<br>2.7 (1.3, 4.1)                                | 347 (178, 542)<br>3.8 (2, 6)                    | 88 (44, 135)<br>2.4 (1.2, 3.8)                        | 350 (170, 544)<br>2.9 (1.4, 4.5)                | 88 (44, 135)<br>2.3 (1.1, 3.5)                              | 669 (367, 994)<br>1.7 (1, 2.6)                 | 2124 (1706, 2571)<br>1.2 (0.6, 1.8)                  | 2124 (1706, 2571)<br>2.1 (1.7, 2.5)                                                        |                                     |                                                      |                                     |                                                      |
|                                                                   |                                      | College                                                         | <i>N deaths</i><br><i>% CMD</i>                                   | 5 (3, 8)<br>3.8 (2, 5.9)                                        | 2 (1, 3)<br>1.2 (0.6, 1.9)                   | 37 (19, 55)<br>4.6 (2.4, 7.1)                   | 4 (2, 7)<br>2.8 (1.4, 4.2)                    | 111 (57, 166)<br>4.8 (2.3, 7.4)                   | 32 (18, 47)<br>1.9 (0.9, 3.1)                                | 167 (89, 251)<br>4.9 (2.3, 7.7)                 | 67 (34, 99)<br>1.7 (0.6, 3.4)                         | 166 (86, 247)<br>3.9 (2, 6.1)                   | 98 (52, 154)<br>3.2 (1.7, 4.7)                              | 54 (28, 82)<br>1.8 (1, 2.8)                    | 245 (141, 356)<br>1.8 (1.1, 2.6)                     | 1160 (969, 1371)<br>2.7 (2.2, 3.2)                                                         |                                     |                                                      |                                     |                                                      |
|                                                                   |                                      | Other                                                           | <i>N deaths</i><br><i>% CHD</i><br><i>% CMD</i>                   | 8 (4, 13)<br>2.8 (1.4, 4.2)<br>3.4 (1.6, 5.1)                   | 2 (1, 3)<br>1.6 (0.8, 2.5)<br>2.3 (1.1, 3.3) | 33 (17, 49)<br>4.6 (2.4, 7.1)<br>4.5 (2.4, 6.7) | 8 (4, 12)<br>2.8 (1.4, 4.2)<br>2.9 (1.6, 4.4) | 101 (53, 152)<br>4.8 (2.3, 7.4)<br>4.5 (2.3, 6.7) | 29 (15, 44)<br>1.9 (0.9, 3.1)<br>3.1 (1.6, 4.6)              | 152 (79, 229)<br>4.9 (2.3, 7.7)<br>3.9 (2, 5.8) | 59 (28, 91)<br>3.2 (1.6, 4.7)<br>2.7 (1.3, 4)         | 149 (77, 223)<br>3.6 (1.9, 5.4)<br>3.3 (1.8, 5) | 76 (39, 117)<br>2.8 (1.4, 4.2)<br>2.5 (1.3, 3.7)            | 6 (3.1, 9)<br>3.2 (1.7, 4.7)<br>1.9 (1.1, 2.7) | 208 (105, 304)<br>1.9 (1.1, 2.8)<br>1.4 (0.8, 2)     | 1048 (852, 1251)<br>2.8 (2.3, 3.3)<br><b>16025 (13280, 18925)</b><br><b>2.3 (1.9, 2.7)</b> |                                     |                                                      |                                     |                                                      |
|                                                                   |                                      | <b>Total</b>                                                    | <i>N deaths</i><br><i>% CHD</i>                                   | 83 (40, 122)<br>3.4 (1.6, 5.1)                                  | 28 (13, 41)<br>2.3 (1.1, 3.3)                | 377 (200, 564)<br>4.5 (2.4, 6.7)                | 118 (65, 179)<br>2.9 (1.6, 4.4)               | 1314 (678, 1951)<br>4.5 (2.3, 6.7)                | 407 (211, 609)<br>3.1 (1.6, 4.6)                             | 2297 (1159, 3382)<br>3.9 (2, 5.8)               | 748 (361, 1104)<br>2.7 (1.3, 4)                       | 2352 (1257, 3561)<br>3.3 (1.8, 5)               | 1106 (577, 1658)<br>2.5 (1.3, 3.7)                          | 3605 (2078, 5147)<br>1.9 (1.1, 2.7)            | 3569 (2076, 5141)<br>1.4 (0.8, 2)                    | <b>16025 (13280, 18925)</b><br><b>2.3 (1.9, 2.7)</b>                                       |                                     |                                                      |                                     |                                                      |
|                                                                   |                                      | <b>PUFA replacing SFA<sup>e</sup></b><br>( <b>&lt;11% E/d</b> ) | <b>Coronary heart disease</b>                                     | <b>Overall by age</b>                                           | <i>N deaths</i><br>100 (63, 140)             | 446 (252, 634)                                  | 1555 (947, 2220)                              | 2795 (1624, 3889)                                 | 3128 (1928, 4337)                                            | 6358 (4178, 8399)                               | <b>9078 (6891, 11275)</b><br><b>5293 (3776, 6946)</b> |                                                 |                                                             |                                                |                                                      |                                                                                            |                                     |                                                      |                                     |                                                      |
|                                                                   |                                      |                                                                 |                                                                   | <b>% CHD</b>                                                    | 9.8 (6.1, 13.7)                              | 8.6 (4.9, 12.2)                                 | 7.1 (4.3, 10.1)                               | 5.9 (3.4, 8.2)                                    | 5 (3.1, 6.9)                                                 | 2.7 (1.8, 3.6)                                  | <b>4.4 (3.3, 5.5)</b><br><b>3.2 (2.3, 4.2)</b>        |                                                 |                                                             |                                                |                                                      |                                                                                            |                                     |                                                      |                                     |                                                      |
|                                                                   |                                      |                                                                 |                                                                   | <b>Education</b>                                                | <i>N deaths</i><br><i>% CHD</i>              | 6 (3, 9)<br>11.6 (6.1, 17.1)                    | 73 (39, 109)<br>11.1 (6, 16.5)                | 29 (15, 43)<br>10 (5.3, 14.9)                     | 222 (115, 365)<br>8.9 (4.2, 13.2)                            | 93 (45, 140)<br>7.8 (3.8, 11.8)                 | 368 (177, 560)<br>6.1 (3, 9.3)                        | 147 (71, 224)<br>6 (2.9, 9.2)                   | 460 (234, 734)<br>5.2 (2.6, 8.3)                            | 264 (139, 402)<br>5.5 (2.9, 8.4)               | 786 (426, 1102)<br>2.9 (1.6, 4)                      | 931 (540, 1396)<br>2.7 (1.6, 4.1)                                                          | 3416 (2760, 4066)<br>3.8 (3.1, 4.5) |                                                      |                                     |                                                      |
|                                                                   |                                      |                                                                 |                                                                   | <High-school                                                    | <i>N deaths</i><br><i>% CHD</i>              | 53 (26, 77)<br>10.3 (5.1, 15.1)                 | 16 (8, 24)<br>9.5 (4.6, 14.2)                 | 232 (122, 347)<br>8.8 (4.6, 13.2)                 | 67 (34, 106)<br>8.8 (4.6, 13.2)                              | 824 (411, 1265)<br>7.5 (3.8, 11.6)              | 232 (111, 367)<br>6.2 (3, 9.8)                        | 1361 (703, 2043)<br>6.2 (3, 9.8)                | 428 (208, 644)<br>4.9 (2.4, 7.4)                            | 1375 (647, 2036)<br>5.6 (2.4, 7)               | 626 (320, 944)<br>4.6 (2.4, 7)                       | 1800 (1043, 2584)<br>2.5 (1.4, 3.7)                                                        | 1830 (1058, 2775)<br>4 (3.3, 4.8)   | 8848 (7236, 10474)<br>4.2 (3.3, 4.8)                 |                                     |                                                      |
|                                                                   |                                      |                                                                 |                                                                   | High-school                                                     | <i>N deaths</i><br><i>% CHD</i>              | 7 (3, 10)<br>8.7 (4.1, 13.3)                    | 3 (2, 5)<br>9.4 (4.8, 14.2)                   | 35 (16, 51)<br>8.3 (3.9, 12.2)                    | 9 (4, 14)<br>7.7 (3.6, 11.6)                                 | 132 (66, 202)<br>7.1 (3.5, 10.8)                | 33 (17, 51)<br>6.8 (3.5, 10.3)                        | 320 (157, 484)<br>5.9 (2.9, 8.9)                | 82 (42, 125)<br>5.1 (2.6, 7.8)                              | 317 (157, 485)<br>4.5 (2.2, 6.9)               | 102 (51, 158)<br>4.6 (2.3, 7.1)                      | 596 (311, 881)<br>2.7 (1.4, 4)                                                             | 282 (160, 441)<br>2.3 (1.3, 3.6)    | 1919 (1499, 2325)<br>3.6 (2.8, 4.3)                  |                                     |                                                      |
|                                                                   |                                      |                                                                 |                                                                   | College                                                         | <i>N deaths</i><br><i>% CHD</i>              | 45 (24, 66)<br>9.6 (5.1, 14.2)                  | 17 (8, 25)<br>10.4 (5.2, 15.5)                | 225 (106, 333)<br>8.9 (4.2, 13.2)                 | 72 (38, 107)<br>7.8 (4.1, 11.6)                              | 843 (414, 1342)<br>8.9 (4.2, 13.2)              | 247 (114, 387)<br>6.5 (3, 10.2)                       | 1539 (708, 2315)<br>5.9 (2.7, 8.9)              | 466 (222, 707)<br>5.1 (2.4, 7.7)                            | 1599 (849, 2437)<br>4.8 (2.6, 7.4)             | 732 (391, 1113)<br>4.6 (2.5, 7.1)                    | 2726 (1569, 3905)<br>2.9 (1.7, 4.2)                                                        | 2495 (1326, 3700)<br>2.4 (1.3, 3.6) | 11020 (8818, 13011)<br>3.7 (2.9, 4.3)                |                                     |                                                      |
|                                                                   |                                      |                                                                 |                                                                   | Other                                                           | <i>N deaths</i><br><i>% CHD</i>              | 10 (4.9, 15)<br>8 (4, 13)                       | 6 (3, 9)<br>2 (1, 3)                          | 62 (29, 99)<br>33 (17, 49)                        | 21 (10, 34)<br>8 (4, 12)                                     | 163 (76, 249)<br>101 (53, 152)                  | 74 (35, 115)<br>29 (15, 44)                           | 287 (146, 421)<br>152 (79, 229)                 | 116 (55, 186)<br>59 (28, 91)                                | 236 (115, 364)<br>149 (77, 223)                | 130 (66, 204)<br>76 (39, 117)                        | 210 (119, 308)<br>208 (105, 304)                                                           | 330 (180, 483)<br>220 (119, 329)    | 1654 (1359, 1963)<br>1048 (852, 1251)                |                                     |                                                      |
|                                                                   |                                      |                                                                 |                                                                   | Hispanic                                                        | <i>N deaths</i><br><i>% CHD</i>              | 10.5 (5.1, 15.1)<br>5 (2, 7)                    | 9.5 (4.6, 14.2)<br>1 (0, 1)                   | 8.8 (4.6, 13.2)<br>18 (9, 29)                     | 7.4 (3.8, 11.7)<br>4 (2, 7)                                  | 7.5 (3.8, 11.6)<br>53 (26, 83)                  | 6.2 (3, 9.8)<br>8 (4, 14)                             | 6.2 (3, 9.8)<br>93 (43, 152)                    | 4.9 (2.4, 7.4)<br>17 (6, 33)                                | 5.6 (2.4, 7)<br>89 (45, 137)                   | 4.6 (2.4, 7)<br>49 (25, 74)                          | 4.6 (2.4, 7)<br>7.1 (3.6, 10.6)                                                            | 2.5 (1.4, 3.7)<br>3.4 (1.9, 5.1)    | 4 (3.3, 4.8)<br>4.9 (3.9, 5.8)                       |                                     |                                                      |
|                                                                   |                                      |                                                                 |                                                                   | Total                                                           | <i>N deaths</i><br><i>% CHD</i>              | 10.3 (5.1, 15.1)<br>9.9 (5.2, 14.7)             | 9.5 (4.6, 14.2)<br>9.8 (4.8, 14.4)            | 8.8 (4.6, 13.2)<br>8.9 (4.1, 13.6)                | 7.4 (3.8, 11.7)<br>7.9 (3.7, 12.2)                           | 7.5 (3.8, 11.6)<br>7.3 (3.7, 11.2)              | 6.2 (3, 9.8)<br>6.5 (3.1, 10.1)                       | 6.2 (3, 9.8)<br>6.1 (2.9, 9.1)                  | 4.9 (2.4, 7.4)<br>5.2 (2.6, 7.7)                            | 5.6 (2.4, 7)<br>5.1 (2.5, 7.7)                 | 4.6 (2.4, 7)<br>4.7 (2.3, 7)                         | 2.5 (1.4, 3.7)<br>3 (1.7, 4.3)                                                             | 3.5 (1.9, 5.2)<br>2.5 (1.4, 3.7)    | <b>14382 (11732, 17079)</b><br><b>3.9 (3.2, 4.6)</b> |                                     |                                                      |
|                                                                   |                                      |                                                                 |                                                                   | <b>PUFA replacing SFA<sup>e</sup></b><br>( <b>&lt;11% E/d</b> ) | <b>Cardiometabolic disease</b>               | <b>Overall by age</b>                           | <i>N deaths</i><br>100 (63, 140)              | 446 (252, 634)                                    | 1555 (947, 2220)                                             | 2795 (1624, 3889)                               | 3128 (1928, 4337)                                     | 6358 (4178, 8399)                               | <b>M: 9078 (6891, 11275)</b><br><b>F: 5293 (3776, 6946)</b> |                                                |                                                      |                                                                                            |                                     |                                                      |                                     |                                                      |
|                                                                   |                                      |                                                                 |                                                                   |                                                                 |                                              | <b>% CMD</b>                                    | 2.7 (1.7, 3.8)                                | 3.6 (2, 5.1)                                      | 3.7 (2.2, 5.2)                                               | 3.2 (1.9, 4.5)                                  | 2.7 (1.7, 3.8)                                        | 1.4 (0.9, 1.9)                                  | <b>M: 2.5 (1.9, 3.1)</b><br><b>F: 1.5 (1.1, 2)</b>          |                                                |                                                      |                                                                                            |                                     |                                                      |                                     |                                                      |
|                                                                   |                                      |                                                                 |                                                                   |                                                                 |                                              | <b>Education</b>                                | <i>N deaths</i><br><i>% CMD</i>               | 6 (3, 9)<br>3.7 (2, 5.5)                          | 73 (39, 109)<br>4.5 (2.4, 6.6)                               | 29 (15, 43)<br>3.6 (1.8, 5.3)                   | 222 (115, 365)<br>3.9 (2, 6.3)                        | 93 (45, 140)<br>3.5 (1.7, 5.3)                  | 368 (177, 560)<br>3.6 (1.7, 5.5)                            | 147 (71, 224)<br>2.9 (1.4, 4.4)                | 460 (234, 734)<br>3 (1.5, 4.8)                       | 264 (139, 402)<br>2.6 (1.4, 4)                                                             | 786 (426, 1102)<br>1.6 (0.9, 2.3)   | 931 (540, 1396)<br>1.3 (0.8, 2)                      | 3416 (2760, 4066)<br>2 (1.6, 2.4)   |                                                      |
|                                                                   |                                      |                                                                 |                                                                   |                                                                 |                                              | <High-school                                    | <i>N deaths</i><br><i>% CMD</i>               | 53 (26, 77)<br>3.3 (1.6, 4.8)                     | 16 (8, 24)<br>2 (1, 3)                                       | 232 (122, 347)<br>6.7 (3.4, 10.6)               | 67 (34, 106)<br>2.5 (1.3, 3.9)                        | 824 (411, 1265)<br>4 (2.1, 6)                   | 232 (111, 367)<br>2.6 (1.2, 4.1)                            | 1361 (703, 2043)<br>3.7 (1.9, 5.5)             | 428 (208, 644)<br>2.3 (1.1, 3.5)                     | 1375 (647, 2036)<br>3.3 (1.6, 4.9)                                                         | 626 (320, 944)<br>3.3 (1.7, 4.9)    | 1800 (1043, 2584)<br>2.1 (1.1, 3.3)                  | 1830 (1058, 2775)<br>1.2 (0.7, 1.8) | 8848 (7236, 10474)<br>2.1 (1.7, 2.5)                 |
|                                                                   |                                      |                                                                 |                                                                   |                                                                 |                                              | High-school                                     | <i>N deaths</i><br><i>% CMD</i>               | 7 (3, 10)<br>2.5 (1.2, 3.8)                       | 3 (2, 5)<br>1.9 (1, 2.9)                                     | 35 (16, 51)<br>3.7 (1.7, 5.4)                   | 9 (4, 14)<br>1.9 (0.9, 3)                             | 132 (66, 202)<br>3.7 (1.7, 5.4)                 | 33 (17, 51)<br>2.5 (1.3, 3.7)                               | 320 (157, 484)<br>3.5 (1.7, 4.8)               | 82 (42, 125)<br>2.3 (1.2, 3.5)                       | 317 (157, 485)<br>2.6 (1.3, 3.5)                                                           | 102 (51, 158)<br>1.9 (1, 3.1)       | 596 (311, 881)<br>1 (0.6, 1.6)                       | 282 (160, 441)<br>1.9 (1.5, 2.3)    | 1919 (1499, 2325)<br>1.9 (1.5, 2.3)                  |
|                                                                   |                                      |                                                                 |                                                                   |                                                                 |                                              | College                                         | <i>N deaths</i><br><i>% CHD</i>               | 45 (24, 66)<br>3.3 (1.8, 4.9)                     | 17 (8, 25)<br>2.5 (1.2, 3.7)                                 | 225 (106, 333)<br>4.5 (2.1, 6.7)                | 72 (38, 107)<br>3 (1.6, 4.5)                          | 843 (414, 1342)<br>4.4 (2.1, 6.9)               | 247 (114, 387)<br>3 (1.4, 4.8)                              | 1539 (708, 2315)<br>3.7 (1.7, 5.6)             | 466 (222, 707)<br>2.6 (1.2, 3.9)                     | 1599 (849, 2437)<br>3 (1.6, 4.5)                                                           | 732 (391, 1113)<br>2.3 (1.2, 3.5)   | 2726 (1569, 3905)<br>1.7 (1, 2.4)                    | 2495 (1326, 3700)<br>1.2 (0.6, 1.8) | 11020 (8818, 13011)<br>2 (1.6, 2.4)                  |
|                                                                   |                                      |                                                                 |                                                                   |                                                                 |                                              | Other                                           | <i>N deaths</i><br><i>% CHD</i>               | 10 (4.9, 15)<br>8 (4, 13)                         | 6 (3, 9)<br>2 (1, 3)                                         | 62 (29, 99)<br>33 (17, 49)                      | 21 (10, 34)<br>8 (4, 12)                              | 163 (76, 249)<br>101 (53, 152)                  | 74 (35, 115)<br>29 (15, 44)                                 | 287 (146, 421)<br>152 (79, 229)                | 116 (55, 186)<br>59 (28, 91)                         | 236 (115, 364)<br>149 (77, 223)                                                            | 130 (66, 204)<br>76 (39, 117)       | 210 (119, 308)<br>208 (105, 304)                     | 330 (180, 483)<br>220 (119, 329)    | 1654 (1359, 1963)<br>1048 (852, 1251)                |
|                                                                   |                                      |                                                                 |                                                                   |                                                                 |                                              | Hispanic                                        | <i>N deaths</i><br><i>% CHD</i>               | 10.5 (5.1, 15.1)<br>5 (2, 7)                      | 9.5 (4.6, 14.2)<br>1 (0, 1)                                  | 8.8 (4.6, 13.2)<br>18 (9, 29)                   | 7.4 (3.8, 11.7)<br>4 (2, 7)                           | 7.5 (3.8, 11.6)<br>53 (26, 83)                  | 6.2 (3, 9.8)<br>8 (4, 14)                                   | 6.2 (3, 9.8)<br>93 (43, 152)                   | 4.9 (2.4, 7.4)<br>17 (6, 33)                         | 5.6 (2.4, 7)<br>89 (45, 137)                                                               | 4.6 (2.4, 7)<br>49 (25, 74)         | 4.6 (2.4, 7)<br>7.1 (3.6, 10.6)                      | 2.5 (1.4, 3.7)<br>3.4 (1.9, 5.1)    | 4 (3.3, 4.8)<br>4.9 (3.9, 5.8)                       |
|                                                                   |                                      |                                                                 |                                                                   |                                                                 |                                              | Total                                           | <i>N deaths</i><br><i>% CHD</i>               | 10.3 (5.1, 15.1)<br>9.9 (5.2, 14.7)               | 9.5 (4.6, 14.2)<br>9.8 (4.8, 14.4)                           | 8.8 (4.6, 13.2)<br>8.9 (4.1, 13.6)              | 7.4 (3.8, 11.7)<br>7.9 (3.7, 12.2)                    | 7.5 (3.8, 11.6)<br>7.3 (3.7, 11.2)              | 6.2 (3, 9.8)<br>6.5 (3.1, 10.1)                             | 6.2 (3, 9.8)<br>6.1 (2.9, 9.1)                 | 4.9 (2.4, 7.4)<br>5.2 (2.6, 7.7)                     | 5.6 (2.4, 7)<br>5.1 (2.5, 7.7)                                                             | 4.6 (2.4, 7)<br>4.7 (2.3, 7)        | 2.5 (1.4, 3.7)<br>3 (1.7, 4.3)                       | 3.5 (1.9, 5.2)<br>2.5 (1.4, 3.7)    | <b>14382 (11732, 17079)</b><br><b>3.9 (3.2, 4.6)</b> |

**eTable 14. Absolute and proportional cardiometabolic disease mortality associated with suboptimal dietary habits in the US in 2012 by population subgroups (continued)**

| Dietary Factor <sup>a</sup>                         | Cardiometabolic Disease <sup>b</sup> | Population strata <sup>c</sup> | Associated mortality <sup>d</sup> | Age               |                   |                   |                   |                   |                   |                     |                   |                     |                   |                      |                          | Total (25+ y) (95% UIs)        |  |
|-----------------------------------------------------|--------------------------------------|--------------------------------|-----------------------------------|-------------------|-------------------|-------------------|-------------------|-------------------|-------------------|---------------------|-------------------|---------------------|-------------------|----------------------|--------------------------|--------------------------------|--|
|                                                     |                                      |                                |                                   | 25-34 y           |                   | 35-44 y           |                   | 45-54 y           |                   | 55-64 y             |                   | 65-74 y             |                   | 75+ y                |                          |                                |  |
|                                                     |                                      |                                |                                   | Males (95% UIs)   | Females (95% UIs) | Males (95% UIs)   | Females (95% UIs) | Males (95% UIs)   | Females (95% UIs) | Males (95% UIs)     | Females (95% UIs) | Males (95% UIs)     | Females (95% UIs) | Males (95% UIs)      | Females (95% UIs)        |                                |  |
| <b>Total</b>                                        | <i>N deaths</i>                      | <b>Total</b>                   | <i>N deaths</i>                   | 76 (40, 112)      | 26 (13, 38)       | 341 (159, 521)    | 106 (49, 164)     | 1195 (600, 1828)  | 363 (174, 558)    | 2113 (987, 3152)    | 680 (341, 1003)   | 2139 (1032, 3221)   | 992 (489, 1484)   | 3229 (1898, 4704)    | 3121 (1705, 4599)        | <b>14382 (11732, 17079)</b>    |  |
|                                                     | <i>% CMD</i>                         | <b>Total</b>                   | <i>% CMD</i>                      | 3.1 (1.7, 4.6)    | 2.1 (1, 3)        | 4 (1.9, 6.2)      | 2.6 (1.2, 4)      | 4.1 (2.1, 6.3)    | 2.7 (1.3, 4.2)    | 3.6 (1.7, 5.4)      | 2.4 (1.2, 3.6)    | 3 (1.5, 4.5)        | 2.2 (1.1, 3.4)    | 1.7 (1, 2.5)         | 1.2 (0.7, 1.8)           | <b>2 (1.7, 2.4)</b>            |  |
| <b>SFA replacing PUFA<sup>e</sup> (&gt;10% E/d)</b> | <b>Coronary heart disease</b>        | <b>Overall by age</b>          | <i>N deaths</i>                   | 16 (10, 26)       |                   | 125 (64, 194)     |                   | 526 (273, 792)    |                   | 882 (475, 1340)     |                   | 858 (516, 1275)     |                   | 1822 (1174, 2660)    |                          | <b>M: 2678 (1967, 3542)</b>    |  |
|                                                     |                                      |                                | <i>% CHD</i>                      | 1.6 (0.9, 2.6)    |                   | 2.4 (1.2, 3.7)    |                   | 2.4 (1.2, 3.6)    |                   | 1.8 (1, 2.8)        |                   | 1.4 (0.8, 2)        |                   | 0.8 (0.5, 1.1)       |                          | <b>F: 1571 (1045, 2198)</b>    |  |
|                                                     |                                      | <b>Education</b>               |                                   |                   |                   |                   |                   |                   |                   |                     |                   |                     |                   |                      |                          |                                |  |
|                                                     |                                      | <High-school                   | <i>N deaths</i>                   | 0 (0, 2)          | 1 (0, 2)          | 2 (0, 9)          | 0 (0, 0)          | 83 (30, 174)      | 17 (7, 30)        | 97 (40, 176)        | 44 (18, 86)       | 171 (71, 306)       | 54 (19, 115)      | 209 (102, 370)       | 205 (99, 344)            | 905 (685, 1159)                |  |
|                                                     |                                      |                                | <i>% CHD</i>                      | 0.2 (0, 1)        | 1.5 (0.7, 2.9)    | 0.3 (0, 1.2)      | 0 (0, 0.1)        | 2.6 (0.9, 5.4)    | 1.4 (0.6, 2.5)    | 1.6 (0.7, 2.9)      | 1.8 (0.7, 3.5)    | 1.9 (0.8, 3.4)      | 1.1 (0.4, 2.4)    | 0.8 (0.4, 1.4)       | 0.6 (0.3, 1)             | 1 (0.8, 1.3)                   |  |
|                                                     |                                      | High-school                    | <i>N deaths</i>                   | 9 (3, 18)         | 4 (2, 7)          | 73 (32, 128)      | 13 (6, 24)        | 291 (123, 517)    | 109 (49, 180)     | 540 (250, 938)      | 135 (62, 222)     | 396 (178, 699)      | 195 (79, 338)     | 409 (175, 817)       | 641 (318, 1050)          | 2903 (2234, 3616)              |  |
|                                                     |                                      |                                | <i>% CHD</i>                      | 1.8 (0.7, 3.6)    | 2.1 (1, 4)        | 2.8 (1.2, 4.8)    | 1.4 (0.6, 2.6)    | 2.7 (1.1, 4.7)    | 2.9 (1.3, 4.8)    | 2.4 (1.1, 4.2)      | 1.5 (0.7, 2.5)    | 1.6 (0.7, 2.8)      | 1.4 (0.6, 2.5)    | 0.7 (0.3, 1.4)       | 0.9 (0.4, 1.4)           | 1.3 (1, 1.6)                   |  |
|                                                     |                                      | College                        | <i>N deaths</i>                   | 1 (0, 3)          | 1 (0, 1)          | 17 (8, 28)        | 2 (1, 5)          | 33 (11, 69)       | 7 (0, 20)         | 87 (38, 149)        | 9 (2, 28)         | 42 (12, 109)        | 23 (10, 42)       | 97 (37, 198)         | 586 (407, 796)           |                                |  |
|                                                     |                                      |                                | <i>% CHD</i>                      | 1.6 (0.6, 3.4)    | 1.7 (0.7, 3.5)    | 4 (1.8, 6.7)      | 2 (0.8, 4)        | 1.8 (0.6, 3.7)    | 1.4 (0, 4)        | 1.6 (0.7, 2.7)      | 0.5 (0.1, 1.7)    | 0.6 (0.2, 1.5)      | 1.9 (0.6, 3.8)    | 1.1 (0.5, 1.9)       | 0.8 (0.3, 1.6)           | 1.1 (0.8, 1.5)                 |  |
|                                                     |                                      | <b>Race</b>                    |                                   |                   |                   |                   |                   |                   |                   |                     |                   |                     |                   |                      |                          |                                |  |
|                                                     |                                      | White                          | <i>N deaths</i>                   | 11 (5, 20)        | 4 (2, 7)          | 88 (41, 144)      | 14 (5, 27)        | 410 (194, 680)    | 107 (46, 180)     | 628 (285, 1047)     | 142 (60, 248)     | 549 (250, 920)      | 284 (140, 479)    | 844 (424, 1509)      | 929 (473, 1470)          | 4022 (3166, 4990)              |  |
|                                                     |                                      |                                | <i>% CHD</i>                      | 2.3 (1, 4.4)      | 2.4 (1.1, 4.3)    | 3.5 (1.6, 5.7)    | 1.5 (0.6, 2.9)    | 3.4 (1.6, 5.7)    | 2.8 (1.2, 4.7)    | 2.4 (1.1, 4)        | 1.6 (0.7, 2.7)    | 1.7 (0.8, 2.8)      | 1.8 (0.9, 3)      | 0.9 (0.5, 1.6)       | 0.9 (0.5, 1.4)           | 1.3 (1.1, 1.7)                 |  |
|                                                     |                                      | Black                          | <i>N deaths</i>                   | 2 (1, 5)          | 1 (0, 2)          | 8 (3, 17)         | 4 (2, 9)          | 41 (17, 74)       | 4 (2, 9)          | 67 (30, 124)        | 32 (14, 60)       | 96 (47, 157)        | 68 (33, 115)      | 29 (12, 55)          | 427 (316, 560)           |                                |  |
|                                                     |                                      |                                | <i>% CHD</i>                      | 1.2 (0.4, 3)      | 1.7 (0.7, 3.2)    | 1.1 (0.4, 2.2)    | 1.5 (0.5, 3.1)    | 1.6 (0.7, 2.9)    | 0.9 (0.3, 2.4)    | 1.3 (0.6, 2.4)      | 1.2 (0.5, 2.2)    | 2 (1, 3.2)          | 2.1 (1, 3.5)      | 0.8 (0, 2)           | 0.3 (0.1, 0.5)           | 1.1 (0.8, 1.4)                 |  |
|                                                     |                                      | Hispanic                       | <i>N deaths</i>                   | 0 (0, 1)          | 0 (0, 0)          | 5 (0, 13)         | 1 (0, 2)          | 3 (0, 14)         | 4 (1, 9)          | 21 (8, 44)          | 3 (1, 6)          | 7 (0, 35)           | 3 (1, 8)          | 3 (0, 18)            | 26 (6, 87)               | 85 (50, 151)                   |  |
|                                                     |                                      |                                | <i>% CHD</i>                      | 0 (0, 1.1)        | 0.7 (0, 2.5)      | 1.4 (0.1, 3.8)    | 0.8 (0.3, 2)      | 0.3 (0, 1.1)      | 1.1 (0.4, 2.6)    | 0.9 (0.4, 2)        | 0.3 (0.1, 0.7)    | 0.3 (0, 1.4)        | 0.2 (0.1, 0.6)    | 0.1 (0, 0.3)         | 0.4 (0.1, 1.4)           | 0.4 (0.2, 0.7)                 |  |
|                                                     |                                      | Other                          | <i>N deaths</i>                   | 0 (0, 1)          | 0 (0, 0)          | 0 (0, 1)          | 0 (0, 1)          | 1 (0, 3)          | 1 (0, 3)          | 0 (0, 6)            | 0 (0, 2)          | 9 (2, 29)           | 0 (0, 6)          | 8 (3, 18)            | 8 (2, 28)                | 32 (17, 59)                    |  |
|                                                     |                                      | <i>% CHD</i>                   | 0.5 (0.1, 1.4)                    | 0.6 (0.2, 1.8)    | 0.1 (0, 0.7)      | 0.2 (0, 1.6)      | 0.1 (0, 0.4)      | 0.1 (0, 1.8)      | 0 (0, 0.5)        | 0.1 (0, 0.4)        | 0.6 (0.2, 2.1)    | 0 (0, 0.9)          | 0.2 (0.1, 0.6)    | 0.3 (0.1, 0.8)       | 0.3 (0.2, 0.5)           |                                |  |
|                                                     | <b>Total</b>                         | <i>N deaths</i>                | 12 (5, 21)                        | 5 (2, 8)          | 105 (48, 171)     | 18 (8, 31)        | 401 (179, 677)    | 118 (51, 208)     | 706 (333, 1173)   | 172 (81, 290)       | 549 (257, 941)    | 306 (132, 502)      | 878 (464, 1452)   | 930 (481, 1496)      | <b>4244 (3366, 5278)</b> |                                |  |
|                                                     |                                      | <i>% CHD</i>                   | 1.5 (0.7, 2.8)                    | 1.8 (0.9, 3.1)    | 2.7 (1.3, 4.5)    | 1.3 (0.6, 2.3)    | 2.4 (1.1, 4.1)    | 2.1 (0.9, 3.8)    | 2 (1, 3.4)        | 1.3 (0.6, 2.2)      | 1.3 (0.6, 2.3)    | 1.5 (0.6, 2.4)      | 0.8 (0.4, 1.3)    | 0.8 (0.4, 1.2)       | <b>1.1 (0.9, 1.4)</b>    |                                |  |
| <b>SFA replacing PUFA<sup>e</sup> (&gt;10% E/d)</b> | <b>Cardiometabolic disease</b>       | <b>Overall by age</b>          | <i>N deaths</i>                   | 16 (10, 26)       |                   | 125 (64, 194)     |                   | 526 (273, 792)    |                   | 882 (475, 1340)     |                   | 858 (516, 1275)     |                   | 1822 (1174, 2660)    |                          | <b>M: 2678 (1967, 3542)</b>    |  |
|                                                     |                                      |                                | <i>% CMD</i>                      | 0.4 (0.3, 0.7)    |                   | 1 (0.5, 1.5)      |                   | 1.2 (0.6, 1.9)    |                   | 1 (0.6, 1.6)        |                   | 0.7 (0.4, 1.1)      |                   | 0.4 (0.3, 0.6)       |                          | <b>F: 1571 (1045, 2198)</b>    |  |
|                                                     |                                      | <b>Education</b>               |                                   |                   |                   |                   |                   |                   |                   |                     |                   |                     |                   |                      |                          |                                |  |
|                                                     |                                      | <High-school                   | <i>N deaths</i>                   | 0 (0, 2)          | 1 (0, 2)          | 2 (0, 9)          | 0 (0, 0)          | 83 (30, 174)      | 17 (7, 30)        | 97 (40, 176)        | 44 (18, 86)       | 171 (71, 306)       | 54 (19, 115)      | 209 (102, 370)       | 205 (99, 344)            | 905 (685, 1159)                |  |
|                                                     |                                      |                                | <i>% CMD</i>                      | 0.1 (0, 0.3)      | 0.3 (0.2, 0.6)    | 0.1 (0, 0.5)      | 0 (0, 0)          | 1.4 (0.5, 3)      | 0.6 (0.3, 1.1)    | 0.9 (0.4, 1.7)      | 0.8 (0.3, 1.7)    | 1.1 (0.5, 2)        | 0.5 (0.2, 1.2)    | 0.4 (0.2, 0.8)       | 0.3 (0.1, 0.5)           | 0.5 (0.4, 0.7)                 |  |
|                                                     |                                      | High-school                    | <i>N deaths</i>                   | 9 (3, 18)         | 4 (2, 7)          | 73 (32, 128)      | 13 (6, 24)        | 291 (123, 517)    | 109 (49, 180)     | 540 (250, 938)      | 135 (62, 222)     | 396 (178, 699)      | 195 (79, 338)     | 409 (175, 817)       | 641 (318, 1050)          | 2903 (2234, 3616)              |  |
|                                                     |                                      |                                | <i>% CMD</i>                      | 0.6 (0.2, 1.1)    | 0.5 (0.2, 0.8)    | 1.3 (0.6, 2.2)    | 0.5 (0.2, 0.9)    | 1.5 (0.6, 2.7)    | 1.2 (0.5, 2)      | 1.5 (0.7, 2.5)      | 0.7 (0.3, 1.2)    | 1 (0.4, 1.7)        | 0.7 (0.3, 1.2)    | 0.4 (0.2, 0.8)       | 0.7 (0.5, 0.9)           | 1.1 (0.8, 1.4)                 |  |
|                                                     |                                      | College                        | <i>N deaths</i>                   | 1 (0, 3)          | 1 (0, 1)          | 17 (8, 28)        | 2 (1, 5)          | 33 (11, 69)       | 7 (0, 20)         | 87 (38, 149)        | 9 (2, 28)         | 42 (12, 109)        | 23 (10, 42)       | 97 (37, 198)         | 586 (407, 796)           |                                |  |
|                                                     |                                      |                                | <i>% CMD</i>                      | 0.5 (0.2, 1)      | 0.4 (0.1, 0.7)    | 1.8 (0.8, 3)      | 0.5 (0.2, 1)      | 1 (0.3, 2.1)      | 0.5 (0.2, 1.4)    | 1 (0.4, 1.6)        | 0.2 (0.1, 0.8)    | 0.4 (0.1, 0.9)      | 0.8 (0.3, 1.7)    | 0.6 (0.3, 1.1)       | 0.4 (0.4, 0.8)           | 1.1 (0.8, 1.5)                 |  |
|                                                     |                                      | <b>Race</b>                    |                                   |                   |                   |                   |                   |                   |                   |                     |                   |                     |                   |                      |                          |                                |  |
|                                                     |                                      | White                          | <i>N deaths</i>                   | 11 (5, 20)        | 4 (2, 7)          | 88 (41, 144)      | 14 (5, 27)        | 410 (194, 680)    | 107 (46, 180)     | 628 (285, 1047)     | 142 (60, 248)     | 549 (250, 920)      | 284 (140, 479)    | 844 (424, 1509)      | 929 (473, 1470)          | 4051 (3155, 5138)              |  |
|                                                     |                                      |                                | <i>% CHD</i>                      | 0.8 (0.3, 1.5)    | 0.6 (0.3, 1)      | 1.8 (0.8, 2.9)    | 0.6 (0.2, 1.1)    | 2.1 (1, 3.5)      | 1.3 (0.6, 2.2)    | 1.5 (0.7, 2.5)      | 0.8 (0.3, 1.4)    | 1 (0.5, 1.7)        | 0.9 (0.4, 1.5)    | 0.5 (0.3, 0.9)       | 0.4 (0.2, 0.7)           | 0.7 (0.6, 0.9)                 |  |
|                                                     |                                      | Black                          | <i>N deaths</i>                   | 2 (1, 5)          | 1 (0, 2)          | 8 (3, 17)         | 4 (2, 9)          | 41 (17, 74)       | 4 (2, 9)          | 67 (30, 124)        | 32 (14, 60)       | 96 (47, 157)        | 68 (33, 115)      | 29 (12, 55)          | 427 (316, 560)           |                                |  |
|                                                     |                                      |                                | <i>% CHD</i>                      | 0.3 (0.1, 0.8)    | 0.3 (0.1, 0.6)    | 0.4 (0.2, 0.8)    | 0.4 (0.1, 0.8)    | 0.7 (0.3, 1.3)    | 0.4 (0.1, 0.8)    | 0.6 (0.3, 1.2)      | 0.5 (0.2, 0.9)    | 1 (0.5, 1.6)        | 0.9 (0.4, 1.5)    | 0.1 (0.1, 0.2)       | 0.1 (0.1, 0.2)           | 0.5 (0.4, 0.7)                 |  |
|                                                     |                                      | Hispanic                       | <i>N deaths</i>                   | 0 (0, 1)          | 0 (0, 0)          | 5 (0, 13)         | 1 (0, 2)          | 3 (0, 14)         | 4 (1, 9)          | 21 (8, 44)          | 3 (1, 6)          | 7 (0, 35)           | 3 (1, 8)          | 3 (0, 18)            | 26 (6, 87)               | 86 (48, 149)                   |  |
|                                                     |                                      |                                | <i>% CHD</i>                      | 0 (0, 0.3)        | 0.1 (0, 0.4)      | 0.5 (0, 1.3)      | 0.2 (0.1, 0.5)    | 0.1 (0, 0.5)      | 0.4 (0.1, 0.9)    | 0.5 (0.2, 1)        | 0.1 (0, 0.3)      | 0.1 (0, 0.5)        | 0.1 (0, 0.2)      | 0 (0, 0.2)           | 0.2 (0.1, 0.4)           | 0.2 (0.1, 0.4)                 |  |
|                                                     |                                      | Other                          | <i>N deaths</i>                   | 0 (0, 1)          | 0 (0, 0)          | 0 (0, 1)          | 0 (0, 1)          | 1 (0, 3)          | 1 (0, 3)          | 0 (0, 6)            | 0 (0, 2)          | 9 (2, 29)           | 0 (0, 6)          | 8 (3, 18)            | 8 (2, 28)                | 33 (18, 59)                    |  |
|                                                     |                                      | <i>% CHD</i>                   | 0.2 (0, 0.5)                      | 0.1 (0, 0.2)      | 0.1 (0, 0.3)      | 0.1 (0, 0.4)      | 0 (0, 0.2)        | 0.1 (0, 0.6)      | 0 (0, 0.3)        | 0 (0, 0.2)          | 0.3 (0.1, 1.2)    | 0 (0, 0.4)          | 0.1 (0.1, 0.3)    | 0.1 (0, 0.4)         | 0.1 (0.1, 0.3)           |                                |  |
|                                                     | <b>Total</b>                         | <i>N deaths</i>                | 12 (5, 21)                        | 5 (2, 8)          | 105 (48, 171)     | 18 (8, 31)        | 401 (179, 677)    | 118 (51, 208)     | 706 (333, 1173)   | 172 (81, 290)       | 549 (257, 941)    | 306 (132, 502)      | 878 (464, 1452)   | 930 (481, 1496)      | <b>4244 (3366, 5278)</b> |                                |  |
|                                                     |                                      | <i>% CMD</i>                   | 0.5 (0.2, 0.9)                    | 0.4 (0.2, 0.6)    | 1.2 (0.6, 2)      | 0.4 (0.2, 0.8)    | 1.4 (0.6, 2.3)    | 0.9 (0.4, 1.6)    | 1.2 (0.6, 2)      | 0.6 (0.3, 1)        | 0.8 (0.4, 1.3)    | 0.7 (0.3, 1.1)      | 0.5 (0.2, 0.8)    | 0.4 (0.2, 0.6)       | <b>0.6 (0.5, 0.8)</b>    |                                |  |
| <b>Seafood ω-3 fats (&lt;250 m/d)</b>               | <b>Coronary heart disease</b>        | <b>Overall by age</b>          | <i>N deaths</i>                   | 310 (199, 407)    |                   | 1506 (962, 1958)  |                   | 5641 (3863, 7392) |                   | 10167 (6770, 13557) |                   | 10397 (6692, 14141) |                   | 26560 (19177, 34558) |                          | <b>M: 31545 (24388, 38996)</b> |  |
|                                                     |                                      |                                | <i>% CHD</i>                      | 30.3 (19.4, 39.7) |                   | 29.1 (18.6, 37.8) |                   | 25.7 (17.6, 33.7) |                   | 21.3 (14.2, 28.4)   |                   | 16.6 (10.7, 22.5)   |                   | 11.4 (8.2, 14.9)     |                          | <b>F: 23033 (16109, 29618)</b> |  |
|                                                     |                                      | <b>Education</b>               |                                   |                   |                   |                   |                   |                   |                   |                     |                   |                     |                   |                      |                          |                                |  |
|                                                     |                                      | <High-school                   | <i>N deaths</i>                   | 50 (26, 76)       | 19 (10, 27)       | 189 (95, 290)     | 97 (55, 134)      | 748 (381, 1182)   | 328 (184, 442)    | 1339 (649, 2053)    | 578 (316, 862)    | 1537 (690, 2583)    | 943 (509, 1397)   | 2680 (1486, 4126)    | 4505 (2601, 6452)        | 13125 (10691, 15701)           |  |
|                                                     |                                      |                                | <i>% CHD</i>                      | 29.7 (15.4, 44.9) | 33.7 (17.4, 47.9) | 25.8 (12.9, 39.5) | 33 (18.9, 45.8)   | 23.4 (11.9, 37)   | 27.6 (15.5, 37.3) | 22.3 (10.8, 34.3)   | 23.7 (13, 35.4)   | 17.3 (7.8, 29.1)    | 19.6 (10.6, 29.1) | 9.8 (5.4, 15.1)      | 13.1 (7.6, 18.7)         | 14.7 (11.9, 17.5)              |  |
|                                                     |                                      | High-school                    | <i>N deaths</i>                   | 155 (88, 223)     | 59 (35, 80)       | 762 (406, 1093)   | 268 (145, 380)    | 3005 (1611, 4204) | 1043 (611, 1433)  | 4692 (2536, 7103)   | 2000 (1106, 2831) | 3921 (1843, 6680)   | 2241 (1258, 3346) | 7144 (4197, 9879)    | 9631 (5841, 13310)       | 34926 (28686, 41325)           |  |
|                                                     |                                      |                                | <i>% CHD</i>                      | 30.2 (17.1, 43.5) | 34.7 (20.7, 47.1) | 28.9 (15.4, 41.5) | 29.6 (16.1, 42)   | 27.5 (14.7, 38.5) | 21.2 (11.5, 32.2) | 22.9 (12.6, 32.4)   | 16.5 (9.3, 24.7)  | 16 (7.5, 27.2)      | 15.5 (9.3, 24.7)  | 13 (7.9, 18)         | 15.9 (13.1, 18.8)        | 15.9 (13.1, 18.8)              |  |
|                                                     |                                      | College                        | <i>N deaths</i>                   | 20 (11, 29)       | 9 (5, 13)         | 127 (73, 178)     | 37 (20, 52)       | 425 (228, 676)    | 105 (54, 167)     | 1119 (571, 1591)    | 327 (165, 497)    | 1099 (583, 1700)    | 369 (194, 582)    | 2156 (1184, 3440)    | 627 (122, 1433)          | 6440 (4954, 8047)              |  |
|                                                     |                                      |                                | <i>% CHD</i>                      | 26.7 (14.4, 38.4) | 28.3 (15.8, 40.5) | 30.3 (17.5, 42.5) | 30.4 (16.4, 42.7) | 22.8 (12.3, 36.2) | 21.3 (10.9, 33.8) | 20.5 (10.5, 29.2)   | 20.3 (10.3, 31)   | 15.6 (8.3, 24.1)    | 16.5 (8.7, 26.1)  | 16.5 (8.7, 26.1)     | 5 (1, 11.5)              | 12 (9.2, 15)                   |  |
|                                                     |                                      | <b>Race</b>                    |                                   |                   |                   |                   |                   |                   |                   |                     |                   |                     |                   |                      |                          |                                |  |
|                                                     |                                      | White                          | <i>N deaths</i>                   | 151 (83, 210)     | 55 (33, 76)       | 826 (445, 1148)   | 293 (163, 405)    | 3183 (1758, 4494) | 999 (557, 1445)   | 5502 (2901, 8128)   | 2137 (1092, 307   |                     |                   |                      |                          |                                |  |

**eTable 14. Absolute and proportional cardiometabolic disease mortality associated with suboptimal dietary habits in the US in 2012 by population subgroups (continued)**

| Dietary Factor <sup>a</sup>                      | Cardiometabolic Disease <sup>b</sup> | Population strata <sup>c</sup> | Associated mortality <sup>d</sup> | Age                |                      |                    |                      |                    |                      |                     |                      |                     |                      |                      |                      | Total (25+ y)<br>(95% UIs)                                                                                                |                                                                                                                           |                                                                                                                           |
|--------------------------------------------------|--------------------------------------|--------------------------------|-----------------------------------|--------------------|----------------------|--------------------|----------------------|--------------------|----------------------|---------------------|----------------------|---------------------|----------------------|----------------------|----------------------|---------------------------------------------------------------------------------------------------------------------------|---------------------------------------------------------------------------------------------------------------------------|---------------------------------------------------------------------------------------------------------------------------|
|                                                  |                                      |                                |                                   | 25-34 y            |                      | 35-44 y            |                      | 45-54 y            |                      | 55-64 y             |                      | 65-74 y             |                      | 75+ y                |                      |                                                                                                                           |                                                                                                                           |                                                                                                                           |
|                                                  |                                      |                                |                                   | Males<br>(95% UIs) | Females<br>(95% UIs) | Males<br>(95% UIs) | Females<br>(95% UIs) | Males<br>(95% UIs) | Females<br>(95% UIs) | Males<br>(95% UIs)  | Females<br>(95% UIs) | Males<br>(95% UIs)  | Females<br>(95% UIs) | Males<br>(95% UIs)   | Females<br>(95% UIs) |                                                                                                                           |                                                                                                                           |                                                                                                                           |
| <b>Seafood ω-3 fats</b><br><b>(&lt;250 mg/d)</b> | <b>Cardiometabolic disease</b>       | <b>Overall by age</b>          | % <i>CHD</i>                      | 29.5 (16.2, 41.2)  | 31.8 (17.7, 43.8)    | 28.8 (15.7, 39.1)  | 30.4 (17.8, 42.8)    | 25.8 (15.1, 36.1)  | 25.7 (14.4, 36.6)    | 21 (11.9, 30.5)     | 22.6 (12.3, 32)      | 16.1 (8.5, 24.3)    | 17.2 (9.3, 25.2)     | 10.9 (6.5, 15.6)     | 11.8 (6.8, 16.7)     | <b>14.7 (12.3, 17.5)</b>                                                                                                  |                                                                                                                           |                                                                                                                           |
|                                                  |                                      | <i>N deaths</i>                |                                   | 310 (199, 407)     |                      | 1506 (962, 1958)   |                      | 5641 (3863, 7392)  |                      | 10167 (6770, 13557) |                      | 10397 (6692, 14141) |                      | 26560 (19177, 34558) |                      |                                                                                                                           | <b>M: 31545 (24388, 38996)</b><br><b>F: 23033 (16109, 29618)</b><br><b>M: 8.8 (6.8, 10.9)</b><br><b>F: 6.7 (4.7, 8.6)</b> |                                                                                                                           |
|                                                  |                                      |                                |                                   | % <i>CMD</i>       | 8.5 (5.4, 11.1)      |                    | 12 (7.7, 15.6)       |                    | 13.3 (9.1, 17.5)     |                     | 11.8 (7.9, 15.7)     |                     | 9 (5.8, 12.3)        |                      | 6 (4.3, 7.8)         |                                                                                                                           |                                                                                                                           |                                                                                                                           |
|                                                  |                                      |                                | <b>Education</b>                  |                    |                      |                    |                      |                    |                      |                     |                      |                     |                      |                      |                      |                                                                                                                           |                                                                                                                           |                                                                                                                           |
|                                                  |                                      |                                | <High-school                      | <i>N deaths</i>    | 50 (26, 76)          | 19 (10, 27)        | 189 (95, 290)        | 97 (55, 134)       | 748 (381, 1182)      | 328 (184, 442)      | 1339 (649, 2053)     | 578 (316, 862)      | 1537 (690, 2583)     | 943 (509, 1397)      | 2680 (1486, 4126)    | 4505 (2601, 6452)                                                                                                         | 13125 (10691, 15701)                                                                                                      |                                                                                                                           |
|                                                  |                                      |                                |                                   | % <i>CHD</i>       | 9.6 (5, 14.5)        | 7.6 (4, 10.9)      | 11.5 (5.8, 17.5)     | 11.9 (6.8, 16.5)   | 13.1 (6.6, 20.5)     | 12.4 (7, 16.8)      | 13.1 (6.4, 20.1)     | 11.2 (6.2, 16.8)    | 10 (4.5, 16.8)       | 9.5 (5.1, 14)        | 5.6 (3.1, 8.6)       | 6.5 (3.7, 9.3)                                                                                                            | 7.7 (6.3, 9.3)                                                                                                            |                                                                                                                           |
|                                                  |                                      |                                |                                   | <i>N deaths</i>    | 155 (88, 223)        | 59 (35, 80)        | 762 (406, 1093)      | 268 (145, 380)     | 3005 (1611, 4204)    | 1043 (611, 1433)    | 4692 (2536, 7103)    | 2000 (1106, 2831)   | 3921 (1843, 6680)    | 2241 (1258, 3346)    | 7144 (4197, 9879)    | 34926 (28686, 41325)                                                                                                      | 9631 (5841, 13310)                                                                                                        |                                                                                                                           |
|                                                  |                                      |                                | High-school                       | % <i>CMD</i>       | 9.7 (5.5, 13.9)      | 7.3 (4.3, 9.9)     | 13.3 (7.1, 19)       | 9.9 (5.4, 14)      | 15.6 (8.4, 21.9)     | 11.5 (6.8, 15.8)    | 12.6 (6.8, 19.1)     | 10.8 (6, 15.3)      | 9.5 (4.4, 16.1)      | 7.9 (4.4, 11.8)      | 7.2 (4.2, 10)        | 6.3 (3.8, 8.8)                                                                                                            | 8.4 (6.9, 9.9)                                                                                                            |                                                                                                                           |
|                                                  |                                      |                                |                                   | <i>N deaths</i>    | 20 (11, 29)          | 9 (5, 13)          | 127 (73, 178)        | 37 (20, 52)        | 425 (228, 676)       | 105 (54, 167)       | 1119 (571, 1591)     | 327 (165, 497)      | 1099 (583, 1700)     | 369 (194, 582)       | 2156 (1184, 3440)    | 627 (122, 1433)                                                                                                           | 6440 (4954, 8047)                                                                                                         |                                                                                                                           |
|                                                  |                                      |                                |                                   | % <i>CHD</i>       | 7.7 (4.1, 11)        | 5.7 (3.2, 8.2)     | 13.5 (7.8, 18.9)     | 7.7 (4.1, 10.8)    | 13 (7, 20.6)         | 7.7 (4, 12.3)       | 12.3 (6.3, 17.5)     | 9.1 (4.6, 13.8)     | 9.1 (4.8, 14.1)      | 7.3 (3.8, 11.5)      | 5.6 (3.1, 8.9)       | 2.3 (0.5, 5.3)                                                                                                            | 6.3 (4.9, 7.9)                                                                                                            |                                                                                                                           |
|                                                  |                                      |                                | College                           | <i>N deaths</i>    | 151 (83, 210)        | 55 (33, 76)        | 826 (445, 1148)      | 293 (163, 405)     | 3183 (1758, 4494)    | 999 (557, 1445)     | 5502 (2901, 8128)    | 2137 (1092, 3073)   | 5692 (2949, 8557)    | 2843 (1540, 4052)    | 10491 (6368, 14834)  | 12533 (7046, 17680)                                                                                                       | 44430 (36918, 52429)                                                                                                      |                                                                                                                           |
|                                                  |                                      |                                |                                   | % <i>CHD</i>       | 11.3 (6.1, 15.6)     | 8.2 (4.9, 11.2)    | 16.7 (9, 23.2)       | 12.3 (6.9, 17)     | 16.5 (9.1, 23.2)     | 12.3 (6.8, 17.8)    | 13.2 (7, 19.5)       | 11.8 (6, 16.9)      | 10.5 (5.4, 15.8)     | 9.8 (4.8, 12.7)      | 6.6 (4, 9.3)         | 6 (3.3, 8.4)                                                                                                              | 8 (6.7, 9.5)                                                                                                              |                                                                                                                           |
|                                                  |                                      |                                |                                   | <i>N deaths</i>    | 53 (30, 77)          | 22 (13, 32)        | 220 (120, 312)       | 75 (40, 111)       | 606 (302, 926)       | 271 (159, 405)      | 1039 (519, 1511)     | 550 (314, 828)      | 703 (354, 1184)      | 505 (259, 791)       | 1744 (1016, 2472)    | 5985 (4399, 7571)                                                                                                         | 5985 (4399, 7571)                                                                                                         |                                                                                                                           |
|                                                  |                                      |                                | Black                             | % <i>CMD</i>       | 8.7 (4.9, 12.6)      | 6.2 (3.5, 8.8)     | 10.7 (5.8, 15.1)     | 6.5 (3.5, 9.6)     | 10.3 (5.1, 15.7)     | 7.4 (4.3, 11.1)     | 10 (5, 14.6)         | 8.5 (4.8, 12.8)     | 7.2 (3.6, 12.2)      | 6.7 (3.4, 10.4)      | 5.5 (3.2, 8.5)       | 4.9 (2.5, 7.9)                                                                                                            | 7.1 (5.8, 8.5)                                                                                                            |                                                                                                                           |
|                                                  |                                      |                                |                                   | <i>N deaths</i>    | 22 (11, 34)          | 6 (4, 9)           | 81 (41, 132)         | 30 (17, 41)        | 306 (150, 440)       | 100 (57, 139)       | 522 (270, 733)       | 209 (117, 294)      | 508 (276, 703)       | 263 (140, 374)       | 598 (0, 1082)        | 652 (339, 1000)                                                                                                           | 3299 (2530, 3998)                                                                                                         |                                                                                                                           |
|                                                  |                                      |                                |                                   | % <i>CHD</i>       | 6.8 (3.4, 10.5)      | 4.6 (2.7, 6.5)     | 8.1 (4.1, 13.2)      | 8 (4.6, 10.9)      | 12.2 (6, 17.6)       | 9.4 (5.4, 13.2)     | 12.4 (6.4, 17.5)     | 10 (5.6, 14)        | 11.1 (6, 15.4)       | 8.5 (4.6, 12.4)      | 6.1 (0, 11.1)        | 5.1 (2.6, 7.8)                                                                                                            | 7.9 (6.6, 9)                                                                                                              |                                                                                                                           |
|                                                  |                                      |                                | Hispanic                          | <i>N deaths</i>    | 6 (0, 18)            | 2 (0, 3)           | 36 (10, 76)          | 10 (5, 16)         | 132 (54, 241)        | 27 (12, 45)         | 256 (127, 410)       | 63 (25, 113)        | 125 (31, 280)        | 86 (0, 214)          | 237 (47, 558)        | 264 (75, 547)                                                                                                             | 1284 (909, 1756)                                                                                                          |                                                                                                                           |
|                                                  |                                      |                                |                                   | % <i>CHD</i>       | 4.4 (0.2, 13.6)      | 2.2 (0.7, 4.2)     | 7.9 (2.2, 16.7)      | 6 (2.9, 9.5)       | 10.7 (4.3, 19.5)     | 5.8 (2.4, 9.4)      | 11.8 (5.9, 19)       | 5.9 (2.3, 10.5)     | 4.9 (1.2, 11.1)      | 5.1 (0, 12.7)        | 4.2 (0.8, 9.8)       | 3.8 (1.1, 7.8)                                                                                                            | 5.7 (4.7, 7)                                                                                                              |                                                                                                                           |
|                                                  |                                      |                                | Other                             | <i>N deaths</i>    | 225 (123, 315)       | 83 (46, 115)       | 1107 (604, 1503)     | 408 (239, 574)     | 4216 (2470, 5901)    | 1428 (798, 2029)    | 7279 (4132, 10571)   | 2955 (1617, 4197)   | 6473 (3566, 10158)   | 3529 (1961, 5307)    | 11868 (7153, 17013)  | 14582 (8335, 20583)                                                                                                       | 54626 (45541, 65053)                                                                                                      |                                                                                                                           |
|                                                  |                                      |                                |                                   | % <i>CMD</i>       | 9.3 (5.1, 13)        | 6.7 (3.7, 9.2)     | 13.1 (7.1, 17.7)     | 10 (5.9, 14.1)     | 14.5 (8.5, 20.4)     | 10.7 (6, 15.2)      | 12.5 (7.1, 18.1)     | 10.6 (5.8, 15.1)    | 9.5 (5, 14.3)        | 8.2 (4.4, 12)        | 6.3 (3.8, 9)         | 5.8 (3.3, 8.1)                                                                                                            | 7.8 (6.5, 9.3)                                                                                                            |                                                                                                                           |
|                                                  |                                      |                                | <b>Total</b>                      | <i>N deaths</i>    | 125 (63, 201)        |                    | 729 (479, 1052)      |                    | 4229 (3199, 5429)    |                     | 8690 (6802, 10848)   |                     | 11963 (9897, 14222)  |                      | 26797 (19566, 34261) |                                                                                                                           |                                                                                                                           | <b>M: 29660 (24076, 36052)</b><br><b>F: 22528 (17523, 29157)</b><br><b>M: 11 (8.9, 13.3)</b><br><b>F: 9.6 (7.4, 12.4)</b> |
|                                                  |                                      |                                |                                   | % <i>CHD</i>       | 5 (2.5, 8)           |                    | 8 (5.3, 11.6)        |                    | 13.5 (10.2, 17.4)    |                     | 13.7 (10.7, 17.1)    |                     | 14.6 (12.1, 17.4)    |                      | 8.4 (6.2, 10.8)      |                                                                                                                           |                                                                                                                           |                                                                                                                           |
|                                                  | <b>Education</b>                     |                                |                                   |                    |                      |                    |                      |                    |                      |                     |                      |                     |                      |                      |                      |                                                                                                                           |                                                                                                                           |                                                                                                                           |
|                                                  | <High-school                         | <i>N deaths</i>                | 23 (12, 38)                       | 0 (0, 0)           | 220 (148, 302)       | 94 (68, 126)       | 246 (78, 441)        | 97 (36, 171)       | 1125 (794, 1498)     | 508 (359, 680)      | 464 (141, 810)       | 247 (70, 432)       | 3095 (1942, 4520)    | 3382 (2318, 4927)    | 9573 (7836, 11690)   |                                                                                                                           |                                                                                                                           |                                                                                                                           |
|                                                  |                                      | % <i>CHD</i>                   | 6.1 (3, 9.9)                      | 0 (0, 0)           | 18.5 (12.5, 25.4)    | 18.1 (13.1, 24.3)  | 5.6 (2.1, 9.9)       | 14.8 (10.5, 19.8)  | 15.1 (10.7, 20.2)    | 4.2 (1.3, 7.3)      | 3.9 (1.1, 6.8)       | 8.8 (5.5, 12.8)     | 7.1 (4.8, 10.3)      | 8 (6.5, 9.8)         | 8 (6.5, 9.8)         |                                                                                                                           |                                                                                                                           |                                                                                                                           |
|                                                  |                                      | <i>N deaths</i>                | 137 (93, 189)                     | 0 (0, 0)           | 1019 (728, 1359)     | 0 (0, 0)           | 1409 (847, 2161)     | 555 (346, 798)     | 4850 (3443, 6508)    | 2098 (1537, 2758)   | 2140 (1340, 2997)    | 1199 (787, 1638)    | 5563 (3466, 8108)    | 6642 (4272, 9010)    | 22973 (16606, 29340) |                                                                                                                           |                                                                                                                           |                                                                                                                           |
|                                                  | High-school                          | % <i>CHD</i>                   | 11.7 (8, 16.1)                    | 0 (0, 0)           | 23.2 (16.6, 30.9)    | 0 (0, 0)           | 9.4 (5.6, 14.4)      | 13.3 (8.8, 18.4)   | 16.9 (12, 22.7)      | 16.9 (12.4, 22.2)   | 6.9 (4.3, 9.7)       | 6.4 (4.2, 8.7)      | 7.4 (4.6, 10.8)      | 7.1 (4.8, 9.9)       | 8.9 (7.6, 10.3)      |                                                                                                                           |                                                                                                                           |                                                                                                                           |
|                                                  |                                      | <i>N deaths</i>                | 34 (26, 44)                       | 0 (0, 0)           | 198 (140, 253)       | 0 (0, 0)           | 370 (248, 511)       | 102 (89, 159)      | 1101 (801, 1460)     | 386 (290, 496)      | 865 (615, 1184)      | 284 (213, 360)      | 2008 (1281, 3021)    | 1585 (1077, 2305)    | 7034 (6011, 8306)    |                                                                                                                           |                                                                                                                           |                                                                                                                           |
|                                                  |                                      | % <i>CHD</i>                   | 17.1 (13, 22)                     | 0 (0, 0)           | 26.7 (18.8, 34.1)    | 0 (0, 0)           | 14.1 (9.5, 19.6)     | 13.7 (10, 17.9)    | 15.4 (11.2, 20.4)    | 15.9 (11.9, 20.4)   | 9.6 (6.8, 13.1)      | 8.6 (6.5, 11)       | 6.9 (4.4, 10.4)      | 8.5 (5.8, 12.4)      | 9.4 (8.1, 11.2)      |                                                                                                                           |                                                                                                                           |                                                                                                                           |
|                                                  | <b>Race</b>                          |                                |                                   |                    |                      |                    |                      |                    |                      |                     |                      |                     |                      |                      |                      |                                                                                                                           |                                                                                                                           |                                                                                                                           |
|                                                  | White                                | <i>N deaths</i>                | 58 (28, 100)                      | 0 (0, 0)           | 833 (576, 1153)      | 0 (0, 0)           | 1909 (1232, 2795)    | 662 (457, 904)     | 3004 (1422, 4931)    | 553 (181, 1000)     | 7094 (5090, 8989)    | 2942 (2242, 3701)   | 9294 (5448, 14266)   | 6726 (4394, 9578)    | 33196 (27748, 40011) |                                                                                                                           |                                                                                                                           |                                                                                                                           |
|                                                  |                                      | % <i>CHD</i>                   | 5.8 (2.8, 9.9)                    | 0 (0, 0)           | 21.4 (14.8, 29.6)    | 0 (0, 0)           | 12.2 (7.9, 17.8)     | 9.1 (4.3, 15)      | 11.9 (8.2, 16.2)     | 4.4 (1.4, 7.9)      | 17.3 (12.4, 21.9)    | 13.6 (10.3, 17.1)   | 14.5 (10.3, 18.7)    | 7.6 (4.5, 11.7)      | 8.2 (6.8, 9.8)       |                                                                                                                           |                                                                                                                           |                                                                                                                           |
|                                                  |                                      | <i>N deaths</i>                | 44 (31, 61)                       | 0 (0, 0)           | 343 (255, 437)       | 183 (143, 222)     | 703 (511, 922)       | 429 (321, 545)     | 1020 (669, 1413)     | 351 (230, 503)      | 1383 (1054, 1715)    | 763 (607, 928)      | 1066 (672, 1538)     | 1036 (695, 1458)     | 7341 (6544, 8208)    |                                                                                                                           |                                                                                                                           |                                                                                                                           |
|                                                  | Black                                | % <i>CHD</i>                   | 9.9 (6.9, 13.7)                   | 0 (0, 0)           | 22.4 (16.7, 28.5)    | 23.8 (18.6, 28.9)  | 16.5 (12, 21.6)      | 18.3 (13.7, 23.3)  | 13.6 (9, 18.9)       | 8.3 (5.5, 11.9)     | 20.8 (15.8, 25.7)    | 16.1 (12.8, 19.5)   | 11.1 (7, 16)         | 7 (4.7, 9.8)         | 12.8 (11.5, 14.4)    |                                                                                                                           |                                                                                                                           |                                                                                                                           |
|                                                  |                                      | <i>N deaths</i>                | 30 (23, 38)                       | 0 (0, 0)           | 39 (17, 66)          | 0 (0, 0)           | 317 (215, 437)       | 115 (83, 152)      | 445 (299, 622)       | 138 (96, 188)       | 482 (317, 647)       | 267 (177, 402)      | 717 (438, 1082)      | 746 (478, 1074)      | 2896 (2441, 3452)    |                                                                                                                           |                                                                                                                           |                                                                                                                           |
|                                                  |                                      | % <i>CHD</i>                   | 13.7 (10.4, 17.5)                 | 0 (0, 0)           | 5.9 (2.5, 9.9)       | 0 (0, 0)           | 18.6 (12.7, 25.7)    | 19.9 (14.3, 26.1)  | 15.4 (10.4, 21.5)    | 11.2 (7.8, 15.3)    | 8.6 (3.8, 13)        | 3.5 (1.1, 6.3)      | 10.6 (6.5, 16)       | 8.9 (5.7, 12.8)      | 10.5 (8.8, 12.5)     |                                                                                                                           |                                                                                                                           |                                                                                                                           |
|                                                  | Hispanic                             | <i>N deaths</i>                | 28 (21, 36)                       | 0 (0, 0)           | 47 (27, 75)          | 0 (0, 0)           | 214 (142, 294)       | 60 (42, 80)        | 359 (254, 489)       | 111 (79, 150)       | 482 (274, 747)       | 67 (39, 95)         | 539 (326, 842)       | 515 (328, 779)       | 2448 (2026, 2899)    |                                                                                                                           |                                                                                                                           |                                                                                                                           |
|                                                  |                                      | % <i>CHD</i>                   | 26.7 (20, 34.6)                   | 0 (0, 0)           | 14.1 (8.2, 22.5)     | 0 (0, 0)           | 24.6 (16.3, 33.8)    | 24.8 (17.2, 33.1)  | 23.9 (16.9, 32.5)    | 18.3 (13, 24.7)     | 28 (15.9, 43.4)      | 7 (4.1, 9.9)        | 13.7 (8.3, 21.4)     | 11.5 (7.3, 17.3)     | 16.4 (13.6, 19.5)    |                                                                                                                           |                                                                                                                           |                                                                                                                           |
|                                                  | Other                                | <i>N deaths</i>                | 125 (63, 201)                     | 0 (0, 0)           | 729 (479, 1052)      | 0 (0, 0)           | 3050 (2111, 4162)    | 1178 (849, 1578)   | 5984 (4305, 7977)    | 2693 (1975, 3467)   | 7791 (5875, 9702)    | 4169 (3203, 5069)   | 11944 (9749, 14189)  | 14487 (9749, 20836)  | 52711 (44681, 60826) |                                                                                                                           |                                                                                                                           |                                                                                                                           |
|                                                  |                                      | % <i>CHD</i>                   | 7.1 (3.5, 11.3)                   | 0 (0, 0)           | 11.3 (7.4, 16.4)     | 0 (0, 0)           | 13.6 (9.4, 18.5)     | 13.5 (9.7, 18)     | 13.4 (9.6, 17.8)     | 14.4 (10.6, 18.6)   | 14.8 (11.2, 18.4)    | 14.3 (11, 17.4)     | 8.4 (5.1, 12.4)      | 8.2 (5.5, 11.9)      | 10.4 (8.8, 12)       |                                                                                                                           |                                                                                                                           |                                                                                                                           |
|                                                  | <b>Total</b>                         | <i>N deaths</i>                | 50 (3, 118)                       |                    | 396 (168, 698)       |                    | 2761 (1735, 3903)    |                    | 6162 (4353, 8394)    |                     | 8986 (6948, 11197)   |                     | 19218 (12180, 26318) |                      |                      | <b>M: 21948 (16473, 28256)</b><br><b>F: 15318 (10298, 21693)</b><br><b>M: 10.6 (8, 13.7)</b><br><b>F: 9.3 (6.3, 13.2)</b> |                                                                                                                           |                                                                                                                           |
|                                                  |                                      | % <i>CHD</i>                   | 4.9 (0.3, 11.5)                   |                    | 7.6 (3.3, 13.5)      |                    | 12.6 (7.9, 17.8)     |                    | 12.9 (9.1, 17.6)     |                     | 14.3 (11.1, 17.8)    |                     | 8.3 (5.2, 11.3)      |                      |                      |                                                                                                                           |                                                                                                                           |                                                                                                                           |
|                                                  | <b>Education</b>                     |                                |                                   |                    |                      |                    |                      |                    |                      |                     |                      |                     |                      |                      |                      |                                                                                                                           |                                                                                                                           |                                                                                                                           |
|                                                  | <High-school                         | <i>N deaths</i>                | 10 (1, 22)                        | 0 (0, 0)           | 124 (57, 201)        | 50 (24, 81)        | 170 (4, 360)         | 62 (3, 130)        | 846 (521, 1237)      | 351 (200, 523)      | 362 (41, 696)        | 183 (6, 369)        | 2362 (1166, 3750)    | 2345 (1283, 3872)    | 6936 (5161, 8963)    |                                                                                                                           |                                                                                                                           |                                                                                                                           |
|                                                  |                                      | % <i>CHD</i>                   | 5.6 (0.5, 13.1)                   | 0 (0, 0)           | 16.9 (7.8, 27.4)     | 17.2 (8.3, 27.7)   | 5.3 (0.1, 11.3)      | 5.2 (0.2, 10.9)    | 14.1 (8.7, 20.6)     | 4.4 (0.2, 21.5)     | 4.1 (0.5, 7.8)       | 3.8 (0.1, 7.7)      | 8.6 (4.3, 13.7)      | 6.8 (3.7, 11.2)      | 7.7 (5.8, 10)        |                                                                                                                           |                                                                                                                           |                                                                                                                           |
|                                                  |                                      | <i>N deaths</i>                | 57 (21, 104)                      | 0 (0, 0)           | 570 (282, 883)       | 0 (0, 0)           | 918 (311, 1559)      | 318 (131, 559)     | 3536 (2203, 5274)    | 1402 (869, 2079)    | 1649 (871, 2523)     | 849 (420, 1262)     | 18853 (14974, 22978) | 18853 (14974, 22978) | 18853 (14974, 22978) |                                                                                                                           |                                                                                                                           |                                                                                                                           |
|                                                  | High-school                          | % <i>CHD</i>                   | 11.1 (4.2, 20.2)                  | 0 (0, 0)           | 21.7 (10.7, 33.5)    | 0 (0, 0)           | 8.6 (3.6, 15.3)      | 8.5 (3.5, 14.9)    | 16 (10, 23.9)        | 16 (9.9, 23.8)      | 6.7 (3.5, 10.3)      | 6.3 (3.1, 9.3)      | 7.3 (3.8, 11.8)      | 6.8 (3.6, 10.9)      | 8.6 (6.8, 10.5)      |                                                                                                                           |                                                                                                                           |                                                                                                                           |
|                                                  |                                      | <i>N deaths</i>                | 12 (5, 21)                        | 0 (0, 0)           | 104 (49, 160)        | 0 (0, 0)           | 247 (127, 378)       | 63 (32, 99)        | 796 (507, 1154)      | 239 (147, 347)      | 652 (406, 973)       | 189 (120, 257)      | 1486 (761, 2479)     | 1027 (540, 1757)     | 4901 (3854, 6176)    |                                                                                                                           |                                                                                                                           |                                                                                                                           |
|                                                  |                                      | % <i>CHD</i>                   | 16.2 (6.3, 28.1)                  | 0 (0, 0)           | 15.3 (6.8, 38.4)     | 0 (0, 0)           | 13.6 (6.8, 20.3)     | 12.7 (6.5, 20.1)   | 14.6 (9.3, 21.2)     | 14.9 (9.1, 21.6)    | 9.3 (5.8, 13.8)      | 8.5 (5.3, 11.4)     | 6.8 (3.5, 11.4)      | 9.2 (7.2, 11.5)      | 9.2 (7.2, 11.5)      |                                                                                                                           |                                                                                                                           |                                                                                                                           |
|                                                  | <b>Race</b>                          |                                |                                   |                    |                      |                    |                      |                    |                      |                     |                      |                     |                      |                      |                      |                                                                                                                           |                                                                                                                           |                                                                                                                           |
|                                                  | White                                | <i>N deaths</i>                | 25 (1, 62)                        | 0 (0, 0)           | 518 (269, 825)       | 0 (0, 0)           | 1376 (716, 2276)     | 432 (226, 671)     | 2283 (709, 4166)     | 382 (0, 836)        | 5638 (3645, 7553)    | 2116 (1423, 2874)   | 7071 (3264, 12046)   | 4555 (2256, 7415)    | 24475 (19028, 31242) |                                                                                                                           |                                                                                                                           |                                                                                                                           |
|                                                  |                                      | % <i>CHD</i>                   | 5.4 (0.1, 13.4)</                 |                    |                      |                    |                      |                    |                      |                     |                      |                     |                      |                      |                      |                                                                                                                           |                                                                                                                           |                                                                                                                           |

**eTable 14. Absolute and proportional cardiometabolic disease mortality associated with suboptimal dietary habits in the US in 2012 by population subgroups (continued)**

| Dietary Factor <sup>a</sup> | Cardiometabolic Disease <sup>b</sup> | Population strata <sup>c</sup> | Associated mortality <sup>d</sup> | Age                |                      |                    |                      |                    |                      |                    |                      |                    |                      |                             |                                                      | Total (25+ y)<br>(95% UIs) |
|-----------------------------|--------------------------------------|--------------------------------|-----------------------------------|--------------------|----------------------|--------------------|----------------------|--------------------|----------------------|--------------------|----------------------|--------------------|----------------------|-----------------------------|------------------------------------------------------|----------------------------|
|                             |                                      |                                |                                   | 25-34 y            |                      | 35-44 y            |                      | 45-54 y            |                      | 55-64 y            |                      | 65-74 y            |                      | 75+ y                       |                                                      |                            |
|                             |                                      |                                |                                   | Males<br>(95% UIs) | Females<br>(95% UIs) | Males<br>(95% UIs)          | Females<br>(95% UIs)                                 |                            |
| >2000 mg/d                  | % HHD                                |                                | 10.4 (1.5, 18.5)                  |                    | 14.3 (8.1, 19.9)     |                    | 24.5 (18.7, 29.7)    |                    | 25.5 (20.2, 30.7)    |                    | 29.3 (23.3, 34.6)    |                    | 18.1 (14.2, 22.5)    |                             | <b>M: 22.8 (19.7, 26.2)<br/>F: 20 (16, 23.9)</b>     |                            |
|                             |                                      | <b>Education</b>               |                                   |                    |                      |                    |                      |                    |                      |                    |                      |                    |                      |                             |                                                      |                            |
|                             |                                      | <High-school                   | <i>N deaths</i>                   | 7 (1, 14)          | 0 (0, 0)             | 63 (44, 81)        | 25 (18, 32)          | 54 (6, 101)        | 23 (1, 43)           | 174 (123, 220)     | 93 (65, 123)         | 53 (7, 98)         | 30 (0, 59)           | 311 (219, 400)              | 507 (358, 661)                                       | 1340 (1144, 1535)          |
|                             |                                      |                                | % HHD                             | 11.4 (1.1, 21.2)   | 0 (0, 0)             | 32.1 (22.5, 41.8)  | 32.4 (23.1, 40.6)    | 10.5 (1.1, 19.5)   | 10.8 (0.5, 20.4)     | 27.9 (19.6, 35.2)  | 27.9 (19.4, 36.8)    | 9.4 (1.3, 17.1)    | 8.3 (0.1, 16.2)      | 18.9 (13.3, 24.4)           | 15.2 (10.7, 19.8)                                    | 16.8 (14.4, 19.3)          |
|                             |                                      | High-school                    | <i>N deaths</i>                   | 40 (23, 56)        | 0 (0, 0)             | 282 (211, 345)     | 0 (0, 0)             | 317 (166, 453)     | 152 (75, 219)        | 874 (633, 1098)    | 402 (289, 499)       | 240 (136, 337)     | 166 (84, 241)        | 513 (352, 685)              | 1072 (756, 1435)                                     | 4049 (3562, 4530)          |
|                             |                                      |                                | % HHD                             | 22 (12.6, 30.5)    | 0 (0, 0)             | 40.2 (30, 49.2)    | 0 (0, 0)             | 17.5 (9.1, 24.9)   | 17.3 (8.5, 24.9)     | 31.3 (22.7, 39.4)  | 31.5 (22.6, 39.1)    | 14.1 (8, 19.9)     | 13.3 (6.7, 19.3)     | 16.4 (11.2, 21.8)           | 15.4 (10.9, 20.6)                                    | 19.2 (16.9, 21.5)          |
|                             |                                      | College                        | <i>N deaths</i>                   | 11 (8, 14)         | 0 (0, 0)             | 57 (41, 72)        | 0 (0, 0)             | 82 (57, 107)       | 38 (25, 50)          | 194 (139, 248)     | 89 (62, 115)         | 106 (70, 145)      | 47 (28, 58)          | 185 (123, 257)              | 243 (165, 321)                                       | 1045 (906, 1184)           |
|                             |                                      |                                | % HHD                             | 30.7 (21.9, 40.1)  | 0 (0, 0)             | 44.2 (31.4, 55.3)  | 0 (0, 0)             | 25.7 (17.7, 33.5)  | 23.9 (16.2, 31.8)    | 28.3 (20.3, 36.1)  | 29.7 (20.7, 38.3)    | 20.2 (14.3, 27.5)  | 17.7 (11.7, 23.9)    | 15.3 (10.2, 21.3)           | 18.7 (12.7, 24.7)                                    | 21 (18.2, 23.8)            |
|                             |                                      | <b>Race</b>                    |                                   |                    |                      |                    |                      |                    |                      |                    |                      |                    |                      |                             |                                                      |                            |
|                             |                                      | White                          | <i>N deaths</i>                   | 16 (0, 31)         | 0 (0, 0)             | 197 (145, 245)     | 0 (0, 0)             | 353 (233, 458)     | 136 (92, 179)        | 468 (146, 732)     | 96 (5, 191)          | 631 (447, 803)     | 329 (241, 419)       | 800 (467, 1102)             | 934 (593, 1270)                                      | 3939 (3333, 4574)          |
|                             |                                      |                                | % HHD                             | 11.3 (0, 22.3)     | 0 (0, 0)             | 37.6 (27.6, 46.8)  | 0 (0, 0)             | 22.4 (14.8, 29.1)  | 21.9 (14.8, 28.8)    | 17.9 (5.6, 28)     | 17.5 (5, 17.3)       | 33.7 (23.9, 42.9)  | 27.5 (20.1, 34.9)    | 17.1 (10, 23.5)             | 10.1 (6.4, 13.7)                                     | 16.5 (14, 19.2)            |
|                             |                                      | Black                          | <i>N deaths</i>                   | 17 (9, 26)         | 0 (0, 0)             | 131 (94, 165)      | 82 (60, 103)         | 249 (180, 319)     | 169 (119, 214)       | 298 (163, 417)     | 105 (52, 158)        | 287 (205, 366)     | 161 (113, 205)       | 195 (129, 265)              | 230 (158, 311)                                       | 1919 (1720, 2134)          |
|                             |                                      |                                | % HHD                             | 17.6 (8.9, 27.1)   | 0 (0, 0)             | 36.8 (26.5, 46.2)  | 37.9 (27.5, 47.3)    | 28 (20.2, 35.9)    | 30.4 (21.4, 38.5)    | 24.2 (13.2, 33.8)  | 15.4 (7.6, 23.1)     | 37.4 (26.6, 47.6)  | 30.4 (21.3, 38.6)    | 22.1 (14.6, 30.1)           | 14.2 (9.7, 19.2)                                     | 24.4 (21.8, 27.1)          |
|                             |                                      | Hispanic                       | <i>N deaths</i>                   | 9 (6, 13)          | 0 (0, 0)             | 13 (1, 25)         | 0 (0, 0)             | 71 (52, 91)        | 29 (21, 37)          | 80 (51, 106)       | 29 (19, 40)          | 34 (12, 57)        | 9 (0, 18)            | 86 (57, 118)                | 117 (81, 157)                                        | 479 (413, 546)             |
|                             |                                      |                                | % HHD                             | 25.5 (16.1, 33.9)  | 0 (0, 0)             | 10.7 (0.5, 20.3)   | 0 (0, 0)             | 31.3 (24.1, 42.1)  | 35.5 (25.6, 44.8)    | 28.5 (18.2, 37.8)  | 21.6 (14.4, 29.4)    | 17.2 (6.1, 28.8)   | 7.6 (0.1, 15.5)      | 22.2 (14.8, 30.6)           | 18.6 (12.8, 24.8)                                    | 21.3 (18.4, 24.3)          |
| Other                       | <i>N deaths</i>                      | 7 (5, 8)                       | 0 (0, 0)                          | 12 (6, 18)         | 0 (0, 0)             | 32 (24, 41)        | 10 (7, 13)           | 55 (37, 70)        | 17 (12, 22)          | 71 (31, 104)       | 9 (5, 14)            | 62 (40, 86)        | 79 (50, 114)         | 356 (293, 413)              |                                                      |                            |
|                             | % HHD                                | 47.8 (34.8, 59.1)              | 0 (0, 0)                          | 25.7 (12.6, 38.4)  | 0 (0, 0)             | 43.1 (31.7, 54.4)  | 45.4 (33.1, 57.3)    | 43 (28.7, 54.9)    | 34.8 (23.9, 45.4)    | 62.8 (27.7, 92.4)  | 14.5 (7.2, 22.1)     | 23.7 (14.8, 34.1)  | 33 (27.1, 38.3)      | 7505 (6627, 8325)           |                                                      |                            |
| <b>Total</b>                | <i>N deaths</i>                      | 39 (6, 70)                     | 0 (0, 0)                          | 216 (123, 299)     | 0 (0, 0)             | 673 (456, 870)     | 313 (212, 410)       | 1061 (778, 1340)   | 526 (375, 672)       | 872 (633, 1106)    | 547 (397, 695)       | 1128 (776, 1506)   | 2115 (1498, 2767)    | <b>7505 (6627, 8325)</b>    |                                                      |                            |
|                             | % HHD                                | 13.7 (2, 24.4)                 | 0 (0, 0)                          | 20.6 (11.7, 28.6)  | 0 (0, 0)             | 24.4 (16.5, 31.5)  | 24.5 (16.6, 32)      | 24.9 (18.3, 31.5)  | 26.7 (19, 34.1)      | 29.5 (21.4, 37.5)  | 28.6 (20.8, 36.4)    | 18.3 (12.6, 24.4)  | 17.9 (12.7, 23.4)    | <b>21.4 (18.9, 23.8)</b>    |                                                      |                            |
| Sodium <sup>h</sup>         | Other CVD <sup>f</sup>               | <b>Overall by age</b>          | <i>N deaths</i>                   | 4 (1, 9)           |                      | 34 (15, 56)        |                      | 307 (212, 413)     |                      | 902 (651, 1181)    |                      | 1877 (1462, 2317)  |                      | 5029 (3484, 6698)           | <b>M: 3668 (3313, 4064)<br/>F: 3771 (3281, 4256)</b> |                            |
| >2000 mg/d                  | % other CVD                          |                                | 4.8 (0.8, 10.1)                   |                    | 8.3 (3.7, 13.9)      |                    | 17.4 (12, 23.4)      |                    | 17.6 (12.7, 23)      |                    | 18.2 (14.2, 22.5)    |                    | 8.1 (5.6, 10.8)      |                             | <b>M: 7.9 (7.1, 8.8)<br/>F: 7.1 (6.1, 8.0)</b>       |                            |
| >2000 mg/d                  | % TSTK                               |                                | 5.3 (1.7, 9.1)                    |                    | 8.1 (4.9, 12.3)      |                    | 17.5 (13.7, 21.8)    |                    | 17.5 (14.5, 20.8)    |                    | 18.2 (15.4, 21.1)    |                    | 8.1 (6.3, 10.2)      |                             | <b>M: 6195 (5227, 7293)<br/>F: 7574 (6092, 9346)</b> |                            |
|                             |                                      | <b>Education</b>               |                                   |                    |                      |                    |                      |                    |                      |                    |                      |                    |                      |                             |                                                      |                            |
|                             |                                      | <High-school                   | <i>N deaths</i>                   | 5 (2, 9)           | 0 (0, 0)             | 52 (32, 73)        | 37 (26, 51)          | 57 (22, 94)        | 36 (15, 63)          | 252 (188, 315)     | 166 (125, 214)       | 123 (49, 207)      | 95 (36, 155)         | 705 (497, 957)              | 1042 (716, 1390)                                     | 2580 (2153, 3011)          |
|                             |                                      |                                | % TSTK                            | 7.9 (2.6, 14.6)    | 0 (0, 0)             | 23.5 (14.6, 32.9)  | 23.7 (16.5, 32.7)    | 7.7 (2.9, 12.5)    | 7.4 (3, 12.9)        | 19.1 (14.3, 24)    | 19 (14.3, 24.6)      | 5.6 (2.2, 9.3)     | 4.9 (1.9, 8)         | 8.6 (6, 11.6)               | 6.7 (4.6, 9)                                         | 8.1 (6.8, 9.5)             |
|                             |                                      | High-school                    | <i>N deaths</i>                   | 30 (19, 46)        | 0 (0, 0)             | 183 (122, 243)     | 0 (0, 0)             | 242 (148, 347)     | 211 (128, 308)       | 843 (653, 1052)    | 675 (509, 847)       | 471 (329, 626)     | 439 (308, 591)       | 2437 (1674, 3290)           | 6741 (5773, 7742)                                    |                            |
|                             |                                      |                                | % TSTK                            | 15.1 (9.2, 22.9)   | 0 (0, 0)             | 29.9 (19.8, 39.6)  | 0 (0, 0)             | 12.4 (7.6, 17.8)   | 12.2 (7.4, 17.8)     | 21.3 (16.5, 26.6)  | 21.9 (16.5, 27.5)    | 8.7 (6.1, 11.6)    | 8.1 (5.7, 10.9)      | 7.2 (4.9, 10.2)             | 6.8 (4.7, 9.2)                                       | 9 (7.7, 10.3)              |
|                             |                                      | College                        | <i>N deaths</i>                   | 7 (5, 9)           | 0 (0, 0)             | 37 (24, 51)        | 0 (0, 0)             | 61 (41, 83)        | 12 (34, 73)          | 182 (138, 232)     | 129 (93, 166)        | 211 (161, 273)     | 120 (90, 153)        | 594 (404, 819)              | 1869 (1597, 2171)                                    |                            |
|                             |                                      |                                | % TSTK                            | 22 (14.8, 28.9)    | 0 (0, 0)             | 33.2 (21.8, 45.4)  | 0 (0, 0)             | 18.4 (12.4, 25.1)  | 17.3 (11.6, 24.8)    | 19.5 (14.7, 24.8)  | 20.2 (14.5, 26.1)    | 12.3 (9.4, 15.8)   | 11 (8.3, 14.1)       | 6.8 (4.7, 9.7)              | 8.4 (5.8, 11.6)                                      | 9.7 (8.3, 11.3)            |
|                             |                                      | <b>Race</b>                    |                                   |                    |                      |                    |                      |                    |                      |                    |                      |                    |                      |                             |                                                      |                            |
|                             |                                      | White                          | <i>N deaths</i>                   | 12 (3, 21)         | 0 (0, 0)             | 127 (88, 167)      | 0 (0, 0)             | 252 (167, 348)     | 218 (144, 309)       | 471 (244, 691)     | 163 (64, 282)        | 1491 (1175, 1829)  | 1061 (830, 1307)     | 2007 (1302, 2879)           | 2147 (1436, 3002)                                    | 7992 (6818, 9228)          |
|                             |                                      |                                | % TSTK                            | 7.9 (2.3, 14.1)    | 0 (0, 0)             | 28 (19.4, 36.8)    | 0 (0, 0)             | 15.5 (10.3, 21.5)  | 15.6 (10.3, 22.1)    | 11.8 (6.1, 17.3)   | 5.7 (2.2, 9.9)       | 17.3 (13.5, 21.3)  | 10.3 (7.6, 13.9)     | 17.6 (12.9, 22.3)           | 11.3 (8.8, 14.8)                                     | 14.3 (12.9, 15.7)          |
|                             |                                      | Black                          | <i>N deaths</i>                   | 9 (5, 13)          | 0 (0, 0)             | 70 (46, 96)        | 59 (41, 78)          | 181 (126, 249)     | 167 (114, 227)       | 248 (167, 341)     | 119 (76, 168)        | 393 (299, 491)     | 274 (215, 337)       | 258 (174, 352)              | 315 (219, 431)                                       | 2099 (1875, 2323)          |
|                             |                                      |                                | % TSTK                            | 12.5 (7.8, 18.1)   | 0 (0, 0)             | 27.4 (18, 37.6)    | 28.3 (19.6, 37.4)    | 20.3 (14.1, 27.9)  | 22 (15, 30)          | 16.3 (11, 22.4)    | 10.1 (6.5, 14.4)     | 24.6 (18.7, 30.7)  | 19 (15, 23.4)        | 10 (6.7, 13.6)              | 6.2 (4.3, 8.5)                                       | 13.4 (12, 14.9)            |
|                             |                                      | Hispanic                       | <i>N deaths</i>                   | 11 (7, 15)         | 0 (0, 0)             | 14 (4, 29)         | 0 (0, 0)             | 97 (65, 130)       | 67 (43, 89)          | 113 (79, 151)      | 54 (39, 71)          | 68 (37, 96)        | 27 (10, 46)          | 175 (116, 252)              | 226 (156, 308)                                       | 853 (738, 981)             |
|                             |                                      |                                | % TSTK                            | 18.1 (11.6, 25.8)  | 0 (0, 0)             | 7.3 (1.9, 15.1)    | 0 (0, 0)             | 24.4 (16.3, 32.5)  | 25.9 (16.7, 34.6)    | 19.4 (13.7, 25.9)  | 14.3 (10.4, 19)      | 10.7 (5.8, 15.1)   | 4.5 (1.7, 7.6)       | 10.2 (6.8, 14.7)            | 8.3 (5.7, 11.3)                                      | 11.1 (9.6, 12.8)           |
| Other                       | <i>N deaths</i>                      | 6 (4, 9)                       | 0 (0, 0)                          | 11 (6, 18)         | 0 (0, 0)             | 62 (42, 82)        | 47 (30, 63)          | 97 (71, 130)       | 62 (44, 79)          | 168 (105, 239)     | 35 (22, 49)          | 154 (97, 223)      | 192 (120, 288)       | 839 (721, 973)              |                                                      |                            |
|                             | % TSTK                               | 36 (23, 49.9)                  | 0 (0, 0)                          | 18.7 (10, 29.4)    | 0 (0, 0)             | 32.4 (22, 42.7)    | 33.7 (21.8, 45.4)    | 29.9 (21.8, 40)    | 24.4 (17.4, 31.2)    | 36.4 (22.8, 51.8)  | 8.8 (5.6, 12.2)      | 13.2 (8.3, 19.1)   | 10.7 (6.7, 16.1)     | 17.2 (14.7, 19.9)           |                                                      |                            |
| <b>Total</b>                | <i>N deaths</i>                      | 28 (9, 49)                     | 0 (0, 0)                          | 140 (85, 213)      | 0 (0, 0)             | 544 (376, 723)     | 447 (304, 610)       | 1081 (829, 1362)   | 861 (604, 1097)      | 1783 (1397, 2177)  | 1535 (1238, 1843)    | 2613 (1784, 3622)  | 4734 (3347, 6472)    | <b>13787 (12018, 15870)</b> |                                                      |                            |
|                             | % TSTK                               | 9.6 (3, 16.4)                  | 0 (0, 0)                          | 14.6 (8.8, 22.1)   | 0 (0, 0)             | 17.5 (12.1, 23.3)  | 17.5 (11.9, 23.9)    | 16.9 (12.9, 21.2)  | 18.5 (13.7, 23.5)    | 18.6 (14.5, 22.7)  | 17.9 (14.4, 21.5)    | 8.1 (5.6, 11.3)    | 8 (5.7, 11)          | <b>10.7 (9.4, 12.4)</b>     |                                                      |                            |
| Sodium <sup>h</sup>         | Ischemic Stroke                      | <b>Overall by age</b>          | <i>N deaths</i>                   | 3 (0, 6)           |                      | 14 (7, 20)         |                      | 99 (75, 123)       |                      | 203 (162, 247)     |                      | 371 (288, 454)     |                      | 941 (666, 1219)             | <b>M: 717 (586, 867)<br/>F: 902 (679, 1159)</b>      |                            |
| >2000 mg/d                  | % ISTK                               |                                | 4.7 (0.5, 8.6)                    |                    | 7.8 (4.1, 11.5)      |                    | 16.7 (12.7, 20.9)    |                    | 16.9 (13.5, 20.6)    |                    | 17.9 (13.9, 21.9)    |                    | 7.8 (5.5, 10.1)      |                             | <b>M: 11.2 (9.1, 13.5)<br/>F: 9.3 (7, 11.9)</b>      |                            |
| >2000 mg/d                  | % ISTK                               | <b>Education</b>               |                                   |                    |                      |                    |                      |                    |                      |                    |                      |                    |                      |                             |                                                      |                            |
|                             |                                      | <High-school                   | <i>N deaths</i>                   | 0 (0, 1)           | 0 (0, 0)             | 5 (3, 6)           | 2 (1, 2)             | 5 (0, 9)           | 3 (0, 7)             | 29 (20, 37)        | 20 (14, 28)          | 15 (2, 29)         | 12 (0, 25)           | 90 (59, 129)                | 139 (90, 203)                                        | 323 (261, 395)             |

**eTable 14. Absolute and proportional cardiometabolic disease mortality associated with suboptimal dietary habits in the US in 2012 by population subgroups (continued)**

| Dietary Factor <sup>a</sup> | Cardiometabolic Disease <sup>b</sup> | Population strata <sup>c</sup> | Associated mortality <sup>d</sup> | Age                             |                      |                                    |                                  |                                     |                                    |                                     |                                   |                                      |                                     |                                       |                                                | Total (25+ y)<br>(95% UIs)                                                             |
|-----------------------------|--------------------------------------|--------------------------------|-----------------------------------|---------------------------------|----------------------|------------------------------------|----------------------------------|-------------------------------------|------------------------------------|-------------------------------------|-----------------------------------|--------------------------------------|-------------------------------------|---------------------------------------|------------------------------------------------|----------------------------------------------------------------------------------------|
|                             |                                      |                                |                                   | 25-34 y                         |                      | 35-44 y                            |                                  | 45-54 y                             |                                    | 55-64 y                             |                                   | 65-74 y                              |                                     | 75+ y                                 |                                                |                                                                                        |
|                             |                                      |                                |                                   | Males<br>(95% UIs)              | Females<br>(95% UIs) | Males<br>(95% UIs)                 | Females<br>(95% UIs)             | Males<br>(95% UIs)                  | Females<br>(95% UIs)               | Males<br>(95% UIs)                  | Females<br>(95% UIs)              | Males<br>(95% UIs)                   | Females<br>(95% UIs)                | Males<br>(95% UIs)                    | Females<br>(95% UIs)                           |                                                                                        |
|                             |                                      | High-school                    | % <i>ISTK</i><br><i>N deaths</i>  | 8.4 (1.8, 15.9)<br>0 (0, 0)     | 0 (0, 0)<br>0 (0, 0) | 22.9 (15.8, 30.4)<br>19 (14, 24)   | 23.2 (16.6, 30.4)<br>0 (0, 0)    | 7.1 (0.4, 14.4)<br>28 (14, 40)      | 7.1 (0.4, 14.4)<br>18 (9, 28)      | 18.6 (13, 24)<br>59 (42, 76)        | 18.6 (12.5, 25.3)<br>59 (42, 76)  | 5.4 (0.8, 10.6)<br>50 (28, 74)       | 4.9 (0, 9.7)<br>141 (89, 198)       | 8.2 (5.3, 11.7)<br>314 (202, 444)     | 6.5 (4.2, 9.5)<br>777 (639, 931)               | 7.7 (6.2, 9.4)<br>777 (639, 931)                                                       |
|                             |                                      | College                        | % <i>ISTK</i><br><i>N deaths</i>  | 15.6 (7.7, 22.9)<br>1 (1, 1)    | 0 (0, 0)<br>0 (0, 0) | 29.1 (21.1, 36.8)<br>3 (2, 3)      | 0 (0, 0)<br>0 (0, 0)             | 11.9 (6.1, 17.3)<br>5 (3, 9)        | 11.8 (6, 18)<br>5 (3, 6)           | 20.9 (14.7, 27.1)<br>21 (15, 28)    | 20.9 (15, 27.1)<br>12 (8, 15)     | 8.5 (4.7, 12.5)<br>12 (5, 33)        | 7.9 (4.2, 11.7)<br>56 (35, 84)      | 6.9 (4.4, 9.7)<br>216 (178, 261)      | 6.6 (4.2, 9.3)<br>8.4 (6.9, 10.1)              | 8.4 (6.9, 10.1)<br>216 (178, 261)                                                      |
|                             |                                      | <b>Race</b>                    | % <i>ISTK</i>                     | 22.7 (15, 30.2)                 | 0 (0, 0)             | 32.6 (23.1, 41.6)                  | 0 (0, 0)                         | 17.4 (11.9, 23.6)                   | 16.7 (11.1, 22.7)                  | 19 (13.1, 24.6)                     | 19.8 (13.6, 25.4)                 | 12 (7.7, 17)                         | 10.8 (6.8, 14.8)                    | 6.4 (4, 9.6)                          | 8.1 (4.9, 11.8)                                | 9 (7.4, 10.9)                                                                          |
|                             |                                      | White                          | <i>N deaths</i><br>% <i>ISTK</i>  | 1 (0, 3)<br>8.2 (0, 15.8)       | 0 (0, 0)<br>0 (0, 0) | 15 (11, 20)<br>27.3 (19.4, 34.9)   | 0 (0, 0)<br>0 (0, 0)             | 29 (19, 39)<br>15 (9.8, 20.4)       | 23 (15, 32)<br>14.8 (9.6, 20.3)    | 59 (18, 95)<br>25 (13, 37)          | 16 (1, 33)<br>5.5 (0.2, 11.6)     | 173 (119, 225)<br>21.1 (14.6, 27.6)  | 116 (80, 152)<br>16.9 (11.6, 22.2)  | 247 (140, 372)<br>7.3 (4.1, 10.9)     | 278 (165, 409)<br>4.2 (2.5, 6.2)               | 963 (784, 1160)<br>7.5 (6.1, 9.1)                                                      |
|                             |                                      | Black                          | <i>N deaths</i><br>% <i>ISTK</i>  | 1 (0, 2)<br>12.4 (6, 20.3)      | 0 (0, 0)<br>0 (0, 0) | 4 (3, 6)<br>26.5 (18.6, 34.7)      | 5 (4, 6)<br>28.1 (20, 35.8)      | 1 (0, 3)<br>19.3 (14.2, 25.3)       | 8 (6, 11)<br>21.1 (14.7, 27.5)     | 4 (3, 5)<br>15.8 (8.2, 23.2)        | 5 (3, 7)<br>9.7 (4.5, 15.3)       | 8 (3, 13)<br>24.2 (16.6, 32.3)       | 3 (0, 7)<br>18.8 (12.9, 24.6)       | 31 (20, 47)<br>9.7 (6.1, 14.3)        | 93 (76, 112)<br>6 (3.8, 8.8)                   | 12 (10.4, 13.8)<br>12 (10.4, 13.8)                                                     |
|                             |                                      | Hispanic                       | <i>N deaths</i><br>% <i>ISTK</i>  | 1 (1, 2)<br>18.5 (12.7, 25.3)   | 0 (0, 0)<br>0 (0, 0) | 1 (0, 3)<br>7.4 (0, 14.9)          | 0 (0, 0)<br>0 (0, 0)             | 1 (0, 3)<br>23.2 (16.3, 30)         | 0 (0, 0)<br>2.7 (1.8, 31.8)        | 0 (0, 0)<br>18.7 (11.8, 26.1)       | 5 (3, 7)<br>14.2 (9.2, 19.5)      | 8 (3, 13)<br>10.4 (3.9, 17.6)        | 3 (0, 7)<br>4.5 (0, 9.1)            | 20 (12, 30)<br>9.8 (5.7, 14.8)        | 93 (76, 112)<br>8.1 (5.1, 12)                  | 93 (76, 112)<br>10.1 (8.2, 12.2)                                                       |
|                             |                                      | Other                          | <i>N deaths</i><br>% <i>ISTK</i>  | 0 (0, 0)<br>0 (0, 0)            | 0 (0, 0)<br>0 (0, 0) | 1 (1, 2)<br>18.5 (8.7, 28.2)       | 0 (0, 0)<br>0 (0, 0)             | 5 (3, 6)<br>31.2 (21.6, 40.3)       | 2 (1, 3)<br>32.3 (22.7, 43)        | 7 (5, 9)<br>29.5 (19.2, 39.1)       | 5 (3, 7)<br>23.6 (16.6, 31)       | 5 (3, 7)<br>35.1 (15.1, 57.3)        | 3 (1, 4)<br>8.6 (3.9, 13.3)         | 12 (7, 19)<br>12.6 (7.5, 19.5)        | 18 (10, 28)<br>10.3 (5.8, 15.7)                | 63 (51, 77)<br>15.2 (12.2, 18.5)                                                       |
|                             |                                      | <b>Total</b>                   | <i>N deaths</i><br>% <i>ISTK</i>  | 3 (0, 6)<br>9.6 (1, 17.6)       | 0 (0, 0)<br>0 (0, 0) | 14 (7, 20)<br>14.3 (7.5, 21.1)     | 0 (0, 0)<br>0 (0, 0)             | 59 (40, 78)<br>16.9 (11.4, 22.2)    | 40 (27, 53)<br>16.9 (11.3, 22.3)   | 122 (88, 156)<br>16.3 (11.8, 21)    | 81 (57, 105)<br>17.9 (12.6, 23.2) | 199 (136, 261)<br>18 (12.3, 23.7)    | 172 (123, 219)<br>7.9 (5.1, 11.1)   | 321 (207, 455)<br>17.7 (12.7, 22.6)   | 615 (384, 854)<br>10.1 (8.4, 12)               | <b>1629 (1349, 1928)</b><br><b>M: 13.1 (10.4, 16.3)</b><br><b>F: 11.5 (8.5, 15.2)</b>  |
| <b>Sodium<sup>h</sup></b>   | <b>Hemorrhagic Stroke</b>            | <b>Overall by age</b>          | <i>N deaths</i>                   | 21 (1, 41)                      |                      | 93 (40, 160)                       |                                  | 582 (400, 802)                      |                                    | 830 (594, 1094)                     |                                   | 1057 (830, 1318)                     |                                     | 1408 (824, 2057)                      |                                                | <b>M: 1958 (1545, 2432)</b><br><b>F: 2030 (1510, 2696)</b>                             |
| <b>(&gt;2000 mg/d)</b>      |                                      |                                | % <i>HSTK</i>                     | 5.5 (0.2, 10.9)                 |                      | 8.1 (3.4, 13.9)                    |                                  | 17.6 (12.1, 24.3)                   |                                    | 17.5 (12.5, 23.1)                   |                                   | 18.2 (14.3, 22.8)                    |                                     | 8.2 (4.8, 11.9)                       |                                                | <b>M: 13.1 (10.4, 16.3)</b><br><b>F: 11.5 (8.5, 15.2)</b>                              |
|                             |                                      | <b>Education</b>               |                                   |                                 |                      |                                    |                                  |                                     |                                    |                                     |                                   |                                      |                                     |                                       |                                                |                                                                                        |
|                             |                                      | <High-school                   | <i>N deaths</i><br>% <i>HSTK</i>  | 4 (0, 8)<br>7.8 (1, 17.1)       | 0 (0, 0)<br>0 (0, 0) | 37 (19, 58)<br>23.4 (12, 36.1)     | 25 (13, 39)<br>23.7 (12.7, 36.7) | 31 (3, 63)<br>7.6 (0.8, 15.3)       | 19 (2, 44)<br>7.2 (0.6, 16.4)      | 95 (58, 138)<br>19.2 (11.6, 27.7)   | 65 (37, 101)<br>18.8 (10.9, 29.3) | 31 (5, 60)<br>5.6 (0.9, 11)          | 25 (0, 52)<br>4.8 (0, 9.9)          | 128 (59, 209)<br>8.7 (4, 14.2)        | 172 (75, 273)<br>7 (3, 11.1)                   | 636 (496, 793)<br>9.2 (7.2, 11.5)                                                      |
|                             |                                      | High-school                    | <i>N deaths</i><br>% <i>HSTK</i>  | 22 (10, 37)<br>14.9 (7.1, 24.9) | 0 (0, 0)<br>0 (0, 0) | 116 (58, 170)<br>30.3 (15.2, 44.3) | 0 (0, 0)<br>0 (0, 0)             | 132 (56, 228)<br>12.4 (5.2, 21.3)   | 131 (59, 223)<br>21.3 (13.2, 31.6) | 345 (215, 498)<br>22 (14, 31.6)     | 312 (199, 448)<br>8.8 (4.4, 13.3) | 146 (74, 221)<br>22 (14, 31.6)       | 151 (76, 228)<br>8.1 (4.1, 12.3)    | 266 (106, 450)<br>7 (2.9, 11.7)       | 449 (183, 751)<br>10.6 (8.4, 12.9)             | 2091 (1654, 2534)<br>10.9 (8.4, 12.9)                                                  |
|                             |                                      | College                        | <i>N deaths</i><br>% <i>HSTK</i>  | 5 (3, 7)<br>21.9 (12.3, 31.6)   | 0 (0, 0)<br>0 (0, 0) | 28 (16, 41)<br>33 (18.6, 48.5)     | 0 (0, 0)<br>0 (0, 0)             | 36 (18, 57)<br>18.4 (9.4, 29.1)     | 34 (19, 56)<br>17.2 (9.4, 29.1)    | 79 (50, 117)<br>19.4 (12.2, 28.9)   | 68 (40, 99)<br>20 (12, 29.2)      | 79 (49, 118)<br>12.4 (7.7, 18.5)     | 49 (33, 70)<br>11 (7, 15.6)         | 112 (45, 198)<br>8.4 (3.6, 14.9)      | 113 (48, 201)<br>6.9 (2.8, 12.1)               | 614 (488, 747)<br>11.9 (9, 13.8)                                                       |
|                             |                                      | <b>Race</b>                    |                                   |                                 |                      |                                    |                                  |                                     |                                    |                                     |                                   |                                      |                                     |                                       |                                                |                                                                                        |
|                             |                                      | White                          | <i>N deaths</i><br>% <i>HSTK</i>  | 8 (0, 18)<br>7.8 (0, 16.1)      | 0 (0, 0)<br>0 (0, 0) | 81 (43, 120)<br>28.1 (15.1, 41.5)  | 0 (0, 0)<br>0 (0, 0)             | 134 (65, 215)<br>15.5 (7.5, 24.9)   | 129 (65, 208)<br>15.4 (7.8, 24.9)  | 185 (49, 342)<br>11.8 (3.1, 21.8)   | 76 (2, 161)<br>5.7 (0.1, 12.2)    | 473 (309, 636)<br>21.7 (14.2, 29.2)  | 362 (250, 486)<br>17.4 (12, 23.3)   | 446 (192, 786)<br>7.8 (3.4, 13.8)     | 388 (161, 691)<br>4.5 (1.9, 8)                 | 2298 (1854, 2814)<br>9.6 (7.8, 11.8)                                                   |
|                             |                                      | Black                          | <i>N deaths</i><br>% <i>HSTK</i>  | 6 (3, 9)<br>12.4 (5.6, 21)      | 0 (0, 0)<br>0 (0, 0) | 44 (23, 66)<br>27.1 (14.5, 41)     | 38 (21, 57)<br>28.4 (15.9, 41.9) | 99 (52, 160)<br>20.4 (10.7, 32.8)   | 102 (57, 160)<br>22 (12.3, 34.4)   | 94 (43, 154)<br>16.3 (7.4, 26.5)    | 48 (23, 86)<br>10 (4.8, 17.7)     | 88 (58, 121)<br>24.7 (16.3, 34.3)    | 76 (51, 103)<br>19.2 (12.9, 25.9)   | 42 (18, 74)<br>10 (4.1, 17.5)         | 698 (585, 812)<br>6.3 (2.7, 11)                | 16 (13.4, 18.5)<br>16 (13.4, 18.5)                                                     |
|                             |                                      | Hispanic                       | <i>N deaths</i><br>% <i>HSTK</i>  | 8 (5, 13)<br>17.9 (10.1, 27.5)  | 0 (0, 0)<br>0 (0, 0) | 10 (0, 24)<br>7.1 (0, 17.3)        | 0 (0, 0)<br>0 (0, 0)             | 65 (35, 95)<br>24.4 (13.2, 35.6)    | 46 (25, 70)<br>25.9 (14, 39)       | 57 (31, 90)<br>19.3 (10.7, 30.7)    | 26 (15, 40)<br>14.3 (8.4, 21.8)   | 21 (6, 36)<br>10.7 (3.2, 18.2)       | 11 (0, 23)<br>4.5 (0, 9.4)          | 37 (15, 67)<br>10.2 (4.2, 18.2)       | 46 (21, 76)<br>8.3 (3.8, 13.8)                 | 331 (268, 404)<br>12.8 (10.4, 15.7)                                                    |
|                             |                                      | Other                          | <i>N deaths</i><br>% <i>HSTK</i>  | 6 (4, 9)<br>36.1 (22.4, 50.8)   | 0 (0, 0)<br>0 (0, 0) | 9 (3, 15)<br>18.7 (7.5, 32.6)      | 0 (0, 0)<br>0 (0, 0)             | 36 (19, 54)<br>32.4 (17.5, 48.4)    | 33 (18, 49)<br>33.5 (18.4, 49.7)   | 48 (28, 73)<br>29.9 (17.4, 44.8)    | 36 (22, 52)<br>24.1 (14.5, 35)    | 64 (28, 108)<br>8.8 (4.2, 14.2)      | 14 (7, 23)<br>36.2 (15.9, 60.6)     | 41 (18, 72)<br>19.1 (12.7, 27)        | 48 (21, 90)<br>19.4 (15.6, 23.6)               | 341 (273, 415)<br>13.1 (10.1, 14.7)                                                    |
|                             |                                      | <b>Total</b>                   | <i>N deaths</i><br>% <i>HSTK</i>  | 21 (1, 41)<br>9.5 (0.4, 19)     | 0 (0, 0)<br>0 (0, 0) | 93 (40, 160)<br>14.7 (6.2, 25.2)   | 0 (0, 0)<br>0 (0, 0)             | 301 (162, 464)<br>17.4 (9.4, 26.9)  | 278 (148, 428)<br>17.6 (9.4, 27.1) | 433 (268, 626)<br>16.6 (10.3, 24.1) | 392 (232, 575)<br>18.4 (10.9, 27) | 534 (366, 742)<br>18.4 (12.6, 25.5)  | 518 (362, 686)<br>17.9 (12.5, 23.8) | 558 (247, 928)<br>8.2 (3.6, 13.6)     | 843 (350, 1429)<br>12.3 (10.1, 14.7)           | <b>4011 (3306, 4780)</b><br><b>M: 3505 (2619, 4475)</b><br><b>F: 4529 (3309, 6305)</b> |
| <b>Sodium<sup>h</sup></b>   | <b>Other Stroke</b>                  | <b>Overall by age</b>          | <i>N deaths</i>                   | 4 (1, 9)                        |                      | 34 (15, 56)                        |                                  | 307 (212, 413)                      |                                    | 902 (651, 1181)                     |                                   | 1877 (1462, 2317)                    |                                     | 5029 (3484, 6698)                     |                                                | <b>M: 11.3 (8.4, 14.4)</b><br><b>F: 9.6 (6.8, 13)</b>                                  |
| <b>(&gt;2000 mg/d)</b>      |                                      |                                | % <i>OStK</i>                     | 4.8 (0.8, 10.1)                 |                      | 8.3 (3.7, 13.9)                    |                                  | 17.4 (12, 23.4)                     |                                    | 17.6 (12.7, 23)                     |                                   | 18.2 (14.2, 22.5)                    |                                     | 8.1 (5.6, 10.8)                       |                                                | <b>M: 11.3 (8.4, 14.4)</b><br><b>F: 9.6 (6.8, 13)</b>                                  |
|                             |                                      | <b>Education</b>               |                                   |                                 |                      |                                    |                                  |                                     |                                    |                                     |                                   |                                      |                                     |                                       |                                                |                                                                                        |
|                             |                                      | <High-school                   | <i>N deaths</i><br>% <i>OStK</i>  | 1 (0, 2)<br>7.9 (0.9, 16)       | 0 (0, 0)<br>0 (0, 0) | 10 (5, 15)<br>23.8 (12.6, 36.9)    | 11 (6, 16)<br>23.9 (13.4, 35.6)  | 19 (2, 40)<br>7.3 (0.8, 15.2)       | 12 (2, 28)<br>7.3 (0.9, 16.4)      | 126 (80, 175)<br>19 (12.1, 26.5)    | 79 (51, 114)<br>18.9 (12.3, 27.3) | 78 (8, 149)<br>5.6 (0.5, 10.8)       | 57 (2, 111)<br>4.9 (0.1, 9.6)       | 488 (290, 723)<br>8.6 (5.1, 12.8)     | 724 (441, 1072)<br>6.7 (4.1, 9.9)              | 1612 (1252, 2034)<br>7.8 (6.1, 9.8)                                                    |
|                             |                                      | High-school                    | <i>N deaths</i><br>% <i>OStK</i>  | 5 (3, 7)<br>15.3 (8.1, 23.7)    | 0 (0, 0)<br>0 (0, 0) | 49 (28, 69)<br>29.7 (17.2, 42.3)   | 0 (0, 0)<br>0 (0, 0)             | 78 (34, 129)<br>11.8 (5.8, 19.7)    | 58 (28, 96)<br>21.3 (13.9, 29.2)   | 403 (263, 552)<br>21.4 (13.5, 30.2) | 296 (186, 417)<br>8.7 (4.8, 13.2) | 273 (151, 424)<br>8.2 (4.4, 12.5)    | 242 (126, 361)<br>8.4 (4.8, 12.3)   | 761 (436, 1195)<br>6.8 (4, 10)        | 1673 (967, 2454)<br>8.4 (6.6, 10.4)            | 3848 (3023, 4779)<br>10.9 (8.4, 12.9)                                                  |
|                             |                                      | College                        | <i>N deaths</i><br>% <i>OStK</i>  | 1 (1, 2)<br>21.7 (12.8, 31.9)   | 0 (0, 0)<br>0 (0, 0) | 6 (4, 9)<br>33.7 (19.9, 49)        | 0 (0, 0)<br>0 (0, 0)             | 18 (10, 27)<br>18.3 (10.6, 27.4)    | 11 (6, 18)<br>17.4 (9.1, 26.9)     | 80 (54, 114)<br>19.2 (12.9, 27.4)   | 48 (30, 69)<br>20.1 (12.4, 28.8)  | 109 (68, 154)<br>12.3 (7.6, 17.4)    | 60 (38, 85)<br>10.9 (7, 15.5)       | 296 (166, 484)<br>6.7 (3.8, 11)       | 396 (223, 610)<br>8.4 (4.7, 12.9)              | 1039 (789, 1321)<br>9.1 (6.9, 11.5)                                                    |
|                             |                                      | <b>Race</b>                    |                                   |                                 |                      |                                    |                                  |                                     |                                    |                                     |                                   |                                      |                                     |                                       |                                                |                                                                                        |
|                             |                                      | White                          | <i>N deaths</i><br>% <i>OStK</i>  | 2 (0, 4)<br>8 (0, 16.1)         | 0 (0, 0)<br>0 (0, 0) | 31 (18, 43)<br>27.5 (16.4, 39.1)   | 0 (0, 0)<br>0 (0, 0)             | 87 (52, 132)<br>15.7 (9, 24.6)      | 64 (37, 101)<br>11.7 (3.3, 20.9)   | 224 (64, 399)<br>19 (12.1, 26.5)    | 70 (0, 157)<br>5.6 (0, 12.5)      | 841 (581, 1134)<br>21.5 (14.8, 29)   | 582 (393, 768)<br>17.1 (11.7, 22.8) | 1315 (658, 2123)<br>4.3 (2.5, 6.7)    | 1472 (857, 2300)<br>7.5 (5.8, 9.3)             | 4747 (3674, 5871)<br>11.6 (9.80, 13.45)                                                |
|                             |                                      | Black                          | <i>N deaths</i><br>% <i>OStK</i>  | 2 (1, 3)<br>12.4 (5.6, 20.4)    | 0 (0, 0)<br>0 (0, 0) | 21 (13, 32)<br>27.5 (16.4, 40.4)   | 19 (9, 23)<br>28.8 (16, 41.2)    | 59 (34, 87)<br>20.1 (11.5, 29.7)    | 51 (29, 77)<br>21.8 (12.3, 33.1)   | 126 (65, 199)<br>16.1 (8.3, 25.4)   | 58 (26, 94)<br>10.2 (4.5, 16.4)   | 263 (175, 347)<br>24.7 (16.5, 32.6)  | 165 (113, 224)<br>19.1 (13, 25.8)   | 177 (102, 268)<br>9.9 (5.7, 15)       | 216 (127, 325)<br>149 (83, 222)                | 1161 (980, 1345)<br>430 (338, 538)                                                     |
|                             |                                      | Hispanic                       | <i>N deaths</i><br>% <i>OStK</i>  | 1 (1, 2)<br>17.9 (10.7, 27.3)   | 0 (0, 0)<br>0 (0, 0) | 2 (0, 6)<br>7.3 (0, 16.4)          | 0 (0, 0)<br>0 (0, 0)             | 24 (14, 35)<br>19.2 (11.4, 35.2)    | 16 (10, 24)<br>25.5 (15, 38.2)     | 45 (26, 67)<br>19.2 (11.1, 28.8)    | 23 (13, 34)<br>14.2 (8.1, 21.6)   | 38 (11, 62)<br>4.3 (0, 9.5)          | 12 (0, 27)<br>8.4 (3.2, 17.2)       | 116 (63, 189)<br>10.7 (6, 18.2)       | 149 (83, 222)<br>8.4 (4.7, 12.5)               | 430 (338, 538)<br>10.3 (8.1, 12.9)                                                     |
|                             |                                      | Other                          | <i>N deaths</i><br>% <i>OStK</i>  | 0 (0, 0)<br>4 (1, 9)            | 0 (0, 0)<br>0 (0, 0) | 2 (1, 3)<br>18.3 (7.8, 32.4)       | 0 (0, 0)<br>0 (0, 0)             | 21 (12, 30)<br>32.2 (18.8, 46.5)    | 11 (6, 17)<br>33.3 (18.6, 49.5)    | 42 (27, 60)<br>30 (19.1, 43.5)      | 21 (13, 29)<br>24.4 (15.3, 34.6)  | 91 (43, 147)<br>35.8 (16.8, 58.2)    | 18 (8, 28)<br>8.6 (4.1, 13.7)       | 99 (51, 163)<br>13.1 (6.7, 21.4)      | 123 (62, 214)<br>3266 (2029, 4860)             | 432 (330, 548)<br>15.9 (12.1, 20.2)                                                    |
|                             |                                      | <b>Total</b>                   | <i>N deaths</i><br>% <i>OStK</i>  | 4 (1, 9)<br>9.4 (1.5, 19.6)     | 0 (0, 0)<br>0 (0, 0) | 34 (15, 56)<br>14.5 (6.5, 24.2)    | 0 (0, 0)<br>0 (0, 0)             | 177 (103, 262)<br>17.3 (10.1, 25.6) | 130 (71, 193)<br>17.5 (9.6, 26)    | 517 (327, 741)<br>16.9 (10.7, 24.2) | 382 (243, 538)<br>18.4 (11.7, 26) | 849 (588, 1104)<br>18.5 (12.6, 24.7) | 1731 (982, 2608)<br>8.2 (4.6, 12.3) | 5029 (3484, 6698)<br>10.2 (8.3, 12.6) | <b>8131 (6580, 10023)</b><br><b>M: 35917 (</b> |                                                                                        |

**eTable 14. Absolute and proportional cardiometabolic disease mortality associated with suboptimal dietary habits in the US in 2012 by population subgroups (continued)**

| Dietary Factor <sup>a</sup> | Cardiometabolic Disease <sup>b</sup> | Population strata <sup>c</sup> | Associated mortality <sup>d</sup> | Age               |                   |                   |                   |                   |                   |                   |                   |                    |                   |                      |                      | Total (25+ y) (95% UIs)     |
|-----------------------------|--------------------------------------|--------------------------------|-----------------------------------|-------------------|-------------------|-------------------|-------------------|-------------------|-------------------|-------------------|-------------------|--------------------|-------------------|----------------------|----------------------|-----------------------------|
|                             |                                      |                                |                                   | 25-34 y           |                   | 35-44 y           |                   | 45-54 y           |                   | 55-64 y           |                   | 65-74 y            |                   | 75+ y                |                      |                             |
|                             |                                      |                                |                                   | Males (95% UIs)   | Females (95% UIs) | Males (95% UIs)    | Females (95% UIs) | Males (95% UIs)      | Females (95% UIs)    |                             |
|                             |                                      |                                | % CMD                             | 15.6 (12.3, 19.4) | 0 (0, 0)          | 24.9 (18.4, 31.2) | 0 (0, 0)          | 13.2 (9.3, 17.4)  | 12.7 (9.9, 15.7)  | 14.1 (10.8, 18.2) | 14.3 (11.3, 17.5) | 8.9 (6.8, 11.6)    | 8 (6.4, 9.6)      | 6.5 (4.4, 9)         | 8.1 (6, 10.8)        | 8.7 (7.6, 10)               |
|                             |                                      | Race                           |                                   |                   |                   |                   |                   |                   |                   |                   |                   |                    |                   |                      |                      |                             |
|                             |                                      | White                          | <i>N deaths</i>                   | 70 (40, 114)      | 0 (0, 0)          | 960 (696, 1286)   | 0 (0, 0)          | 2168 (1483, 3053) | 883 (665, 1144)   | 3479 (1889, 5376) | 721 (336, 1160)   | 8573 (6572, 10519) | 3998 (3268, 4748) | 11308 (7411, 16359)  | 8916 (6488, 11795)   | 41208 (35562, 48103)        |
|                             |                                      |                                | % CMD                             | 5.2 (3, 8.5)      | 0 (0, 0)          | 19.4 (14.1, 26)   | 0 (0, 0)          | 11.2 (7.7, 15.8)  | 10.9 (8.2, 14.1)  | 8.4 (4.5, 12.9)   | 4 (1.8, 6.4)      | 15.8 (12.1, 19.4)  | 12.5 (10.2, 14.9) | 7.1 (4.6, 10.2)      | 4.2 (3.1, 5.6)       | 7.5 (6.4, 8.7)              |
|                             |                                      | Black                          | <i>N deaths</i>                   | 53 (39, 71)       | 0 (0, 0)          | 413 (317, 508)    | 242 (198, 284)    | 884 (678, 1125)   | 601 (472, 725)    | 1265 (906, 1681)  | 473 (347, 623)    | 1783 (1443, 2084)  | 1041 (865, 1215)  | 1331 (922, 1796)     | 1353 (995, 1828)     | 9447 (8646, 10351)          |
|                             |                                      |                                | % CMD                             | 8.7 (6.3, 11.6)   | 0 (0, 0)          | 20 (15.4, 24.6)   | 20.9 (17.2, 24.6) | 15 (11.5, 19.1)   | 16.4 (12.9, 19.8) | 12.2 (8.7, 16.2)  | 7.3 (5.4, 9.6)    | 18.3 (14.8, 21.4)  | 13.7 (11.4, 16)   | 9.6 (6.7, 13)        | 5.9 (4.4, 8)         | 11.2 (10.2, 12.2)           |
|                             |                                      | Hispanic                       | <i>N deaths</i>                   | 41 (32, 50)       | 0 (0, 0)          | 53 (28, 83)       | 0 (0, 0)          | 415 (303, 544)    | 182 (143, 222)    | 557 (408, 750)    | 193 (146, 243)    | 333 (182, 471)     | 90 (42, 142)      | 896 (597, 1273)      | 973 (682, 1314)      | 3754 (3281, 4303)           |
|                             |                                      |                                | % CMD                             | 12.5 (9.7, 15.2)  | 0 (0, 0)          | 5.3 (2.8, 8.3)    | 0 (0, 0)          | 16.6 (12.1, 21.7) | 17.3 (13.6, 21)   | 13.3 (9.7, 17.9)  | 9.2 (7, 11.6)     | 7.3 (4, 10.3)      | 2.9 (1.4, 4.6)    | 9.2 (6.1, 13.1)      | 7.6 (5.3, 10.3)      | 9 (7.8, 10.3)               |
|                             |                                      | Other                          | <i>N deaths</i>                   | 34 (26, 43)       | 0 (0, 0)          | 58 (37, 86)       | 0 (0, 0)          | 275 (197, 359)    | 107 (82, 133)     | 459 (346, 586)    | 173 (137, 216)    | 648 (418, 932)     | 102 (72, 132)     | 695 (480, 999)       | 712 (504, 1001)      | 3288 (2839, 3788)           |
|                             |                                      |                                | % CMD                             | 26 (20, 32.2)     | 0 (0, 0)          | 12.9 (8.2, 19)    | 0 (0, 0)          | 22.2 (15.9, 29)   | 22.5 (17.2, 28)   | 21.3 (16, 27.1)   | 16.1 (12.8, 20.1) | 25.6 (16.5, 36.8)  | 6.1 (4.3, 7.8)    | 12.2 (8.4, 17.5)     | 10.1 (7.2, 14.2)     | 14.5 (12.5, 16.7)           |
|                             |                                      | <b>Total</b>                   | <i>N deaths</i>                   | 153 (87, 233)     | 0 (0, 0)          | 873 (611, 1193)   | 0 (0, 0)          | 3608 (2625, 4717) | 1636 (1267, 2046) | 7066 (5406, 9010) | 3550 (2824, 4355) | 9539 (7613, 11586) | 5712 (4717, 6684) | 14643 (10060, 20405) | 19293 (14035, 25570) | <b>66508 (58500, 74840)</b> |
|                             |                                      |                                | % CMD                             | 6.3 (3.6, 9.7)    | 0 (0, 0)          | 10.3 (7.2, 14.1)  | 0 (0, 0)          | 12.4 (9.1, 16.3)  | 12.3 (9.5, 15.4)  | 12.1 (9.3, 15.5)  | 12.8 (10.2, 15.7) | 13.4 (10.7, 16.3)  | 12.9 (10.7, 15.1) | 7.7 (5.3, 10.8)      | 7.6 (5.5, 10.1)      | <b>9.5 (8.3, 10.7)</b>      |

<sup>a</sup> Dietary factors with probable or convincing evidence, based on criteria for assessing causality,<sup>11,13,14,86</sup> for etiologic relationships with cardiometabolic outcomes including coronary heart disease (CHD), stroke, type 2 diabetes, body mass index (BMI), or systolic blood pressure (SBP).<sup>9,10</sup>

<sup>b</sup> Disease-specific deaths were obtained from the National Center for Health Statistics (NCHS) ([http://www.cdc.gov/nchs/data\\_access/Vitalstatsonline.htm](http://www.cdc.gov/nchs/data_access/Vitalstatsonline.htm)); uncertainty in the baseline number of deaths is not reported in NCHS. Deaths were excluded if in foreign residents (individuals dying in the US but whose place of residence is outside the US), at age<25y, with missing age information (2012: 0.005%; 2002: 0.006%), or, in education-stratified analyses, with missing education information (2012: 2.1%; 2002: 6.2%). For this analysis, we used data on deaths due to diet-related cardiometabolic diseases including **coronary heart disease (CHD)**: I20-I25; **Ischemic stroke (ISTK)**: I63, I65-I67 (except I67.4), I69.3, G45; **Hemorrhagic stroke (HSTK)**: I60-I62, I69.0-I69.2, I67.4; **Other stroke (OSTK)**, unclassified stroke or sequelae of stroke, not specified as haemorrhage or infarction: I64, I69.4, I69.8; **Diabetes**: E10-E14 (except E10.2, E11.2, E12.2, E13.2); and **other cardiovascular diseases (other CVD)** including hypertensive heart disease (I11), rheumatic heart disease (I01, I02.0, I05-I09), cardiomyopathy and myocarditis (I42, I40), atrial fibrillation and flutter (I48), aortic aneurysm (I71), peripheral vascular disease (I73, I70.2), endocarditis (I33), and other cardiovascular and circulatory diseases (I00, I02.9, I27-I28 (except I27.1), I30-I32 (except I31.2, I31.3), I34-I39, I47, I70.8, I72, I77-I80, I82-I84, I86-I98). Diabetes deaths are those coded as proximally due to diabetes, and diabetes is also separately a risk factor for CVD deaths along with other risk factors such as smoking, high blood pressure, high cholesterol, obesity, physical inactivity, etc.

<sup>c</sup> Population strata were assigned as follows: age (25-34, 35-44, 45-54, 55-64, 65-74, and ≥75 yrs), sex (male and female), education (<High-school: less than high school degree, High-school: high school degree/equivalent or some college, and College: ≥4-year college degree), and race (White: non-Hispanic White, Black: non-Hispanic Black, Hispanic: Mexican American/other Hispanic, and Other: other race/mixed race).

<sup>d</sup> We estimated the mortality (absolute, percent, with 95% uncertainty intervals (UIs)) associated with suboptimal intakes (reported in parenthesis) of dietary targets reported in this Table among US adults (≥25 yrs) using a comparative risk assessment framework,<sup>2,91</sup> incorporating nationally representative inputs and their uncertainty on (1) dietary exposure distributions, (2) etiologic relationships of these dietary factors with cardiometabolic mortality, (3) optimal intake distributions, and (4) observed total and disease-specific cardiometabolic deaths (see main Methods and eAppendix 1).

<sup>e</sup> Based on the joint (multiplicative) population attributable fraction<sup>91</sup> for the factors in this Table. We used polyunsaturated fats (PUFA) in place of saturated fats (SFA) rather than carbohydrates (Carbs) to be more conservative when estimating joint mortality. We excluded CHD estimates for processed meats because relationships may be mainly driven by sodium content;<sup>38,92</sup> and for SFA replacing PUFA because these are already incorporated into estimates for PUFA.

<sup>f</sup> Available evidence suggests that SSBs are associated with increased cardiometabolic risk through relationships with BMI and additional BMI-independent relationships with CHD, hypertensive heart disease, and type 2 diabetes (see eAppendix 1, eTable 5).<sup>5,6</sup> Because of this, in this Table we separate deaths due to hypertensive heart disease (associated with both BMP and BP) from those due to other CVD (associated with BP but not BMI).

<sup>g</sup> Estimated RRs are nearly identical for polyunsaturated fats (PUFA) replacing carbohydrates (Carbs) or saturated fats (SFA). For comparison, in sensitivity analyses we also evaluated the estimated mortality associated with excess SFA in place of PUFA. PUFA in place of carbs is the same as PUFA in place of carbs or SFA.

<sup>h</sup> Available evidence suggests that sodium is associated with increased mortality from CHD, stroke, and other blood pressure (BP)-related cardiovascular diseases through effects on systolic BP.<sup>5,8</sup> For every year above or below age 50, there was 0.105 mm Hg (95% CI: 0.047, 0.164) larger or smaller BP reduction, respectively; we assumed no further increase in effect after age 70 due to limited trial evidence outside this age range. We assumed a log-linear dose-response between SBP and CVD until 115 mm Hg, below which we assumed no further lowering of risk (see eAppendix 1, eTable 5).<sup>8</sup>

## FIGURES

**Absolute Cardiometabolic Mortality Attributable to Dietary Habits in the US**

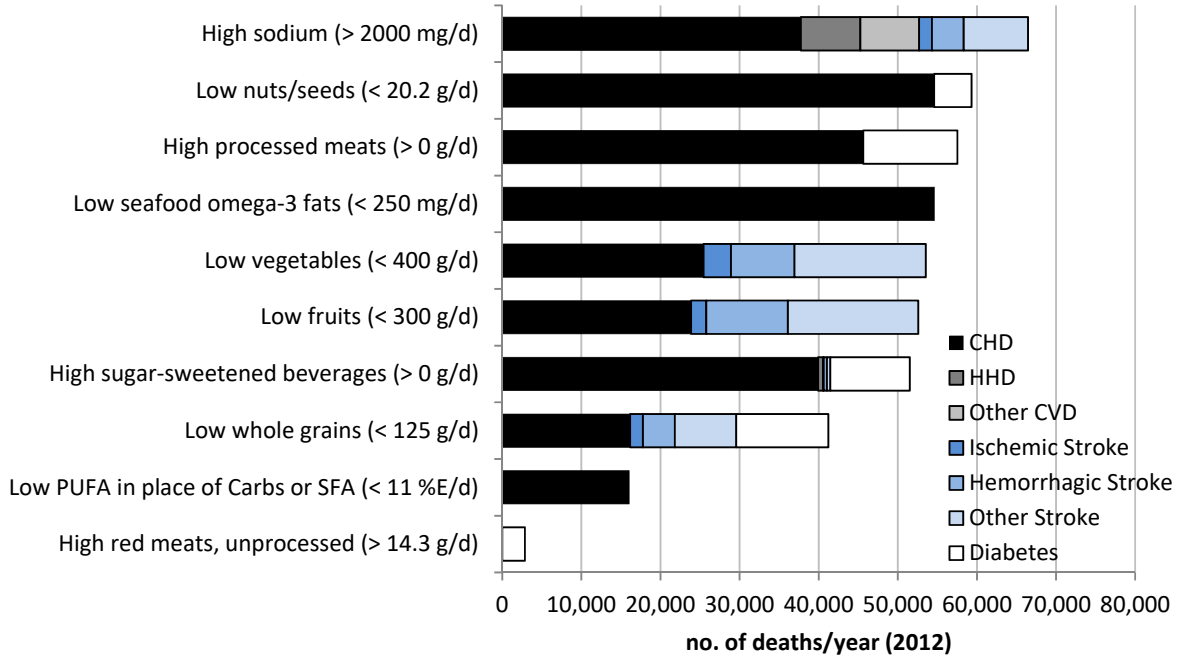

**Proportional Cardiometabolic Mortality Attributable to Dietary Habits in the US**

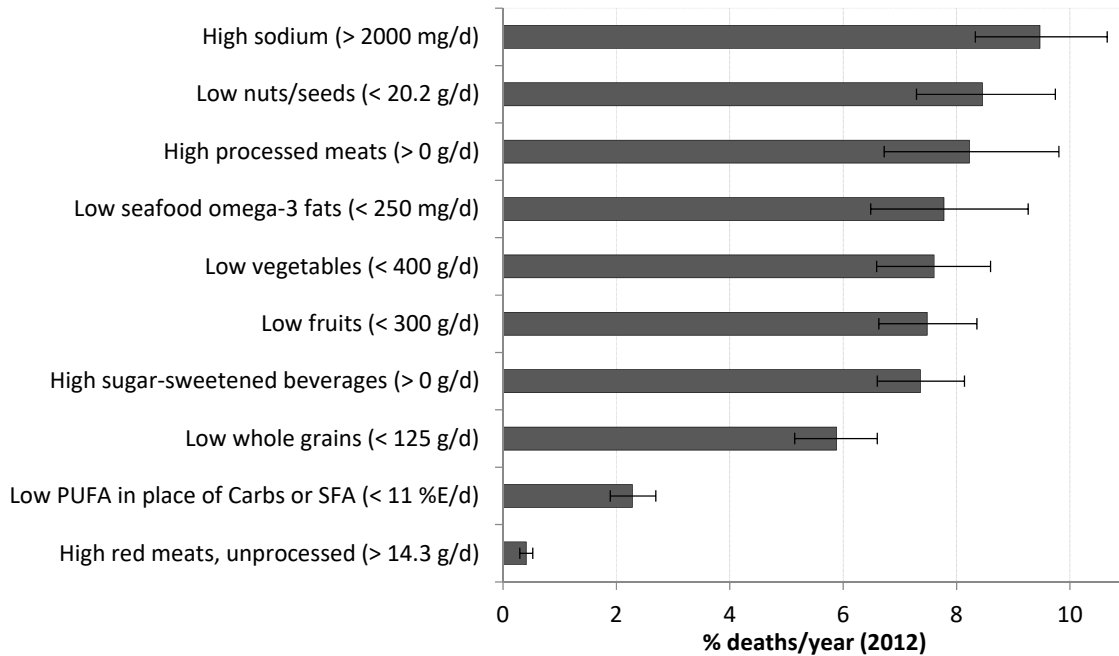

**eFigure 1. Absolute and proportional cardiometabolic disease mortality associated with suboptimal dietary habits among US adults in 2012.** The bars represent the estimated absolute (top panel) and percent (bottom panel) cardiometabolic deaths associated with 10 dietary factors, as compared with optimal intakes (values in parentheses); and the error bars, 95% uncertainty intervals. Estimated relationships are nearly identical for polyunsaturated fats (PUFA) replacing carbohydrates (Carbs) or saturated fats (SFA). For comparison, in sensitivity analyses we also evaluated the estimated mortality associated with excess SFA in place of PUFA. PUFA in place of carbs is the same as PUFA in place of carbs or SFA. CHD, coronary heart disease; CVD, cardiovascular disease; HHD, hypertensive heart disease



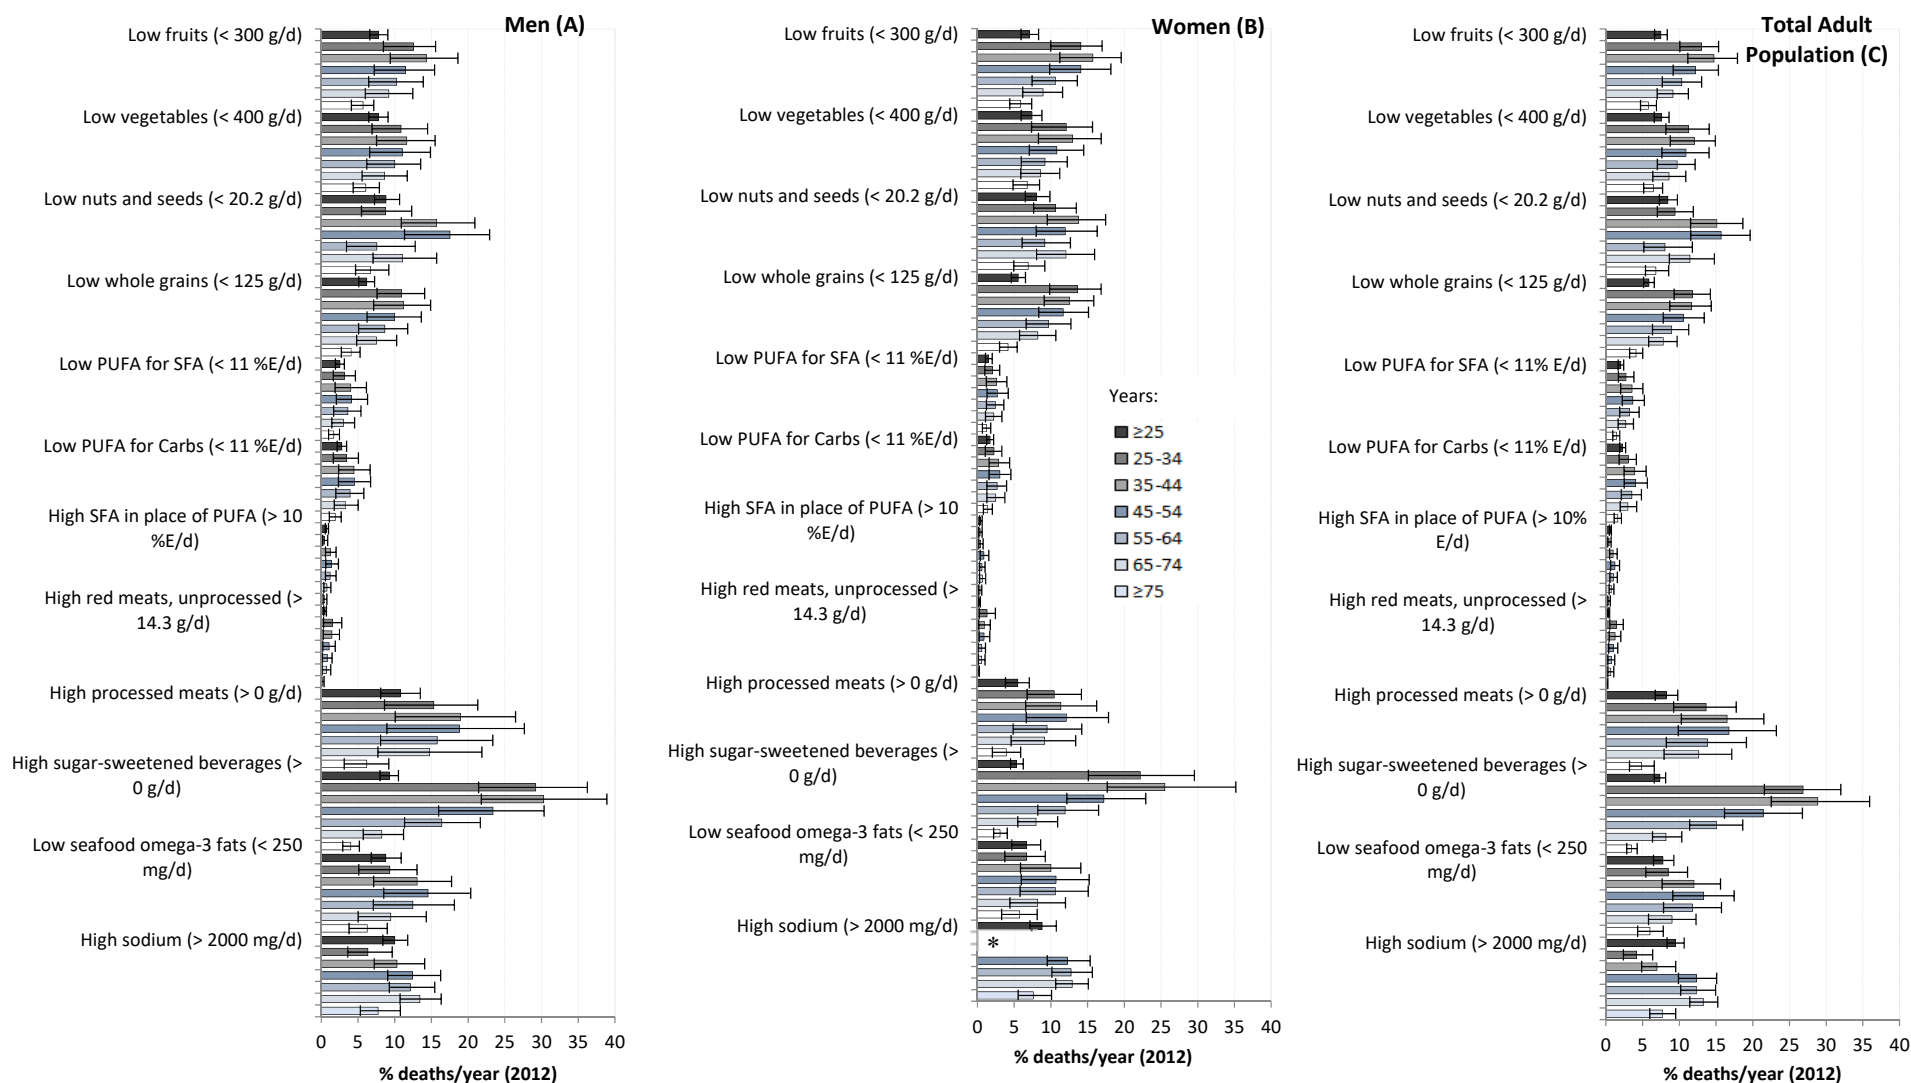

**eFigure 2. Proportional cardiometabolic disease mortality associated with suboptimal dietary habits in the US in 2012 by age.** The bars represent the estimated percent cardiometabolic deaths associated with 10 dietary factors among males (panel A) and females (panel B), and for total adult population (panel C) by age, as compared with optimal intakes (values in parentheses); and the error bars, 95% uncertainty intervals. Estimated relationships are nearly identical for polyunsaturated fats (PUFA) replacing carbohydrates (Carbs) or saturated fats (SFA). For comparison, in sensitivity analyses we also evaluated the estimated mortality associated with excess SFA in place of PUFA. PUFA in place of carbs is the same as PUFA in place of carbs or SFA.

\* Based on the evidence, we assumed a log-linear dose-response between systolic blood pressure and cardiovascular disease until a blood pressure level of 115 mm Hg, below which we assumed no further lowering of risk. Systolic blood pressure for females aged 25-34 and 35-44 years was <115 mm Hg.

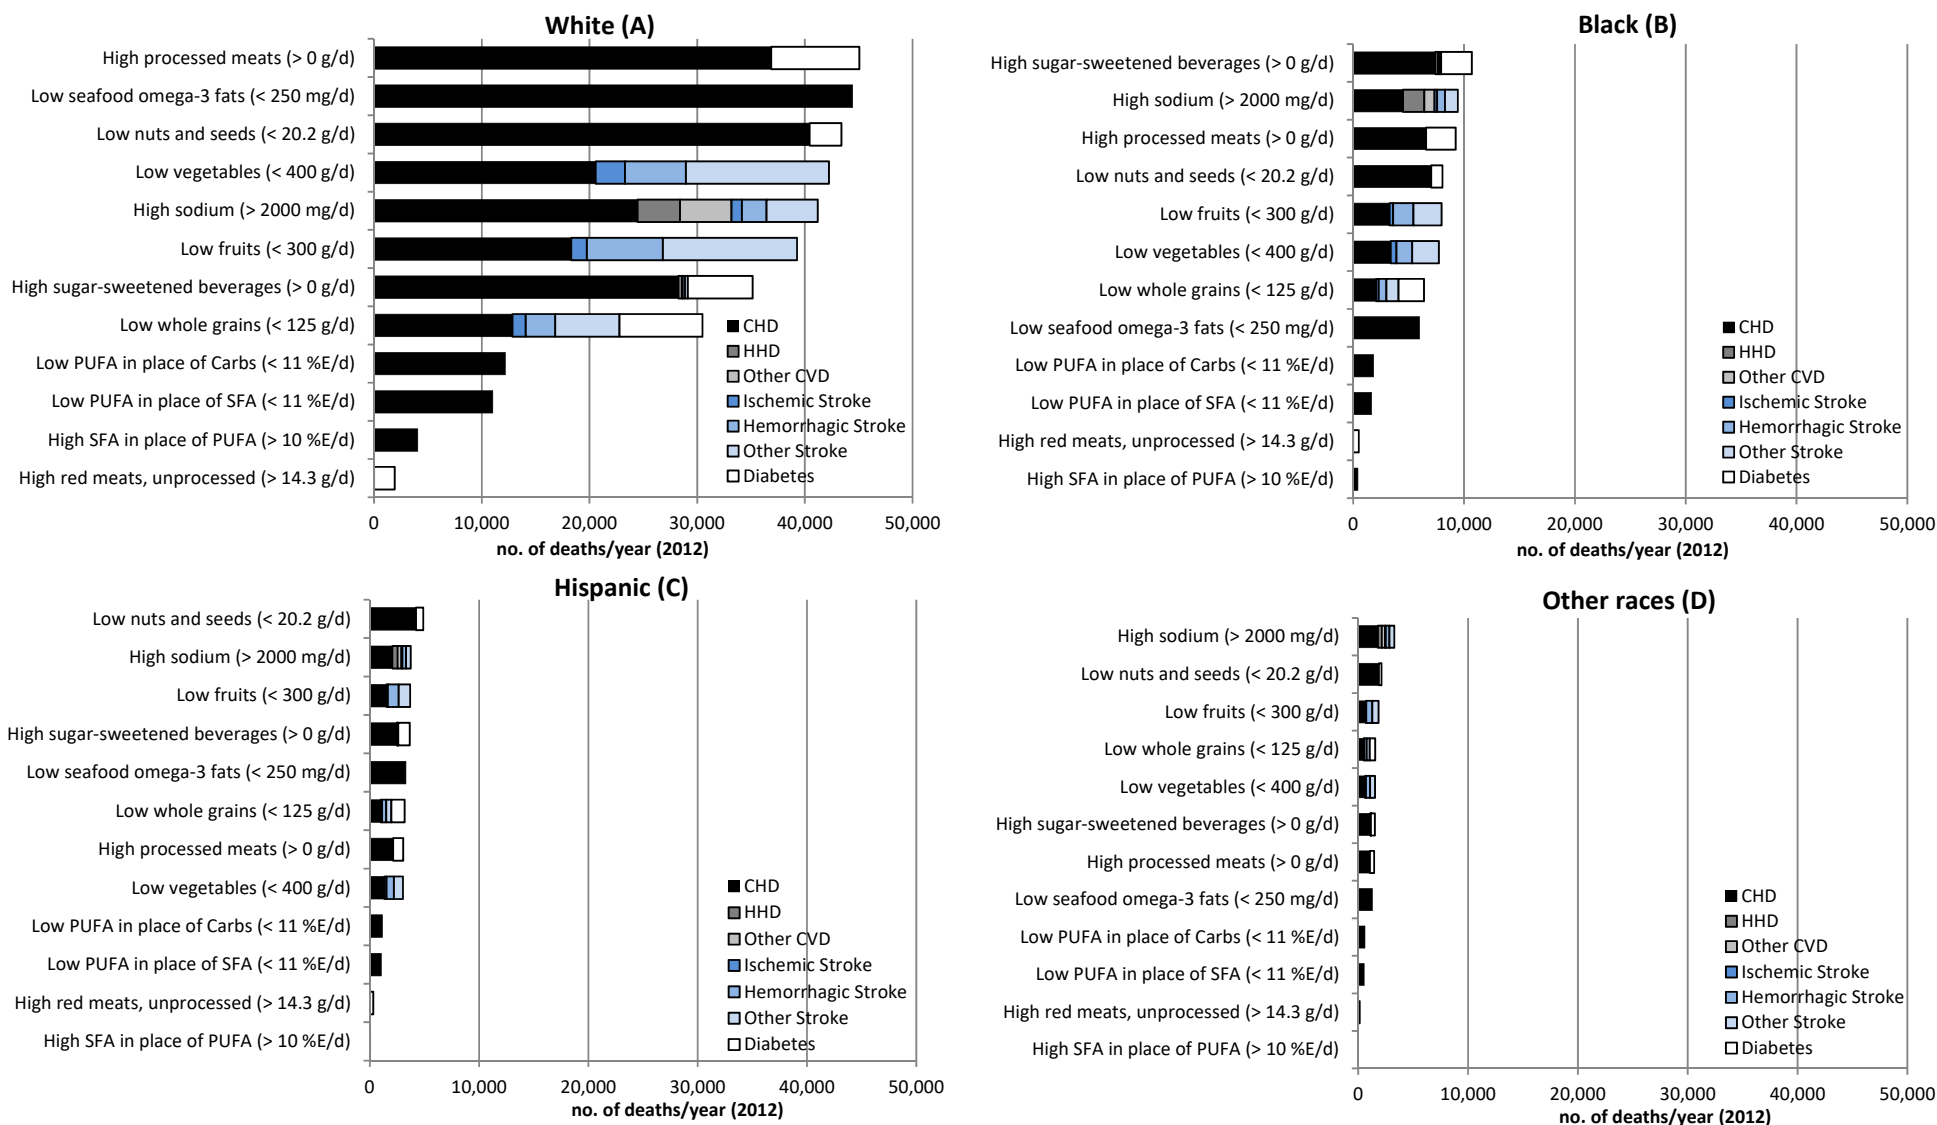

**Figure 3. Absolute cardiometabolic disease mortality associated with suboptimal dietary habits in the US in 2012 by race.** The bars represent absolute cardiometabolic deaths associated with 10 dietary factors among Whites (panel A), Blacks (panel B), Hispanics (panel C), and other races (panel D), as compared with optimal intakes (values in parentheses). Estimated relationships are nearly identical for polyunsaturated fats (PUFA) replacing carbohydrates (Carbs) or saturated fats (SFA). For comparison, in sensitivity analyses we also evaluated the estimated mortality associated with excess SFA in place of PUFA. PUFA in place of carbs is the same as PUFA in place of carbs or SFA. CHD, coronary heart disease; CVD, cardiovascular disease; HHD, hypertensive heart disease.

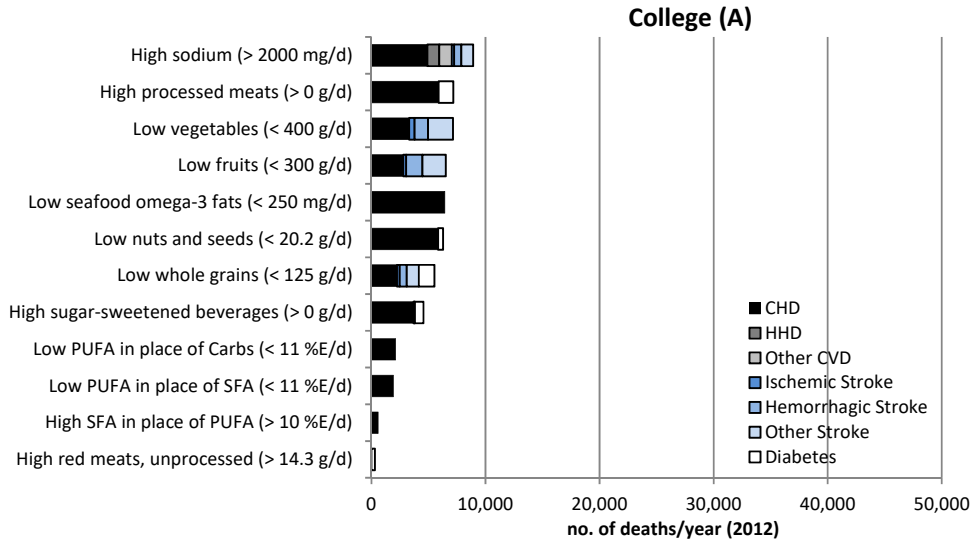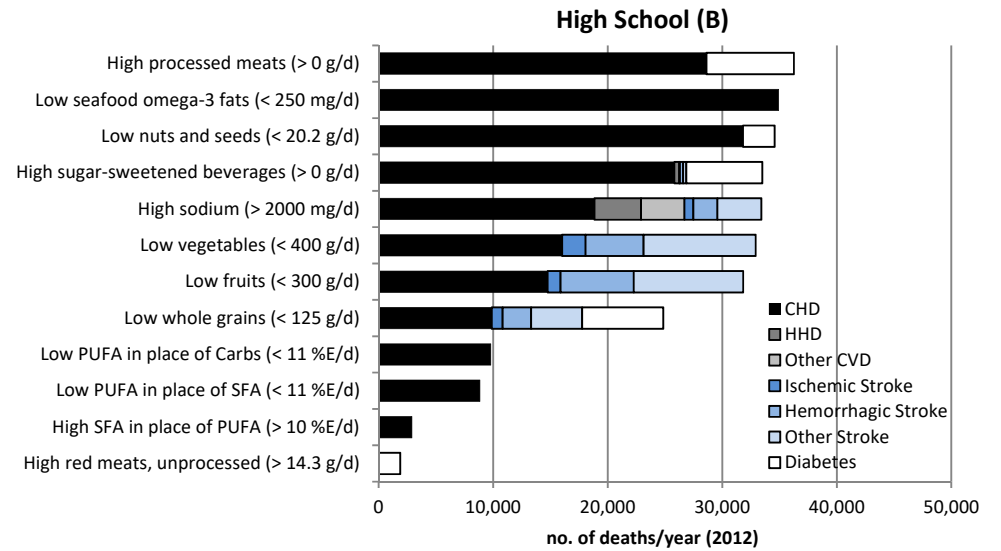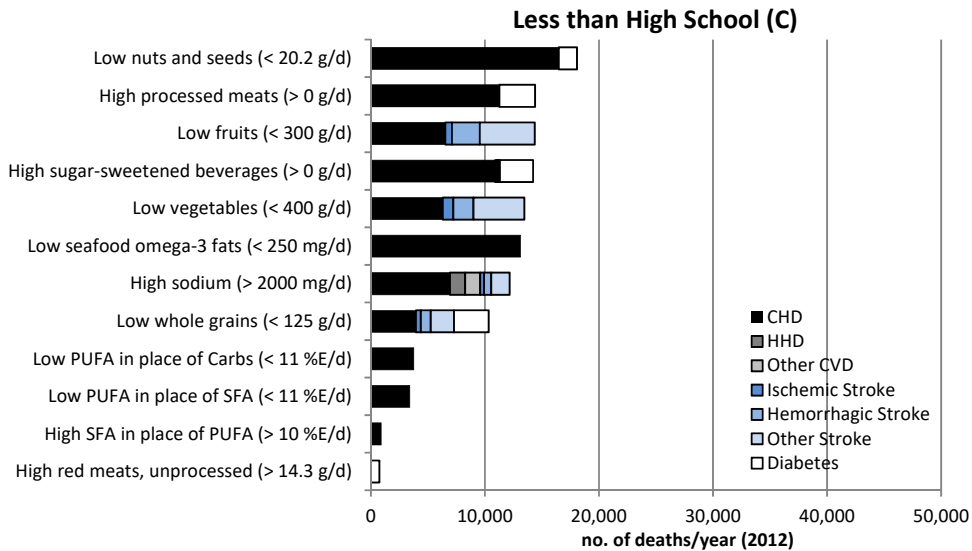

**Figure 4. Absolute cardiometabolic disease mortality associated with suboptimal dietary habits in the US in 2012 by education.** The bars represent absolute cardiometabolic deaths associated with 10 dietary factors among Americans of high (panel A), medium (panel B), and low education (panel C), as compared with optimal intakes (values in parentheses). Estimated relationships are nearly identical for polyunsaturated fats (PUFA) replacing carbohydrates (Carbs) or saturated fats (SFA). For comparison, in sensitivity analyses we also evaluated the estimated mortality associated with excess SFA in place of PUFA. PUFA in place of carbs is the same as PUFA in place of carbs or SFA. CHD, coronary heart disease; CVD, cardiovascular disease; HHD, hypertensive heart disease.

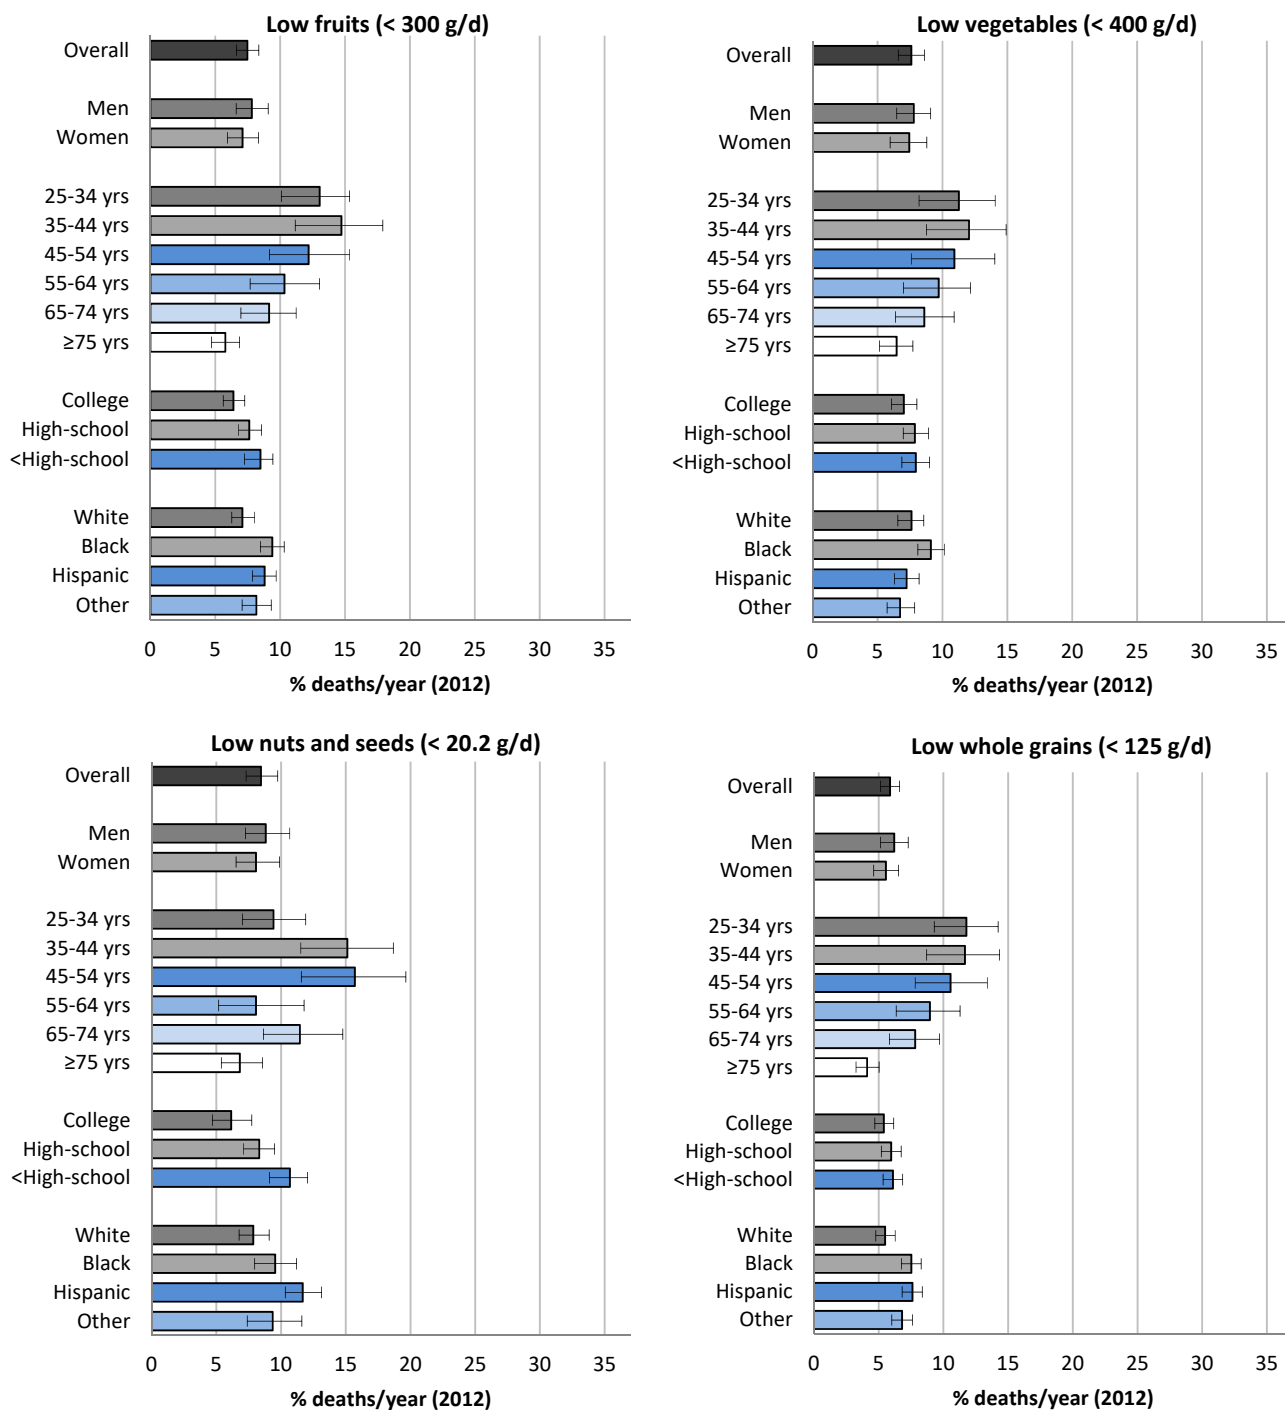

**eFigure 5. Proportional cardiometabolic disease mortality associated with suboptimal dietary habits in the US in 2012 by population subgroups.** The bars represent the estimated percent cardiometabolic deaths associated with 10 dietary factors overall and by population strata (sex, age, education, race), as compared with optimal intakes (values in parentheses); and the error bars, 95% uncertainty intervals. Estimated relationships are nearly identical for polyunsaturated fats (PUFA) replacing carbohydrates (Carbs) or saturated fats (SFA). For comparison, in sensitivity analyses we also evaluated the estimated mortality associated with excess SFA in place of PUFA. PUFA in place of carbs is the same as PUFA in place of carbs or SFA.

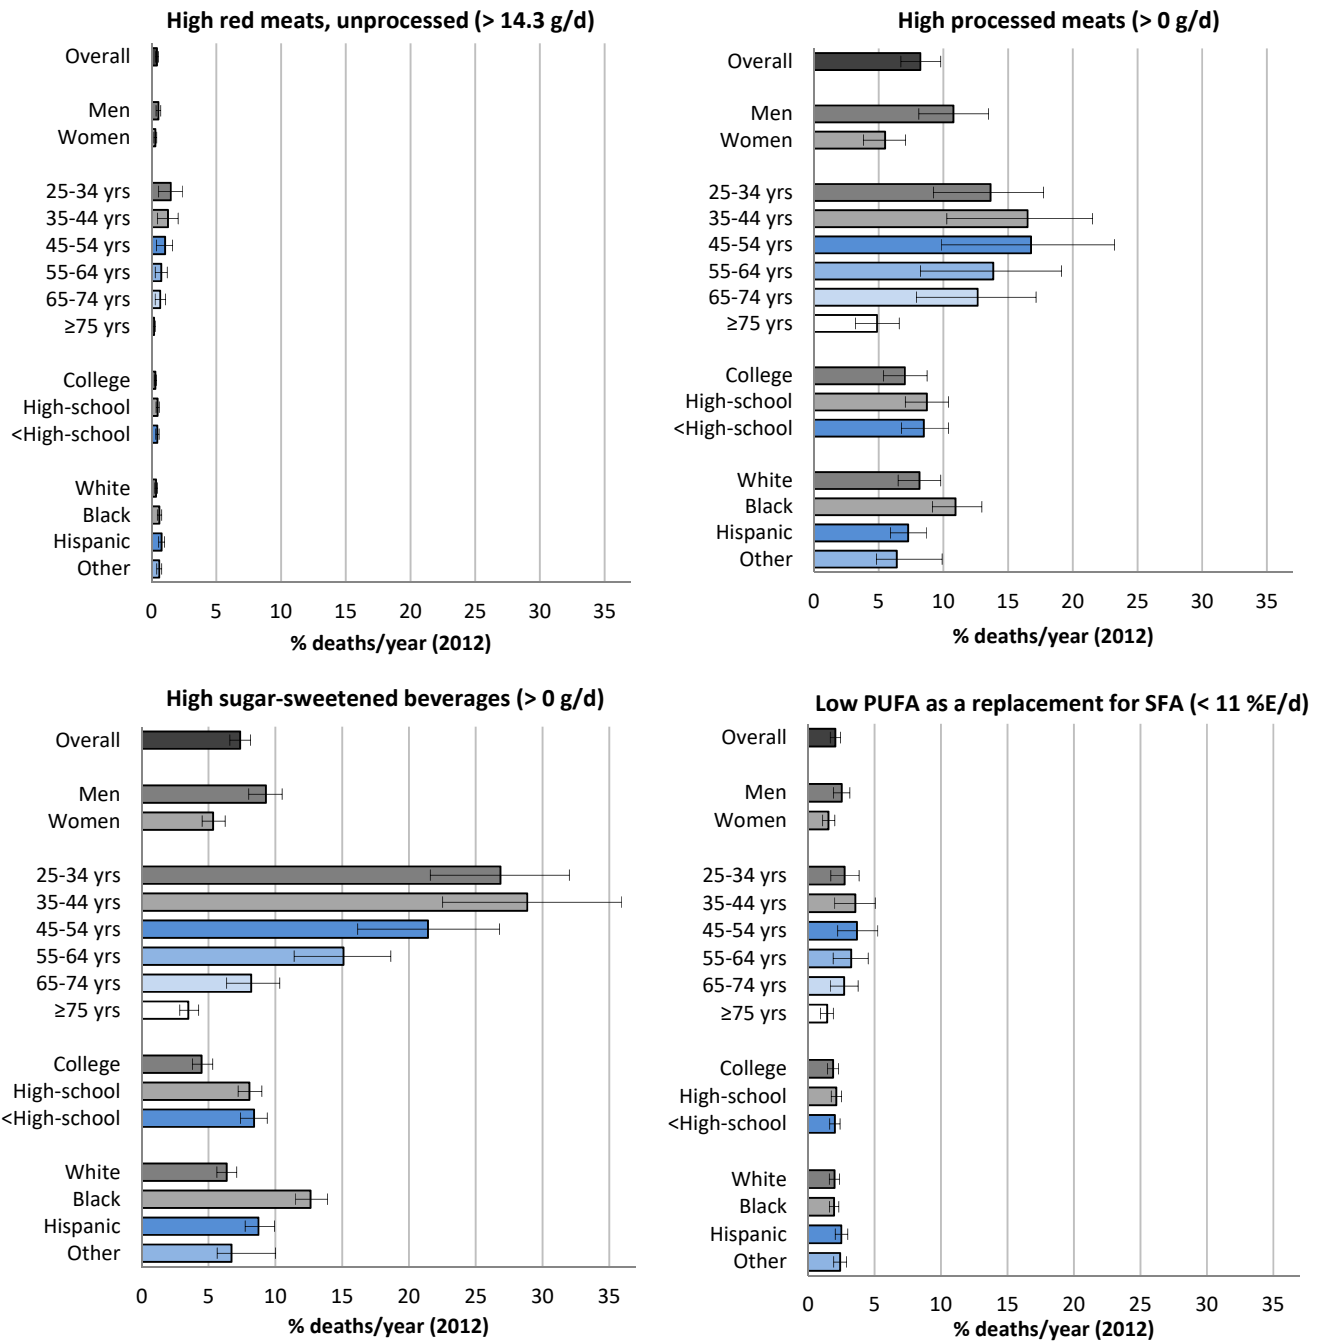

**eFigure 5. Proportional cardiometabolic disease mortality associated with suboptimal dietary habits in the US in 2012 by population subgroups (continued)**

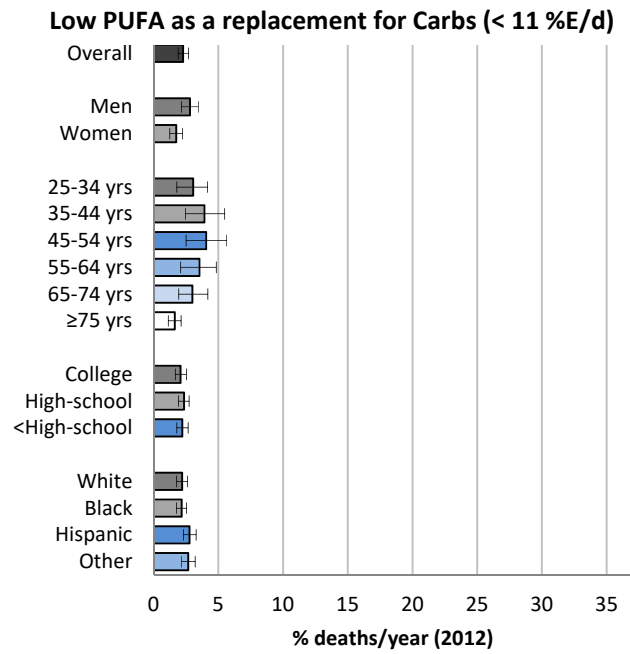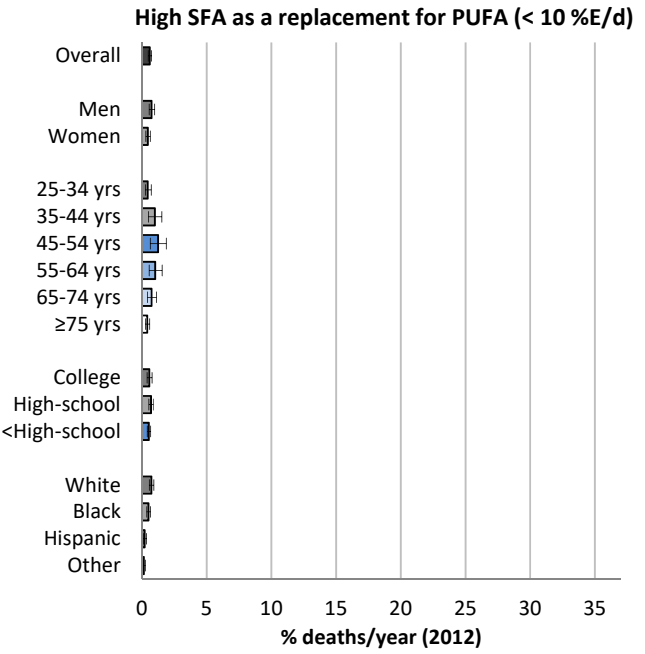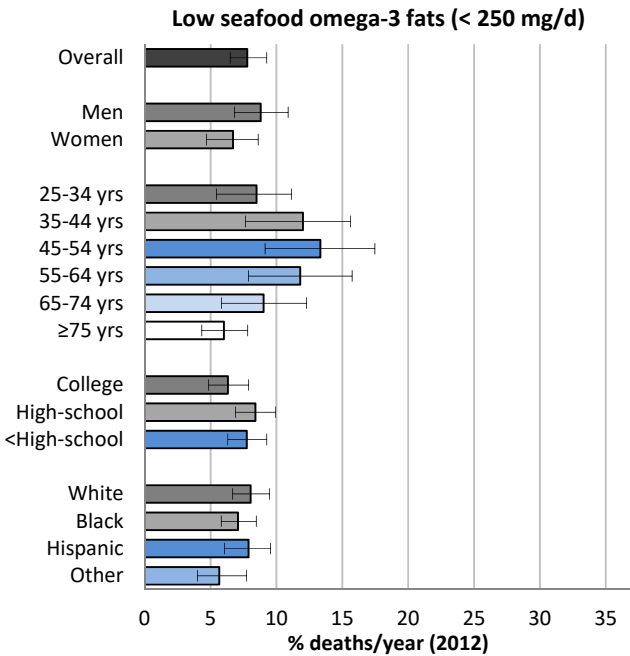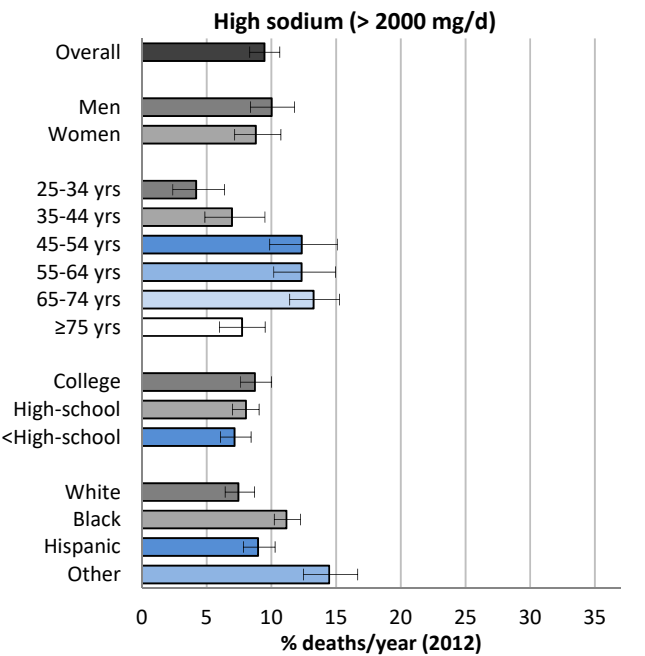

**eFigure 5. Proportional cardiometabolic disease mortality associated with suboptimal dietary habits in the US in 2012 by population subgroups (continued)**

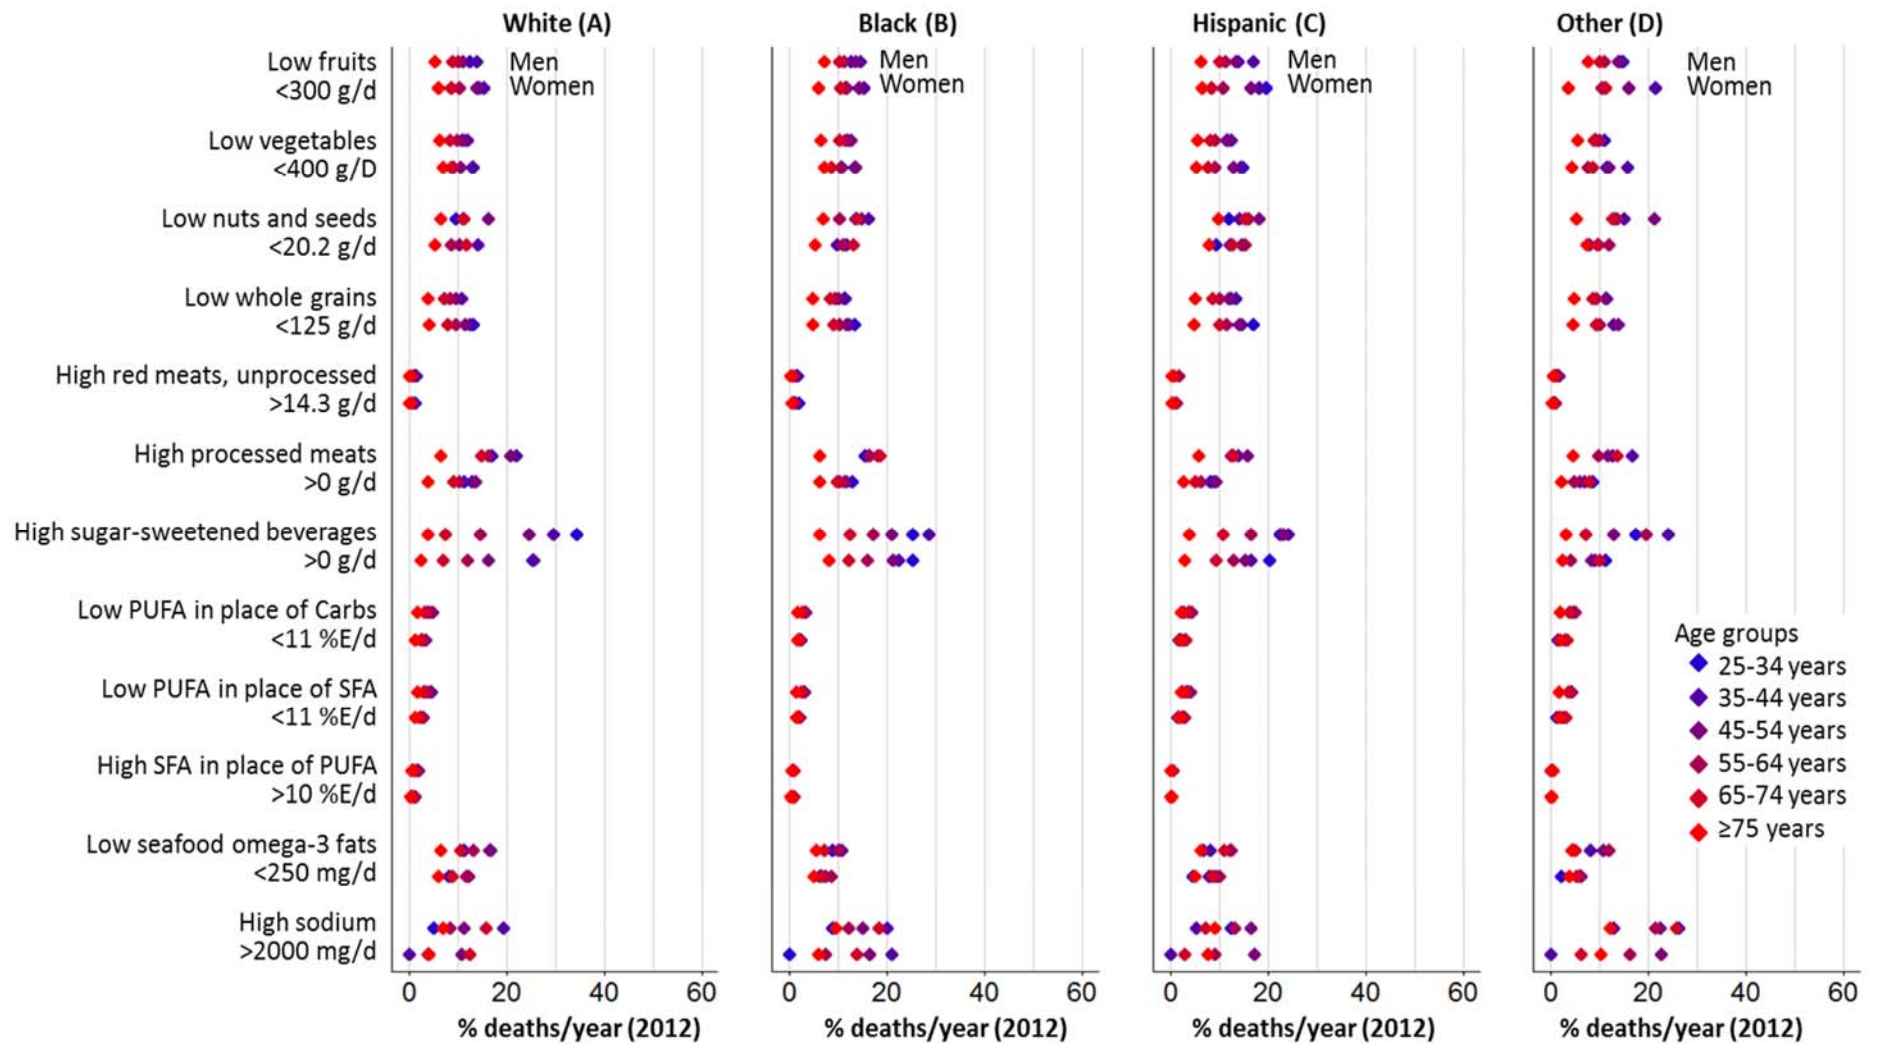

**eFigure 6. Proportional cardiometabolic disease mortality associated with suboptimal dietary habits in the US in 2012 by age, sex, and race.** The diamonds represent percent cardiometabolic deaths associated with 10 dietary factors by age and sex among Whites (panel A), Blacks (panel B), Hispanics (panel C), and other races (panel D), as compared with optimal intakes (values in parentheses). Estimated relationships are nearly identical for polyunsaturated fats (PUFA) replacing carbohydrates (Carbs) or saturated fats (SFA). For comparison, in sensitivity analyses we also evaluated the estimated mortality associated with excess SFA in place of PUFA. PUFA in place of carbs is the same as PUFA in place of carbs or SFA.

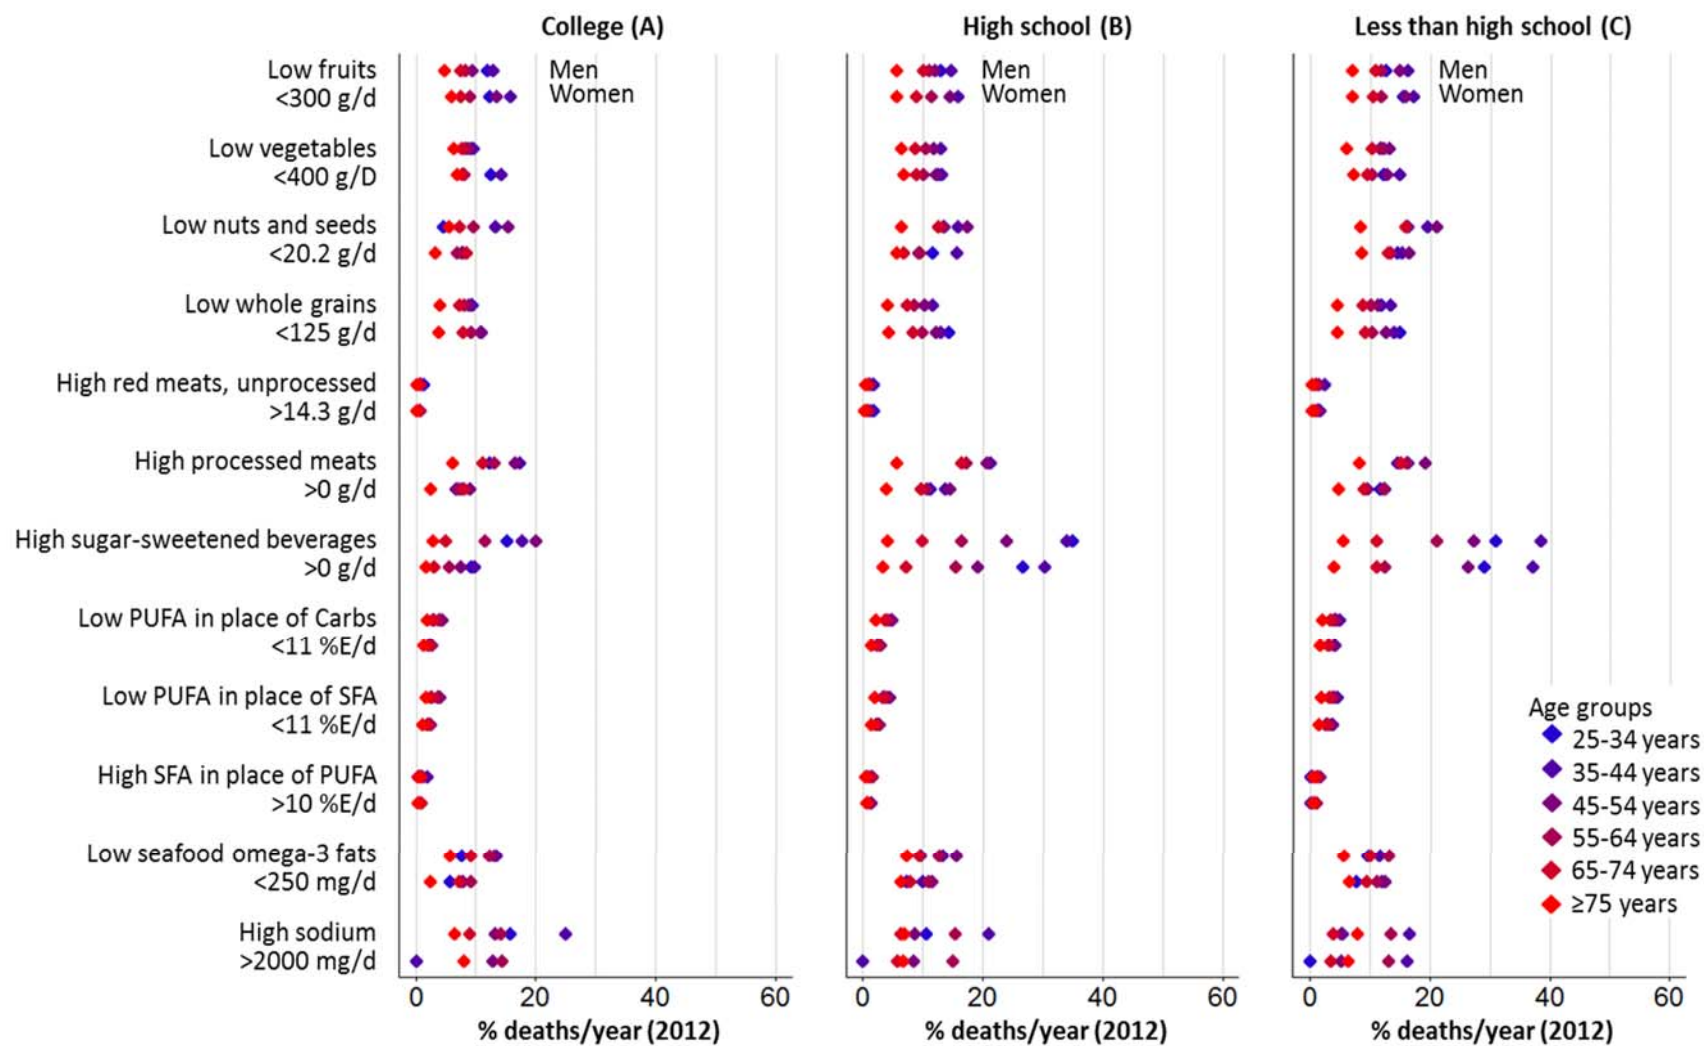

**eFigure 7. Proportional cardiometabolic disease mortality associated with suboptimal dietary habits in the US in 2012 by age, sex, and education.** The diamonds represent percent cardiometabolic deaths associated with 10 dietary factors by age and sex among Americans of high (panel A), medium (panel B), and low (panel C) education, as compared with optimal intakes (values in parentheses). Estimated relationships are nearly identical for polyunsaturated fats (PUFA) replacing carbohydrates (Carbs) or saturated fats (SFA). For comparison, in sensitivity analyses we also evaluated the estimated mortalities associated with excess SFA in place of PUFA. PUFA in place of carbs is the same as PUFA in place of carbs or SFA.



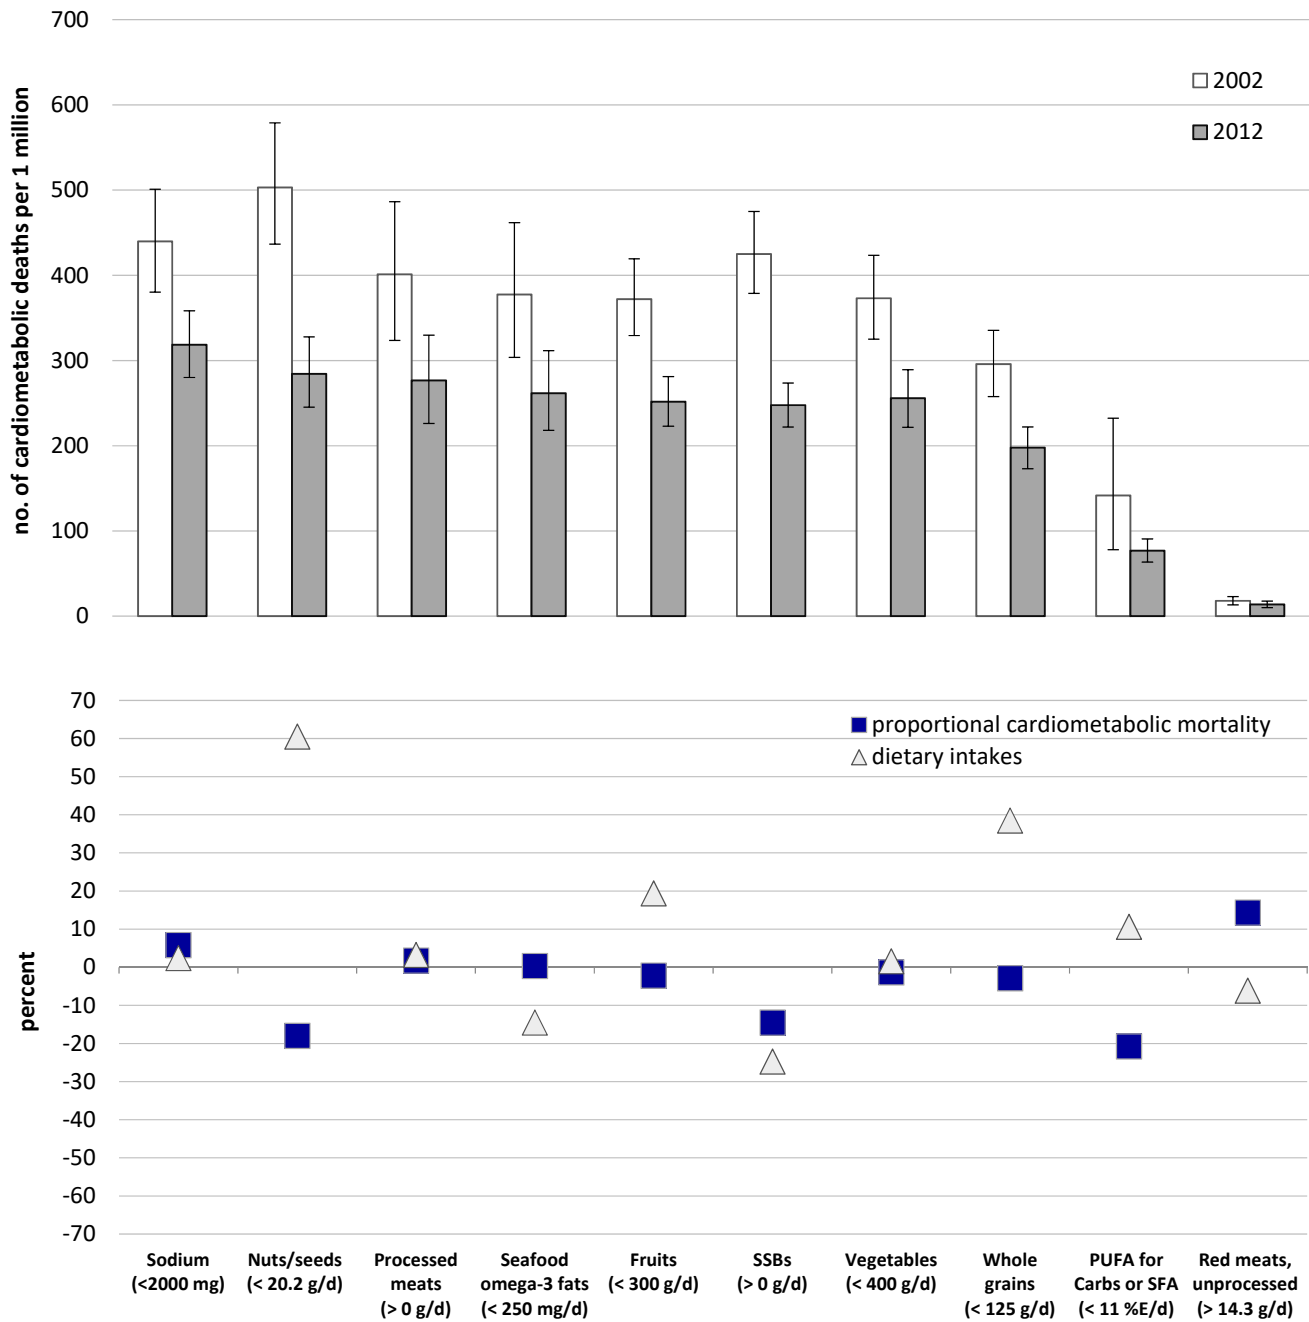

**eFigure 8. Cardiometabolic deaths per 1 million adults associated with dietary habits in the US in 2002 and 2012 and change in proportional cardiometabolic disease mortality and dietary intakes between 2002 and 2012.** The bars (top panel) represent the estimated cardiometabolic death rates associated with 10 dietary factors in 2002 and 2012, as compared with optimal intakes (values in parentheses); and the error bars, 95% uncertainty intervals. Death rates were age-sex standardized to account for changes in population structure (due to population growth and aging) by standardizing the 2002 population to 2012 population. The squares (bottom panel) represent the estimated relative changes in percent cardiometabolic deaths associated with 10 dietary factors between 2002 and 2012; and the triangles, the estimated relative changes in dietary intakes. These percent changes correspond to  $(2012_{estimates} - 2002_{estimates}) / 2002_{estimates} * 100$ . Changes in intakes for polyunsaturated fats (PUFA) replacing carbohydrates (Carbs) or saturated fats (SFA) reflect changes in consumption of PUFA. SSBs, sugar-sweetened beverages.

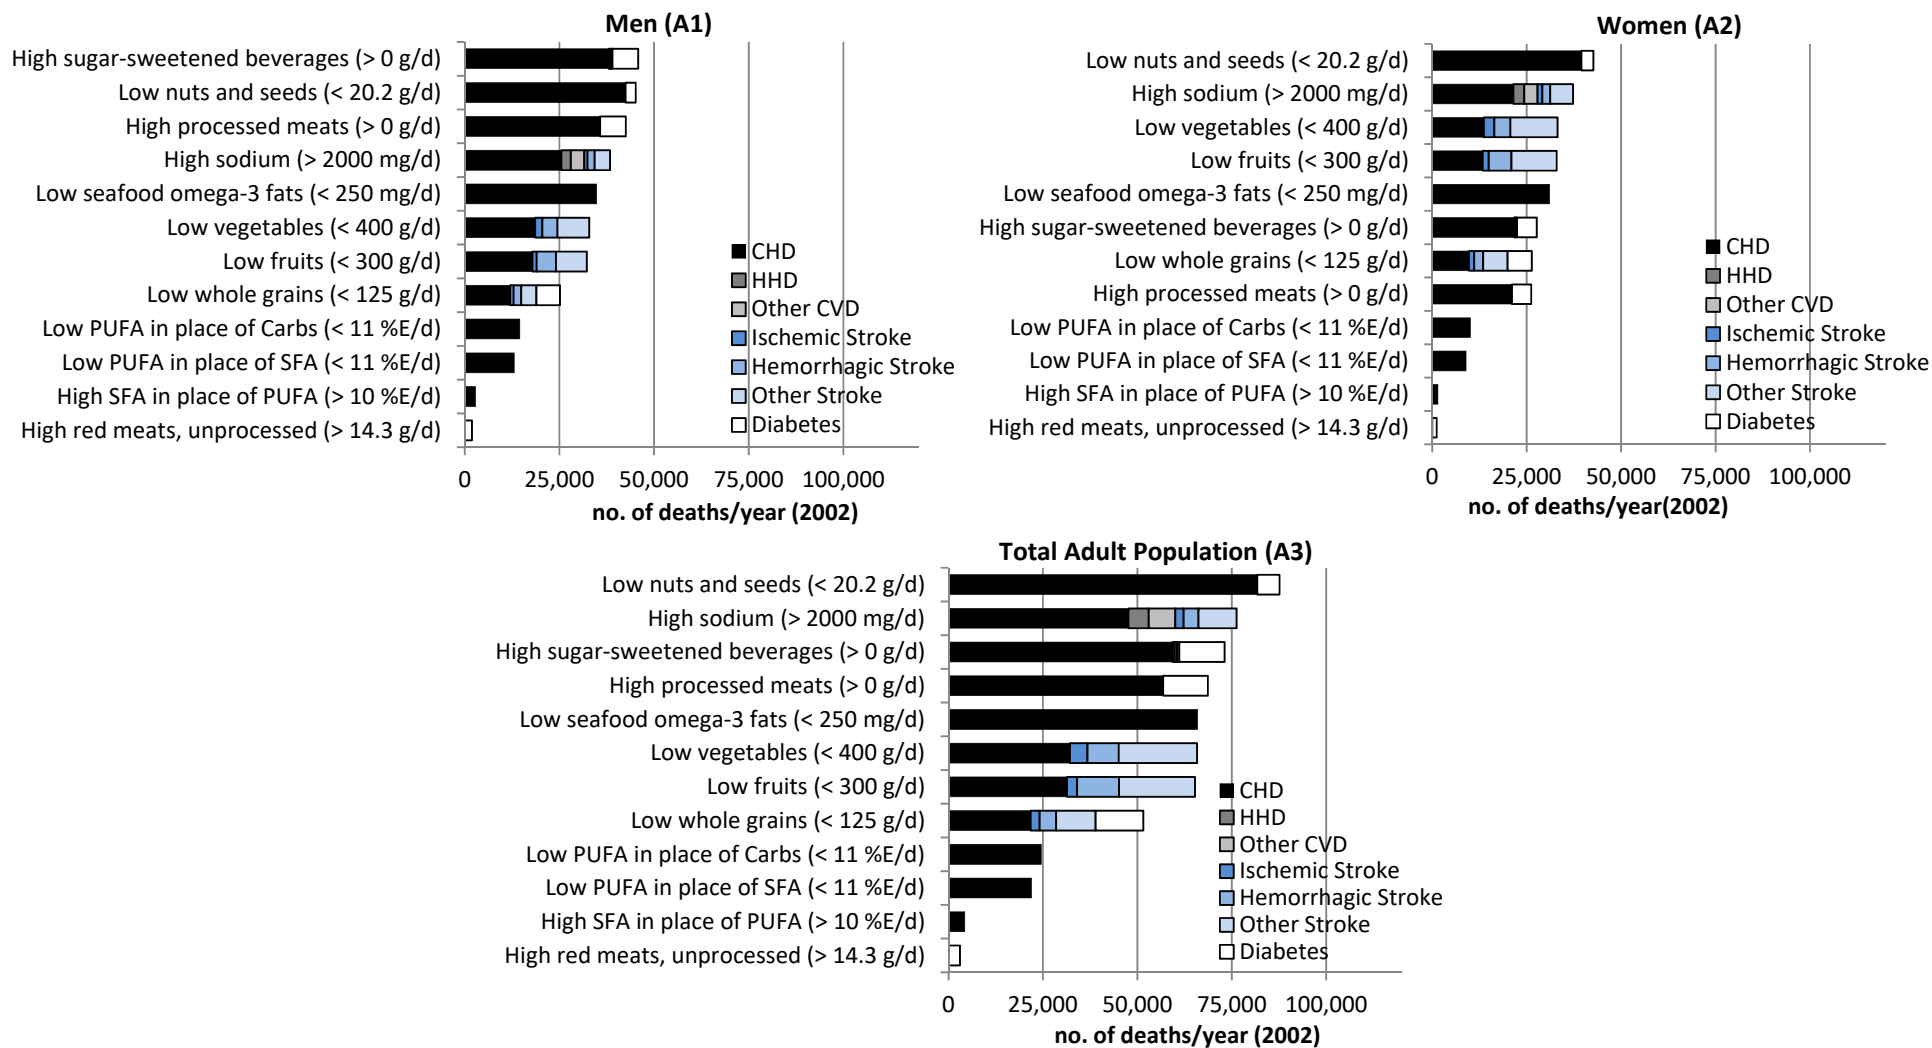

**eFigure 9. Absolute and proportional cardiometabolic disease mortality associated with suboptimal dietary habits in the US in 2002 overall, and by gender.** The bars represent absolute (panels A1, A2, and A3) and percent (panels B1, B2, and B3) cardiometabolic deaths associated with 10 dietary factors, as compared with optimal intakes (values in parentheses); and the error bars, 95% uncertainty intervals. Estimated relationships are nearly identical for polyunsaturated fats (PUFA) replacing carbohydrates (Carbs) or saturated fats (SFA). For comparison, in sensitivity analyses we also evaluated the estimated mortality associated with excess SFA in place of PUFA. PUFA in place of carbs is the same as PUFA in place of carbs or SFA. CHD, coronary heart disease; CVD, cardiovascular disease; HHD, hypertensive heart disease.

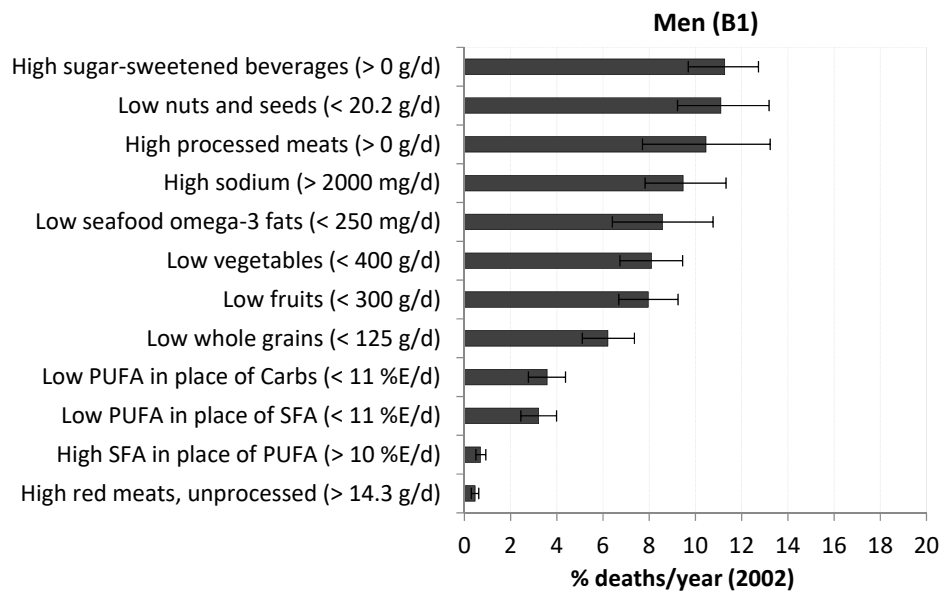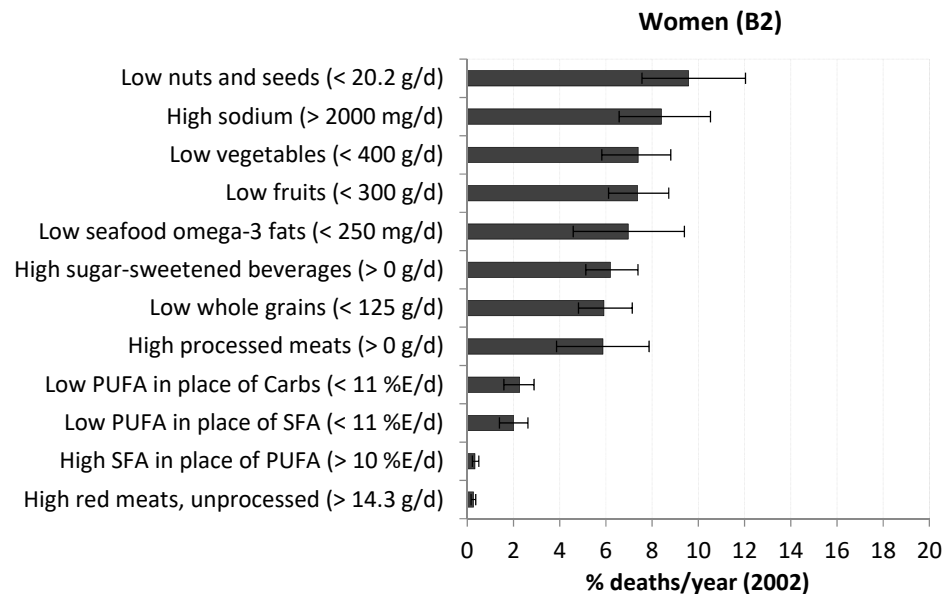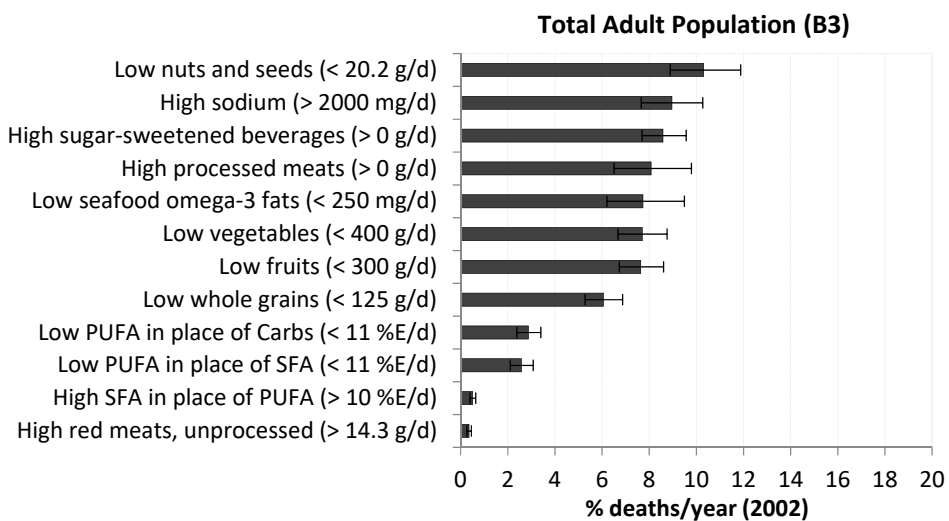

eFigure 9. Absolute and proportional cardiometabolic disease mortality associated with suboptimal dietary habits in the US in 2002 overall, and by gender (continued)

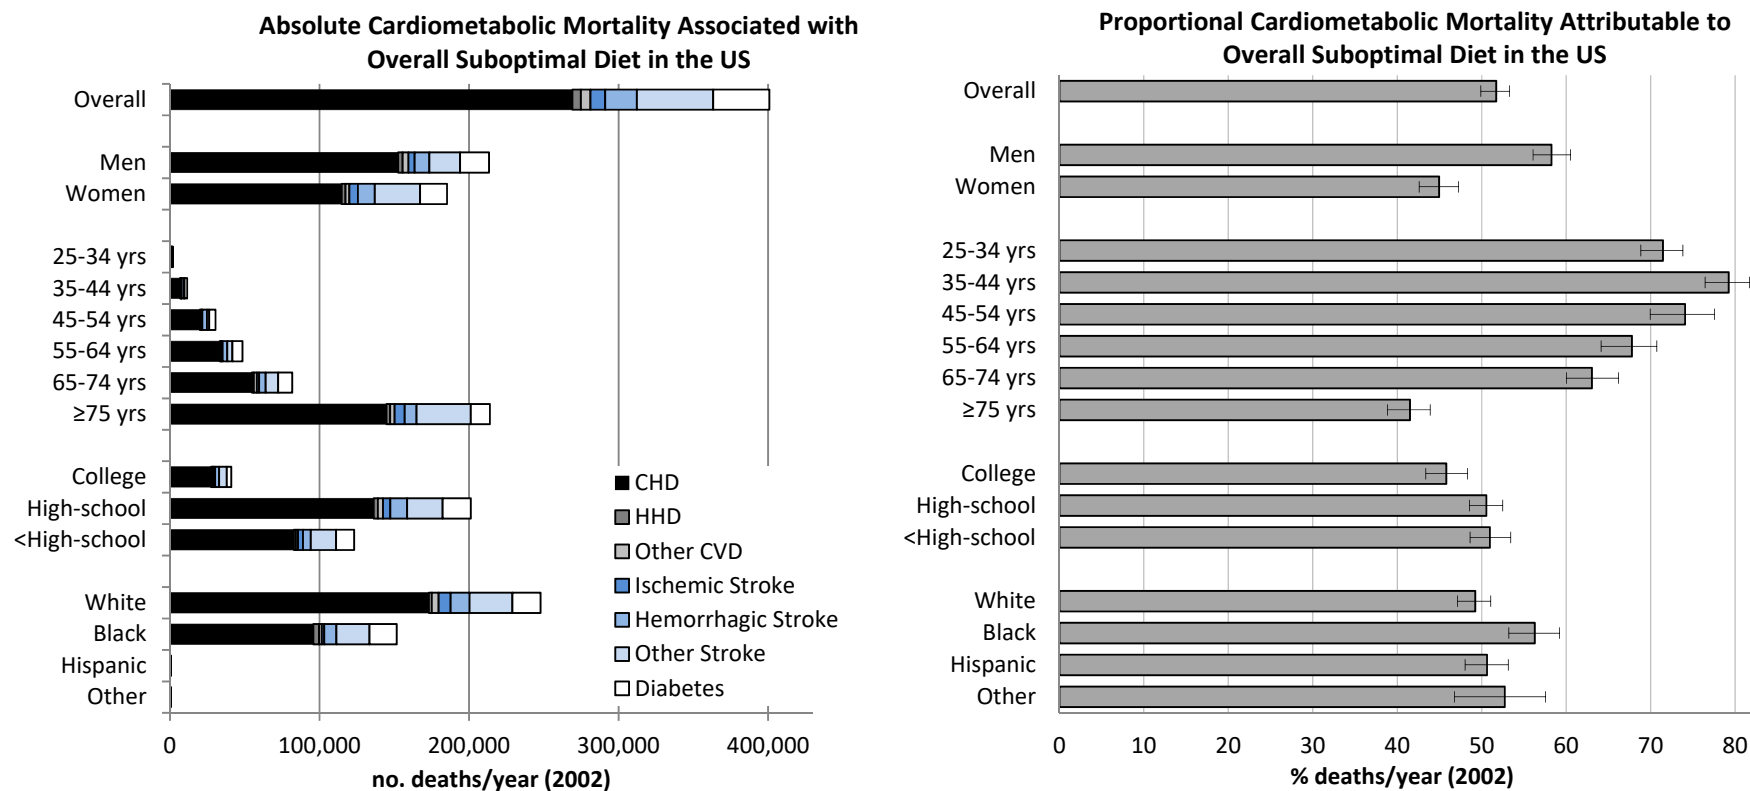

**eFigure 10. Absolute and proportional cardiometabolic disease mortality associated with overall suboptimal diet in the US in 2002 by population subgroups.** The bars represent the estimated absolute (left panel) and percent (right panel) cardiometabolic deaths jointly associated with suboptimal intakes of 10 diet factors; and the error bars, 95% uncertainty intervals. The 10 factors were low intakes of fruits, vegetables, nuts/seeds, whole grains, seafood omega-3 fats, and polyunsaturated fats (replacing saturated fats), and high intakes of sodium, red meats, processed meats, and sugar-sweetened beverages; see Tables 1-2 for details. HHD, hypertensive heart disease; CVD, cardiovascular disease.

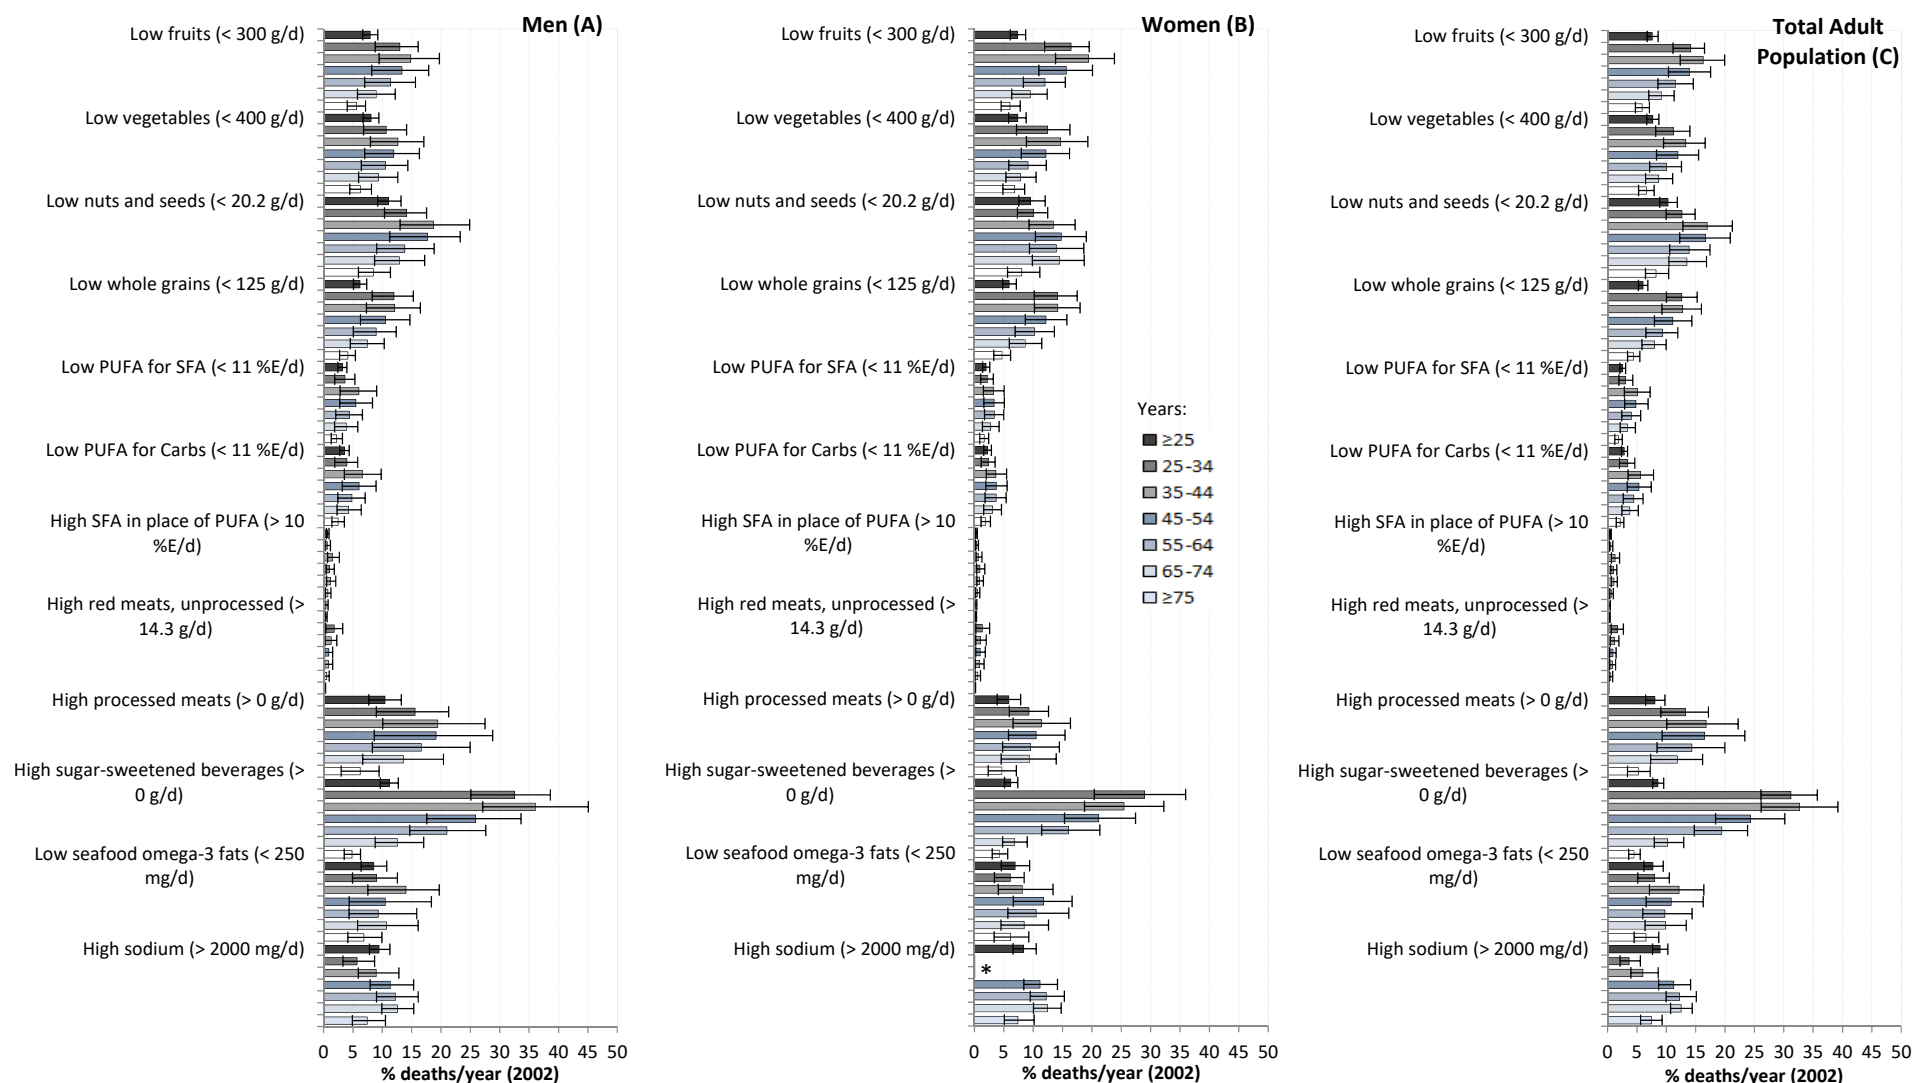

**Figure 11. Proportional cardiometabolic disease mortality associated with suboptimal dietary habits in the US in 2002 by age.** The bars represent the estimated percent cardiometabolic deaths associated with 10 dietary factors among males (panel A) and females (panel B), and for total adult population (panel C) by age, as compared with optimal intakes (values in parentheses); and the error bars, 95% uncertainty intervals. Estimated relationships are nearly identical for polyunsaturated fats (PUFA) replacing carbohydrates (Carbs) or saturated fats (SFA). For comparison, in sensitivity analyses we also evaluated the estimated mortality associated with excess SFA in place of PUFA. PUFA in place of carbs is the same as PUFA in place of carbs or SFA.

\* Based on the evidence, we assumed a log-linear dose-response between systolic blood pressure and cardiovascular disease until a blood pressure level of 115 mm Hg, below which we assumed no further lowering of risk. Systolic blood pressure for females aged 25-34 and 35-44 years was <115 mm Hg.

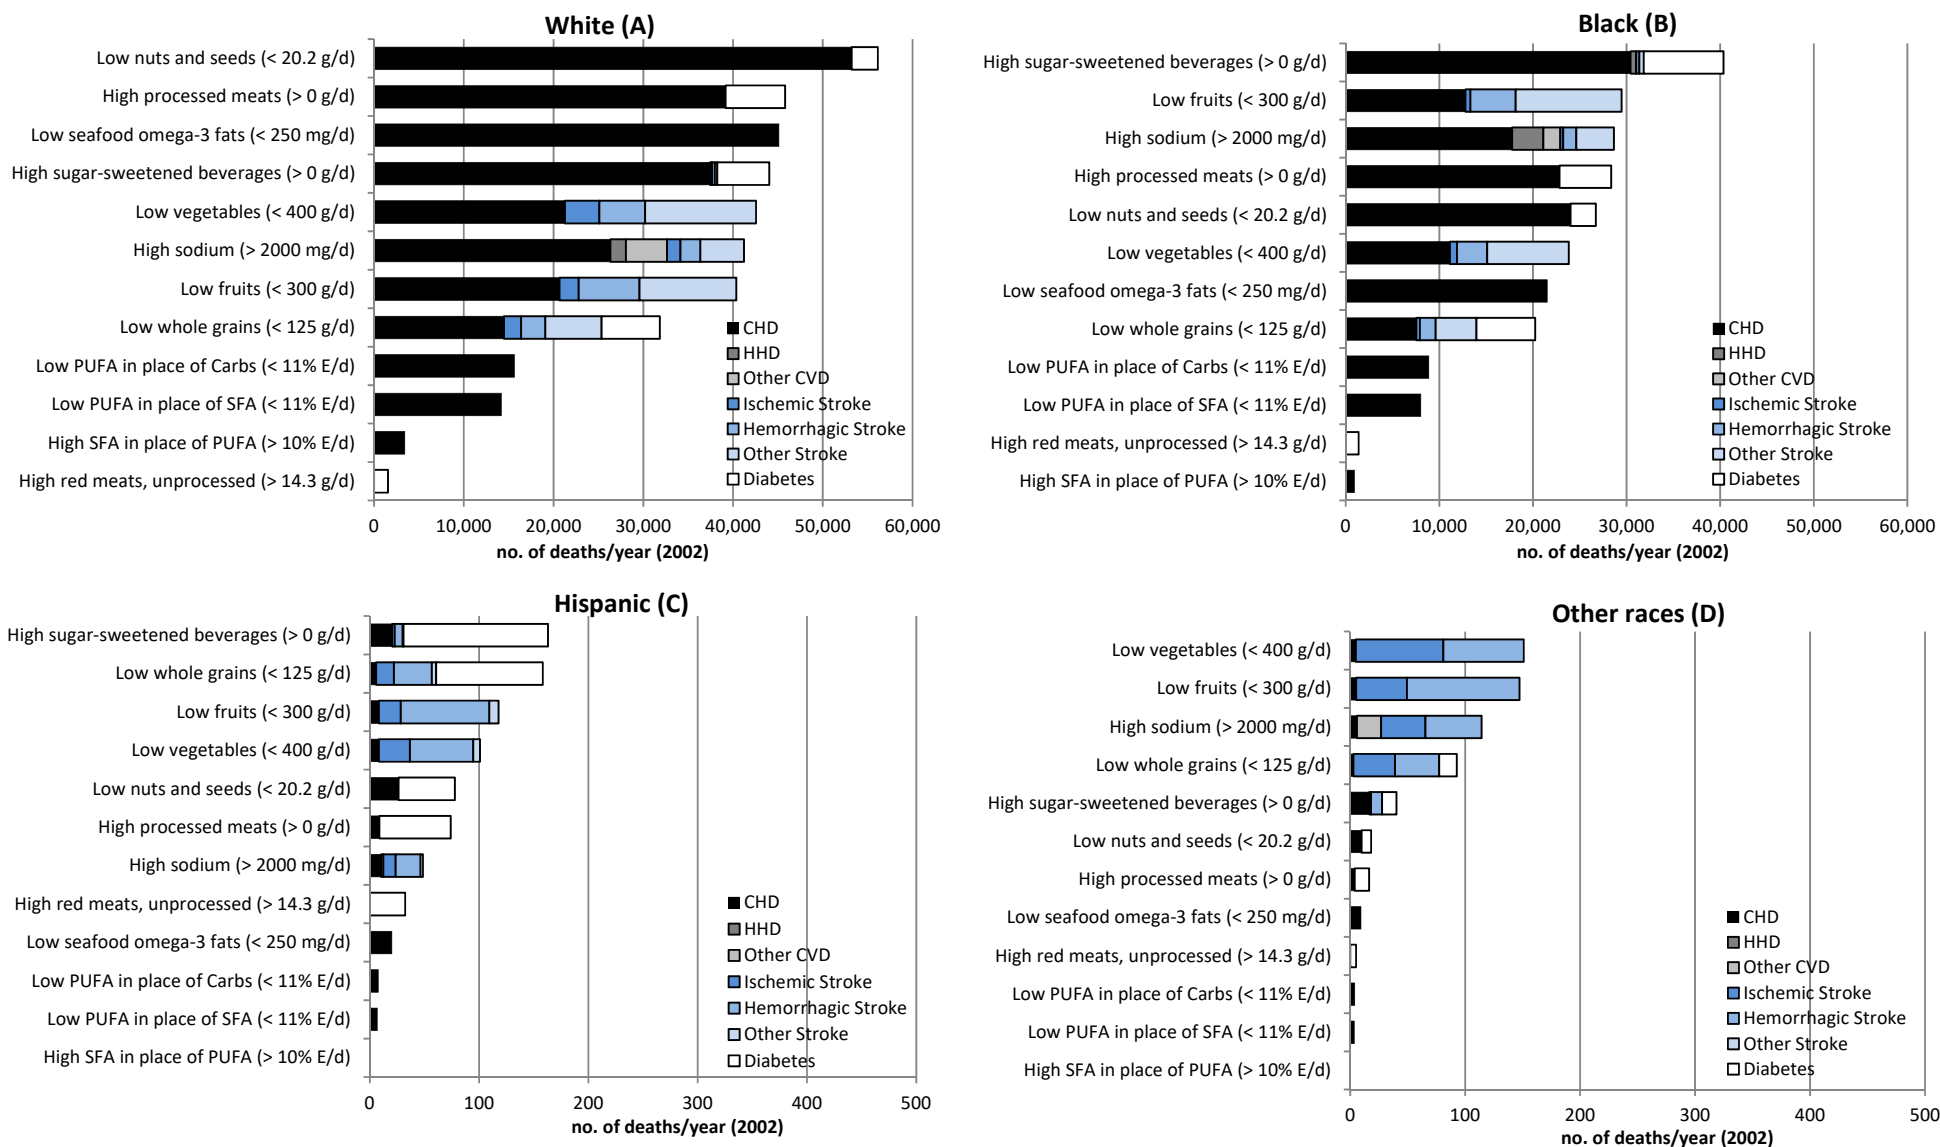

**Figure 12. Absolute cardiometabolic disease mortality associated with suboptimal dietary habits in the US in 2002 by race.** The bars represent absolute cardiometabolic deaths associated with 10 dietary factors among Whites (panel A), Blacks (panel B), Hispanics (panel C), and other races (panel D), as compared with optimal intakes (values in parentheses). Estimated relationships are nearly identical for polyunsaturated fats (PUFA) replacing carbohydrates (Carbs) or saturated fats (SFA). For comparison, in sensitivity analyses we also evaluated the estimated mortality associated with excess SFA in place of PUFA. PUFA in place of carbs is the same as PUFA in place of carbs or SFA. CHD, coronary heart disease; CVD, cardiovascular disease; HHD, hypertensive heart disease.

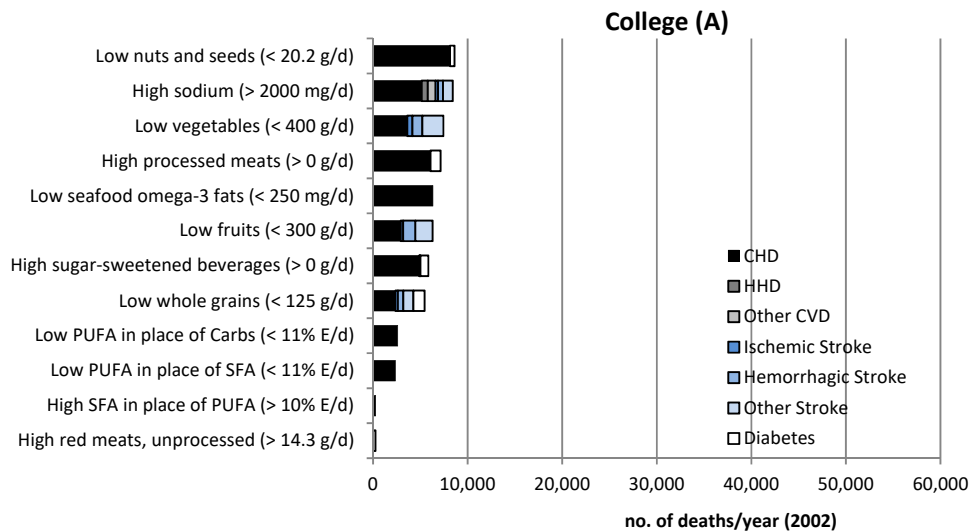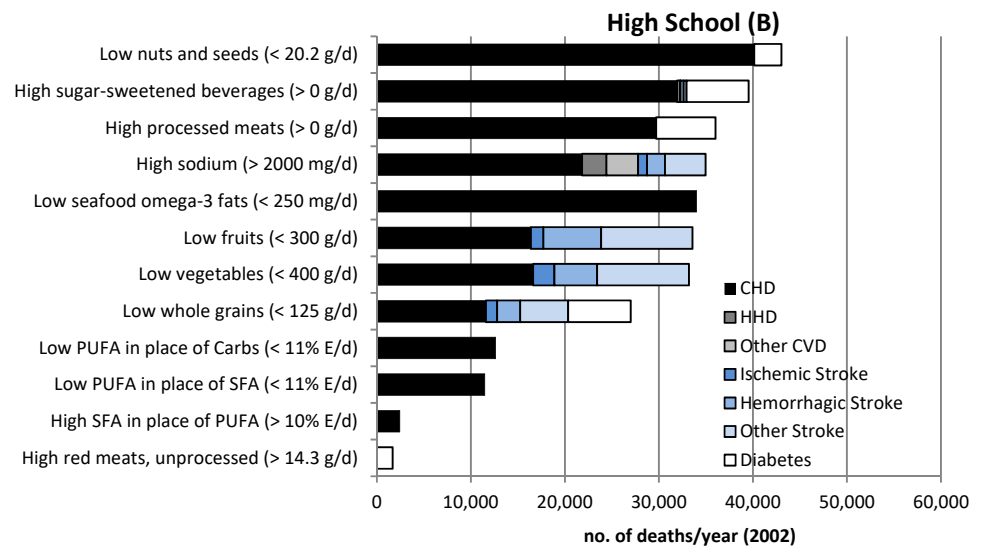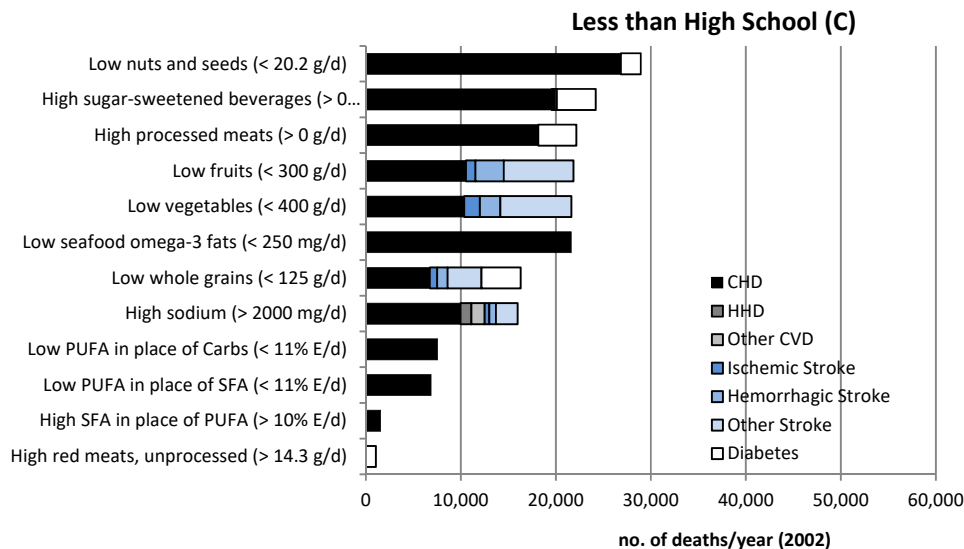

**Figure 13. Absolute cardiometabolic disease mortality associated with suboptimal dietary habits in the US in 2002 by education.** The bars represent absolute cardiometabolic deaths associated with 10 dietary factors among Americans of high (panel A), medium (panel B), and low education (panel C), as compared with optimal intakes (values in parentheses). Estimated relationships are nearly identical for polyunsaturated fats (PUFA) replacing carbohydrates (Carbs) or saturated fats (SFA). For comparison, in sensitivity analyses we also evaluated the estimated mortality associated with excess SFA in place of PUFA. PUFA in place of carbs is the same as PUFA in place of carbs or SFA. CHD, coronary heart disease; CVD, cardiovascular disease; HHD, hypertensive heart disease.

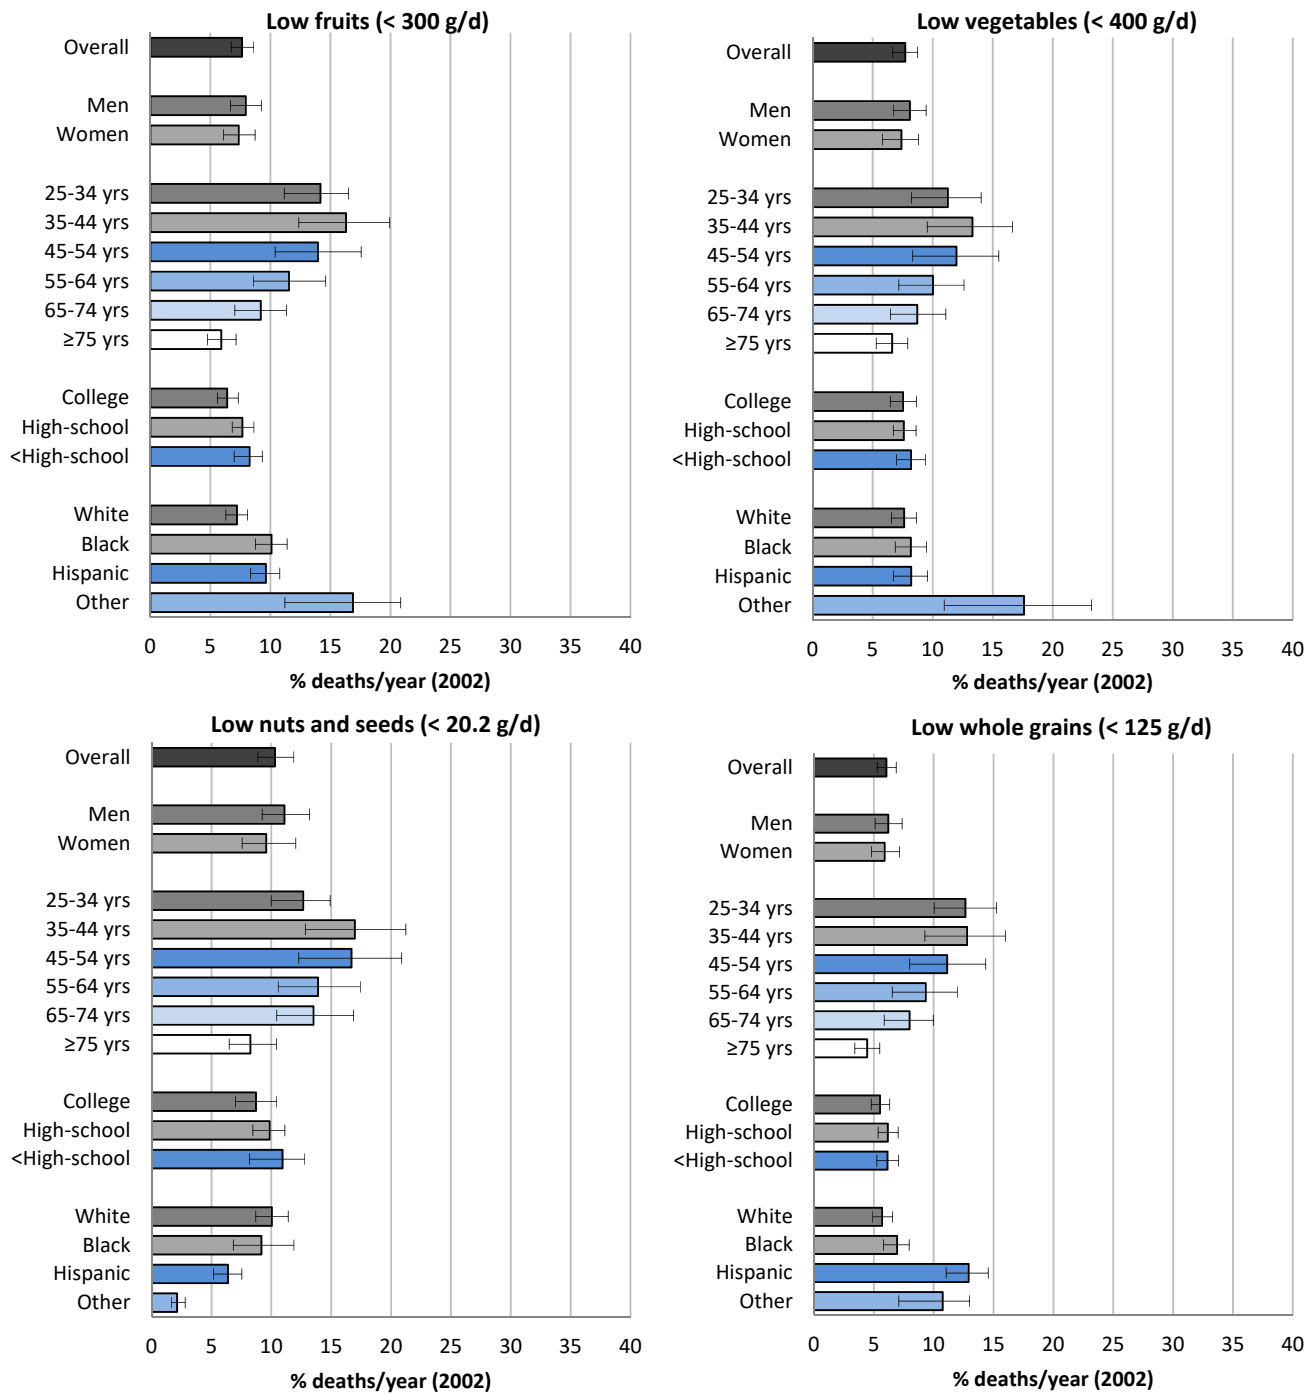

**eFigure 14. Proportional cardiometabolic disease mortality associated with suboptimal dietary habits in the US in 2002 by population subgroups.** The bars represent the estimated percent cardiometabolic deaths associated with 10 dietary factors overall and by population strata (sex, age, education, race), as compared with optimal intakes (values in parentheses); and the error bars, 95% uncertainty intervals. Estimated relationships are nearly identical for polyunsaturated fats (PUFA) replacing carbohydrates (Carbs) or saturated fats (SFA). For comparison, in sensitivity analyses we also evaluated the estimated mortality associated with excess SFA in place of PUFA. PUFA in place of carbs is the same as PUFA in place of carbs or SFA.



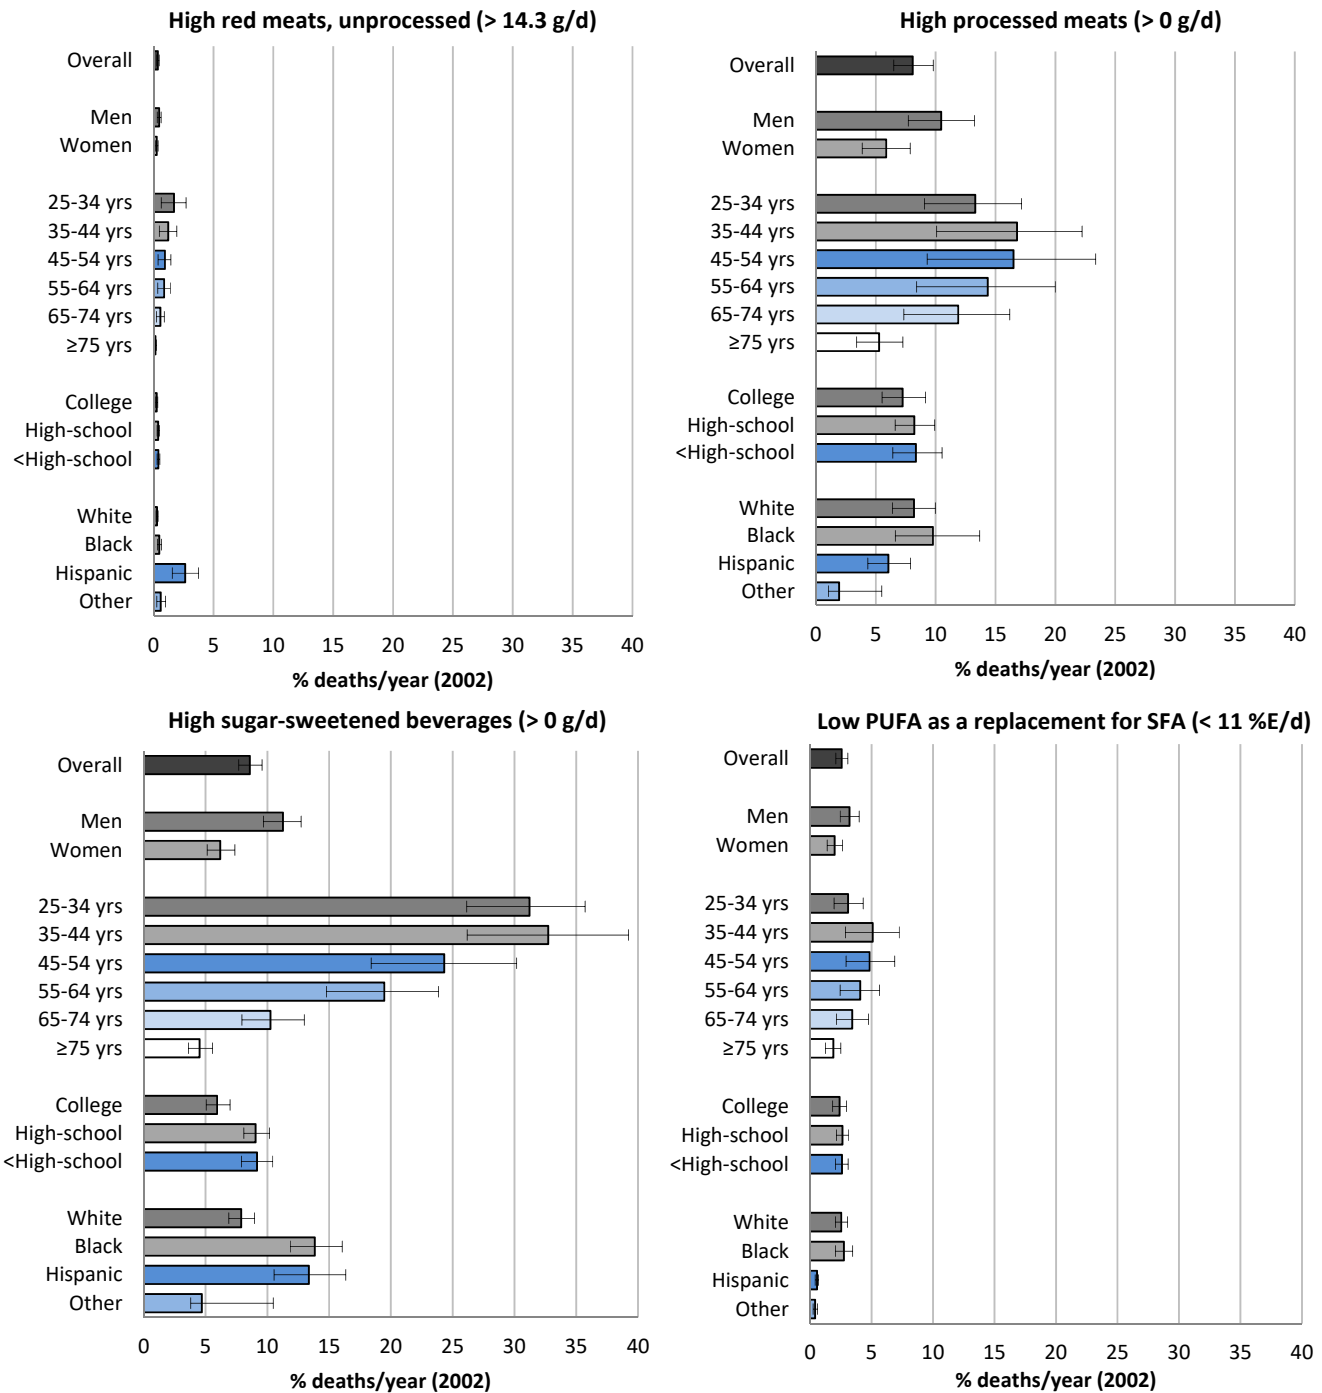

**eFigure 14. Proportional cardiometabolic disease mortality associated with suboptimal dietary habits in the US in 2002 by population subgroups (continued)**

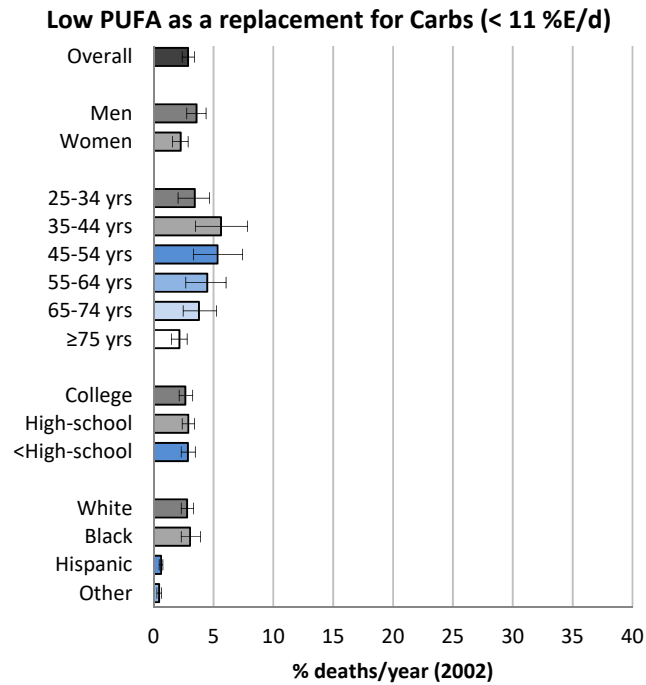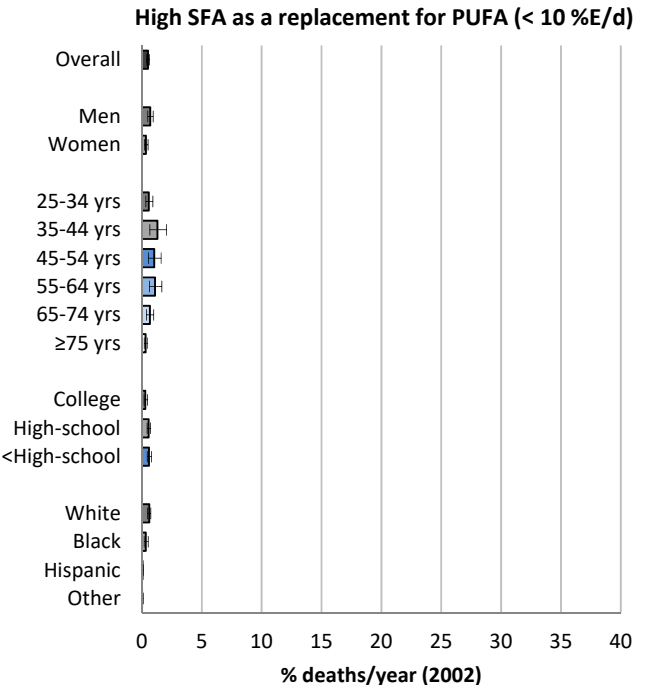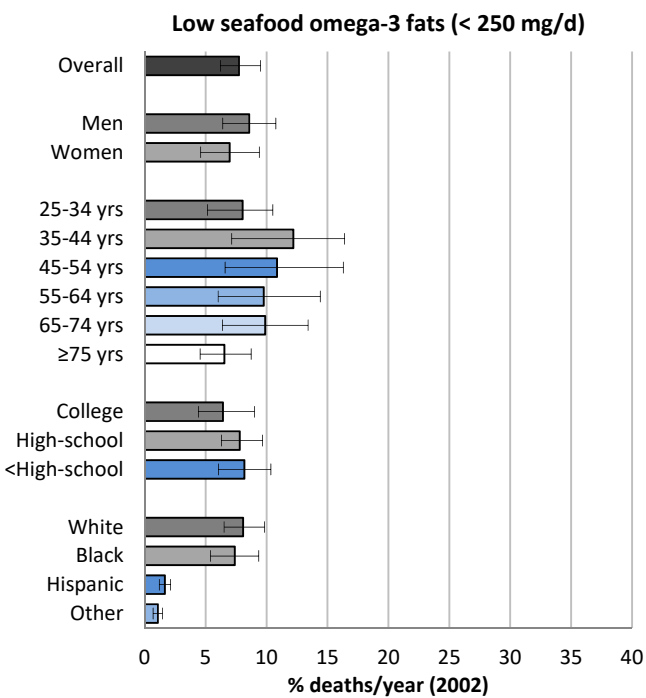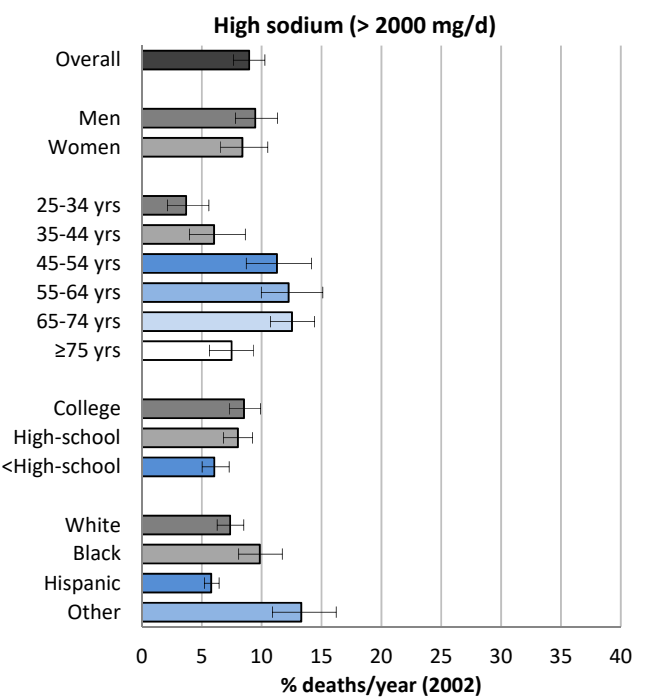

**eFigure 14. Proportional cardiometabolic disease mortality associated with suboptimal dietary habits in the US in 2002 by population subgroups (continued)**

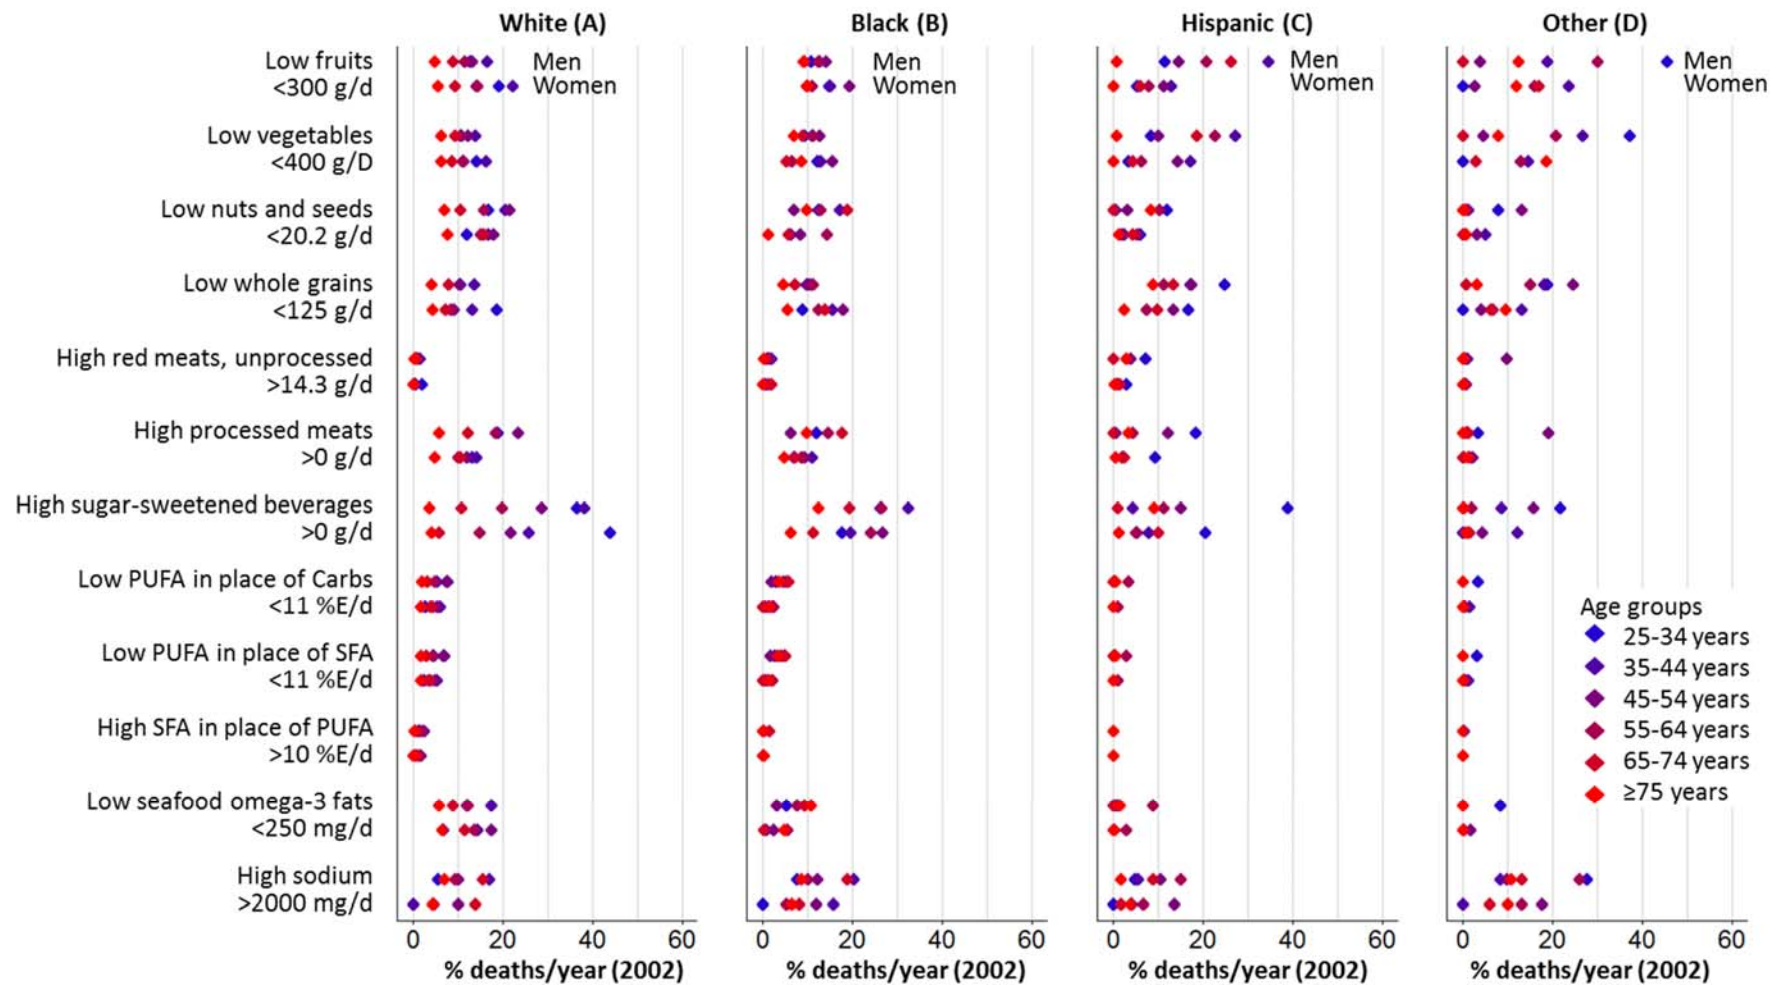

**eFigure 15. Proportional cardiometabolic disease mortality associated with suboptimal dietary habits in the US in 2002 by age, sex, and race.** The diamonds represent percent cardiometabolic deaths associated with 10 dietary factors by age and sex among Whites (panel A), Blacks (panel B), Hispanics (panel C), and other races (panel D), as compared with optimal intakes (values in parentheses). Estimated relationships are nearly identical for polyunsaturated fats (PUFA) replacing carbohydrates (Carbs) or saturated fats (SFA). For comparison, in sensitivity analyses we also evaluated the estimated mortality associated with excess SFA in place of PUFA. PUFA in place of carbs is the same as PUFA in place of carbs or SFA.

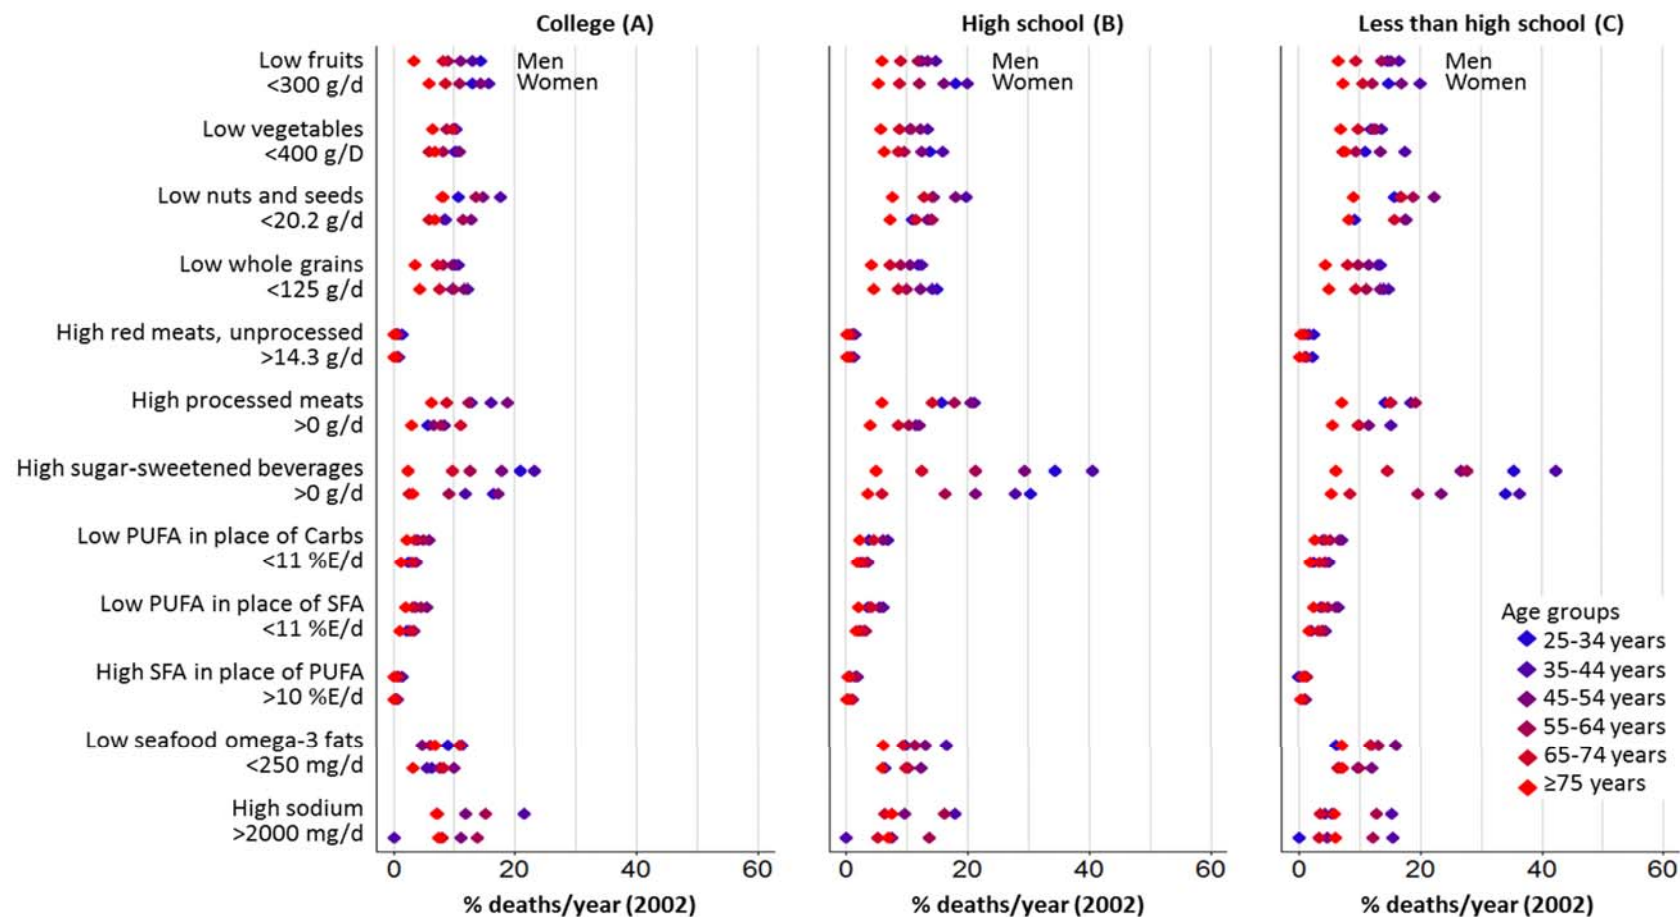

**eFigure 16. Proportional cardiometabolic disease mortality associated with suboptimal dietary habits in the US in 2002 by age, sex, and education.** The diamonds represent percent cardiometabolic deaths associated with 10 dietary factors by age and sex among Americans of high (panel A), medium (panel B), and low (panel C) education, as compared with optimal intakes (values in parentheses). Estimated relationships are nearly identical for polyunsaturated fats (PUFA) replacing carbohydrates (Carbs) or saturated fats (SFA). For comparison, in sensitivity analyses we also evaluated the estimated mortality associated with excess SFA in place of PUFA. PUFA in place of carbs is the same as PUFA in place of carbs or SFA.

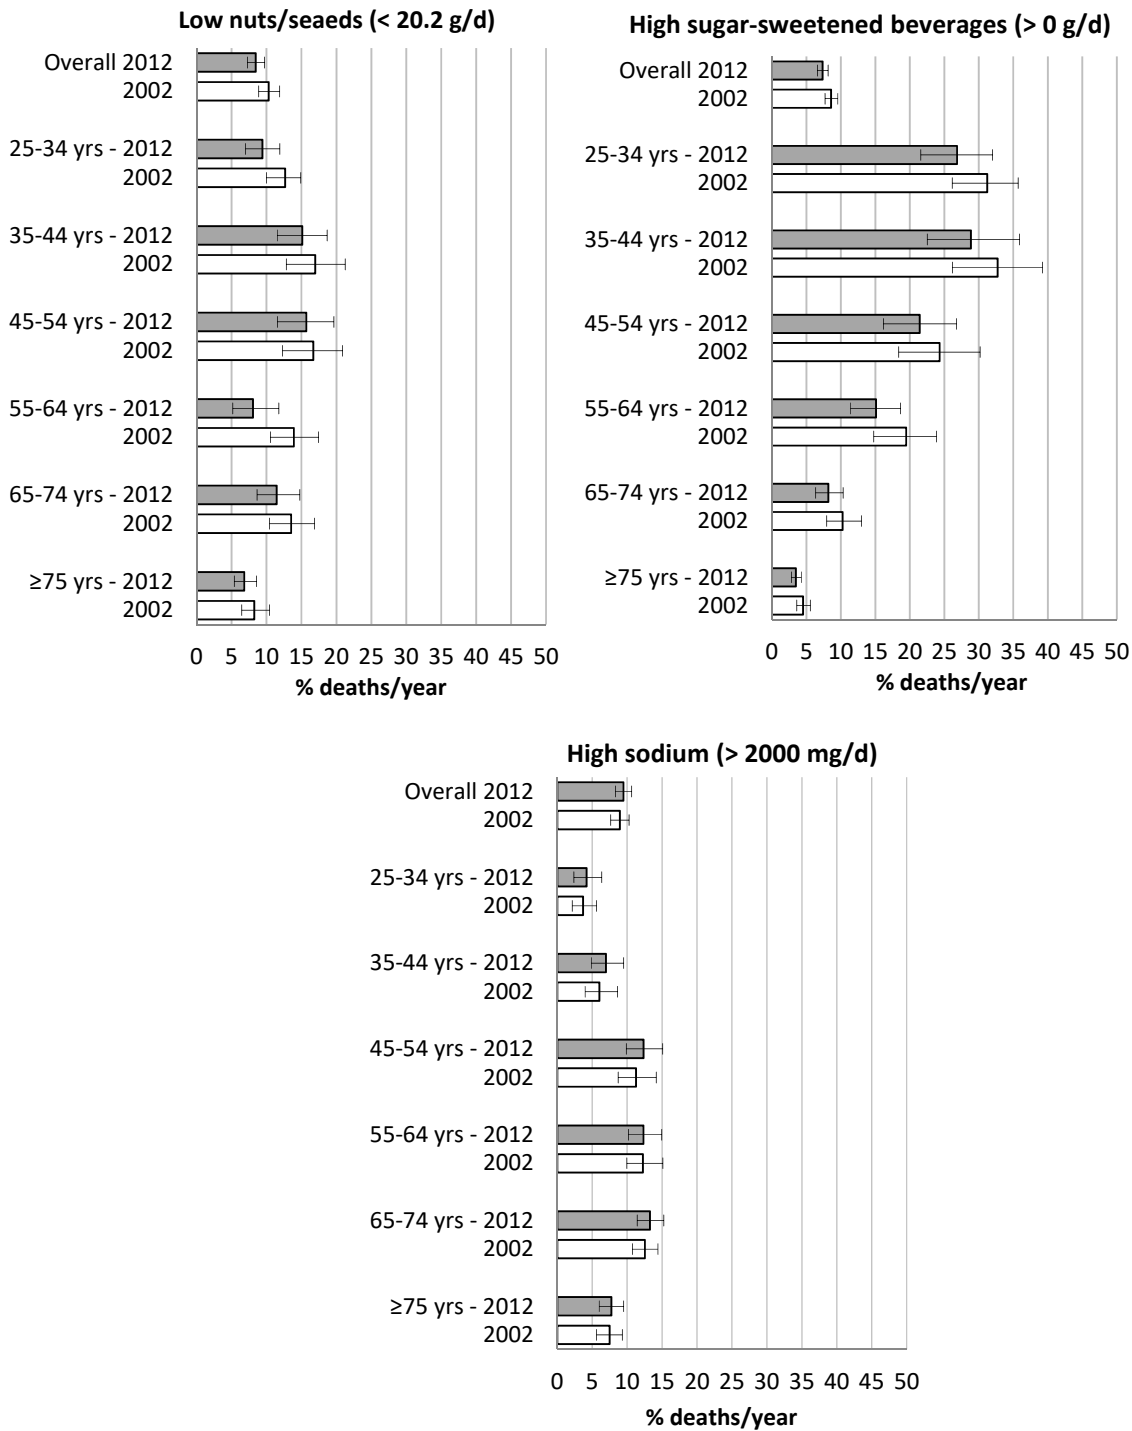

**eFigure 17. Proportional cardiometabolic disease mortality associated with sugar-sweetened beverages, nuts/seeds and sodium by age in 2012 and 2002.** The bars represent the estimated percent cardiometabolic deaths associated with sugar-sweetened beverages, nuts/seeds, and sodium by age in 2012 and 2002, as compared with optimal intakes (values in parentheses); and the error bars, 95% uncertainty intervals.

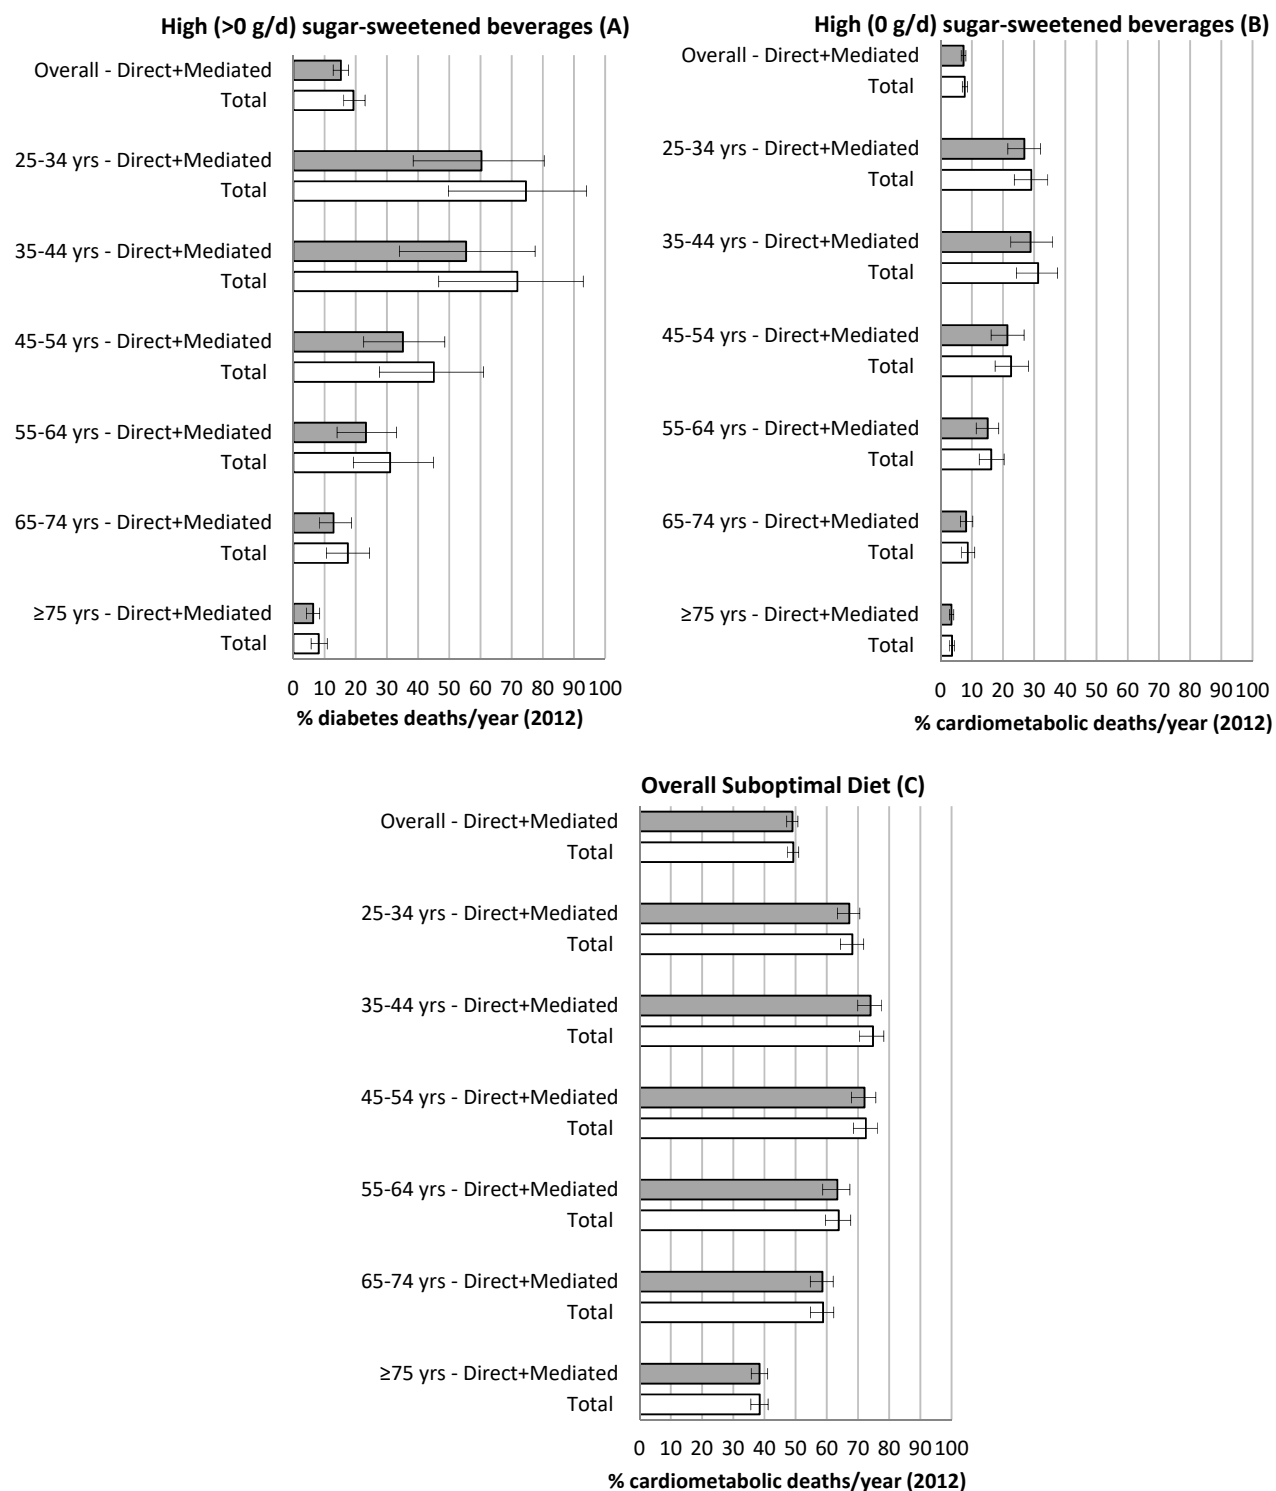

**eFigure 18. Proportional diabetes and cardiometabolic disease mortality associated with sugar-sweetened beverages and overall suboptimal diet in 2012 for direct and BMI-mediated vs. total diabetes effects.** The bars represent the estimated percent sugar-sweetened beverage (SSB)-associated diabetes (panel A) and cardiometabolic deaths (panel B), and overall suboptimal diet-associated cardiometabolic deaths (panel C) for direct (diabetes-BMI adjusted) plus mediated (diabetes-BMI mediated) vs. total (diabetes-BMI unadjusted) SSB diabetes relationships (see eTable 5 for relevant effect sizes); and the error bars, 95% uncertainty intervals. Percent cardiometabolic deaths associated with overall suboptimal diet were estimated as jointly associated with suboptimal intakes of 10 dietary factors, including low intakes of fruits, vegetables, nuts/seeds, whole grains, seafood omega-3 fats, and polyunsaturated fats (replacing saturated fats), and high intakes of sodium, red meats, processed meats, and sugar-sweetened beverages; see Tables 1-2 for details.

## eReferences

1. Murray CJ, Ezzati M, Lopez AD, Rodgers A, Vander Hoorn S. Comparative quantification of health risks conceptual framework and methodological issues. *Popul Health Metr.* 2003;1(1):1.
2. Murray CJ, Ezzati M, Flaxman AD, et al. GBD 2010: a multi-investigator collaboration for global comparative descriptive epidemiology. *Lancet.* 2012;380(9859):2055-2058.
3. Centers for Disease Control and Prevention. National Health and Nutrition Examination Survey. <https://www.cdc.gov/nchs/nhanes/>. Accessed 15 Dec, 2016.
4. Lim SS, Vos T, Flaxman AD, et al. A comparative risk assessment of burden of disease and injury attributable to 67 risk factors and risk factor clusters in 21 regions, 1990-2010: a systematic analysis for the Global Burden of Disease Study 2010. *Lancet.* 2012;380(9859):2224-2260.
5. Singh GM, Danaei G, Farzadfar F, et al. The age-specific quantitative effects of metabolic risk factors on cardiovascular diseases and diabetes: a pooled analysis. *PLoS One.* 2013;8(7):e65174.
6. Singh GM, Micha R, Khatibzadeh S, Lim S, Ezzati M, Mozaffarian D. Estimated Global, Regional, and National Disease Burdens Related to Sugar-Sweetened Beverage Consumption in 2010. *Circulation.* 2015;132(8):639-666.
7. Mozaffarian D, Hao T, Rimm EB, Willett WC, Hu FB. Changes in diet and lifestyle and long-term weight gain in women and men. *N Engl J Med.* 2011;364(25):2392-2404.
8. Mozaffarian D, Fahimi S, Singh GM, et al. Global sodium consumption and death from cardiovascular causes. *N Engl J Med.* 2014;371(7):624-634.
9. Micha R, Kalantarian S, Wirojratana P, et al. Estimating the global and regional burden of suboptimal nutrition on chronic disease: methods and inputs to the analysis. *Eur J Clin Nutr.* 2012;66(1):119-129.
10. Shulkin ML, Micha R, Rao M, Singh GM, Mozaffarian D. Major dietary risk factors for cardiometabolic disease: current evidence for causal effects and effect sizes from the Global Burden of Diseases (GBD) 2015 Study. *Circulation.* 2016;133:AP279.
11. Hill AB. The Environment and Disease: Association or Causation? *Proc R Soc Med.* 1965;58:295-300.
12. WHO. *The World Health Report 2002: Reducing Risks, Promoting Healthy Life.* World Health Organization;2002.
13. World Cancer Research Fund/ American Institute for Cancer Research. *Food, Nutrition, Physical Activity, and the Prevention of Cancer: a Global Perspective.* Washington DC: AICR2007.
14. World Cancer Research Fund/ American Institute for Cancer Research. Continuous Update Project (CUP). [http://www.dietandcancerreport.org/cup/report\\_overview/index.php](http://www.dietandcancerreport.org/cup/report_overview/index.php).
15. Moher D, Liberati A, Tetzlaff J, Altman DG. Preferred reporting items for systematic reviews and meta-analyses: the PRISMA statement. *PLoS Med.* 2009;6(7):e1000097.
16. Jakobsen MU, O'Reilly EJ, Heitmann BL, et al. Major types of dietary fat and risk of coronary heart disease: a pooled analysis of 11 cohort studies. *Am J Clin Nutr.* 2009;89(5):1425-1432.
17. Lawes CM, Rodgers A, Bennett DA, et al. Blood pressure and cardiovascular disease in the Asia Pacific region. *J Hypertens.* 2003;21(4):707-716.
18. Zhang X, Patel A, Horibe H, et al. Cholesterol, coronary heart disease, and stroke in the Asia Pacific region. *Int J Epidemiol.* 2003;32(4):563-572.
19. Lawes CM, Parag V, Bennett DA, et al. Blood glucose and risk of cardiovascular disease in the Asia Pacific region. *Diabetes Care.* 2004;27(12):2836-2842.
20. Ni Mhurchu C, Rodgers A, Pan WH, Gu DF, Woodward M. Body mass index and cardiovascular disease in the Asia-Pacific Region: an overview of 33 cohorts involving 310 000 participants. *Int J Epidemiol.* 2004;33(4):751-758.
21. Lewington S, Clarke R, Qizilbash N, Peto R, Collins R, Prospective Studies C. Age-specific relevance of usual blood pressure to vascular mortality: a meta-analysis of individual data for one million adults in 61 prospective studies. *Lancet.* 2002;360(9349):1903-1913.
22. Lewington S, Whitlock G, Clarke R, et al. Blood cholesterol and vascular mortality by age, sex, and blood pressure: a meta-analysis of individual data from 61 prospective studies with 55,000 vascular deaths. *Lancet.* 2007;370(9602):1829-1839.
23. Whitlock G, Lewington S, Sherliker P, et al. Body-mass index and cause-specific mortality in 900 000 adults: collaborative analyses of 57 prospective studies. *Lancet.* 2009;373(9669):1083-1096.
24. Di Angelantonio E, Sarwar N, Perry P, et al. Major lipids, apolipoproteins, and risk of vascular disease. *JAMA.* 2009;302(18):1993-2000.

25. Gan Y, Tong X, Li L, et al. Consumption of fruit and vegetable and risk of coronary heart disease: a meta-analysis of prospective cohort studies. *Int J Cardiol*. 2015;183:129-137.
26. Joshipura KJ, Ascherio A, Manson JE, et al. Fruit and vegetable intake in relation to risk of ischemic stroke. *JAMA*. 1999;282(13):1233-1239.
27. Johnsen SP, Overvad K, Stripp C, Tjonneland A, Husted SE, Sorensen HT. Intake of fruit and vegetables and the risk of ischemic stroke in a cohort of Danish men and women. *Am J Clin Nutr*. 2003;78(1):57-64.
28. Sauvaget C, Nagano J, Allen N, Kodama K. Vegetable and fruit intake and stroke mortality in the Hiroshima/Nagasaki Life Span Study. *Stroke*. 2003;34(10):2355-2360.
29. Larsson SC, Mannisto S, Virtanen MJ, Kontto J, Albanes D, Virtamo J. Dietary fiber and fiber-rich food intake in relation to risk of stroke in male smokers. *Eur J Clin Nutr*. 2009;63(8):1016-1024.
30. Oude Griep LM, Verschuren WM, Kromhout D, Ocke MC, Geleijnse JM. Raw and processed fruit and vegetable consumption and 10-year stroke incidence in a population-based cohort study in the Netherlands. *Eur J Clin Nutr*. 2011;65(7):791-799.
31. Nagura J, Iso H, Watanabe Y, et al. Fruit, vegetable and bean intake and mortality from cardiovascular disease among Japanese men and women: the JACC Study. *Br J Nutr*. 2009;102(2):285-292.
32. Steffen LM, Jacobs DR, Jr., Stevens J, Shahar E, Carithers T, Folsom AR. Associations of whole-grain, refined-grain, and fruit and vegetable consumption with risks of all-cause mortality and incident coronary artery disease and ischemic stroke: the Atherosclerosis Risk in Communities (ARIC) Study. *Am J Clin Nutr*. 2003;78(3):383-390.
33. Mizrahi A, Knekt P, Montonen J, Laaksonen MA, Heliövaara M, Jarvinen R. Plant foods and the risk of cerebrovascular diseases: a potential protection of fruit consumption. *Br J Nutr*. 2009;102(7):1075-1083.
34. Afshin A, Micha R, Khatibzadeh S, Mozaffarian D. Consumption of nuts and legumes and risk of incident ischemic heart disease, stroke, and diabetes: a systematic review and meta-analysis. *Am J Clin Nutr*. 2014;100(1):278-288.
35. Mellen PB, Walsh TF, Herrington DM. Whole grain intake and cardiovascular disease: a meta-analysis. *Nutr Metab Cardiovasc Dis*. 2008;18(4):283-290.
36. Aune D, Norat T, Romundstad P, Vatten LJ. Whole grain and refined grain consumption and the risk of type 2 diabetes: a systematic review and dose-response meta-analysis of cohort studies. *Eur J Epidemiol*. 2013;28(11):845-858.
37. Pan A, Sun Q, Bernstein AM, et al. Red meat consumption and risk of type 2 diabetes: 3 cohorts of US adults and an updated meta-analysis. *Am J Clin Nutr*. 2011;94(4):1088-1096.
38. Micha R, Wallace SK, Mozaffarian D. Red and processed meat consumption and risk of incident coronary heart disease, stroke, and diabetes mellitus: a systematic review and meta-analysis. *Circulation*. 2010;121(21):2271-2283.
39. Zheng J, Huang T, Yu Y, Hu X, Yang B, Li D. Fish consumption and CHD mortality: an updated meta-analysis of seventeen cohort studies. *Public Health Nutr*. 2012;15(4):725-737.
40. Chen M, Sun Q, Giovannucci E, et al. Dairy consumption and risk of type 2 diabetes: 3 cohorts of US adults and an updated meta-analysis. *BMC Med*. 2014;12:215.
41. Imamura F, O'Connor L, Ye Z, et al. Consumption of sugar sweetened beverages, artificially sweetened beverages, and fruit juice and incidence of type 2 diabetes: systematic review, meta-analysis, and estimation of population attributable fraction. *Bmj*. 2015;351:h3576.
42. Xi B, Huang Y, Reilly KH, et al. Sugar-sweetened beverages and risk of hypertension and CVD: a dose-response meta-analysis. *Br J Nutr*. 2015;113(5):709-717.
43. Farvid MS, Ding M, Pan A, et al. Dietary Linoleic Acid and Risk of Coronary Heart Disease: A Systematic Review and Meta-Analysis of Prospective Cohort Studies. *Circulation*. 2014.
44. Mozaffarian D, Rimm EB. Fish intake, contaminants, and human health: evaluating the risks and the benefits. *JAMA*. 2006;296(15):1885-1899.
45. Mozaffarian D, Katan MB, Ascherio A, Stampfer MJ, Willett WC. Trans fatty acids and cardiovascular disease. *N Engl J Med*. 2006;354(15):1601-1613.
46. Threapleton DE, Greenwood DC, Evans CE, et al. Dietary fibre intake and risk of cardiovascular disease: systematic review and meta-analysis. *BMJ*. 2013;347:f6879.
47. Threapleton DE, Greenwood DC, Evans CE, et al. Dietary fiber intake and risk of first stroke: a systematic review and meta-analysis. *Stroke*. 2013;44(5):1360-1368.
48. Yao B, Fang H, Xu W, et al. Dietary fiber intake and risk of type 2 diabetes: a dose-response analysis of prospective studies. *Eur J Epidemiol*. 2014;29(2):79-88.



49. Mirrahimi A, Chiavaroli L, Srichaikul K, et al. The role of glycemic index and glycemic load in cardiovascular disease and its risk factors: a review of the recent literature. *Curr Atheroscler Rep.* 2014;16(1):381.
50. Cai X, Wang C, Wang S, et al. Carbohydrate Intake, Glycemic Index, Glycemic Load, and Stroke: A Meta-analysis of Prospective Cohort Studies. *Asia Pac J Public Health.* 2015;27(5):486-496.
51. Bhupathiraju SN, Tobias DK, Malik VS, et al. Glycemic index, glycemic load, and risk of type 2 diabetes: results from 3 large US cohorts and an updated meta-analysis. *Am J Clin Nutr.* 2014;100(1):218-232.
52. Poggio R, Gutierrez L, Matta MG, Elorriaga N, Irazola V, Rubinstein A. Daily sodium consumption and CVD mortality in the general population: systematic review and meta-analysis of prospective studies. *Public Health Nutr.* 2015;18(4):695-704.
53. D'Elia L, Barba G, Cappuccio FP, Strazzullo P. Potassium intake, stroke, and cardiovascular disease a meta-analysis of prospective studies. *J Am Coll Cardiol.* 2011;57(10):1210-1219.
54. Greenland S, Longnecker MP. Methods for trend estimation from summarized dose-response data, with applications to meta-analysis. *Am J Epidemiol.* 1992;135(11):1301-1309.
55. Orsini N, Bellocco R, Greenland S. Generalized least squares for trend estimation of summarized dose-response data. *Stata Journal.* 2006;6(1):40-57.
56. Nishida C, Uauy R. WHO Scientific Update on health consequences of trans fatty acids: introduction. *Eur J Clin Nutr.* 2009;63 Suppl 2:S1-4.
57. INTERSALT Cooperative Research Group. Intersalt: an international study of electrolyte excretion and blood pressure. Results for 24 hour urinary sodium and potassium excretion. Intersalt Cooperative Research Group. *BMJ.* 1988;297(6644):319-328.
58. Sacks FM, Svetkey LP, Vollmer WM, et al. Effects on blood pressure of reduced dietary sodium and the Dietary Approaches to Stop Hypertension (DASH) diet. DASH-Sodium Collaborative Research Group. *N Engl J Med.* 2001;344(1):3-10.
59. Aburto NJ, Ziolkovska A, Hooper L, Elliott P, Cappuccio FP, Meerpohl JJ. Effect of lower sodium intake on health: systematic review and meta-analyses. *BMJ.* 2013;346:f1326.
60. National Institute for Health and Clinical Excellence. *Prevention of cardiovascular disease at population level (NICE public health guidance 25).* London: National Institute for Health and Clinical Excellence; 2010.
61. Whelton PK, Appel LJ, Sacco RL, et al. Sodium, blood pressure, and cardiovascular disease: further evidence supporting the american heart association sodium reduction recommendations. *Circulation.* 2012;126(24):2880-2889.
62. World Health Organization. *WHO Guideline: Sodium intake for adults and children.* Geneva: WHO; 2012.
63. Scientific Advisory Committee on Nutrition. *Salt and Health.* London: The Stationery Office; 2003.
64. World Health Organization. *WHO Guideline: Potassium intake for adults and children.* Geneva 2012.
65. Khatibzadeh S, Saheb Kashaf M, Micha R, et al. A global database of food and nutrient consumption. *Bull World Health Organ.* 2016;94(12):931-934.
66. Powles J, Fahimi S, Micha R, et al. Global, regional and national sodium intakes in 1990 and 2010: a systematic analysis of 24 h urinary sodium excretion and dietary surveys worldwide. *BMJ Open.* 2013;3(12):e003733.
67. Micha R, Khatibzadeh S, Shi P, et al. Global, regional, and national consumption levels of dietary fats and oils in 1990 and 2010: a systematic analysis including 266 country-specific nutrition surveys. *BMJ.* 2014;348:g2272.
68. Micha R, Khatibzadeh S, Shi P, Andrews KG, Engell RE, Mozaffarian D. Global, regional and national consumption of major food groups in 1990 and 2010: a systematic analysis including 266 country-specific nutrition surveys worldwide. *BMJ Open.* 2015;5(9).
69. Singh GM, Micha R, Khatibzadeh S, et al. Global, Regional, and National Consumption of Sugar-Sweetened Beverages, Fruit Juices, and Milk: A Systematic Assessment of Beverage Intake in 187 Countries. *PLoS One.* 2015;10(8):e0124845.
70. Eilander A, Harika RK, Zock PL. Intake and sources of dietary fatty acids in Europe: Are current population intakes of fats aligned with dietary recommendations? *Eur J Lipid Sci Technol.* 2015;117(9):1370-1377.
71. Wang Q, Afshin A, Yakoob MY, et al. Impact of Nonoptimal Intakes of Saturated, Polyunsaturated, and Trans Fat on Global Burdens of Coronary Heart Disease. *J Am Heart Assoc.* 2016;5(1):e002891.
72. Lloyd-Jones DM, Hong Y, Labarthe D, et al. Defining and setting national goals for cardiovascular health promotion and disease reduction: the American Heart Association's strategic Impact Goal through 2020 and beyond. *Circulation.* 2010;121(4):586-613.
73. U.S. Department of Agriculture, U.S. Department of Health and Human Services. 2015-2020 Dietary Guidelines For Americans. 2015; 8th: <http://health.gov/dietaryguidelines/2015/guidelines/>.
74. FAO. *Fats and fatty acids in human nutrition. Report of an expert consultation.* Geneva 2010. 91.

75. Hu FB, Rimm EB, Stampfer MJ, Ascherio A, Spiegelman D, Willett WC. Prospective study of major dietary patterns and risk of coronary heart disease in men. *Am J Clin Nutr.* 2000;72(4):912-921.
76. Fung TT, Willett WC, Stampfer MJ, Manson JE, Hu FB. Dietary patterns and the risk of coronary heart disease in women. *Arch Intern Med.* 2001;161(15):1857-1862.
77. Fung TT, Rexrode KM, Mantzoros CS, Manson JE, Willett WC, Hu FB. Mediterranean diet and incidence of and mortality from coronary heart disease and stroke in women. *Circulation.* 2009;119(8):1093-1100.
78. Trichopoulou A, Bamia C, Trichopoulos D. Anatomy of health effects of Mediterranean diet: Greek EPIC prospective cohort study. *BMJ.* 2009;338:b2337.
79. Martinez-Gonzalez MA, de la Fuente-Arrillaga C, Lopez-Del-Burgo C, Vazquez-Ruiz Z, Benito S, Ruiz-Canela M. Low consumption of fruit and vegetables and risk of chronic disease: a review of the epidemiological evidence and temporal trends among Spanish graduates. *Public Health Nutr.* 2011;14(12A):2309-2315.
80. Appel LJ, Moore TJ, Obarzanek E, et al. A clinical trial of the effects of dietary patterns on blood pressure. DASH Collaborative Research Group. *N Engl J Med.* 1997;336(16):1117-1124.
81. Appel LJ, Sacks FM, Carey VJ, et al. Effects of protein, monounsaturated fat, and carbohydrate intake on blood pressure and serum lipids: results of the OmniHeart randomized trial. *JAMA.* 2005;294(19):2455-2464.
82. Baigent C, Keech A, Kearney PM, et al. Efficacy and safety of cholesterol-lowering treatment: prospective meta-analysis of data from 90,056 participants in 14 randomised trials of statins. *Lancet.* 2005;366(9493):1267-1278.
83. Law MR, Wald NJ, Rudnicka AR. Quantifying effect of statins on low density lipoprotein cholesterol, ischaemic heart disease, and stroke: systematic review and meta-analysis. *BMJ.* 2003;326(7404):1423.
84. Estruch R, Ros E, Salas-Salvado J, et al. Primary prevention of cardiovascular disease with a Mediterranean diet. *N Engl J Med.* 2013;368(14):1279-1290.
85. Mozaffarian D. Mediterranean diet for primary prevention of cardiovascular disease. *N Engl J Med.* 2013;369(7):673-674.
86. World Health Organization. *Diet, nutrition and the prevention of chronic diseases: report of a joint WHO/FAO expert consultation.* Geneva2003. 916: i-viii.
87. Bowman SA, Celemens JC, Friday JE, Thoenig RC, Moshfegh A. *Food Patterns Equivalents Database 2011-12: Methodology and User Guide [Online].* Beltsville Human Nutrition Research Center, Agricultural Research Service, U.S. Department of Agriculture, Beltsville, MD;2014.
88. Centers for Disease Control and Prevention. National Health and Nutrition Examination Survey: MEC In-Person Dietary Interviewers Procedures Manual. 2011; [http://www.cdc.gov/nchs/data/nhanes/nhanes\\_11\\_12/Dietary\\_MEC\\_In-Person\\_Interviewers\\_Manual.pdf](http://www.cdc.gov/nchs/data/nhanes/nhanes_11_12/Dietary_MEC_In-Person_Interviewers_Manual.pdf).
89. Willett WC. Correction for the effects of measurement error. *Nutritional Epidemiology.* 3rd ed. Oxford, England: Oxford University Press; 2013:287-304.
90. Bowman SA, Friday JE, Moshfegh A. *MyPyramid Equivalents Database, 2.0 for USDA Survey Foods, 2003-2004 [Online].* Beltsville Human Nutrition Research Center, Agricultural Research Service, U.S. Department of Agriculture, Beltsville, MD;2008.
91. Ezzati M, Lopez AD, Rodgers A, Murray CJ. *Comparative Quantification of Health Risks: Global and Regional Burden of Disease Attributable to Selected Major Risk Factors (Volumes 1 and 2).* Geneva: World Health Organization; 2004.
92. Micha R, Michas G, Mozaffarian D. Unprocessed red and processed meats and risk of coronary artery disease and type 2 diabetes--an updated review of the evidence. *Curr Atheroscler Rep.* 2012;14(6):515-524.
